# Supplementary material for: Gene network analysis identifies a central post-transcriptional regulator of cellular stress survival
Source: eLife journal article supplement (doi:10.7554/elife.33684), 2018-03-14
Supplement: supp [file elife-33684-supp-v1.zip]

Archive with 21 entries (21 files):
- elife_poa_e33684_Figure_6_figure_supplement_2.ai
- elife_poa_e33684_Figure_1_figure_supplement_2.ai
- elife_poa_e33684_Figure_2_figure_supplement_1.ai
- elife_poa_e33684_Figure_8_source_data_1.xlsx
- elife_poa_e33684_Figure_8_source_data_3.xlsx
- elife_poa_e33684_Figure_1_source_data_1.xlsx
- elife_poa_e33684_Figure_6_figure_supplement_3.ai
- elife_poa_e33684_Figure_5_source_data_2.zip
- elife_poa_e33684_Figure_1_source_data_2.xlsx
- elife_poa_e33684_Figure_8_figure_supplement_1.ai
- elife_poa_e33684_Figure_1_figure_supplement_1.ai
- elife_poa_e33684_Figure_5_figure_supplement_1.ai
- elife_poa_e33684_Figure_6_figure_supplement_1.ai
- elife_poa_e33684_Figure_8_source_data_2.xlsx
- elife_poa_e33684_Figure_8_figure_supplement_2.ai
- elife_poa_e33684_Figure_3_figure_supplement_1.ai
- elife_poa_e33684_Figure_5_source_data_1.xlsx
- elife_poa_e33684_Supplementary_File_1.xlsx
- elife_poa_e33684_Figure_5_source_data_3.txt
- elife_poa_e33684_Transparent_Reporting_File.pdf
- elife_poa_e33684_Figure_3_figure_supplement_2.ai
