# Supplementary material for: Gene network analysis identifies a central post-transcriptional regulator of cellular stress survival
Source: eLife journal article supplement (doi:10.7554/elife.33684), 2018-03-14
Supplement: supp [file elife-33684-supp-v1.zip › elife_poa_e33684_Figure_1_source_data_1.xlsx]

## Sheet: plotted
CCNA	Expression F_SW	Expression F_ST	Expression F_EPD	Expression F_PD	Expression F_LPD
CCNA_00589	0.0962389	0.150442	0.271018	0.255531	0.22677
CCNA_03587	0.166667	0.283951	0.209877	0.123457	0.216049
CCNA_00456	0.105263	0.210526	0.210526	0.22807	0.245614
CCNA_03579	0.222222	0.232323	0.242424	0.121212	0.181818
CCNA_01601	0.345763	0.215254	0.138136	0.090678	0.210169
CCNA_03592	0.139535	0.232558	0.139535	0.186047	0.302326
mcsS	0.205882	0.235294	0.183824	0.161765	0.213235
CCNA_03333	0.143939	0.272727	0.19697	0.151515	0.234848
lovK	0.0690476	0.304762	0.247619	0.161905	0.216667
lovR	0.0761589	0.281457	0.228477	0.172185	0.241722
CCNA_00535	0.0861244	0.344498	0.229665	0.129187	0.210526
CCNA_00709	0.126984	0.269841	0.222222	0.190476	0.190476
nepR	0.114523	0.346129	0.180422	0.159309	0.199616
CCNA_00591	0.079558	0.209945	0.258564	0.241989	0.209945
CCNA_03733	0.175657	0.224066	0.236515	0.186722	0.17704
CCNA_00282	0.126761	0.34507	0.140845	0.147887	0.239437
CCNA_03674	0.139867	0.24548	0.164605	0.186489	0.263559
phyR	0.092233	0.337864	0.180583	0.135922	0.253398
CCNA_01247	0.0930233	0.209302	0.139535	0.302326	0.255814
CCNA_R0081	0.126464	0.299766	0.203747	0.142857	0.227166
CCNA_03669	0.117647	0.333333	0.176471	0.117647	0.254902
CCNA_03668	0.155556	0.155556	0.155556	0.177778	0.355556
CCNA_02466	0.355972	0.264637	0.12178	0.107728	0.149883
CCNA_01236	0.173913	0.355072	0.0869565	0.108696	0.275362
CCNA_01237	0.184	0.336	0.136	0.088	0.256
CCNA_01344	0.206897	0.231527	0.221675	0.147783	0.192118
sigU	0.0773639	0.386819	0.17765	0.126074	0.232092
CCNA_02632	0.109677	0.258065	0.180645	0.212903	0.23871
sigT	0.111663	0.37469	0.166253	0.156328	0.191067
CCNA_00987	0.212996	0.271961	0.172082	0.120337	0.222623
CCNA_00982	0.185301	0.157154	0.258796	0.203284	0.195465
pssZ	0.353035	0.221406	0.126837	0.147284	0.151438
CCNA_00162	0.296184	0.22889	0.192103	0.144571	0.138252
CCNA_00201	0.113821	0.227642	0.165312	0.200542	0.292683
CCNA_01418	0.262248	0.298271	0.151297	0.110951	0.177233
CCNA_00592	0.0674551	0.172142	0.280333	0.231275	0.248795
CCNA_03006	0.0353893	0.131446	0.172902	0.347826	0.312437
CCNA_00594	0.102941	0.16636	0.229779	0.25	0.250919
CCNA_00590	0.0960699	0.218341	0.257642	0.227074	0.200873
CCNA_00593	0.13242	0.180365	0.23516	0.246575	0.205479
phyK	0.109589	0.342466	0.212329	0.123288	0.212329

## Sheet: all
CCNA	Expression F_SW	Expression F_ST	Expression F_EPD	Expression F_PD	Expression F_LPD
CCNA_02193	0.164983	0.242424	0.232323	0.164983	0.195286
CCNA_02190	0.105455	0.269091	0.218182	0.221818	0.185455
CCNA_02191	0.476529	0.3101	0.0753912	0.0640114	0.0739687
CCNA_02196	0.136095	0.254438	0.254438	0.171598	0.183432
CCNA_02197	0.168724	0.238683	0.1893	0.185185	0.218107
CCNA_02194	0.218769	0.187073	0.146053	0.233686	0.214419
CCNA_02195	0.242424	0.242424	0.121212	0.19697	0.19697
CCNA_02198	0.156126	0.274704	0.185771	0.187747	0.195652
CCNA_02199	0.180328	0.213115	0.229508	0.196721	0.180328
CCNA_01885	0.176471	0.235294	0.235294	0.117647	0.235294
CCNA_01884	0.142857	0.238095	0.190476	0.190476	0.238095
CCNA_02200	0.0229358	0.0856269	0.0810398	0.531346	0.279052
CCNA_01886	0.121951	0.268293	0.243902	0.195122	0.170732
CCNA_02206	0.0174672	0.353712	0.257642	0.161572	0.209607
CCNA_02207	0.143035	0.2301	0.180348	0.216418	0.2301
CCNA_01883	0.153846	0.230769	0.230769	0.153846	0.230769
CCNA_01882	0	0.5	0.25	0.25	0
CCNA_02754	0.0433673	0.257653	0.204082	0.237245	0.257653
CCNA_02755	0.111111	0.216374	0.280702	0.169591	0.222222
CCNA_02208	0.0851613	0.287742	0.221935	0.20129	0.203871
CCNA_02209	0	0.4	0.1	0.2	0.3
CCNA_01889	0.153846	0.153846	0.230769	0.230769	0.230769
CCNA_01888	0.153846	0.261538	0.2	0.153846	0.230769
CCNA_02752	0.097561	0.2	0.214634	0.22439	0.263415
CCNA_02753	0.151515	0.212121	0.212121	0.242424	0.181818
CCNA_02879	0.222222	0.188889	0.211111	0.166667	0.211111
CCNA_00962	0.162679	0.26555	0.282297	0.126794	0.162679
CCNA_01387	0.282443	0.221374	0.19084	0.160305	0.145038
CCNA_01956	0.213166	0.210031	0.194357	0.188088	0.194357
CCNA_01955	0.151985	0.214908	0.217812	0.181026	0.234269
CCNA_01954	0.1635	0.181347	0.234312	0.170409	0.250432
CCNA_01952	0.126374	0.0412088	0.151099	0.42033	0.260989
CCNA_02688	0.472441	0.11811	0.0787402	0.173228	0.15748
CCNA_01950	0.213889	0.272222	0.208333	0.151389	0.154167
CCNA_02686	0.163934	0.229508	0.131148	0.229508	0.245902
CCNA_02687	0.385542	0.13253	0.0843373	0.240964	0.156627
CCNA_02684	0.315789	0.192982	0.175439	0.157895	0.157895
CCNA_02685	0.214286	0.25	0.107143	0.214286	0.214286
CCNA_02682	0.222222	0.222222	0.185185	0.185185	0.185185
CCNA_02683	0.3125	0.166667	0.166667	0.1875	0.166667
CCNA_01959	0.206381	0.184447	0.244267	0.192423	0.172483
CCNA_02681	0.248804	0.196172	0.162679	0.191388	0.200957
CCNA_01089	0.0737327	0.170507	0.271889	0.211982	0.271889
CCNA_01088	0.125407	0.166124	0.228013	0.229642	0.250814
CCNA_01085	0.131092	0.227731	0.271429	0.186134	0.183613
CCNA_01084	0.0850425	0.196598	0.258129	0.249625	0.210605
CCNA_01087	0.0376344	0.0860215	0.392473	0.290323	0.193548
CCNA_01081	0.0353982	0.318584	0.221239	0.176991	0.247788
CCNA_01080	0.0887097	0.16129	0.266129	0.201613	0.282258
CCNA_01083	0.0829752	0.203636	0.250248	0.22876	0.23438
CCNA_01082	0.166667	0.166667	0.166667	0.166667	0.333333
CCNA_03810	0.173469	0.173469	0.278912	0.187075	0.187075
CCNA_03811	0.139785	0.225806	0.268817	0.182796	0.182796
CCNA_03812	0.148148	0.296296	0.222222	0.148148	0.185185
CCNA_01165	0.0349345	0.331878	0.270742	0.19214	0.170306
CCNA_03814	0.128571	0.271429	0.214286	0.171429	0.214286
CCNA_03815	0.154545	0.245455	0.190909	0.218182	0.190909
CCNA_03816	0.144124	0.250554	0.179601	0.201774	0.223947
CCNA_03817	0.154882	0.23569	0.212121	0.188552	0.208754
CCNA_03818	0.106061	0.227273	0.30303	0.181818	0.181818
CCNA_02202	0.0769231	0.258242	0.192308	0.203297	0.269231
CCNA_02203	0.133531	0.200297	0.188427	0.243323	0.234421
CCNA_02201	0.142857	0.265306	0.183673	0.173469	0.234694
CCNA_01388	0.113772	0.215569	0.155689	0.221557	0.293413
CCNA_02758	0.102041	0.193878	0.285714	0.204082	0.214286
CCNA_02876	0.05	0.1	0.4	0.25	0.2
abfA	0.140969	0.180617	0.198238	0.23348	0.246696
CCNA_02759	0.234875	0.192171	0.19573	0.181495	0.19573
CCNA_00918	0.269103	0.192691	0.189369	0.162791	0.186047
CCNA_00919	0.201231	0.160099	0.275829	0.187304	0.175537
CCNA_02204	0.04053	0.293496	0.232182	0.204555	0.229237
tipN	0.165803	0.219344	0.172712	0.207254	0.234888
CCNA_00910	0.153153	0.216216	0.18018	0.225225	0.225225
CCNA_00911	0.126761	0.211268	0.253521	0.183099	0.225352
CCNA_00912	0.16092	0.252874	0.218391	0.172414	0.195402
CCNA_00913	0	0.352941	0.529412	0	0.117647
CCNA_00914	0.15	0.183333	0.2	0.216667	0.25
CCNA_00915	0.0862069	0.310345	0.241379	0.137931	0.224138
tipF	0.0652504	0.339909	0.200303	0.171472	0.223065
CCNA_R0006	0	0.296296	0.222222	0.0740741	0.407407
CCNA_03444	0.0228873	0.121479	0.272887	0.314261	0.268486
CCNA_03822	0.164179	0.179104	0.208955	0.208955	0.238806
tolB	0.155125	0.216066	0.232687	0.209141	0.186981
tolA	0.154412	0.25	0.235294	0.205882	0.154412
CCNA_02756	0.187368	0.183158	0.197895	0.204211	0.227368
CCNA_03964	0.167364	0.179916	0.142259	0.223849	0.286611
cheW	0.133333	0.1	0.3	0.3	0.166667
CCNA_03966	0.106927	0.211065	0.212924	0.23152	0.237564
cheU	0.0488281	0.0371094	0.228516	0.492188	0.193359
CCNA_03960	0.101449	0.318841	0.304348	0.144928	0.130435
CCNA_03961	0.115156	0.222936	0.270997	0.151083	0.239829
CCNA_03962	0.102954	0.249174	0.210516	0.240761	0.196595
CCNA_03963	0.0198428	0.321977	0.272557	0.146762	0.238862
CCNA_02750	0.22113	0.213759	0.181818	0.191646	0.191646
CCNA_00081	0.141092	0.0669413	0.15654	0.393409	0.242019
CCNA_03968	0.122105	0.258947	0.185263	0.187368	0.246316
CCNA_03969	0.113739	0.026464	0.247748	0.399775	0.212275
CCNA_R0007	0.299678	0.125034	0.252428	0.161508	0.161352
cheY	0.0967742	0.0752688	0.11828	0.494624	0.215054
cheD	0.0452781	0.0336352	0.232859	0.483829	0.204398
cheE	0.0750308	0.0492005	0.254613	0.400984	0.220172
CCNA_01547	0.246753	0.220779	0.161039	0.187013	0.184416
CCNA_R0154	0.195027	0.139932	0.247684	0.141394	0.275963
CCNA_02967	0.0703125	0.171875	0.210938	0.242188	0.304688
CCNA_02966	0.14321	0.171605	0.262963	0.202469	0.219753
CCNA_02965	0.179487	0.192308	0.205128	0.217949	0.205128
CCNA_02964	0.119427	0.289809	0.237261	0.167197	0.186306
CCNA_02963	0.0714286	0.173469	0.22449	0.265306	0.265306
CCNA_00869	0.0467091	0.322718	0.26327	0.178344	0.18896
CCNA_02961	0.0415094	0.045283	0.271698	0.426415	0.215094
CCNA_02960	0.222222	0.166667	0.166667	0.222222	0.222222
CCNA_00867	0.236915	0.225895	0.15978	0.176309	0.201102
CCNA_00861	0.0126183	0.290221	0.264984	0.236593	0.195584
CCNA_02969	0.224138	0.172414	0.137931	0.241379	0.224138
kidO	0.074928	0.0144092	0.132565	0.481268	0.29683
glk	0.151378	0.227067	0.172306	0.230555	0.218696
CCNA_02564	0.0731707	0.195122	0.182927	0.292683	0.256098
rpsQ	0.233103	0.201353	0.226976	0.17666	0.161908
CCNA_00226	0.0588235	0.20915	0.287582	0.176471	0.267974
gpsA	0.164384	0.30137	0.191781	0.164384	0.178082
cspD	0.0456376	0.18255	0.18255	0.339597	0.249664
gltB	0.00725163	0.271936	0.282814	0.194344	0.243655
cspB	0.154976	0.0450747	0.58825	0.103317	0.108382
cspC	0.244102	0.210649	0.187057	0.189111	0.169081
cspA	0.31936	0.118394	0.228066	0.162686	0.171494
CCNA_00227	0.0434783	0.293478	0.25	0.195652	0.217391
CCNA_01542	0.0104712	0.329843	0.324607	0.167539	0.167539
CCNA_00266	0.133333	0.233333	0.2	0.2	0.233333
CCNA_00267	0.146758	0.266212	0.204778	0.194539	0.187713
CCNA_00264	0.219029	0.223984	0.20218	0.163528	0.191278
CCNA_00265	0.249216	0.172414	0.213166	0.169279	0.195925
CCNA_00262	0.172043	0.333333	0.139785	0.150538	0.204301
CCNA_00263	0.125714	0.205714	0.222857	0.228571	0.217143
CCNA_00260	0.038835	0.300971	0.184466	0.271845	0.203883
CCNA_00261	0.151758	0.366711	0.184691	0.127281	0.169559
rsaD	0.184049	0.19862	0.207822	0.203988	0.205521
rsaE	0.150767	0.168779	0.242161	0.200801	0.237492
CCNA_01543	0.185567	0.247423	0.164948	0.195876	0.206186
CCNA_00269	0.157923	0.2761	0.215156	0.174881	0.175941
CCNA_01659	0.271505	0.215054	0.172043	0.16129	0.180108
CCNA_00225	0.133106	0.372014	0.201365	0.116041	0.177474
CCNA_02689	0.650602	0.0843373	0.060241	0.108434	0.0963855
CCNA_01792	0.248923	0.21042	0.151231	0.189062	0.200364
CCNA_00129	0.277027	0.209459	0.165541	0.192568	0.155405
CCNA_00128	0.26045	0.21329	0.172562	0.166131	0.187567
CCNA_00125	0.0804598	0.252874	0.275862	0.172414	0.218391
CCNA_00124	0.0996904	0.214861	0.276161	0.188854	0.220433
CCNA_00127	0.101695	0.145763	0.169492	0.338983	0.244068
CCNA_00126	0.0310881	0.264249	0.310881	0.170984	0.222798
CCNA_00121	0.10101	0.222222	0.20202	0.212121	0.262626
CCNA_00120	0.16129	0.212903	0.206452	0.2	0.219355
CCNA_00123	0.153846	0.208791	0.208791	0.208791	0.21978
CCNA_00122	0.0792208	0.250649	0.214286	0.214286	0.241558
CCNA_01434	0.141104	0.211656	0.162577	0.233129	0.251534
CCNA_01435	0.153209	0.180124	0.196687	0.229814	0.240166
CCNA_01437	0.144578	0.204819	0.210843	0.271084	0.168675
CCNA_01430	0.189504	0.206997	0.186589	0.206025	0.210884
CCNA_01431	0.157221	0.228519	0.21755	0.162706	0.234004
CCNA_01432	0.184919	0.256732	0.193896	0.172352	0.192101
rpoA	0.248511	0.183984	0.207478	0.18994	0.170086
CCNA_01438	0.169734	0.182004	0.202454	0.216769	0.229039
CCNA_01439	0.188679	0.207547	0.188679	0.198113	0.216981
CCNA_02989	0.2	0.2	0.2	0.2	0.2
CCNA_02988	0.0833333	0.194444	0.236111	0.25	0.236111
era	0.282569	0.218349	0.177982	0.148624	0.172477
CCNA_01651	0.0708245	0.29704	0.27167	0.171247	0.189218
CCNA_02981	0.0666667	0.133333	0.4	0.233333	0.166667
CCNA_02980	0.119658	0.205128	0.25641	0.213675	0.205128
CCNA_02983	0.111702	0.207447	0.271277	0.218085	0.191489
CCNA_02982	0.0416667	0.0416667	0.0208333	0.5625	0.333333
CCNA_02985	0.131579	0.243421	0.276316	0.184211	0.164474
CCNA_02984	0.120253	0.208861	0.316456	0.202532	0.151899
CCNA_02987	0.0714286	0.142857	0.333333	0.190476	0.261905
CCNA_02986	0.0794224	0.32491	0.187726	0.231047	0.176895
CCNA_00422	0.166667	0.214286	0.15873	0.22619	0.234127
fzlC	0.117647	0.294118	0.215686	0.176471	0.196078
CCNA_R0174	0.0786517	0.195097	0.231869	0.243105	0.251277
CCNA_00696	0.114286	0.228571	0.171429	0.228571	0.257143
CCNA_00695	0.123894	0.238938	0.159292	0.247788	0.230088
CCNA_00694	0.0729167	0.385417	0.166667	0.177083	0.197917
CCNA_00693	0.0285714	0.485714	0.2	0.171429	0.114286
CCNA_00692	0.0326087	0.0326087	0.217391	0.48913	0.228261
CCNA_00691	0.219188	0.290037	0.256089	0.128413	0.106273
CCNA_00690	0.2356	0.143634	0.237824	0.192336	0.190606
CCNA_03744	0.171271	0.270718	0.237569	0.143646	0.176796
CCNA_00089	0.0897436	0.0307692	0.158974	0.471795	0.248718
CCNA_00682	0.0714286	0.357143	0.285714	0.214286	0.0714286
CCNA_00699	0.253171	0.149512	0.206098	0.183902	0.207317
CCNA_00698	0.177778	0.111111	0.266667	0.177778	0.266667
CCNA_01508	0.143885	0.239808	0.191847	0.194245	0.230216
CCNA_00050	0.151961	0.181373	0.259804	0.186275	0.220588
CCNA_00052	0.225519	0.20178	0.219585	0.183976	0.169139
CCNA_00055	0.0734898	0.247403	0.33359	0.158138	0.18738
CCNA_00054	0.240591	0.201613	0.208333	0.163978	0.185484
CCNA_00057	0.203947	0.243421	0.197368	0.157895	0.197368
CCNA_00056	0.169492	0.237288	0.245763	0.161017	0.186441
CCNA_01500	0.13354	0.232919	0.242236	0.192547	0.198758
CCNA_00058	0.227941	0.213235	0.220588	0.161765	0.176471
CCNA_01502	0.13242	0.251142	0.219178	0.200913	0.196347
CCNA_01503	0.166667	0.166667	0.166667	0.333333	0.166667
CCNA_01505	0.192568	0.217905	0.321791	0.110642	0.157095
CCNA_01506	0.152381	0.247619	0.228571	0.180952	0.190476
CCNA_01507	0.194444	0.277778	0.180556	0.166667	0.180556
cztR	0.125	0.166667	0.291667	0.208333	0.208333
CCNA_01499	0.0789474	0.210526	0.131579	0.315789	0.263158
hfsJ	0.267773	0.0260664	0.0118483	0.336493	0.35782
hfsI	0.0703125	0.0234375	0.265625	0.46875	0.171875
hfsH	0.144444	0.0222222	0.0777778	0.444444	0.311111
hfsG	0.142857	0.025974	0.103896	0.415584	0.311688
hfsF	0.116279	0.0348837	0.139535	0.383721	0.325581
hfsE	0.0931034	0.0275862	0.172414	0.406897	0.3
hfsD	0.023622	0.0472441	0.503937	0.299213	0.125984
hfsC	0.027027	0.288288	0.306306	0.216216	0.162162
hfsB	0.00826446	0.268595	0.301653	0.22314	0.198347
hfsA	0.00813008	0.0142276	0.457317	0.388211	0.132114
CCNA_01556	0.0736579	0.220974	0.258427	0.219725	0.227216
CCNA_03561	0.21957	0.176611	0.205728	0.197613	0.200477
CCNA_03563	0.25641	0.212751	0.190575	0.176022	0.164241
CCNA_03564	0.209524	0.228571	0.171429	0.209524	0.180952
CCNA_03565	0.13253	0.216867	0.289157	0.168675	0.192771
CCNA_R0129	0.152012	0.324896	0.152744	0.164096	0.206253
CCNA_R0128	0.0496183	0.335878	0.21374	0.0954198	0.305344
CCNA_R0127	0.176425	0.205701	0.231125	0.212635	0.174114
CCNA_R0126	0.113402	0.257732	0.247423	0.185567	0.195876
CCNA_R0125	0.0833333	0.333333	0.25	0	0.333333
CCNA_R0124	0.0798611	0.152778	0.25	0.270833	0.246528
CCNA_R0123	0.126316	0.463158	0.115789	0.136842	0.157895
CCNA_R0122	0.163636	0.290909	0.127273	0.181818	0.236364
CCNA_R0121	0.204641	0.259494	0.122363	0.21097	0.202532
CCNA_R0120	0.28642	0.148148	0.165432	0.202469	0.197531
CCNA_03762	0.355372	0.173554	0.157025	0.198347	0.115702
CCNA_03763	0.122222	0.211111	0.233333	0.211111	0.222222
CCNA_00589	0.0962389	0.150442	0.271018	0.255531	0.22677
CCNA_00588	0.2	0.15	0.2	0.3	0.15
CCNA_03766	0.262136	0.21068	0.22233	0.136893	0.167961
CCNA_03767	0.280491	0.201228	0.193692	0.143176	0.181412
CCNA_03764	0.208163	0.236735	0.204082	0.165306	0.185714
CCNA_03765	0.18732	0.178674	0.259366	0.178674	0.195965
CCNA_00583	0.0978261	0.184783	0.271739	0.206522	0.23913
CCNA_00582	0.0924488	0.184192	0.215949	0.248412	0.258998
CCNA_00859	0.111765	0.0882353	0.205882	0.3	0.294118
CCNA_00580	0.0666667	0.2	0.233333	0.3	0.2
CCNA_00587	0.0714286	0.142857	0.0714286	0.214286	0.5
CCNA_00586	0.138889	0.277778	0.194444	0.166667	0.222222
CCNA_00585	0.0597015	0.164179	0.238806	0.288557	0.248756
CCNA_00366	0.106033	0.33638	0.226691	0.146252	0.184644
CCNA_01558	0.120321	0.224599	0.221925	0.224599	0.208556
CCNA_00364	0.280185	0.217793	0.180243	0.156557	0.165222
CCNA_01618	0.0923913	0.277174	0.271739	0.163043	0.195652
CCNA_01619	0.0963855	0.28012	0.28012	0.153614	0.189759
CCNA_03368	0.191781	0.191781	0.191781	0.315068	0.109589
CCNA_03369	0.117424	0.223485	0.1875	0.210227	0.261364
CCNA_01614	0.174194	0.206452	0.264516	0.167742	0.187097
CCNA_01615	0.169399	0.256831	0.240437	0.15847	0.174863
CCNA_03364	0.233161	0.440415	0.160622	0.0829016	0.0829016
CCNA_01617	0.131579	0.289474	0.25	0.144737	0.184211
CCNA_01610	0.0165913	0.239316	0.252891	0.223228	0.267974
CCNA_01611	0.0757576	0.318182	0.227273	0.181818	0.19697
CCNA_03360	0.225105	0.19425	0.234923	0.150771	0.194951
cheAII	0.0714286	0.0714286	0.214286	0.428571	0.214286
dnaA	0.258703	0.287515	0.103842	0.151261	0.198679
CCNA_02369	0.246528	0.680556	0.0381944	0.0138889	0.0208333
CCNA_02368	0.244939	0.676113	0.0384615	0.0222672	0.0182186
CCNA_02365	0.270142	0.592417	0.0663507	0.042654	0.028436
CCNA_02364	0.0413793	0.117241	0.386207	0.327586	0.127586
CCNA_02367	0.39645	0.313609	0.112426	0.0769231	0.100592
creS	0.0492958	0.414487	0.192153	0.130785	0.21328
CCNA_02361	0.429112	0.0907372	0.0831758	0.219282	0.177694
CCNA_02360	0.390351	0.0833333	0.0833333	0.241228	0.201754
CCNA_02363	0.0202507	0.420444	0.243973	0.135969	0.179364
CCNA_02362	0.250689	0.217631	0.179063	0.168044	0.184573
CCNA_R0013	0.0263158	0.131579	0.236842	0.184211	0.421053
CCNA_R0012	0.141749	0.214692	0.213658	0.213658	0.216244
CCNA_R0011	0.142129	0.220071	0.20377	0.222618	0.211411
CCNA_R0010	0.162669	0.160687	0.218102	0.200007	0.258534
CCNA_R0017	0.108609	0.251656	0.161589	0.223841	0.254305
CCNA_R0016	0.0719682	0.273658	0.194135	0.249205	0.211034
CCNA_R0015	0.185678	0.238274	0.156807	0.19432	0.224921
CCNA_R0014	0.374384	0.369458	0.0738916	0.08867	0.0935961
fadJ	0.0659026	0.143266	0.206304	0.26361	0.320917
CCNA_R0019	0.743428	0.0525739	0.037605	0.0881709	0.078222
CCNA_R0018	0.0609756	0.0731707	0.207317	0.219512	0.439024
CCNA_02103	0.116279	0.0930233	0.162791	0.395349	0.232558
CCNA_03108	0.30826	0.171976	0.139233	0.223599	0.156932
CCNA_02005	0.11583	0.359073	0.266409	0.119691	0.138996
imuA	0.0540541	0.27027	0.324324	0.162162	0.189189
ompW	0.0190822	0.0667878	0.0699682	0.692867	0.151295
flhA	0.015748	0.152231	0.472441	0.217848	0.141732
CCNA_02006	0.185654	0.242616	0.21308	0.177215	0.181435
CCNA_00479	0.03125	0.1875	0.1875	0.34375	0.25
CCNA_00478	0.091954	0.226054	0.229885	0.226054	0.226054
CCNA_00477	0.128205	0.153846	0.282051	0.153846	0.282051
CCNA_00476	0.333333	0	0.333333	0.333333	0
CCNA_02007	0.16	0.234717	0.241509	0.175094	0.188679
CCNA_00473	0.0704225	0.126761	0.338028	0.225352	0.239437
CCNA_00472	0.285978	0.202583	0.207749	0.154613	0.149077
CCNA_00471	0.210958	0.235277	0.200996	0.146499	0.20627
CCNA_00470	0.233594	0.177002	0.217339	0.192053	0.180012
CCNA_00679	0.151515	0.212121	0.212121	0.181818	0.242424
CCNA_00678	0.272737	0.184486	0.202287	0.183299	0.157191
CCNA_02569	0.143411	0.228682	0.178295	0.236434	0.213178
CCNA_02568	0.205882	0.205882	0.205882	0.161765	0.220588
rcdA	0.376902	0.120332	0.145228	0.190871	0.166667
CCNA_02009	0.146781	0.199142	0.262661	0.184549	0.206867
CCNA_00671	0.218	0.19	0.258	0.156	0.178
CCNA_00670	0.210938	0.197917	0.239583	0.177083	0.174479
CCNA_00673	0.153846	0.25641	0.179487	0.205128	0.205128
CCNA_00672	0.133333	0.266667	0.2	0.266667	0.133333
CCNA_00675	0.088764	0.116854	0.323596	0.224719	0.246067
CCNA_00674	0.151515	0.121212	0.212121	0.272727	0.242424
CCNA_00677	0.23847	0.233491	0.176625	0.190252	0.161164
CCNA_00676	0.213084	0.172586	0.221184	0.21433	0.178816
CCNA_02181	0.268908	0.229692	0.193277	0.140056	0.168067
CCNA_02180	0.194444	0.205556	0.161111	0.233333	0.205556
CCNA_02182	0.195876	0.268041	0.180412	0.154639	0.201031
CCNA_02185	0.0117302	0.243402	0.164956	0.283724	0.296188
CCNA_02184	0.181818	0.345455	0.127273	0.2	0.145455
CCNA_02186	0.0393443	0.257377	0.17623	0.285246	0.241803
CCNA_02189	0.140449	0.258427	0.196629	0.202247	0.202247
CCNA_02188	0.0923594	0.279597	0.196474	0.191436	0.240134
gcvT	0.436082	0.386598	0.0597938	0.0628866	0.0546392
CCNA_02211	0.137592	0.243243	0.208845	0.201474	0.208845
CCNA_02210	0.115756	0.244373	0.244373	0.18328	0.212219
CCNA_02213	0.225806	0.16129	0.179724	0.202765	0.230415
CCNA_02212	0.0784314	0.156863	0.156863	0.27451	0.333333
CCNA_02215	0.0840708	0.159292	0.150442	0.309735	0.29646
CCNA_02214	0.119874	0.223975	0.205047	0.214511	0.236593
CCNA_02217	0.125	0.21875	0.174279	0.253606	0.228365
CCNA_02216	0.0662526	0.153209	0.138716	0.322981	0.318841
CCNA_02219	0.223958	0.223958	0.208333	0.161458	0.182292
sidA	0.0233918	0.188596	0.359649	0.25731	0.171053
CCNA_02749	0.227766	0.21692	0.182213	0.208243	0.164859
CCNA_02748	0.203947	0.210526	0.282895	0.167763	0.134868
CCNA_03616	0.190476	0.190476	0.238095	0.190476	0.190476
CCNA_03617	0.126761	0.225352	0.197183	0.197183	0.253521
CCNA_03614	0.182266	0.182266	0.206897	0.211823	0.216749
CCNA_03615	0.206897	0.172414	0.172414	0.241379	0.206897
CCNA_01212	0.168168	0.222222	0.21021	0.183183	0.216216
CCNA_R0116	0.0222222	0.291358	0.42963	0.0987654	0.158025
ftsE	0.0742754	0.217391	0.306159	0.213768	0.188406
ftsB	0.210681	0.0748239	0.253228	0.296948	0.164319
ftsA	0.0440252	0.0943396	0.314465	0.371069	0.176101
CCNA_R0117	0.122966	0.205244	0.271248	0.166365	0.234177
CCNA_03582	0.137755	0.438776	0.214286	0.0969388	0.112245
ftsN	0.0453901	0.310638	0.211348	0.228369	0.204255
CCNA_03580	0.0743802	0.206612	0.31405	0.22314	0.181818
ftsL	0.0837321	0.076555	0.318182	0.373206	0.148325
CCNA_03586	0.111111	0.037037	0.2	0.42963	0.222222
CCNA_03587	0.166667	0.283951	0.209877	0.123457	0.216049
zwf	0.125593	0.187874	0.200454	0.248711	0.237369
ftsH	0.17672	0.197961	0.220051	0.203908	0.201359
ftsW	0.0303951	0.0455927	0.392097	0.389058	0.142857
CCNA_R0115	0.193332	0.269392	0.140057	0.215949	0.18127
CCNA_02699	0.616667	0.1	0.0833333	0.116667	0.0833333
CCNA_02698	0.366379	0.159483	0.146552	0.168103	0.159483
ftsQ	0.0551378	0.0426065	0.333333	0.380952	0.18797
CCNA_02695	0.1875	0.234375	0.140625	0.171875	0.265625
CCNA_02694	0.4	0.2	0	0.2	0.2
CCNA_02697	0.468085	0.12766	0.0851064	0.191489	0.12766
CCNA_02696	0.361111	0.166667	0.0555556	0.222222	0.194444
CCNA_02691	0.364486	0.168224	0.149533	0.158879	0.158879
ftsZ	0.0130984	0.364849	0.258633	0.163849	0.199571
ftsY	0.372978	0.226451	0.132255	0.0894386	0.178877
ftsX	0.0666667	0.266667	0.216667	0.225	0.225
CCNA_R0110	0.157895	0.210526	0.263158	0.105263	0.263158
CCNA_01716	0.124654	0.180055	0.221607	0.218837	0.254848
CCNA_02959	0.111111	0.222222	0.277778	0.222222	0.166667
xylB	0.0967742	0.0967742	0.193548	0.387097	0.225806
CCNA_R0111	0.144928	0.173913	0.275362	0.224638	0.181159
cheYI	0.0278436	0.0177725	0.23045	0.549763	0.174171
CCNA_03807	0.125	0.18838	0.265845	0.211268	0.209507
CCNA_03806	0.112245	0.214286	0.244898	0.22449	0.204082
chvI	0.0881637	0.170969	0.391135	0.145641	0.204092
CCNA_03804	0.0935673	0.140351	0.152047	0.163743	0.450292
CCNA_03803	0.0679245	0.0226415	0.169811	0.513208	0.226415
CCNA_01989	0.167166	0.231276	0.245057	0.154584	0.201917
CCNA_03801	0.136752	0.25641	0.213675	0.188034	0.205128
CCNA_03800	0.229947	0.181818	0.227273	0.173797	0.187166
CCNA_01984	0.09375	0.0625	0.34375	0.3125	0.1875
CCNA_01985	0.142857	0.0285714	0.342857	0.314286	0.171429
CCNA_02296	0.152778	0.239583	0.180556	0.177083	0.25
CCNA_01980	0.144737	0.223684	0.197368	0.210526	0.223684
CCNA_01981	0.156863	0.235294	0.196078	0.196078	0.215686
CCNA_01982	0.231362	0.218509	0.18509	0.182519	0.182519
CCNA_01983	0.238931	0.176836	0.169546	0.216253	0.198434
CCNA_03439	0.136564	0.237885	0.277533	0.154185	0.193833
ligA	0.0518519	0.348148	0.259259	0.148148	0.192593
CCNA_01554	0.15625	0.21875	0.21875	0.1875	0.21875
smc	0.0898876	0.224719	0.280899	0.191011	0.213483
CCNA_00909	0.185484	0.25	0.185484	0.177419	0.201613
prfC	0.255952	0.202381	0.172619	0.178571	0.190476
CCNA_00907	0.186916	0.17757	0.252336	0.17757	0.205607
CCNA_00906	0.193277	0.184874	0.201681	0.226891	0.193277
CCNA_00905	0.190476	0.238095	0.190476	0.238095	0.142857
spdR	0.0652174	0.224638	0.205314	0.246377	0.258454
CCNA_00901	0.0471698	0.367925	0.160377	0.198113	0.226415
CCNA_00900	0.163265	0.0204082	0.0816327	0.489796	0.244898
CCNA_01184	0.13271	0.278505	0.235514	0.179439	0.173832
CCNA_01185	0.615385	0.0961538	0.134615	0.0961538	0.0576923
CCNA_01186	0.200357	0.0245739	0.0273484	0.439952	0.307769
CCNA_01187	0.211864	0.158192	0.214689	0.19774	0.217514
CCNA_01180	0.0826087	0.265217	0.234783	0.204348	0.213043
CCNA_01181	0.277778	0.188406	0.147343	0.205314	0.181159
CCNA_01182	0.109756	0.199187	0.256098	0.219512	0.215447
CCNA_01183	0.182156	0.234201	0.228005	0.180917	0.174721
CCNA_03973	0.042471	0.250965	0.335907	0.274131	0.0965251
CCNA_03972	0.101546	0.229896	0.156077	0.226209	0.286271
CCNA_03971	0.0194884	0.418544	0.301462	0.105816	0.154689
CCNA_03970	0.392157	0.235294	0.0882353	0.107843	0.176471
CCNA_03977	0.12766	0.212766	0.255319	0.170213	0.234043
CCNA_01189	0.204545	0.193182	0.181818	0.204545	0.215909
CCNA_03975	0.552632	0.0964912	0.0964912	0.135965	0.118421
CCNA_03974	0.108059	0.227106	0.197802	0.223443	0.24359
CCNA_R0030	0.113969	0.218663	0.204371	0.239235	0.223763
CCNA_01597	0.257642	0.240175	0.165939	0.179039	0.157205
CCNA_01570	0.0909091	0.227273	0.181818	0.227273	0.272727
moaD	0.0769231	0.353846	0.138462	0.2	0.230769
fixT	0.0196078	0.137255	0.107843	0.509804	0.22549
sdhC	0.135954	0.235825	0.210052	0.20683	0.21134
trwC	0.125	0.125	0.25	0.25	0.25
trwB	0.2	0.3	0.2	0.2	0.1
fixL	0.145161	0.21371	0.165323	0.322581	0.153226
fixK	0.0126235	0.0987925	0.134468	0.402854	0.351262
fixJ	0.120497	0.227329	0.186335	0.247205	0.218634
fixI	0.275	0.15	0.0125	0.5375	0.025
fixH	0.157509	0.201465	0.032967	0.567766	0.040293
fixG	0.118033	0.186885	0.0459016	0.593443	0.0557377
CCNA_01593	0.189024	0.231707	0.198171	0.182927	0.198171
CCNA_R0033	0.238305	0.228814	0.206441	0.138305	0.188136
glyS	0.164654	0.236004	0.208562	0.190999	0.19978
glyQ	0.184025	0.226312	0.196554	0.188724	0.204385
CCNA_01573	0.166667	0.277778	0.166667	0.277778	0.111111
CCNA_01700	0.020794	0.128544	0.132325	0.304348	0.413989
CCNA_00100	0.125937	0.26087	0.217391	0.169415	0.226387
CCNA_00873	0.142857	0.178571	0.214286	0.25	0.214286
CCNA_00872	0.0739065	0.28356	0.25641	0.167421	0.218703
CCNA_00871	0.0818182	0.372727	0.172727	0.172727	0.2
CCNA_00870	0.125	0.298077	0.182692	0.211538	0.182692
CCNA_00877	0.158986	0.186636	0.218894	0.205069	0.230415
CCNA_00876	0.144631	0.0482104	0.168006	0.368152	0.271001
CCNA_00875	0.133333	0.0814815	0.162963	0.37037	0.251852
CCNA_01840	0.0699301	0.118881	0.34965	0.27972	0.181818
CCNA_00879	0.105263	0.178947	0.273684	0.189474	0.252632
CCNA_00878	0.197719	0.149556	0.290241	0.115336	0.247148
CCNA_00635	0.0568862	0.203593	0.296407	0.269461	0.173653
CCNA_01058	0.184727	0.310545	0.206545	0.162909	0.135273
CCNA_01572	0.148148	0.259259	0.222222	0.148148	0.222222
CCNA_00852	0.186047	0.232558	0.20155	0.217054	0.162791
CCNA_00634	0.102273	0.136364	0.295455	0.261364	0.204545
CCNA_01052	0.0588235	0.220588	0.205882	0.235294	0.279412
CCNA_01053	0.0588235	0.176471	0.235294	0.294118	0.235294
CCNA_01050	0.234432	0.212454	0.208791	0.157509	0.186813
CCNA_01051	0.0873786	0.145631	0.262136	0.271845	0.23301
CCNA_01056	0.138743	0.269634	0.196335	0.191099	0.204188
CCNA_01057	0.103767	0.230988	0.234542	0.206112	0.224591
CCNA_01054	0.105263	0.197368	0.197368	0.236842	0.263158
CCNA_01055	0.122807	0.254386	0.210526	0.201754	0.210526
CCNA_01219	0.121212	0.30303	0.252525	0.161616	0.161616
exbB	0.118162	0.199208	0.243369	0.21422	0.225041
exbD	0.0881703	0.215643	0.273612	0.215736	0.206839
tolR	0.191283	0.205811	0.244552	0.181598	0.176755
CCNA_01728	0.173913	0.220497	0.180124	0.208075	0.217391
CCNA_R0035	0.204689	0.219495	0.194977	0.181542	0.199297
CCNA_02953	0.26087	0.0869565	0.391304	0.0869565	0.173913
tolQ	0.165468	0.22446	0.251799	0.166906	0.191367
CCNA_01729	0.214689	0.259887	0.214689	0.175141	0.135593
CCNA_02314	0.0833333	0.1875	0.270833	0.270833	0.1875
CCNA_01351	0.227704	0.237192	0.170778	0.182163	0.182163
CCNA_01350	0.0714286	0.142857	0.428571	0.214286	0.142857
CCNA_00632	0.0819672	0.196721	0.196721	0.278689	0.245902
CCNA_01337	0.0447761	0.268657	0.208955	0.238806	0.238806
CCNA_01336	0.375	0.1875	0.125	0.1875	0.125
CCNA_01335	0.042735	0.333333	0.264957	0.153846	0.205128
CCNA_01334	0.0497512	0.333333	0.253731	0.164179	0.199005
CCNA_01333	0.1	0.233333	0.3	0.133333	0.233333
CCNA_01339	0.0769231	0.205128	0.153846	0.307692	0.25641
CCNA_01338	0.0933333	0.213333	0.173333	0.26	0.26
CCNA_00275	0.0985915	0.239437	0.239437	0.239437	0.183099
CCNA_00274	0.122857	0.2	0.24	0.208571	0.228571
CCNA_00277	0.11465	0.264331	0.235669	0.152866	0.232484
CCNA_00276	0.12	0.28	0.12	0.3	0.18
CCNA_00271	0.154412	0.171791	0.249332	0.231283	0.193182
CCNA_00273	0.140244	0.235929	0.300657	0.149156	0.174015
CCNA_00272	0.0978261	0.233696	0.277174	0.168478	0.222826
CCNA_00279	0.0119284	0.16501	0.100398	0.499006	0.223658
CCNA_00278	0.131579	0.245614	0.236842	0.175439	0.210526
CCNA_00638	0.0952381	0.220238	0.244048	0.238095	0.202381
CCNA_01723	0.153846	0.272189	0.189349	0.183432	0.201183
CCNA_00778	0.361775	0.184788	0.176499	0.138957	0.137981
xynB2	0.144231	0.211538	0.221154	0.201923	0.221154
smpB	0.251142	0.238965	0.210046	0.158295	0.141553
CCNA_00110	0.2125	0.2375	0.2125	0.1375	0.2
CCNA_00111	0.0697674	0.221987	0.217759	0.230444	0.260042
CCNA_00112	0.0851064	0.234043	0.223404	0.234043	0.223404
CCNA_00113	0.04	0.34	0.3	0.12	0.2
CCNA_00114	0.0689655	0.336207	0.224138	0.198276	0.172414
CCNA_00115	0.0781759	0.28013	0.237785	0.192182	0.211726
CCNA_00116	0.112069	0.149425	0.227011	0.264368	0.247126
CCNA_00117	0.382199	0.167539	0.146597	0.162304	0.141361
CCNA_00118	0.260062	0.164087	0.22291	0.179567	0.173375
CCNA_00119	0.189655	0.232759	0.215517	0.198276	0.163793
CCNA_01421	0.122416	0.224701	0.202394	0.242111	0.208379
CCNA_01420	0.158944	0.274487	0.229912	0.162463	0.174194
CCNA_R0133	0.151174	0.297653	0.160094	0.213146	0.177934
CCNA_01426	0.106509	0.0473373	0.12426	0.325444	0.39645
CCNA_01425	0.0299401	0.153693	0.186627	0.369261	0.260479
CCNA_01424	0.175	0.0555556	0.161111	0.394444	0.213889
flgC	0.00266312	0.011984	0.595206	0.271638	0.118509
CCNA_01692	0.209604	0.192835	0.228659	0.175305	0.193598
CCNA_00779	0.210526	0.22807	0.157895	0.210526	0.192982
CCNA_01873	0	0	1	0	0
CCNA_02256	0.134615	0.261538	0.253846	0.176923	0.173077
CCNA_03965	0.135503	0.26213	0.15858	0.211243	0.232544
CCNA_01878	0.142857	0.142857	0.285714	0.285714	0.142857
CCNA_01879	0.142857	0.285714	0.142857	0.142857	0.285714
CCNA_R0131	0.0593472	0.188922	0.27003	0.233432	0.248269
CCNA_03967	0.109356	0.258809	0.232078	0.191981	0.207776
CCNA_02253	0.075	0.25	0.258333	0.208333	0.208333
CCNA_02252	0.359504	0.152893	0.136364	0.181818	0.169421
CCNA_00064	0.0540541	0.162162	0.243243	0.324324	0.216216
CCNA_00065	0.145038	0.0381679	0.175573	0.396947	0.244275
CCNA_00066	0.146341	0.219512	0.268293	0.219512	0.146341
CCNA_00067	0.194805	0.24026	0.155844	0.214286	0.194805
CCNA_00060	0.149567	0.211372	0.238566	0.176761	0.223733
CCNA_00061	0.0677291	0.207171	0.227092	0.207171	0.290837
CCNA_01519	0.0191606	0.154197	0.0866788	0.502737	0.237226
CCNA_02315	0.0732759	0.176724	0.24569	0.293103	0.211207
CCNA_01517	0.134021	0.298969	0.164948	0.175258	0.226804
CCNA_01516	0.377778	0.127778	0.161111	0.172222	0.161111
CCNA_01515	0.153846	0.192308	0.192308	0.230769	0.230769
CCNA_01514	0.2	0.133333	0.2	0.133333	0.333333
CCNA_01513	0	0.3	0.2	0.2	0.3
CCNA_00069	0.166667	0.272727	0.189394	0.174242	0.19697
CCNA_01511	0.0681818	0.181818	0.204545	0.25	0.295455
CCNA_01510	0.105263	0.157895	0.105263	0.210526	0.421053
CCNA_00456	0.105263	0.210526	0.210526	0.22807	0.245614
CCNA_R0029	0.211404	0.167488	0.172874	0.199477	0.248757
cheYIII	0.0479798	0.0218855	0.286195	0.414141	0.229798
CCNA_03577	0.160173	0.238095	0.225108	0.17316	0.203463
CCNA_03576	0.104121	0.249458	0.281996	0.140998	0.223427
CCNA_03575	0.125561	0.154709	0.170404	0.242152	0.307175
CCNA_03574	0.0180412	0.118557	0.31701	0.286082	0.260309
CCNA_03573	0.0454545	0.181818	0.181818	0.227273	0.363636
CCNA_03572	0.0434783	0.223602	0.173913	0.26087	0.298137
CCNA_03571	0.08	0.2	0.24	0.28	0.2
CCNA_03570	0.133333	0.244444	0.188889	0.266667	0.166667
CCNA_02098	0.228947	0.260526	0.134211	0.168421	0.207895
CCNA_03579	0.222222	0.232323	0.242424	0.121212	0.181818
CCNA_03578	0.142857	0.293233	0.240602	0.135338	0.18797
CCNA_03771	0.129771	0.229008	0.20229	0.209924	0.229008
CCNA_03770	0.187607	0.216456	0.189143	0.21509	0.191704
CCNA_03773	0.153333	0.223333	0.203333	0.193333	0.226667
CCNA_03772	0.0983607	0.254098	0.204918	0.196721	0.245902
CCNA_03775	0.107914	0.179856	0.215827	0.201439	0.294964
CCNA_03774	0.0521173	0.254072	0.198697	0.23127	0.263844
CCNA_03777	0.15678	0.194915	0.211864	0.216102	0.220339
CCNA_03776	0.131034	0.255172	0.206897	0.213793	0.193103
CCNA_03779	0.0952381	0.279762	0.25	0.178571	0.196429
CCNA_03778	0.155459	0.240058	0.18872	0.225597	0.190166
CCNA_03153	0.229885	0.114943	0.137931	0.264368	0.252874
popA	0.0555556	0.354167	0.222222	0.163194	0.204861
CCNA_03152	0.152	0.128	0.184	0.264	0.272
CCNA_03155	0.0222222	0.133333	0.222222	0.377778	0.244444
CCNA_02319	0.025	0.175	0.25	0.325	0.225
CCNA_01603	0.22228	0.209787	0.170744	0.200937	0.196252
CCNA_01602	0.0966292	0.289888	0.211236	0.197753	0.204494
CCNA_01601	0.345763	0.215254	0.138136	0.090678	0.210169
CCNA_01600	0.0843373	0.216867	0.228916	0.228916	0.240964
CCNA_01607	0.18	0.245	0.195	0.185	0.195
CCNA_01606	0.15625	0.28125	0.15625	0.21875	0.1875
CCNA_01605	0.123894	0.221239	0.176991	0.176991	0.300885
CCNA_01604	0.0980392	0.254902	0.215686	0.196078	0.235294
CCNA_03375	0.156627	0.156627	0.228916	0.192771	0.26506
CCNA_03374	0.0688776	0.132653	0.227041	0.298469	0.272959
CCNA_01609	0.0566038	0.169811	0.226415	0.301887	0.245283
CCNA_R0025	0.0991736	0.167651	0.27745	0.243211	0.212515
CCNA_03371	0.135329	0.201784	0.21646	0.199867	0.24656
CCNA_03370	0.125	0.208333	0.25	0.208333	0.208333
CCNA_03373	0.165217	0.286957	0.2	0.130435	0.217391
CCNA_03372	0.13	0.22	0.42	0.11	0.12
CCNA_02350	0.0971993	0.261944	0.210873	0.200988	0.228995
CCNA_02351	0.236041	0.170051	0.213198	0.182741	0.19797
CCNA_02352	0.116162	0.227273	0.181818	0.229798	0.244949
CCNA_02353	0.119565	0.206522	0.184783	0.266304	0.222826
CCNA_02354	0.129134	0.294488	0.23937	0.146457	0.190551
CCNA_02355	0.0566038	0.188679	0.264151	0.264151	0.226415
CCNA_02356	0.318182	0.181818	0.125	0.181818	0.193182
CCNA_02357	0.333333	0.160131	0.133987	0.183007	0.189542
CCNA_02358	0.223558	0.173077	0.15625	0.223558	0.223558
CCNA_02359	0.416918	0.0785498	0.0694864	0.23716	0.197885
CCNA_02428	0.253961	0.137782	0.233077	0.181709	0.193471
CCNA_02429	0.117925	0.226415	0.245283	0.15566	0.254717
CCNA_R0066	0.188513	0.204728	0.17855	0.221685	0.206523
CCNA_R0067	0.159519	0.201144	0.288728	0.14018	0.210429
CCNA_R0064	0.131784	0.146042	0.251738	0.162923	0.307512
CCNA_R0065	0.21532	0.177158	0.141583	0.27236	0.193579
CCNA_R0062	0.172993	0.268964	0.215457	0.208403	0.134184
CCNA_R0063	0.128317	0.280758	0.159334	0.202298	0.229294
CCNA_R0060	0.0656625	0.185167	0.278455	0.241133	0.229582
CCNA_R0061	0.229776	0.15867	0.203827	0.226303	0.181425
CCNA_03119	0.402027	0.162162	0.324324	0.0608108	0.0506757
CCNA_03118	0.11236	0.199438	0.224719	0.233146	0.230337
CCNA_R0068	0.238005	0.175601	0.282385	0.103839	0.200169
CCNA_R0069	0.189925	0.235015	0.157454	0.16357	0.254036
CCNA_00482	0.0425532	0.191489	0.255319	0.212766	0.297872
CCNA_00483	0.0997877	0.0467091	0.210191	0.375796	0.267516
CCNA_00480	0.0555556	0.222222	0.194444	0.222222	0.305556
CCNA_00481	0.0727273	0.254545	0.272727	0.181818	0.218182
CCNA_00486	0.333333	0.166667	0.166667	0.166667	0.166667
CCNA_00487	0.111111	0.174603	0.238095	0.261905	0.214286
CCNA_00484	0.100977	0.179153	0.267101	0.162866	0.289902
CCNA_00485	0.236111	0.222222	0.152778	0.166667	0.222222
CCNA_00488	0.25641	0.166667	0.217949	0.205128	0.153846
iatA	0.0333333	0.2	0.3	0.233333	0.233333
CCNA_00772	0.181818	0.0909091	0.0909091	0.363636	0.272727
CCNA_00773	0.0588235	0.213904	0.192513	0.251337	0.283422
CCNA_00649	0.363636	0.5	0.0454545	0.0454545	0.0454545
CCNA_02518	0.221442	0.215699	0.203574	0.1806	0.178685
CCNA_02519	0.197253	0.233458	0.19975	0.198502	0.171036
CCNA_00644	0.0689655	0.827586	0.0344828	0.0344828	0.0344828
CCNA_02517	0.604255	0.165957	0.131915	0.0468085	0.0510638
iatP	0.111111	0.2	0.222222	0.244444	0.222222
CCNA_02515	0.024	0.0346667	0.101333	0.592	0.248
CCNA_00640	0.177778	0.133333	0.333333	0.2	0.155556
CCNA_00641	0.130282	0.211268	0.21831	0.214789	0.225352
CCNA_00642	0.172093	0.218605	0.213953	0.209302	0.186047
CCNA_00643	0.171429	0.171429	0.228571	0.257143	0.171429
phoB	0.40634	0.198847	0.164265	0.100865	0.129683
CCNA_02224	0.0178876	0.297274	0.268313	0.170358	0.246167
CCNA_02737	0.171053	0.230263	0.185855	0.180921	0.231908
CCNA_02226	0.131965	0.27566	0.173021	0.199413	0.219941
CCNA_02227	0.0769231	0.269231	0.192308	0.230769	0.230769
CCNA_02220	0.0386266	0.266094	0.270386	0.180258	0.244635
CCNA_02221	0.0192519	0.315732	0.278328	0.183168	0.20352
CCNA_02222	0.0194704	0.284657	0.268302	0.184579	0.242991
CCNA_02223	0.0186757	0.316355	0.255801	0.176005	0.233164
surF1	0.117207	0.189526	0.209476	0.239401	0.244389
CCNA_03600	0.145455	0.185455	0.156364	0.254545	0.258182
CCNA_03603	0.0852459	0.22623	0.219672	0.219672	0.24918
CCNA_03602	0.105882	0.211765	0.258824	0.176471	0.247059
CCNA_02228	0.111111	0.166667	0.166667	0.277778	0.277778
CCNA_02229	0	0	1	0	0
CCNA_02738	0.1	0.171429	0.171429	0.285714	0.271429
CCNA_02739	0.105357	0.201786	0.192857	0.242857	0.257143
CCNA_03599	0.0340314	0.159686	0.115183	0.335079	0.356021
CCNA_02790	0.0743802	0.166667	0.212121	0.260331	0.286501
parE-3	0.100209	0.306889	0.223382	0.169102	0.200418
parE-2	0.0761246	0.186851	0.290657	0.207612	0.238754
parE-1	0.17803	0.174242	0.329545	0.155303	0.162879
CCNA_03592	0.139535	0.232558	0.139535	0.186047	0.302326
CCNA_03595	0.047619	0.27619	0.171429	0.257143	0.247619
CCNA_00444	0.053973	0.0149925	0.238381	0.478261	0.214393
CCNA_03597	0.121406	0.265176	0.246006	0.204473	0.162939
parE-4	0.0736196	0.306748	0.245399	0.168712	0.205521
CCNA_00445	0.0509868	0.0279605	0.212171	0.495066	0.213816
dnaE	0.040146	0.315693	0.282847	0.171533	0.189781
CCNA_00443	0.0381125	0.0145191	0.245009	0.529946	0.172414
CCNA_02796	0.107692	0.230769	0.153846	0.2	0.307692
CCNA_R0135	0.166667	0.25	0.125	0.125	0.333333
CCNA_R0026	0.149419	0.228982	0.249475	0.187207	0.184916
CCNA_00521	0.10687	0.229008	0.282443	0.183206	0.198473
CCNA_01991	0.194859	0.209478	0.255422	0.154538	0.185703
CCNA_02649	0.106667	0.346667	0.173333	0.2	0.173333
CCNA_01997	0.181874	0.167694	0.259556	0.188656	0.202219
CCNA_01996	0.194603	0.206051	0.24121	0.170074	0.188062
CCNA_01995	0.164642	0.19973	0.246964	0.186235	0.202429
CCNA_01994	0.179941	0.231563	0.238938	0.160767	0.188791
CCNA_02642	0.0645161	0.0860215	0.376344	0.317204	0.155914
CCNA_01999	0.209983	0.200038	0.226238	0.177281	0.18646
CCNA_01998	0.17278	0.222973	0.251931	0.155405	0.196911
CCNA_02647	0.0952381	0.0952381	0.238095	0.285714	0.285714
CCNA_00525	0.145719	0.214936	0.253188	0.1949	0.191257
CCNA_00524	0.142857	0.263158	0.203008	0.180451	0.210526
CCNA_00527	0.101562	0.294531	0.260156	0.159375	0.184375
CCNA_00526	0.183746	0.208481	0.240283	0.194346	0.173145
CCNA_02962	0.140413	0.192801	0.287598	0.171775	0.207413
CCNA_02178	0.169956	0.166667	0.163377	0.236842	0.263158
CCNA_01199	0.237347	0.17801	0.239092	0.169284	0.176265
CCNA_01198	0.220065	0.197411	0.200647	0.184466	0.197411
CCNA_02179	0.604167	0.114583	0.0625	0.09375	0.125
CCNA_01193	0.0416667	0.291667	0.291667	0.166667	0.208333
CCNA_01192	0.0909091	0.272727	0.272727	0.181818	0.181818
CCNA_01191	0.119403	0.208955	0.253731	0.19403	0.223881
CCNA_01190	0.0742857	0.337143	0.234286	0.154286	0.2
CCNA_01196	0.116505	0.281553	0.203883	0.174757	0.223301
CCNA_01195	0.0264706	0.320588	0.288235	0.173529	0.191176
CCNA_01194	0.0350877	0.216374	0.274854	0.19883	0.274854
CCNA_03909	0.134639	0.178703	0.206854	0.212974	0.26683
CCNA_03906	0.54023	0.12069	0.229885	0.0689655	0.0402299
CCNA_03907	0.288719	0.227533	0.193117	0.151052	0.139579
CCNA_03904	0	0.166667	0.190476	0.404762	0.238095
CCNA_03905	0.109705	0.253165	0.189873	0.189873	0.257384
CCNA_03902	0.147541	0.122951	0.245902	0.254098	0.229508
CCNA_03903	0.0535714	0.196429	0.392857	0.232143	0.125
CCNA_03900	0.166163	0.196375	0.193353	0.18429	0.259819
CCNA_03901	0.723338	0.119011	0.0278207	0.0293663	0.100464
CCNA_01218	0.119149	0.27234	0.238298	0.191489	0.178723
CCNA_R0023	0.13669	0.163547	0.259991	0.167058	0.272714
CCNA_02175	0.0714286	0.214286	0.214286	0.285714	0.214286
CCNA_00807	0.232759	0.20546	0.222701	0.159483	0.179598
CCNA_00804	0.22449	0.190476	0.22449	0.176871	0.183673
CCNA_00803	0.0637119	0.0253265	0.28334	0.430946	0.196676
CCNA_00808	0.225071	0.24723	0.175372	0.183602	0.168724
CCNA_00809	0.0212766	0.297872	0.191489	0.234043	0.255319
CCNA_01049	0.284746	0.2	0.20339	0.162712	0.149153
CCNA_01048	0	1	0	0	0
CCNA_01041	0.111369	0.176334	0.285383	0.176334	0.25058
CCNA_01040	0.166667	0.166667	0.166667	0.166667	0.333333
CCNA_01043	0.0441088	0.184894	0.23565	0.268882	0.266465
CCNA_01042	0.0278121	0.137824	0.263288	0.279357	0.291718
CCNA_01045	0.0921053	0.188596	0.201754	0.27193	0.245614
CCNA_01044	0.0569106	0.20122	0.300813	0.207317	0.23374
CCNA_01047	0.28125	0.15625	0.1875	0.1875	0.1875
CCNA_01046	0.154058	0.192572	0.204952	0.22696	0.221458
CCNA_02779	0.132621	0.169705	0.248272	0.189189	0.260214
CCNA_00840	0.20625	0.175	0.16875	0.25625	0.19375
lepA	0.227092	0.195219	0.203187	0.187251	0.187251
mcsS	0.205882	0.235294	0.183824	0.161765	0.213235
CCNA_01101	0.207299	0.122837	0.248871	0.19921	0.221783
CCNA_00248	0.0869565	0.208696	0.226087	0.221739	0.256522
CCNA_00249	0.218919	0.227027	0.189189	0.183784	0.181081
CCNA_00240	0.248352	0.180952	0.180952	0.18022	0.209524
CCNA_00241	0.257951	0.190813	0.168433	0.202591	0.180212
CCNA_00243	0.151163	0.639535	0.135659	0.0271318	0.0465116
CCNA_00244	0.115942	0.130435	0.144928	0.26087	0.347826
CCNA_00245	0.225806	0.225806	0.139785	0.215054	0.193548
CCNA_00246	0.111111	0.186869	0.171717	0.222222	0.308081
CCNA_01575	0.130319	0.295213	0.172872	0.202128	0.199468
CCNA_00404	0.0571429	0.2	0.228571	0.271429	0.242857
CCNA_02775	0.317757	0.161549	0.194927	0.178905	0.146862
CCNA_03466	0.08	0.2	0.28	0.2	0.24
CCNA_00107	0.13369	0.245989	0.214973	0.206417	0.19893
CCNA_00106	0.0735931	0.186147	0.212121	0.255411	0.272727
CCNA_00105	0.132576	0.246212	0.215909	0.17803	0.227273
CCNA_00104	0.156716	0.276119	0.186567	0.171642	0.208955
CCNA_00103	0.126761	0.267606	0.183099	0.197183	0.225352
CCNA_00102	0	0.2	0.2	0	0.6
CCNA_01458	0.121387	0.17341	0.365607	0.112717	0.226879
CCNA_01459	0.163934	0.147541	0.377049	0.0983607	0.213115
CCNA_01457	0.120603	0.145729	0.39196	0.130653	0.211055
CCNA_01452	0.0801603	0.232465	0.188377	0.232465	0.266533
CCNA_01453	0.144701	0.175363	0.260086	0.210059	0.20979
CCNA_00109	0.127119	0.257062	0.20904	0.19209	0.214689
CCNA_00108	0.150485	0.213592	0.223301	0.194175	0.218447
CCNA_01298	0.223104	0.194184	0.214797	0.176412	0.191503
CCNA_01299	0.115942	0.221014	0.217391	0.210145	0.235507
CCNA_R0024	0.192405	0.161813	0.259479	0.206352	0.179952
CCNA_03745	0.0812641	0.292325	0.255079	0.17833	0.193002
CCNA_01290	0.0377358	0.207547	0.169811	0.245283	0.339623
CCNA_01291	0.0357143	0.178571	0.25	0.25	0.285714
CCNA_01292	0.118644	0.220339	0.186441	0.20339	0.271186
CCNA_01293	0	0	0	0.5	0.5
CCNA_01294	0.0689655	0.137931	0.344828	0.275862	0.172414
CCNA_01295	0.22381	0.195238	0.195238	0.180952	0.204762
CCNA_01297	0.203463	0.199134	0.17316	0.229437	0.194805
CCNA_03747	0.135542	0.277108	0.210843	0.156627	0.21988
CCNA_03740	0.0311707	0.460674	0.240667	0.108735	0.158753
rsmB	0.135135	0.324324	0.189189	0.135135	0.216216
CCNA_00401	0.0625	0.1875	0.208333	0.260417	0.28125
CCNA_03742	0.1	0.3	0.22	0.14	0.24
pgl	0.12015	0.227472	0.187422	0.239049	0.225907
CCNA_03743	0.0928571	0.25	0.235714	0.214286	0.207143
CCNA_00079	0.0347826	0.137391	0.241739	0.276522	0.309565
CCNA_00078	0.0422078	0.175325	0.188312	0.324675	0.269481
CCNA_00073	0.104762	0.314286	0.180952	0.209524	0.190476
CCNA_00072	0.0676329	0.2657	0.231884	0.202899	0.231884
CCNA_00071	0.0869565	0.25	0.173913	0.23913	0.25
CCNA_00070	0.083871	0.232258	0.180645	0.264516	0.23871
CCNA_00077	0.103359	0.162791	0.237726	0.268734	0.22739
CCNA_00076	0.0625	0.2	0.25	0.2625	0.225
CCNA_00075	0.10883	0.160164	0.221766	0.252567	0.256674
CCNA_00074	0.157454	0.147404	0.21608	0.221106	0.257956
CCNA_00346	0.217889	0.23103	0.177618	0.191183	0.182281
CCNA_00407	0.0415094	0.320755	0.196226	0.218868	0.222642
CCNA_03530	0.188679	0.169811	0.207547	0.245283	0.188679
CCNA_03296	0.106599	0.182741	0.248731	0.218274	0.243655
CCNA_03297	0.0151515	0.318182	0.30303	0.181818	0.181818
CCNA_03746	0.0501931	0.23166	0.314672	0.183398	0.220077
CCNA_03295	0.121951	0.0731707	0.121951	0.402439	0.280488
CCNA_03292	0.1	0.2	0.228571	0.214286	0.257143
CCNA_03741	0.0344828	0.353448	0.25	0.163793	0.198276
CCNA_03290	0.128272	0.235602	0.269634	0.175393	0.191099
CCNA_03291	0	0.133333	0.25	0.416667	0.2
CCNA_03748	0.166667	0.262411	0.187943	0.180851	0.202128
CCNA_03749	0.116279	0.255814	0.209302	0.186047	0.232558
CCNA_03298	0.176471	0.176471	0.235294	0.235294	0.176471
CCNA_03299	0.176471	0.223529	0.223529	0.188235	0.188235
stpA	0.00626959	0.420063	0.280564	0.131661	0.161442
stpC	0.00533333	0.437333	0.285333	0.117333	0.154667
stpB	0.00829016	0.448705	0.251813	0.121244	0.169948
stpD	0.0250313	0.321026	0.335419	0.144556	0.173967
CCNA_01154	0.290886	0.228464	0.177278	0.151061	0.15231
CCNA_01971	0.208014	0.231032	0.185848	0.183291	0.191816
CCNA_01778	0.063253	0.310241	0.256024	0.177711	0.192771
CCNA_01676	0.153409	0.227273	0.25	0.176136	0.193182
CCNA_01677	0.148485	0.190909	0.2	0.242424	0.218182
CCNA_01674	0.368421	0.32133	0.099723	0.0914127	0.119114
CCNA_01675	0.152905	0.266055	0.192661	0.192661	0.195719
CCNA_01672	0.261111	0.422222	0.1	0.111111	0.105556
CCNA_01673	0.274809	0.371501	0.127226	0.104326	0.122137
CCNA_01670	0.0237467	0.456464	0.28496	0.0976253	0.137203
CCNA_03347	0.0492958	0.295775	0.225352	0.197183	0.232394
CCNA_03348	0.120706	0.191272	0.241411	0.218199	0.228412
stpX	0.0757329	0.403094	0.223941	0.154723	0.142508
CCNA_03330	0.0865191	0.380282	0.191147	0.17505	0.167002
CCNA_00405	0.0819672	0.180328	0.256831	0.240437	0.240437
CCNA_01678	0.214689	0.245763	0.169492	0.183616	0.186441
CCNA_01679	0.240876	0.244526	0.182482	0.160584	0.171533
CCNA_02347	0.25222	0.236234	0.168739	0.16341	0.179396
CCNA_02346	0.2	0.246154	0.176923	0.176923	0.2
CCNA_02345	0.216895	0.212329	0.171233	0.200913	0.19863
CCNA_02344	0.284271	0.213564	0.152958	0.190476	0.15873
CCNA_02343	0.198738	0.0914826	0.189274	0.318612	0.201893
CCNA_02342	0.135458	0.0478088	0.193227	0.373506	0.25
CCNA_02437	0.241758	0.131868	0.21978	0.208791	0.197802
CCNA_02436	0.237443	0.205479	0.123288	0.200913	0.232877
CCNA_02439	0.2	0.24	0.2	0.16	0.2
CCNA_03121	0.0776699	0.152104	0.294498	0.23301	0.242718
CCNA_03122	0.0776699	0.15534	0.242718	0.257282	0.26699
CCNA_03123	0.0830325	0.126354	0.310469	0.227437	0.252708
CCNA_03124	0.0387097	0.148387	0.135484	0.290323	0.387097
CCNA_03125	0.0930233	0.162791	0.186047	0.302326	0.255814
CCNA_02349	0.130841	0.257009	0.163551	0.219626	0.228972
CCNA_02348	0.285714	0.190476	0.178571	0.166667	0.178571
CCNA_R0075	0.138158	0.16187	0.261259	0.166634	0.272078
trpS	0.190556	0.244519	0.195616	0.168634	0.200675
CCNA_R0077	0.222052	0.145783	0.270705	0.204746	0.156715
CCNA_R0076	0.0532232	0.15863	0.303125	0.219252	0.26577
CCNA_R0071	0.0891254	0.111448	0.299419	0.236811	0.263196
CCNA_R0070	0.180925	0.251167	0.173085	0.197163	0.197661
CCNA_R0073	0.14517	0.226632	0.196345	0.22141	0.210444
CCNA_R0072	0.139831	0.215572	0.20286	0.23464	0.207097
CCNA_03333	0.143939	0.272727	0.19697	0.151515	0.234848
relB-1	0.48209	0.113433	0.143284	0.147761	0.113433
relB-3	0.124352	0.207254	0.264249	0.233161	0.170984
relB-4	0.249315	0.221918	0.243836	0.142466	0.142466
CCNA_R0078	0.279062	0.504657	0.102449	0.0624353	0.051397
CCNA_00491	0.262145	0.185185	0.193843	0.177489	0.181337
CCNA_00490	0.0765957	0.204255	0.225532	0.234043	0.259574
CCNA_00493	0.217701	0.227874	0.212614	0.159715	0.182096
CCNA_00492	0.234581	0.202643	0.211454	0.1663	0.185022
CCNA_00495	0.222266	0.156963	0.236035	0.199449	0.185287
CCNA_00494	0.219697	0.232955	0.215909	0.172348	0.159091
CCNA_00497	0.1393	0.250584	0.233463	0.18677	0.189883
CCNA_01578	0.0652921	0.230241	0.178694	0.268041	0.257732
CCNA_00499	0.112903	0.290323	0.193548	0.193548	0.209677
CCNA_00498	0.156504	0.207317	0.28252	0.154472	0.199187
CCNA_03342	0.0480226	0.132768	0.288136	0.299435	0.231638
CCNA_03760	0.159292	0.24115	0.190265	0.183628	0.225664
CCNA_01708	0.0794165	0.184765	0.223663	0.244733	0.267423
CCNA_01709	0.107143	0.214286	0.25	0.178571	0.25
CCNA_00657	0.099187	0.2	0.274797	0.21626	0.209756
CCNA_00656	0.0987342	0.222785	0.227848	0.222785	0.227848
CCNA_00655	0.195122	0.121951	0.243902	0.219512	0.219512
CCNA_00654	0.111111	0.722222	0.0833333	0.0555556	0.0277778
CCNA_02505	0.0943396	0.150943	0.188679	0.320755	0.245283
CCNA_02504	0.0851064	0.12766	0.148936	0.340426	0.297872
CCNA_00659	0.0984252	0.188976	0.283465	0.212598	0.216535
CCNA_01701	0.0348837	0.116279	0.139535	0.360465	0.348837
CCNA_01706	0.0278884	0.131474	0.184595	0.25498	0.401062
CCNA_01707	0.0420561	0.135514	0.196262	0.28972	0.336449
CCNA_01704	0.102041	0.204082	0.22449	0.209184	0.260204
CCNA_02502	0.0782609	0.243478	0.165217	0.26087	0.252174
CCNA_01852	0.0233645	0.191589	0.186916	0.224299	0.373832
CCNA_01853	0.162791	0.190698	0.195349	0.195349	0.255814
CCNA_02239	0.225989	0.220339	0.19209	0.19209	0.169492
CCNA_02238	0.144509	0.196532	0.16763	0.271676	0.219653
CCNA_01856	0.208333	0.208333	0.166667	0.208333	0.208333
CCNA_01857	0.111111	0.222222	0.166667	0.222222	0.277778
CCNA_01854	0.142857	0.142857	0.285714	0.142857	0.285714
CCNA_01855	0.16	0.12	0.2	0.24	0.28
CCNA_02233	0.0833333	0.25	0.25	0.166667	0.25
CCNA_02232	0.166667	0.222222	0.222222	0.166667	0.222222
CCNA_01858	0.192308	0.192308	0.153846	0.192308	0.269231
CCNA_02230	0.148649	0.211712	0.18018	0.216216	0.243243
CCNA_02237	0.295082	0.170492	0.170492	0.17377	0.190164
CCNA_02236	0.125	0.25	0.1875	0.1875	0.25
CCNA_03761	0.120729	0.223235	0.191344	0.232346	0.232346
CCNA_02234	0.0951526	0.222621	0.143627	0.256732	0.281867
CCNA_02725	0.0492611	0.216749	0.211823	0.236453	0.285714
CCNA_02724	0.0705882	0.170588	0.252941	0.264706	0.241176
CCNA_02727	0.0480769	0.221154	0.211538	0.346154	0.173077
CCNA_02726	0.0657895	0.242105	0.252632	0.228947	0.210526
CCNA_02721	0.111111	0.276596	0.231678	0.174941	0.205674
CCNA_02720	0.104839	0.0241935	0.153226	0.447581	0.270161
CCNA_02723	0.662162	0.162162	0.0045045	0.0810811	0.0900901
CCNA_03349	0	0.142857	0.285714	0.357143	0.214286
CCNA_03634	0.3125	0.125	0.1875	0.1875	0.1875
CCNA_03635	0.318021	0.201413	0.204947	0.137809	0.137809
CCNA_03636	0.210383	0.221311	0.202186	0.15847	0.20765
CCNA_03637	0.165354	0.220472	0.220472	0.188976	0.204724
CCNA_02729	0.133987	0.24183	0.196078	0.20915	0.218954
CCNA_02728	0.142049	0.162422	0.21279	0.241653	0.241087
CCNA_03632	0.116667	0.191667	0.241667	0.225	0.225
CCNA_03633	0.156716	0.179104	0.358209	0.19403	0.11194
rsaFa	0.170166	0.148066	0.254144	0.224309	0.203315
rsaFb	0.157504	0.264487	0.181278	0.193165	0.203566
corC	0.114894	0.176596	0.270213	0.191489	0.246809
nuoN	0.0947776	0.314313	0.248549	0.149903	0.192456
CCNA_01574	0.215909	0.227273	0.193182	0.227273	0.136364
nuoL	0.0992727	0.262182	0.281455	0.164727	0.192364
ileS	0.194215	0.179752	0.196281	0.196281	0.233471
nuoM	0.100106	0.280243	0.256207	0.169044	0.1944
tonB1	0.109623	0.244021	0.221016	0.216329	0.209011
CCNA_02430	0.0887978	0.241803	0.234973	0.199454	0.234973
CCNA_02433	0.025974	0.11039	0.285714	0.331169	0.246753
CCNA_02659	0.0575743	0.238792	0.250118	0.227938	0.225578
CCNA_02658	0.20701	0.18839	0.210296	0.199343	0.194962
CCNA_02432	0.0289855	0.202899	0.188406	0.318841	0.26087
CCNA_02651	0.178947	0.189474	0.210526	0.210526	0.210526
CCNA_02650	0.125561	0.304933	0.192825	0.179372	0.197309
CCNA_02653	0.0833333	0.25	0.0833333	0.25	0.333333
CCNA_02652	0.056338	0.215962	0.159624	0.248826	0.319249
CCNA_02655	0.21875	0.15625	0.203125	0.171875	0.25
CCNA_02654	0.14	0.12	0.2	0.26	0.28
CCNA_02657	0.225201	0.19571	0.198391	0.206434	0.174263
CCNA_02656	0.161905	0.247619	0.2	0.2	0.190476
CCNA_02341	0.195767	0.149912	0.220459	0.21164	0.222222
CCNA_02340	0.0503282	0.310722	0.249453	0.19256	0.196937
CCNA_03120	0.18723	0.0241588	0.0716135	0.38654	0.330457
CCNA_02438	0.16	0.2	0.2	0.24	0.2
CCNA_01495	0.1875	0.208333	0.166667	0.1875	0.25
CCNA_02025	0.198327	0.235364	0.222222	0.166069	0.178017
CCNA_03919	0.201289	0.175501	0.158309	0.234241	0.230659
CCNA_03918	0.114865	0.168919	0.202703	0.222973	0.290541
CCNA_03915	0.333333	0.016317	0.025641	0.251748	0.37296
CCNA_03914	0.171429	0	0.257143	0.457143	0.114286
CCNA_03917	0.323204	0.297652	0.131906	0.122928	0.124309
CCNA_03916	0.103093	0.268041	0.237113	0.175258	0.216495
CCNA_03911	0.101908	0.254072	0.20335	0.227082	0.213588
CCNA_03910	0.232456	0.201754	0.188596	0.171053	0.20614
CCNA_03913	0.238298	0.212766	0.195745	0.144681	0.208511
CCNA_03912	0.0945946	0.195946	0.189189	0.22973	0.290541
CCNA_00784	0.379121	0.197802	0.148352	0.0934066	0.181319
CCNA_R0178	0.0685315	0.198601	0.358042	0.13986	0.234965
CCNA_03046	0.0701754	0.0175439	0.157895	0.447368	0.307018
CCNA_02733	0.171875	0.153125	0.28125	0.19375	0.2
CCNA_00815	0.0652174	0.217391	0.217391	0.23913	0.26087
CCNA_00814	0	0	0.666667	0.285714	0.047619
CCNA_00817	0.08	0.213333	0.213333	0.253333	0.24
CCNA_00816	0.0266667	0.153333	0.266667	0.273333	0.28
CCNA_00811	0.0345722	0.289542	0.247191	0.183232	0.245462
CCNA_00810	0.0418605	0.251163	0.237209	0.225581	0.244186
CCNA_00813	0.0277778	0.138889	0.305556	0.277778	0.25
CCNA_00812	0.111111	0.166667	0.236111	0.236111	0.25
ccoO	0.0508982	0.13997	0.0508982	0.675898	0.0823353
CCNA_00818	0.0526316	0.210526	0.157895	0.368421	0.210526
CCNA_R0177	0.236842	0.131579	0.184211	0.184211	0.263158
CCNA_01078	0.12	0.2	0.226667	0.266667	0.186667
CCNA_01079	0.157205	0.266376	0.200873	0.19214	0.183406
CCNA_01074	0.190476	0.176871	0.156463	0.272109	0.204082
CCNA_01075	0.386694	0.180873	0.149688	0.164241	0.118503
CCNA_01076	0.358852	0.205742	0.172249	0.143541	0.119617
CCNA_01077	0.04	0.19	0.25	0.24	0.28
CCNA_01070	0.0229358	0.334862	0.220183	0.16055	0.261468
CCNA_01071	0.0416667	0.25463	0.25	0.222222	0.231481
CCNA_01072	0.180723	0.180723	0.26506	0.156627	0.216867
CCNA_01073	0.143064	0.177746	0.242775	0.213873	0.222543
CCNA_03240	0.152381	0.152381	0.2	0.247619	0.247619
xylC	0.239506	0.182716	0.17284	0.241975	0.162963
CCNA_03343	0.0379747	0.0886076	0.253165	0.392405	0.227848
ccoN	0.0170413	0.13198	0.0678028	0.629804	0.153372
CCNA_02205	0.274194	0.21371	0.189516	0.16129	0.16129
CCNA_02880	0.5	0.25	0	0.25	0
CCNA_02881	0.2	0.3	0.1	0.2	0.2
CCNA_02882	0.111111	0.888889	0	0	0
CCNA_02883	0.190476	0.666667	0.047619	0.047619	0.047619
CCNA_02884	0.08	0.16	0.16	0.32	0.28
CCNA_02885	0.0679612	0.23301	0.242718	0.252427	0.203883
CCNA_00259	0.109434	0.237736	0.211321	0.211321	0.230189
CCNA_02887	0.111111	0.288889	0.177778	0.222222	0.2
CCNA_00257	0.0882239	0.136222	0.236106	0.303731	0.235717
CCNA_00256	0.220974	0.209738	0.164794	0.209738	0.194757
CCNA_00255	0.195652	0.224638	0.181159	0.188406	0.210145
CCNA_00254	0.165919	0.264574	0.219731	0.170404	0.179372
CCNA_00253	0.166118	0.280154	0.233553	0.149671	0.170504
CCNA_00251	0.16129	0.201613	0.193548	0.225806	0.217742
CCNA_00250	0.209003	0.131833	0.189711	0.231511	0.237942
CCNA_00496	0.201754	0.183114	0.230811	0.193531	0.190789
CCNA_03242	0.114286	0.171429	0.228571	0.285714	0.2
CCNA_01449	0.182119	0.201987	0.215232	0.208609	0.192053
CCNA_01445	0.109302	0.272093	0.227907	0.197674	0.193023
CCNA_01444	0.0609579	0.277213	0.211901	0.249637	0.20029
CCNA_01447	0.0772769	0.283349	0.230911	0.191352	0.217111
CCNA_01446	0.0833333	0.246324	0.245098	0.203431	0.221814
CCNA_01441	0.223952	0.242635	0.17006	0.190419	0.172934
CCNA_01440	0.239116	0.214185	0.191614	0.179998	0.175087
CCNA_01443	0.06621	0.159817	0.333333	0.219178	0.221461
CCNA_01442	0.139241	0.185654	0.191983	0.248945	0.234177
CCNA_02730	0.112299	0.192513	0.272727	0.197861	0.224599
CCNA_01289	0.125	0.277778	0.152778	0.25	0.194444
CCNA_01288	0.122093	0.25	0.238372	0.19186	0.197674
CCNA_01287	0.0514286	0.2	0.194286	0.251429	0.302857
CCNA_01286	0.0600601	0.3003	0.312312	0.129129	0.198198
CCNA_01285	0.0924658	0.222603	0.188356	0.246575	0.25
CCNA_01284	0.214286	0.178571	0.142857	0.214286	0.25
CCNA_01283	0.166667	0.166667	0.277778	0.166667	0.222222
CCNA_01282	0.0666667	0.233333	0.233333	0.233333	0.233333
CCNA_01280	0.0158103	0.146245	0.26087	0.391304	0.185771
CCNA_00837	0.166667	0.138889	0.194444	0.25	0.25
xylA	0.117647	0.176471	0.176471	0.294118	0.235294
ccoS	0.323636	0.138182	0.0290909	0.48	0.0290909
ccoQ	0.0797024	0.177471	0.063762	0.591923	0.0871413
ccoP	0.0728242	0.149201	0.0479574	0.664298	0.0657194
CCNA_00833	0.227273	0.181818	0.227273	0.181818	0.181818
CCNA_00380	0.163636	0.218182	0.2	0.181818	0.236364
CCNA_01702	0.0625	0.078125	0.15625	0.40625	0.296875
CCNA_00831	0.131579	0.210526	0.236842	0.210526	0.210526
CCNA_01703	0.106383	0.138298	0.196809	0.271277	0.287234
CCNA_00006	0.204651	0.24186	0.195349	0.17907	0.17907
CCNA_00007	0.261845	0.226933	0.174065	0.161097	0.17606
CCNA_00004	0.172285	0.273408	0.202247	0.164794	0.187266
CCNA_00002	0.126143	0.281536	0.201097	0.175503	0.215722
CCNA_00003	0.190955	0.281407	0.18593	0.170854	0.170854
CCNA_00001	0.147265	0.26087	0.213184	0.154278	0.224404
CCNA_00936	0	0.2	0.2	0.2	0.4
CCNA_00658	0.102041	0.193878	0.255102	0.217687	0.231293
flmE	0.0373444	0.0165975	0.410788	0.340249	0.195021
flmD	0.0769231	0.25641	0.179487	0.230769	0.25641
flmF	0.0517241	0.0172414	0.344828	0.362069	0.224138
flmH	0.0145631	0.145631	0.122977	0.530744	0.186084
fliF	0.0286885	0.0150273	0.57377	0.224044	0.15847
CCNA_00934	0.106452	0.287097	0.232258	0.167742	0.206452
sixA	0.220126	0.238994	0.213836	0.163522	0.163522
CCNA_02868	0.5	0.166667	0.166667	0	0.166667
CCNA_02869	0	1	0	0	0
CCNA_02503	0.0810811	0.121622	0.189189	0.337838	0.27027
CCNA_02862	1	0	0	0	0
CCNA_02863	1	0	0	0	0
CCNA_02860	0.181435	0.21519	0.236287	0.194093	0.172996
CCNA_01705	0.0393996	0.133208	0.166979	0.260788	0.399625
CCNA_02866	0.127698	0.145683	0.196043	0.318345	0.21223
CCNA_02867	1	0	0	0	0
CCNA_02864	0.333333	0.333333	0	0	0.333333
CCNA_02865	0.25	0.125	0.25	0.25	0.125
CCNA_03759	0.130435	0.173913	0.188406	0.246377	0.26087
CCNA_03758	0	0.518519	0.148148	0.185185	0.148148
CCNA_01159	0.0621849	0.209804	0.247059	0.273669	0.207283
acpS	0.213389	0.230126	0.188285	0.167364	0.200837
CCNA_03753	0.0873016	0.126984	0.293651	0.301587	0.190476
CCNA_03752	0.157862	0.22113	0.209459	0.210074	0.201474
CCNA_03751	0.216165	0.191729	0.203008	0.191729	0.197368
CCNA_03750	0.15371	0.34629	0.217314	0.125442	0.157244
CCNA_03757	0.1	0.2	0.3	0.2	0.2
CCNA_03756	0.165217	0.230435	0.226087	0.178261	0.2
CCNA_03285	0.177419	0.204301	0.247312	0.16129	0.209677
rsaA	0.126392	0.256478	0.205631	0.194774	0.216725
CCNA_03287	0.0740741	0.216931	0.227513	0.232804	0.248677
CCNA_03286	0.110048	0.210526	0.23445	0.23445	0.210526
CCNA_03281	0.123241	0.18233	0.301632	0.170512	0.222285
CCNA_03280	0.606618	0.0698529	0.0661765	0.132353	0.125
CCNA_03283	0.0578947	0.226316	0.205263	0.247368	0.263158
CCNA_03282	0.0818182	0.2	0.190909	0.227273	0.3
CCNA_02450	0.0645161	0.293718	0.235993	0.188455	0.217317
CCNA_03289	0.136691	0.158273	0.223022	0.23741	0.244604
CCNA_03288	0.181818	0.232955	0.244318	0.142045	0.198864
CCNA_00712	0.0625	0.21875	0.28125	0.25	0.1875
CCNA_00710	0.0405405	0.162162	0.202703	0.27027	0.324324
CCNA_00711	0.66967	0.159159	0.021021	0.0510511	0.0990991
CCNA_00716	0.0622877	0.185164	0.233579	0.233862	0.285108
CCNA_00714	0.0833333	0.166667	0.208333	0.270833	0.270833
CCNA_00718	0.0567773	0.146741	0.346661	0.220312	0.229508
CCNA_03357	0.196429	0.208333	0.232143	0.178571	0.184524
CCNA_01664	0.25	0.25	0.125	0.125	0.25
CCNA_03355	0.0668939	0.22369	0.249254	0.227951	0.232211
CCNA_03354	0.0940594	0.222772	0.262376	0.19802	0.222772
CCNA_03353	0.234899	0.194631	0.187919	0.194631	0.187919
CCNA_03352	0.254186	0.194825	0.200913	0.191781	0.158295
CCNA_03351	0.223776	0.202797	0.202797	0.181818	0.188811
CCNA_03350	0.0526316	0.210526	0.315789	0.210526	0.210526
ibpA	0.0694444	0.166667	0.25	0.25	0.263889
CCNA_01669	0.0114379	0.504902	0.279412	0.0767974	0.127451
CCNA_01668	0.0202429	0.520243	0.301619	0.0647773	0.0931174
CCNA_03359	0.188045	0.216687	0.241594	0.178082	0.175592
CCNA_03358	0.167886	0.217073	0.221545	0.206911	0.186585
CCNA_02404	0.104816	0.249292	0.209632	0.203966	0.232295
CCNA_02405	0.131387	0.223844	0.214112	0.184915	0.245742
CCNA_02406	0.152	0.248	0.192	0.168	0.24
CCNA_01859	0.185185	0.166667	0.203704	0.222222	0.222222
cysI	0.00564653	0.418408	0.303219	0.101637	0.17109
cysH	0.00333704	0.43604	0.284761	0.105673	0.170189
CCNA_02402	0.00214133	0.0471092	0.48394	0.336188	0.130621
CCNA_02403	0.102326	0.218605	0.213953	0.223256	0.24186
CCNA_R0040	0.187713	0.225939	0.159044	0.214334	0.212969
CCNA_R0041	0.160848	0.276419	0.155391	0.171449	0.235893
CCNA_R0042	0.151055	0.248427	0.194002	0.208812	0.197705
CCNA_R0043	0.0422857	0.166571	0.221143	0.352857	0.217143
CCNA_R0044	0.449473	0.361295	0.0749122	0.0608662	0.053453
CCNA_02409	0.302829	0.063228	0.0282862	0.254576	0.351082
CCNA_R0046	0.128986	0.307706	0.172567	0.181306	0.209436
CCNA_R0047	0.15836	0.158245	0.211484	0.211772	0.260139
CCNA_02573	0.22963	0.259259	0.17037	0.148148	0.192593
CCNA_02235	0.0869565	0.173913	0.130435	0.26087	0.347826
ribH	0.679752	0.0805785	0.0247934	0.0578512	0.157025
CCNA_03323	0.0197166	0.120148	0.237831	0.342575	0.279729
CCNA_03945	0.465221	0.119671	0.162304	0.133882	0.118923
CCNA_00626	0.0363636	0.0181818	0.272727	0.463636	0.209091
CCNA_00627	0.0833333	0.0833333	0.166667	0.5	0.166667
CCNA_00624	0.0769231	0.0769231	0.230769	0.461538	0.153846
CCNA_00625	0.0933333	0.257778	0.21037	0.207407	0.231111
CCNA_00622	0.149876	0.214462	0.237021	0.177379	0.221261
CCNA_00623	0.0921053	0.184211	0.197368	0.289474	0.236842
CCNA_00620	0.222222	0.222222	0.222222	0.111111	0.222222
CCNA_00621	0.2	0.15	0.225	0.175	0.25
CCNA_01711	0.0925926	0.166667	0.185185	0.277778	0.277778
CCNA_01710	0.137931	0.103448	0.172414	0.310345	0.275862
CCNA_01713	0.0198413	0.281746	0.333333	0.170635	0.194444
CCNA_01712	0.0689655	0.172414	0.232759	0.258621	0.267241
CCNA_01715	0.127619	0.198095	0.240952	0.187619	0.245714
CCNA_01714	0.0446429	0.303571	0.276786	0.190476	0.184524
CCNA_01717	0.10311	0.232406	0.189853	0.216039	0.258592
CCNA_00629	0.0746269	0.0746269	0.149254	0.492537	0.208955
CCNA_01841	0.0769231	0.269231	0.230769	0.192308	0.230769
perB	0.184874	0.226891	0.238095	0.173669	0.176471
CCNA_01843	0.129032	0.258065	0.16129	0.193548	0.258065
CCNA_01845	0.308511	0.191489	0.180851	0.138298	0.180851
CCNA_01844	0.29	0.16	0.21	0.15	0.19
CCNA_01847	0.189655	0.172414	0.137931	0.189655	0.310345
CCNA_01846	0.257143	0.171429	0.157143	0.171429	0.242857
CCNA_02710	0.0817308	0.283654	0.240385	0.182692	0.211538
CCNA_02247	0.254098	0.237705	0.139344	0.172131	0.196721
CCNA_02244	0.151923	0.190385	0.178846	0.215385	0.263462
CCNA_02245	0.113537	0.257642	0.179039	0.200873	0.248908
CCNA_02242	0.484495	0.146948	0.112384	0.142801	0.113372
CCNA_02243	0.105263	0.163743	0.154971	0.345029	0.230994
CCNA_02240	0.243243	0.232432	0.140541	0.197297	0.186486
CCNA_02241	0.209596	0.207071	0.186869	0.20202	0.194444
CCNA_02088	0.125828	0.213024	0.209713	0.228477	0.222958
CCNA_02089	0.149123	0.315789	0.157895	0.175439	0.201754
CCNA_03621	0.133333	0.266667	0.2	0.2	0.2
perP	0.213881	0.0325779	0.0509915	0.372521	0.330028
CCNA_03627	0.180556	0.243056	0.194444	0.201389	0.180556
CCNA_03626	0.186667	0.213333	0.196667	0.19	0.213333
CCNA_03624	0.731563	0.123894	0.0678466	0.0294985	0.0471976
CCNA_02080	0.183585	0.210583	0.228942	0.173866	0.203024
CCNA_02081	0.227273	0.209677	0.192082	0.175953	0.195015
CCNA_02082	0.184042	0.254046	0.174633	0.218291	0.168988
CCNA_03628	0.18232	0.251381	0.20442	0.165746	0.196133
CCNA_02085	0.0566038	0.271012	0.291595	0.204117	0.176672
CCNA_02087	0.156364	0.133333	0.195152	0.287273	0.227879
CCNA_02339	0.0319361	0.304724	0.269461	0.184963	0.208916
ybgT	0.113783	0.0893601	0.074593	0.593147	0.129118
CCNA_03247	0.0351226	0.0125911	0.242545	0.530152	0.179589
lovK	0.0690476	0.304762	0.247619	0.161905	0.216667
CCNA_03246	0.0862745	0.0470588	0.207843	0.423529	0.235294
CCNA_03631	0.120482	0.156627	0.349398	0.180723	0.192771
CCNA_00538	0.0526316	0.0361842	0.230263	0.434211	0.246711
lovR	0.0761589	0.281457	0.228477	0.172185	0.241722
ybgF	0.170404	0.210762	0.233184	0.188341	0.197309
CCNA_00532	0.237113	0.453608	0.14433	0.0721649	0.0927835
CCNA_00530	0.169439	0.206702	0.24015	0.166356	0.217353
CCNA_00531	0.184228	0.18451	0.221167	0.208196	0.201899
CCNA_00536	0.240867	0.173405	0.215782	0.183147	0.1868
CCNA_00537	0.216764	0.15376	0.228202	0.190512	0.210763
CCNA_00534	0.0236686	0.390533	0.171598	0.171598	0.242604
CCNA_00535	0.0861244	0.344498	0.229665	0.129187	0.210526
CCNA_03326	0.149333	0.04	0.144	0.389333	0.277333
CCNA_00792	0.1	0.3	0.166667	0.233333	0.2
yihA	0.216306	0.22629	0.214642	0.178037	0.164725
CCNA_02668	0.3	0.2	0.15	0.15	0.2
CCNA_02669	0.1	0.266667	0.233333	0.166667	0.233333
CCNA_02666	0.0368098	0.0122699	0.429448	0.404908	0.116564
CCNA_02660	0.0551181	0.181102	0.232283	0.251969	0.279528
CCNA_02661	0.105845	0.224329	0.183254	0.244866	0.241706
CCNA_02662	0.09	0.236667	0.17	0.246667	0.256667
crfA	0.0910679	0.14995	0.209165	0.259897	0.28992
CCNA_02398	0.150943	0.245283	0.226415	0.226415	0.150943
CCNA_02399	0.102564	0.230769	0.24359	0.192308	0.230769
CCNA_02394	0.0547945	0.342466	0.226027	0.178082	0.19863
CCNA_02395	0.0397143	0.283143	0.265143	0.182286	0.229714
CCNA_02396	0.0980392	0.215686	0.294118	0.196078	0.196078
CCNA_02397	0.134615	0.25	0.153846	0.211538	0.25
CCNA_02390	0.178295	0.248062	0.178295	0.186047	0.209302
CCNA_02391	0.3	0.2	0.1	0.1	0.3
CCNA_02392	0.0789474	0.210526	0.184211	0.184211	0.342105
CCNA_03324	0.0580524	0.308989	0.301498	0.161049	0.170412
CCNA_02579	0.0141844	0.0780142	0.248227	0.368794	0.29078
CCNA_02048	0.171866	0.25468	0.22717	0.184628	0.161656
dxs	0.212766	0.220213	0.159574	0.17766	0.229787
CCNA_03920	0.0821168	0.206204	0.259124	0.229927	0.222628
CCNA_03921	0.175194	0.16124	0.234109	0.19845	0.231008
CCNA_03922	0.177989	0.16712	0.191576	0.258152	0.205163
CCNA_03923	0.369668	0.127962	0.241706	0.170616	0.0900474
CCNA_03924	0.1425	0.22375	0.21625	0.2125	0.205
CCNA_03925	0.201389	0.173611	0.194444	0.229167	0.201389
CCNA_03926	0.112676	0.239437	0.183099	0.295775	0.169014
CCNA_03927	0.0576923	0.0961538	0.192308	0.375	0.278846
CCNA_03928	0.0595611	0.163009	0.203762	0.31348	0.260188
CCNA_03929	0.0585683	0.142082	0.304772	0.259219	0.235358
purH	0.211174	0.256629	0.14678	0.185606	0.199811
CCNA_03325	0.0234752	0.439322	0.250441	0.127778	0.158984
CCNA_03113	0.227273	0.159091	0.113636	0.295455	0.204545
CCNA_02061	0.305155	0.043299	0.0103093	0.208247	0.43299
CCNA_02435	0.20028	0.240896	0.166667	0.182073	0.210084
CCNA_00428	0.0714286	0.270059	0.258317	0.178082	0.222114
pbpC	0.203947	0.276316	0.177632	0.177632	0.164474
CCNA_00828	0.0847458	0.169492	0.20339	0.254237	0.288136
CCNA_00398	0.151515	0.249471	0.200141	0.207893	0.19098
CCNA_00399	0.0988372	0.244186	0.186047	0.25	0.22093
CCNA_00396	0.0441176	0.205882	0.264706	0.205882	0.279412
CCNA_00397	0.121212	0.252525	0.20202	0.212121	0.212121
CCNA_00394	0.0859375	0.234375	0.195312	0.234375	0.25
CCNA_00395	0.129412	0.235294	0.188235	0.211765	0.235294
CCNA_00392	0.170968	0.229032	0.209677	0.190323	0.2
CCNA_00393	0.0625	0.21875	0.28125	0.1875	0.25
CCNA_00390	0.0387324	0.383803	0.235915	0.151408	0.190141
CCNA_00391	0.0141844	0.390071	0.219858	0.177305	0.198582
CCNA_02434	0.212	0.266	0.168	0.176	0.178
cpdR	0.0750552	0.139073	0.161148	0.350993	0.273731
CCNA_01062	0.218045	0.205514	0.218045	0.180451	0.177945
divL	0.0514286	0.32	0.257143	0.2	0.171429
divK	0.0379501	0.0249307	0.325485	0.420222	0.191413
CCNA_01066	0.172324	0.177546	0.266319	0.198433	0.185379
CCNA_01065	0.180085	0.15678	0.243644	0.21822	0.201271
CCNA_01064	0.196841	0.172539	0.238153	0.212637	0.17983
CCNA_01069	0.0955882	0.208333	0.215686	0.262255	0.218137
CCNA_01068	0.197802	0.230769	0.164835	0.186813	0.21978
spoT	0.201044	0.180157	0.208877	0.195822	0.214099
CCNA_00059	0.172023	0.20794	0.198488	0.194707	0.226843
alkB	0.208333	0.291667	0.208333	0.125	0.166667
sucD	0.194795	0.220548	0.21726	0.185753	0.181644
CCNA_01501	0.166667	0.333333	0.333333	0	0.166667
CCNA_00423	0.129032	0.225806	0.225806	0.193548	0.225806
CCNA_00794	0.125	0.125	0.125	0.375	0.25
CCNA_02897	0.111111	0.222222	0.222222	0.222222	0.222222
CCNA_02896	0.0666667	0.233333	0.216667	0.233333	0.25
CCNA_02895	0.0153846	0.169231	0.276923	0.292308	0.246154
CCNA_02894	0.2	0.2	0.2	0.2	0.2
CCNA_02893	0.142857	0.142857	0.285714	0.142857	0.285714
CCNA_02892	0.0540541	0.243243	0.243243	0.216216	0.243243
CCNA_02891	0.0625	0.25	0.25	0.1875	0.25
CCNA_00843	0.107143	0.160714	0.267857	0.232143	0.232143
uvrD	0.070122	0.256098	0.323171	0.161585	0.189024
CCNA_00429	0.16095	0.195251	0.274406	0.189974	0.17942
CCNA_02899	0.107143	0.178571	0.261905	0.22619	0.22619
CCNA_02898	0.0625	0.1875	0.1875	0.25	0.3125
CCNA_00841	0.0769231	0.230769	0.230769	0.153846	0.307692
flbD	0.0308123	0.0112045	0.543417	0.268908	0.145658
flbE	0.0283688	0.0141844	0.602837	0.212766	0.141844
flbA	0.00492611	0.0591133	0.438424	0.35468	0.142857
CCNA_00847	0.251142	0.123288	0.269406	0.164384	0.191781
CCNA_03112	0.193396	0.183962	0.198113	0.221698	0.20283
flbY	0.0348837	0.0116279	0.406977	0.434109	0.112403
flbT	0.0831021	0.0653983	0.285242	0.328049	0.238208
CCNA_00337	0.136842	0.221053	0.244737	0.176316	0.221053
CCNA_03942	0.132653	0.0969388	0.219388	0.362245	0.188776
terB	0	0.454545	0.363636	0.0909091	0.0909091
CCNA_01478	0.166667	0.22619	0.178571	0.196429	0.232143
CCNA_01479	0.0572519	0.30916	0.267176	0.19084	0.175573
CCNA_01272	0.254237	0.237288	0.152542	0.169492	0.186441
CCNA_01273	0.126482	0.229249	0.197628	0.213439	0.233202
CCNA_01270	0.0357143	0.214286	0.321429	0.178571	0.25
CCNA_01271	0.0360825	0.268041	0.273196	0.229381	0.193299
CCNA_01276	0.146497	0.350318	0.146497	0.191083	0.165605
CCNA_01277	0.0659898	0.286802	0.172589	0.213198	0.261421
CCNA_01274	0.0298507	0.298507	0.208955	0.19403	0.268657
CCNA_01275	0.136585	0.287805	0.192683	0.168293	0.214634
CCNA_01278	0.0778968	0.0574489	0.242454	0.371957	0.250243
CCNA_01279	0.0714286	0.255102	0.255102	0.229592	0.188776
lexA	0.0394537	0.135053	0.364188	0.286798	0.174507
cobQ	0.164577	0.278205	0.198949	0.160129	0.19814
metK	0.0487157	0.261957	0.230292	0.250221	0.208813
CCNA_03409	0.132075	0.216981	0.207547	0.245283	0.198113
CCNA_03408	0.0451713	0.275701	0.26947	0.213396	0.196262
CCNA_00019	0.047619	0.238095	0.190476	0.238095	0.285714
CCNA_01158	0.153153	0.036036	0.117117	0.441441	0.252252
CCNA_00013	0.10303	0.151515	0.224242	0.278788	0.242424
CCNA_02321	0.218684	0.282378	0.154989	0.144374	0.199575
CCNA_03567	0.147059	0.205882	0.176471	0.235294	0.235294
CCNA_01386	0.411122	0.157895	0.229394	0.103277	0.0983118
CCNA_02878	0.140625	0.546875	0.140625	0.046875	0.125
CCNA_01384	0.0285714	0.219048	0.180952	0.247619	0.32381
CCNA_01385	0.139423	0.254808	0.192308	0.182692	0.230769
CCNA_01382	0.0857143	0.161905	0.185714	0.257143	0.309524
CCNA_01383	0.0599613	0.193424	0.210832	0.245648	0.290135
CCNA_01381	0.19561	0.21756	0.209813	0.176888	0.200129
CCNA_02870	0.6	0.4	0	0	0
CCNA_02873	0.137056	0.233503	0.192893	0.218274	0.218274
CCNA_02872	0.314286	0.285714	0.114286	0.142857	0.142857
CCNA_02874	0.833333	0	0.166667	0	0
CCNA_02877	0.25	0.25	0	0.25	0.25
CCNA_01389	0.166667	0.190476	0.214286	0.190476	0.238095
CCNA_03728	0.323296	0.231379	0.191759	0.123613	0.129952
CCNA_03729	0.186027	0.26936	0.206229	0.159091	0.179293
CCNA_03726	0.55	0.128571	0.15	0.075	0.0964286
CCNA_03407	0.0529248	0.278552	0.284123	0.220056	0.164345
CCNA_03724	0.111111	0.31746	0.15873	0.174603	0.238095
CCNA_03725	0.075	0.3	0.175	0.175	0.275
CCNA_03723	0.0714286	0.178571	0.178571	0.25	0.321429
CCNA_00320	0.260971	0.213318	0.198645	0.167594	0.159472
CCNA_01658	0.308108	0.243243	0.156757	0.145946	0.145946
CCNA_00700	0.222222	0.222222	0.222222	0.111111	0.222222
CCNA_00703	0.0876897	0.0556492	0.621417	0.0750422	0.160202
CCNA_00467	0.188934	0.126181	0.226046	0.257085	0.201754
CCNA_00705	0.260563	0.311871	0.151911	0.157948	0.117706
CCNA_00704	0.0972803	0.0690377	0.574268	0.084728	0.174686
CCNA_00707	0.173077	0.230769	0.269231	0.153846	0.173077
CCNA_00706	0.4	0	0.2	0.4	0
CCNA_00709	0.126984	0.269841	0.222222	0.190476	0.190476
CCNA_00708	0.18732	0.227666	0.216138	0.164265	0.204611
CCNA_01652	0.0821326	0.242555	0.251681	0.204611	0.21902
CCNA_01653	0.166667	0.212644	0.235632	0.183908	0.201149
CCNA_01654	0.162939	0.246006	0.223642	0.182109	0.185304
CCNA_01655	0.28371	0.226358	0.149481	0.19097	0.149481
CCNA_01656	0.194093	0.248945	0.172996	0.177215	0.206751
CCNA_01657	0.0808081	0.156566	0.212121	0.267677	0.282828
hfaD	0.039801	0.0149254	0.293532	0.477612	0.174129
CCNA_01498	0.102564	0.205128	0.153846	0.205128	0.333333
pleD	0.0533563	0.0309811	0.282272	0.435456	0.197935
pleC	0.0407407	0.311111	0.288889	0.177778	0.181481
pleA	0.00425532	0.0212766	0.625532	0.229787	0.119149
hfaB	0.0454545	0.0176768	0.267677	0.5	0.169192
CCNA_01492	0.0331492	0.225138	0.196133	0.279006	0.266575
CCNA_01493	0.0939597	0.288591	0.234899	0.181208	0.201342
CCNA_01490	0.288136	0.20339	0.158192	0.180791	0.169492
CCNA_01491	0.0635452	0.250836	0.19398	0.250836	0.240803
CCNA_01496	0.183133	0.195181	0.204819	0.212048	0.204819
CCNA_01497	0.199357	0.241158	0.186495	0.192926	0.180064
CCNA_01494	0.174194	0.206452	0.174194	0.219355	0.225806
gidA	0.216714	0.172805	0.160057	0.201133	0.249292
gidB	0.263441	0.172043	0.11828	0.198925	0.247312
CCNA_R0059	0.203711	0.177851	0.20568	0.199288	0.21347
CCNA_R0058	0.189945	0.301638	0.125341	0.166288	0.216788
CCNA_R0057	0.159176	0.224879	0.187855	0.195639	0.232451
CCNA_R0056	0.174082	0.151295	0.250056	0.196898	0.22767
CCNA_R0055	0.177322	0.15727	0.275684	0.125191	0.264533
CCNA_R0054	0.216683	0.258863	0.144673	0.172527	0.207254
CCNA_R0053	0.274522	0.159379	0.20694	0.184464	0.174696
CCNA_R0052	0.227708	0.180009	0.161227	0.231892	0.199163
CCNA_R0051	0.119565	0.282609	0.173913	0.206522	0.217391
CCNA_R0050	0.0443412	0.661318	0.184122	0.0422297	0.0679899
CCNA_03432	0.0612245	0.326531	0.285714	0.142857	0.183673
CCNA_03433	0.0952381	0.238095	0.238095	0.214286	0.214286
CCNA_03430	0.312633	0.166639	0.186957	0.175815	0.157955
CCNA_03431	0.0945455	0.232727	0.254545	0.185455	0.232727
CCNA_03436	0.132075	0.245283	0.245283	0.226415	0.150943
CCNA_03389	0.0793651	0.206349	0.222222	0.174603	0.31746
CCNA_03434	0.153247	0.236364	0.223377	0.187013	0.2
CCNA_03435	0.119835	0.239669	0.214876	0.190083	0.235537
CCNA_03384	0.221376	0.20957	0.224017	0.16343	0.181606
CCNA_03385	0.208158	0.164557	0.255977	0.174402	0.196906
CCNA_03438	0.156028	0.241135	0.22695	0.177305	0.198582
CCNA_03387	0.223684	0.223684	0.210526	0.184211	0.157895
CCNA_03380	0.0807175	0.246637	0.242152	0.219731	0.210762
CCNA_03381	0.0909091	0.227273	0.181818	0.272727	0.227273
CCNA_03382	0.0902062	0.224227	0.226804	0.216495	0.242268
CCNA_03383	0.175182	0.211679	0.19708	0.20438	0.211679
nepR	0.114523	0.346129	0.180422	0.159309	0.199616
CCNA_03769	0.217391	0.252717	0.154891	0.1875	0.1875
kdpE	0.184049	0.226994	0.208589	0.171779	0.208589
kdpD	0.152174	0.217391	0.228261	0.195652	0.206522
CCNA_02527	0.219178	0.181996	0.240705	0.158513	0.199609
CCNA_02526	0.190476	0.244898	0.207483	0.153061	0.204082
CCNA_00637	0.0852273	0.210227	0.244318	0.232955	0.227273
CCNA_00636	0.0669216	0.209688	0.266412	0.274697	0.182282
CCNA_02523	0.0281899	0.526706	0.222552	0.127596	0.0949555
CCNA_02522	0.0551181	0.278215	0.244094	0.246719	0.175853
CCNA_02521	0.206573	0.187793	0.201878	0.215962	0.187793
CCNA_02520	0.218803	0.262393	0.150427	0.169231	0.199145
CCNA_01724	0.185312	0.227156	0.244236	0.151153	0.192143
CCNA_01726	0.292308	0.2	0.165385	0.165385	0.176923
CCNA_01727	0.047619	0.0744048	0.39881	0.315476	0.16369
CCNA_00639	0.125	0.210227	0.261364	0.215909	0.1875
CCNA_01721	0.0899743	0.233933	0.14653	0.251928	0.277635
CCNA_01722	0.0963855	0.259036	0.13253	0.23494	0.277108
CCNA_02528	0.117171	0.196544	0.217063	0.220302	0.24892
CCNA_01874	0.1	0.228571	0.214286	0.242857	0.214286
CCNA_01875	0.130435	0.173913	0.26087	0.173913	0.26087
CCNA_01876	0.2	0.2	0.2	0.2	0.2
CCNA_01877	0.02	0.36	0.26	0.2	0.16
CCNA_02259	0.25	0.210526	0.171053	0.171053	0.197368
serS	0.106043	0.267959	0.251995	0.194983	0.179019
CCNA_02709	0.0574273	0.203675	0.206738	0.267994	0.264165
CCNA_02708	0.142857	0.125714	0.251429	0.24	0.24
CCNA_02254	0.512987	0.121212	0.0930736	0.127706	0.145022
CCNA_02257	0.138249	0.0253456	0.308756	0.343318	0.184332
CCNA_02704	0.30033	0.207921	0.158416	0.178218	0.155116
CCNA_02251	0.257005	0.170048	0.101449	0.312077	0.15942
CCNA_02250	0.319635	0.16895	0.109589	0.26484	0.136986
CCNA_02701	0.482759	0.103448	0.0862069	0.224138	0.103448
CCNA_02700	0.588235	0.117647	0.0588235	0.117647	0.117647
CCNA_03656	0.149533	0.227894	0.227175	0.186197	0.209202
CCNA_03657	0.229645	0.2119	0.217119	0.176409	0.164927
CCNA_03655	0.145078	0.248705	0.196891	0.19171	0.217617
CCNA_03652	0.107143	0.196429	0.303571	0.160714	0.232143
CCNA_03653	0.0844928	0.331267	0.233114	0.164432	0.186694
CCNA_02099	0.195122	0.223577	0.186992	0.186992	0.207317
CCNA_03651	0.125	0.229167	0.25	0.1875	0.208333
CCNA_01870	0.202899	0.246377	0.144928	0.188406	0.217391
CCNA_02096	0.11194	0.261194	0.261194	0.171642	0.19403
CCNA_02095	0.149425	0.137931	0.149425	0.264368	0.298851
CCNA_02094	0.0987306	0.231312	0.196051	0.228491	0.245416
CCNA_02093	0.0348259	0.288557	0.20398	0.223881	0.248756
CCNA_02092	0.18797	0.233083	0.210526	0.165414	0.203008
CCNA_02091	0.0364583	0.320312	0.283854	0.161458	0.197917
CCNA_02090	0.101124	0.235955	0.224719	0.216292	0.22191
CCNA_01151	0.12069	0.241379	0.189655	0.224138	0.224138
CCNA_02530	0.0358974	0.348718	0.241026	0.189744	0.184615
CCNA_00529	0.118644	0.254237	0.20339	0.152542	0.271186
CCNA_00528	0.147541	0.278689	0.262295	0.163934	0.147541
CCNA_02418	0	0.2	0.3	0.2	0.3
CCNA_02413	0.0967742	0.195015	0.183284	0.27566	0.249267
CCNA_00520	0.289668	0.164207	0.210332	0.151292	0.184502
CCNA_00523	0.192469	0.192469	0.246862	0.16318	0.205021
CCNA_02410	0.255814	0.116279	0.116279	0.232558	0.27907
CCNA_02417	0.0434783	0.25	0.282609	0.195652	0.228261
ppx1	0.290323	0.232258	0.2	0.129032	0.148387
CCNA_02415	0.153539	0.224826	0.19342	0.209372	0.218843
CCNA_02414	0.116592	0.197309	0.188341	0.269058	0.2287
CCNA_02531	0.157895	0.315789	0.263158	0.105263	0.157895
CCNA_02673	0.154639	0.226804	0.247423	0.170103	0.201031
CCNA_02672	0.0930931	0.207207	0.186186	0.273273	0.24024
CCNA_02671	0.179381	0.085567	0.0793814	0.342268	0.313402
CCNA_02670	0.172662	0.165468	0.165468	0.244604	0.251799
CCNA_02677	0.0283019	0.122642	0.150943	0.226415	0.471698
CCNA_02676	0.0622478	0.24438	0.280692	0.201153	0.211527
CCNA_02675	0.0714286	0.0714286	0.321429	0.321429	0.214286
CCNA_02674	0.04	0.22	0.26	0.28	0.2
CCNA_02679	0.0789474	0.258772	0.214912	0.236842	0.210526
CCNA_02678	0.0970464	0.324895	0.21097	0.189873	0.177215
CCNA_02383	0.108434	0.228916	0.216867	0.216867	0.228916
CCNA_02382	0	0.5	0.235294	0.147059	0.117647
CCNA_02381	0	0.510638	0.234043	0.12766	0.12766
CCNA_02380	0.229268	0.238049	0.15122	0.186341	0.195122
CCNA_02387	0.139394	0.284848	0.231515	0.172121	0.172121
CCNA_02386	0.157692	0.265385	0.238462	0.161538	0.176923
CCNA_02385	0.039834	0.227386	0.259751	0.223237	0.249793
CCNA_02384	0.130499	0.244868	0.192082	0.211144	0.221408
CCNA_02532	0.126496	0.152991	0.157265	0.25812	0.305128
CCNA_02389	0.123007	0.284738	0.225513	0.166287	0.200456
CCNA_02388	0.12844	0.311927	0.181193	0.176606	0.201835
CCNA_01757	0.168067	0.226891	0.201681	0.193277	0.210084
CCNA_01303	0.0921986	0.217494	0.193853	0.250591	0.245863
CCNA_01756	0.210784	0.186275	0.313725	0.142157	0.147059
CCNA_01751	0.145679	0.28642	0.217284	0.177778	0.17284
parD-4	0.105121	0.225517	0.268643	0.179695	0.221024
parD-2	0.110645	0.273261	0.237217	0.191953	0.186924
parD-3	0.0896204	0.363287	0.229938	0.149688	0.167468
parD-1	0.15625	0.274306	0.270833	0.145833	0.152778
gyrB	0.0824053	0.301782	0.24833	0.191537	0.175947
CCNA_03943	0.0516432	0.0704225	0.201878	0.211268	0.464789
CCNA_03937	0.119748	0.184874	0.302521	0.186975	0.205882
CCNA_03936	0.171806	0.156388	0.229075	0.22467	0.218062
CCNA_03935	0.0890411	0.123288	0.260274	0.232877	0.294521
CCNA_03934	0.103896	0.246753	0.12987	0.337662	0.181818
CCNA_03933	0.0180935	0.119214	0.29169	0.335788	0.235216
CCNA_03932	0.018816	0.122396	0.309896	0.315471	0.233421
CCNA_03931	0.0270033	0.0941127	0.362667	0.2983	0.217917
CCNA_03930	0.0641734	0.159371	0.348491	0.224394	0.20357
CCNA_03939	0.03125	0.109375	0.1875	0.390625	0.28125
CCNA_03938	0.0438513	0.219256	0.215443	0.280267	0.241182
CCNA_03365	0.22449	0.421769	0.176871	0.0952381	0.0816327
brnT	0.17971	0.202899	0.266667	0.17971	0.171014
CCNA_03362	0.165049	0.339806	0.18123	0.152104	0.161812
CCNA_03363	0.208333	0.448718	0.150641	0.112981	0.0793269
CCNA_00389	0.126582	0.303797	0.227848	0.126582	0.21519
qor	0.167539	0.240838	0.188482	0.198953	0.204188
CCNA_00839	0.136605	0.181698	0.160477	0.286472	0.234748
CCNA_00838	0.0769231	0.153846	0.2	0.261538	0.307692
CCNA_00385	0.133333	0.228571	0.2	0.190476	0.247619
CCNA_00384	0.116667	0.261111	0.194444	0.216667	0.211111
CCNA_00387	0.241379	0.206897	0.189655	0.172414	0.189655
CCNA_00386	0.0628141	0.271357	0.286432	0.180905	0.198492
CCNA_00381	0.105263	0.263158	0.263158	0.105263	0.263158
CCNA_00832	0.0886076	0.158228	0.259494	0.221519	0.272152
CCNA_00383	0.0627306	0.243542	0.335793	0.166052	0.191882
CCNA_00830	0	0.2	0.333333	0.266667	0.2
CCNA_01931	0	0.0869565	0.347826	0.26087	0.304348
CCNA_00203	0.118852	0.0286885	0.155738	0.422131	0.27459
CCNA_01016	0.088	0.256	0.16	0.256	0.24
CCNA_01017	0.0769231	0.145299	0.17094	0.282051	0.324786
CCNA_01014	0.188679	0.169811	0.339623	0.132075	0.169811
CCNA_01015	0.045929	0.22547	0.185804	0.269311	0.273486
CCNA_01012	0.259259	0.259259	0.148148	0.148148	0.185185
CCNA_01013	0.2	0.133333	0.2	0.2	0.266667
CCNA_01010	0.333333	0.166667	0.166667	0.166667	0.166667
CCNA_01011	0.208333	0.291667	0.166667	0.166667	0.166667
CCNA_01018	0.135135	0.162162	0.27027	0.202703	0.22973
CCNA_01019	0.122449	0.156463	0.217687	0.265306	0.238095
CCNA_01930	0.163934	0.295082	0.180328	0.196721	0.163934
leuD	0.043222	0.232482	0.305828	0.211526	0.206942
leuB	0.07109	0.265403	0.246445	0.194313	0.222749
leuC	0.0416667	0.291667	0.255631	0.20045	0.210586
CCNA_02431	0.179372	0.192825	0.170404	0.237668	0.219731
CCNA_00591	0.079558	0.209945	0.258564	0.241989	0.209945
idhA	0.142857	0.205882	0.231092	0.197479	0.222689
CCNA_02548	0.071066	0.248731	0.258883	0.187817	0.233503
tfoX	0.173913	0.26087	0.195652	0.195652	0.173913
CCNA_02044	0.0754717	0.188679	0.264151	0.207547	0.264151
CCNA_01128	0.591116	0.178815	0.023918	0.107062	0.0990888
CCNA_02597	0.419355	0.215054	0.193548	0.0860215	0.0860215
CCNA_01122	0.128467	0.226277	0.176642	0.227737	0.240876
CCNA_01120	0.0219298	0.214912	0.175439	0.188596	0.399123
CCNA_01121	0.0714286	0.227575	0.19103	0.247508	0.262458
CCNA_02046	0.393152	0.344156	0.0997639	0.079693	0.0832349
CCNA_01124	0.178571	0.464286	0.0714286	0.142857	0.142857
CCNA_01125	0.0361991	0.375566	0.312217	0.113122	0.162896
CCNA_02047	0.323285	0.246717	0.147956	0.142593	0.139449
dksA	0.186231	0.226597	0.243437	0.19366	0.150074
CCNA_02040	0.0833333	0.276235	0.265432	0.182099	0.192901
CCNA_02638	0.0232558	0.395349	0.27907	0.162791	0.139535
CCNA_03103	0.244604	0.18705	0.201439	0.136691	0.230216
CCNA_02042	0.278234	0.255178	0.157483	0.15592	0.153185
CCNA_02591	0.135149	0.217915	0.185961	0.225249	0.235726
CCNA_01466	0.0150094	0.157598	0.0731707	0.527205	0.227017
CCNA_01465	0.0357143	0.0255102	0.147959	0.566327	0.22449
CCNA_01464	0.121839	0.133333	0.181609	0.31954	0.243678
CCNA_01463	0.102679	0.169643	0.116071	0.276786	0.334821
CCNA_01462	0.0833333	0.152778	0.125	0.263889	0.375
CCNA_01461	0.184615	0.153846	0.261538	0.2	0.2
CCNA_01460	0.0925926	0.231481	0.25	0.157407	0.268519
CCNA_R0134	0.024	0.424	0.36	0.088	0.104
CCNA_R0150	0.0869565	0.304348	0.195652	0.163043	0.25
mopB	0.102564	0.25641	0.282051	0.179487	0.179487
CCNA_01261	0.208609	0.231788	0.182119	0.172185	0.205298
CCNA_01260	0.121622	0.202703	0.162162	0.297297	0.216216
CCNA_01263	0.458824	0.105882	0.117647	0.164706	0.152941
CCNA_R0151	0.115464	0.250172	0.196564	0.173883	0.263918
CCNA_01265	0.125	0.225	0.275	0.125	0.25
CCNA_01264	0.0540541	0.135135	0.297297	0.324324	0.189189
CCNA_01267	0.0794165	0.241491	0.23825	0.235008	0.205835
CCNA_01266	0.123457	0.237654	0.240741	0.225309	0.17284
CCNA_01269	0	0.347826	0.217391	0.26087	0.173913
CCNA_01268	0.0590717	0.21519	0.248945	0.240506	0.236287
CCNA_02049	0.136752	0.230769	0.230769	0.145299	0.25641
CCNA_02097	0.143603	0.292428	0.154047	0.221932	0.18799
CCNA_03067	0.0416667	0.208333	0.208333	0.25	0.291667
CCNA_R0155	0.1	0.15	0.25	0.4	0.1
CCNA_00363	0.0526316	0.210526	0.157895	0.263158	0.315789
CCNA_00020	0.0910161	0.286387	0.216163	0.198509	0.207925
CCNA_00021	0.0688073	0.233945	0.201835	0.229358	0.266055
CCNA_00022	0.0404798	0.293853	0.175412	0.190405	0.29985
CCNA_00023	0.0707547	0.259434	0.245283	0.188679	0.235849
CCNA_00024	0.08	0.36	0.2	0.2	0.16
CCNA_00025	0.0688406	0.248188	0.253623	0.226449	0.202899
CCNA_00026	0.0875912	0.0364964	0.178832	0.437956	0.259124
CCNA_00027	0.0187793	0.258216	0.112676	0.328638	0.28169
CCNA_00028	0.0113475	0.212766	0.0836879	0.347518	0.344681
CCNA_00029	0.11087	0.204348	0.197826	0.195652	0.291304
pssY	0.1375	0.225	0.2475	0.1775	0.2125
ccmA	0.153061	0.234694	0.255102	0.142857	0.214286
CCNA_03181	0.0978648	0.16548	0.209964	0.215302	0.311388
CCNA_03126	0.113636	0.227273	0.181818	0.204545	0.272727
ccmB	0.122449	0.183673	0.244898	0.204082	0.244898
lpxI	0.181818	0.263636	0.245455	0.140909	0.168182
lpxK	0.178082	0.219178	0.232877	0.164384	0.205479
lpxA	0.119777	0.258357	0.249304	0.170613	0.20195
lpxB	0.172269	0.239496	0.235294	0.159664	0.193277
lpxC	0.486891	0.161049	0.142322	0.108614	0.101124
lpxD	0.153719	0.26281	0.242975	0.155372	0.185124
CCNA_01394	0.179775	0.224719	0.157303	0.213483	0.224719
CCNA_01397	0.132075	0.240566	0.216981	0.183962	0.226415
CCNA_01396	0.115385	0.239645	0.195266	0.192308	0.257396
CCNA_01391	0.117117	0.18018	0.288288	0.225225	0.189189
CCNA_01390	0.121739	0.217391	0.182609	0.243478	0.234783
CCNA_01393	0.114961	0.229921	0.168504	0.253543	0.233071
CCNA_01392	0.136364	0.272727	0.181818	0.212121	0.19697
CCNA_02845	0.0602273	0.334091	0.231818	0.176136	0.197727
CCNA_02846	0.0939775	0.154864	0.264064	0.244871	0.242224
CCNA_02847	0.143266	0.17192	0.232092	0.272206	0.180516
CCNA_01399	0.202722	0.654571	0.0484997	0.0453594	0.0488486
CCNA_01398	0.140097	0.231884	0.21256	0.21256	0.202899
CCNA_02842	0.106918	0.283019	0.226415	0.18239	0.201258
CCNA_03739	0.0202899	0.553623	0.211594	0.0956522	0.118841
CCNA_03738	0.0625	0.0625	0.178571	0.428571	0.267857
CCNA_03735	0.292174	0.217391	0.170435	0.170435	0.149565
CCNA_03737	0.182692	0.182692	0.192308	0.240385	0.201923
CCNA_03736	0.197306	0.228956	0.185185	0.183838	0.204714
CCNA_03731	0.193333	0.273333	0.18	0.166667	0.186667
CCNA_03730	0.125714	0.325714	0.205714	0.148571	0.194286
CCNA_03733	0.175657	0.224066	0.236515	0.186722	0.17704
CCNA_03732	0.137255	0.248366	0.212418	0.199346	0.202614
acrB	0.204698	0.208054	0.231544	0.177852	0.177852
CCNA_00734	0.0598291	0.205128	0.179487	0.260684	0.294872
ctpA	0.198795	0.240964	0.228916	0.168675	0.162651
CCNA_00736	0.169655	0.177931	0.215172	0.204138	0.233103
CCNA_00730	0.141304	0.0869565	0.195652	0.358696	0.217391
CCNA_03366	0.26195	0.367113	0.173996	0.124283	0.0726577
CCNA_00732	0.104046	0.346821	0.219653	0.16185	0.16763
CCNA_00733	0.08	0.216	0.328	0.16	0.216
CCNA_01647	0.10989	0.274725	0.263736	0.164835	0.186813
CCNA_01646	0.138122	0.298343	0.232044	0.154696	0.176796
CCNA_01645	0.126761	0.271127	0.225352	0.193662	0.183099
CCNA_01644	0.0154083	0.0107858	0.298921	0.503852	0.171032
CCNA_00738	0.0776699	0.456311	0.213592	0.0970874	0.15534
CCNA_01642	0.149606	0.204724	0.204724	0.204724	0.23622
CCNA_01641	0.0757576	0.227273	0.181818	0.272727	0.242424
CCNA_01640	0.107143	0.196429	0.214286	0.232143	0.25
iolD	0.0769231	0.205128	0.25641	0.230769	0.230769
iolE	0.0804598	0.241379	0.206897	0.252874	0.218391
CCNA_00575	0.21875	0.1875	0.21875	0.1875	0.1875
iolA	0.0847458	0.186441	0.237288	0.237288	0.254237
iolB	0.102041	0.265306	0.204082	0.183673	0.244898
iolC	0.0967742	0.225806	0.225806	0.258065	0.193548
CCNA_01481	0.0297872	0.378723	0.289362	0.148936	0.153191
CCNA_01480	0.0271759	0.373852	0.29159	0.152038	0.155343
CCNA_01483	0.148148	0.314815	0.259259	0.148148	0.12963
CCNA_01362	0.164557	0.265823	0.189873	0.189873	0.189873
CCNA_01485	0.0873786	0.213592	0.203883	0.252427	0.242718
CCNA_01484	0.149425	0.252874	0.298851	0.149425	0.149425
CCNA_01487	0.0720339	0.245763	0.228814	0.220339	0.233051
CCNA_01486	0.186813	0.164835	0.197802	0.21978	0.230769
CCNA_03367	0.172065	0.269231	0.194332	0.255061	0.109312
CCNA_00570	0	0.142857	0.428571	0.142857	0.285714
CCNA_00571	0.0909091	0.181818	0.272727	0.181818	0.272727
CCNA_R0182	0.363913	0.193043	0.155217	0.128696	0.15913
CCNA_03393	0.138095	0.252381	0.219048	0.185714	0.204762
CCNA_03420	0.121951	0.170732	0.170732	0.292683	0.243902
CCNA_03391	0.132075	0.188679	0.226415	0.169811	0.283019
CCNA_03422	0.186916	0.224299	0.196262	0.186916	0.205607
CCNA_03425	0.05	0	0.05	0.65	0.25
CCNA_03396	0.0873016	0.214286	0.230159	0.238095	0.230159
CCNA_03395	0.021875	0.071875	0.3375	0.403125	0.165625
CCNA_03426	0.179856	0.0647482	0.316547	0.302158	0.136691
CCNA_03429	0.217251	0.167674	0.264006	0.114067	0.237001
CCNA_03428	0.275528	0.226469	0.171135	0.158015	0.168853
CCNA_03399	0.145455	0.172727	0.277273	0.209091	0.195455
CCNA_03398	0.147541	0.22541	0.229508	0.213115	0.184426
CCNA_00608	0.121212	0.166667	0.227273	0.257576	0.227273
CCNA_00609	0.16875	0.1875	0.21875	0.2125	0.2125
CCNA_00600	0.0727273	0.261818	0.247273	0.210909	0.207273
CCNA_00601	0.0826087	0.226087	0.213043	0.232609	0.245652
CCNA_00602	0.0857143	0.238095	0.247619	0.209524	0.219048
CCNA_00603	0.106952	0.224599	0.213904	0.219251	0.235294
CCNA_00604	0.0970874	0.213592	0.252427	0.223301	0.213592
CCNA_00605	0.10755	0.227208	0.190883	0.242165	0.232194
CCNA_02566	0.151515	0.160173	0.177489	0.277056	0.233766
CCNA_01733	0.166667	0.31746	0.15873	0.190476	0.166667
CCNA_01732	0.129213	0.264045	0.247191	0.179775	0.179775
CCNA_01731	0.197183	0.21831	0.253521	0.179577	0.151408
CCNA_01730	0.15625	0.263281	0.225781	0.169531	0.185156
CCNA_01737	0.243836	0.213699	0.10137	0.167123	0.273973
CCNA_02565	0.0727273	0.1	0.136364	0.481818	0.209091
CCNA_01735	0	0.333333	0	0.333333	0.333333
CCNA_01734	0.0631579	0.263158	0.226316	0.189474	0.257895
CCNA_R0196	0.126513	0.194036	0.223747	0.174049	0.281655
CCNA_R0197	0.0990991	0.247748	0.243243	0.198198	0.211712
CCNA_01739	0.219489	0.255203	0.172422	0.163671	0.189215
CCNA_01738	0.0220866	0.394653	0.277826	0.120023	0.185411
CCNA_R0192	0.214286	0.5	0	0.142857	0.142857
CCNA_R0193	0.171429	0.15	0.207143	0.221429	0.25
CCNA_R0190	0.278351	0.247423	0.175258	0.134021	0.164948
CCNA_R0191	0.198594	0.314587	0.202109	0.16696	0.11775
CCNA_02260	0.0894677	0.265572	0.240091	0.184032	0.220838
CCNA_02261	0.141046	0.229794	0.191759	0.210777	0.226624
CCNA_02262	0.111111	0.222222	0.222222	0.222222	0.222222
CCNA_02263	0.129032	0.258065	0.193548	0.16129	0.258065
CCNA_02264	0.241379	0.206897	0.189655	0.155172	0.206897
CCNA_02265	0.140351	0.204678	0.175439	0.22807	0.251462
CCNA_02266	0.157895	0.289474	0.184211	0.157895	0.210526
CCNA_02267	0.0909091	0.454545	0.181818	0.0909091	0.181818
CCNA_02268	0.1875	0.1875	0.25	0.25	0.125
CCNA_02269	0	0.416667	0.208333	0.208333	0.166667
CCNA_02062	0.129338	0.252366	0.26183	0.164038	0.192429
CCNA_02060	0.249448	0.15011	0.19426	0.181015	0.225166
CCNA_03646	0.136054	0.244898	0.258503	0.156463	0.204082
CCNA_02066	0.121495	0.261682	0.280374	0.158879	0.17757
CCNA_02067	0.0694888	0.263578	0.28754	0.202077	0.177316
CCNA_03643	0.177068	0.218797	0.198496	0.201504	0.204135
CCNA_02065	0.149321	0.226244	0.171946	0.199095	0.253394
CCNA_02068	0.191406	0.285156	0.179688	0.175781	0.167969
CCNA_02069	0.171363	0.217941	0.232892	0.184014	0.19379
CCNA_03649	0.131707	0.239024	0.214634	0.214634	0.2
CCNA_03648	0.0869565	0.173913	0.217391	0.228261	0.293478
yidC	0.216158	0.19596	0.220885	0.183928	0.183068
ctrA	0.010212	0.0923521	0.490065	0.260184	0.147186
CCNA_01939	0.285068	0.240724	0.202715	0.124887	0.146606
CCNA_00518	0.217903	0.219541	0.17888	0.189008	0.194668
CCNA_00519	0.152824	0.156146	0.27907	0.225914	0.186047
CCNA_02468	0.19685	0.251969	0.204724	0.181102	0.165354
CCNA_02469	0.137255	0.176471	0.215686	0.254902	0.215686
CCNA_00514	0.13986	0.160839	0.27972	0.216783	0.202797
CCNA_00515	0.0235445	0.369435	0.256635	0.173373	0.177012
CCNA_00516	0.125	0.275	0.25	0.175	0.175
CCNA_00517	0.128205	0.215385	0.307692	0.164103	0.184615
CCNA_00510	0.168889	0.213333	0.217778	0.208889	0.191111
CCNA_00511	0.167382	0.2103	0.201717	0.206009	0.214592
CCNA_00512	0.273666	0.19105	0.179002	0.16179	0.194492
CCNA_02461	0.161512	0.292096	0.226804	0.182131	0.137457
CCNA_02606	0.105263	0.175439	0.157895	0.315789	0.245614
CCNA_02607	0.194851	0.196333	0.192999	0.210965	0.204853
CCNA_02604	0.02267	0.105793	0.0894207	0.56927	0.212846
CCNA_02605	0.235772	0.211382	0.186992	0.170732	0.195122
ppk1	0.113636	0.142045	0.215909	0.315341	0.213068
CCNA_02603	0.00729927	0.0875912	0.0875912	0.554745	0.262774
CCNA_02600	0.5775	0.13375	0.07625	0.10125	0.11125
ppk2	0.0845588	0.202206	0.216912	0.216912	0.279412
CCNA_02608	0.041958	0.517483	0.20979	0.104895	0.125874
CCNA_02609	0	0.5	0.222222	0.111111	0.166667
CCNA_02743	0.655738	0.0327869	0.0532787	0.118852	0.139344
CCNA_02742	0.594059	0.0891089	0.0792079	0.108911	0.128713
CCNA_02840	0.037037	0.203704	0.185185	0.333333	0.240741
CCNA_02741	0.123416	0.286858	0.18479	0.222815	0.182121
CCNA_02841	0.066787	0.142599	0.238267	0.225632	0.326715
CCNA_01869	0.170213	0.191489	0.191489	0.212766	0.234043
CCNA_01868	0.214286	0.142857	0.214286	0.214286	0.214286
CCNA_03015	0.157609	0.228261	0.217391	0.201087	0.195652
CCNA_01863	0.104762	0.238095	0.247619	0.2	0.209524
CCNA_01862	0.106557	0.184426	0.27459	0.229508	0.204918
CCNA_01861	0.144295	0.191275	0.194631	0.244966	0.224832
CCNA_01860	0.1875	0.1875	0.25	0.125	0.25
CCNA_01865	0.129032	0.290323	0.225806	0.193548	0.16129
CCNA_01864	0.193784	0.166362	0.254113	0.199269	0.186472
CCNA_02745	0.132075	0.226415	0.188679	0.226415	0.226415
CCNA_02744	0.0526316	0.315789	0.263158	0.175439	0.192982
CCNA_00144	0.173077	0.269231	0.192308	0.173077	0.192308
pilA	0.540224	0.0359783	0.0102482	0.212247	0.201303
CCNA_03612	0.0304709	0.268698	0.362881	0.196676	0.141274
CCNA_02118	0.0947368	0.273684	0.273684	0.168421	0.189474
CCNA_02119	0.15493	0.323944	0.169014	0.183099	0.169014
CCNA_03016	0.0888889	0.288889	0.177778	0.155556	0.288889
CCNA_02218	0.176829	0.182927	0.22561	0.195122	0.219512
CCNA_02112	0.0704225	0.300469	0.248826	0.164319	0.215962
CCNA_02113	0.0833333	0.363095	0.208333	0.154762	0.190476
CCNA_02110	0.0535211	0.242254	0.225352	0.211268	0.267606
mmpA	0.129501	0.212887	0.256475	0.179406	0.221731
CCNA_02116	0.238095	0.166667	0.166667	0.238095	0.190476
CCNA_02117	0.219178	0.219178	0.164384	0.205479	0.191781
CCNA_02114	0.0151515	0.484848	0.0909091	0.136364	0.272727
CCNA_02115	0.0925926	0.166667	0.185185	0.240741	0.314815
CCNA_02288	0.104762	0.180952	0.161905	0.247619	0.304762
CCNA_03611	0.0218978	0.270073	0.350365	0.182482	0.175182
CCNA_02282	0.0992908	0.0851064	0.0425532	0.489362	0.283688
CCNA_02283	0.0403226	0.217742	0.233871	0.290323	0.217742
CCNA_02280	0.180822	0.271233	0.169863	0.191781	0.186301
CCNA_02281	0.107143	0.285714	0.241071	0.178571	0.1875
CCNA_02286	0.106608	0.156169	0.136035	0.25684	0.344347
CCNA_02287	0.0719603	0.215881	0.193548	0.260546	0.258065
CCNA_02284	0.184211	0.263158	0.105263	0.236842	0.210526
CCNA_01405	0.172776	0.171554	0.225073	0.235337	0.195259
CCNA_00825	0.0294118	0.441176	0.176471	0.176471	0.176471
CCNA_02703	0.0936639	0.168044	0.206612	0.247934	0.283747
CCNA_02680	0.0697674	0.20598	0.199336	0.255814	0.269103
relE-4	0.153846	0.22408	0.307692	0.140468	0.173913
relE-3	0.0909091	0.107438	0.289256	0.264463	0.247934
relE-1	0.173123	0.156174	0.267554	0.192494	0.210654
CCNA_03898	0.0930233	0.325581	0.209302	0.162791	0.209302
CCNA_03899	0.116761	0.231638	0.171375	0.205273	0.274953
CCNA_01007	0.39726	0.205479	0.0958904	0.0821918	0.219178
CCNA_01001	0.0445545	0.10396	0.435644	0.277228	0.138614
CCNA_01000	0.0181818	0.154545	0.390909	0.245455	0.190909
CCNA_02702	0.171429	0.2	0.114286	0.257143	0.257143
dnaE2	0.0714286	0.214286	0.285714	0.214286	0.214286
CCNA_03890	0.385593	0.271186	0.0423729	0.139831	0.161017
CCNA_03891	0	0.375	0.25	0.125	0.25
CCNA_03892	0.16875	0.265625	0.16875	0.1875	0.209375
CCNA_03893	0.104205	0.232176	0.162706	0.235832	0.265082
CCNA_01009	0.321429	0.107143	0.25	0.178571	0.142857
CCNA_01008	0.516129	0.0967742	0.16129	0.0967742	0.129032
CCNA_03896	0.686798	0.00421348	0.00421348	0.16573	0.139045
CCNA_03897	0.338462	0.15	0.184615	0.165385	0.161538
CCNA_03583	0.136585	0.446341	0.239024	0.0829268	0.095122
CCNA_03217	0.115942	0.15942	0.318841	0.246377	0.15942
CCNA_03581	0.15625	0.25	0.21875	0.1875	0.1875
ftsK	0.0136054	0.0136054	0.353741	0.455782	0.163265
CCNA_00284	0.289623	0.177358	0.200943	0.15	0.182075
CCNA_00285	0.259615	0.216346	0.195513	0.159455	0.169071
CCNA_00280	0.21875	0.227679	0.21875	0.151786	0.183036
ftsI	0.0863636	0.0863636	0.368182	0.309091	0.15
CCNA_00282	0.126761	0.34507	0.140845	0.147887	0.239437
CCNA_00283	0.207547	0.196226	0.224528	0.173585	0.198113
CCNA_03585	0.0960854	0.0747331	0.24911	0.3879	0.192171
CCNA_00288	0.0295316	0.40835	0.334012	0.0967413	0.131365
CCNA_00289	0.0268336	0.478533	0.294275	0.0903399	0.110018
CCNA_01139	0.200337	0.203704	0.186869	0.205387	0.203704
CCNA_01138	0.179245	0.216981	0.141509	0.216981	0.245283
CCNA_01133	0.12	0.166667	0.153333	0.246667	0.313333
CCNA_01135	0.243902	0.146341	0.146341	0.243902	0.219512
CCNA_01134	0.207921	0.19802	0.207921	0.188119	0.19802
CCNA_01137	0.0657895	0.263158	0.197368	0.171053	0.302632
CCNA_01136	0.1875	0.25	0.25	0.1875	0.125
fzeB	0.0651852	0.26963	0.237037	0.208889	0.219259
fzeA	0.127341	0.224719	0.197566	0.219101	0.231273
CCNA_02740	0.0983146	0.227528	0.171348	0.266854	0.235955
cydA	0.03125	0.0644231	0.0884615	0.546635	0.269231
cydB	0.0973872	0.0771971	0.0736342	0.609264	0.142518
cydC	0.0909091	0.113636	0.0681818	0.590909	0.136364
cydD	0.0382775	0.0861244	0.076555	0.516746	0.282297
staR	0.640166	0.144687	0.0403165	0.0704597	0.104371
CCNA_01808	0.20339	0.254237	0.169492	0.186441	0.186441
CCNA_01408	0.0521739	0.252174	0.173913	0.226087	0.295652
CCNA_00402	0.0645161	0.16129	0.290323	0.322581	0.16129
CCNA_00403	0.062963	0.211111	0.207407	0.248148	0.27037
CCNA_00400	0.0729167	0.166667	0.1875	0.260417	0.3125
CCNA_01255	0.094382	0.364045	0.208989	0.161798	0.170787
CCNA_00358	0.095679	0.182099	0.191358	0.243827	0.287037
CCNA_01257	0.0227273	0.386364	0.204545	0.181818	0.204545
CCNA_01250	0.0441176	0.352941	0.161765	0.205882	0.235294
CCNA_01251	0.0655738	0.360656	0.196721	0.163934	0.213115
CCNA_01252	0.148681	0.227818	0.182254	0.211031	0.230216
CCNA_01211	0.183594	0.195312	0.242188	0.175781	0.203125
CCNA_00352	0.207692	0.211189	0.232634	0.175058	0.173427
CCNA_00353	0.0874525	0.0228137	0.1673	0.463878	0.258555
CCNA_00350	0.00456621	0.0136986	0.255708	0.511416	0.214612
CCNA_00351	0.134146	0.243902	0.231707	0.207317	0.182927
CCNA_01258	0.0271493	0.343891	0.248869	0.153846	0.226244
CCNA_01259	0.0754779	0.183586	0.199736	0.261371	0.279829
CCNA_00354	0.0967466	0.202911	0.243151	0.253425	0.203767
CCNA_00355	0.203209	0.026738	0.15508	0.358289	0.256684
srp	0.257028	0.215529	0.195448	0.176707	0.155288
CCNA_01213	0.143519	0.217593	0.217593	0.194444	0.226852
CCNA_02693	0.566415	0.175478	0.0253221	0.0608618	0.171924
CCNA_02692	0.314488	0.236749	0.116608	0.141343	0.190813
CCNA_02886	0.119792	0.208333	0.130208	0.328125	0.213542
CCNA_01643	0.103093	0.189003	0.16323	0.285223	0.25945
CCNA_01217	0.105332	0.26788	0.230169	0.206762	0.189857
CCNA_03154	0.25	0.1	0.15	0.3	0.2
CCNA_00037	0.0564516	0.225806	0.201613	0.225806	0.290323
CCNA_00036	0.27256	0.235727	0.165746	0.152855	0.173112
CCNA_00035	0.189947	0.249273	0.20636	0.170969	0.18345
CCNA_00034	0.179204	0.20325	0.225805	0.190876	0.200865
CCNA_00033	0.228326	0.237591	0.173395	0.154203	0.206486
CCNA_00030	0.165563	0.231788	0.119205	0.231788	0.251656
CCNA_00039	0.104651	0.261628	0.290698	0.145349	0.197674
CCNA_00038	0.0927835	0.226804	0.268041	0.175258	0.237113
CCNA_02506	0.211382	0.178862	0.178862	0.211382	0.219512
hprK	0.075188	0.157895	0.338346	0.218045	0.210526
lon	0.119763	0.295993	0.203552	0.174863	0.205829
CCNA_02853	0.243902	0.195122	0.186992	0.195122	0.178862
CCNA_02852	0.0108108	0.0108108	0.383784	0.427027	0.167568
CCNA_02851	0.16	0.24	0.16	0.2	0.24
CCNA_02850	0.0689655	0.172414	0.206897	0.29064	0.261084
CCNA_02856	0.205128	0.205128	0.230769	0.179487	0.179487
CCNA_02855	0.177778	0.208333	0.216667	0.233333	0.163889
CCNA_02854	0.25	0.185484	0.181452	0.181452	0.201613
CCNA_01522	0.159544	0.196581	0.156695	0.222222	0.264957
CCNA_02859	0.186047	0.325581	0.209302	0.139535	0.139535
CCNA_02858	0.111111	0.152778	0.319444	0.222222	0.194444
CCNA_03252	0.037037	0.222222	0.296296	0.259259	0.185185
CCNA_03253	0.0657895	0.184211	0.302632	0.236842	0.210526
CCNA_03250	0.111111	0.0740741	0.166667	0.425926	0.222222
CCNA_02501	0.0617284	0.185185	0.185185	0.345679	0.222222
CCNA_03256	0.246649	0.214477	0.198391	0.171582	0.168901
CCNA_03257	0.207057	0.185701	0.220984	0.174559	0.211699
CCNA_03254	0.0833333	0.208333	0.291667	0.208333	0.208333
CCNA_03707	0.173077	0.153846	0.211538	0.211538	0.25
pulE	0.296296	0.185185	0.185185	0.148148	0.185185
pulD	0.243243	0.216216	0.216216	0.162162	0.162162
CCNA_03258	0.0561798	0.0617978	0.303371	0.337079	0.241573
CCNA_03259	0.217021	0.182979	0.268085	0.191489	0.140426
nrtA	0.0597015	0.701493	0.119403	0.0447761	0.0746269
CCNA_00729	0.110619	0.0176991	0.190265	0.420354	0.261062
CCNA_00728	0.0943396	0.0440252	0.157233	0.465409	0.238994
nrtD	0.0735294	0.691176	0.0735294	0.0882353	0.0735294
CCNA_00723	0.183908	0.229885	0.235632	0.195402	0.155172
CCNA_00722	0.169514	0.0548561	0.20009	0.320594	0.254946
CCNA_00721	0.158486	0.0454628	0.21065	0.317515	0.267886
CCNA_00720	0.0769231	0.143813	0.329431	0.235786	0.214047
CCNA_00727	0.227679	0.1875	0.200893	0.191964	0.191964
CCNA_00726	0.115646	0.108844	0.131519	0.303855	0.340136
CCNA_00725	0.166667	0.166667	0.166667	0.166667	0.333333
CCNA_00724	0.14557	0.265823	0.21519	0.183544	0.189873
CCNA_02500	0.0659341	0.137363	0.153846	0.384615	0.258242
CCNA_00088	0.118467	0.222997	0.205575	0.222997	0.229965
CCNA_03805	0.1133	0.137931	0.206897	0.167488	0.374384
pdeA	0.137615	0.0366972	0.197248	0.385321	0.243119
CCNA_03802	0.197309	0.242152	0.224215	0.170404	0.165919
CCNA_02541	0.09375	0.25	0.15625	0.25	0.25
CCNA_02540	0.0380875	0.298217	0.23825	0.212318	0.213128
CCNA_03115	0.179104	0.208955	0.205224	0.19403	0.212687
CCNA_02594	0.139241	0.183544	0.221519	0.240506	0.21519
CCNA_03414	0.0486618	0.237632	0.261152	0.214923	0.237632
CCNA_03415	0.217685	0.194602	0.198864	0.232244	0.156605
CCNA_03416	0.138889	0.240741	0.212963	0.175926	0.231481
CCNA_03417	0.103448	0.172414	0.206897	0.206897	0.310345
CCNA_03410	0.0864198	0.0432099	0.166667	0.481481	0.222222
CCNA_03412	0.0375209	0.218425	0.282412	0.191625	0.270017
CCNA_03413	0.0253998	0.206491	0.275635	0.215428	0.277046
CCNA_02013	0.0806643	0.217082	0.282325	0.190985	0.228944
CCNA_03104	0.199248	0.221805	0.221805	0.172932	0.184211
CCNA_03418	0.0648148	0.185185	0.166667	0.296296	0.287037
CCNA_03419	0.111111	0.222222	0.166667	0.222222	0.277778
CCNA_02012	0.127119	0.226392	0.245763	0.173123	0.227603
CCNA_02011	0.0832538	0.159559	0.157651	0.310124	0.289413
CCNA_00619	0	1	0	0	0
CCNA_00618	0	0.5	0	0	0.5
CCNA_00617	0	0	0.5	0	0.5
chvG	0.0864198	0.209877	0.314815	0.175926	0.212963
CCNA_00615	0.12	0.32	0.24	0.16	0.16
CCNA_00614	0.111111	0.25	0.25	0.166667	0.222222
CCNA_00613	0.15	0.25	0.25	0.2	0.15
CCNA_00612	0.166667	0.291667	0.166667	0.208333	0.166667
CCNA_00611	0.234542	0.200426	0.217484	0.179104	0.168443
CCNA_00610	0.171296	0.171296	0.226852	0.226852	0.203704
CCNA_03090	0.178667	0.224	0.206667	0.181333	0.209333
CCNA_03091	0.219931	0.250859	0.158076	0.178694	0.19244
CCNA_01744	0.159091	0.272727	0.181818	0.204545	0.181818
CCNA_01745	0.117647	0.233397	0.210626	0.210626	0.227704
CCNA_01742	0.175292	0.232053	0.196995	0.198664	0.196995
CCNA_03809	0.125	0.177885	0.302885	0.170673	0.223558
CCNA_01740	0.162191	0.333691	0.183315	0.148944	0.171858
CCNA_03011	0.134146	0.182927	0.219512	0.256098	0.207317
CCNA_R0185	0.150502	0.190635	0.270903	0.180602	0.207358
CCNA_R0184	0.149612	0.517829	0.193798	0.0728682	0.0658915
CCNA_R0186	0.0574324	0.25	0.275901	0.210586	0.206081
CCNA_R0181	0.378378	0.243243	0.135135	0.162162	0.0810811
CCNA_R0180	0.0762712	0.194915	0.0847458	0.194915	0.449153
CCNA_01748	0.122951	0.26776	0.234973	0.187158	0.187158
CCNA_01749	0.17977	0.215217	0.257901	0.153972	0.19314
CCNA_02277	0.0045045	0.355856	0.0405405	0.342342	0.256757
CCNA_03679	0.104265	0.227488	0.303318	0.156398	0.208531
CCNA_02275	0	0.296703	0.0549451	0.384615	0.263736
CCNA_02274	0	0.365269	0.0568862	0.317365	0.260479
CCNA_02273	0.215604	0.258389	0.187919	0.181208	0.156879
CCNA_02272	0.151899	0.308861	0.2	0.16962	0.16962
CCNA_02270	0.0827068	0.319549	0.206767	0.172932	0.218045
CCNA_03670	0.111111	0.2	0.222222	0.2	0.266667
CCNA_03014	0.162162	0.199324	0.209459	0.221284	0.20777
CCNA_03672	0.260559	0.200913	0.185502	0.162386	0.190639
CCNA_03673	0.160606	0.251515	0.178788	0.166667	0.242424
CCNA_03674	0.139867	0.24548	0.164605	0.186489	0.263559
CCNA_03675	0.0722022	0.238267	0.234657	0.202166	0.252708
CCNA_02279	0.206266	0.287206	0.172324	0.16188	0.172324
CCNA_02278	0.202703	0.251351	0.156757	0.213514	0.175676
CCNA_02071	0.200285	0.196581	0.208832	0.197151	0.197151
CCNA_02070	0.172784	0.186213	0.206804	0.207699	0.2265
CCNA_02073	0.142857	0.285714	0.142857	0.214286	0.214286
CCNA_02072	0.219512	0.280488	0.170732	0.146341	0.182927
CCNA_02074	0.217391	0.217391	0.173913	0.217391	0.173913
CCNA_02077	0.104854	0.300971	0.260194	0.159223	0.174757
CCNA_02076	0.130501	0.280728	0.264036	0.159332	0.165402
CCNA_03072	0.122449	0.166667	0.268707	0.214286	0.227891
CCNA_03073	0	0	0.4	0.4	0.2
hdaA	0.204918	0.278689	0.139344	0.163934	0.213115
lysS	0.241333	0.224	0.2	0.16	0.174667
CCNA_03076	0.130208	0.166667	0.25	0.229167	0.223958
CCNA_03077	0.145161	0.193548	0.193548	0.225806	0.241935
CCNA_03075	0	0	0	0.5	0.5
CCNA_03421	0.152381	0.219048	0.209524	0.209524	0.209524
CCNA_03116	0.117647	0.25	0.235294	0.161765	0.235294
phyR	0.092233	0.337864	0.180583	0.135922	0.253398
CCNA_03392	0.189781	0.248175	0.211679	0.19708	0.153285
CCNA_03423	0.133333	0.2	0.311111	0.2	0.155556
CCNA_00503	0.0466667	0.331429	0.318095	0.15619	0.147619
CCNA_00502	0.241636	0.230483	0.189591	0.174721	0.163569
CCNA_00501	0.163399	0.215686	0.235294	0.183007	0.202614
CCNA_03390	0.0824468	0.194149	0.292553	0.140957	0.289894
CCNA_02479	0.228571	0.142857	0.171429	0.228571	0.228571
CCNA_02478	0.173913	0.173913	0.217391	0.173913	0.26087
CCNA_00505	0.155227	0.207858	0.238055	0.200703	0.198157
CCNA_00504	0.158249	0.185185	0.208754	0.228956	0.218855
CCNA_03397	0.148833	0.131323	0.234922	0.253891	0.231031
CCNA_00509	0.155172	0.206897	0.189655	0.206897	0.241379
CCNA_00508	0.078125	0.21875	0.203125	0.21875	0.28125
CCNA_02471	0.433333	0.466667	0.0666667	0.0333333	0
CCNA_02470	0.166667	0.25	0.166667	0.166667	0.25
CCNA_02473	0.330709	0.417323	0.141732	0.0629921	0.0472441
CCNA_02472	0.417391	0.373913	0.130435	0.0521739	0.026087
CCNA_01922	0.25	0.2	0.125	0.2	0.225
CCNA_01923	0.226483	0.165702	0.237337	0.156295	0.214182
CCNA_01921	0.315385	0.15	0.180769	0.165385	0.188462
CCNA_01927	0.0983607	0.229508	0.180328	0.229508	0.262295
CCNA_01924	0.160714	0.232143	0.214286	0.196429	0.196429
CCNA_01925	0.0697674	0.249169	0.17608	0.232558	0.272425
CCNA_01928	0.202381	0.244048	0.184524	0.136905	0.232143
CCNA_01929	0.185388	0.218265	0.183562	0.190868	0.221918
CCNA_02615	0.0769231	0.186813	0.186813	0.263736	0.285714
CCNA_02614	0.097973	0.209459	0.14527	0.266892	0.280405
CCNA_02617	0.181818	0.272727	0.181818	0.181818	0.181818
CCNA_02616	0.238095	0.161905	0.2	0.219048	0.180952
CCNA_02611	0.196078	0.176471	0.235294	0.176471	0.215686
CCNA_02610	0.0243902	0.292683	0.268293	0.195122	0.219512
CCNA_02613	0.105263	0.263158	0.131579	0.210526	0.289474
CCNA_02612	0.190283	0.259109	0.178138	0.186235	0.186235
CCNA_01978	0.0806452	0.258065	0.294355	0.157258	0.209677
CCNA_02619	0.136729	0.243968	0.217158	0.211796	0.190349
CCNA_02618	0.109589	0.178082	0.315068	0.232877	0.164384
rpsS	0.237326	0.192449	0.171079	0.19518	0.203965
CCNA_R0109	0.173333	0.213333	0.24	0.213333	0.16
bapE	0	0.2	0.36	0.28	0.16
CCNA_R0108	0.105263	0.284689	0.232057	0.227273	0.150718
CCNA_01818	0.17801	0.176265	0.207679	0.207679	0.230366
CCNA_01819	0.235853	0.158488	0.155836	0.198276	0.251547
CCNA_01816	0.205279	0.16129	0.225806	0.214076	0.193548
CCNA_01817	0.183274	0.192171	0.208185	0.201068	0.215302
CCNA_01814	0.39951	0.213235	0.125	0.122549	0.139706
CCNA_01815	0.399441	0.284916	0.100559	0.100559	0.114525
CCNA_01812	0.27907	0.255814	0.145349	0.151163	0.168605
CCNA_01813	0.395303	0.221135	0.152642	0.131115	0.0998043
CCNA_01810	0.207317	0.204268	0.164634	0.195122	0.228659
CCNA_01811	0.251366	0.256831	0.180328	0.125683	0.185792
CCNA_00688	0.0810811	0.22973	0.297297	0.189189	0.202703
CCNA_02108	0.0915254	0.264407	0.240678	0.169492	0.233898
CCNA_02101	0.102326	0.223256	0.283721	0.176744	0.213953
CCNA_02100	0.0829146	0.261307	0.258794	0.178392	0.218593
atpA	0.250862	0.209703	0.206484	0.170844	0.162106
CCNA_02102	0.101064	0.239362	0.196809	0.218085	0.244681
CCNA_02105	0.133612	0.026096	0.150313	0.438413	0.251566
CCNA_02104	0.116071	0.0178571	0.205357	0.401786	0.258929
CCNA_02106	0.194245	0.223022	0.230216	0.172662	0.179856
CCNA_02298	0.0446927	0.273743	0.27933	0.201117	0.201117
hemH	0.195046	0.281734	0.160991	0.164087	0.198142
hemN	0.00911458	0.0833333	0.0572917	0.63151	0.21875
CCNA_02291	0.114286	0.171429	0.228571	0.285714	0.2
CCNA_02290	0.048	0.324	0.268	0.196	0.164
CCNA_02293	0.105956	0.312142	0.215349	0.159794	0.206758
CCNA_02292	0.153846	0.288462	0.192308	0.192308	0.173077
CCNA_02295	0.109705	0.240506	0.14346	0.236287	0.270042
CCNA_02294	0.181416	0.276549	0.176991	0.165929	0.199115
[truncated: 2,071 more rows]
