# Supplementary material for: Gene network analysis identifies a central post-transcriptional regulator of cellular stress survival
Source: eLife journal article supplement (doi:10.7554/elife.33684), 2018-03-14
Supplement: supp [file elife-33684-supp-v1.zip › elife_poa_e33684_Figure_1_source_data_2.xlsx]

## Sheet: Iterative Rank Results
Parameters for Iterative Rank
alpha value	0.5
initial weighted genes	phyR, sigU, phyK, nepR, sigT, lovR, lovK
Edge Reduction cut off	0.9
Rank	KeyName	Value
1	phyR	0.508186
2	sigU	0.507456
3	phyK	0.507055
4	nepR	0.506732
5	sigT	0.506542
6	lovR	0.503248
7	lovK	0.502874
8	CCNA_R0081	0.00861266
9	CCNA_00586	0.00816866
10	CCNA_03422	0.00807429
11	CCNA_02440	0.00804186
12	CCNA_03821	0.00800905
13	CCNA_03669	0.00798198
14	CCNA_03747	0.00791898
15	CCNA_01826	0.0078699
16	CCNA_00565	0.00779174
17	glyQ	0.00774095
18	rsmB	0.00774002
19	CCNA_02460	0.00760184
20	CCNA_01275	0.00750132
21	CCNA_00554	0.00747951
22	CCNA_03484	0.00745502
23	CCNA_00568	0.00743686
24	CCNA_02170	0.00733153
25	CCNA_02197	0.00725753
26	CCNA_01517	0.00723809
27	CCNA_02266	0.00723158
28	CCNA_00104	0.00722332
29	CCNA_00135	0.00717074
30	CCNA_00534	0.00713635
31	CCNA_01110	0.00711922
32	CCNA_00002	0.00710925
33	CCNA_00743	0.00708514
34	CCNA_03692	0.00703437
35	CCNA_01251	0.00698788
36	CCNA_00524	0.0069725
37	pbpY	0.00693712
38	CCNA_03724	0.00692546
39	creS	0.00690621
40	CCNA_01196	0.00686371
41	CCNA_01972	0.00685035
42	lon	0.0068328
43	CCNA_02650	0.00683179
44	CCNA_02416	0.00682988
45	CCNA_00083	0.00682436
46	mviN	0.00682238
47	mipZ	0.00680288
48	CCNA_00282	0.00678927
49	CCNA_03748	0.00675065
50	CCNA_02201	0.00674886
51	CCNA_03664	0.00674372
52	CCNA_03333	0.0067332
53	CCNA_02122	0.00670839
54	CCNA_00750	0.00670408
55	CCNA_03898	0.00666732
56	CCNA_02776	0.00666485
57	CCNA_00535	0.00665294
58	CCNA_01056	0.00665232
59	CCNA_00499	0.00663631
60	tipF	0.00663465
61	CCNA_02113	0.00660826
62	CCNA_02293	0.00660054
63	CCNA_02388	0.00654531
64	CCNA_02549	0.0065334
65	CCNA_03127	0.00652384
66	CCNA_02114	0.00652302
67	CCNA_02609	0.00652199
68	CCNA_01974	0.00650514
69	CCNA_03504	0.00650449
70	CCNA_R0046	0.00649985
71	adk	0.00649768
72	CCNA_R0045	0.00649554
73	CCNA_02311	0.00648462
74	CCNA_R0150	0.00647763
75	CCNA_02198	0.00644786
76	CCNA_03861	0.00643424
77	CCNA_00871	0.0064244
78	CCNA_02900	0.00642172
79	CCNA_01723	0.00642112
80	CCNA_01975	0.006412
81	CCNA_03048	0.00640621
82	CCNA_03730	0.00639915
83	CCNA_00001	0.00639439
84	CCNA_02363	0.00639005
85	CCNA_02270	0.00636153
86	CCNA_03784	0.00636047
87	CCNA_02267	0.00634159
88	CCNA_00152	0.00632538
89	CCNA_02629	0.00630443
90	CCNA_R0096	0.00630249
91	fzlC	0.00630003
92	CCNA_00961	0.00626499
93	popA	0.00624953
94	CCNA_02126	0.00624766
95	CCNA_00959	0.00624697
96	CCNA_00069	0.00624327
97	CCNA_02320	0.00624084
98	cobQ	0.0062271
99	CCNA_01257	0.0062179
100	CCNA_00694	0.00621555
101	CCNA_00390	0.00619763
102	CCNA_03449	0.00616664
103	CCNA_01945	0.00616537
104	CCNA_01607	0.0061631
105	CCNA_00366	0.0061592
106	CCNA_00391	0.0061262
107	CCNA_01947	0.00609835
108	CCNA_00825	0.00609541
109	parE-3	0.0060893
110	CCNA_02447	0.00606826
111	CCNA_03090	0.0060645
112	CCNA_01537	0.00603545
113	CCNA_01675	0.00602311
114	CCNA_01572	0.00601288
115	CCNA_01888	0.00600336
116	CCNA_03742	0.00599805
117	CCNA_03860	0.00598913
118	CCNA_01190	0.00597054
119	CCNA_02390	0.00596378
120	CCNA_02628	0.00588587
121	CCNA_03609	0.00580971
122	moaD	0.00580713
123	CCNA_03814	0.00578728
124	CCNA_03497	0.00577786
125	rsaFb	0.00575415
126	CCNA_00389	0.00575222
127	CCNA_00044	0.00574856
128	CCNA_01757	0.00572359
129	CCNA_00901	0.00572203
130	qor	0.00570264
131	CCNA_02226	0.00567899
132	ihfA	0.00566873
133	CCNA_03718	0.00565223
134	CCNA_03956	0.00558342
135	dnaX	0.00553737
136	rpsH	0.00553731
137	CCNA_R0128	0.00552648
138	CCNA_01249	0.00550441
139	CCNA_02537	0.00550171
140	CCNA_03596	0.00549583
141	CCNA_03892	0.00549573
142	CCNA_03481	0.0054909
143	CCNA_02906	0.0054895
144	CCNA_01223	0.00547346
145	CCNA_02389	0.00545773
146	CCNA_01250	0.00537754
147	chrR	0.00535552
148	CCNA_03329	0.00534035
149	CCNA_03740	0.00532132
150	CCNA_00144	0.00532127
151	glyS	0.00531408
152	CCNA_01750	0.00530863
153	CCNA_02401	0.00530282
154	CCNA_03877	0.00529174
155	CCNA_03437	0.00528713
156	CCNA_01742	0.00528541
157	CCNA_00732	0.00527074
158	CCNA_00500	0.00526486
159	CCNA_02152	0.00525812
160	CCNA_03655	0.00525658
161	CCNA_03330	0.00524328
162	CCNA_01966	0.00524328
163	dgcA	0.00523936
164	CCNA_03653	0.00523665
165	CCNA_02917	0.00523261
166	CCNA_01362	0.00523234
167	recR	0.00522719
168	podJ	0.00522444
169	CCNA_01143	0.00522295
170	CCNA_02289	0.00522054
171	CCNA_03315	0.00519902
172	CCNA_03801	0.00519348
173	CCNA_00267	0.00518938
174	CCNA_03373	0.00518172
175	CCNA_R0129	0.00515813
176	CCNA_01752	0.00514837
177	CCNA_02736	0.00514332
178	CCNA_02394	0.00514233
179	CCNA_01079	0.00513399
180	CCNA_R0051	0.00512863
181	CCNA_01385	0.00511649
182	CCNA_02089	0.0051121
183	CCNA_02678	0.00510361
184	parD-3	0.00509877
185	CCNA_00100	0.00509286
186	rusA	0.00509064
187	stpB	0.00508583
188	CCNA_02559	0.00507482
189	CCNA_00225	0.00505877
190	CCNA_03789	0.00504558
191	CCNA_01255	0.00504546
192	CCNA_01593	0.00503768
193	CCNA_02050	0.00502975
194	CCNA_00925	0.00502473
195	CCNA_03852	0.00502093
196	CCNA_01582	0.00501947
197	CCNA_03891	0.00501947
198	CCNA_03325	0.00501485
199	CCNA_01535	0.00500543
200	CCNA_00103	0.00498665
201	CCNA_03331	0.00498552
202	CCNA_02382	0.00498495
203	CCNA_02051	0.00497736
204	CCNA_00724	0.00497109
205	CCNA_02731	0.00492912
206	CCNA_01776	0.00490891
207	CCNA_00410	0.00490792
208	CCNA_00085	0.00490285
209	CCNA_00738	0.00489723
210	gpsA	0.00489581
211	CCNA_03812	0.00489
212	CCNA_00179	0.00489
213	CCNA_00004	0.00488727
214	CCNA_02272	0.00488182
215	xylD	0.00486889
216	CCNA_01669	0.00486677
217	gltD	0.00484168
218	CCNA_02189	0.00483974
219	stpX	0.00483138
220	CCNA_02649	0.00481682
221	CCNA_01144	0.0048059
222	CCNA_03739	0.00479682
223	CCNA_03758	0.00479405
224	CCNA_02381	0.00478913
225	CCNA_02608	0.00478776
226	CCNA_00915	0.00477271
227	nuoA	0.00477003
228	CCNA_03621	0.00475778
229	shpA	0.00475778
230	CCNA_01740	0.00475376
231	gcrA	0.00473651
232	CCNA_03628	0.00472631
233	CCNA_00141	0.00470536
234	CCNA_00261	0.00468417
235	CCNA_00909	0.00467681
236	CCNA_R0153	0.00466453
237	CCNA_03846	0.00466378
238	CCNA_03760	0.00464782
239	CCNA_01105	0.00462901
240	CCNA_01575	0.0046261
241	CCNA_03817	0.00461937
242	CCNA_00934	0.00461615
243	CCNA_03699	0.00461026
244	CCNA_02294	0.00459014
245	CCNA_01258	0.00456959
246	CCNA_03024	0.00456526
247	CCNA_01624	0.0045526
248	CCNA_01738	0.00452014
249	CCNA_01178	0.00447548
250	CCNA_00073	0.0044747
251	mutL	0.00447347
252	CCNA_02656	0.00445227
253	CCNA_02995	0.00444761
254	CCNA_01981	0.00444761
255	CCNA_00988	0.00444561
256	CCNA_01963	0.00444311
257	CCNA_01432	0.00443357
258	CCNA_00673	0.004433
259	CCNA_00392	0.00441546
260	CCNA_01894	0.00441546
261	CCNA_02845	0.00435672
262	CCNA_02225	0.00435477
263	CCNA_00924	0.00433614
264	CCNA_01611	0.00433501
265	CCNA_02451	0.00432776
266	CCNA_01070	0.00432214
267	CCNA_03828	0.00430887
268	CCNA_03688	0.00429639
269	CCNA_03673	0.00426743
270	CCNA_03741	0.0042328
271	CCNA_00912	0.00411067
272	cysH	0.0041104
273	mutS	0.00409286
274	CCNA_00561	0.00409065
275	CCNA_02406	0.00408108
276	CCNA_00681	0.00407209
277	CCNA_00367	0.00406548
278	CCNA_01900	0.00406384
279	CCNA_02523	0.00403509
280	CCNA_03725	0.00401297
281	CCNA_00269	0.00397984
282	CCNA_01828	0.00396592
283	CCNA_03522	0.0039514
284	CCNA_03501	0.00393557
285	CCNA_01626	0.00392308
286	CCNA_01751	0.0039228
287	CCNA_03884	0.00388275
288	rsaA	0.00386718
289	CCNA_00109	0.0038666
290	CCNA_02444	0.00385913
291	CCNA_R0050	0.00383929
292	nuoN	0.0038123
293	CCNA_00184	0.00377444
294	CCNA_00693	0.00376024
295	CCNA_03499	0.00374183
296	CCNA_02622	0.00373122
297	CCNA_02454	0.00372753
298	CCNA_00870	0.00372753
299	ligA	0.00371338
300	CCNA_01149	0.00370432
301	CCNA_00024	0.00369796
302	CCNA_01976	0.00369058
303	CCNA_01744	0.00369012
304	CCNA_02292	0.0036739
305	CCNA_03273	0.00367368
306	CCNA_02269	0.00365789
307	CCNA_R0148	0.00365081
308	CCNA_01764	0.00361296
309	CCNA_01212	0.00360358
310	CCNA_02842	0.00360211
311	tfoX	0.003588
312	CCNA_03143	0.00356875
313	ubiB	0.00356432
314	CCNA_03750	0.00355783
315	CCNA_01392	0.00353802
316	CCNA_01630	0.00353529
317	CCNA_03416	0.00352459
318	CCNA_01930	0.00347834
319	CCNA_02304	0.00346758
320	CCNA_02119	0.00346251
321	CCNA_03500	0.00346055
322	CCNA_R0136	0.00344443
323	CCNA_03106	0.00342591
324	CCNA_R0041	0.00341046
325	CCNA_02043	0.0033922
326	thiC	0.0033818
327	CCNA_00105	0.00337685
328	CCNA_00324	0.00335959
329	stpA	0.00335796
330	rplR	0.00334751
331	CCNA_03016	0.0033446
332	CCNA_02188	0.00334365
333	iolB	0.00333497
334	CCNA_02263	0.00333036
335	stpC	0.00329802
336	CCNA_03749	0.00329058
337	CCNA_02330	0.00329024
338	fabI	0.00329021
339	CCNA_01276	0.00328628
340	CCNA_01646	0.00328577
341	CCNA_03187	0.00326677
342	CCNA_03059	0.00323349
343	CCNA_02307	0.00321282
344	CCNA_01081	0.00320817
345	CCNA_01549	0.00320427
346	CCNA_03957	0.00318868
347	CCNA_00615	0.00318566
348	CCNA_01670	0.0031825
349	CCNA_00826	0.00314548
350	CCNA_01733	0.00309427
351	trpS	0.00306925
352	nrtA	0.00305206
353	CCNA_00277	0.00304398
354	CCNA_02545	0.00303388
355	CCNA_00529	0.00302397
356	CCNA_01602	0.00298845
357	CCNA_03968	0.00297844
358	CCNA_R0151	0.00294262
359	CCNA_R0123	0.00293751
360	CCNA_00515	0.00291327
361	CCNA_R0070	0.00289956
362	CCNA_03362	0.0028961
363	ftsZ	0.00289168
364	CCNA_02721	0.00288989
365	CCNA_02914	0.00288615
366	CCNA_03393	0.00288409
367	CCNA_01334	0.00288291
368	CCNA_03626	0.00287635
369	CCNA_02130	0.00287213
370	nuoJ	0.00285596
371	nrtD	0.00284398
372	CCNA_03881	0.00284307
373	CCNA_01027	0.00284307
374	CCNA_03276	0.00284307
375	CCNA_02617	0.00284307
376	CCNA_02869	0.00284307
377	CCNA_00619	0.00284307
378	CCNA_01048	0.00284307
379	CCNA_R0157	0.00284307
380	CCNA_01029	0.00284307
381	CCNA_02206	0.00283833
382	parE-4	0.00283657
383	CCNA_R0194	0.00283288
384	CCNA_01335	0.00282699
385	CCNA_02236	0.00280783
386	CCNA_01884	0.00280783
387	CCNA_00958	0.00280783
388	CCNA_02445	0.00280137
389	CCNA_01493	0.00279624
390	CCNA_02112	0.00278774
391	nrtB	0.00278265
392	CCNA_01508	0.00276464
393	CCNA_03438	0.00276147
394	CCNA_00189	0.00273936
395	CCNA_01746	0.00273787
396	CCNA_00644	0.00273128
397	CCNA_01145	0.00272756
398	CCNA_02280	0.00272518
399	recA	0.00271384
400	CCNA_03174	0.0027002
401	CCNA_03866	0.00267368
402	trmE	0.00266198
403	CCNA_03577	0.0026618
404	CCNA_02878	0.00265685
405	CCNA_00114	0.00263243
406	CCNA_02964	0.00263179
407	CCNA_02737	0.0026166
408	nuoH	0.0026152
409	CCNA_00113	0.00261278
410	CCNA_00262	0.00259338
411	CCNA_02354	0.00256923
412	CCNA_R0063	0.00255936
413	CCNA_02209	0.00253836
414	lolD	0.00253248
415	cysI	0.00253164
416	hetN	0.00252329
417	CCNA_03314	0.0025113
418	CCNA_03581	0.00250419
419	CCNA_02593	0.00249074
420	CCNA_00311	0.00247878
421	CCNA_02327	0.00246101
422	CCNA_01730	0.00245913
423	CCNA_01162	0.00245824
424	CCNA_02387	0.00245592
425	CCNA_00156	0.00245443
426	CCNA_03971	0.00243347
427	CCNA_03816	0.00242746
428	CCNA_01687	0.00242018
429	CCNA_01161	0.00239291
430	CCNA_R0133	0.00239262
431	CCNA_01378	0.00238589
432	CCNA_00146	0.00236287
433	CCNA_00185	0.00236239
434	CCNA_R0042	0.00234821
435	CCNA_02492	0.00234506
436	CCNA_03665	0.00232447
437	CCNA_01224	0.00231296
438	CCNA_00414	0.00231241
439	CCNA_00709	0.00231072
440	CCNA_01807	0.00231068
441	CCNA_01654	0.0023104
442	nuoC	0.002304
443	CCNA_03587	0.00229743
444	CCNA_R0166	0.00229642
445	CCNA_03643	0.00229302
446	CCNA_02296	0.00228848
447	CCNA_01617	0.00228606
448	CCNA_03457	0.00227465
449	CCNA_00569	0.00226166
450	CCNA_00612	0.00225909
451	CCNA_02462	0.0022358
452	CCNA_03627	0.00223079
453	CCNA_01506	0.00222715
454	CCNA_01125	0.00222677
455	CCNA_01550	0.00221327
456	CCNA_02530	0.00221013
457	CCNA_03505	0.00219995
458	CCNA_00020	0.00219271
459	CCNA_01175	0.00219201
460	CCNA_02669	0.00219191
461	CCNA_03851	0.00218847
462	CCNA_00187	0.00218781
463	CCNA_00527	0.00218429
464	CCNA_00254	0.0021832
465	CCNA_02281	0.00217981
466	CCNA_02297	0.00217465
467	CCNA_02747	0.00217211
468	CCNA_00357	0.00217051
469	recG	0.00216999
470	CCNA_01763	0.00216705
471	CCNA_01668	0.0021628
472	CCNA_00289	0.00214879
473	CCNA_02448	0.00214804
474	CCNA_00096	0.00214487
475	CCNA_03963	0.00214255
476	kdpE	0.00213194
477	CCNA_00886	0.0021257
478	CCNA_01915	0.00212445
479	CCNA_01397	0.00211697
480	CCNA_03732	0.00211641
481	CCNA_00205	0.00210669
482	CCNA_03916	0.00209483
483	CCNA_01521	0.00208979
484	CCNA_02208	0.0020896
485	scpB	0.0020852
486	CCNA_01560	0.00208456
487	pulO	0.00208256
488	CCNA_02587	0.0020671
489	CCNA_02092	0.00206397
490	CCNA_01778	0.00205934
491	CCNA_01924	0.00205666
492	CCNA_00407	0.00205261
493	CCNA_03116	0.00204955
494	CCNA_01748	0.00204919
495	CCNA_01108	0.00204131
496	CCNA_00869	0.00203253
497	CCNA_01420	0.00202892
498	CCNA_02710	0.00202889
499	CCNA_02744	0.00201834
500	CCNA_01445	0.00201833
501	CCNA_02163	0.00201596
502	CCNA_02450	0.00200435
503	CCNA_00974	0.00200274
504	CCNA_00097	0.0020013
505	CCNA_02223	0.00199588
506	CCNA_03493	0.00199253
507	CCNA_01502	0.00198752
508	CCNA_01447	0.00198665
509	CCNA_01416	0.00198608
510	CCNA_03745	0.00198292
511	parD-2	0.00198265
512	CCNA_02340	0.00198059
513	CCNA_02193	0.00198052
514	CCNA_03578	0.00197596
515	CCNA_01055	0.00197482
516	CCNA_01665	0.00197411
517	CCNA_00453	0.00196202
518	popZ	0.00196086
519	CCNA_00452	0.00196013
520	CCNA_02108	0.00195535
521	gmk	0.00195027
522	CCNA_02211	0.00194998
523	CCNA_03582	0.00194679
524	CCNA_R0161	0.00194441
525	CCNA_03955	0.00194172
526	CCNA_03779	0.00193969
527	ftsN	0.00193902
528	CCNA_03434	0.00193608
529	CCNA_03432	0.00193146
530	CCNA_00872	0.00192392
531	CCNA_01103	0.00192048
532	CCNA_03967	0.0019132
533	nuoF	0.00190994
534	CCNA_01688	0.00190451
535	nuoM	0.00190123
536	acnA	0.00190058
537	CCNA_03510	0.00190026
538	CCNA_03543	0.00189955
539	CCNA_00115	0.00189377
540	CCNA_01372	0.00189261
541	CCNA_01217	0.00189151
542	CCNA_02005	0.00188971
543	ubiE	0.00188427
544	CCNA_01973	0.00188118
545	murD	0.00187922
546	CCNA_00775	0.00187912
547	CCNA_00497	0.00187248
548	CCNA_02588	0.00186461
549	CCNA_02035	0.00186415
550	CCNA_02156	0.00186413
551	CCNA_03347	0.00186212
552	nasC	0.00186174
553	CCNA_01906	0.00186174
554	cenK	0.0018609
555	CCNA_00654	0.00186062
556	CCNA_00887	0.00185921
557	CCNA_02306	0.0018578
558	CCNA_03547	0.00185171
559	CCNA_03865	0.00185042
560	CCNA_00107	0.00184961
561	CCNA_01919	0.00184922
562	CCNA_02260	0.00184425
563	CCNA_02091	0.00184292
564	CCNA_02329	0.00184129
565	CCNA_00408	0.00183706
566	glpK	0.0018308
567	mreB	0.00182415
568	CCNA_02612	0.00182194
569	CCNA_01762	0.00181686
570	CCNA_01479	0.00181048
571	CCNA_01109	0.00181042
572	CCNA_03544	0.00181039
573	nirB	0.00180456
574	CCNA_00046	0.00179907
575	CCNA_01841	0.00179731
576	CCNA_01419	0.00179681
577	CCNA_02350	0.00179414
578	CCNA_00811	0.00179376
579	chlI	0.00179365
580	CCNA_01274	0.00179211
581	CCNA_00222	0.00179172
582	CCNA_01164	0.00178912
583	nuoB	0.00178902
584	CCNA_02339	0.00178661
585	CCNA_01651	0.00178299
586	CCNA_03057	0.00178206
587	CCNA_02221	0.00178075
588	CCNA_02915	0.00177749
589	CCNA_03492	0.00177518
590	CCNA_00278	0.00177461
591	CCNA_03731	0.00176892
592	lpxA	0.00176706
593	CCNA_01904	0.00176424
594	CCNA_02882	0.00176424
595	CCNA_03015	0.00176371
596	CCNA_02014	0.00176219
597	CCNA_00227	0.00176176
598	CCNA_00397	0.00176166
599	CCNA_00885	0.00176101
600	dnaE	0.00176068
601	CCNA_00003	0.00175971
602	CCNA_00415	0.00175819
603	CCNA_02640	0.00175742
604	CCNA_03549	0.00175578
605	CCNA_01645	0.00175427
606	CCNA_02305	0.00175325
607	CCNA_01604	0.00175205
608	CCNA_00136	0.00175054
609	CCNA_03435	0.00174939
610	nasE	0.00174525
611	CCNA_00417	0.00174368
612	CCNA_01637	0.00174136
613	nuoD	0.00174035
614	CCNA_02224	0.00173809
615	CCNA_03316	0.00173545
616	CCNA_01567	0.00173434
617	CCNA_03835	0.00173333
618	CCNA_01195	0.00173038
619	scpA	0.00172906
620	CCNA_02204	0.00172553
621	CCNA_01591	0.00172519
622	CCNA_02540	0.00172097
623	CCNA_01598	0.00170762
624	CCNA_03686	0.00170642
625	CCNA_R0167	0.00170463
626	CCNA_03190	0.00170463
627	CCNA_03448	0.00170353
628	CCNA_02446	0.00169546
629	CCNA_02638	0.00169069
630	CCNA_01714	0.00168402
631	CCNA_03772	0.00168236
632	CCNA_01288	0.00168076
633	leuC	0.00167726
634	pleC	0.00167623
635	CCNA_01481	0.00167309
636	CCNA_01618	0.00167107
637	CCNA_01507	0.00166953
638	CCNA_00855	0.00166819
639	CCNA_01554	0.00166819
640	CCNA_02233	0.00166819
641	CCNA_03277	0.00166755
642	CCNA_03656	0.00166377
643	CCNA_00228	0.00166246
644	CCNA_01184	0.00166013
645	CCNA_00428	0.00165747
646	CCNA_01877	0.00165386
647	nuoG	0.00165236
648	CCNA_03637	0.00165171
649	CCNA_R0126	0.00163485
650	CCNA_01480	0.00163417
651	CCNA_01180	0.00163355
652	CCNA_03180	0.00163001
653	CCNA_01342	0.00162937
654	CCNA_01734	0.00162645
655	CCNA_00761	0.00162542
656	CCNA_00614	0.00162502
657	CCNA_02096	0.00162217
658	lpxD	0.00162106
659	CCNA_01111	0.00161873
660	CCNA_02336	0.00161654
661	CCNA_01823	0.00161517
662	leuB	0.00161456
663	CCNA_02830	0.00161052
664	CCNA_01562	0.00160897
665	CCNA_02395	0.0016051
666	CCNA_01747	0.00160494
667	sdhC	0.00160321
668	CCNA_00625	0.00159756
669	CCNA_02040	0.00159657
670	CCNA_00412	0.00159642
671	dprA	0.00159372
672	CCNA_02404	0.00159126
673	CCNA_00413	0.00159102
674	CCNA_03297	0.00158979
675	CCNA_02942	0.00158518
676	gyrB	0.00158343
677	CCNA_02610	0.00158188
678	CCNA_00072	0.00157849
679	CCNA_R0170	0.00157073
680	CCNA_03649	0.00157016
681	CCNA_02449	0.00156781
682	fzeB	0.00156772
683	CCNA_02222	0.00156529
684	CCNA_02052	0.00156366
685	sspB	0.00156132
686	CCNA_00023	0.00156027
687	CCNA_02100	0.00155629
688	CCNA_01193	0.00155356
689	CCNA_00398	0.00155233
690	CCNA_01219	0.00155154
691	CCNA_02077	0.00154916
692	CCNA_03790	0.00154846
693	CCNA_00149	0.00154149
694	CCNA_02210	0.00153649
695	CCNA_01174	0.00153522
696	CCNA_03830	0.00153184
697	CCNA_00556	0.00152859
698	divL	0.00152271
699	chpT	0.00151367
700	CCNA_01032	0.0015118
701	CCNA_02002	0.00150421
702	CCNA_01218	0.00150389
703	CCNA_03887	0.00150274
704	CCNA_00384	0.00149935
705	CCNA_01165	0.00149879
706	CCNA_03213	0.00149582
707	CCNA_00192	0.00149337
708	CCNA_02154	0.00147864
709	CCNA_01561	0.00147236
710	CCNA_R0146	0.00147032
711	CCNA_00880	0.00146014
712	CCNA_02372	0.0014601
713	CCNA_02913	0.00145874
714	CCNA_00333	0.00145764
715	CCNA_02220	0.0014546
716	CCNA_03309	0.00145426
717	CCNA_00157	0.001454
718	CCNA_01398	0.00145336
719	CCNA_03677	0.00145283
720	moaC	0.00144783
721	CCNA_R0197	0.00144583
722	CCNA_02012	0.00143022
723	CCNA_01563	0.00142906
724	CCNA_03607	0.00142378
725	CCNA_02986	0.00142173
726	CCNA_00600	0.00142145
727	CCNA_00990	0.00141864
728	CCNA_00423	0.00141448
729	CCNA_02891	0.00141448
730	CCNA_00824	0.00141376
731	CCNA_02539	0.0014132
732	CCNA_02636	0.00141017
733	CCNA_01648	0.00140825
734	CCNA_00288	0.00140608
735	CCNA_R0173	0.00140419
736	CCNA_02290	0.00140014
737	CCNA_03451	0.00139937
738	CCNA_03650	0.00139922
739	CCNA_03773	0.00139783
740	CCNA_01865	0.00139538
741	CCNA_00760	0.00139277
742	CCNA_01914	0.00139152
743	CCNA_00516	0.00138471
744	CCNA_01256	0.00138081
745	CCNA_R0179	0.00137512
746	CCNA_03408	0.00137381
747	tonB1	0.00137198
748	CCNA_03756	0.00136953
749	CCNA_00547	0.00136284
750	CCNA_02127	0.00135817
751	CCNA_03743	0.00135567
752	CCNA_R0132	0.00135545
753	CCNA_00386	0.0013547
754	CCNA_00125	0.00135467
755	CCNA_02548	0.00135058
756	CCNA_03115	0.00134892
757	CCNA_02430	0.00134595
758	CCNA_02741	0.00133747
759	CCNA_03905	0.00132739
760	CCNA_00481	0.00132703
761	CCNA_02412	0.00132687
762	CCNA_02298	0.00132259
763	CCNA_03226	0.00132066
764	gltB	0.00131816
765	CCNA_03313	0.00131739
766	CCNA_01760	0.0013146
767	CCNA_01446	0.00131098
768	CCNA_01732	0.00130978
769	CCNA_01886	0.0013095
770	rodA	0.00130942
771	CCNA_02934	0.00130817
772	CCNA_01500	0.00130735
773	CCNA_02554	0.0013063
774	dnaQ	0.00130523
775	CCNA_02619	0.00130101
776	CCNA_00881	0.00129936
777	CCNA_01647	0.00129767
778	nuoI	0.00129482
779	CCNA_02153	0.00129349
780	CCNA_01227	0.00129252
781	CCNA_01248	0.00128985
782	CCNA_03431	0.00128927
783	CCNA_02399	0.0012887
784	CCNA_01623	0.00128737
785	CCNA_02887	0.0012865
786	CCNA_01137	0.00128101
787	recJ	0.00128023
788	CCNA_03837	0.0012744
789	CCNA_02245	0.00126823
790	CCNA_00150	0.00126738
791	CCNA_02729	0.00126615
792	CCNA_02916	0.00126603
793	CCNA_00022	0.00125922
794	CCNA_00310	0.00125641
795	CCNA_02826	0.00125526
796	CCNA_03978	0.00125436
797	CCNA_01652	0.00124555
798	CCNA_02384	0.00124124
799	CCNA_02253	0.00123916
800	CCNA_01863	0.00123881
801	CCNA_01277	0.00123222
802	CCNA_03651	0.00123076
803	CCNA_00126	0.00122315
804	CCNA_00090	0.00121749
805	CCNA_00223	0.00121543
806	CCNA_01899	0.0012154
807	CCNA_00552	0.00121208
808	CCNA_03697	0.00120414
809	CCNA_03985	0.00119902
810	CCNA_02889	0.00119528
811	CCNA_00970	0.00119104
812	CCNA_02118	0.0011883
813	serS	0.00118322
814	kdpD	0.00118311
815	CCNA_00541	0.00118311
816	CCNA_00602	0.00117995
817	CCNA_00143	0.00117788
818	bamF	0.0011742
819	CCNA_03714	0.00116984
820	CCNA_01228	0.00116494
821	CCNA_03981	0.00115978
822	CCNA_02417	0.00115924
823	CCNA_00989	0.00115512
824	CCNA_03776	0.00115498
825	CCNA_03324	0.00115445
826	CCNA_01513	0.00114993
827	imuB	0.00114993
828	CCNA_00266	0.00114993
829	CCNA_01619	0.00114614
830	CCNA_01542	0.00113867
831	dinB	0.00113735
832	CCNA_01176	0.00113454
833	CCNA_00385	0.00113407
834	CCNA_02589	0.00112544
835	CCNA_00351	0.00112126
836	CCNA_02256	0.00112118
837	CCNA_01638	0.00111884
838	CCNA_00503	0.00111763
839	CCNA_02405	0.00111689
840	CCNA_01192	0.00111251
841	CCNA_02757	0.00111251
842	CCNA_03873	0.00110691
843	CCNA_03660	0.00110478
844	CCNA_02196	0.00109679
845	CCNA_02093	0.00109567
846	CCNA_01396	0.00108624
847	CCNA_01955	0.00107922
848	CCNA_00388	0.00107824
849	CCNA_01286	0.00107583
850	CCNA_03081	0.00107564
851	CCNA_01761	0.00106397
852	stpD	0.00106029
853	lolE	0.0010583
854	CCNA_03052	0.00105289
855	ftsX	0.00104397
856	CCNA_03700	0.00104347
857	CCNA_R0149	0.00103203
858	CCNA_R0130	0.00102299
859	CCNA_00040	0.00102255
860	CCNA_02202	0.00102138
861	CCNA_03502	0.00102096
862	CCNA_00809	0.00100813
863	CCNA_01460	0.0010063
864	CCNA_00792	0.00100564
865	CCNA_00963	0.00100564
866	CCNA_03843	0.00100206
867	CCNA_00145	0.000997504
868	CCNA_02161	0.000994082
869	nuoL	0.000990065
870	CCNA_02062	0.000989853
871	CCNA_00746	0.000986345
872	CCNA_02073	0.00098119
873	CCNA_00857	0.00097714
874	CCNA_01916	0.000961377
875	CCNA_02538	0.000961005
876	CCNA_00780	0.000959158
877	CCNA_03524	0.000956471
878	CCNA_03494	0.000949969
879	CCNA_02386	0.000949702
880	CCNA_01213	0.000943945
881	CCNA_00122	0.000941283
882	CCNA_03729	0.000937447
883	CCNA_03555	0.000936306
884	CCNA_03583	0.000930041
885	CCNA_00259	0.000928189
886	CCNA_00120	0.000912453
887	CCNA_03646	0.000912193
888	CCNA_03815	0.000911031
889	CCNA_00555	0.000909526
890	CCNA_01207	0.000902496
891	CCNA_03202	0.000902306
892	terB	0.000899556
893	CCNA_01745	0.000895661
894	CCNA_02483	0.000893574
895	CCNA_03771	0.000891167
896	CCNA_02975	0.000886896
897	CCNA_00253	0.000884199
898	CCNA_00243	0.000883409
899	CCNA_01153	0.000878217
900	CCNA_03475	0.000874285
901	CCNA_02097	0.000873749
902	CCNA_00039	0.000871392
903	CCNA_02006	0.000866325
904	CCNA_01897	0.000862796
905	CCNA_02085	0.000862667
906	CCNA_02190	0.000861772
907	CCNA_01431	0.000860225
908	CCNA_01620	0.000859528
909	CCNA_02491	0.000859528
910	rpsE	0.000852377
911	CCNA_03082	0.000851203
912	CCNA_03576	0.000851131
913	CCNA_02839	0.000850209
914	CCNA_R0184	0.000849567
915	CCNA_03796	0.000848435
916	CCNA_03421	0.000847199
917	CCNA_03402	0.000845338
918	CCNA_00337	0.000845192
919	CCNA_00939	0.000844397
920	CCNA_03675	0.000844165
921	CCNA_03542	0.000844126
922	mopB	0.000844016
923	CCNA_00209	0.000844016
924	CCNA_03380	0.000838837
925	CCNA_01978	0.000838531
926	CCNA_00035	0.000836298
927	CCNA_01057	0.000836116
928	CCNA_00108	0.000834627
929	CCNA_02068	0.000824799
930	CCNA_01337	0.000824263
931	CCNA_00080	0.000824062
932	CCNA_02090	0.000822167
933	CCNA_R0027	0.000822128
934	CCNA_01980	0.000821777
935	CCNA_03488	0.000821316
936	CCNA_01269	0.000815413
937	CCNA_03066	0.000814954
938	CCNA_01487	0.000813395
939	CCNA_R0118	0.000812362
940	CCNA_03433	0.000810049
941	CCNA_01843	0.000809535
942	CCNA_01713	0.000808681
943	CCNA_01071	0.000807007
944	CCNA_03328	0.0008067
945	CCNA_00368	0.000804642
946	CCNA_03467	0.000804291
947	mtgA	0.000798349
948	CCNA_01204	0.000796951
949	imuA	0.00079357
950	CCNA_02110	0.000787362
951	CCNA_02160	0.000785814
952	pssY	0.000785684
953	CCNA_R0134	0.000784908
954	CCNA_03965	0.000782416
955	CCNA_01686	0.000777846
956	CCNA_02099	0.00077433
957	CCNA_03445	0.000772206
958	CCNA_03168	0.000768347
959	cenR	0.000768118
960	CCNA_00378	0.00076774
961	CCNA_03680	0.000758937
962	CCNA_02892	0.000754178
963	CCNA_03485	0.000753283
964	CCNA_00810	0.000750606
965	CCNA_01566	0.000747293
966	CCNA_02076	0.000746315
967	CCNA_01907	0.000739759
968	CCNA_02171	0.000739138
969	CCNA_01917	0.000738979
970	CCNA_02912	0.000734712
971	CCNA_02632	0.000734108
972	dapA	0.000726698
973	CCNA_01948	0.000724633
974	CCNA_02383	0.000724534
975	moaB	0.000722656
976	hemE	0.000722379
977	CCNA_03414	0.00071715
978	CCNA_03147	0.000716681
979	CCNA_01606	0.000710546
980	CCNA_00595	0.000709769
981	CCNA_00380	0.000708995
982	CCNA_02301	0.000708195
983	CCNA_01299	0.000706936
984	CCNA_03446	0.000703734
985	CCNA_02182	0.000700642
986	CCNA_01371	0.00069623
987	xynB2	0.000684486
988	CCNA_00618	0.000681113
989	CCNA_02470	0.000681113
990	CCNA_02794	0.000681113
991	CCNA_01879	0.000681113
992	CCNA_01377	0.00067663
993	CCNA_02627	0.000674248
994	hemH	0.000667345
995	CCNA_02526	0.000666378
996	CCNA_01124	0.000664831
997	CCNA_R0122	0.000661841
998	CCNA_01373	0.000659439
999	CCNA_02883	0.000649379
1000	CCNA_02859	0.000642211
1001	CCNA_03597	0.000641023
1002	CCNA_R0125	0.000637062
1003	CCNA_R0057	0.00063335
1004	CCNA_02837	0.000626682
1005	CCNA_02008	0.000625989
1006	CCNA_01656	0.000624875
1007	CCNA_01226	0.00062131
1008	CCNA_R0006	0.000614195
1009	CCNA_01883	0.000612272
1010	CCNA_02232	0.000612272
1011	CCNA_03018	0.000612272
1012	CCNA_00381	0.000612272
1013	CCNA_03377	0.000612272
1014	CCNA_00182	0.000612272
1015	CCNA_01977	0.000611544
1016	CCNA_01399	0.000608928
1017	hipB	0.000605159
1018	CCNA_01772	0.000602213
1019	CCNA_01905	0.00060065
1020	CCNA_01543	0.000596505
1021	CCNA_01363	0.000594285
1022	rpsN	0.000592676
1023	CCNA_02630	0.000588523
1024	rplX	0.000586977
1025	CCNA_03674	0.000583093
1026	CCNA_03058	0.000576967
1027	CCNA_01478	0.000572892
1028	CCNA_02184	0.000572213
1029	CCNA_02762	0.000570903
1030	CCNA_02461	0.000568989
1031	CCNA_00562	0.000567505
1032	CCNA_03299	0.00056695
1033	CCNA_02371	0.000563431
1034	CCNA_02349	0.000562409
1035	CCNA_00933	0.000559379
1036	CCNA_03332	0.000556119
1037	CCNA_03744	0.000554611
1038	CCNA_02227	0.000553743
1039	CCNA_03795	0.000543728
1040	CCNA_01497	0.000538875
1041	CCNA_03874	0.000538381
1042	CCNA_03911	0.000537103
1043	CCNA_02735	0.000535541
1044	CCNA_01232	0.000534938
1045	CCNA_01483	0.000532007
1046	CCNA_03960	0.000529597
1047	CCNA_03089	0.000528436
1048	CCNA_R0162	0.00052794
1049	CCNA_00160	0.000525715
1050	CCNA_01946	0.000525066
1051	CCNA_03736	0.00052505
1052	CCNA_01058	0.000523566
1053	CCNA_03163	0.000520651
1054	CCNA_03752	0.00051931
1055	CCNA_02007	0.000516368
1056	CCNA_00216	0.000515139
1057	CCNA_03215	0.000514756
1058	CCNA_01188	0.00050755
1059	CCNA_03862	0.0005064
1060	CCNA_R0021	0.00050453
1061	CCNA_R0108	0.000499258
1062	CCNA_00329	0.000499177
1063	CCNA_00861	0.000498257
1064	lpxB	0.000497696
1065	CCNA_03363	0.000494624
1066	CCNA_01099	0.000493625
1067	CCNA_01882	0.00049348
1068	divJ	0.000491794
1069	CCNA_01237	0.000487444
1070	CCNA_03461	0.000486639
1071	CCNA_00548	0.00048353
1072	CCNA_R0156	0.000483309
1073	CCNA_02415	0.000481628
1074	CCNA_02279	0.000479298
1075	CCNA_02346	0.00047786
1076	pbpC	0.000477817
1077	CCNA_01615	0.000476491
1078	CCNA_00708	0.000473213
1079	pdxA	0.000470157
1080	CCNA_02531	0.000463805
1081	CCNA_02576	0.000463201
1082	CCNA_03622	0.000461758
1083	CCNA_01929	0.000459949
1084	CCNA_R0058	0.00045814
1085	CCNA_03667	0.000458039
1086	CCNA_02049	0.000456449
1087	CCNA_02786	0.000455189
1088	CCNA_02261	0.00045513
1089	CCNA_01581	0.000452135
1090	CCNA_00255	0.000450437
1091	CCNA_02066	0.000447752
1092	CCNA_00890	0.000446699
1093	CCNA_00883	0.000446699
1094	CCNA_00528	0.000446024
1095	CCNA_03794	0.000444766
1096	CCNA_02873	0.000442948
1097	CCNA_02048	0.000441337
1098	CCNA_03844	0.000437379
1099	CCNA_00395	0.000436646
1100	CCNA_02764	0.000434635
1101	CCNA_03947	0.000431503
1102	CCNA_02067	0.000428823
1103	CCNA_02631	0.000428019
1104	CCNA_00186	0.000427729
1105	CCNA_01011	0.000425588
1106	CCNA_01444	0.000424955
1107	CCNA_02026	0.000424171
1108	CCNA_03853	0.000423021
1109	CCNA_03383	0.000422863
1110	CCNA_02522	0.000422101
1111	CCNA_02368	0.000419937
1112	CCNA_03924	0.00041844
1113	CCNA_03867	0.00041704
1114	CCNA_03509	0.000416204
1115	CCNA_02369	0.000416027
1116	hfsC	0.000416003
1117	mreC	0.000415693
1118	CCNA_03541	0.000413838
1119	CCNA_02429	0.000412209
1120	CCNA_03671	0.000412074
1121	CCNA_03407	0.000411975
1122	CCNA_01835	0.000405473
1123	CCNA_02679	0.000400218
1124	CCNA_03703	0.000399322
1125	CCNA_02920	0.000397958
1126	ubiA	0.000397958
1127	CCNA_02439	0.000397958
1128	CCNA_01151	0.000397829
1129	CCNA_02375	0.000396099
1130	CCNA_00260	0.000392561
1131	CCNA_R0016	0.00039066
1132	CCNA_03617	0.000390576
1133	CCNA_01271	0.000385845
1134	CCNA_01595	0.00038516
1135	CCNA_00191	0.000384738
1136	CCNA_01806	0.000384533
1137	CCNA_00190	0.000383621
1138	CCNA_01147	0.000375532
1139	CCNA_01203	0.000374435
1140	CCNA_01033	0.00037303
1141	CCNA_03780	0.000372378
1142	CCNA_R0186	0.000371672
1143	CCNA_01279	0.000370212
1144	CCNA_02851	0.000368616
1145	CCNA_03047	0.000368616
1146	CCNA_01629	0.000368328
1147	CCNA_02174	0.000368211
1148	cckA	0.000367767
1149	CCNA_00220	0.000367305
1150	CCNA_01808	0.000366884
1151	bamB	0.000366804
1152	CCNA_02102	0.000366752
1153	CCNA_01273	0.000366752
1154	CCNA_01961	0.000366561
1155	CCNA_00376	0.000365248
1156	malA	0.000364706
1157	CCNA_03526	0.00036462
1158	CCNA_00006	0.000364188
1159	CCNA_00361	0.000357033
1160	CCNA_02172	0.000355231
1161	CCNA_01035	0.000354904
1162	CCNA_02333	0.000354576
1163	CCNA_01902	0.000353507
1164	CCNA_R0099	0.000352185
1165	hfsB	0.000351415
1166	CCNA_01252	0.000350125
1167	CCNA_00679	0.000348388
1168	CCNA_00298	0.000348388
1169	CCNA_00841	0.000348388
1170	CCNA_00025	0.000345557
1171	CCNA_R0026	0.000345139
1172	CCNA_03365	0.00034474
1173	CCNA_02676	0.000343928
1174	CCNA_00327	0.000341604
1175	CCNA_03364	0.000341178
1176	CCNA_01236	0.000340578
1177	CCNA_00379	0.000338914
1178	CCNA_00532	0.000337967
1179	CCNA_01789	0.00033696
1180	CCNA_02338	0.00033338
1181	flmD	0.000332775
1182	CCNA_R0097	0.000331503
1183	CCNA_R0159	0.000330617
1184	CCNA_00091	0.000330015
1185	moaA	0.000329659
1186	CCNA_03211	0.000328571
1187	CCNA_02818	0.000327764
1188	CCNA_01381	0.000327416
1189	CCNA_R0192	0.000326599
1190	CCNA_01829	0.000326585
1191	CCNA_03709	0.000325457
1192	CCNA_03290	0.000325305
1193	CCNA_00272	0.000324305
1194	CCNA_02397	0.000323035
1195	CCNA_01821	0.000323035
1196	CCNA_01400	0.000322469
1197	CCNA_02919	0.000322357
1198	CCNA_03088	0.000322357
1199	CCNA_03962	0.00032209
1200	CCNA_02754	0.000321424
1201	CCNA_00217	0.000320829
1202	CCNA_03201	0.000320753
1203	CCNA_03610	0.000319492
1204	CCNA_00057	0.000319368
1205	dnaJ	0.000318229
1206	CCNA_00047	0.000317925
1207	CCNA_00059	0.000317828
1208	CCNA_02443	0.000316614
1209	CCNA_03834	0.000315457
1210	CCNA_03774	0.000314394
1211	recF	0.000311233
1212	CCNA_01225	0.000310539
1213	metK	0.000310442
1214	CCNA_02120	0.000309376
1215	xylR	0.000308637
1216	CCNA_03595	0.000308268
1217	bamA	0.000307474
1218	CCNA_03778	0.000306678
1219	parD-1	0.00030663
1220	CCNA_01910	0.000304826
1221	CCNA_01676	0.000304183
1222	CCNA_01352	0.000304135
1223	CCNA_03388	0.000303411
1224	CCNA_02673	0.000303199
1225	CCNA_00998	0.000303152
1226	CCNA_00742	0.000301885
1227	CCNA_02302	0.000300744
1228	CCNA_03159	0.000300639
1229	CCNA_03611	0.000299675
1230	CCNA_02207	0.000299129
1231	CCNA_02726	0.000299098
1232	CCNA_02888	0.000297952
1233	CCNA_R0017	0.000297013
1234	CCNA_02434	0.000296539
1235	CCNA_00038	0.000295443
1236	CCNA_01267	0.000294853
1237	CCNA_03854	0.000293588
1238	CCNA_01235	0.000293324
1239	CCNA_03107	0.000292988
1240	CCNA_00511	0.00029274
1241	CCNA_02365	0.000292503
1242	CCNA_00501	0.000292203
1243	uvrD	0.000291985
1244	CCNA_02835	0.000291474
1245	CCNA_00056	0.000290562
1246	CCNA_03839	0.000290474
1247	CCNA_01215	0.000287648
1248	CCNA_01765	0.000287397
1249	narK	0.000287229
1250	CCNA_R0073	0.000286442
1251	CCNA_01696	0.000286183
1252	CCNA_03204	0.00028579
1253	CCNA_00756	0.00028491
1254	CCNA_02054	0.000283713
1255	CCNA_02069	0.000283709
1256	CCNA_00682	0.000283642
1257	CCNA_03456	0.000282966
1258	parD-4	0.0002825
1259	CCNA_00622	0.000281921
1260	CCNA_R0036	0.000279976
1261	CCNA_02214	0.000279364
1262	rplV	0.000279356
1263	CCNA_01577	0.000277134
1264	CCNA_03086	0.000276554
1265	CCNA_00326	0.000276353
1266	bioC	0.000275782
1267	CCNA_03398	0.000275438
1268	CCNA_R0163	0.000273344
1269	CCNA_02659	0.000271855
1270	ccmA	0.000271804
1271	CCNA_R0175	0.00027111
1272	CCNA_00360	0.000269626
1273	CCNA_00642	0.000268946
1274	CCNA_02065	0.000267828
1275	CCNA_02558	0.000267321
1276	CCNA_01786	0.000267078
1277	CCNA_01289	0.000265148
1278	CCNA_R0015	0.000264815
1279	CCNA_00986	0.000263014
1280	CCNA_03594	0.00026295
1281	CCNA_01163	0.000262772
1282	CCNA_03221	0.00026214
1283	alkB	0.000260765
1284	CCNA_01558	0.000259723
1285	CCNA_01728	0.000258366
1286	CCNA_03126	0.000258163
1287	CCNA_02468	0.00025536
1288	CCNA_03354	0.0002547
1289	CCNA_00194	0.000254554
1290	CCNA_00603	0.000253204
1291	CCNA_00171	0.00025301
1292	rfaE	0.000252602
1293	CCNA_01183	0.000252122
1294	CCNA_01717	0.000251728
1295	CCNA_03532	0.000251564
1296	CCNA_00140	0.000251516
1297	CCNA_03899	0.000250957
1298	CCNA_00112	0.000250739
1299	CCNA_00680	0.000250441
1300	CCNA_03659	0.000249744
1301	celD	0.000249741
1302	CCNA_03002	0.000248891
1303	CCNA_01610	0.000248647
1304	CCNA_03178	0.000246109
1305	glpX	0.000246075
1306	CCNA_03382	0.000244664
1307	CCNA_03098	0.000243972
1308	CCNA_01697	0.000243901
1309	CCNA_03647	0.000242257
1310	CCNA_01408	0.000241403
1311	fzeA	0.000240564
1312	CCNA_00302	0.000239301
1313	CCNA_02590	0.000238846
1314	CCNA_03603	0.000237846
1315	CCNA_03210	0.000237808
1316	CCNA_R0191	0.000237673
1317	CCNA_01625	0.000236428
1318	CCNA_00071	0.000235955
1319	phoR	0.000235886
1320	CCNA_01036	0.000235727
1321	CCNA_03620	0.000235727
1322	CCNA_00362	0.000235575
1323	CCNA_00921	0.000235556
1324	CCNA_03663	0.000235369
1325	CCNA_02985	0.000234794
1326	CCNA_R0012	0.000234716
1327	CCNA_00521	0.000234153
1328	CCNA_00304	0.000233403
1329	CCNA_02613	0.000232865
1330	CCNA_02435	0.000231578
1331	CCNA_03358	0.000231082
1332	CCNA_00893	0.000231058
1333	CCNA_03454	0.000230476
1334	smc	0.000228882
1335	CCNA_01709	0.000228371
1336	CCNA_01989	0.000226851
1337	CCNA_03489	0.000226809
1338	CCNA_01694	0.000226809
1339	CCNA_02897	0.000226809
1340	vanB	0.000226809
1341	CCNA_R0079	0.000226809
1342	CCNA_03225	0.000226809
1343	CCNA_01282	0.000226809
1344	CCNA_02262	0.000226809
1345	CCNA_00572	0.000226809
1346	CCNA_00335	0.000226809
1347	CCNA_02955	0.000226809
1348	CCNA_00856	0.000226809
1349	CCNA_01925	0.000226697
1350	CCNA_03847	0.00022632
1351	CCNA_03961	0.000226051
1352	CCNA_00060	0.000225848
1353	CCNA_00478	0.000225113
1354	CCNA_03439	0.000223183
1355	CCNA_02577	0.000220692
1356	hdaA	0.00022012
1357	CCNA_R0080	0.000219781
1358	CCNA_00656	0.000219207
1359	CCNA_01650	0.000219039
1360	CCNA_R0003	0.000217784
1361	CCNA_00510	0.000217698
1362	CCNA_R0011	0.000216724
1363	CCNA_03986	0.000216664
1364	CCNA_01266	0.000214963
1365	CCNA_03471	0.00021441
1366	CCNA_03278	0.000214289
1367	CCNA_02337	0.000213578
1368	CCNA_02827	0.000213265
1369	CCNA_00121	0.0002126
1370	lpxI	0.000212462
1371	CCNA_01960	0.000212378
1372	CCNA_01491	0.000211619
1373	CCNA_03148	0.0002116
1374	CCNA_02385	0.000211411
1375	CCNA_03746	0.000210908
1376	CCNA_00275	0.000210809
1377	CCNA_00688	0.000210439
1378	CCNA_02896	0.00021007
1379	CCNA_02274	0.00020886
1380	CCNA_00458	0.000208235
1381	CCNA_03369	0.000208226
1382	CCNA_00055	0.000207082
1383	CCNA_01885	0.000206901
1384	CCNA_02111	0.000206479
1385	CCNA_00088	0.000206372
1386	CCNA_03974	0.00020575
1387	CCNA_03527	0.000205748
1388	CCNA_02101	0.000205326
1389	CCNA_01104	0.000204795
1390	CCNA_00383	0.000202893
1391	CCNA_01568	0.000202162
1392	CCNA_02832	0.000200404
1393	CCNA_01556	0.000199203
1394	CCNA_00425	0.00019859
1395	CCNA_01085	0.000197471
1396	CCNA_00123	0.000197296
1397	CCNA_03355	0.000197192
1398	uxaA	0.000197164
1399	CCNA_00147	0.00019701
1400	leuD	0.000196271
1401	CCNA_00393	0.000195198
1402	CCNA_01539	0.00019511
1403	CCNA_03185	0.000194327
1404	CCNA_01265	0.000194324
1405	CCNA_03763	0.000193956
1406	CCNA_01791	0.000192011
1407	CCNA_00911	0.00019182
1408	CCNA_03602	0.000191638
1409	CCNA_01333	0.000191545
1410	CCNA_03412	0.000191358
1411	CCNA_00131	0.000191065
1412	CCNA_03977	0.000190711
1413	CCNA_01653	0.000190437
1414	nagA	0.000190423
1415	CCNA_03531	0.000189613
1416	CCNA_02094	0.000189108
1417	CCNA_03194	0.00018882
1418	CCNA_01169	0.000188217
1419	mmpA	0.000187717
1420	CCNA_01605	0.000186119
1421	CCNA_00889	0.000185373
1422	tolB	0.000184804
1423	CCNA_01777	0.000184599
1424	CCNA_01216	0.000184012
1425	CCNA_R0078	0.000183646
1426	CCNA_00359	0.000182984
1427	iolE	0.000182417
1428	vapC	0.000182129
1429	CCNA_01292	0.000182081
1430	CCNA_00021	0.000181604
1431	malK	0.000181067
1432	CCNA_00641	0.000180504
1433	CCNA_00774	0.000180397
1434	CCNA_01672	0.000180354
1435	CCNA_01194	0.00017976
1436	CCNA_00399	0.00017704
1437	iolR	0.000176888
1438	CCNA_01682	0.000176165
1439	CCNA_00601	0.000175983
1440	CCNA_00394	0.00017589
1441	idhA	0.000175431
1442	CCNA_01971	0.000175199
1443	CCNA_02013	0.000174842
1444	CCNA_02403	0.000174521
1445	CCNA_00567	0.000174469
1446	CCNA_00831	0.000174469
1447	CCNA_03227	0.000174042
1448	ybgF	0.000173497
1449	CCNA_01874	0.000173097
1450	tolA	0.000173022
1451	CCNA_03612	0.000171905
1452	CCNA_01231	0.000171464
1453	CCNA_02745	0.000171464
1454	nuoK	0.000171158
1455	CCNA_01994	0.000170965
1456	CCNA_01439	0.000170912
1457	CCNA_03811	0.000170374
1458	CCNA_03021	0.000170037
1459	CCNA_01557	0.000169931
1460	clpA	0.000168801
1461	lpxK	0.00016824
1462	CCNA_00454	0.000167439
1463	CCNA_00892	0.000167138
1464	CCNA_00201	0.000167062
1465	CCNA_03447	0.000166348
1466	CCNA_03880	0.000164681
1467	CCNA_03026	0.000164681
1468	CCNA_00019	0.000164304
1469	CCNA_00124	0.000164284
1470	CCNA_02909	0.000164056
1471	CCNA_03496	0.000163554
1472	CCNA_R0116	0.000163264
1473	CCNA_02072	0.000162035
1474	CCNA_01908	0.000161481
1475	CCNA_01191	0.000161464
1476	CCNA_01719	0.000160187
1477	CCNA_02885	0.00016017
1478	CCNA_03203	0.000159217
1479	CCNA_01759	0.000158572
1480	CCNA_03831	0.000158135
1481	CCNA_00457	0.000158021
1482	CCNA_02055	0.00015773
1483	CCNA_01452	0.000157678
1484	CCNA_03403	0.000157551
1485	CCNA_02755	0.000157345
1486	tolQ	0.000156979
1487	CCNA_03979	0.000156824
1488	nusA	0.000156789
1489	CCNA_02082	0.000155961
1490	CCNA_01068	0.000155906
1491	CCNA_01600	0.000155742
1492	CCNA_02732	0.00015498
1493	CCNA_03480	0.000153382
1494	CCNA_02796	0.000153267
1495	CCNA_01718	0.000152117
1496	CCNA_00111	0.000151752
1497	CCNA_03223	0.000151593
1498	CCNA_03440	0.000150587
1499	CCNA_01755	0.000150587
1500	CCNA_01927	0.00015038
1501	fliX	0.000150331
1502	CCNA_03733	0.000150325
1503	CCNA_03679	0.000149839
1504	CCNA_01722	0.000149142
1505	CCNA_03458	0.000148278
1506	CCNA_00962	0.000148278
1507	CCNA_01016	0.000147663
1508	CCNA_00226	0.000147525
1509	CCNA_03000	0.00014748
1510	CCNA_00971	0.000147168
1511	CCNA_03845	0.00014611
1512	CCNA_03848	0.000146058
1513	CCNA_03483	0.000145629
1514	CCNA_00037	0.000144191
1515	CCNA_00525	0.000143858
1516	CCNA_00604	0.00014351
1517	CCNA_01270	0.000143199
1518	pbpZ	0.000142795
1519	clpS	0.000142386
1520	CCNA_01824	0.000142049
1521	kefB	0.000141115
1522	CCNA_01775	0.000140799
1523	CCNA_01533	0.000140665
1524	CCNA_03087	0.000140486
1525	CCNA_01944	0.000139902
1526	CCNA_02321	0.000139437
1527	CCNA_03287	0.000139304
1528	CCNA_03093	0.000139035
1529	exbD	0.000138849
1530	CCNA_01911	0.000138692
1531	CCNA_01570	0.000137873
1532	CCNA_02907	0.000137873
1533	CCNA_01545	0.000137718
1534	CCNA_03540	0.000136674
1535	dnaE2	0.000135263
1536	CCNA_03370	0.000135263
1537	CCNA_00396	0.000135227
1538	CCNA_03806	0.000134602
1539	CCNA_00740	0.000134226
1540	CCNA_02352	0.000133718
1541	CCNA_R0035	0.000132891
1542	CCNA_00590	0.000132671
1543	moeB	0.000132514
1544	CCNA_02480	0.000132376
1545	CCNA_00913	0.000132214
1546	CCNA_01112	0.000132204
1547	CCNA_01501	0.000132124
1548	CCNA_00613	0.000132077
1549	CCNA_03455	0.000131448
1550	CCNA_01230	0.000131086
1551	CCNA_01202	0.000130183
1552	CCNA_00505	0.000129971
1553	CCNA_00508	0.000129678
1554	CCNA_03818	0.000128562
1555	CCNA_03827	0.000128492
1556	CCNA_R0115	0.000127831
1557	CCNA_03832	0.000127775
1558	vapB	0.000127578
1559	CCNA_02374	0.000127373
1560	CCNA_02273	0.000127138
1561	CCNA_00638	0.000126704
1562	CCNA_03413	0.000126689
1563	CCNA_01268	0.000126478
1564	CCNA_01421	0.000126219
1565	CCNA_00427	0.000125955
1566	CCNA_03761	0.000124501
1567	CCNA_R0069	0.000124366
1568	CCNA_R0087	0.000124285
1569	CCNA_02924	0.00012412
1570	CCNA_02541	0.000121628
1571	CCNA_00605	0.000121412
1572	CCNA_00061	0.000121165
1573	CCNA_00347	0.000120985
1574	bamD	0.000120861
1575	CCNA_03288	0.000120527
1576	CCNA_01122	0.00012014
1577	pgl	0.000120123
1578	CCNA_02937	0.00012003
1579	thiG	0.00011916
1580	CCNA_03508	0.00011852
1581	CCNA_01913	0.000117883
1582	CCNA_03396	0.000117479
1583	mcsS	0.000117032
1584	CCNA_01704	0.000116867
1585	CCNA_03676	0.00011685
1586	CCNA_01800	0.00011684
1587	CCNA_02159	0.000116306
1588	CCNA_00696	0.000116306
1589	CCNA_01052	0.000115992
1590	CCNA_00769	0.000115428
1591	CCNA_02418	0.000115332
1592	CCNA_R0139	0.00011523
1593	CCNA_01642	0.000115069
1594	CCNA_00637	0.000114917
1595	dipM	0.000114531
1596	CCNA_02186	0.000113864
1597	CCNA_01210	0.000113813
1598	CCNA_01950	0.000113606
1599	CCNA_02569	0.000113427
1600	CCNA_03183	0.000113401
1601	CCNA_02277	0.000113161
1602	CCNA_03283	0.000112409
1603	CCNA_02088	0.000112099
1604	CCNA_00248	0.000111962
1605	CCNA_03405	0.000111959
1606	CCNA_00664	0.000111668
1607	CCNA_03592	0.000111474
1608	CCNA_03056	0.000111404
1609	CCNA_02936	0.00011101
1610	CCNA_03371	0.000110999
1611	CCNA_03989	0.000110958
1612	CCNA_03269	0.000110763
1613	CCNA_02124	0.000110643
1614	CCNA_01100	0.00011063
1615	CCNA_R0117	0.000110604
1616	CCNA_03389	0.000110432
1617	CCNA_00480	0.000110396
1618	spdR	0.000110114
1619	CCNA_02309	0.000109935
1620	CCNA_03506	0.000109572
1621	CCNA_03704	0.000109253
1622	vanR	0.000108218
1623	CCNA_00142	0.000107767
1624	CCNA_R0172	0.000107748
1625	CCNA_00815	0.000107285
1626	CCNA_00987	0.000107277
1627	secY	0.000107263
1628	CCNA_00224	0.00010714
1629	CCNA_R0030	0.000106565
1630	CCNA_02025	0.000106186
1631	CCNA_01121	0.000106158
1632	CCNA_02804	0.000105682
1633	CCNA_03139	0.000104815
1634	tipN	0.000104739
1635	CCNA_01551	0.000104565
1636	CCNA_02021	0.000104159
1637	CCNA_02396	0.000103876
1638	CCNA_01512	0.000103671
1639	CCNA_03950	0.000103561
1640	CCNA_02662	0.000103363
1641	CCNA_02772	0.000103036
1642	CCNA_02519	0.000102978
1643	CCNA_01754	0.000102812
1644	bacA	0.000102806
1645	CCNA_02591	0.0001027
1646	CCNA_02944	0.000101589
1647	CCNA_01912	0.000101341
1648	CCNA_02725	0.000100994
1649	purH	0.000100968
1650	CCNA_01870	0.000100827
1651	CCNA_01715	0.000100365
1652	CCNA_01229	0.00010026
1653	CCNA_03533	9.98446e-05
1654	CCNA_02295	9.94401e-05
1655	CCNA_01375	9.92594e-05
1656	CCNA_00733	9.81522e-05
1657	CCNA_00274	9.74383e-05
1658	CCNA_03893	9.72336e-05
1659	CCNA_03764	9.67828e-05
1660	sucD	9.60616e-05
1661	CCNA_03286	9.57005e-05
1662	CCNA_02525	9.50941e-05
1663	CCNA_03841	9.50317e-05
1664	CCNA_00456	9.48682e-05
1665	CCNA_03920	9.47799e-05
1666	CCNA_02881	9.47756e-05
1667	CCNA_01083	9.46809e-05
1668	CCNA_02520	9.45355e-05
1669	CCNA_03802	9.45092e-05
1670	CCNA_01739	9.45061e-05
1671	CCNA_02165	9.44567e-05
1672	iolD	9.43867e-05
1673	CCNA_03966	9.43771e-05
1674	CCNA_03466	9.43656e-05
1675	CCNA_02392	9.42987e-05
1676	CCNA_03436	9.40191e-05
1677	glk	9.3876e-05
1678	CCNA_00578	9.33745e-05
1679	CCNA_03350	9.33745e-05
1680	CCNA_03254	9.33745e-05
1681	CCNA_02980	9.2987e-05
1682	ftsE	9.23665e-05
1683	CCNA_01736	9.21532e-05
1684	CCNA_01261	9.18064e-05
1685	CCNA_R0198	9.05151e-05
1686	CCNA_01484	9.04639e-05
1687	CCNA_02502	9.04465e-05
1688	rplC	9.02758e-05
1689	CCNA_00530	8.97047e-05
1690	CCNA_03670	8.94823e-05
1691	CCNA_02169	8.92921e-05
1692	CCNA_R0054	8.92055e-05
1693	CCNA_00155	8.88969e-05
1694	CCNA_00332	8.83049e-05
1695	CCNA_01044	8.8296e-05
1696	CCNA_01678	8.81981e-05
1697	CCNA_R0135	8.80792e-05
1698	phd	8.78282e-05
1699	chvG	8.77425e-05
1700	CCNA_00695	8.734e-05
1701	iolC	8.7209e-05
1702	CCNA_01209	8.71527e-05
1703	CCNA_00273	8.71279e-05
1704	CCNA_03972	8.68401e-05
1705	CCNA_03166	8.66973e-05
1706	CCNA_03419	8.66973e-05
1707	CCNA_01857	8.66973e-05
1708	CCNA_01285	8.60614e-05
1709	CCNA_00591	8.59575e-05
1710	CCNA_03645	8.569e-05
1711	exbB	8.52611e-05
1712	CCNA_R0145	8.49236e-05
1713	CCNA_03252	8.47169e-05
1714	CCNA_00712	8.47169e-05
1715	CCNA_00550	8.4664e-05
1716	CCNA_03061	8.42219e-05
1717	CCNA_01155	8.41875e-05
1718	CCNA_00549	8.40021e-05
1719	CCNA_00148	8.39104e-05
1720	CCNA_03539	8.38879e-05
1721	perB	8.35523e-05
1722	CCNA_01928	8.35351e-05
1723	CCNA_02954	8.31529e-05
1724	CCNA_02791	8.31362e-05
1725	CCNA_R0101	8.31073e-05
1726	moaE	8.29202e-05
1727	CCNA_03292	8.27163e-05
1728	CCNA_02661	8.26184e-05
1729	CCNA_00263	8.20618e-05
1730	iatA	8.19054e-05
1731	CCNA_00639	8.17296e-05
1732	CCNA_R0072	8.08462e-05
1733	CCNA_02556	8.04606e-05
1734	CCNA_00029	8.01241e-05
1735	fixJ	7.974e-05
1736	CCNA_03998	7.94229e-05
1737	CCNA_02784	7.87512e-05
1738	CCNA_03565	7.86734e-05
1739	CCNA_02185	7.74712e-05
1740	CCNA_03212	7.74127e-05
1741	CCNA_03379	7.69058e-05
1742	CCNA_01998	7.66463e-05
1743	CCNA_R0004	7.61535e-05
1744	CCNA_02080	7.60282e-05
1745	CCNA_00817	7.58447e-05
1746	CCNA_00087	7.57226e-05
1747	CCNA_02959	7.56808e-05
1748	sufE	7.53825e-05
1749	CCNA_02695	7.48937e-05
1750	CCNA_00034	7.41517e-05
1751	CCNA_03091	7.39315e-05
1752	CCNA_01120	7.35898e-05
1753	CCNA_03769	7.33064e-05
1754	CCNA_01695	7.32674e-05
1755	CCNA_03864	7.31989e-05
1756	CCNA_03661	7.30002e-05
1757	CCNA_03150	7.2753e-05
1758	CCNA_01599	7.26111e-05
1759	CCNA_01182	7.25704e-05
1760	CCNA_00070	7.21804e-05
1761	CCNA_01492	7.2142e-05
1762	CCNA_03176	7.20266e-05
1763	CCNA_02983	7.15875e-05
1764	CCNA_03983	7.13374e-05
1765	CCNA_00490	7.10504e-05
1766	CCNA_03948	7.09847e-05
1767	CCNA_00509	7.0683e-05
1768	CCNA_01673	7.06812e-05
1769	CCNA_00894	7.05893e-05
1770	CCNA_02373	7.00024e-05
1771	CCNA_00995	6.99584e-05
1772	ppk2	6.98683e-05
1773	CCNA_00558	6.9788e-05
1774	CCNA_02578	6.97407e-05
1775	CCNA_01834	6.96877e-05
1776	ctpA	6.94777e-05
1777	rplW	6.90191e-05
1778	CCNA_01015	6.85495e-05
1779	CCNA_01303	6.84356e-05
1780	malY	6.83853e-05
1781	CCNA_03366	6.8364e-05
1782	CCNA_00973	6.81958e-05
1783	CCNA_01485	6.8166e-05
1784	CCNA_03050	6.79333e-05
1785	CCNA_02313	6.79226e-05
1786	CCNA_03886	6.78623e-05
1787	CCNA_R0062	6.77502e-05
1788	CCNA_00482	6.76891e-05
1789	CCNA_00657	6.75668e-05
1790	CCNA_01578	6.71238e-05
1791	CCNA_03030	6.67349e-05
1792	CCNA_00345	6.66602e-05
1793	CCNA_02230	6.62693e-05
1794	CCNA_00403	6.61927e-05
1795	CCNA_01343	6.58804e-05
1796	CCNA_02637	6.58265e-05
1797	CCNA_00910	6.56773e-05
1798	CCNA_01794	6.5659e-05
1799	CCNA_03941	6.54956e-05
1800	CCNA_03706	6.54925e-05
1801	CCNA_02533	6.499e-05
1802	CCNA_02674	6.49724e-05
1803	CCNA_03535	6.47666e-05
1804	CCNA_03222	6.46806e-05
1805	CCNA_01785	6.46452e-05
1806	CCNA_02132	6.41184e-05
1807	CCNA_03067	6.36972e-05
1808	CCNA_00979	6.36696e-05
1809	CCNA_R0110	6.34011e-05
1810	CCNA_03167	6.33945e-05
1811	CCNA_00543	6.32918e-05
1812	CCNA_03938	6.29773e-05
1813	CCNA_01384	6.27003e-05
1814	CCNA_03094	6.26549e-05
1815	CCNA_02633	6.25979e-05
1816	CCNA_01724	6.20263e-05
1817	CCNA_02575	6.18712e-05
1818	coxA	6.18223e-05
1819	CCNA_01152	6.16165e-05
1820	CCNA_01735	6.15558e-05
1821	CCNA_03017	6.15558e-05
1822	CCNA_03390	6.14535e-05
1823	CCNA_03994	6.14086e-05
1824	CCNA_00908	6.14086e-05
1825	CCNA_02398	6.10398e-05
1826	CCNA_02752	6.08658e-05
1827	CCNA_00773	6.06171e-05
1828	CCNA_00808	6.05536e-05
1829	CCNA_02287	6.03054e-05
1830	CCNA_02542	6.02899e-05
1831	CCNA_03102	6.01192e-05
1832	CCNA_00658	6.00104e-05
1833	CCNA_00967	5.96711e-05
1834	CCNA_02771	5.96032e-05
1835	CCNA_02929	5.95462e-05
1836	CCNA_01837	5.95462e-05
1837	CCNA_00936	5.95462e-05
1838	CCNA_01393	5.94374e-05
1839	CCNA_02199	5.91298e-05
1840	CCNA_00649	5.9019e-05
1841	CCNA_02910	5.87335e-05
1842	CCNA_01531	5.81501e-05
1843	CCNA_03572	5.74194e-05
1844	CCNA_01340	5.72707e-05
1845	acrB4	5.72571e-05
1846	CCNA_02516	5.70149e-05
1847	CCNA_01721	5.68013e-05
1848	CCNA_03683	5.6665e-05
1849	CCNA_R0160	5.65071e-05
1850	CCNA_00660	5.64626e-05
1851	CCNA_01344	5.64588e-05
1852	CCNA_01394	5.6348e-05
1853	CCNA_01423	5.59063e-05
1854	CCNA_02400	5.58478e-05
1855	CCNA_03118	5.58201e-05
1856	CCNA_03105	5.55334e-05
1857	CCNA_00299	5.52411e-05
1858	CCNA_01641	5.52088e-05
1859	CCNA_00092	5.50516e-05
1860	CCNA_00133	5.50307e-05
1861	CCNA_02044	5.49185e-05
1862	CCNA_01345	5.3893e-05
1863	CCNA_00207	5.35839e-05
1864	CCNA_01142	5.35278e-05
1865	CCNA_R0131	5.33653e-05
1866	CCNA_02173	5.29982e-05
1867	CCNA_00188	5.29356e-05
1868	CCNA_01430	5.28693e-05
1869	CCNA_00517	5.28337e-05
1870	phoH	5.27015e-05
1871	CCNA_02555	5.25028e-05
1872	CCNA_00544	5.24968e-05
1873	CCNA_00705	5.24458e-05
1874	CCNA_01390	5.24047e-05
1875	CCNA_03104	5.1851e-05
1876	CCNA_01091	5.16755e-05
1877	CCNA_03392	5.15738e-05
1878	CCNA_02528	5.15554e-05
1879	CCNA_03681	5.15082e-05
1880	CCNA_03757	5.14022e-05
1881	CCNA_02819	5.14022e-05
1882	CCNA_02458	5.11686e-05
1883	CCNA_03580	5.11603e-05
1884	CCNA_03770	5.07027e-05
1885	CCNA_03228	5.06316e-05
1886	CCNA_01090	5.06009e-05
1887	CCNA_02283	5.04893e-05
1888	CCNA_01388	5.03931e-05
1889	CCNA_02730	5.03496e-05
1890	CCNA_02573	5.03333e-05
1891	CCNA_03009	5.02656e-05
1892	CCNA_02978	5.01683e-05
1893	CCNA_02760	4.97384e-05
1894	CCNA_R0178	4.96652e-05
1895	CCNA_02459	4.96054e-05
1896	CCNA_03469	4.95932e-05
1897	CCNA_01077	4.94501e-05
1898	CCNA_01559	4.93673e-05
1899	CCNA_01534	4.9236e-05
1900	CCNA_R0196	4.92249e-05
1901	CCNA_02499	4.91058e-05
1902	CCNA_02956	4.89775e-05
1903	CCNA_03260	4.89632e-05
1904	CCNA_R0174	4.8943e-05
1905	rsaD	4.88928e-05
1906	CCNA_00751	4.86505e-05
1907	acpS	4.83926e-05
1908	CCNA_00546	4.83313e-05
1909	CCNA_02740	4.82396e-05
1910	CCNA_00076	4.80417e-05
1911	CCNA_02653	4.78537e-05
1912	CCNA_03652	4.77933e-05
1913	CCNA_03498	4.76378e-05
1914	CCNA_00067	4.76037e-05
1915	CCNA_01159	4.74236e-05
1916	CCNA_02680	4.74229e-05
1917	CCNA_00276	4.73153e-05
1918	CCNA_00830	4.73083e-05
1919	dnaG	4.72375e-05
1920	CCNA_03409	4.70634e-05
1921	CCNA_03885	4.69136e-05
1922	CCNA_02009	4.6892e-05
1923	CCNA_03558	4.68377e-05
1924	CCNA_03381	4.66148e-05
1925	CCNA_01836	4.65002e-05
1926	CCNA_01349	4.62081e-05
1927	CCNA_02946	4.62008e-05
1928	CCNA_02106	4.61168e-05
1929	CCNA_00426	4.61122e-05
1930	CCNA_01347	4.60292e-05
1931	CCNA_01640	4.57985e-05
1932	rplD	4.56885e-05
1933	CCNA_00346	4.55236e-05
1934	CCNA_02758	4.54611e-05
1935	greB	4.50746e-05
1936	CCNA_00707	4.49963e-05
1937	CCNA_R0119	4.48468e-05
1938	CCNA_00993	4.4843e-05
1939	CCNA_00848	4.47696e-05
1940	CCNA_02709	4.47694e-05
1941	CCNA_00471	4.45834e-05
1942	CCNA_00432	4.44919e-05
1943	CCNA_01970	4.39199e-05
1944	parE-2	4.36343e-05
1945	CCNA_00110	4.35806e-05
1946	czcD	4.31386e-05
1947	CCNA_03284	4.30401e-05
1948	CCNA_00539	4.30264e-05
1949	CCNA_00977	4.29038e-05
1950	CCNA_R0141	4.28483e-05
1951	CCNA_00175	4.28283e-05
1952	CCNA_03348	4.27831e-05
1953	CCNA_00119	4.26098e-05
1954	CCNA_00027	4.25528e-05
1955	CCNA_02407	4.25107e-05
1956	rpsK	4.22454e-05
1957	ptrB	4.22234e-05
1958	CCNA_02098	4.21216e-05
1959	CCNA_03443	4.20401e-05
1960	CCNA_02551	4.18984e-05
1961	CCNA_01699	4.15768e-05
1962	CCNA_01069	4.15409e-05
1963	CCNA_02473	4.12519e-05
1964	iatP	4.10443e-05
1965	CCNA_02652	4.10441e-05
1966	CCNA_03060	4.08525e-05
1967	CCNA_02278	4.08417e-05
1968	CCNA_00716	4.06768e-05
1969	CCNA_01383	4.06204e-05
1970	CCNA_03632	4.01095e-05
1971	CCNA_00336	4.00171e-05
1972	CCNA_00571	4.00171e-05
1973	CCNA_01234	4.00171e-05
1974	CCNA_01891	4.00171e-05
1975	CCNA_03883	4.00171e-05
1976	CCNA_01909	3.99823e-05
1977	CCNA_00749	3.9785e-05
1978	CCNA_02988	3.9609e-05
1979	CCNA_00404	3.95651e-05
1980	CCNA_01995	3.95095e-05
1981	CCNA_00339	3.92318e-05
1982	CCNA_00290	3.91914e-05
1983	CCNA_00785	3.89236e-05
1984	CCNA_02999	3.89177e-05
1985	CCNA_03662	3.89095e-05
1986	CCNA_03282	3.86483e-05
1987	CCNA_01290	3.86096e-05
1988	CCNA_00583	3.85483e-05
1989	CCNA_02686	3.84945e-05
1990	CCNA_01685	3.82883e-05
1991	CCNA_02574	3.81562e-05
1992	CCNA_01536	3.80903e-05
1993	CCNA_02802	3.80653e-05
1994	CCNA_03020	3.80038e-05
1995	CCNA_01338	3.80019e-05
[truncated: 2,089 more rows]
