# Supplementary material for: Gene network analysis identifies a central post-transcriptional regulator of cellular stress survival
Source: eLife journal article supplement (doi:10.7554/elife.33684), 2018-03-14
Supplement: supp [file elife-33684-supp-v1.zip › elife_poa_e33684_Figure_5_source_data_1.xlsx]

## Sheet: NC_999999_transcripts
Transcription Start	Translation Start	Translation Stop	Transcription Stop	Strand	Name	Synonym	Product	Raw Counts POS Replicate 1	Raw Counts POS Replicate 2	Raw Counts POS Replicate 3	Normalized Counts POS Replicate 1	Normalized Counts POS Replicate 2	Normalized Counts POS Replicate 3	RPKM POS	Variance POS	Lowess POS	Expression POS	Raw Counts NEG Replicate 1	Raw Counts NEG Replicate 2	Normalized Counts NEG Replicate 1	Normalized Counts NEG Replicate 2	RPKM NEG	Variance NEG	Lowess NEG	Expression NEG	pValue POS vs NEG	qValue POS vs NEG
182			1	-	-	CCNA_R0094	small non-coding RNA	5019	0	0	11488	0	0	5	1486076323	1591752793	21	0	0	0	0	0	0	244	0	1	1
	202	1107		+	-	CCNA_00001	ATP/GTP-binding protein	14967	5000	1950	34259	17368	11344	4	6018508111	29337010704	23	13549	0	25373	0	3	16190355046	15287407309	14	0.606942	1
	1104	1703		+	-	CCNA_00002	septum formation protein Maf	12687	0	50	29040	0	290	3	13597790392	8289284838	16	6950	0	13015	0	2	3261594920	3672673540	10	0.580884	1
	1700	2557		+	-	CCNA_00003	shikimate 5-dehydrogenase	1320	0	3549	3021	0	20646	1	5170375981	5668610342	9	15149	1750	28369	28683	3	427952	54512110895	33	0.707863	1
	2559	3158		+	-	CCNA_00004	dephospho-CoA kinase	6799	0	0	15562	0	0	2	3079012687	2877306064	8	7549	1050	14137	17210	2	102073781	21812941048	26	0.700395	1
	3190	3903		+	dnaQ	CCNA_00005	DNA polymerase III, epsilon chain	7200	4550	2500	16480	15805	14544	3	15197733	17658844053	21	15599	4650	29212	76217	5	71106572030	170853744066	73	0.712089	1
	4022	4810		+	-	CCNA_00006	enoyl-CoA hydratase	7994	510	1050	18298	1771	6108	2	2747955356	6773150417	11	0	4135	0	67775	1	171131859086	75357586042	42	0.75512	1
4950			4292	-	-	CCNA_R0095	small non-coding RNA	93230	50	1200	213404	173	6981	26	1586109250238	459090825109	111	18650	0	34926	0	5	34859507288	25630146086	26	0.878359	1
	4960	5235		+	-	CCNA_00007	SSU ribosomal protein S20P	79458	6932	190	181880	24080	1105	56	962286127867	401062121633	250	88458	92	165657	1507	65	1430020074708	466476379329	302	0.544037	1
	5636	7108		+	dnaA	CCNA_00008	chromosome replication initiator protein DnaA	299994	34187	44795	686689	118758	260602	46	13478150515464	23627195122277	241	154015	3250	288428	53269	21	3388690120605	2168714987640	115	0.623425	1
	7790	7170		-	alkB	CCNA_00009	alkylated DNA repair protein AlkB	5550	0	0	12704	0	0	1	1891958757	1932586750	6	0	0	0	0	0	0	244	0	1	1
	8165	10060		+	dnaK	CCNA_00010	chaperone protein DnaK	14483958	33736559	15600840	33153931	117193729	90760602	6108	2.08767e+18	6.72485e+18	42388	79730672	75343988	149313966	1234944894	16595	9.22337e+18	9.22337e+18	365047	0.890913	1
	10223	11380		+	dnaJ	CCNA_00011	chaperone protein DnaJ	218029	97337	34169	499070	338128	198784	54	2657725431874	21882114026401	298	141247	13185	264517	216112	27	76295784707	4863444050577	207	0.563007	1
	11467	14178		+	mutS	CCNA_00012	DNA mismatch repair protein MutS	54149	0	5699	123947	0	33154	4	344801456487	227186572896	19	15919	3099	29811	50794	1	10262335292	106674535595	14	0.543924	1
13417			13499	+	-	CCNA_R0096	small non-coding RNA	2039	0	0	4667	0	0	4	171058738	207139099	18	0	0	0	0	0	0	244	0	1	1
	14199	17021		+	glnD	CCNA_00013	protein-PII uridylyltransferase	350574	216791	334430	802467	753086	1945604	57	97692620511033	378583597721627	413	409010	33432	765965	547975	31	2824956576648	49821836989279	232	0.613306	1
	17494	17018		-	moaC	CCNA_00014	molybdenum cofactor biosynthesis protein C	3550	4849	0	8125	16844	0	3	2637622024	6239036276	17	0	0	0	0	0	0	244	0	1	1
	18042	17491		-	moaB	CCNA_00015	molybdenum cofactor biosynthesis protein B	15453	10075	5024	35372	34998	29227	10	308484673	71451968269	60	43097	0	80709	0	15	260241602481	106934920676	73	0.536121	1
	18495	18043		-	moaE	CCNA_00016	molybdopterin converting factor, large subunit	11592	10075	7375	26534	34998	42905	11	2463256093	79472090511	76	0	0	0	0	0	0	244	0	1	1
	18731	18492		-	moaD	CCNA_00017	molybdopterin converting factor, small subunit	5985	6679	17944	13699	23201	104392	23	188063198148	176202482904	196	150	0	280	0	0	325044	524217	0	0	0
	19784	18735		-	moaA	CCNA_00018	molybdenum cofactor biosynthesis protein A	57498	56791	48637	131613	197280	282954	28	515763961561	5535005679036	194	106712	9965	199842	163333	22	38772504562	2510422250663	172	0.513027	1
	19815	20447		+	-	CCNA_00019	molybdopterin-guanine dinucleotide biosynthesis protein A	0	0	0	0	0	0	0	0	356	0	5599	0	10485	0	1	1941459134	2161598718	8	1	1
	20668	20444		-	-	CCNA_00020	hypothetical protein	9885	141	5456	22626	489	31741	12	12432405613	22941127331	81	29761	3250	55734	53269	29	60134638	180977102800	242	0.669272	1
	20778	20665		-	-	CCNA_03911	hypothetical protein	21188	28	11244	48499	97	65413	51	74552274570	97911377723	333	28231	0	52869	0	50	94285874967	47412243708	231	0.56828	1
	23032	20840		-	-	CCNA_00021	putative aerobic-type carbon monoxide dehydrogenase, large subunit CoxL	136531	58410	63322	312520	202904	368386	21	661518953875	13855565033974	134	186885	51649	349985	846566	22	20376999844276	40831277855296	272	0.653174	1
	23559	23029		-	-	CCNA_00022	putative aerobic-type carbon monoxide dehydrogenase, small subunit CoxS	74638	45321	71602	170847	157435	416557	65	2475354250959	8714547815127	467	92043	8948	172371	146664	38	16706572515	1858399824358	300	0.575186	1
	23742	24074		+	-	CCNA_00023	putative periplasmic protein	24229	22348	7998	55460	77632	46529	29	12326010553	301132490389	179	38543	50	72180	819	23	193673513271	87382038321	109	0.585413	1
	24091	24981		+	-	CCNA_00024	uroporphyrin-III C-methyltransferase/Precorrin-2 dehydrogenase/Sirohydrochlorin ferrochelatase	13487	0	15900	30871	0	92501	5	164112822439	120387013159	46	0	2950	0	48352	0	76095446136	40424525989	27	0.597233	1
	26643	24991		-	-	CCNA_00025	major facilitator superfamily transporter	6202	1750	0	14196	6079	0	0	1763171075	4460559627	4	4800	0	8989	0	0	1341749137	1545962492	2	0.574896	1
	29403	26701		-	-	CCNA_00026	PAS-family sensor histidine kinase	17847	0	5000	40851	0	29088	1	23700581827	35985863504	8	0	2900	0	47533	0	73038617817	39366721985	8	0.502247	1
	30191	29502		-	-	CCNA_00027	2OG-Fe(II) oxygenase	1750	0	0	4005	0	0	0	118495141	133807717	1	17503	0	32778	0	5	29933802393	23374604715	23	4.11178e-08	8.56971e-07
30354			30271	-	-	CCNA_R0097	small non-coding RNA	0	0	0	0	0	0	0	0	356	0	0	0	0	0	0	0	244	0	1	1
	32658	30337		-	-	CCNA_00028	TonB-dependent receptor	20496	50	8504	46915	173	49473	2	46131468719	66673464427	13	21750	13149	40731	215522	3	1662684185616	1215271325109	55	0.518457	1
	32914	33546		+	-	CCNA_00029	lysine exporter protein	28025	13300	2236	64149	46201	13008	12	39245226641	120350713271	64	7848	3829	14697	62760	3	75008435253	98747542864	61	0.509305	1
	33595	34329		+	-	CCNA_00030	ribonuclease T2	8486	0	0	19424	0	0	2	5241641372	4200052340	8	4399	0	8238	0	1	1088269093	1281374106	5	0.581971	1
	34698	34312		-	vapC	CCNA_00031	toxin protein VapC	36603	59909	19579	83784	208111	113904	54	353763351262	1851908758629	349	29755	6183	55723	101344	18	66184992966	397777425788	202	0.590251	1
	34941	34699		-	vapB	CCNA_00032	antitoxin protein VapB	21715	9067	29100	49705	31496	169294	44	499065128940	594504325077	343	24661	52	46183	852	20	65179755150	38739878970	96	0.877407	1
	35667	35047		-	-	CCNA_03912	hypothetical protein	1250	0	2500	2861	0	14544	1	2129411574	3594205439	9	12807	0	23984	0	4	14144118375	13810404148	19	0.645299	1
	37962	35824		-	-	CCNA_00033	polyribonucleotide nucleotidyltransferase/polynucleotide adenylyltransferase	121092	14174	16313	277180	49237	94903	12	1567639925766	2050445088560	65	96934	7316	181531	119914	9	136158677485	1655741917498	70	0.477315	1
	38480	38211		-	-	CCNA_00034	SSU ribosomal protein S15P	230859	5475	3207	528438	19019	18657	160	13329237244779	4615624770873	698	50173	2047	93960	33551	39	129839835645	242932187043	236	0.669998	1
	39427	38495		-	-	CCNA_00035	tRNA pseudouridine synthase B	1536447	56944	19072	3516943	197811	110954	313	1235160740328540	498421388223177	1366	662383	4800	1240464	78675	145	156700156303300	50220214286647	706	0.628956	1
	39879	39430		-	-	CCNA_00036	ribosome-binding factor A	18221	0	0	41708	0	0	7	32808091735	14776969915	30	0	50	0	819	0	4272146	8614684	0	1.98668e-107	1.05397e-105
	40768	39980		-	-	CCNA_00037	esterase lipase family protein	14618	0	1655	33460	0	9628	3	14682197813	15510044731	18	13750	0	25750	0	3	16773719078	15690919597	16	0.471875	1
	41403	40828		-	-	CCNA_00038	hypothetical protein	74774	43101	16658	171158	149723	96910	42	99382279147	2003178728078	241	49999	100	93634	1639	17	356285495343	142886246936	82	0.655203	1
	41921	41403		-	-	CCNA_00039	conserved hypothetical protein	221887	45944	17705	507901	159599	103001	99	6581488968043	9538474541376	494	54221	100	101541	1639	21	434252216398	164618231731	99	0.0523096	0.459537
	42511	41960		-	-	CCNA_00040	YcxB-like membrane protein	7508	5950	1600	17185	20669	9308	4	1086112803	17864909432	28	7007	0	13122	0	2	3326320446	3784183023	11	0.661434	1
	45614	42585		-	-	CCNA_00041	protein translation initiation factor 2 IF-2	634316	136287	14804	1451955	473432	86124	47	108156837573180	98164886789607	221	1146628	20646	2147323	338403	78	453492877392424	233755620386317	410	0.640184	1
46002			45805	-	-	CCNA_R0098	small non-coding RNA	144162	5338	2150	329988	18543	12507	138	4185674094578	1352169249650	607	7099	4900	13294	80314	12	166592183935	138638683725	236	0.644389	1
	46543	45893		-	-	CCNA_00042	RNA-binding protein, YlxR family	144634	14076	6063	331068	48897	35272	45	3423087107468	1970028277383	212	6824	5770	12779	94574	3	268725092755	176239284869	82	0.641062	1
	48268	46622		-	nusA	CCNA_00043	N utilization substance protein A NusA	31479	14933	4115	72055	51874	23939	5	33076145317	197726179413	29	49398	3500	92509	57367	6	35379162155	352937733454	45	0.58712	1
	48846	48271		-	-	CCNA_00044	ribosome maturation protein RimP	87322	0	8754	199880	0	50927	30	1095382803409	595975430000	145	37914	150	71002	2458	13	175829067463	88541073368	63	0.633682	1
	49105	49638		+	-	CCNA_00045	inorganic pyrophosphatase	24619	0	24	56353	0	139	8	67355258879	24143394451	35	56482	0	105775	0	21	498061860858	171821060861	99	0.663201	1
	50031	49645		-	-	CCNA_00046	conserved hypothetical protein	6400	0	4252	14649	0	24736	4	6720386513	13608708629	33	0	0	0	0	0	0	244	0	1	1
	50812	50132		-	-	CCNA_00047	tRNA m7-G46 methyltransferase	2820	0	0	6455	0	0	0	372567966	463427092	3	50	0	93	0	0	23077	-5668	0	1	1
	52125	50902		-	metK	CCNA_00048	S-adenosylmethionine synthetase	10118	5700	2203	23160	19800	12816	2	858377942	23614183958	15	34950	1499	65451	24569	6	50867585828	129732335991	36	0.648269	1
	52679	52245		-	hipB	CCNA_00049	HTH transcriptional regulator	3249	0	2600	7436	0	15125	2	2036317678	5202454943	17	100	0	187	0	0	123366	250640	0	0	0
	54299	52707		-	-	CCNA_00050	apolipoprotein N-acyltransferase	3850	0	11350	8812	0	66030	1	85267971272	41059732407	15	7849	4649	14699	76200	1	135544291287	131891532140	28	0.6072	1
	55222	54296		-	corC	CCNA_00051	magnesium and cobalt efflux protein CorC	9181	0	0	21015	0	0	1	6331768686	4690703217	7	13299	0	24905	0	2	15482878887	14785335658	13	0.614442	1
	55686	55231		-	-	CCNA_00052	metal-dependent hydrolase/metalloproteinase	13027	0	2500	29818	0	14544	6	10384379327	16215650661	32	52	98	97	1606	0	18519037	55607458	1	1.85308e-16	5.56606e-15
	56668	55724		-	phoH	CCNA_00053	phosphate starvation-inducible protein PhoH	3159	0	0	7230	0	0	0	489087324	585437606	2	0	0	0	0	0	0	244	0	1	1
	58011	56665		-	-	CCNA_00054	tRNA 2-methylthioadenosine synthase	32998	6898	4900	75532	23962	28506	6	49380456087	133612240003	31	46701	0	87458	0	7	315560695878	123461265411	32	0.491677	1
	58608	58201		-	-	CCNA_00055	ferric uptake regulation protein	52217	5200	5620	119525	18063	32695	28	236556975798	270342318243	139	81519	1837	152663	30109	41	709169391426	588307008293	223	0.59638	1
	59106	58654		-	-	CCNA_00056	ribosomal-protein-S18-alanine acetyltransferase	4349	5850	0	9954	20321	0	4	4136832590	8773289999	22	2624	0	4914	0	1	314925893	481003637	5	0.860545	1
	59750	59115		-	-	CCNA_00057	glycoprotease family protein	16549	8902	3250	37880	30923	18907	8	3607956840	54631610580	45	16518	3700	30933	60645	6	23648333019	133575788833	71	0.581164	1
	60386	59754		-	-	CCNA_00058	conserved hypothetical protein	43923	6550	4408	100540	22753	25644	15	140165257867	201126871869	78	24967	50	46756	819	8	67290586869	39421067960	37	0.627235	1
	61121	60534		-	-	CCNA_00059	oxygen-insensitive NADH nitroreductase	47673	7149	2300	109123	24834	13380	17	210917297185	196007211939	83	10350	0	19382	0	3	8482436542	9026356190	16	0.414744	1
	61763	61191		-	-	CCNA_00060	mitochondrial-type Fe-S cluster assembly protein NFU	76368	38501	28498	174807	133744	165792	45	25222384366	2919885514952	275	30698	8650	57489	141780	13	288827738744	728089300916	173	0.581083	1
	61885	63153		+	-	CCNA_00061	cytochrome p450	131272	5147	5300	300482	17879	30833	20	3068820947387	1232791597759	91	139430	2051	261114	33617	22	3129720991734	1586500212567	116	0.552805	1
	64361	63327		-	trpS	CCNA_00062	tryptophanyl-tRNA synthetase	7051	0	2350	16139	0	13671	1	2844847969	8533535085	9	15701	0	29403	0	3	23062370836	19661253707	14	0.577686	1
	64487	64440		-	-	CCNA_03913	hypothetical protein	5133	0	0	11749	0	0	19	1568399371	1657706100	81	972	0	1820	0	4	29035902	65027112	18	0.575936	1
	66091	64529		-	mviN	CCNA_00063	MviN-family integral membrane protein	13025	0	2350	29814	0	13671	1	10407094600	15728302460	9	800	0	1498	0	0	18196688	36072511	0	1.56568e-24	1
	68127	66331		-	-	CCNA_00064	methyl-accepting chemotaxis protein	38475	0	5350	88069	0	31124	4	144486187443	109659028423	22	11399	0	21347	0	1	10694794562	11043108267	5	0.715449	1
	68196	68179		-	-	CCNA_03914	hypothetical protein	0	0	0	0	0	0	0	0	356	0	0	0	0	0	0	0	244	0	1	1
	69062	68289		-	-	CCNA_00065	S-adenosylmethionine-dependent methyltransferase	1951	0	0	4465	0	0	0	153824665	186027660	1	5700	7000	10674	114735	3	478911420117	235206073959	81	3.97566e-109	2.13692e-107
	69488	69120		-	-	CCNA_00066	Rieske (2Fe-2S) domain protein	3350	0	1899	7668	0	11047	2	1015929881	3986022167	16	0	0	0	0	0	0	244	0	1	1
	69774	69493		-	-	CCNA_00067	YciI-like protein	857	0	0	1961	0	0	0	21350152	24946194	2	1	40	1	655	0	2489720	3216236	1	0.717992	1
	70804	69794		-	gpsA	CCNA_00068	NAD(P)H-dependent glycerol-3-phosphate dehydrogenase	27100	14118	13540	62032	49042	78771	9	10373277983	335690273796	62	100255	36825	187750	603589	27	13310198363638	15317843936034	391	0.0271852	0.264521
	71904	70801		-	-	CCNA_00069	O-sialoglycoprotein endopeptidase	14074	2220	15425	32215	7711	89737	5	125436970029	138743961202	39	13639	7504	25542	122996	3	409150618344	345010280977	67	0.604245	1
	71977	72945		+	-	CCNA_00070	porphobilinogen deaminase	5100	0	4550	11673	0	26470	1	7844252262	12996306893	13	0	0	0	0	0	0	244	0	1	1
	72950	73636		+	-	CCNA_00071	uroporphyrinogen-III synthase	7624	0	0	17451	0	0	2	4053435425	3608461588	8	0	0	0	0	0	0	244	0	1	1
	73680	74576		+	-	CCNA_00072	conserved hypothetical protein	1450	0	0	3319	0	0	0	75486945	81958728	1	0	0	0	0	0	0	244	0	1	1
	74573	76108		+	-	CCNA_00073	HemY domain membrane protein	11098	5700	3198	25403	19800	18604	2	349706381	30098662008	13	13041	2700	24422	44255	2	8963883324	77305362369	22	0.587946	1
76150			76225	+	-	CCNA_R0001	tRNA-Thr	38976	0	2503	89216	0	14561	99	170603479826	78332477563	455	4789	0	8968	0	12	1334238426	1538378136	59	0.00225528	0.0284346
	78678	76477		-	-	CCNA_00074	multifunctional fatty acid oxidation complex subunit alpha FadJ	115450	18993	0	264266	65977	0	11	2149068779279	1056484312955	49	70276	6399	131607	104884	7	18335320844	1033503408811	53	0.481363	1
	79908	78703		-	-	CCNA_00075	3-ketoacyl-CoA thiolase	42701	6499	455	97743	22576	2647	7	190837001458	119290491000	33	71520	1200	133937	19668	12	599504199250	375745961996	63	0.615656	1
	80358	79975		-	-	CCNA_00076	hypothetical protein	17125	0	0	39199	0	0	8	28269261618	13516618154	34	6850	0	12828	0	3	3150253394	3479422383	16	0.634465	1
	81530	80355		-	-	CCNA_00077	acyl-CoA dehydrogenase, long-chain specific	76346	6400	0	174756	22232	0	12	887062505822	361334555412	55	30099	2145	56367	35158	5	10529614400	133441119807	38	0.561468	1
	83326	81533		-	-	CCNA_00078	acyl-CoA dehydrogenase	301092	17676	4143	689202	61402	24102	32	23661268262505	9678733075256	143	94667	0	177285	0	10	1720191452308	543451541681	49	0.660563	1
	83893	83414		-	-	CCNA_00079	MerR-family transcriptional regulator	693606	6750	7692	1587671	23448	44749	267	193519007745428	66447759241144	1149	254775	2494	477124	40878	108	14932052359339	5914201323286	539	0.635382	1
	84087	84728		+	-	CCNA_00080	LexA-related transcriptional repressor	108277	0	5935	247847	0	34527	32	2027370304075	753113583759	146	36554	7216	68455	118275	13	81758504875	620632271692	145	0.497022	1
	84972	84763		-	-	CCNA_00081	hypothetical protein	7364268	217276	66418	16856886	754771	386398	6608	5.44538e+16	2.05378e+16	28568	6100748	45279	11425049	742157	5938	3.21823e+16	9541424246680530	28969	0.492324	1
	86880	85222		-	lysS	CCNA_00082	class 1 lysyl-tRNA synthetase	43696	0	50	100020	0	290	4	266780505676	72581290427	20	5850	0	10955	0	0	2156918453	2375491650	3	0.0265365	0.259956
	88683	87043		-	-	CCNA_00083	phosphoglucomutase/phosphomannomutase	54562	1850	6670	124892	6426	38803	6	308101216446	269819642546	34	35598	14549	66665	238469	6	1595305474808	1695510854157	92	0.674231	1
	89053	90642		+	purH	CCNA_00084	phosphoribosylaminoimidazolecarboxamide formyltransferase/IMP cyclohydrolase	30408	0	100	69604	0	581	3	111031126573	36228624818	14	32000	0	59927	0	4	127367344519	59668425121	18	0.546415	1
	90655	91413		+	-	CCNA_00085	dienelactone hydrolase-related protein	1700	0	2851	3891	0	16586	1	2829374332	4522601855	8	0	0	0	0	0	0	244	0	1	1
	96290	91467		-	gdhZ	CCNA_00086	NAD-specific glutamate dehydrogenase GdhZ	410353	114349	59633	939302	397224	346925	21	17359468253925	68749930917803	116	414731	33049	776678	541698	18	3382502793365	50161673891228	136	0.455894	1
96584			96456	-	-	CCNA_R0002	small non-coding RNA	448923	257829	106806	1027589	895643	621362	1144	5747451108723	173735084736821	6575	162008	26398	303397	432683	296	806283184995	13502324948195	2853	0.653943	1
	97737	96628		-	-	CCNA_00087	conserved membrane spanning protein	19284	0	2000	44141	0	11635	3	29013978807	23614183958	16	9650	2299	18071	37682	2	8724958738	52267454035	25	0.575667	1
	97841	99385		+	-	CCNA_00088	HerA helicase-related ATPase	14706	5750	5349	33662	19974	31118	3	1858519490	51279994602	18	16501	7343	30901	120357	3	333139972073	361210284536	48	0.653982	1
	101895	99466		-	-	CCNA_00089	MHYT/PAS-family GGDEF/EAL protein	21549	0	4350	49325	0	25306	1	34754199549	40845542520	10	25493	0	47741	0	2	73808033332	39631504013	9	0.509263	1
	102943	101960		-	-	CCNA_00090	UDP-glucose 4-epimerase	8098	0	2349	18536	0	13665	1	3618010989	9803477997	10	11050	0	20693	0	2	9925223725	10375334266	10	0.489326	1
	104042	103149		-	-	CCNA_00091	transporter, drug/metabolite exporter family	8286	0	809	18966	0	4706	1	3863549908	5669983288	8	3753	0	7028	0	0	743293289	912222440	3	0.639625	1
	104929	104039		-	-	CCNA_00092	short chain dehydrogenase	31515	11650	30142	72138	40469	175356	14	432689007865	783242052722	107	3753	0	7028	0	0	743293289	912222440	3	9.24444e-47	3.97511e-45
	105237	105028		-	-	CCNA_00093	hypothetical protein	4710	0	0	10781	0	0	4	1275957514	1412825822	17	0	0	0	0	0	0	244	0	1	1
	106230	105310		-	hfsJ	CCNA_00094	WecG/TagA-family glycosyltransferase HfsJ	1650	0	0	3776	0	0	0	102880089	114522108	1	0	0	0	0	0	0	244	0	1	1
	107332	106334		-	-	CCNA_00095	quinone oxidoreductase	7158	0	8550	16384	0	49741	2	37109681822	32266116464	22	6620	0	12397	0	1	2902176702	3150478973	6	0.702365	1
	107402	108280		+	-	CCNA_00096	L-asparaginase	12251	0	5299	28042	0	30827	3	14328408386	25925352209	22	23400	0	43821	0	5	60089900797	35061672311	24	0.519115	1
	108334	108792		+	-	CCNA_00097	conserved hypothetical protein	4549	0	0	10412	0	0	1	1173644280	1317984962	7	1351	0	2530	0	0	64010800	140976819	2	0.675217	1
	109233	108943		-	-	CCNA_00098	hypothetical protein	920	0	2839	2105	0	16516	2	3083090625	3958046776	21	0	0	0	0	0	0	244	0	1	1
	110969	109239		-	fzlC	CCNA_00099	FtsZ-binding protein FzlC	16796	1196	9376	38446	4154	54546	2	38490907210	67570878973	18	18551	0	34741	0	2	34417994602	25438916063	10	0.623615	1
	111638	110979		-	-	CCNA_00100	Ribulose-5-phosphate 3-epimerase	20234	4356	0	46315	15131	0	6	31312846499	27981844364	31	1599	0	2994	0	0	95888895	191738896	2	5.2228e-09	1.15952e-07
	113034	111745		-	rsmB	CCNA_00101	16S rRNA m5C methyltransferase RsmB	22549	0	3398	51614	0	19768	3	39591037220	37460493254	18	6642	0	12438	0	1	2925265782	3174033312	4	0.835258	1
	113151	113375		+	-	CCNA_00102	conserved hypothetical protein	39834	18296	10308	91180	63556	59968	55	14384946461	433417539750	318	0	0	0	0	0	0	244	0	1	1
	113463	115160		+	-	CCNA_00103	gamma-glutamyltranspeptidase	17047	36699	21702	39020	127484	126255	8	196112507517	809251557406	57	0	0	0	0	0	0	244	0	1	1
	115990	115289		-	-	CCNA_00104	orotidine 5'-phosphate decarboxylase	27942	50	3075	63959	173	17889	8	69520307344	48411123832	38	13774	0	25794	0	3	16842589910	15738664122	18	0.649114	1
	116088	116786		+	-	CCNA_00105	MarC family integral membrane protein	1084	0	0	2481	0	0	0	37545572	40910566	1	0	0	0	0	0	0	244	0	1	1
	116834	118099		+	-	CCNA_00106	2-polyprenyl-6-methoxyphenol hydroxylase	7349	6850	4699	16821	23795	27337	2	887465179	34004316550	17	37903	1900	70982	31142	6	47811282846	161698630755	40	0.638068	1
	118457	118260		-	-	CCNA_00107	Trm112p-like protein	16869	11049	2058	38613	38381	11972	27	11072796958	56152100969	149	50799	4100	95132	67202	56	20386104724	432837413725	409	0.654321	1
	119144	118467		-	-	CCNA_00108	lon endopeptidase-related protein	36863	40445	13895	84379	140497	80836	24	72302956136	881425391199	150	3596	5398	6734	88477	2	268315263690	142725400706	70	0.622895	1
	120059	119160		-	-	CCNA_00109	thioredoxin	91745	35966	25919	210005	124938	150788	30	136464371863	3120089904919	179	64586	2902	120952	47565	15	207133301764	476140150650	93	0.608741	1
	120675	120169		-	-	CCNA_00110	DNA-binding protein	2000	5399	0	4578	18754	0	2	3772040438	5530242787	15	0	0	0	0	0	0	244	0	1	1
	120752	121498		+	-	CCNA_00111	conserved hypothetical protein	6835	0	8500	15645	0	49450	3	36850570702	31307801855	29	21350	750	39982	12293	6	19966477679	46442626860	34	0.534872	1
	121503	121892		+	-	CCNA_00112	glyoxalase family protein	0	0	0	0	0	0	0	0	356	0	0	0	0	0	0	0	244	0	1	1
	121972	122544		+	-	CCNA_00113	hypothetical protein	15600	0	0	35708	0	0	4	22599131945	11733202738	20	2740	3643	5131	59711	2	101775789596	69174865600	56	0.675288	1
	122547	122852		+	-	CCNA_00114	MarR/EmrR-family transcriptional regulator	2350	0	0	5379	0	0	1	240512803	299192966	5	0	0	0	0	0	0	244	0	1	1
	122939	126268		+	-	CCNA_00115	TolB protein	13018	7800	8946	29798	27095	52044	1	8461283976	87687354007	10	14219	0	26628	0	0	18179273399	16633965385	3	0.683675	1
124282			124027	-	-	CCNA_R0099	small non-coding RNA	11900	0	0	27239	0	0	8	11800849697	7271775338	35	7550	0	14139	0	5	3978953598	4825173109	27	0.553291	1
	127753	126407		-	-	CCNA_00116	phosphoglucosamine mutase	16590	12117	9800	37974	42091	57013	5	3997792460	162517640719	33	900	1349	1685	22111	0	9620640609	13608122361	8	0.71576	1
	127915	129735		+	-	CCNA_00117	glucosamine-fructose-6-phosphate aminotransferase, isomerizing	21557	2950	3050	49344	10247	17743	2	22953355937	43620790471	14	19806	3749	37091	61448	2	14677805106	151646778669	27	0.614744	1
	129746	131989		+	-	CCNA_00118	porphyrin biosynthesis protein	71139	0	8950	162837	0	52068	6	642443932638	434280481487	31	62946	2350	117880	38518	5	249939130493	393536310917	34	0.475252	1
	131977	132438		+	-	CCNA_00119	conserved hypothetical protein	1248	0	1800	2856	0	10471	1	912435159	2152025323	9	5720	0	10712	0	2	2043870422	2264181793	11	0.545009	1
	132435	132953		+	-	CCNA_00120	putative acetyltransferase	480	0	0	1098	0	0	0	5307623	7721854	0	2002	0	3749	0	0	164498180	293775792	3	0.0357367	1
	133408	132950		-	-	CCNA_00121	hypothetical protein	30001	3000	400	68672	10421	2327	13	87246661572	47797928622	59	24281	232	45471	3802	10	53249482678	41711996932	53	0.519883	1
	133827	133417		-	-	CCNA_00122	conserved hypothetical protein	186406	23498	100	426685	81627	581	92	7097750412236	3529647160138	412	108151	3485	202537	57121	55	1069136782660	1247970014849	315	0.543848	1
	133900	134682		+	-	CCNA_00123	3-hydroxyacyl CoA dehydrogenase	11350	0	5202	25980	0	30263	3	13005753576	23955518865	23	3499	0	6552	0	0	628147069	775485843	4	0.0320661	0.306768
	135413	134826		-	-	CCNA_00124	conserved hypothetical protein	2304634	739153	489978	5275331	2567662	2850532	1090	652368620047206	5890029725855460	6062	2968082	225718	5558414	3699688	1102	484039610308082	6012114049666250	7872	0.564886	1
	136177	135509		-	-	CCNA_00125	amino acid efflux permease	4253	0	0	9735	0	0	1	998759189	1142007026	4	16783	2650	31430	43435	5	2686786783	92054221084	55	2.75356e-05	0.000464805
	136591	136184		-	-	CCNA_00126	glutathione S-transferase	4572	0	0	10465	0	0	2	1188033393	1334814884	8	0	0	0	0	0	0	244	0	1	1
	136811	137011		+	-	CCNA_00127	KTSC domain protein	17140	18039	16226	39233	62663	94397	46	45858885123	358766223481	325	33482	13634	62702	223471	47	1360346520825	1501772318708	711	0.646734	1
	138472	137246		-	-	CCNA_00128	argininosuccinate synthase	29600	100	140	67754	347	814	4	102978967041	34959507550	18	48716	50	91231	819	8	341748477513	134746914009	37	0.621176	1
	138917	138555		-	-	CCNA_00129	hypothetical protein	2900	10698	0	6638	37162	0	6	20559094171	15901500730	40	0	0	0	0	0	0	244	0	1	1
	140918	138921		-	-	CCNA_00130	Kup system potassium uptake protein	32828	50	12	75143	173	69	2	134248046865	41618351317	12	29236	5	54751	81	2	102179031646	50686557550	13	0.516016	1
	141119	141541		+	-	CCNA_00131	Rrf2 family protein	30339	1050	2750	69446	3647	15998	14	80346064163	56301015521	70	50812	5469	95157	89641	26	415587257	604635365761	218	0.691901	1
	141633	142433		+	hetN	CCNA_00132	ketoacyl reductase hetN	14939	4250	0	34195	14763	0	4	14530043632	18978427620	20	25297	2600	47374	42615	7	291609534	129654270774	56	0.664693	1
	142680	143894		+	-	CCNA_00133	radical SAM family enzyme	528713	11226	1338	1210229	38996	7784	80	101453046042303	35106361593237	344	155194	3349	290636	54892	26	3408957295730	2226637630291	142	0.645288	1
	143989	144417		+	-	CCNA_00134	surface protein	10742	8513	9098	24588	29572	52929	11	10756019746	84258429936	83	0	0	0	0	0	0	244	0	1	1
	144443	145276		+	-	CCNA_00135	trypsin-like peptidase	144421	26650	26839	330581	92576	156140	43	1650952214848	4876917296119	231	41945	50	78551	819	10	237795496797	103599895654	47	0.0694877	0.5793
	146952	145273		-	-	CCNA_00136	AmpG protein	5550	0	0	12704	0	0	0	1891958757	1932586750	2	0	0	0	0	0	0	244	0	1	1
	148530	146986		-	shkA	CCNA_00137	hybrid two-component histidine kinase/receiver protein ShkA	87694	19602	10300	200732	68093	59922	13	568695576748	1044122497407	70	45652	0	85493	0	5	298811523693	118657693583	27	0.646298	1
	148752	150944		+	-	CCNA_00138	TonB-dependent receptor	7700	0	2300	17625	0	13380	0	3257854987	9161295708	4	0	0	0	0	0	0	244	0	1	1
	152600	150993		-	chlI	CCNA_00139	magnesium chelatase subunit ChlI-like ATPase	26147	26652	2600	59850	92583	15125	6	103617803968	261341181685	34	13650	5700	25562	93427	2	171677766100	213265361133	36	0.478483	1
	153662	152709		-	-	CCNA_00140	glutathione synthetase	30382	15200	13550	69544	52801	78829	11	7738506115	377297939295	70	36697	16990	68723	278478	11	2575571306479	2252527339881	181	0.668065	1
	154533	153718		-	-	CCNA_00141	tetratricopeptide repeat family protein	7926	16050	7690	18142	55754	44737	7	19377176513	108263576552	48	28375	1700	53138	27864	7	16039157792	107668805395	49	0.493106	1
	154912	154535		-	-	CCNA_00142	endonuclease	15375	0	105	35193	0	610	7	21379450948	11785873708	31	18847	0	35295	0	10	35749967603	26012260548	46	0.57704	1
	155784	154912		-	-	CCNA_00143	ribosomal RNA small subunit methyltransferase I	30613	1960	0	70073	6808	0	6	102077951388	43147737349	29	14720	0	27566	0	3	19754271099	17645011062	15	0.626696	1
	156973	155819		-	-	CCNA_00144	oxygen-independent coproporphyrinogen-III oxidase	6327	0	0	14482	0	0	0	2590854328	2511931911	4	0	0	0	0	0	0	244	0	1	1
	157568	156966		-	-	CCNA_00145	xanthosine triphosphate pyrophosphatase	4728	0	2051	10822	0	11932	2	1464294867	5285859719	12	6204	0	11618	0	2	2483586544	2723365610	9	0.55058	1
	157593	158186		+	-	CCNA_00146	glutathione S-transferase	6099	0	0	13960	0	0	1	2372354005	2355472443	7	28144	1750	52706	28683	10	14199380110	108619924860	68	0.00309259	0.0379376
	158354	158470		+	-	CCNA_00147	hypothetical protein	65001	35370	39625	148787	122867	230525	217	250704594514	3410138885323	1430	43630	3882	81707	63628	82	7177654974	326674410590	621	0.628311	1
	158546	159079		+	-	CCNA_00148	conserved hypothetical protein	373571	70703	99175	855107	245607	576967	184	14547478292076	68274384702777	1047	99212	2500	185797	40976	38	1058667804990	953551637967	212	0.0848828	0.682571
	159096	159323		+	-	CCNA_00149	Cro/CI-family transcriptional regulator	107474	18293	70	246009	63546	407	100	1792900807651	907411931673	453	278636	28072	521809	460121	272	136535524022	25161616618401	2153	0.425092	1
	160297	159320		-	-	CCNA_00150	PDZ domain family protein	467608	181837	161916	1070359	631663	941974	150	7043213077163	188741605815297	901	231862	19607	434214	321373	52	581680665076	14177334038439	386	0.655583	1
	161180	160464		-	-	CCNA_00151	ribonuclease PH	9764	0	3049	22349	0	17738	3	5922113752	13955933742	18	20298	2934	38012	48090	6	1765478588	120148909927	60	0.68681	1
	161320	162396		+	-	CCNA_00152	winged helix-turn-helix transcription repressor HrcA	64184	75699	98943	146917	262962	575618	40	6761037339018	19024454344645	305	68633	7797	128531	127798	14	3273516	1216002300634	119	0.652747	1
	162409	163035		+	grpE	CCNA_00153	adenine nucleotide exchange factor GrpE	89174	11797	29803	204120	40980	173384	37	709768740503	2012416183553	222	66520	13871	124573	227356	26	464916650518	2327370599990	280	0.554377	1
	163235	162975		-	-	CCNA_00154	conserved hypothetical membrane protein	1900	0	1400	4349	0	8144	2	461680882	1863407287	15	5401	0	10114	0	4	1780652129	1996873243	19	0.546282	1
	163413	164531		+	-	CCNA_00155	DNA polymerase III, beta chain	26384	0	6950	60393	0	40432	5	59085731194	73397182222	30	0	0	0	0	0	0	244	0	1	1
	164664	164951		+	-	CCNA_00156	ArsR-family transcriptional regulator	0	0	0	0	0	0	0	0	356	0	0	3899	0	63907	2	148621020610	67269258100	110	1	1
	165022	165393		+	-	CCNA_00157	glyoxalase family protein	0	0	0	0	0	0	0	0	356	0	0	0	0	0	0	0	244	0	1	1
165492			165575	+	-	CCNA_R0100	small non-coding RNA	42999	52020	38545	98425	180706	224242	288	341288220241	3431546184528	1997	8047	50	15069	819	19	4054335458	6269971680	94	1.06991e-19	3.41451e-18
	165621	166784		+	recF	CCNA_00158	DNA replication and repair protein recF	73066	3851	16611	167248	13377	96637	14	534412842074	725925156871	79	16124	0	30195	0	2	24581483392	20534378962	12	0.0389558	0.361925
	166781	169246		+	gyrB	CCNA_00159	DNA gyrase subunit B	77883	29999	450	178275	104210	2617	7	739571293088	767755519593	38	88958	5200	166594	85231	7	265331427467	1172874458671	51	0.55922	1
	169387	170526		+	-	CCNA_00160	methyl-accepting chemotaxis protein	4200	0	900	9613	0	5235	0	688284996	2637696689	4	3651	0	6837	0	0	695731085	850023970	2	0.564567	1
	170951	171577		+	-	CCNA_00161	hypothetical protein	428432	22347	18999	980685	77628	110529	135	50413477017211	29633804752857	621	66391	12750	124332	208982	25	291788865252	2048392580415	265	0.640293	1
	171649	172917		+	-	CCNA_00162	conserved hypothetical protein	569857	56699	11352	1304408	196960	66042	91	99663039692682	58756743996009	411	102749	16951	192421	277839	19	298182781538	4605968142435	185	0.639284	1
	172964	175183		+	-	CCNA_00163	exopolysaccharide transport family protein	107078	55892	57046	245102	194157	331875	17	419500378316	9559621091072	115	286765	125300	537033	2053761	37	297127258195274	257617413028258	583	0.764895	1
	175173	177098		+	-	CCNA_00164	O-antigen polymerase	6090	12699	8150	13940	44113	47414	2	17307654660	81305163603	18	3400	3614	6367	59236	0	94285874967	70727409295	17	0.512968	1
	177745	177092		-	pssY	CCNA_00165	polyisoprenylphosphate hexose-1-phosphotransferase pssY	77479	1296	3745	177350	4502	21787	22	888583195975	387086625192	103	17422	0	32626	0	5	29601737400	23213890878	24	0.998146	1
	177944	178090		+	-	CCNA_03915	hypothetical protein	41493	0	100	94977	0	581	51	234725656936	65158050017	216	35764	0	66976	0	49	166329813738	73607419091	227	0.508775	1
	179070	178252		-	-	CCNA_00166	putative transglutaminase-like cysteine proteinase	4614	0	2850	10561	0	16580	1	2614611934	7225249935	11	0	0	0	0	0	0	244	0	1	1
	179311	180120		+	-	CCNA_00167	metallophosphatase family protein	209180	398329	361079	478815	1383711	2100639	216	152709206342573	550817543139610	1630	43556	1900	81568	31142	11	84165644222	192371610528	69	3.53913e-40	1.46034e-38
	180205	180801		+	-	CCNA_00168	polysaccharide export protein	2535736	71885	68618	5804326	249713	399197	813	3988357424882940	1819687241896530	3603	1171880	9296	2194614	152368	401	606768931004732	205853300826157	1965	0.625121	1
	181379	182917		+	-	CCNA_00169	hypothetical protein	580700	21886	13373	1329228	76027	77799	72	115336793925751	51492979845491	321	573663	114338	1074315	1874086	90	63956040809871	383049518770926	957	0.724609	1
	182997	185663		+	-	CCNA_00170	TonB-dependent receptor	85709	50	300	196188	173	1745	5	1332865194463	365547030320	24	160786	9464	301108	155122	12	1079222291240	4286259664574	85	0.694899	1
	185853	186290		+	-	CCNA_00171	type II secretion pathway protein C	10397	0	0	23798	0	0	4	8533979605	5722874847	18	3900	424	7303	6949	2	570652	5008040063	16	0.523861	1
	186287	188350		+	pulD	CCNA_00172	type II secretion pathway protein D	10449	0	4499	23917	0	26173	1	9717327914	19693519153	8	8550	0	16011	0	0	5362512348	6344412232	3	0.647502	1
	188347	189822		+	pulE	CCNA_00173	type II secretion pathway protein E	12024	0	200	27523	0	1163	1	11513161395	7970292672	6	50	1700	93	27864	0	20108684034	18074094161	9	0.575081	1
	189809	191020		+	pulF	CCNA_00174	type II secretion pathway protein F	15728	36597	20099	36001	127130	116929	10	188826576170	740728158374	77	0	0	0	0	0	0	244	0	1	1
	191032	191484		+	-	CCNA_00175	type II secretion pathway protein G	5142	0	0	11770	0	0	2	1575135796	1664595821	8	2500	1400	4681	22947	1	7357127680	17711958295	30	0.716624	1
	191399	191956		+	-	CCNA_00176	type II secretion pathway protein H	595	0	2401	1361	0	13968	0	2127173937	2797749159	9	0	0	0	0	0	0	244	0	1	1
	191925	192308		+	-	CCNA_00177	type II secretion pathway protein I	1500	0	0	3433	0	0	0	81859969	90193870	2	0	0	0	0	0	0	244	0	1	1
	192305	192895		+	-	CCNA_00178	type II secretion pathway protein J	6399	0	0	14647	0	0	1	2662265275	2566933460	8	9650	50	18071	819	3	6414734469	8532990723	15	0.633859	1
	192892	193866		+	-	CCNA_00179	type II secretion pathway protein K	7990	0	0	18289	0	0	1	4536390126	3858117028	6	0	0	0	0	0	0	244	0	1	1
	193848	194954		+	-	CCNA_00180	type II secretion pathway protein L	3913	6100	0	8956	21190	0	1	4617245964	8708616602	9	0	0	0	0	0	0	244	0	1	1
	194951	195427		+	-	CCNA_00181	type II secretion pathway protein M	0	0	0	0	0	0	0	0	356	0	0	0	0	0	0	0	244	0	1	1
	195424	196140		+	-	CCNA_00182	type II secretion pathway protein N	5650	300	1850	12932	1042	10762	1	1329490668	6138075904	11	0	0	0	0	0	0	244	0	1	1
	197011	196250		-	pulO	CCNA_00183	type II secretory pathway, prepilin signal peptidase	9750	5350	50	22317	18584	290	3	5908664089	14511346732	18	9950	0	18633	0	2	7716896726	8264807841	12	0.582465	1
	197267	197070		-	-	CCNA_00184	hypothetical protein	2350	5400	0	5379	18758	0	7	3663129287	5876025489	40	0	0	0	0	0	0	244	0	1	1
	199810	197285		-	-	CCNA_00185	TonB-dependent receptor	34722	6150	2600	79479	21363	15125	3	83232763202	102217235743	15	8449	1700	15822	27864	0	2706703597	34914625197	8	0.607158	1
200201			200125	-	-	CCNA_R0003	tRNA-Arg	33174	3886	15161	75935	13499	88201	123	111306674929	294575077839	768	2660	1500	4981	24586	10	8718553532	19842291975	191	0.797933	1
	201602	200286		-	-	CCNA_00186	guanine-hypoxanthine permease	2672	104	2961	6116	361	17226	0	2751196339	5683195214	5	6549	100	12264	1639	1	2004257247	4591653527	5	0.527312	1
	202681	201599		-	-	CCNA_00187	NUP-family purine nucleoside permease	7718	5341	17102	17666	18553	99493	5	163225570193	158114581414	41	4347	0	8140	0	0	1057456660	1246899547	3	1.2529e-06	2.43719e-05
	203725	202763		-	-	CCNA_00188	ABC transporter ATP-binding protein	26848	11650	32550	61455	40469	189365	13	595818106138	801298421950	100	25149	0	47097	0	5	71441043835	38817405686	24	0.565884	1
	203869	204135		+	-	CCNA_00189	zinc-finger domain protein	405	0	0	927	0	0	0	3535459	5213488	1	0	50	0	819	0	4272146	8614684	1	0.551305	1
	204137	204571		+	-	CCNA_00190	acyl-CoA hydrolase	7249	0	0	16593	0	0	3	3591486894	3280805707	12	0	0	0	0	0	0	244	0	1	1
	204697	205173		+	-	CCNA_00191	N-acetylglutamate synthase domain protein	6169	15557	5594	14120	54041	32544	10	20962339042	73207261537	70	3237	3250	6062	53269	2	71842158143	58587928891	62	0.524295	1
	206793	205174		-	-	CCNA_00192	long-chain-fatty-acid--CoA ligase	5734	31	2298	13125	107	13369	0	2052192662	6974354960	5	12716	1951	23813	31978	1	1065267964	52338441935	17	0.695169	1
	208041	206989		-	leuB	CCNA_00193	3-isopropylmalate dehydrogenase	0	0	1750	0	0	10180	0	1111857568	1249756705	3	14299	0	26778	0	2	18426019843	16792964339	12	0.726758	1
	208345	208043		-	-	CCNA_00194	Antibiotic biosynthesis monooxygenase family protein	0	0	0	0	0	0	0	0	356	0	0	0	0	0	0	0	244	0	1	1
	209095	208487		-	leuD	CCNA_00195	3-isopropylmalate dehydratase small subunit	4730	44	32	10827	152	186	1	1241309843	1509685255	6	32	0	59	0	0	7743	7459	0	1	1
	210531	209092		-	leuC	CCNA_00196	3-isopropylmalate dehydratase large subunit	48482	12959	12523	110975	45016	72854	9	70467833770	495659107703	52	26382	1398	49406	22914	3	17957232120	85713938976	25	0.624787	1
210769			210637	-	-	CCNA_R0004	cell cycle regulated sRNA	12173	0	1700	27864	0	9890	18	9121222667	12801062461	94	6350	0	11891	0	9	2625960074	2869849746	44	0.638268	1
	211522	211121		-	rplS	CCNA_00197	LSU ribosomal protein L19P	17534	0	0	40135	0	0	7	29916469174	13979640894	33	3200	1650	5992	27044	2	10343513186	23648301935	41	0.539652	1
	212256	211519		-	trmD	CCNA_00198	tRNA (guanine-N1) -methyltransferase	114305	0	1700	261645	0	9890	28	2574283914600	696154355319	122	52306	96	97954	1573	14	398422111243	154409669320	67	0.599257	1
	212387	214267		+	-	CCNA_00199	TadG/vWA-family protein	7653	0	4450	17517	0	25888	1	7766189974	15684285009	7	0	1650	0	27044	0	18868363338	17077612944	7	0.480867	1
	215255	214320		-	-	CCNA_00200	2OG-Fe(II) oxygenase superfamily protein	187369	20747	26950	428889	72070	156786	45	4458998751447	6484280173905	234	139332	13249	260931	217161	33	59922195486	4798439735702	255	0.472597	1
	215418	216098		+	-	CCNA_00201	outer membrane protein	13696	13748	150	31350	47757	872	7	31873221634	46329343590	39	49088	2300	91928	37698	15	100216459535	251045063226	95	0.645916	1
	216215	217270		+	-	CCNA_00202	DesA-family fatty acid desaturase	39828	6350	10000	91166	22058	58176	9	78118116261	274031633299	54	42067	4202	78780	68873	8	1694436124	339972986858	69	0.55812	1
	217328	218332		+	-	CCNA_00203	sterol desaturase family protein	0	0	450	0	0	2617	0	42675965	46041785	0	0	0	0	0	0	0	244	0	1	1
	220237	218336		-	kefB	CCNA_00204	glutathione-regulated potassium-efflux system protein kefB	9749	0	4749	22315	0	27628	1	9970605231	19600489419	8	7048	0	13198	0	0	3372744966	3832003144	3	0.66884	1
	220822	220241		-	-	CCNA_00205	NAD(P)H-quinone reductase	3896	0	0	8917	0	0	1	809057759	944337742	5	6847	0	12822	0	2	3146718252	3457851388	11	0.653805	1
	221085	220822		-	-	CCNA_03916	hypothetical protein	60	0	0	137	0	0	0	35945	40276	0	7906	0	14805	0	6	4443694518	5587018250	28	0	0
	220931	221641		+	-	CCNA_00206	succinyl-CoA:3-ketoacid-coenzyme A transferase subunit A	21100	0	1700	48298	0	9890	5	37692499550	25416924000	27	21996	0	41192	0	6	51798229364	32246861050	28	0.508569	1
	221641	222282		+	-	CCNA_00207	succinyl-CoA:3-ketoacid-coenzyme A transferase subunit B	5119	0	8550	11717	0	49741	3	39454854223	27992476844	31	0	0	0	0	0	0	244	0	1	1
	223272	222283		-	-	CCNA_00208	type 1 glutamine amidotransferase (GATase1)-like domain protein	554	0	1950	1268	0	11344	0	1271743238	1891977597	4	0	0	0	0	0	0	244	0	1	1
	224927	223353		-	-	CCNA_00209	undecaprenyl-phosphomannose:protein mannosyltransferase	10231	50	50	23418	173	290	1	8017314461	5760131894	5	11047	2200	20688	36059	1	4862382297	53945699902	18	0.706935	1
	225115	227526		+	-	CCNA_00210	TonB-dependent receptor	324065	0	14800	741788	0	86101	25	28821036965470	11568513998403	114	179173	4299	335542	70463	15	4517152802493	3253911710154	84	0.551744	1
	227686	228693		+	-	CCNA_00211	Porphyromonas-type peptidyl-arginine deiminase	7152	0	3550	16371	0	20652	1	4895648410	12429588427	12	20052	0	37551	0	4	41481611739	28370195251	18	0.582681	1
	228693	229571		+	-	CCNA_00212	N-carbamoylputrescine amidase	6000	5850	0	13734	20321	0	2	4341634775	10828536017	12	0	0	0	0	0	0	244	0	1	1
	229568	230116		+	-	CCNA_00213	ribosomal-protein-alanine acetyltransferase	0	0	0	0	0	0	0	0	356	0	0	0	0	0	0	0	244	0	1	1
	230262	232307		+	-	CCNA_00214	TonB-dependent receptor	304219	68930	93371	696360	239448	543202	41	7579909164771	51160999664199	240	456064	24654	854084	404097	47	16085846745874	45612289522470	307	0.437796	1
232420			232497	+	-	CCNA_R0101	small non-coding RNA	2304	0	0	5273	0	0	5	229294259	283231920	22	0	0	0	0	0	0	244	0	1	1
	232614	233402		+	-	CCNA_00215	SapC surface layer protein	184971	7101	14199	423400	24667	82605	47	6309321125857	3933824501158	224	346522	6050	648941	99164	90	26014277358277	13924253431993	474	0.654667	1
	233862	233470		-	-	CCNA_00216	hot dog superfamily protein	0	0	0	0	0	0	0	0	356	0	0	0	0	0	0	0	244	0	1	1
	233977	236127		+	-	CCNA_00217	thiol:disulfide interchange protein DsbD	103621	73349	118304	237189	254799	688254	24	9499488611034	30328388223313	182	48546	12299	90913	201589	5	555254767876	1564054135833	67	0.656111	1
	236877	236131		-	-	CCNA_00218	conserved hypothetical protein	21378	0	0	48934	0	0	5	48141566342	18963017735	21	4205	476	7874	7801	1	12907	6140446713	10	0.647804	1
	237030	237635		+	-	CCNA_00220	thiol-disulfide isomerase and thioredoxin	2200	0	0	5035	0	0	0	205235844	245278042	2	0	1949	0	31945	0	28140444141	22474176263	26	0.000212345	0.00318908
	238136	237642		-	-	CCNA_00221	hypothetical protein	15150	6300	0	34678	21884	0	7	15327072697	24198583680	38	2950	0	5524	0	1	417035295	596102212	5	0.00981354	0.106902
	238241	239860		+	-	CCNA_00222	glucose-6-phosphate isomerase/glucose-6 phosphate 1-epimerase	12749	37174	62859	29182	129134	365693	12	3717026444388	3808467329428	107	46	0	86	0	0	19123	18656	0	1	1
	239869	240651		+	-	CCNA_00223	esterase lipase Family protein	2950	6383	4863	6752	22173	28291	3	5113386925	24679108775	24	6800	0	12734	0	1	3095135271	3414099525	8	0.685431	1
	242693	240648		-	-	CCNA_00224	TonB-dependent receptor protein	778221	112088	238050	1781356	389370	1384897	100	113102741621932	397720962454191	579	356189	29854	667045	489329	38	1730245292715	37564989232544	282	0.639191	1
	243024	243056		+	-	CCNA_00225	hypothetical protein	11071	0	0	25341	0	0	60	9922737253	6398952177	255	0	0	0	0	0	0	244	0	1	1
	243157	243432		+	-	CCNA_00226	conserved hypothetical protein	2300	0	0	5264	0	0	1	228356114	280817862	6	16	0	29	0	0	1409	2005	0	1	1
	244056	243490		-	-	CCNA_00227	methyltransferase	2510	0	7450	5745	0	43341	3	31070899581	19060744278	28	8049	0	15073	0	2	4639202026	5781713628	13	0.65505	1
	244670	244056		-	-	CCNA_00228	putative membrane spanning protein	3478	0	13395	7961	0	77927	4	131029025421	52530488264	46	0	0	0	0	0	0	244	0	1	1
	244790	245764		+	-	CCNA_00229	CAAX amino terminal protease family protein	9688	5499	9450	22175	19102	54977	4	20722904411	66214223585	32	15900	0	29776	0	3	23770770501	20074613746	15	0.649329	1
	247003	245765		-	-	CCNA_00230	ribosomal large subunit pseudouridine synthase B	45900	300	50	105065	1042	290	6	296719430721	82980877258	28	23355	3283	43737	53810	4	1763377162	148917927240	39	0.560505	1
	247055	247540		+	-	CCNA_00231	tRNA-specific adenosine deaminase	3749	0	0	8581	0	0	1	737811554	857131622	5	0	0	0	0	0	0	244	0	1	1
	247953	247537		-	-	CCNA_00232	hypothetical protein	550	0	1500	1258	0	8726	0	655817490	1201177243	7	0	1150	0	18849	0	7933338064	8489156635	22	0.692711	1
	248082	249119		+	-	CCNA_00233	UDP-N-acetylglucosamine 4,6-dehydratase	10648	0	100	24373	0	581	1	8785484307	6231925319	8	19049	1549	35673	25389	4	1853330907	61738094472	29	0.707273	1
	249116	250276		+	-	CCNA_00234	WecE-family cell wall biogenesis enzyme	47	0	0	107	0	0	0	19863	19621	0	0	0	0	0	0	0	244	0	0	1
	250548	250273		-	-	CCNA_00235	hypothetical protein	0	0	0	0	0	0	0	0	356	0	0	0	0	0	0	0	244	0	1	1
	252308	250611		-	-	CCNA_00236	conserved hypothetical protein	46634	5300	50	106745	18411	290	5	258997293994	126184315892	24	9051	0	16950	0	1	6148529927	6939322744	4	0.530625	1
	252525	253232		+	chvI	CCNA_00237	two-component response regulator chvI	69216	14999	132	158436	52103	767	21	592704374298	418764503226	99	79387	3450	148670	56548	23	357467089733	779080565876	144	0.577254	1
	253207	254811		+	chvG	CCNA_00238	two-component sensor histidine kinase chvG	56894	21597	10800	130230	75023	62830	10	85636048299	678748752372	55	9549	1350	17882	22127	1	221651411	30998268975	12	0.465065	1
	254808	255242		+	hprK	CCNA_00239	serine kinase/phosphatase HprK	2550	0	0	5836	0	0	1	292503561	362094549	4	8200	0	15356	0	3	4851001997	5950050083	17	0.724149	1
	255318	255725		+	-	CCNA_00240	PTS system, IIA component	60250	0	11885	137912	0	69143	32	409802141825	401024587217	169	8399	5039	15729	82593	6	165663050567	151055293363	120	0.556095	1
	255722	256000		+	-	CCNA_00241	phosphocarrier protein HPr	18489	0	0	42321	0	0	12	33977287491	15100074521	50	14648	65	27431	1065	10	17752936505	18659788969	51	0.497377	1
	256344	256240		-	-	CCNA_03917	hypothetical protein	8275	0	7241	18941	0	42125	26	23888190543	27663061679	193	0	784	0	12850	1	3163235395	3492747273	61	0.691489	1
	256810	256412		-	-	CCNA_00243	hypothetical protein	6188	0	1900	14164	0	11053	3	1960267016	6344450619	21	0	450	0	7375	0	834435695	1014903520	9	0.642815	1
	256953	257594		+	-	CCNA_00244	HAD superfamily phophatase	3250	0	8	7439	0	46	0	519848581	626658418	3	960	0	1797	0	0	28163041	63233360	1	0.669356	1
	257623	257907		+	-	CCNA_00245	pterin-4-alpha-carbinolamine dehydratase	0	0	0	0	0	0	0	0	356	0	0	0	0	0	0	0	244	0	1	1
	257952	258737		+	-	CCNA_00246	cyclohexanol dehydrogenase	6582	8850	0	15066	30743	0	3	11173458310	17044994692	19	7849	2000	14699	32781	2	7180513796	39299681913	30	0.584577	1
	259436	258879		-	spdR	CCNA_00247	two-component receiver protein SpdR	5312	50	9519	12159	173	55378	4	51417428103	33772741322	40	15349	0	28744	0	5	21841240211	18932436373	25	0.595811	1
	260914	259514		-	-	CCNA_00248	sensor histidine protein kinase	34751	38624	9748	79545	134171	56710	10	109596411210	690512496309	64	11813	7600	22122	124569	2	461277417850	334404631560	52	0.531054	1
	260971	261561		+	-	CCNA_00249	SCO1/SenC family protein	47246	11648	600	108146	40462	3490	18	218630754314	211178222224	85	25995	50	48681	819	8	74257791211	42056692161	41	0.623254	1
	261642	262904		+	-	CCNA_00250	poly(3-hydroxyalkanoate) depolymerase	165984	17158	15001	379939	59603	87270	28	3963430608048	3860988253513	139	110421	5350	206788	87690	18	662116986174	1583941833538	116	0.524978	1
	262953	263672		+	-	CCNA_00251	zinc metalloprotease	24498	16200	18000	56076	56275	104718	14	47223067803	443709397264	100	44251	0	82870	0	12	277279408184	112268273587	57	0.595506	1
	265745	263784		-	pbpX	CCNA_00252	multimodular transpeptidase-transglycosylase PbpX	356086	15967	24363	815084	55466	141735	36	30590416574595	20524311467489	171	239915	9750	449295	159809	25	5580462090072	8757269932881	155	0.511883	1
	265999	267027		+	-	CCNA_00253	aspartate-semialdehyde dehydrogenase	83333	6420	2118	190750	22301	12321	16	1006234712315	480309793009	73	95443	1800	178738	29503	19	1137767858717	804375978747	101	0.567629	1
	267164	268066		+	-	CCNA_00254	RarD family membrane permease	3634	9451	2649	8318	32830	15411	3	6950051622	24196283528	20	33410	3570	62567	58514	8	198348027	220277327186	67	0.690988	1
	269187	268063		-	-	CCNA_00255	esterase	11043	14550	2581	25277	50543	15015	4	16943157869	58525465983	26	59177	2199	110822	36043	11	216688155538	335385342947	65	0.643633	1
	270057	269206		-	-	CCNA_00256	pyridoxine kinase	3150	0	0	7210	0	0	0	485846546	582543488	2	9500	0	17790	0	2	6905359297	7524114633	10	0.715971	1
	271567	270176		-	-	CCNA_00257	adenosylhomocysteinase	11268	7350	147	25792	25532	855	2	9429216790	21048178362	12	27297	5181	51119	84920	4	32225148203	279392899937	48	0.740684	1
	272620	271910		-	-	CCNA_00259	hypothetical protein	1905	0	0	4360	0	0	0	145285422	169293704	2	7450	200	13951	3278	2	2026056874	7125734155	12	0.0346515	0.327666
	273558	272872		-	-	CCNA_00260	glutathione S-transferase	3950	0	2350	9041	0	13671	1	1664282148	5267438896	11	0	1150	0	18849	0	7933338064	8489156635	13	0.544199	1
	273695	274738		+	-	CCNA_00261	ribonucleoside-diphosphate reductase beta chain	59701	21570	11215	136656	74929	65245	16	102686669966	723636785298	88	87437	50048	163745	820324	26	39833895231419	25295165209143	471	0.0759587	0.624834
	274921	275793		+	-	CCNA_00262	ketopantoate reductase panE/ApbA family protein	6196	0	575	14182	0	3345	1	1941127398	3630749488	6	9250	0	17322	0	2	6477378679	7190231690	9	0.583562	1
	276237	275815		-	-	CCNA_00263	hypothetical protein	504248	62405	43631	1154228	216781	253830	261	54948873770862	63788942333010	1280	163598	15387	306374	252204	85	99950555143	7115132350105	660	0.621919	1
	277637	276384		-	-	CCNA_00264	C4-dicarboxylate transport protein	18592	0	50	42557	0	290	2	34154330354	15379076441	11	7300	50	13670	819	1	3163826249	5208502693	5	0.637254	1
	278017	279471		+	-	CCNA_00265	AMP nucleosidase	222257	0	3849	508748	0	22392	28	12608339407945	3942712015625	121	130496	3700	244383	60645	18	1874310631406	1694343266555	104	0.519046	1
	280837	279599		-	-	CCNA_00266	3-ketoacyl-CoA thiolase	0	0	0	0	0	0	0	0	356	0	0	50	0	819	0	4272146	8614684	0	1	1
	281872	280931		-	-	CCNA_00267	MutT-like protein	17804	10537	6400	40753	36603	37233	6	109379059	99132258849	40	52758	16486	98801	270217	14	1586672377181	2606370002745	195	0.0759626	0.624834
281946			282042	+	-	CCNA_R0005	4.5S signal recognition particle RNA	356942	13830	5910	817043	48042	34382	704	36560889984051	14587292862351	3090	54941	2790	102889	45730	120	113701736795	345487596018	766	0.444364	1
	282130	283956		+	dnaX	CCNA_00268	DNA polymerase III subunit gamma/tau	132510	49603	11353	303316	172310	66048	19	1513519155540	4142649192127	98	79088	4348	148110	71267	9	231320622987	894156074735	60	0.587176	1
	284102	284431		+	-	CCNA_00269	YbaB/EbfC-family DNA-binding protein	5612	0	3399	12845	0	19774	4	4013070170	10038016743	32	4872	0	9123	0	2	1390254889	1596278450	13	0.651128	1
	284558	285160		+	recR	CCNA_00270	Recombination protein recR	18690	14199	8200	42781	49324	47704	12	300526161	171388653450	77	13650	4600	25562	75397	6	81817596174	158439274579	83	0.477593	1
	285270	285422		+	-	CCNA_00271	hypothetical protein	4252	0	0	9732	0	0	5	998020667	1139619131	21	0	0	0	0	0	0	244	0	1	1
	285476	286765		+	-	CCNA_00272	RmuC family protein	539367	172201	60703	1234616	598190	353150	108	37948243039782	121172485435036	564	1069855	65049	2003548	1066202	178	93610343363622	428716102809380	1189	0.664811	1
	286774	287295		+	-	CCNA_00273	peptide deformylase	152555	54282	56506	349199	188564	328733	91	724520731594	13099090017815	553	349294	28939	654133	474332	147	1779365033679	35311738242033	1080	0.645703	1
	287636	287998		+	-	CCNA_00274	conserved hypothetical protein	122	0	50	279	0	290	0	207897	1450443	0	6799	0	12732	0	3	3093968708	3409699558	17	4.26938e-128	2.52759e-126
	289527	288082		-	-	CCNA_00275	transposase, DDE family	97894	28981	12674	224080	100673	73733	17	588265102962	1764205363551	91	174337	13899	326486	227815	26	421520670565	6984152995383	191	0.644625	1
	290096	289617		-	-	CCNA_00276	conserved hypothetical protein	0	0	1375	0	0	7999	0	623361762	733200520	5	1920	0	3595	0	0	148744663	263865245	3	0.574037	1
	290161	291321		+	-	CCNA_00277	succinyl-diaminopimelate desuccinylase	8250	0	2950	18884	0	17162	1	4415658189	11915773532	10	0	0	0	0	0	0	244	0	1	1
	291339	292259		+	-	CCNA_00278	glutaminase	1300	0	17949	2975	0	104421	3	287023245977	84811258251	38	0	0	0	0	0	0	244	0	1	1
	292311	292901		+	-	CCNA_00279	NAD(P)H-quinone reductase	842	0	3850	1927	0	22398	1	6687689718	5957855976	13	4399	0	8238	0	1	1088269093	1281374106	6	0.621986	1
	293641	292898		-	-	CCNA_00280	tRNA pseudouridine synthase A	2000	2999	0	4578	10417	0	1	836854190	2694059063	6	0	0	0	0	0	0	244	0	1	1
	294567	293641		-	-	CCNA_00281	methionyl-tRNA formyltransferase	3600	7400	2699	8240	25706	15701	2	2900446060	19415254824	17	7000	0	13109	0	1	3318417007	3770023210	7	0.668975	1
	294659	294991		+	-	CCNA_00282	conserved cell surface protein	37465	44119	11700	85757	153260	68066	50	146808172655	889606627140	307	73145	17350	136980	284379	55	1104462295516	3556327903589	632	0.636439	1
	295969	295109		-	-	CCNA_00283	2,3,4,5-tetrahydropyridine-2-carboxylate N-succinyltransferase	1950	0	0	4463	0	0	0	153659379	184155735	1	14196	2000	26585	32781	3	549327558	58651073376	34	1.26695e-20	4.10754e-19
	296631	295966		-	-	CCNA_00284	pyrimidine 5'-nucleotidase family protein	13250	0	0	30329	0	0	3	15272632939	8802589135	15	42897	0	80334	0	13	257349036057	106003336916	60	0.868198	1
	297542	296628		-	-	CCNA_00285	acetylglutamate kinase	23607	0	0	54036	0	0	4	61079314962	22345726947	19	6200	0	11610	0	1	2479484128	2719224109	6	0.686228	1
	298193	297735		-	lovR	CCNA_00286	two-component receiver domain protein LovR	101377	171724	67654	232053	596533	393588	134	4244069197567	32905795150246	887	475952	100984	891329	1655204	255	57281913528930	246992572895965	2774	0.730572	1
	299318	298212		-	lovK	CCNA_00287	photosensory histidine protein kinase LovK	99249	52031	41571	227181	180744	241846	31	64421933444	6312005972708	195	1229580	108598	2302670	1780003	245	23041152515579	770352850194967	1844	0.00381583	0.045578
	300534	299485		-	-	CCNA_00288	ABC-type sulfate transport system, periplasmic component	5805	0	2051	13287	0	11932	1	1877687858	6345879629	8	0	1296	0	21242	0	10568977564	10934385034	10	0.546684	1
	300797	300549		-	-	CCNA_00289	hypothetical protein	351	0	0	803	0	0	0	2504802	3765462	1	0	648	0	10621	0	2002446819	2222514008	21	4.52615e-31	1.69627e-29
	304305	301048		-	-	CCNA_00290	autotransporter protein	340160	55297	95161	778629	192090	553615	27	13513459077831	54984260021590	155	203937	12950	381918	212260	13	1547898318711	8251039796879	91	0.599638	1
	304469	305884		+	phoR	CCNA_00291	phosphate regulon sensor protein phoR	37528	20850	24491	85901	72428	142480	10	93000045616	853246162184	70	9049	2385	16946	39091	1	11679537605	52773443561	19	0.983171	1
	306029	307462		+	pstC	CCNA_00292	phosphate transport system permease protein pstC	52411	145	10617	119969	503	61766	7	290421219432	309844202230	42	65925	1	123459	16	9	721578405595	228408669291	43	0.487193	1
	307455	308750		+	pstA	CCNA_00293	phosphate transport system permease protein pstA	23887	39	98	54677	135	570	3	61868462957	23328014396	14	29702	0	55623	0	4	106506125487	52029687442	21	0.576284	1
	308810	309634		+	pstB	CCNA_00294	phosphate transport ATP-binding protein pstB	6699	3250	4600	15334	11289	26761	3	2347235532	21881548275	21	15850	1700	29682	27864	4	28959383	55389160748	34	0.589337	1
	309660	310352		+	phoU	CCNA_00295	phosphate transport system protein phoU	16150	0	100	36967	0	581	4	24103687800	12698110582	18	0	2400	0	39337	0	46375325557	30283186750	28	0.588822	1
	310374	311066		+	phoB	CCNA_00296	phosphate regulon response regulator PhoB	5900	0	0	13505	0	0	1	2190995635	2216330618	6	0	1000	0	16390	0	5672225576	6579699067	11	0.623107	1
	311896	311039		-	-	CCNA_00297	two-component response regulator	11999	0	850	27465	0	4945	2	9937545973	9918346785	12	0	0	0	0	0	0	244	0	1	1
	312666	311893		-	-	CCNA_00298	hypothetical protein	2699	0	0	6178	0	0	0	335343158	418081004	2	0	2068	0	33896	0	32442946291	24557379671	21	0.00384956	0.0457135
	312678	313961		+	-	CCNA_00299	phosphoribosylamine--glycine ligase	10485	0	0	24000	0	0	1	8708863316	5814482410	6	0	2000	0	32781	0	29940378093	23376702940	12	0.637513	1
	314385	313978		-	-	CCNA_00300	glyoxalase superfamily protein	349352	23467	2900	799670	81519	16871	167	33974560572790	14519949743542	733	380544	8319	712655	136354	193	29128793773383	17564131205844	1040	0.583307	1
	314615	315697		+	-	CCNA_00301	phosphotransferase family protein	8850	0	0	20257	0	0	1	5797420481	4455015868	6	0	731	0	11981	0	2673913614	2915033225	5	0.520004	1
	315702	316991		+	-	CCNA_00302	imidazolonepropionase-related amidohydrolase	6851	6550	0	15682	22753	0	1	5737549877	13140324221	9	8651	51	16200	835	1	4857828320	6995006584	6	0.58634	1
	318034	317027		-	lpxK	CCNA_00303	tetraacyldisaccharide-1-P 4'-kinase	0	0	0	0	0	0	0	0	356	0	5401	0	10114	0	1	1780652129	1996873243	5	1	1
	319308	318031		-	-	CCNA_00304	3-deoxy-D-manno-octulosonic-acid transferase	3800	3050	4998	8698	10595	29076	1	5290236621	18605761578	12	0	2950	0	48352	0	76095446136	40424525989	18	0.577052	1
	320303	319278		-	czcD	CCNA_00305	cobalt-zinc-cadmium resistance protein czcD	10105	5800	0	23130	20147	0	2	6908366079	15612756006	14	0	0	0	0	0	0	244	0	1	1
	321048	320335		-	-	CCNA_00306	lysophospholipid acyltransferase	6998	0	350	16018	0	2036	1	2865664443	3788110175	8	0	0	0	0	0	0	244	0	1	1
	322868	321045		-	-	CCNA_00307	phospholipid-lipopolysaccharide ABC transporter	58793	100	10601	134577	347	61673	6	385174805797	359868338619	35	7600	0	14232	0	0	4042055286	4985849918	3	0.000852268	0.0114148
	323024	323689		+	ctpA	CCNA_00308	protein tyrosine phosphatase CtpA	1550	0	0	3547	0	0	0	88536287	97756861	1	0	0	0	0	0	0	244	0	1	1
323778			323716	-	-	CCNA_R0102	small non-coding RNA	3875	0	3875	8869	0	22543	22	5402432247	9376679530	166	12290	0	23015	0	39	12811216082	12807243774	182	0.516627	1
	324045	323812		-	-	CCNA_00309	conserved hypothetical protein	45326	18630	12554	103751	64716	73035	59	22453382508	552961412982	344	7000	0	13109	0	6	3318417007	3770023210	28	3.97419e-07	7.91929e-06
	324845	324066		-	-	CCNA_00310	3'-phosphoadenosine-5'-phosphosulfate (PAPS) 3'-phosphatase family protein	19630	0	1200	44933	0	6981	4	33135946772	20867608295	22	26698	0	49998	0	6	82461327597	42767021946	32	0.569522	1
	326173	324842		-	-	CCNA_00311	Zn-dependent protease family protein	34978	25748	5200	80065	89443	30251	8	64018989750	371819828855	49	20975	2450	39280	40157	3	5034585	103766222270	29	0.589369	1
	326630	326229		-	-	CCNA_00312	putative membrane spanning protein	8098	6896	5160	18536	23955	30019	9	1052467489	38632972771	60	2863	0	5361	0	1	388109220	566433368	6	0.000248828	0.0037233
	328544	326715		-	-	CCNA_00313	peptidase, M14 family	12347	7497	8392	28262	26043	48821	2	6879022784	77212152085	18	6452	1250	12082	20488	0	1142295670	23154524612	8	0.643854	1
	329198	328587		-	-	CCNA_00314	hypothetical protein	10894	0	0	24936	0	0	3	9546381556	6223998177	13	0	0	0	0	0	0	244	0	1	1
	330753	329224		-	-	CCNA_00315	3-polyprenyl-4-hydroxybenzoate decarboxylase	5399	6149	2155	12358	21360	12537	1	808371570	17312380311	10	5900	50	11049	819	0	1830060832	2858874050	3	0.667339	1
	331910	330777		-	-	CCNA_00316	glutamate 5-kinase	11748	0	2600	26891	0	15125	2	8152450637	14938165318	12	41407	0	77544	0	7	236417534831	98976527741	34	0.671169	1
	332971	331907		-	cgtA	CCNA_00317	GTP-binding protein CgtA	21399	13997	3950	48982	48622	22979	6	10383565874	113053719624	37	60649	4700	113579	77036	12	38859220142	653568123753	89	0.645962	1
	333179	334138		+	-	CCNA_00318	hypothetical protein	24412	6000	8889	55879	20842	51713	7	18907911473	134967678887	44	33449	7500	62640	122930	8	129226828657	610926221211	96	0.637979	1
	334757	334224		-	-	CCNA_00319	acetyltransferase, GNAT family	89314	6948	1429	204440	24135	8313	33	1228527767653	531898387107	147	33238	0	62245	0	12	139513018885	63997293488	58	0.647559	1
	335209	334940		-	-	CCNA_00320	LSU ribosomal protein L27P	49621	0	50	113582	0	290	33	362133253731	97613691249	140	43457	2000	81383	32781	34	77043134515	197094095398	211	0.578569	1
	335755	335240		-	-	CCNA_00321	LSU ribosomal protein L21P	356985	18386	5699	817142	63869	33154	134	35793201803551	15299987425788	590	194065	2050	363431	33601	77	7632386885905	3084675746711	384	0.574053	1
	335959	336588		+	-	CCNA_00322	conserved hypothetical protein	306115	106395	32146	700700	369593	187014	128	9943223145552	35125530265596	665	297208	9155	556590	150057	98	12606482837757	12414850004815	560	0.527333	1
	336631	337728		+	-	CCNA_00323	low-affinity zinc transport protein	273505	90096	68191	626055	312974	396713	71	3187015024649	40391524228555	405	433025	16950	810938	277823	83	24162071801030	32264333197786	495	0.446748	1
	338390	337932		-	-	CCNA_00324	ExbD-family protein	62304	13799	0	142614	47934	0	30	463292142750	338164815012	138	14200	0	26592	0	6	18120342836	16595123695	28	0.60856	1
	338634	339665		+	-	CCNA_00326	vegetatible incompatibility protein HET-E-1	10849	0	238	24833	0	1384	1	8858296016	6793217082	8	6950	0	13015	0	1	3261594920	3672673540	6	0.558967	1
339708			339810	+	-	CCNA_R0103	small non-coding RNA	0	1386	34	0	4814	197	2	175631661	241892194	16	0	0	0	0	0	0	244	0	1	1
	340490	339828		-	-	CCNA_00327	FMN-binding nitroreductase family enzyme	7600	0	0	17396	0	0	2	4022842738	3591533109	8	7400	2800	13858	45894	3	28333217088	59365817399	45	0.569463	1
	340575	341264		+	mtgA	CCNA_00328	monofunctional biosynthetic peptidoglycan transglycosylase MtgA	3049	0	1900	6979	0	11053	1	985698791	3780939571	8	0	0	0	0	0	0	244	0	1	1
	341277	341825		+	-	CCNA_00329	ribosomal-protein-alanine acetyltransferase	0	0	0	0	0	0	0	0	356	0	0	0	0	0	0	0	244	0	1	1
	342602	341832		-	mopB	CCNA_00330	molybdenum-pterin binding protein mopB	4394	0	0	10057	0	0	1	1079888134	1217526016	4	0	0	0	0	0	0	244	0	1	1
	342674	343432		+	-	CCNA_00331	molybdate-binding protein	76866	50	8646	175947	173	50299	20	788024857041	484946387612	99	82489	16248	154479	266316	26	569336760829	3544996431619	277	0.677778	1
	343435	344109		+	-	CCNA_00332	molybdenum transport system permease protein modB	13850	0	22922	31702	0	133352	9	420007462534	253147441366	81	0	0	0	0	0	0	244	0	1	1
	344957	344130		-	-	CCNA_00333	LytTr DNA-binding domain protein	4451	0	0	10188	0	0	0	1113955754	1261181806	4	0	50	0	819	0	4272146	8614684	0	3.66233e-05	1
	345020	345580		+	-	CCNA_00334	conserved hypothetical membrane protein	6316	0	2250	14457	0	13089	2	2317207130	7416699083	16	0	1850	0	30322	0	24830349320	20676615529	27	0.598477	1
	345618	346055		+	-	CCNA_00335	putative secreted protein	9674	50	4926	22143	173	28657	6	10407880212	20257837828	38	21200	0	39701	0	9	47411912694	30671360042	45	0.527281	1
	346066	347517		+	-	CCNA_00336	lignostilbene-alpha,beta-dioxygenase	11566	5849	16628	26474	20318	96736	4	127943810204	183684760850	32	18948	806	35484	13210	2	11843490662	40877805501	16	0.617743	1
	347595	348305		+	-	CCNA_00337	TetR-family transcriptional regulator	7759	0	5601	17760	0	32584	3	12886858944	19856622844	23	0	1800	0	29503	0	23251064239	19772190866	20	0.529603	1
	348479	350719		+	-	CCNA_00338	TonB-dependent receptor	139053	50	2099	318293	173	12211	11	4114755633957	1060231348816	49	72318	1699	135432	27847	6	518761984939	439385275836	36	0.550197	1
	350788	352104		+	-	CCNA_00339	transporter, major facilitator superfamily	17560	50	23398	40195	173	136121	5	422863488731	290768288608	44	10900	0	20412	0	1	9604822610	10081161210	7	0.0671515	0.562119
	352434	353633		+	-	CCNA_00340	succinyl-CoA synthetase beta chain	25128	9793	6706	57518	34018	39013	6	6645950719	141506105503	36	43663	779	81768	12768	7	178649507373	140991215778	39	0.478326	1
	353634	354518		+	sucD	CCNA_00341	succinyl-CoA synthetase alpha chain	37675	18204	89434	86238	63236	520297	29	9679881268718	6750318464620	252	7595	0	14223	0	1	4035923371	4927630277	8	2.67899e-48	1.17674e-46
	354697	357660		+	odhA	CCNA_00342	2-oxoglutarate dehydrogenase E1 component	824165	589120	383151	1886522	2046479	2229047	109	3643727808261	1632852651496170	692	1820405	928367	3409125	15216636	188	4.09208e+16	2.86506e+16	3141	0.796975	1
	357720	358928		+	odhB	CCNA_00343	dihydrolipoamide succinyltransferase	347213	243735	186089	794774	846684	1082605	116	2792674525639	201498878237378	751	90249	3400	169011	55728	15	587163952359	937142949491	92	0.00103045	0.0137562
	358988	359335		+	-	CCNA_00344	conserved hypothetical protein	5250	0	0	12017	0	0	2	1655636713	1731817390	11	15301	0	28654	0	8	21677471351	18835799292	41	0.718054	1
	360176	359343		-	-	CCNA_00345	alpha/beta family hydrolase	5350	7249	0	12246	25181	0	2	6922025415	12635658850	14	26598	2000	49810	32781	6	6217530955	111580204381	49	0.69173	1
	360419	361819		+	-	CCNA_00346	dihydrolipoamide dehydrogenase	32268	66402	38097	73861	230666	221635	17	736605800629	3848718256421	125	59341	4700	111129	77036	9	32897320808	632740850060	67	0.606538	1
	361909	362088		+	-	CCNA_00347	hypothetical protein	998	0	0	2284	0	0	1	30783998	34332065	4	0	0	0	0	0	0	244	0	1	1
362212			362113	-	-	CCNA_R0104	small non-coding RNA	0	0	0	0	0	0	0	0	356	0	0	0	0	0	0	0	244	0	1	1
	364221	362218		-	-	CCNA_00348	methyl-accepting chemotaxis protein	6200	0	1700	14191	0	9890	0	1856227719	5851408618	4	7400	1950	13858	31961	0	7200544358	37295625371	11	0.686155	1
	365309	364395		-	-	CCNA_00349	integrase/recombinase, XerC-CodV family	2250	0	0	5150	0	0	0	216666557	267408729	1	0	0	0	0	0	0	244	0	1	1
	365986	365306		-	-	CCNA_00350	conserved hypothetical protein	1350	0	0	3090	0	0	0	63585024	69273721	1	0	4950	0	81134	1	263542666482	107988665675	59	2.70917e-119	1.53708e-117
	366112	368271		+	-	CCNA_00351	primosomal protein N'	10649	0	5700	24375	0	33160	1	14589891610	24918607931	8	0	0	0	0	0	0	244	0	1	1
	369155	368358		-	-	CCNA_00352	integral membrane protein	13036	0	0	29839	0	0	2	14687122880	8549176582	12	0	0	0	0	0	0	244	0	1	1
	369280	370374		+	-	CCNA_00353	O-antigen acetylase	10285	0	1935	23542	0	11257	2	5892277627	11237140268	10	7599	0	14230	0	1	4040692163	4946650021	6	0.601688	1
	370445	371152		+	-	CCNA_00354	NlpC/P60 CHAP domain amidase protein	77788	0	10	178057	0	58	19	1068135838363	296165348702	83	5176	250	9693	4097	1	430200092	4457461466	9	0.00167026	0.0215918
	371323	372567		+	-	CCNA_00355	hypothetical protein with pentapeptide repeats	50	50	1100	114	173	6399	0	345555777	496343484	1	50	50	93	819	0	3198982	11440899	0	0.0428422	1
372817			372505	-	-	CCNA_R0105	small non-coding RNA	16267	50	0	37235	173	0	9	24849751396	12626511399	39	50	0	93	0	0	23077	-5668	0	1	1
	372638	373402		+	-	CCNA_00356	outer membrane protein	28353	0	4903	64900	0	28524	7	67523029383	62047052625	40	15710	0	29420	0	4	23094385414	19681594456	19	0.646596	1
	373511	374938		+	-	CCNA_00357	secretory tripeptidyl aminopeptidase	41698	6600	11451	95447	22927	66618	7	89098848979	319031699447	43	67487	6100	126384	99983	10	17809548559	950268600668	79	0.618003	1
	375836	374976		-	-	CCNA_00358	delta 3,5-delta2,4-dienoyl-CoA isomerase precursor	700	0	0	1602	0	0	0	13141487	16038047	0	0	2499	0	40960	0	51100821310	32003833582	23	2.46338e-130	1.47984e-128
	375919	376716		+	-	CCNA_00359	SH3 domain-containing cell surface protein	92816	15350	40078	212456	53322	233160	33	962001972721	3352240468704	208	255078	26851	477692	440108	71	41569155708	21327750110774	575	0.694259	1
	376916	377806		+	-	CCNA_00360	alpha/beta hydrolase superfamily protein	10669	0	12699	24421	0	73878	4	95838938104	69360098963	36	86888	6999	162717	114718	21	74768946281	1417650647928	155	0.293585	1
	378750	377803		-	-	CCNA_00361	hot dog superfamily thioesterase	12816	7150	20374	29335	24837	118529	7	216351783515	278316083428	60	33391	13958	62532	228782	10	1474320739078	1552323634003	153	0.6666	1
	379287	378802		-	-	CCNA_00362	zinc uptake regulation protein	242536	93336	127822	555167	324229	743626	173	5937558190271	63631358269888	1113	187073	75980	350337	1245369	109	83786983674032	77500287838296	1641	0.593593	1
	380100	379324		-	-	CCNA_00363	PAP2 bacterial acid phosphatase	550	0	0	1258	0	0	0	7356778	9897945	0	0	0	0	0	0	0	244	0	1	1
	381273	380179		-	-	CCNA_00364	deoxyhypusine synthase	96942	50	1900	221901	173	11053	16	1708128071150	514857017628	70	108296	4718	202809	77331	20	750457696577	1443605654605	127	0.615678	1
	382655	381396		-	-	CCNA_00365	ornithine decarboxylase	22208	50	5490	50834	173	31939	3	38004856207	49369604905	21	14446	4650	27053	76217	3	79198564367	164869639996	40	0.610767	1
	383009	383803		+	-	CCNA_00366	phosphonates transport ATP-binding protein phnC	7100	0	3700	16251	0	21525	2	5247077924	12813234687	15	4849	0	9080	0	1	1374580066	1580150795	5	0.668489	1
	383800	384825		+	-	CCNA_00367	phosphonates-binding protein	21442	0	0	49080	0	0	3	48487012269	19056887549	15	14700	1500	27529	24586	3	92015437	46169248147	25	0.587891	1
	384831	385667		+	-	CCNA_00368	phosphonates transport system permease protein phnE	5899	7899	2649	13502	27439	15411	3	2031879586	24039262832	22	0	0	0	0	0	0	244	0	1	1
	385817	387130		+	-	CCNA_00369	magnesium and cobalt efflux protein corC-like protein	73452	183540	82298	168132	637579	478782	46	8076120516076	36908290166153	325	117993	6449	220968	105703	19	612121869974	1957945660847	124	0.653308	1
	387425	387559		+	-	CCNA_03918	hypothetical protein	3700	0	387	8469	0	2251	5	550949083	1395567784	26	0	0	0	0	0	0	244	0	1	1
	388085	387576		-	-	CCNA_00370	ATP synthase B chain	24239	0	0	55483	0	0	8	65078620678	23398990961	36	11300	2750	21161	45074	5	14043836326	72034485637	64	0.606089	1
	388629	388096		-	-	CCNA_00371	ATP synthase B' chain	8093	0	200	18524	0	1163	2	4349238071	4280389653	12	0	50	0	819	0	4272146	8614684	0	5.63318e-20	1
	388980	388756		-	-	CCNA_00372	ATP synthase C chain	52246	13971	10377	119591	48532	60370	61	98501010109	494106967722	338	10475	1848	19616	30290	11	2026512474	42633497794	110	0.666665	1
	389791	389030		-	-	CCNA_00373	ATP synthase A chain	42741	11101	5450	97834	38562	31706	14	88216366707	263159594462	73	0	0	0	0	0	0	244	0	1	1
	390177	389797		-	-	CCNA_00374	putative ATP synthase protein I	187623	5800	14822	429471	20147	86229	99	6616177233682	4032014735182	468	21852	50	40922	819	11	48572278330	32823165080	54	0.000464222	0.00658453
	390599	390988		+	-	CCNA_00375	conserved hypothetical protein	85995	0	100	196843	0	581	40	1354585687600	362983946061	168	79350	0	148601	0	41	1126201657023	345380153145	190	0.468121	1
	391059	391838		+	-	CCNA_00376	putative membrane spanning protein	5723	6995	0	13100	24299	0	2	6367989367	12621935134	15	0	0	0	0	0	0	244	0	1	1
	395396	391953		-	smc	CCNA_00377	chromosome partition protein Smc	13499	0	7350	30899	0	42759	1	26628394261	39831990258	7	3251	4950	6088	81134	0	218549653792	122886346695	12	0.60344	1
	396026	395418		-	-	CCNA_00378	thiol:disulfide interchange protein dsbA	57322	162544	19190	131210	564643	111641	71	9552047071425	10822534103506	441	25849	5850	48408	95885	10	72832270731	320839728618	118	0.704583	1
	396640	396026		-	-	CCNA_00379	thiol:disulfide interchange protein dsbA	17635	21447	1200	40366	74502	6981	11	73824884789	116291045864	66	17929	1200	33576	19668	6	3824716434	48012752562	43	0.577745	1
396827			396704	-	-	CCNA_R0106	small non-coding RNA	21376	0	0	48929	0	0	31	48129761586	18959616935	131	0	0	0	0	0	0	244	0	1	1
	397418	396879		-	-	CCNA_00380	conserved hypothetical cytosolic protein	18748	0	4350	42914	0	25306	7	25195658449	34260463553	42	18599	1150	34830	18849	7	5338429243	48690609989	49	0.530792	1
	397466	398515		+	-	CCNA_00381	A/G-specific adenine DNA glycosylase	6401	0	0	14651	0	0	1	2664010567	2576134654	4	16413	0	30737	0	3	25653790917	21136254882	14	0.705569	1
	399713	398637		-	ccrM	CCNA_00382	adenine-specific methyltransferase ccrM	21446	0	649	49090	0	3775	3	44408332559	21516905002	16	35447	0	66382	0	6	162811397590	72318875832	30	0.614837	1
	400487	399852		-	-	CCNA_00383	ribonuclease HII	6300	0	0	14420	0	0	1	2564313532	2492401152	7	0	0	0	0	0	0	244	0	1	1
	400574	401479		+	-	CCNA_00384	glucan endo-1,3-beta-glucosidase	9849	12900	16650	22544	44811	96864	7	98938140109	250405481393	60	0	2000	0	32781	0	29940378093	23376702940	18	0.695807	1
	401527	402861		+	-	CCNA_00385	multidrug resistance protein	11199	0	7452	25634	0	43353	2	25830478044	35034252234	17	8499	2800	15916	45894	1	24159635505	63154192783	23	0.555423	1
	403445	402858		-	-	CCNA_00386	DNA-3-methyladenine glycosylase	6349	0	1099	14532	0	6393	2	1860418576	4662525128	11	6720	1204	12584	19734	2	774637479	22881415613	27	0.660146	1
	403575	403997		+	-	CCNA_00387	hypothetical protein	253015	96480	58236	579153	335151	338798	174	2235983169054	34854752209788	987	30489	1158	57097	18980	15	42998065279	95215227387	89	2.86701e-07	5.76934e-06
	405006	404125		-	-	CCNA_00388	esterase lipase Family protein	7897	0	0	18076	0	0	1	4410624556	3794385896	6	0	0	0	0	0	0	244	0	1	1
	405895	405104		-	-	CCNA_00389	aminomethyltransferase family protein	8050	8150	4200	18426	28311	24434	4	747280364	37238820577	29	0	0	0	0	0	0	244	0	1	1
	405999	407213		+	-	CCNA_00390	ADP-heptose--LPS heptosyltransferase	86791	21399	25750	198665	74335	149805	20	325392629081	2070957732439	115	182531	9748	341831	159777	32	1833346468598	5437112484390	206	0.619006	1
	407210	407767		+	-	CCNA_00391	conserved hypothetical protein	4550	13150	6999	10414	45680	40717	8	18790583476	67043795846	57	0	50	0	819	0	4272146	8614684	0	0	0
	407848	409182		+	-	CCNA_00392	dihydroorotase	88232	44747	41953	201963	155441	244068	23	141944260142	5324737360275	150	80813	17748	151340	290903	14	968752232638	3985712418776	165	0.46973	1
	410552	409326		-	-	CCNA_00393	RNA polymerase sigma factor	6658	0	0	15240	0	0	0	2928319200	2774295798	4	0	0	0	0	0	0	244	0	1	1
	410899	410549		-	-	CCNA_00394	YCII-related domain protein	3992	128	4	9137	444	23	2	807743557	1107528091	9	1733	338	3245	5540	1	50657360	1469301203	12	0.572036	1
	411052	412842		+	-	CCNA_00395	feruloyl-CoA synthetase	7350	10300	5801	16824	35780	33748	2	4381460450	53061266198	16	8800	2302	16480	37731	1	10579727881	49601601386	15	0.5131	1
	413610	412933		-	-	CCNA_00396	conserved hypothetical protein	2406	0	3661	5507	0	21298	1	5064629285	7065986584	13	0	0	0	0	0	0	244	0	1	1
	413741	415279		+	-	CCNA_00397	acetolactate synthase	20337	14299	3750	46551	49671	21816	4	10980551172	106940308654	25	15049	0	28182	0	1	20830339609	18317843141	9	0.684958	1
	416764	415406		-	-	CCNA_00398	hypothetical protein	579740	412127	68835	1327030	1431642	400459	141	64512976296023	284868584211687	774	827849	95237	1550337	1561006	137	2024234982	443938433988603	1144	0.5925	1
	416919	418016		+	-	CCNA_00399	zinc metallohydrolase, glyoxalase II family	12701	0	1250	29072	0	7272	2	10753211983	12073128172	11	5948	3999	11138	65546	1	101007735239	96764049392	34	0.689251	1
	418061	418504		+	-	CCNA_00400	MarR/EmrR-family transcriptional regulator	14469	0	2200	33119	0	12798	6	13633284675	17108431097	34	6499	0	12170	0	2	2776268035	3012050906	13	0.663063	1
	418501	419271		+	-	CCNA_00401	enoyl-CoA hydratase	13190	7000	3650	30192	24316	21234	5	601818960	41985782770	32	8601	0	16107	0	2	5440003611	6403333457	10	0.702429	1
	419275	419691		+	-	CCNA_00402	conserved hypothetical membrane protein	4554	0	0	10424	0	0	1	1176893245	1324957596	8	0	0	0	0	0	0	244	0	1	1
	419728	420699		+	-	CCNA_00403	short chain dehydrogenase	6154	16789	21273	14086	58321	123759	8	240004919712	358284578401	67	14086	2350	26379	38518	3	2759325892	69279348347	33	0.618949	1
	420699	421214		+	-	CCNA_00404	hypothetical protein	2100	10286	0	4806	35731	0	4	19510204612	14180409568	26	4521	0	8466	0	1	1161961769	1352618284	8	0.680729	1
	421211	422068		+	-	CCNA_00405	short chain dehydrogenase	1450	0	0	3319	0	0	0	75486945	81958728	1	19509	1350	36535	22127	4	4163062056	57364886375	34	1.23907e-47	5.38467e-46
422074			422176	+	-	CCNA_R0107	small non-coding RNA	1350	50	0	3090	173	0	2	59573909	78689200	10	0	0	0	0	0	0	244	0	1	1
	422538	422170		-	tfoX	CCNA_00406	DNA transformation protein tfoX	1500	232	600	3433	805	3490	1	44256593	673579332	6	0	0	0	0	0	0	244	0	1	1
	422528	423007		+	-	CCNA_00407	acetyltransferase	0	0	0	0	0	0	0	0	356	0	0	0	0	0	0	0	244	0	1	1
	424308	423040		-	-	CCNA_00408	antiporter protein	1950	0	4049	4463	0	23555	0	6816508295	7640203285	7	13650	0	25562	0	2	16481305075	15486240623	10	0.562	1
	424406	424450		+	-	CCNA_00409	hypothetical protein	1031	0	0	2359	0	0	4	33266067	37015843	17	6095	0	11414	0	27	2380207881	2602681318	126	0.00127666	0.016769
	424513	425043		+	-	CCNA_00410	acetyltransferase	5151	0	0	11790	0	0	1	1581567116	1671847395	7	0	0	0	0	0	0	244	0	1	1
	425076	425639		+	-	CCNA_00411	conserved hypothetical protein	25220	14849	13050	57728	51582	75920	17	7006793699	319839983831	109	24949	0	46722	0	8	70083442364	38366243796	41	0.657274	1
	425636	426286		+	-	CCNA_00412	CoA pyrophosphatase	17321	19450	8148	39647	67565	47402	12	9569351911	219226420196	79	14150	0	26499	0	4	17968621902	16493355494	20	0.719921	1
	426379	427632		+	-	CCNA_00413	poly(A) polymerase/tRNA-nucleotidyltransferase	12495	0	0	28601	0	0	1	13266898874	7925620595	7	16572	0	31034	0	2	26252738891	21465400530	12	0.595873	1
	427653	428354		+	-	CCNA_00414	type 1 glutamine amidotransferase (GATase1) domain protein	6052	15001	0	13853	52110	0	5	43142985278	32110775369	31	2646	0	4955	0	0	321268989	486621781	3	0.000344945	0.00497915
	429584	428613		-	-	CCNA_00415	hypothetical protein	280643	127626	376315	642394	443345	2189278	146	225334008746605	312037383098328	1123	146801	19497	274918	319570	34	62861132906	8260760013483	305	0.704088	1
	430123	429725		-	-	CCNA_00416	conserved hypothetical membrane protein	387138	67126	74659	886162	233181	434341	240	18125045878123	57547649128881	1297	598397	23452	1120635	384396	316	52433538968218	67906434357262	1886	0.590349	1
	430498	430127		-	-	CCNA_00417	conserved hypothetical membrane protein	2457661	342706	241302	5625611	1190488	1403816	1483	2267790777464890	3096102596096290	7365	2706634	463735	5068792	7600967	1729	1016597237721600	1.00654e+16	17029	0.690492	1
	430733	431269		+	-	CCNA_00419	fasciclin domain cell surface protein	210936	20631	1950	482834	71667	11344	78	9596988982782	4610340967222	351	161298	4899	302067	80298	62	2943920086613	2825062332976	356	0.486732	1
	431885	431334		-	-	CCNA_00420	hypothetical protein	12332	3948	18518	28228	13714	107731	11	195095291983	203506337395	90	630	50	1179	819	0	594141	81332840	1	2.96959e-163	1.95658e-161
	432286	431882		-	-	CCNA_00421	dihydroneopterin aldolase	4642	0	8205	10625	0	47734	5	36109474997	25543407201	48	4230	0	7921	0	2	990457957	1182913554	9	0.0877583	0.702479
	433088	432336		-	-	CCNA_00422	SDR pteridine reductase	19120	0	0	43765	0	0	4	36826388699	15881758911	19	18514	0	34671	0	4	34251791274	25363393777	23	0.53137	1
	433170	433090		-	-	CCNA_03919	hypothetical protein	14753	0	0	33769	0	0	33	19765061684	10672679546	138	0	0	0	0	0	0	244	0	1	1
	433404	433874		+	-	CCNA_00423	phosphohydrolase, MutT-nudix family	25830	14251	11749	59125	49504	68351	19	3452913202	292408670470	125	6450	0	12079	0	2	2726706314	2964780859	12	7.24091e-05	0.00114648
	434121	435560		+	-	CCNA_00424	aldehyde dehydrogenase	351309	214736	515350	804149	745947	2998138	136	457529649971384	785397049108393	1052	309015	92820	578701	1521389	56	94895835572379	155776454372244	729	0.57422	1
	436094	435633		-	-	CCNA_00425	hypothetical protein	109705	0	1300	251115	0	7562	43	2353427949280	633239043614	186	36402	0	68171	0	15	173541441529	76226609842	73	0.646839	1
	436545	436889		+	-	CCNA_00426	very-short-patch-repair endonuclease	15466	40293	11781	35401	139969	68538	35	222267952887	563879343345	235	20697	21449	38759	351565	24	6720849721085	2963137084210	565	0.659617	1
	436958	437146		+	-	CCNA_00427	hypothetical protein	22758	0	2459	52093	0	14305	24	42850484713	32504729650	117	97503	5579	182596	91444	110	348500086535	1385256161668	724	0.0127407	0.137324
	437146	437328		+	-	CCNA_00428	conserved hypothetical protein	1564	0	1575	3580	0	9162	3	623065793	1946469775	23	6128	0	11476	0	6	2411355822	2648936909	31	0.567727	1
	437383	437550		+	-	CCNA_00429	hypothetical protein	650	0	3351	1487	0	19495	4	4843877161	4680363049	41	0	0	0	0	0	0	244	0	1	1
	437741	437556		-	-	CCNA_00430	hypothetical protein	1200	7352	0	2746	25539	0	8	8957122016	7770014844	50	100	0	187	0	0	123366	250640	0	0	0
	437761	437883		+	-	CCNA_00431	hypothetical protein	0	0	0	0	0	0	0	0	356	0	0	0	0	0	0	0	244	0	1	1
	438650	438156		-	-	CCNA_00432	AsnC-family transcriptional regulator	7549	6242	3950	17279	21683	22979	6	219216982	28411594477	41	7450	0	13951	0	3	3853158026	4679513178	14	0.693867	1
	438748	439005		+	-	CCNA_00433	type 1 capsular polysaccharide biosynthesis protein J	19093	13260	2181	43704	46062	12688	24	17710842629	76114654948	132	11250	0	21068	0	8	10362390358	10758187585	40	0.704772	1
	439068	440003		+	-	CCNA_00434	conserved membrane-spanning protein	103993	0	2550	238041	0	14835	20	1995436200809	605721059036	90	25047	2600	46906	42615	5	227459703	128505330138	47	0.606578	1
	440156	441607		+	-	CCNA_00435	amino acid transporter	13098	6500	8450	29981	22579	49159	3	8501370335	74878634242	23	21749	1900	40729	31142	3	1566038939	84697837733	24	0.510623	1
	441717	442865		+	-	CCNA_00436	acyl-CoA dehydrogenase, short-chain specific	11649	0	300	26664	0	1745	1	10394042700	7827712678	8	0	2150	0	35240	0	35616411844	25956807391	15	0.620429	1
	443064	444677		+	-	CCNA_00437	methyl-accepting chemotaxis protein	1127	0	3000	2579	0	17453	0	3449820344	4385877493	4	0	0	0	0	0	0	244	0	1	1
	445200	444889		-	-	CCNA_00438	hypothetical protein	10621	0	0	24311	0	0	6	8982170034	5951001355	25	0	0	0	0	0	0	244	0	1	1
	445497	447518		+	-	CCNA_00439	methyl-accepting chemotaxis protein	29402	14246	245	67301	49487	1425	3	75486470501	107297545736	19	0	4650	0	76217	0	226823708213	95581940030	18	0.504998	1
	447518	447805		+	-	CCNA_00440	STAS domain protein	0	0	0	0	0	0	0	0	356	0	7100	0	13296	0	5	3433162978	3971925724	23	1	1
	447802	448167		+	cheYI	CCNA_00441	chemotaxis receiver domain protein cheYI	4900	0	1881	11216	0	10943	3	1363138964	5056294798	20	0	0	0	0	0	0	244	0	1	1
	448237	450525		+	cheAI	CCNA_00442	chemotaxis histidine kinase protein cheAI	14351	27201	7099	32849	94490	41299	3	72032988229	264939837569	24	27295	2400	51116	39337	2	2566990262	130791919398	19	0.534416	1
	450529	450996		+	-	CCNA_00443	chemotaxis protein cheW	14250	0	0	32618	0	0	5	18186623807	10036287469	23	0	0	0	0	0	0	244	0	1	1
	450996	451877		+	-	CCNA_00444	chemotaxis protein methyltransferase	171579	0	1100	392746	0	6399	35	6996845601045	1772044721466	150	46025	0	86192	0	10	304708595159	120369222272	48	0.674387	1
	451877	452911		+	-	CCNA_00445	receiver domain-glutamate methylesterase cheBI	30371	2750	0	69519	9552	0	5	96107350488	45413207028	25	76561	2151	143378	35256	15	524998151705	554346832186	86	0.862073	1
	452915	453304		+	-	CCNA_00446	chemotaxis receiver domain protein cheYII	7600	0	50	17396	0	290	3	3943839192	3678051740	15	27748	1900	51964	31142	15	10074369286	112833215041	106	0.0230177	0.23046
	453301	453864		+	cheD	CCNA_00447	chemotaxis protein cheD	1250	6850	3099	2861	23795	18028	3	4802561232	16393767528	26	0	2550	0	41796	0	53639822791	32882275636	37	0.564534	1
	453868	454251		+	cheU	CCNA_00448	cheU protein	0	0	0	0	0	0	0	0	356	0	0	1950	0	31961	1	28174282674	22491684270	41	1	1
	454259	454861		+	cheYIII	CCNA_00449	cheYIII	0	0	0	0	0	0	0	0	356	0	8249	0	15448	0	2	4921046072	6004906745	12	1	1
	454858	455328		+	cheE	CCNA_00450	cheE protein	0	0	0	0	0	0	0	0	356	0	0	0	0	0	0	0	244	0	1	1
	455598	458639		+	-	CCNA_00451	TonB-dependent receptor	42549	5450	0	97395	18932	0	2	204731004981	102992936063	12	30848	2050	57769	33601	2	14405943748	133057355316	15	0.533202	1
	459857	458721		-	-	CCNA_00452	N-acetylglucosamine-6-phosphate deacetylase	6377	0	50	14597	0	290	1	2578926360	2650077522	4	0	0	0	0	0	0	244	0	1	1
	460948	459857		-	-	CCNA_00453	glucosamine-6-phosphate deaminase	3719	0	0	8512	0	0	0	723652993	844893323	2	0	0	0	0	0	0	244	0	1	1
	461789	460977		-	-	CCNA_00454	GntR-family transcriptional regulator	37933	16399	7200	86829	56966	41887	13	28997540746	321390451306	76	25589	2350	47921	38518	6	1494870108	120969886568	53	0.561187	1
	461868	461800		-	-	CCNA_03920	hypothetical protein	312	0	0	714	0	0	0	1889427	2583882	3	0	0	0	0	0	0	244	0	1	1
	461992	464661		+	nagA	CCNA_00455	N-acetyl-glucosamine/N-acetyl-chitin oligosaccharide outer membrane transporter nagA	31802	18850	2850	72795	65480	16580	3	58142656350	220004110955	19	110603	80257	207129	1315472	14	139952945677345	69819332722827	285	7.07207e-11	1.75087e-09
464754			464843	+	-	CCNA_R0006	antisense sRNA	252	0	0	576	0	0	0	1128413	1669202	2	0	0	0	0	0	0	244	0	1	1
	464819	467092		+	-	CCNA_00456	beta-N-acetylhexosaminidase	4400	12750	7698	10071	44290	44784	1	20762177780	70721315485	14	17600	2950	32960	48352	1	4878340796	108431236822	17	0.538356	1
	467106	469664		+	-	CCNA_00457	phosphoenolpyruvate-protein phosphotransferase/phosphocarrier protein HPr/PTS system,	5850	2650	3500	13390	9205	20361	0	1005243739	15437643529	5	15600	50	29214	819	1	21210187175	20356948832	5	0.505059	1
	469661	471415		+	-	CCNA_00458	PTS system, N-acetylglucosamine-specific IIBC component	4550	3000	5299	10414	10421	30827	1	5902720502	20706793415	9	0	0	0	0	0	0	244	0	1	1
	471542	472783		+	nhaA	CCNA_00459	Na+/H+ antiporter nhaA	18639	12651	8311	42664	43946	48350	5	218257259	155738947461	36	50	50	93	819	0	3198982	11440899	0	0	0
472905			472973	+	-	CCNA_R0108	small non-coding RNA	10863	19957	36935	24865	69326	214875	178	985319902559	901801276588	1493	5696	0	10667	0	16	2023324395	2243302003	77	3.43787e-20	1.1058e-18
	473245	473400		+	-	CCNA_00460	hypothetical protein	0	0	0	0	0	0	0	0	356	0	0	0	0	0	0	0	244	0	1	1
	474254	474409		+	-	CCNA_03921	UDP-glucose 6-dehydrogenase related protein	0	0	0	0	0	0	0	0	356	0	0	0	0	0	0	0	244	0	1	1
	475532	476800		+	-	CCNA_03998	GT1/WbuB-like N-acetyl-L-fucosamine transferase	0	0	0	0	0	0	0	0	356	0	0	0	0	0	0	0	244	0	1	1
	477514	477678		+	-	CCNA_00464	Undecaprenyl-phosphate sugar phosphotransferase-related protein	0	0	0	0	0	0	0	0	356	0	0	0	0	0	0	0	244	0	1	1
	477921	479033		+	-	CCNA_00465	UDP-galactopyranose mutase	0	0	0	0	0	0	0	0	356	0	0	0	0	0	0	0	244	0	1	1
	479191	480435		+	-	CCNA_00466	glycosyltransferase	0	0	0	0	0	0	0	0	356	0	0	0	0	0	0	0	244	0	1	1
	480439	481710		+	-	CCNA_00467	oligosaccharide translocase/flippase	0	0	0	0	0	0	0	0	356	0	0	0	0	0	0	0	244	0	1	1
	481933	481820		-	-	CCNA_00468	UDP glucuronic acid epimerase-related protein	0	0	0	0	0	0	0	0	356	0	0	0	0	0	0	0	244	0	1	1
	483454	482231		-	-	CCNA_00469	GT1-family glycosyltransferase	0	0	0	0	0	0	0	0	356	0	0	0	0	0	0	0	244	0	1	1
	483798	484859		+	-	CCNA_03922	hypothetical protein	0	0	0	0	0	0	0	0	356	0	0	0	0	0	0	0	244	0	1	1
	486132	484789		-	-	CCNA_00470	O-antigen polymerase	0	0	0	0	0	0	0	0	356	0	0	0	0	0	0	0	244	0	1	1
	487127	486159		-	-	CCNA_00471	GDP-L-fucose synthase	0	0	0	0	0	0	0	0	356	0	0	0	0	0	0	0	244	0	1	1
	488169	487093		-	-	CCNA_00472	GDP-mannose 4,6 dehydratase	0	0	0	0	0	0	0	0	356	0	0	0	0	0	0	0	244	0	1	1
	488768	488274		-	-	CCNA_00473	hypothetical protein	0	0	0	0	0	0	0	0	356	0	0	0	0	0	0	0	244	0	1	1
	491578	488768		-	trwC	CCNA_00474	DNA relaxase/conjugal transfer nickase-helicase trwC	0	0	0	0	0	0	0	0	356	0	0	0	0	0	0	0	244	0	1	1
	493329	491512		-	trwB	CCNA_00475	bacterial conjugation protein, ATP binding domain trwB	0	0	0	0	0	0	0	0	356	0	0	0	0	0	0	0	244	0	1	1
	493709	493326		-	-	CCNA_00476	hypothetical protein	0	0	0	0	0	0	0	0	356	0	0	0	0	0	0	0	244	0	1	1
	494284	494090		-	-	CCNA_00477	excisionase	0	0	0	0	0	0	0	0	356	0	0	0	0	0	0	0	244	0	1	1
	495143	494406		-	-	CCNA_00478	hypothetical protein	0	0	0	0	0	0	0	0	356	0	0	0	0	0	0	0	244	0	1	1
	495332	495655		+	-	CCNA_00479	Helix-turn-helix DNA-binding protein	0	0	0	0	0	0	0	0	356	0	0	0	0	0	0	0	244	0	1	1
	497022	495724		-	-	CCNA_00480	bacteriophage P4 integrase	0	0	0	0	0	0	0	0	356	0	0	0	0	0	0	0	244	0	1	1
	497352	497597		+	-	CCNA_00481	HipB transcriptional regulator	0	0	0	0	0	0	0	0	356	0	0	0	0	0	0	0	244	0	1	1
	497584	498855		+	-	CCNA_00482	toxin protein module HipA	0	0	0	0	0	0	0	0	356	0	0	0	0	0	0	0	244	0	1	1
499174			499085	-	-	CCNA_R0007	tRNA-Ser	336396	85505	3079	770013	297026	17912	856	24660849883722	24723967740138	4018	287830	41264	539027	676348	741	931821448974	42322444651161	6752	0.619709	1
	500224	499379		-	-	CCNA_00483	Zn-dependent hydrolase, glyoxalase II family	28210	2132	2083	64572	7406	12118	6	63620758763	50583259684	33	12321	1956	23073	32060	3	1341032773	51195725744	32	0.495578	1
	501015	500314		-	-	CCNA_00484	hypothetical protein	374945	270613	370896	858253	940052	2157752	262	117174475656168	548104129517694	1878	234518	15686	439188	257105	72	1834047442785	12021713294899	495	0.712122	1
	502142	501114		-	-	CCNA_00485	ribosomal large subunit pseudouridine synthase D	7232	0	2750	16554	0	15998	1	3432613100	9998241964	10	19500	0	36518	0	3	38795447654	27285007549	17	0.602339	1
	502235	504724		+	-	CCNA_00486	TonB-dependent receptor	18150	0	2450	41545	0	14253	1	23922683909	23630159614	7	0	2000	0	32781	0	29940378093	23376702940	6	0.530383	1
	504911	506605		+	-	CCNA_00487	alkaline phosphatase	16314	8150	8614	37342	28311	50113	3	4954574412	101756312962	22	31850	5500	59646	90149	4	25187562267	352440462670	44	0.618643	1
	507341	506715		-	-	CCNA_00488	amino acid efflux permease	1656	46	0	3790	159	0	0	98811963	127499538	2	0	1651	0	27061	0	18896841700	17094465819	21	8.51112e-06	0.000152491
	507747	507328		-	-	CCNA_00489	phosphoribosyl-AMP cyclohydrolase	3061	18	2350	7006	62	13671	2	1580461540	4604504465	16	0	0	0	0	0	0	244	0	1	1
	507838	508722		+	-	CCNA_00490	conserved hypothetical membrane protein	22948	0	1550	52528	0	9017	5	47474438662	28063026539	23	6651	1350	12455	22127	1	1599569431	25272838965	19	0.53977	1
	509508	508870		-	-	CCNA_00491	GTP cyclohydrolase I	755644	237591	280198	1729677	825341	1630100	361	46655391430793	635028180838714	2183	1596583	489506	2989967	8023373	662	5287284931517220	8352118659741660	8617	0.775244	1
	509704	511095		+	-	CCNA_00492	cysteinyl-tRNA synthetase	48100	14800	1766	110101	51412	10274	8	191014135586	275306915171	41	31473	3750	58940	61465	5	63707623	218001136204	43	0.480913	1
	511098	511559		+	-	CCNA_00493	putative polyketide cyclase-dehydrase/lipid transport protein	6400	0	2950	14649	0	17162	3	3317683008	9587130407	22	14147	0	26493	0	6	17958859000	16486773200	28	0.543303	1
	511566	512027		+	-	CCNA_00494	transport protein	108947	5050	150	249380	17542	872	44	2200858578372	677291234926	193	19098	0	35765	0	8	36903176989	26498605644	38	0.173088	1
	512080	512334		+	-	CCNA_00495	putative membrane protein insertion efficiency factor YidD	31203	0	0	71423	0	0	22	119306994615	37502661080	93	8873	0	16616	0	7	5861753692	6722662872	32	0.692245	1
	512331	514298		+	-	CCNA_00496	threonyl-tRNA synthetase	133043	1500	11487	304536	5210	66827	13	3000367626552	1515485121008	63	145389	12449	272274	204048	16	173877660826	4753768403474	121	0.627768	1
	514298	515224		+	-	CCNA_00497	putative rhamnosyl transferase	38383	8974	31437	87859	31173	182890	15	528433571086	859467585957	108	38018	1500	71197	24586	8	69684504219	144217301007	51	0.620581	1
	515404	515285		-	-	CCNA_00498	hypothetical protein	50	0	165	114	0	959	0	3358596	7432082	2	0	1450	0	23766	2	13837531671	13577327594	99	1.00327e-90	5.18782e-89
	515845	515480		-	-	CCNA_00499	hypothetical protein	0	0	0	0	0	0	0	0	356	0	0	0	0	0	0	0	244	0	1	1
	516741	515842		-	-	CCNA_00500	hydroxymethylglutaryl-CoA lyase	21652	0	11800	49561	0	68648	6	82906909795	107292471645	43	26650	0	49908	0	6	82105529194	42636646662	27	0.584528	1
	518417	516738		-	-	CCNA_00501	glucosyltransferase	22850	35647	41744	52303	123830	242852	10	912486422156	2019147979664	83	16452	0	30810	0	1	25800259917	21216881217	9	0.000578341	0.00806322
	518474	519211		+	-	CCNA_00502	glycosyl transferase family protein	5264	0	0	12049	0	0	1	1666237487	1743345440	5	0	0	0	0	0	0	244	0	1	1
	519310	519732		+	-	CCNA_00503	conserved hypothetical protein	3431	0	0	7853	0	0	1	596403172	699678524	6	0	1300	0	21307	0	10646761867	11002103295	25	0.725459	1
	520193	519729		-	-	CCNA_00504	23S rRNA methyltransferase	14848	50	2150	33987	173	12507	6	14451612312	17561146391	33	13149	0	24624	0	5	15066925857	14486135927	26	0.553523	1
	520398	520949		+	-	CCNA_00505	ubiquinol-cytochrome c reductase iron-sulfur subunit	21358	962	0	48888	3341	0	7	44386911439	21081265495	31	7400	2650	13858	43435	3	23391275120	54921221760	51	0.592561	1
	520955	522235		+	-	CCNA_00506	cytochrome b	39329	5149	12840	90024	17886	74698	8	98089791820	311087627672	47	41146	150	77055	2458	6	215424589754	103960207645	31	0.573731	1
	522241	523086		+	-	CCNA_00507	cytochrome c1	10627	0	5285	24325	0	30746	3	12706616232	23102333865	21	50	1800	93	29503	0	23075550153	19874253880	17	0.550046	1
	523927	523154		-	-	CCNA_00508	aspartate protease	14949	0	2749	34218	0	15992	4	14470350091	19769406415	21	20512	3750	38413	61465	6	12860701888	155396318168	64	0.671667	1
	524526	523993		-	-	CCNA_00509	phosphoglycerate mutase family	6852	0	0	15684	0	0	2	3137262764	2921449869	9	0	0	0	0	0	0	244	0	1	1
	525200	524523		-	-	CCNA_00510	carboxymethylenebutenolidase	4800	160	2800	10987	555	16289	2	2333938899	7548727125	13	6649	50	12451	819	2	2490775295	3946833026	9	0.568406	1
	525880	525200		-	-	CCNA_00511	carboxymethylenebutenolidase	7200	3917	0	16480	13606	0	2	2931786629	8676130774	14	0	1800	0	29503	0	23251064239	19772190866	21	0.57616	1
	527045	525945		-	-	CCNA_00512	GTP-binding protein, probable translation factor	18276	0	0	41833	0	0	3	33044571104	14842285059	12	22699	50	42509	819	4	53313912332	34523290828	19	0.584963	1
	527284	527934		+	-	CCNA_03885	Abi superfamily/CAAX amino terminal protease	5548	0	0	12699	0	0	1	1890172106	1925722682	6	0	2800	0	45894	0	67139513864	37384225670	35	0.370867	1
	528078	528908		+	-	CCNA_00514	pirin	19797	27341	21187	45315	94976	123259	14	107328096831	656504997014	105	5698	12399	10670	203228	4	2097547308622	850439785672	128	0.542617	1
	529324	531657		+	-	CCNA_00515	5-methyltetrahydropteroyltriglutamate-- homocysteine methyltransferase	11549	8199	9249	26435	28481	53807	2	10955692683	87275611052	15	9099	0	17039	0	0	6226297299	6997671465	3	0.882593	1
	532432	531683		-	-	CCNA_00516	integral membrane protein	9600	0	0	21974	0	0	2	7047521101	4995634005	9	8750	0	16386	0	2	5668903790	6577191287	10	0.52207	1
	533052	532435		-	-	CCNA_00517	peptidyl-tRNA hydrolase	52111	6850	5200	119282	23795	30251	18	221506230709	280385164132	93	13099	0	24530	0	4	14929254477	14390335250	19	0.709967	1
	533733	533140		-	-	CCNA_00518	LSU ribosomal protein L25P	880370	28289	2122	2015176	98270	12345	278	338493154062216	112896776758739	1192	135847	148	254404	2425	46	3999801515121	1220813333440	216	0.0447336	0.403238
	534967	533891		-	-	CCNA_00519	conserved hypothetical protein	356892	2710	7077	816929	9413	41171	61	38418973880830	13139639526678	268	41175	0	77109	0	7	233247058519	97845883645	35	0.00143492	0.0186676
	536136	535198		-	-	CCNA_00520	ribose-phosphate pyrophosphokinase	79684	55445	16396	182397	192604	95386	29	222135980867	2849795456898	166	532959	79485	998087	1302819	132	6312005287921	196951835318324	1225	0.0233467	0.232943
	536528	536277		-	-	CCNA_00521	antitoxin protein	187508	22844	4736	429207	79355	27552	154	6525267633081	4037095866163	709	184490	4454	345499	73004	152	4826413154733	3499105732358	830	0.457632	1
	536805	536509		-	brnT	CCNA_00522	BrnT-related ribonuclease toxin	301239	6737	5246	689539	23402	30519	191	25030481480957	8672924555168	834	24196	230	45312	3769	16	52863858518	41427951340	82	6.36154e-06	0.000115497
	537638	536853		-	-	CCNA_00523	multicopper polyphenol oxidase	7400	0	15400	16938	0	89592	5	168332202106	83218346278	45	0	0	0	0	0	0	244	0	1	1
	538759	537635		-	-	CCNA_00524	conserved hypothetical cytosolic protein	4818	9449	3100	11028	32823	18034	2	5143742419	28360438675	18	0	0	0	0	0	0	244	0	1	1
	539654	538746		-	-	CCNA_00525	prolipoprotein diacylglyceryl transferase	24435	0	10296	55931	0	59898	6	72439380321	101900499342	42	36149	0	67697	0	8	170659559866	75182477478	37	0.523497	1
	539769	540026		+	-	CCNA_00526	BMFP membrane fusogenic protein	90490	24378	17244	207132	84684	100319	92	377568845044	1690916527481	506	33593	5718	62910	93722	30	25804279614	395020058516	303	0.58556	1
	540157	540663		+	-	CCNA_00527	conserved hypothetical protein	57154	23778	16966	130826	82599	98702	35	34375683028	921318658659	205	56036	5584	104940	91525	24	3507370403	703905302938	193	0.507641	1
	540844	541626		+	-	CCNA_00528	pyrroline-5-carboxylate reductase	16554	21450	7645	37892	74512	44476	10	19825852316	226496510383	66	200	0	374	0	0	651112	1094386	0	0	0
	541695	542231		+	-	CCNA_00529	conserved hypothetical protein	62470	47299	50677	142994	164306	294822	54	624717596127	5337940094714	373	44000	20049	82400	328618	24	3783829192028	3351963902872	382	0.484702	1
	542581	543099		+	-	CCNA_00530	LSU ribosomal protein L10P	108022	0	9509	247263	0	55320	41	1869036449965	863247473916	194	14065	1130	26339	18521	5	959828417	36212425479	43	0.289582	1
	543145	543528		+	-	CCNA_00531	LSU ribosomal protein L12P (L7/L12)	28294	5500	12502	64765	19105	72732	21	50991178548	225599553842	135	35148	2000	65822	32781	19	30513473248	151825645235	128	0.50331	1
	543952	544842		+	-	CCNA_00532	hypothetical protein, RDD superfamily	7100	0	0	16251	0	0	1	3416384250	3154698803	6	0	0	0	0	0	0	244	0	1	1
	546187	544865		-	hfsI	CCNA_00533	secreted polysaccharide polymerase hfsI	20247	0	3563	46345	0	20728	3	30051390364	33154620244	16	0	0	0	0	0	0	244	0	1	1
	546314	547336		+	-	CCNA_00534	conserved hypothetical protein	2582	12600	0	5910	43769	0	2	31734258552	19433649534	16	10	8399	18	137665	1	937139419509	287182456752	67	0.539502	1
	547379	547537		+	-	CCNA_00535	hypothetical protein	9536	36845	21775	21828	127991	126679	77	304361692518	721907683977	579	6136	1000	11491	16390	9	312623687	17988846551	87	0.0244496	0.242419
	547831	551901		+	-	CCNA_00536	DNA-directed RNA polymerase beta chain	323282	110261	79493	739995	383023	462464	22	4516193895921	60347647154481	129	364671	26448	682930	433502	19	3903305070777	34364314151547	137	0.478916	1
	552015	556205		+	-	CCNA_00537	DNA-directed RNA polymerase beta' chain	267104	67811	40282	611403	235561	234347	16	6443967093483	24512778318335	86	367363	13775	687971	225782	18	17152643350656	21092435931814	109	0.439046	1
553828			553414	-	-	CCNA_R0109	small non-coding RNA	8149	0	0	18653	0	0	3	4756104123	3967067806	14	0	0	0	0	0	0	244	0	1	1
	556424	558220		+	-	CCNA_00538	methyl-accepting chemotaxis protein	4100	15999	6601	9384	55577	38402	2	30465350969	77623692513	19	0	7200	0	118013	0	647732438126	209972384195	32	0.598265	1
	559709	558249		-	-	CCNA_00539	salicylate hydroxylase	6628	8505	0	15171	29544	0	1	10157364593	16412322285	10	7497	0	14039	0	1	3911747606	4740240643	4	0.648313	1
	560776	559904		-	-	CCNA_00540	coproporphyrinogen III oxidase	5556	0	0	12717	0	0	1	1896608556	1939236867	4	0	100	0	1639	0	22581546	50905389	0	0.0688988	1
	560972	560907		-	-	CCNA_03923	hypothetical protein	0	0	92	0	0	535	0	945152	1290297	2	0	1619	0	26536	4	18028894843	16535575330	201	0	0
	561036	561344		+	-	CCNA_00541	hypothetical protein	650	0	0	1487	0	0	0	10990091	13488112	1	0	0	0	0	0	0	244	0	1	1
	561664	561341		-	-	CCNA_00542	hypothetical protein	3430	50	4751	7851	173	27639	4	9190914965	11708286380	36	8750	0	16386	0	5	5668903790	6577191287	25	0.579496	1
	562363	561713		-	-	CCNA_00543	methyl-accepting chemotaxis protein	28578	7450	0	65415	25879	0	10	69609895341	59133303648	46	17616	0	32989	0	5	30398346977	23597481122	25	0.623023	1
	562579	563754		+	-	CCNA_00544	acetyl-CoA acetyltransferase	142368	17109	73328	325881	59433	426598	35	4649849987955	10983870058285	230	298146	23549	558346	385985	55	1607746665308	22881851193663	401	0.623369	1
564505			563800	-	-	CCNA_R0110	small non-coding RNA	254313	2150	0	582125	7468	0	65	18065555307453	5084082542953	278	38899	3041	72847	49844	12	12795190517	225731018078	86	0.828343	1
	563825	564547		+	-	CCNA_00545	acetoacetyl-CoA reductase	118172	102443	133134	270496	355865	774530	88	10822836190337	45060978519618	645	226567	239583	424298	3926946	130	2214703505144880	905957569989375	3009	0.777893	1
	564671	565453		+	-	CCNA_00546	conserved hypothetical protein	570092	15577	14300	1304946	54111	83192	139	111882811532844	48219596841247	613	305639	1850	572379	30322	79	25146173193619	8536270732224	384	0.586888	1
	565748	565879		+	-	CCNA_00547	PurR-family transcriptional regulator	4039	0	0	9245	0	0	5	882330117	1027108282	23	5530	50	10356	819	8	1546508421	2480219736	42	0.624763	1
	565904	566170		+	-	CCNA_00548	transposase, HTH-Tnp1 superfamily	2908	4249	8608	6656	14760	50078	10	29658904581	37579025601	89	6094	625	11412	10244	5	10014443	11374166475	40	0.655958	1
	566164	567090		+	-	CCNA_00549	transposase, IS2 family	13893	9350	2350	31801	32479	13671	5	4649915815	44262079469	28	12249	886	22939	14522	2	1145886486	28274211548	20	0.569029	1
	567006	568052		+	-	CCNA_00550	LacI-family transcriptional regulator	5799	0	2100	13273	0	12217	1	1918432695	6463121238	8	9299	0	17414	0	1	6560251685	7254142454	8	0.503608	1
	568700	568260		-	-	CCNA_00551	hypothetical protein	1350	0	0	3090	0	0	0	63585024	69273721	2	0	0	0	0	0	0	244	0	1	1
	569426	568956		-	-	CCNA_00552	cupin superfamily protein	0	0	2532	0	0	14730	0	2698615973	2601130777	10	0	0	0	0	0	0	244	0	1	1
	570172	569423		-	-	CCNA_00553	hydroxyacylglutathione hydrolase	6650	0	50	15221	0	290	1	2854209244	2858258112	6	50	0	93	0	0	23077	-5668	0	1	1
	570238	571044		+	-	CCNA_00554	methyltransferase	13931	16197	8062	31888	56264	46902	8	6538749084	156048210972	55	9	1802	16	29536	0	23283231312	19827383505	18	0.691933	1
	571117	571461		+	glnC	CCNA_00555	nitrogen regulatory protein P-II	21920	35447	74297	50175	123135	432235	69	5458939854731	5407251929442	585	26597	1800	49808	29503	16	9484429040	103453948826	114	0.0534291	0.465369
	571546	573063		+	-	CCNA_00556	phospholipase D	29267	10900	46250	66992	37864	269067	10	1738765372203	1486880962581	82	13651	0	25564	0	1	16484400083	15488274109	8	0.000257521	0.00382536
	573799	573020		-	-	CCNA_00557	endonuclease/exonuclease/phosphatase family protein	20940	24838	27018	47931	86282	157181	16	242624454858	801869620241	124	31549	3894	59082	63825	9	289262095	226478992120	78	0.574521	1
	574461	573796		-	-	CCNA_00558	methyltransferase	0	0	50	0	0	290	0	217381	316015	0	7599	5156	14230	84510	3	186706832851	152211813406	74	0	0
	575737	574589		-	-	CCNA_00559	homoserine O-acetyltransferase	13200	0	0	30214	0	0	2	15134017557	8742850871	8	0	0	0	0	0	0	244	0	1	1
	575815	576327		+	sixA	CCNA_00560	phosphohistidine phosphatase SixA	0	0	0	0	0	0	0	0	356	0	0	0	0	0	0	0	244	0	1	1
	576324	576668		+	-	CCNA_00561	conserved hypothetical cytosolic protein	1976	0	6478	4523	0	37686	4	22496593372	15039465176	40	0	0	0	0	0	0	244	0	1	1
	576665	577723		+	-	CCNA_00562	dihydroorotate dehydrogenase	14730	4550	7520	33717	15805	43748	4	9166884491	61832093966	29	19649	50	36797	819	3	37432845960	28439895803	17	0.600891	1
	577720	578457		+	-	CCNA_00563	SNARE-associated family membrane protein	12849	0	0	29411	0	0	3	14186589240	8331732548	13	1832	0	3430	0	0	132883143	241743794	2	0.0465629	1
	578467	579972		+	cenK	CCNA_00564	sensory transduction protein kinase CenK	11648	0	0	26662	0	0	1	11209778504	7001643015	5	19498	0	36514	0	2	38785249731	27280591356	12	0.6382	1
	581778	580036		-	-	CCNA_00565	gamma-glutamyltranspeptidase	15963	0	11300	36539	0	65739	2	69576730992	75814762687	19	17000	300	31836	4917	2	18659732770	27530596343	10	0.620916	1
582032			582108	+	-	CCNA_R0008	tRNA-Arg	79212	1225	0	181317	4255	0	189	1085487884739	321010178881	803	8091	0	15152	0	21	4697771763	5828989379	98	0.00493937	0.0576496
	583541	582330		-	-	CCNA_00566	mannonate dehydratase	79823	6799	4900	182715	23618	28506	13	786480256396	522626605708	64	35892	3599	67216	58990	6	1084468389	238106824478	52	0.531182	1
	585976	583664		-	-	CCNA_00567	alpha-1,2-mannosidase	7000	100	2749	16023	347	15992	0	3126003939	9890689222	4	22848	6151	42788	100819	2	117909320363	317071046635	31	0.0171096	0.179212
	587111	585948		-	-	CCNA_00568	N-acetylglucosamine-6-phosphate deacetylase	6099	0	0	13960	0	0	0	2372354005	2355472443	3	6100	1100	11423	18029	1	640643717	19717351436	12	0.707061	1
	588187	587111		-	-	CCNA_00569	glucosamine-6-phosphate deaminase	1900	5651	5850	4349	19630	34033	2	10273863307	25279781147	17	13397	2401	25088	39354	2	4065269413	68376737434	29	0.593823	1
	589130	588225		-	-	CCNA_00570	GntR-family transcriptional regulator	15599	7650	0	35706	26574	0	4	17538549475	28715179187	22	0	0	0	0	0	0	244	0	1	1
	589132	591768		+	-	CCNA_00571	phosphoenolpyruvate-protein phosphotransferase/phosphocarrier protein HPr/PTS system,	11799	2900	3599	27008	10073	20937	1	2756418381	25284449281	7	12500	100	23409	1639	0	11210480688	14939224113	4	0.593726	1
	591765	593513		+	-	CCNA_00572	PTS system, N-acetylglucosamine-specific IIBC component	4486	2850	6549	10268	9900	38099	1	12625815458	25476684172	11	0	0	0	0	0	0	244	0	1	1
	593829	596600		+	-	CCNA_00573	TonB-dependent receptor	16397	6950	2600	37532	24142	15125	1	5309136497	43069406044	9	47051	0	88113	0	3	321262456979	125061236435	15	0.59795	1
	596740	599052		+	-	CCNA_00574	alpha-N-acetylglucosaminidase	4350	0	746	9957	0	4339	0	751441041	2451074247	2	13553	1449	25381	23750	1	22317919	41501370390	10	0.592317	1
	599049	600167		+	-	CCNA_00575	conserved hypothetical protein	800	4700	0	1831	16326	0	0	3045814777	3818604965	5	6453	0	12084	0	1	2729415949	2967846332	5	0.494926	1
	600176	601420		+	oppA	CCNA_00576	oligopeptide-binding protein oppA	9800	13896	1550	22432	48271	9017	3	20891383082	46067322928	21	16497	0	30894	0	2	25969401838	21309130022	12	0.611544	1
	601496	604033		+	-	CCNA_00578	family 67 glycosyl hydrolase protein	9352	8000	0	21406	27790	0	1	9801629465	19128968576	6	0	4249	0	69644	0	182677433589	79476472707	13	0.633707	1
	606009	604210		-	-	CCNA_00579	endonuclease	6358	0	6849	14553	0	39845	1	21423668276	22607762755	10	30348	4900	56833	80314	3	13442616799	284620828409	38	0.845428	1
	609290	606207		-	-	CCNA_00580	AAA ATPase domain protein	0	0	0	0	0	0	0	0	356	0	6299	1850	11796	30322	0	7610969621	33222000414	6	1	1
	611065	609287		-	-	CCNA_03886	trypsin-like peptidase domain family protein	17510	0	50	40080	0	290	1	29561329306	14096349050	7	11748	1899	22000	31126	1	1391352330	47830074814	14	0.627421	1
	611200	611757		+	-	CCNA_00582	conserved hypothetical protein	26328	28698	23989	60265	99690	139560	25	108573392887	846074233123	178	26368	2350	49380	38518	10	2113233669	124537112903	78	0.632918	1
	613205	611838		-	-	CCNA_00583	lysozyme family protein	3949	0	0	9039	0	0	0	835879013	972168100	2	0	0	0	0	0	0	244	0	1	1
	613324	614379		+	-	CCNA_00585	hypothetical protein	15166	5417	973	34715	18817	5660	3	9790432429	26171874650	18	4975	868	9316	14227	1	314464676	13342047825	11	0.60944	1
	615746	614415		-	-	CCNA_00586	LytR/AlgR-family transcriptional regulator	3800	6951	6465	8698	24146	37611	2	9659799192	36503019494	17	9650	0	18071	0	1	7170034625	7734824843	6	0.678289	1
	615934	617430		+	-	CCNA_00587	alpha/beta hydrolase family protein	126596	223061	392871	289779	774867	2285595	90	276557829314860	331597086729259	745	46847	7550	87731	123750	7	37535306686	830913230309	70	4.69688e-06	8.72125e-05
	617604	617843		+	-	CCNA_00588	SapA domain protein	2250	0	0	5150	0	0	1	216666557	267408729	7	0	0	0	0	0	0	244	0	1	1
	618567	617851		-	-	CCNA_00589	hypothetical protein	7698	0	0	17620	0	0	1	4148285729	3658408199	8	0	4050	0	66382	1	162811397590	72318875832	46	0.16939	1
	619724	618615		-	-	CCNA_00590	FixC-family flavoprotein dehydrogenase	12680	5950	5449	29024	20669	31700	3	1056634248	47772136162	24	0	50	0	819	0	4272146	8614684	0	0	0
	621791	619728		-	-	CCNA_00591	conserved hypothetical protein	9598	5749	7754	21969	19970	45110	2	8886255715	53849459838	14	21397	4100	40070	67202	2	19016051519	176011096740	25	0.608007	1
	622871	621804		-	-	CCNA_00592	ferritin superfamily protein	15977	0	0	36571	0	0	2	23932215236	12194306505	11	0	2500	0	40976	0	51148741430	32020699184	19	0.601589	1
622892			623341	+	-	CCNA_R0111	small non-coding RNA	0	0	0	0	0	0	0	0	356	0	0	0	0	0	0	0	244	0	1	1
	624517	622934		-	-	CCNA_00593	conserved hypothetical protein	13409	0	2500	30693	0	14544	1	11140308888	16712238294	9	18102	3950	33900	64743	2	25866631674	151937511656	31	0.682066	1
	626342	624522		-	-	CCNA_00594	conserved hypothetical protein	67701	0	100	154968	0	581	6	762228450449	222213690867	28	73732	7274	138080	119226	9	7938389644	1225414163588	70	0.662746	1
626656			626908	+	-	CCNA_R0112	small non-coding RNA	30908	0	5399	70748	0	31409	26	82988897423	75608944990	134	0	0	0	0	0	0	244	0	1	1
	627888	626899		-	-	CCNA_00595	FecR family protein	990	0	2400	2266	0	13962	0	1991458035	3146412950	5	6649	0	12451	0	1	2932609033	3194003540	6	0.532905	1
	628364	627846		-	-	CCNA_00596	RpoE-family sigma factor	2029	0	0	4644	0	0	0	169042458	204270069	2	0	0	0	0	0	0	244	0	1	1
	628523	631663		+	-	CCNA_00597	TonB-dependent receptor	0	0	0	0	0	0	0	0	356	0	0	0	0	0	0	0	244	0	1	1
	634816	631886		-	-	CCNA_00598	TonB-dependent receptor	172892	3950	12501	395751	13721	72726	11	5643575697532	3058271985213	54	338383	3550	633699	58187	23	29033174587447	11853287295326	118	0.655528	1
	635047	635673		+	-	CCNA_03887	conserved hypothetical protein	80193	107434	117176	183562	373203	681691	88	9139962187137	33923020775795	658	13188	0	24697	0	4	15174349765	14561690358	19	8.70846e-57	3.95268e-55
	635661	636890		+	-	CCNA_00600	conserved hypothetical protein	7650	0	3450	17510	0	20070	1	4921347076	12713275989	10	6950	0	13015	0	1	3261594920	3672673540	5	0.626467	1
	636877	637848		+	-	CCNA_00601	MoxR-like ATPase	5550	0	0	12704	0	0	1	1891958757	1932586750	4	15051	100	28186	1639	3	18046836573	20126483381	15	0.716079	1
	637845	639158		+	-	CCNA_00602	von Willebrand factor type A domain protein	1500	6400	2450	3433	22232	14253	1	3462612420	13872283962	10	5000	0	9363	0	0	1479653641	1685995272	3	0.672311	1
	639155	640153		+	-	CCNA_00603	integral membrane protein	25749	30139	39451	58939	104696	229513	17	741587432828	1701952846626	131	0	450	0	7375	0	834435695	1014903520	3	4.50405e-83	2.19036e-81
	640131	641012		+	-	CCNA_00604	RDD family membrane protein	37751	50	2250	86412	173	13089	8	159278878274	71573383122	37	129286	0	242117	0	29	3634332744109	1082586612175	137	0.872547	1
	641910	641122		-	-	CCNA_00605	conserved hypothetical membrane protein	20951	5150	4363	47957	17890	25382	7	11666031293	59043751232	38	15350	0	28746	0	3	21844887687	18934695019	18	0.647222	1
	642577	645570		+	-	CCNA_00607	TonB-dependent receptor	38486	1999	6149	88094	6944	35772	2	118626423246	142335469152	14	95298	2900	178467	47533	6	831169983276	947312407579	37	0.660954	1
	645702	647285		+	-	CCNA_00608	endopygalactorunase	5451	0	4450	12477	0	25888	1	7399297365	13106147723	8	0	0	0	0	0	0	244	0	1	1
	647369	648415		+	-	CCNA_00609	PurR-family transcriptional regulator	8523	5450	2850	19509	18932	16580	2	45481927	23063938382	17	0	0	0	0	0	0	244	0	1	1
	648428	651031		+	-	CCNA_00610	alpha-1,2-mannosidase	23098	13849	7401	52871	48108	43056	3	721465128	185361593988	18	66699	4250	124909	69660	5	104795496012	687428569858	37	0.632186	1
	651343	652815		+	-	CCNA_00611	beta-lactamase	11797	6999	0	27003	24313	0	2	10324471188	20478797787	11	19753	50	36992	819	2	37921619276	28646975869	12	0.516134	1
	654179	653295		-	-	CCNA_00612	L-asparaginase	0	7250	0	0	25184	0	1	9775833622	6331400766	9	0	0	0	0	0	0	244	0	1	1
	655519	654176		-	-	CCNA_00613	cyanophycinase	150	0	0	343	0	0	0	325204	445863	0	0	0	0	0	0	0	244	0	0	1
	656883	655396		-	-	CCNA_00614	short-chain fatty acids transporter	1150	0	0	2632	0	0	0	43265382	47903267	0	0	1200	0	19668	0	8785945081	9311350814	6	6.2098e-08	1
	659863	656945		-	-	CCNA_00615	TonB-dependent receptor	19798	3650	0	45317	12679	0	1	30563830014	25268112734	6	13997	0	26212	0	0	17505091592	16188776022	4	0.58469	1
	660031	659960		-	-	CCNA_03924	hypothetical protein	70044	2623	1443	160331	9111	8394	186	726095076644	295246250426	823	4510	0	8446	0	12	1155384641	1345379191	58	1.27629e-10	3.12194e-09
	660612	660157		-	-	CCNA_00616	Lrp-family transcriptional regulator	1134	0	0	2595	0	0	0	41820013	45138795	1	0	0	0	0	0	0	244	0	1	1
	660731	661774		+	-	CCNA_00617	arginine N-succinyltransferase, beta chain	23418	0	0	53604	0	0	4	59913924910	22034071496	17	15479	0	28987	0	3	22287012418	19199400227	13	0.548731	1
	661761	663179		+	-	CCNA_00618	succinylglutamic semialdehyde dehydrogenase	7359	0	0	16844	0	0	0	3723257359	3376014991	3	8000	1850	14981	30322	1	4839637300	36707580357	15	0.728259	1
	663176	664456		+	-	CCNA_00619	succinylarginine dihydrolase	2600	0	0	5951	0	0	0	306528178	378965570	1	50	0	93	0	0	23077	-5668	0	1	1
	664466	665644		+	-	CCNA_00620	acetylornithine aminotransferase/succinyldiaminopimelate aminotransferase	1450	11200	0	3319	38906	0	1	25185701280	15049041799	11	50	2000	93	32781	0	29736924040	23475992446	13	0.527825	1
	666601	666047		-	-	CCNA_00621	conserved domain hypothetical protein	1060	2551	0	2426	8861	0	1	610780357	1537370169	6	0	153	0	2507	0	62623089	137204840	2	0.68469	1
	666621	666806		+	-	CCNA_00622	hypothetical protein	6800	0	0	15565	0	0	6	3080437432	2880666015	27	0	0	0	0	0	0	244	0	1	1
	666944	669151		+	-	CCNA_00623	PAS-family sensor histidine kinase	19084	0	2150	43683	0	12507	1	27866273000	23922587242	8	4600	0	8614	0	0	1211311072	1406535844	1	0.513857	1
	668223	667900		-	-	CCNA_03925	hypothetical protein	13464	0	3600	30819	0	20943	9	11820216306	20769877880	53	7800	0	14607	0	4	4302396958	5333914770	22	0.666916	1
	670396	669233		-	-	CCNA_00624	hypothetical protein with pentapeptide repeats	124	0	2200	283	0	12798	0	1875869284	2061085749	3	0	0	0	0	0	0	244	0	1	1
	670498	670875		+	-	CCNA_00625	two-component receiver domain protein	1150	0	0	2632	0	0	0	43265382	47903267	2	0	0	0	0	0	0	244	0	1	1
	672842	670929		-	-	CCNA_00626	methyl-accepting chemotaxis protein	50	0	50	114	0	290	0	156739	735429	0	5600	4800	10487	78675	1	173645323293	127626935592	23	0	0
	673382	672921		-	-	CCNA_00627	hypothetical protein	0	0	0	0	0	0	0	0	356	0	0	0	0	0	0	0	244	0	1	1
	673771	673388		-	cheY	CCNA_00628	chemotaxis protein cheY	2389	0	0	5468	0	0	1	250174444	313755871	4	0	0	0	0	0	0	244	0	1	1
	674363	676249		+	-	CCNA_00629	methyl-accepting chemotaxis protein	24450	8250	2450	55966	28658	14253	3	24129140038	70283964106	17	10050	0	18820	0	1	7904075700	8459969530	4	0.711088	1
	676286	678580		+	cheAII	CCNA_00630	chemotaxis histidine kinase protein cheAII	10349	7550	8097	23688	26227	47105	2	7266839487	67370946860	14	15032	50	28150	819	1	19352508152	19179574493	6	0.655372	1
	678577	679029		+	cheW	CCNA_00631	chemotaxis protein cheW	0	0	0	0	0	0	0	0	356	0	1104	0	2067	0	0	39407716	86901558	2	1	1
	679026	679394		+	-	CCNA_00632	chemotaxis receiver domain protein CheYII	250	0	0	572	0	0	0	1109706	1543114	0	0	0	0	0	0	0	244	0	1	1
	679391	680467		+	cheBII	CCNA_00633	receiver domain-glutamate methylesterase CheBII	990	0	0	2266	0	0	0	30204953	33579183	0	0	0	0	0	0	0	244	0	1	1
	680464	681294		+	-	CCNA_00634	chemotaxis protein methyltransferase	21765	0	0	49820	0	0	4	50260109499	19522986839	19	0	1901	0	31158	0	26505193575	21603808910	18	0.481088	1
	682056	683531		+	-	CCNA_00635	CHASE2 membrane receptor	32136	1224	50	73559	4251	290	4	119098567690	44417668244	17	21100	0	39514	0	2	46877710692	30472532496	13	0.55793	1
	683537	684388		+	-	CCNA_00636	hypothetical protein	11150	5946	0	25522	20655	0	3	8254474078	17264975641	18	7051	0	13204	0	1	3376426053	3908950201	7	0.658382	1
684508			684418	-	-	CCNA_R0113	small non-coding RNA	0	0	0	0	0	0	0	0	356	0	0	0	0	0	0	0	244	0	1	1
	687454	684440		-	-	CCNA_00637	tetratricopeptide repeat family protein	31109	14249	3549	71208	49498	20646	2	37167279778	176403923278	15	16649	2950	31179	48352	1	6344462208	104006102385	13	0.527479	1
	690129	687421		-	-	CCNA_00638	heme:hemopexin-binding protein	68237	118189	88845	156195	410563	516871	18	4396336923226	24647205053332	133	7317	150	13702	2458	0	2296011261	6436620891	2	1.2083e-106	6.32808e-105
	691751	690126		-	-	CCNA_00639	heme:hemopexin-binding protein	22730	50	0	52029	173	0	2	55553786678	21062474740	10	10609	0	19867	0	1	9000808188	9511254331	6	0.616839	1
691049			691611	+	-	CCNA_R0114	small non-coding RNA	11350	0	3650	25980	0	21234	4	8675922206	17898841798	27	0	1400	0	22947	0	12720559207	12736439341	20	0.570357	1
	692172	691897		-	-	CCNA_00640	hypothetical protein	958	0	0	2192	0	0	0	27891510	31507680	2	0	0	0	0	0	0	244	0	1	1
	692672	692376		-	-	CCNA_00641	hypothetical protein	0	0	231	0	0	1343	0	8606716	10855066	1	0	2048	0	33568	1	31694589029	24212968077	56	9.07918e-128	5.29835e-126
	692899	692642		-	-	CCNA_00642	hypothetical protein	3204	0	336	7333	0	1954	2	389750176	1036996071	11	0	0	0	0	0	0	244	0	1	1
	693356	693502		+	-	CCNA_00643	hypothetical protein	0	0	0	0	0	0	0	0	356	0	0	0	0	0	0	0	244	0	1	1
	694013	695422		+	-	CCNA_00644	conserved hypothetical protein	0	0	0	0	0	0	0	0	356	0	0	0	0	0	0	0	244	0	1	1
	695435	696727		+	nrtA	CCNA_00645	nitrate binding protein nrtA	47231	20	6900	108112	69	40141	7	234215848425	199177254811	38	32250	2250	60395	36879	5	13490756041	148179895721	37	0.495653	1
	696739	697629		+	nrtB	CCNA_00646	nitrate transport permease protein nrtB	2657	136	7650	6081	472	44505	2	32442418773	20313805426	19	0	0	0	0	0	0	244	0	1	1
	697642	698427		+	nrtD	CCNA_00647	nitrate transport ATP-binding protein nrtD	2999	3650	0	6864	12679	0	1	1336964189	4236530478	8	5300	0	9925	0	1	1701834202	1912012904	6	0.549036	1
	698432	699154		+	nasT	CCNA_00648	nitrate response regulator NasT	0	0	0	0	0	0	0	0	356	0	12451	100	23317	1639	3	11097115695	14841244643	17	1	1
	699198	700292		+	-	CCNA_00649	ABC family transporter protein	1649	0	0	3774	0	0	0	102749340	114522108	1	0	100	0	1639	0	22581546	50905389	0	0.583	1
	700527	701747		+	narK	CCNA_00650	MFS superfamily nitrate/nitrite transporter NarK	0	0	0	0	0	0	0	0	356	0	4050	0	7584	0	0	892318677	1078615445	3	1	1
	701776	704244		+	nirB	CCNA_00651	nitrite reductase (NAD(P)H) catalytic subunit	3552	0	0	8130	0	0	0	648144445	763950288	1	50	2850	93	46713	0	69716801037	38463854975	9	0.0028096	1
	704241	704585		+	nasE	CCNA_00652	nitrite reductase (NAD(P)H) small subunit	0	0	500	0	0	2908	0	54964337	60280126	2	0	360	0	5900	0	488437312	663099612	8	0.66918	1
	704586	707264		+	nasC	CCNA_00653	assimilatory nitrate reductase catalytic subunit	2360	0	0	5402	0	0	0	242988389	303060609	0	0	2990	0	49008	0	78596780352	41322908352	9	3.03371e-08	1
	707254	708039		+	-	CCNA_00654	uroporphyrin-III C-methyltransferase	3000	0	2399	6867	0	13956	1	1678797336	4630672875	8	0	0	0	0	0	0	244	0	1	1
708218			708312	+	-	CCNA_R0009	small non-coding RNA	4125	0	0	9442	0	0	7	928128436	1068775122	33	0	0	0	0	0	0	244	0	1	1
	710310	708328		-	-	CCNA_00655	conserved hypothetical protein	11790	7648	0	26987	26567	0	1	11328678472	21999675701	9	20774	0	38904	0	2	45159613978	29820315255	9	0.513207	1
	710696	712531		+	-	CCNA_00656	type I restriction-modification system methylation subunit	8069	4799	0	18470	16670	0	1	4159038752	11425111403	6	6550	1850	12266	30322	0	7155759169	33723078946	11	0.616324	1
	712528	713880		+	-	CCNA_00657	type I restriction-modification system specificity subunit	6321	0	0	14468	0	0	0	2584847343	2507753011	3	13650	1848	25562	30290	2	287071400	52451399325	20	0.109699	0.861772
	713877	714920		+	-	CCNA_00658	5-methylcytosine-specific restriction enzyme MRR	4712	4400	4650	10785	15284	27052	2	2619680145	21694703769	16	0	0	0	0	0	0	244	0	1	1
	714931	717825		+	-	CCNA_00659	type I restriction-modification system restriction subunit	21450	6944	537	49099	24121	3124	1	29436154840	42602638420	8	18859	2149	35317	35223	1	23673	81586807383	12	0.560709	1
	718802	717822		-	-	CCNA_00660	transposase	4700	2950	2247	10758	10247	13072	1	42298502	10842190185	11	7852	600	14704	9834	1	308200622	14398670691	12	0.512914	1
	719233	718799		-	-	CCNA_00661	transposase, HTH-Tnp1 superfamily	3751	700	4200	8586	2431	24434	3	5396994260	11592961665	27	429	500	803	8195	0	839059395	1549760390	10	0.663107	1
	719564	719217		-	-	CCNA_00662	hypothetical protein	2404	0	0	5502	0	0	1	253924087	319553980	5	0	0	0	0	0	0	244	0	1	1
	719943	719608		-	bapE	CCNA_00663	bacterial apoptosis endonuclease BapE	3046	0	0	6972	0	0	1	448241644	541321266	6	4234	0	7929	0	2	992860461	1186898312	11	0.611832	1
720441			720365	-	-	CCNA_R0010	tRNA-Arg	8219	0	0	18813	0	0	19	4854604202	4015835949	81	5969	47	11178	770	15	1907416282	2898914880	77	0.505039	1
	720528	721781		+	-	CCNA_00664	C4-dicarboxylate transport protein	12197	0	3465	27919	0	20158	2	9568866560	18421729006	12	0	0	0	0	0	0	244	0	1	1
	721949	723094		+	-	CCNA_00665	GAF-family sensor histidine kinase	20806	7358	4275	47625	25560	24870	5	7394100746	68971012124	28	28448	3550	53275	58187	5	314618361	188433336962	48	0.596629	1
	723091	723444		+	-	CCNA_00666	response regulator receiver domain protein	4501	5248	4800	10302	18230	27924	7	2949865751	24115811425	53	0	0	0	0	0	0	244	0	1	1
	724690	723506		-	-	CCNA_00667	lipopolysaccharide biosynthesis protein	0	7300	0	0	25358	0	1	9938720787	6405529976	7	6746	0	12633	0	1	3036544144	3303395247	5	0.556665	1
	725753	724701		-	-	CCNA_00668	capsular polysaccharide biosynthesis protein	2684	0	0	6143	0	0	0	330801719	409344638	1	0	976	0	15997	0	5351265697	6335845722	7	0.716239	1
	728206	725750		-	-	CCNA_00669	glycosyltransferase family 99 protein WbsX	11900	0	10800	27239	0	62830	1	62544570554	57539430772	12	23350	360	43728	5900	1	42219794789	42230446346	10	0.538046	1
	728955	728203		-	-	CCNA_00670	ABC-type polysaccharide/polyol phosphate transport system, ATPase component	12000	6749	0	27468	23444	0	4	10257169173	20218052917	22	7949	100	14886	1639	2	3402875776	6664151086	10	0.644031	1
	729756	728965		-	-	CCNA_00671	ABC-type polysaccharide/polyol phosphate export system, permease component	38175	7350	0	87382	25532	0	10	146594303531	95606169559	47	8848	0	16569	0	2	5822039158	6692078450	10	0.893331	1
	730693	729890		-	-	CCNA_00672	conserved hypothetical protein	2650	6501	0	6065	22583	0	2	5788337340	7950248022	11	0	142	0	2327	0	52369137	111315889	1	0.00151312	1
	730781	731788		+	-	CCNA_00673	AraC-family transcriptional regulator	11814	10897	8998	27042	37853	52347	5	7061389919	105107395369	38	0	1750	0	28683	0	21730162840	18866710960	14	0.681706	1
	733134	731887		-	-	CCNA_00674	NAD(FAD)-utilizing dehydrogenase	27820	84391	10647	63680	293156	61940	17	1982396019573	2016363307541	111	30398	2050	56927	33601	5	13230634018	130980048267	36	0.678558	1
	733495	733100		-	-	CCNA_00675	VapC-like PIN domain ribonuclease	121190	55725	19802	277405	193576	115201	90	605162657736	5015043753014	493	618852	106341	1158942	1743009	371	30079763070962	365251553382999	3664	0.0318122	0.305053
	733734	733495		-	-	CCNA_00676	PSK-family transcription factor	94525	11464	12410	216368	39823	72197	89	861716076897	1041074588758	456	78279	20846	146595	341681	83	2164246157590	5065266700157	1017	0.649067	1
733871			733806	-	-	CCNA_R0115	small non-coding RNA	0	0	0	0	0	0	0	0	356	0	0	0	0	0	0	0	244	0	1	1
	734571	733882		-	-	CCNA_00677	LSU ribosomal protein L1P	47046	0	921	107688	0	5358	12	301588489113	95878975266	54	14908	2248	27918	36846	5	1320000333	69026218512	46	0.527852	1
	735007	734576		-	-	CCNA_00678	LSU ribosomal protein L11P	30004	1586	2	68679	5509	11	13	99035734661	40399528440	57	102509	1324	191971	21701	48	1561332973801	848620099348	247	0.263468	1
735530			735387	-	-	CCNA_R0011	antisense sRNA to ISCc2 transposase	18471	1050	849	42280	3647	4939	25	26244024800	20188201868	117	2000	0	3745	0	2	164077267	292728646	13	0.000359096	0.00516516
	735544	736479		+	-	CCNA_00679	transposase, IS116/IS110/IS902 family	5797	0	0	13269	0	0	1	2100226626	2129377981	4	4051	1550	7586	25405	1	6932406066	23599561647	17	0.723386	1
	737247	736612		-	-	CCNA_00680	2-hydroxychromene-2-carboxylate isomerase	9000	0	5000	20601	0	29088	3	10464825743	19441406105	26	0	2902	0	47565	0	73156683361	39408112246	37	0.568683	1
	737981	737244		-	-	CCNA_00681	short chain dehydrogenase	10733	11694	11096	24567	40622	64552	8	21319458757	138964910927	58	3550	4102	6648	67234	2	130754751132	89598347654	50	0.52687	1
	738076	738534		+	-	CCNA_00682	MarR-family transcriptional regulator	17700	43177	15165	40515	149987	88225	30	236978966140	733638832630	202	108459	11015	203114	180544	52	12224743260	2847077863635	417	0.637218	1
	740460	738931		-	-	CCNA_00683	Deoxyribodipyrimidine photo-lyase-related protein	6332	0	100	14494	0	581	0	2476606461	2716887084	3	19448	0	36420	0	2	38546048605	27180869304	11	0.719523	1
	741111	740473		-	chrR	CCNA_00684	anti-sigma factor, ChrR-family	26871	34449	3800	61508	119668	22107	18	181206739154	385691401236	106	84249	0	157775	0	26	1300336216275	402333588259	123	0.536739	1
	741725	741108		-	-	CCNA_00685	RNA polymerase sigma factor	93377	21398	8050	213740	74332	46832	36	766021634475	1097592195603	180	77180	9841	144537	161301	28	5987842526	1703296404073	247	0.567091	1
	741897	743330		+	-	CCNA_00686	peptidase family S41 protein	6601	44	9100	15109	152	52940	1	43979521896	34240154671	15	13718	0	25690	0	1	16680069484	15626618644	8	0.618621	1
	743727	743356		-	-	CCNA_00687	conserved hypothetical protein	605767	381288	299999	1386606	1324514	1745296	627	7163603460170	744336917851994	3993	417486	36617	781838	600180	247	1823790181933	55331977002491	1857	0.647765	1
	745096	743786		-	-	CCNA_00688	conserved hypothetical protein	7869	0	0	18012	0	0	1	4373238333	3775562766	4	0	0	0	0	0	0	244	0	1	1
	745305	747635		+	-	CCNA_00689	PAS-family hybrid histidine kinase/receiver protein	21299	300	5148	48753	1042	29949	2	32654593964	46092073494	11	19699	0	36890	0	1	39750699713	27674044523	7	0.576142	1
	748207	747704		-	-	CCNA_00690	CarD-family transcriptional regulator	2565860	59032	24693	5873280	205064	143655	953	4379273945271920	1667404459839680	4115	553472	5976	1036503	97951	225	93899660052468	35789314869409	1125	0.71757	1
	748901	748560		-	-	CCNA_00691	ferredoxin	16015	0	100	36658	0	581	8	23619272559	12540764090	36	4472	39	8374	639	2	935553821	1555083876	13	0.668427	1
	749166	751250		+	-	CCNA_00692	PAS-family GGDEF/EAL protein	39861	104855	83428	91242	364244	485356	19	5397646063840	16648612996525	150	7000	150	13109	2458	0	2016048301	6075528885	3	1.03119e-83	5.07517e-82
	751778	751485		-	-	CCNA_00693	heat shock protein 15	2320	0	4450	5310	0	25888	4	8435969733	9263701480	35	0	2100	0	34420	1	33659687806	25100805116	58	0.599112	1
	754342	751775		-	-	CCNA_00694	ATP-dependent DNA helicase	200537	281932	230245	459031	979372	1339490	50	35526397737530	210312901912531	360	216507	70622	405459	1157547	22	55183442251183	74136192534676	304	0.529639	1
	756148	754514		-	-	CCNA_00695	metal-dependent hydrolase	216657	14748	38995	495930	51231	226860	30	6926291056402	9655690981905	157	207695	27451	388956	449942	29	132836175665	17092798580937	256	0.609362	1
	756229	756804		+	-	CCNA_00696	O6-methylguanine-DNA methyltransferase	10400	7145	0	23805	24820	0	5	8997593588	18768658129	28	10050	0	18820	0	3	7904075700	8459969530	16	0.613201	1
757263			757024	-	-	CCNA_R0116	small non-coding RNA	772203	7412	9630	1767580	25747	56024	596	249397371009950	81802383332219	2568	146099	5800	273603	95066	128	1749491207971	2600649593866	768	0.679231	1
	757815	757318		-	-	CCNA_00698	conserved hypothetical protein	5663569	566311	217598	12963968	1967245	1265914	2349	2.29454e+16	1.56315e+16	10841	4497959	708831	8423459	11618275	2121	1775963545860570	3.10386e+16	20122	0.646749	1
	758081	758380		+	-	CCNA_00699	LSU ribosomal protein L28P	245750	5808	189	562524	20175	1099	152	16157034868525	4966870068061	648	62341	1755	116747	28765	43	320117338496	327683732195	242	0.643264	1
758806			758663	-	-	CCNA_R0012	antisense sRNA to ISCc2 transposase	17062	400	550	39055	1389	3199	22	24284589178	15814502171	101	1450	0	2715	0	2	75824870	161374110	9	1.86299e-05	0.000322471
	761024	759099		-	-	CCNA_00700	TonB-dependent receptor	17547	0	3000	40165	0	17453	1	21366451070	24983042721	9	14697	0	27523	0	1	19680396967	17595838485	7	0.573868	1
	761611	761820		+	cspB	CCNA_00701	cold shock protein CspB	977743	16733	609	2238063	58126	3542	859	449704485872252	137566030243702	3650	600241	5777	1124088	94689	585	117210086394480	42588352586929	2901	0.542167	1
	761965	762324		+	-	CCNA_03888	conserved hypothetical protein	1207508	15546	1240	2763998	54003	7213	617	751022342948256	218296226182128	2615	123271	340	230853	5572	69	3057052955598	1032942219529	328	0.00124538	0.0164108
	762427	762633		+	-	CCNA_00703	hypothetical protein	83949	0	50	192160	0	290	73	1280736426469	344879783639	309	19484	0	36488	0	19	38719001351	27251888072	88	0.693814	1
	762676	762873		+	-	CCNA_00704	hypothetical protein	83701	0	300	191592	0	1745	76	1260188329087	348031711193	325	47724	0	89374	0	48	332407546261	128146450542	225	0.562129	1
	763315	763025		-	-	CCNA_00705	hypothetical protein	3650	0	0	8354	0	0	2	691832945	813929909	9	1350	0	2528	0	0	63889423	140119212	4	0.645341	1
	764003	763590		-	-	CCNA_00706	hypothetical protein	21643	13400	23746	49541	46548	138146	25	208565496379	519876737388	188	4699	0	8799	0	2	1274688226	1474513797	10	1.86756e-17	5.77954e-16
	765185	764103		-	-	CCNA_00707	conserved hypothetical membrane protein	118137	32112	39986	270416	111550	232625	31	639268095258	5590435167884	189	36201	6100	67794	99983	7	28659061829	470881957524	77	0.640209	1
	767110	765182		-	-	CCNA_00708	cobaltochelatase cobT subunit	687696	110359	99468	1574143	383364	578672	84	85623414449241	172500627889150	438	148430	20294	277969	332633	17	102152119902	8809834140353	158	0.676903	1
	767218	767400		+	-	CCNA_00709	hypothetical protein	606	0	0	1387	0	0	0	9299031	11891669	2	0	0	0	0	0	0	244	0	1	1
	768690	767521		-	-	CCNA_00710	alpha/beta hydrolase family protein	10344	0	0	23677	0	0	1	8430212293	5672729656	6	18590	4174	34814	68415	3	31769420423	164752322225	44	0.0249063	0.245755
	768833	769933		+	-	CCNA_00711	conserved hypothetical protein	14152	23350	48353	32394	81113	281301	14	1943911210292	1721092394144	119	2598	0	4865	0	0	307441757	463001196	2	3.45184e-207	2.518e-205
	770252	769938		-	-	CCNA_00712	hypothetical protein	52066	61405	41948	119179	213308	244039	89	356377146761	4821867369545	610	33727	19229	63161	315177	34	4001211231265	2758037781106	600	0.492585	1
	770423	770292		-	-	CCNA_03926	hypothetical protein	21537	33737	30139	49298	117195	175338	117	330969140907	1161802312615	863	38125	14076	71397	230716	80	1331086189664	1662868030595	1144	0.561107	1
	770709	770440		-	-	CCNA_00714	hypothetical protein	2790	415	15	6386	1441	87	2	281439364	717967912	9	24	318	44	5212	0	355416853	545401545	9	0.495127	1
	771094	770798		-	-	CCNA_03927	hypothetical protein	13657	0	1800	31261	0	10471	9	12137455417	14789486426	46	6202	1812	11614	29700	5	7184326627	32374348754	69	0.576544	1
	771327	771136		-	-	CCNA_03928	hypothetical protein	7466	3481	3466	17089	12092	20164	13	461359835	19223092381	85	17662	0	33076	0	18	30591105023	23689810892	86	0.496382	1
	771567	771391		-	-	CCNA_00716	hypothetical protein	20200	26529	2204	46238	92156	12822	50	109780888478	208458859498	284	1000	290	1872	4753	1	87431491	794028840	18	4.15385e-13	1.13123e-11
	771834	771721		-	-	CCNA_03929	hypothetical protein	0	0	615	0	0	3577	0	90344123	99824249	10	0	0	0	0	0	0	244	0	1	1
	772783	771887		-	-	CCNA_00718	abortive infection protein	55792	14599	34302	127708	50713	199557	21	492369125580	1530927804713	140	102443	24243	191848	397361	28	2452326678115	8086429293176	328	0.660841	1
772628			773769	+	-	CCNA_R0117	small non-coding RNA	114700	5449	2724	262549	18928	15847	19	2302510767070	833998704547	86	107874	50	202018	819	19	2330590479778	758754906441	88	0.491824	1
	772894	772790		-	-	CCNA_03930	hypothetical protein	8325	0	1136	19056	0	6608	16	3678491360	6541643819	81	1900	0	3558	0	3	145096945	258204945	16	0.287046	1
	773730	773437		-	-	CCNA_03931	hypothetical protein	6402	4949	100	14654	17191	581	7	3048723345	9926990576	36	5198	0	9734	0	3	1624288710	1827605645	16	0.641944	1
	773987	773733		-	-	CCNA_03932	hypothetical protein	8576	9451	7946	19630	32830	46227	18	7891070266	69978188755	129	0	0	0	0	0	0	244	0	1	1
	774278	774018		-	-	CCNA_03933	hypothetical protein	2550	11300	13898	5836	39253	80854	19	95496745556	127641002314	160	0	0	0	0	0	0	244	0	1	1
	774394	775635		+	hlyD	CCNA_00719	type I secretion adaptor protein hlyD	26764	5050	3450	61263	17542	20070	5	34349207850	70279060049	26	700	0	1310	0	0	13189098	26131694	0	5.17274e-221	3.84194e-219
	775596	777776		+	-	CCNA_00720	type I protein secretion ATP-binding protein/type I protein secretion transmembrane	16399	350	2150	37537	1215	12507	1	17628385344	20442804682	7	14200	0	26592	0	1	18120342836	16595123695	6	0.557726	1
	779585	777942		-	-	CCNA_00721	chaperonin GroEL	1070656	111802	110355	2450742	388376	642009	142	333007165998005	371782260138945	705	1672876	31809	3132843	521373	210	1094682319893930	616921909717875	1111	0.606918	1
	779933	779643		-	-	CCNA_00722	chaperonin GroES	277605	29615	8115	635440	102876	47210	196	16892227145174	10044786817363	899	111400	3658	208622	59957	80	1127366095544	1333041915746	461	0.614839	1
	780108	780302		+	-	CCNA_00723	glyoxalase family protein	9672	0	1704	22139	0	9913	10	5102698989	9723544847	54	0	0	0	0	0	0	244	0	1	1
	780321	780749		+	-	CCNA_00724	hypothetical protein	5982	0	884	13692	0	5142	2	1643241294	4022164609	14	0	0	0	0	0	0	244	0	1	1
	781612	780950		-	-	CCNA_00725	O6-methylguanine-DNA methyltransferase	3700	0	50	8469	0	290	1	686634594	901616933	4	150	0	280	0	0	325044	524217	0	3.29732e-65	1
	782970	781663		-	-	CCNA_00726	acyl-CoA dehydrogenase	12811	0	0	29324	0	0	1	14086081653	8286125561	7	14952	0	28001	0	2	20510701096	18123479293	10	0.570577	1
	783127	783723		+	-	CCNA_00727	ribosomal-protein-alanine acetyltransferase	0	0	0	0	0	0	0	0	356	0	0	0	0	0	0	0	244	0	1	1
	783796	784959		+	-	CCNA_00728	conserved hypothetical protein	0	0	0	0	0	0	0	0	356	0	0	0	0	0	0	0	244	0	1	1
	785054	786358		+	-	CCNA_00729	conserved hypothetical protein	0	0	0	0	0	0	0	0	356	0	0	2450	0	40157	0	48729396296	31153878222	15	1	1
	786434	787201		+	-	CCNA_00730	SkaA-family transcriptional regulator	0	0	427	0	0	2484	0	37654623	41444390	1	0	0	0	0	0	0	244	0	1	1
	789274	787361		-	mutL	CCNA_00731	DNA mismatch repair protein mutL	26371	11747	10300	60363	40806	59922	4	5187578022	240111849203	28	6000	3700	11236	60645	1	80149083295	84722645243	18	0.569251	1
	789387	790439		+	-	CCNA_00732	GumN superfamily protein	90742	32697	83313	207709	113582	484687	35	4840327618278	10767569878245	255	59595	3650	111605	59826	12	89687679233	497755114419	81	0.669042	1
	790499	791437		+	-	CCNA_00733	GumN superfamily protein	65818	65973	39820	150658	229176	231659	33	155636328154	5527831911591	217	44343	3700	83042	60645	10	12001061083	317507454538	76	0.648071	1
	791491	792399		+	-	CCNA_00734	GumN superfamily protein	29704	58020	56011	67992	201549	325853	28	1841099407318	5201658523586	218	33180	50	62137	819	7	134578337762	65371840290	34	0.0108486	0.117239
	793030	792461		-	bamF	CCNA_00735	beta-barrel assembly machine (BAM) protein BamF	271757	38452	20455	622054	133574	119000	105	12487009373239	13445855513741	511	147505	9600	276236	157351	55	659278562704	3805009545218	380	0.549694	1
	793649	793143		-	-	CCNA_00736	lipoprotein signal peptidase	4998	0	0	11440	0	0	1	1471217726	1571875602	7	0	0	0	0	0	0	244	0	1	1
	796705	793796		-	ileS	CCNA_00737	isoleucyl-tRNA synthetase	96757	20600	3350	221477	71560	19489	7	1120876807921	923927275949	35	268861	15099	503503	247484	19	4155442505336	14022671191562	129	0.698391	1
	796828	796784		-	-	CCNA_03934	hypothetical protein	9520	0	276	21791	0	1605	39	6345860721	5557783009	173	1610	0	3015	0	7	97511002	195334292	33	0.115387	0.90455
	798110	797019		-	-	CCNA_00738	DegQ-family trypsin-like serine prototease	6040	0	2347	13825	0	13654	1	2283732694	7383506777	8	50	0	93	0	0	23077	-5668	0	1	1
	799454	798513		-	-	CCNA_00740	riboflavin kinase/FMN adenylyltransferase	6559	11701	13648	15013	40646	79399	6	66956267306	156058164547	47	7948	2451	14884	40173	2	16062013309	51081571808	29	0.58799	1
	799879	799454		-	-	CCNA_00741	3-hydroxybutyryl-CoA dehydratase	2042	0	50	4674	0	290	0	159757122	237302651	3	15098	1638	28274	26848	7	16167797	51182127075	64	1.62422e-13	4.57583e-12
	800797	799937		-	-	CCNA_00742	HAD superfamily sugar phosphatase	12264	13750	5901	28072	47764	34330	6	4040142089	90044514909	42	15243	0	28546	0	3	21481897137	18716182323	16	0.675591	1
	800944	801510		+	-	CCNA_00743	NnrU family membrane protein	1500	0	2077	3433	0	12083	1	1276925507	2864802368	9	0	0	0	0	0	0	244	0	1	1
	801752	802036		+	-	CCNA_00744	GIY-YIG endonuclease domain protein	112358	23500	4491	257188	81634	26127	89	1568095205879	1392237926374	426	222559	3429	416792	56203	160	9453528616496	4672086666723	829	0.631241	1
	802774	802070		-	-	CCNA_00745	conserved hypothetical protein	1932	0	2950	4422	0	17162	1	3018423356	4870050786	10	0	0	0	0	0	0	244	0	1	1
	802082	802519		+	-	CCNA_03935	hypothetical protein	8395	0	0	19216	0	0	3	5107938610	4137271919	14	7350	0	13764	0	3	3730363891	4442069507	15	0.516045	1
	803496	802771		-	-	CCNA_00746	ADA regulatory protein/O6-methylguanine-DNA	11164	0	0	25554	0	0	2	10124086134	6491276982	11	0	1386	0	22717	0	12416704724	12486691750	15	0.557406	1
	804953	803595		-	tipF	CCNA_00747	cyclic-di-GMP phosphodiesterase, flagellum assembly factor TipF	77443	0	5348	177267	0	31112	11	876395419643	406526609979	51	39691	0	74330	0	5	213578692715	90717537179	27	0.607178	1
	805164	805484		+	-	CCNA_00748	ferrous iron transport protein A	0	0	0	0	0	0	0	0	356	0	0	0	0	0	0	0	244	0	1	1
	805489	807384		+	-	CCNA_00749	ferrous iron transport protein B	11500	7299	0	26323	25355	0	1	10410328955	20719081294	9	8601	0	16107	0	0	5440003611	6403333457	4	0.65108	1
	808621	807593		-	-	CCNA_00750	FeaR-family transcriptional regulator	13177	24200	2700	30162	84065	15707	7	86274521408	139578451875	42	9100	7000	17041	114735	3	411573065448	259941402665	64	0.584878	1
808729			808841	+	-	CCNA_R0118	small non-coding RNA	7736	14500	23066	17707	50369	134190	72	294465242287	381648747050	596	0	0	0	0	0	0	244	0	1	1
	810233	808992		-	-	CCNA_00751	conserved hypothetical membrane protein	18945	50	6314	43365	173	36732	3	30189348615	46626291742	21	6948	0	13011	0	1	3259189652	3624619141	5	0.998838	1
	811262	810384		-	-	CCNA_00752	3-hydroxybutyryl-CoA dehydrogenase	111637	185430	52993	255538	644144	308296	72	5987352902652	32028687535711	458	222624	58246	416914	954695	64	24672723724278	54425456304579	780	0.62331	1
	812437	811400		-	-	CCNA_00753	lysine 2,3-aminomutase	26179	0	2932	59924	0	17057	5	59571656466	43248494431	24	0	4291	0	70332	0	187038550014	81089955902	33	0.558681	1
	813296	812595		-	-	CCNA_00754	Nodulin-21 / CCC1-related protein	223404	413513	294737	511374	1436457	1714683	240	82862988890949	437045853791236	1739	147065	23149	275412	379429	49	478425569720	10436158624167	466	0.707981	1
	813884	813444		-	terB	CCNA_00755	tellurium resistance protein terB	32127	4700	1850	73539	16326	10762	15	79119152925	73086089913	76	6799	50	12732	819	3	2637635316	4129715546	15	0.355303	1
	814120	813842		-	-	CCNA_00756	hypothetical protein	228309	32764	13822	522601	113815	80411	178	8693358123171	7906076612908	856	48524	6186	90872	101393	39	1957495892	667711105009	344	0.648154	1
814185			814045	-	-	CCNA_R0119	small non-coding RNA	6688995	908444	721391	15311179	3155743	4196817	10706	2.44571e+16	4.24463e+16	53578	892427	55859	1671274	915571	1364	55822175307928	256623387474416	9173	0.906225	1
	815314	814256		-	-	CCNA_00757	lysyl-tRNA synthetase	8951	0	0	20488	0	0	1	5957354583	4526314125	6	0	0	0	0	0	0	244	0	1	1
	815435	816001		+	-	CCNA_00758	translation elongation factor P EF-P	32260	50	100	73843	173	581	10	127665601665	40806688676	43	78351	0	146730	0	28	1092469717079	334636771641	129	0.664282	1
	818675	816201		-	-	CCNA_00759	TonB-dependent receptor	15896	0	0	36386	0	0	1	23642688024	12095695934	4	30299	0	56741	0	2	111716358387	53935798619	11	0.656019	1
818770			818899	+	-	CCNA_R0120	small non-coding RNA	1150	0	0	2632	0	0	1	43265382	47903267	6	0	0	0	0	0	0	244	0	1	1
	820510	818810		-	-	CCNA_00760	two component sensor histidine kinase	11428	0	0	26158	0	0	1	10707926429	6764437606	5	14953	4300	28002	70480	2	55764492045	151490397037	28	0.0612019	0.519771
	820864	820655		-	-	CCNA_00761	conserved hypothetical protein	19124	0	2500	43775	0	14544	18	27268914377	25515988178	92	5379	0	10073	0	5	1763377162	1974386552	23	0.964404	1
	821205	820861		-	-	CCNA_00762	conserved hypothetical protein	13697	0	2584	31352	0	15032	8	11718113924	17391001469	44	3423	0	6410	0	2	595968459	743600095	9	0.0879794	0.702479
	822151	821210		-	-	CCNA_00763	electron transfer flavoprotein alpha subunit	55094	36487	13416	126110	126748	78049	20	46851180300	1062215304844	117	18549	0	34737	0	3	34408484625	25434721303	18	0.0244783	0.242419
	822897	822151		-	-	CCNA_00764	electron transfer flavoprotein beta subunit	35409	17164	7609	81051	59624	44266	14	17371813588	318857620994	82	50247	9134	94099	149713	16	106464770759	1097975928431	163	0.630543	1
	823153	823443		+	-	CCNA_00765	hypothetical protein	750	0	0	1716	0	0	0	15498725	18722904	1	3850	0	7210	0	2	790330314	966411522	12	0.00580257	0.065843
	824180	823602		-	-	CCNA_00766	cobalamin adenosyltransferase family protein	30032	8603	4337	68743	29885	25231	13	32195536995	121746446277	71	31	0	58	0	0	7430	7459	0	1	1
	824421	824218		-	-	CCNA_00767	conserved hypothetical protein	34558	7399	5867	79103	25702	34132	42	50030053694	168514612301	227	0	1950	0	31961	1	28174282674	22491684270	78	0.684628	1
	824706	824840		+	-	CCNA_03936	hypothetical protein	8670	2	0	19845	6	0	11	5516448890	4330765550	49	0	0	0	0	0	0	244	0	1	1
	824776	825000		+	-	CCNA_00768	hypothetical protein	4852	0	370	11106	0	2152	4	1117548363	2123752160	19	0	0	0	0	0	0	244	0	1	1
	824997	825644		+	-	CCNA_00769	TetR family transcriptional regulator	18748	6199	30028	42914	21534	174693	15	638428540208	542222865099	123	31302	0	58620	0	9	120801953969	57286703444	45	0.655813	1
	825728	826336		+	-	CCNA_00770	TetR family transcriptional regulator	16339	0	2114	37400	0	12298	5	18723751850	19447003820	27	52351	0	98039	0	17	415069956921	150265952608	80	0.671533	1
826839			826953	+	-	CCNA_R0013	small non-coding RNA	0	0	0	0	0	0	0	0	356	0	0	1715	0	28110	3	20702845192	18240930048	122	1	1
	827239	827021		-	-	CCNA_00772	hypothetical protein	0	0	0	0	0	0	0	0	356	0	0	0	0	0	0	0	244	0	1	1
	827458	828936		+	-	CCNA_00773	carboxypeptidase S	18022	41748	33303	41252	145023	193746	11	548900883720	1553518944456	85	0	888	0	14554	0	4265026113	5271887565	4	4.58998e-13	1.24173e-11
	829105	829290		+	-	CCNA_03937	hypothetical protein	8350	0	0	19113	0	0	8	5042475048	4106400932	34	0	50	0	819	0	4272146	8614684	2	1.04791e-18	3.29286e-17
	829317	830426		+	-	CCNA_00774	ring hydroxylating diooxygenase	9	0	0	20	0	0	0	356	332	0	0	0	0	0	0	0	244	0	0.926074	1
	831593	830436		-	-	CCNA_00775	aspartate aminotransferase	1650	0	1850	3776	0	10762	0	931754351	2533302949	4	3822	0	7157	0	0	776458872	954388977	3	0.552849	1
	835249	831686		-	-	CCNA_00776	OAR protein precursor	19748	6752	5640	45203	23455	32811	1	4905788651	74464240242	9	37200	0	69665	0	2	182809661623	79523370629	9	0.505247	1
	837786	835363		-	-	CCNA_00777	PAS family GGDEF/EAL protein	33911	0	400	77622	0	2327	2	140617144641	46298437092	10	23649	0	44288	0	1	61638288248	35576856614	9	0.538749	1
	839778	837946		-	-	CCNA_00778	GTP-binding protein TypA/BipA	545944	24765	9208	1249671	86028	53569	57	100035562685531	44197519667061	252	695262	8675	1302037	142189	77	156072573752661	61370759870122	393	0.605096	1
840137			840219	+	-	CCNA_R0014	stationary phase expressed sRNA	400	0	624	915	0	3630	2	72838020	194462606	18	0	0	0	0	0	0	244	0	1	1
	840345	840746		+	-	CCNA_00779	TonB superfamily protein	53275	21944	30810	121947	76228	179242	47	204488112685	1524751216237	312	14271	26	26725	426	7	17644858101	17192003406	33	0.000542478	0.00764146
	841686	840760		-	-	CCNA_00780	N-formylglutamate deformylase	92462	47899	46700	211646	166391	271685	36	216127581209	6310980286448	233	70250	5199	131559	85215	16	68730332098	873428718755	116	0.619644	1
	841838	842194		+	cpdR	CCNA_00781	two-component receiver protein CpdR	866353	19859	15031	1983091	68986	87445	458	315624732433455	114763650434812	1997	364402	157	682426	2573	207	43307194370542	11589963166991	959	0.637197	1
842304			842378	+	-	CCNA_R0015	tRNA-Val	12533	0	454	28688	0	2641	31	12034999565	9336666733	139	25982	0	48657	0	70	77252544678	40833923207	324	0.656871	1
	844108	842489		-	-	CCNA_00782	aminobenzoyl-glutamate transport protein	19998	6600	0	45775	22927	0	2	29042672371	34745464083	14	3050	1457	5711	23881	0	7264668990	19869991085	9	0.593255	1
844332			844401	+	-	CCNA_R0016	small non-coding RNA	90963	72945	108106	208215	253395	628925	705	7455858795334	25047642938740	5193	246	98	460	1606	0	9567689	86901558	14	0	0
	846426	844450		-	sapA	CCNA_00783	secreted protease precursor sapA	84880	35697	27750	194291	124003	161440	13	81429515816	3014904065257	80	105692	35312	197932	578790	14	10779420233342	14857141224035	196	0.67494	1
	846681	847904		+	-	CCNA_00784	peptidoglycan-associated outer membrane lipoprotein	175506	39866	119290	401735	138486	693990	49	11621192348816	33656906516784	336	102998	3049	192887	49975	17	1025483974994	1089324718989	99	0.694981	1
848150			847992	-	-	CCNA_R0121	small non-coding RNA	16169	0	0	37011	0	0	18	24629095403	12423421758	77	0	0	0	0	0	0	244	0	1	1
	849932	848157		-	-	CCNA_00785	tRNA methyltransferase/FAD-dependent oxidoreductase MnmC	7200	6900	9846	16480	23969	57280	2	25610984544	68477017541	18	7444	2301	13940	37715	1	13850111432	45403712857	14	0.545169	1
	850442	850116		-	-	CCNA_03938	hypothetical protein	46861	28209	27990	107265	97992	162836	57	80873502747	1424904150589	375	12899	2600	24156	42615	9	7545075923	73158036524	102	0.875448	1
	851420	850554		-	motA	CCNA_00787	chemotaxis motA protein	75977	0	4253	173912	0	24742	16	863818688674	367601241245	76	60762	6928	113790	113555	15	213469	958184370422	131	0.606217	1
	851554	852870		+	-	CCNA_00788	transporter, major facilitator superfamily	2750	0	5450	6294	0	31706	1	13800168027	12924666906	9	5802	0	10865	0	0	2114634742	2333814508	4	0.650589	1
	853523	852873		-	fixK	CCNA_00789	hypoxia transcriptional regulator FixK	3100	0	0	7095	0	0	0	467455478	565908029	3	9700	0	18165	0	3	7259872140	7807378886	13	0.719083	1
	853699	854076		+	fixT	CCNA_00790	hypoxia negative feedback regulator FixT	2350	2100	0	5379	7294	0	2	385854250	1918064303	11	0	0	0	0	0	0	244	0	1	1
	854395	854685		+	-	CCNA_03939	hypothetical protein	9960	7345	18485	22798	25514	107539	22	173162985961	223181060960	178	7529	43	14099	704	5	3494833831	5579804478	25	0.0210314	0.214248
	856210	855026		-	-	CCNA_00792	glycosyltransferase	6032	2756	0	13807	9573	0	1	1734264656	5551941312	6	8648	0	16195	0	1	5511607631	6457635794	6	0.506284	1
	856299	857666		+	-	CCNA_00793	phosphatidylglycerol glycosyltransferase	47098	15650	7547	107807	54364	43905	9	76554776167	396965671735	50	33699	2150	63109	35240	5	20279410726	151125804067	35	0.555353	1
	857776	858969		+	-	CCNA_00794	conserved membrane spanning protein	1200	0	0	2746	0	0	0	47900021	53082750	0	0	0	0	0	0	0	244	0	1	1
	859588	858980		-	fixJ	CCNA_00795	two-component response regulator FixJ	3388	7154	0	7755	24851	0	3	7084949534	10029370296	17	0	32	0	524	0	1462712	2290206	0	3.0826e-248	2.37593e-246
	861068	859581		-	fixL	CCNA_00796	oxygen sensory histidine kinase FixL	3424	5604	0	7837	19467	0	1	3787906539	7303057174	6	0	2676	0	43861	0	60221625698	35105375728	14	0.662558	1
	861178	861285		+	-	CCNA_03940	hypothetical protein	0	0	0	0	0	0	0	0	356	0	0	0	0	0	0	0	244	0	1	1
	862892	861294		-	cydC	CCNA_00798	ABC transporter, ATP-binding protein cydC	10386	9347	4214	23773	32469	24515	2	690991165	47127241469	16	11779	918	22058	15046	1	739238510	27897344855	11	0.577249	1
	864705	863065		-	cydD	CCNA_00799	ABC transporter, ATP-binding protein cydD	5000	0	0	11445	0	0	0	1472761447	1582278534	2	0	2399	0	39321	0	46330067772	30266111533	11	0.617013	1
	864829	866391		+	cydA	CCNA_00800	cytochrome bd-type quinol oxidase, subunit 1 cydA	18988	5900	4749	43463	20495	27628	3	5869241239	59508715482	19	7650	2899	14326	47516	1	30844761107	63218105503	19	0.501361	1
	866406	867557		+	cydB	CCNA_00801	cytochrome bd-type quinol oxidase, subunit 2 cydB	5873	0	0	13443	0	0	0	2166932439	2194615037	3	0	0	0	0	0	0	244	0	1	1
	867576	867695		+	ybgT	CCNA_00802	cyd operon protein YbgT	1831	0	0	4191	0	0	2	132134699	150691487	11	0	0	0	0	0	0	244	0	1	1
	867854	868309		+	-	CCNA_00803	chemotaxis protein cheW	0	0	2989	0	0	17389	1	4018958767	3589751679	12	0	1300	0	21307	0	10646761867	11002103295	23	0.624669	1
	868859	868374		-	-	CCNA_00804	ASC-1 homology domain protein	5391	5450	0	12340	18932	0	4	3618861411	9305865521	21	3787	3000	7092	49172	2	54518733697	53141723238	57	0.675504	1
	869778	869089		-	yihA	CCNA_00805	GTP-binding protein YihA	3700	725	2750	8469	2518	15998	1	1552955058	7152689430	13	4049	0	7582	0	1	891754023	1075399377	5	0.647804	1
	871625	869778		-	yidC	CCNA_00806	inner membrane protein translocase component yidC	44150	6670	350	101059	23170	2036	5	209627113768	128509461409	22	34148	4000	63949	65563	4	21763687	250584693624	35	0.585742	1
	872082	871633		-	-	CCNA_00807	ribonuclease P protein component	81332	27175	11548	186169	94400	67182	48	321735439615	1218628307923	257	31602	5349	59181	87674	16	21386298945	335327172720	163	0.575196	1
	872310	872176		-	-	CCNA_00808	LSU ribosomal protein L34P	54757	15883	1138	125339	55174	6620	96	289802039248	326349847642	462	16589	18	31066	295	24	25721948853	21828557978	116	0.814036	1
	873585	872590		-	-	CCNA_00809	quinone oxidoreductase	8500	3500	0	19456	12158	0	2	3819309680	9483579508	10	0	0	0	0	0	0	244	0	1	1
	874886	873744		-	-	CCNA_00810	acetyl esterase	10673	481	3500	24430	1670	20361	2	6337510265	17439047040	13	0	0	0	0	0	0	244	0	1	1
	875553	874918		-	-	CCNA_00811	TetR-family transcriptional regulator	7852	8111	7172	17973	28175	41724	6	6061819332	54821065841	46	0	0	0	0	0	0	244	0	1	1
	876026	875775		-	-	CCNA_00812	conserved hypothetical protein	0	0	0	0	0	0	0	0	356	0	0	1049	0	17193	0	6362209980	7101239141	34	1	1
	877531	876155		-	-	CCNA_00813	flavin-binding monooxygenase-related protein	8200	0	3413	18769	0	19855	1	5184113229	13233751378	9	0	0	0	0	0	0	244	0	1	1
	878080	877757		-	-	CCNA_00814	hypothetical protein	0	0	0	0	0	0	0	0	356	0	0	0	0	0	0	0	244	0	1	1
	879724	878273		-	-	CCNA_00815	lignostilbene-alpha,beta-dioxygenase	14027	6249	6750	32107	21707	39269	3	2953777321	61561537846	21	8700	10350	16292	169644	2	1214559154370	614012537797	64	0.660717	1
	879912	879721		-	-	CCNA_00816	hypothetical protein	395	0	0	904	0	0	0	3328573	4838824	1	0	0	0	0	0	0	244	0	1	1
	881284	879956		-	-	CCNA_00817	L-sorbosone dehydrogenase	40296	28926	9869	92237	100482	57414	10	28958918668	592794331466	62	47914	5870	89729	96213	8	612614426	614063161827	69	0.52624	1
	882167	881445		-	-	CCNA_00818	glutathione S-transferase	14058	0	0	32178	0	0	3	17603385831	9791401740	14	15500	350	29027	5736	4	13183038824	25461492926	24	0.594855	1
	883395	882223		-	-	CCNA_00820	3-ketoacyl-CoA thiolase	28262	0	3050	64692	0	17743	4	72081751652	48838092336	23	33351	0	62457	0	5	140656139396	64406487744	26	0.523499	1
	883889	883440		-	-	CCNA_00821	hypothetical protein	10610	0	0	24286	0	0	4	8960017772	5940416970	17	8400	0	15730	0	3	5139406145	6174221520	17	0.490973	1
	884305	883961		-	-	CCNA_00822	hypothetical protein	74037	14605	23727	169471	50734	138035	59	311628290305	1323736293813	346	125914	25738	235802	421865	89	1931737234379	10543287328402	953	0.679988	1
	885244	884441		-	-	CCNA_00823	LuxR-like DNA-binding protein	206687	100	43518	473108	347	253173	56	7897836132642	8177629646936	301	125728	9199	235454	150778	34	292004004532	2891448800460	240	0.535362	1
	884910	884548		-	-	CCNA_03941	hypothetical protein	118454	0	19832	271142	0	115376	69	2094309690055	1626620264932	354	55724	5849	104355	95869	34	1168560685	736285127153	275	0.543698	1
	886054	885326		-	-	CCNA_00824	GntR-family transcriptional regulator	5620	40	3540	12864	138	20594	2	4302869345	10578139777	15	14348	0	26869	0	3	18576659206	16889317085	18	0.534718	1
	886825	886217		-	-	CCNA_00825	2-dehydro-3-deoxy-6-phosphogalactonate aldolase	0	0	0	0	0	0	0	0	356	0	0	1850	0	30322	0	24830349320	20676615529	24	1	1
	887742	886822		-	-	CCNA_00826	2-dehydro-3-deoxygalactonokinase	8850	0	2350	20257	0	13671	2	4306626487	10759692071	12	0	0	0	0	0	0	244	0	1	1
	888079	891006		+	-	CCNA_00827	TonB-dependent receptor	19398	6150	9400	44402	21363	54686	2	14353690346	112711173117	13	21049	2249	39419	36862	1	65662563	95744174568	13	0.507771	1
	891133	892647		+	-	CCNA_00828	tryptophan halogenase	2702	6550	6650	6184	22753	38687	1	12770578916	33688732282	14	50	0	93	0	0	23077	-5668	0	1	1
892718			892861	+	-	CCNA_R0122	small non-coding RNA	3799	0	1900	8695	0	11053	7	1086589198	4298692880	45	0	0	0	0	0	0	244	0	1	1
	892954	894603		+	-	CCNA_00830	beta-galactosidase	0	0	0	0	0	0	0	0	356	0	0	4951	0	81150	0	263667416099	108028486151	24	1	1
	894504	897455		+	-	CCNA_00831	alpha-glucosidase	6250	0	4360	14306	0	25365	0	7088112947	13749952431	4	9992	3618	18712	59301	0	49997011923	100161382511	13	0.679675	1
	898481	897582		-	-	CCNA_00832	LysR-family transcriptional regulator	11530	2256	320	26392	7836	1861	2	7188592478	11938631666	13	8252	50	15453	819	1	4321508055	6506018404	9	0.583003	1
	898620	899219		+	-	CCNA_00833	NAD(P)H:quinone oxidoreductase	77885	163246	45147	178279	567082	262650	86	5568708153159	20281171905470	560	660728	261314	1237364	4283133	311	1583567989310860	1468290067129270	4600	0.0398987	0.368747
	899490	899356		-	-	CCNA_03942	hypothetical protein	0	0	0	0	0	0	0	0	356	0	0	0	0	0	0	0	244	0	1	1
	899662	900483		+	fljM	CCNA_00834	flagellin FljM	147316	7799	12450	337207	27092	72430	36	3448448980956	2275090421564	177	65944	3249	123495	53253	17	186464641347	539120949151	107	0.585915	1
900614			900704	+	-	CCNA_R0017	small non-coding RNA	1400	0	300	3204	0	1745	3	49268858	234843731	18	0	0	0	0	0	0	244	0	1	1
	901034	901855		+	fljN	CCNA_00835	flagellin FljN	41557	0	5250	95124	0	30542	10	176688436363	126830817423	50	15949	950	29868	15571	4	4086502876	36860204736	27	0.611397	1
	902191	903012		+	fljO	CCNA_00836	flagellin FljO	62611	0	0	143317	0	0	13	634700726052	182987587252	58	27798	2500	52058	40976	7	2217417931	137201130977	56	0.498424	1
	904739	903123		-	-	CCNA_00837	alpha-L-fucosidase	6750	0	4011	15450	0	23334	1	6006941964	13313257217	7	15707	4050	29414	66382	2	39952715105	144254155767	29	0.792313	1
	906873	904900		-	-	CCNA_00838	alpha-glucosidase	37192	0	2301	85132	0	13386	3	153317621623	69706619068	16	8147	3351	15257	54925	1	47317385093	80737454919	17	0.512102	1
	907095	909575		+	-	CCNA_00839	glucan 1,4-beta-glucosidase	11450	50	9049	26209	173	52644	1	40303658845	45367512423	10	0	2700	0	44255	0	61528118343	35539075732	8	0.536318	1
	909868	911793		+	-	CCNA_00840	sialic acid-specific 9-O-acetylesterase	4450	0	0	10186	0	0	0	1113430982	1260263797	1	5281	1850	9889	30322	0	9628555331	31210596617	10	0.0771643	1
	913419	911803		-	-	CCNA_00841	carboxylesterase type B	7076	0	5749	16197	0	33445	1	13680261873	19411378237	10	0	0	0	0	0	0	244	0	1	1
	915233	913509		-	-	CCNA_00842	hypothetical protein	44140	94560	51298	101036	328481	298435	19	1661479892176	8215340301360	140	307519	125281	575899	2053450	50	279039675119230	267920023139208	762	0.99508	1
	916645	915317		-	-	CCNA_00843	endo-beta-mannanase	19485	11399	11580	44601	39597	67368	5	10204053678	209500234402	38	13097	859	24527	14079	2	1925057023	29500021939	14	0.665168	1
	917002	916721		-	relE-1	CCNA_00844	toxin protein relE-1	23171	2090	1996	53038	7260	11612	17	36825560598	38025523274	85	19381	2161	36295	35420	15	5007074	84344632383	127	0.574553	1
	917262	916999		-	relB-1	CCNA_00845	antitoxin protein relB-1	31464	16396	8299	72021	56956	48280	38	6182399822	293329603640	223	60368	13103	113052	214768	56	453417481907	1973432694530	620	0.676902	1
	920390	917301		-	-	CCNA_00846	proline dehydrogenase/delta-1-pyrroline-5-carboxylate	199258	10984	8296	456103	38156	48263	12	8048222173458	4158765473307	58	432877	5907	810661	96820	28	48686390407194	20729458979486	146	0.682917	1
920425			920663	+	-	CCNA_R0018	complex medium expressed sRNA	12440	0	0	28475	0	0	9	13127059514	7861327672	39	0	0	0	0	0	0	244	0	1	1
	920475	920636		+	-	CCNA_03943	hypothetical protein	3798	0	0	8693	0	0	4	761135081	884475960	17	0	0	0	0	0	0	244	0	1	1
920752			920579	-	-	CCNA_R0019	stationary phase expressed sRNA	289121	25899	24000	661800	89967	139624	353	15916363599281	14204521216626	1707	118838	10650	222551	174561	150	74735303932	3086165656916	1141	0.569369	1
	920836	921303		+	-	CCNA_00847	leucine-responsive regulatory protein	121582	5200	50	278302	18063	290	49	2890999489671	830366840250	211	103045	1500	192975	24586	45	1520256706755	879697744950	232	0.522456	1
	921494	921330		-	-	CCNA_00848	leucine-responsive regulatory protein	18183	0	0	41621	0	0	19	32644086513	14731945045	84	0	0	0	0	0	0	244	0	1	1
921719			921612	-	-	CCNA_R0123	small non-coding RNA	900	0	0	2060	0	0	1	24029020	27782888	6	0	0	0	0	0	0	244	0	1	1
	923134	921731		-	-	CCNA_00849	outer membrane efflux protein	37357	8349	6401	85510	29002	37238	6	57972482557	210092269990	36	5549	0	10391	0	0	1899947662	2119976749	3	5.64693e-05	0.000915385
	926291	923136		-	acrB2	CCNA_00850	cation/multidrug efflux pump acrB2	199280	20628	19451	456154	71657	113159	13	6003904949602	6127176309231	67	91498	3150	171350	51630	6	670446464308	923015979086	35	0.612777	1
	927470	926304		-	-	CCNA_00851	periplasmic multidrug efflux lipoprotein precursor	233146	356	1949	533673	1236	11338	36	14477931536514	4230127966261	156	78753	50	147483	819	13	1091290730368	343712497911	63	0.635594	1
	927638	928252		+	-	CCNA_00852	TetR family transcriptional regulator	44415	559	4300	101666	1941	25015	14	210150772463	135559817226	69	41999	0	78652	0	13	244606196432	101802601938	63	0.513538	1
	929016	928249		-	-	CCNA_00853	3-isopropylmalate dehydrogenase	6400	47	1550	14649	163	9017	1	1872096945	5738057676	10	6900	0	12921	0	1	3205344492	3549172515	8	0.540551	1
	929146	930738		+	-	CCNA_00854	metallo-beta-lactamase protein	2550	7650	2850	5836	26574	16580	1	4345058842	18999283312	10	8500	50	15918	819	1	4658430834	6799696247	5	0.635303	1
	931592	930735		-	-	CCNA_00855	rhamnogalacturonan acetylesterase	0	0	0	0	0	0	0	0	356	0	7600	0	14232	0	1	4042055286	4985849918	8	1	1
	933355	931733		-	-	CCNA_00856	beta-xylosidase	16599	0	2150	37995	0	12507	2	19443038757	19957676334	10	0	4350	0	71299	0	193269916151	83375241391	21	0.632528	1
	934963	933527		-	-	CCNA_00857	glucose/fructose transport protein	46649	7250	16050	106780	25184	93373	8	137557522844	480174033541	52	17399	2150	32583	35240	2	71995244	75465492945	23	0.631239	1
	935330	937543		+	-	CCNA_00858	TonB-dependent receptor	338833	30748	20918	775592	106812	121694	32	24927016688234	20063144496836	151	258937	8478	484918	138960	24	8558942561023	9284820641450	140	0.505703	1
	938563	937676		-	-	CCNA_00859	acetyltransferase, GNAT family	73947	21800	6597	169265	75728	38379	20	388276618767	758432633078	106	68398	1700	128090	27864	16	437639950897	390662893183	87	0.529803	1
	938855	938619		-	hfiA	CCNA_00860	holdfast inhibitor protein HfiA	151112	51201	20950	345896	177861	121880	170	1445257271529	6224322459336	908	27302	8534	51129	139878	30	326855900244	656941140363	402	0.635401	1
938932			939706	+	-	CCNA_R0124	small non-coding RNA	96040	6601	2150	219836	22930	12507	24	1451918750412	617065784166	109	17049	0	31928	0	4	28104516656	22456651844	20	0.0822035	0.666273
	939557	938979		-	-	CCNA_00861	hypothetical protein	1900	0	0	4349	0	0	0	144407293	168105220	2	7450	50	13951	819	2	3332407497	5525347242	12	0.0839826	0.676665
	941471	939696		-	xylD	CCNA_00862	xylonate dehydratase xylD	11052	7550	2250	25298	26227	13089	2	1890176073	30849415270	12	2800	5300	5243	86871	0	267410206358	134906977385	25	0.630947	1
	942333	941464		-	xylC	CCNA_00863	xylonolactonase xylC	32684	7150	2550	74814	24837	14835	8	65567203568	98905952588	43	73678	13249	137978	217161	20	248588303001	2378665487305	204	0.0913196	0.727174
	943204	942458		-	xylB	CCNA_00864	xylose dehydrogenase xylB	8351	0	4249	19115	0	24719	3	7417823838	15919749545	19	4800	50	8989	819	1	1066834227	1865138908	6	0.677847	1
	944646	943210		-	xylA	CCNA_00865	alpha-ketoglutaric semialdehyde dehydrogenase xylA	3900	7950	5752	8927	27616	33463	2	7220988118	36055924080	16	1319	2400	2470	39337	0	39691245124	32892763860	14	0.524815	1
	945817	944663		-	xylX	CCNA_00866	fumarylacetoacetate hydrolase family protein	5902	6250	0	13509	21711	0	1	4964062454	11468086330	10	13800	3500	25843	57367	3	27258576379	113087311886	36	0.69784	1
	946004	946492		+	-	CCNA_00867	hypothetical protein	43687	0	2599	100000	0	15120	17	226919540526	100305643278	78	6099	100	11421	1639	2	1643578250	3706705325	13	0.045581	0.40833
	946747	947268		+	-	CCNA_03889	conserved hypothetical protein	2697	9765	2900	6173	33921	16871	5	8918849302	24492859166	36	16750	2250	31368	36879	7	414683741	76399033628	65	0.606159	1
	950383	947426		-	-	CCNA_00869	DNA modification methyltransferase-related protein	68473	27500	30949	156735	95529	180051	7	136787446278	2207659445408	48	85710	15408	160511	252548	6	356676006305	3392146294248	69	0.579576	1
	950886	950449		-	-	CCNA_00870	conserved hypothetical protein	57808	10705	26048	132323	37186	151538	39	308148319372	983247218223	244	123236	9898	230787	162235	61	175878323327	3011188715930	448	0.618575	1
	951757	950906		-	-	CCNA_00871	carbon-nitrogen hydrolase family protein	25494	11099	13638	58356	38555	79341	10	22024246604	289994056282	68	12021	3669	22512	60137	3	41678072540	111722821174	48	0.560559	1
	952008	951754		-	-	CCNA_00872	glutaredoxin	60836	100	45414	139254	347	264203	75	1946680403657	1827469939111	527	111399	55745	208620	913702	132	47264940093161	34826164579925	2200	0.754714	1
	952834	952037		-	-	CCNA_00873	amidophosphoribosyltransferase family protein	12549	0	9270	28724	0	53929	4	43116235726	49065681154	34	6249	0	11702	0	1	2526901017	2766767015	7	0.329629	1
	952833	953744		+	bioC	CCNA_00874	biotin synthesis protein bioC	28097	42060	71321	64314	146107	414922	28	4288685292344	5808002301788	228	34661	8156	64910	133683	9	177242199985	722270813978	108	0.626175	1
	953924	953751		-	-	CCNA_00875	Flp/Fap pilin component protein	1850	0	0	4234	0	0	1	135411800	156812991	8	1530	0	2865	0	1	86270670	178386707	8	0.499697	1
	954307	953903		-	-	CCNA_00876	7,8-dihydro-8-oxoguanine-triphosphatase	1400	0	0	3204	0	0	0	69361186	75892076	2	0	0	0	0	0	0	244	0	1	1
	954947	954339		-	-	CCNA_00877	hypothetical protein	9948	50	10499	22771	173	61079	6	59175745304	50502888520	45	0	5501	0	90165	1	339512035308	130086395830	74	0.586335	1
	955220	956650		+	-	CCNA_00878	ATP-dependent RNA helicase	2106500	16902	14554	4821800	58714	84670	271	2828489210701480	1009949777122250	1156	1692938	10330	3170414	169316	241	1528397895450440	522346683012165	1166	0.492597	1
	956807	959071		+	-	CCNA_00879	PAS-family sensor histidine kinase	229384	17391	14349	525062	60412	83477	20	10077952096827	6731800545439	98	558120	2750	1045207	45074	50	109371110761117	32376349198339	240	0.680808	1
	960950	959391		-	-	CCNA_00880	conserved hypothetical protein	39567	40711	15401	90569	141421	89597	11	54031628766	987287905168	68	21399	1900	40074	31142	3	1321420134	83175252798	22	0.661544	1
	961699	960947		-	-	CCNA_00881	ABC transporter ATP-binding protein	39366	12099	16536	90109	42029	96201	16	54164548646	493422736192	101	45151	87	84555	1425	12	279371872323	119850918634	57	0.597737	1
	962853	961855		-	-	CCNA_00882	hypothetical protein	366034	401242	375309	837855	1393830	2183425	207	98200480846481	726855575761199	1473	253714	45011	475137	737764	60	4417519749361	42128382909339	607	0.667762	1
	963803	963045		-	-	CCNA_00883	3-demethylubiquinone 3-methyltransferase	33469	0	0	76610	0	0	8	141169086405	42873064114	33	25199	0	47190	0	6	71780082115	38935600189	31	0.516783	1
	964192	963806		-	-	CCNA_00884	VapC-like PIN domain ribonuclease toxin	43923	50	0	100540	173	0	20	270502839866	73222354653	86	9644	50	18060	819	5	6404922681	8520460306	24	0.711365	1
	964730	964182		-	-	CCNA_00885	MazE-like antitoxin protein	748174	6339	15061	1712578	22020	87619	254	226421261571015	79540514448305	1106	429326	7444	804011	122012	161	43636004319259	21807595083043	843	0.548694	1
	964937	966184		+	-	CCNA_00886	aspartokinase	19851	0	750	45439	0	4363	2	36137912243	19511333780	13	21547	0	40351	0	3	49296300753	31358225133	16	0.535586	1
	966367	966831		+	-	CCNA_00887	hypothetical protein	11479	0	7	26275	0	40	4	10803494555	6838133174	18	659	0	1234	0	0	11426688	22365302	1	1.04441e-13	2.9628e-12
	966956	967309		+	-	CCNA_00888	MCP-signal associated domain protein	0	0	0	0	0	0	0	0	356	0	0	0	0	0	0	0	244	0	1	1
	967756	967313		-	-	CCNA_00889	lumazine-binding domain protein	223227	21479	16201	510968	74613	94252	106	8713144059693	6980251175184	510	99947	1389	187173	22766	46	1435399320891	818326107122	236	0.630813	1
	968767	967847		-	-	CCNA_00890	poly(3-hydroxyalkanoate) depolymerase	15025	11210	14409	34392	38941	83826	8	44426769172	227372131198	56	0	4520	0	74086	0	211899903384	90124872520	40	0.559676	1
	968889	969827		+	-	CCNA_00891	transporter, drug/metabolite exporter family	3950	5451	5299	9041	18935	30827	2	4904706967	25874508398	20	0	0	0	0	0	0	244	0	1	1
970059			970156	+	-	CCNA_R0020	complex medium expressed sRNA	118731	1884	1228	271776	6544	7144	225	2773186659715	769691949915	970	8647	0	16193	0	17	5509974199	6456398392	82	6.39852e-06	0.000115655
	970314	972578		+	ptsP	CCNA_00892	phosphoenolpyruvate-protein phosphotransferase PtsP	1463152	245	13865	3349170	851	80662	118	1187871304221180	355355283810971	504	483908	11305	906228	185297	44	49855019053212	32468332394545	240	0.641712	1
	972738	973802		+	-	CCNA_00893	helix-turn-helix DNA-binding protein	71073	6050	3669	162686	21016	21345	13	615619794748	392781830686	64	10450	4100	19570	67202	2	73404243418	121787615020	40	0.578337	1
	973984	975135		+	-	CCNA_00894	1-hydroxy-2-methyl-2-(E)-butenyl 4-diphosphate synthase	344956	449983	516558	789607	1563146	3005166	206	332864353355144	1236776168845460	1550	211973	18500	396968	303228	40	372721017682	12170386306702	303	0.49697	1
	975146	975541		+	-	CCNA_00895	conserved hypothetical protein	32095	17749	29408	73465	61656	171086	36	294190901397	884381584240	257	17566	252	32896	4130	9	21881381993	27815820493	46	0.0563074	0.484243
	975920	975549		-	-	CCNA_00896	conserved hypothetical protein	4778	0	1399	10936	0	8138	3	1024813252	4094608157	17	264	0	494	0	0	1269722	2057229	0	4.21466e-85	2.12554e-83
	976013	976177		+	-	CCNA_00897	hypothetical protein	271886	3450	50	622349	11984	290	302	21035246378792	5996254855048	1282	23226	150	43496	2458	28	51334679431	37454585242	139	7.21088e-05	0.00114616
	977020	976253		-	-	CCNA_00898	ribosomal large subunit pseudouridine synthase F	6235	6950	0	14271	24142	0	3	6337565345	13129984527	16	7247	0	13571	0	1	3606055854	4149787759	8	0.624645	1
	978094	977024		-	-	CCNA_00899	bacterial peptide chain Release factor 1 (RF-1)	10496	1550	2900	24025	5384	16871	2	3435236548	17326373278	14	4043	1250	7571	20488	1	3202963512	18184247828	13	0.475165	1
	978293	980500		+	-	CCNA_00900	CHASE4-family GGDEF/EAL protein	38880	4197	5350	88996	14579	31124	3	104842728370	154873426403	20	31997	1100	59921	18029	3	53935987294	99999288207	17	0.522838	1
	981606	980770		-	-	CCNA_00901	alpha/beta hydrolase family protein	10350	2369	12347	23691	8229	71830	5	70760606149	78284822864	41	0	0	0	0	0	0	244	0	1	1
	981935	982915		+	ibpA	CCNA_00902	inositol ABC transporter, periplasmic inositol-binding protein IbpA	11529	2852	1700	26390	9907	9890	2	3538989673	17270487826	15	8747	0	16380	0	1	5663923240	6573430993	8	0.628765	1
	982938	984485		+	iatA	CCNA_00903	inositol transport ATP-binding protein IatA	14891	8050	0	34085	27964	0	2	16693322519	28507836407	13	9240	0	17304	0	1	6461236245	7177819533	5	0.667139	1
	984482	985480		+	iatP	CCNA_00904	inositol ABC transport system, permease protein IatP	1203	3570	1250	2753	12401	7272	1	693220631	5144923092	7	3191	0	5975	0	0	503471629	680372564	2	0.65572	1
	986396	985509		-	-	CCNA_00905	exonuclease-endonuclease-phosphatase (EEP1) protein	3600	0	0	8240	0	0	0	669390921	785430624	3	150	0	280	0	0	325044	524217	0	3.99928e-57	1
	987380	986466		-	-	CCNA_00906	conserved hypothetical protein	5452	12329	0	12479	42828	0	3	26489489658	23275396885	20	19155	2050	35872	33601	4	49395254	79093761341	37	0.61425	1
	988105	987377		-	-	CCNA_00907	conserved hypothetical protein	13346	46235	24325	30549	160610	141514	20	428211708985	1077626247067	152	100891	60400	188941	990001	44	64203708798141	39406510798027	808	0.0826969	0.668945
	989181	988042		-	-	CCNA_00908	3-oxoacyl-(acyl-carrier-protein) synthase III	17029	20456	3949	38979	71059	22973	6	34153193379	149382496692	38	5549	0	10391	0	0	1899947662	2119976749	4	0.000616321	0.0085635
	990003	989266		-	-	CCNA_00909	conserved hypothetical protein	5097	0	0	11667	0	0	1	1542256357	1634126321	5	0	0	0	0	0	0	244	0	1	1
	991266	990076		-	-	CCNA_00910	erythromycin esterase family protein	2803	3900	2300	6416	13547	13380	1	460212189	10439739729	9	15950	2653	29870	43484	3	3633538751	88267967012	30	0.694705	1
	991919	991329		-	-	CCNA_00911	AAA domain ATPase	2340	0	272	5356	0	1582	0	179911498	535567824	3	237	0	443	0	0	977542	1666517	0	1.37783e-11	1
	992983	991916		-	-	CCNA_00912	beta-lactamase family protein	136982	48998	27345	313553	170208	159084	36	699242040827	6165642858768	200	78859	112958	147681	1851466	36	392789167591174	134244635034911	935	0.751711	1
	993209	993033		-	-	CCNA_00913	hypothetical protein	186220	124516	180828	426259	432542	1051998	503	21557182207768	87405865957654	3598	284	361	531	5917	0	392467087	754284410	18	0	0
	993815	993288		-	-	CCNA_00914	acetyltransferase	8774	0	0	20083	0	0	3	5678623885	4401523854	12	0	1700	0	27864	0	20270679762	17970908430	26	0.643399	1
	993947	994708		+	-	CCNA_00915	Molybdenum cofactor sulfurase related protein	128830	5750	16050	294893	19974	93373	35	2333701286343	1882220024124	178	34479	50	64569	819	9	147746247396	70285168592	42	0.409966	1
	994999	994709		-	parE-1	CCNA_00916	toxin protein parE-1	43459	7680	2650	99478	26678	15416	33	152132655445	177139181033	162	14600	1476	27341	24192	11	108237672	45209014219	88	0.606139	1
	995262	994996		-	parD-1	CCNA_00917	antitoxin protein parD-1	60622	0	0	138764	0	0	41	587379572826	167979156716	173	18148	0	33986	0	13	32650071192	24651405305	63	0.675288	1
	995336	996205		+	-	CCNA_00918	peptide release factor-glutamine N5-methyltransferase	16479	0	3333	37720	0	19390	4	18257328172	24599502960	21	13500	50	25281	819	3	14830121653	16068444404	15	0.582886	1
	996243	996467		+	-	CCNA_00919	hypothetical protein	307533	2440	2436	703946	8476	14171	251	27840225488920	8176606829781	1076	160210	4643	300029	76102	148	3013141406277	2721811245195	835	0.540408	1
	996464	997576		+	-	CCNA_00920	conserved hypothetical protein	113735	100	250	260340	347	1454	18	2637231456728	649701189102	78	137384	1850	257283	30322	25	3112052911895	1515742876303	129	0.600287	1
	997744	998499		+	-	CCNA_00921	zinc metalloprotease	10057	0	12600	23020	0	73302	5	94906747177	66320819581	42	45195	6860	84638	112440	13	20162598349	709187265907	130	0.674771	1
	998598	1001177		+	clpB	CCNA_00922	ClpB protein	287935	142673	175318	659086	495616	1019942	42	10681364976057	119598292951394	280	613768	67393	1149421	1104622	53	63358950235	187900397196373	436	0.603498	1
	1001397	1001729		+	-	CCNA_00923	hypothetical protein	23047	8100	2400	52754	28137	13962	18	20088465733	64110577430	94	7949	0	14886	0	4	4502266935	5672187869	22	0.780548	1
	1002017	1001739		-	-	CCNA_00924	MarR/EmrR family transcriptional regulator	1890	7250	2050	4326	25184	11926	7	4533263034	14637506757	49	0	0	0	0	0	0	244	0	1	1
	1002560	1002018		-	-	CCNA_00925	conserved hypothetical protein	910	0	0	2082	0	0	0	24649506	28521101	1	0	1050	0	17210	0	6377318304	7113472686	15	3.59436e-10	8.34258e-09
	1003636	1002665		-	-	CCNA_00926	acyl CoA thioesterase	6900	0	0	15794	0	0	1	3190330085	2964019784	5	0	0	0	0	0	0	244	0	1	1
	1004418	1003804		-	-	CCNA_00927	hypothetical protein	10391	0	1650	23785	0	9599	3	6124586874	10463919222	18	18097	0	33890	0	5	32429165298	24551142062	27	0.583067	1
	1005102	1004428		-	-	CCNA_00928	GntR family transcriptional regulator	151211	85094	47347	346123	295598	275449	76	88489790389	15449175273364	452	12600	7250	23596	118832	5	387156679513	310822554981	105	0.181329	1
	1005247	1006242		+	-	CCNA_00929	Riboflavin-specific deaminase family protein	749383	521293	508911	1715345	1810862	2960678	324	104198423142199	1844040596402320	2170	493836	35379	924821	579888	107	8498208746834	67871295327543	755	0.694786	1
	1006253	1006870		+	-	CCNA_00930	riboflavin synthase alpha chain	732893	1212053	2340607	1677599	4210417	13616888	1258	2.07439e+16	2.7133e+16	10520	190132	38358	356065	628716	75	4833047160067	25339725867999	796	4.31496e-07	8.54035e-06
	1006846	1008048		+	-	CCNA_00931	GTP cyclohydrolase II/3,4-dihydroxy-2-butanone-4-phosphate synthase	821211	377722	545003	1879760	1312127	3170649	263	223458210957946	1756593713939570	1762	1928580	591074	3611708	9688149	424	8308493610434900	1.12068e+16	5527	0.745094	1
	1008064	1008525		+	ribH	CCNA_00932	6,7-dimethyl-8-ribityllumazine synthase	139127	109058	193027	318463	378844	1122968	173	36578646526163	79383766258694	1313	73998	15475	138578	253646	39	609614039657	2997155760915	424	0.675469	1
	1008616	1010022		+	-	CCNA_00933	M28 Zn-Peptidase	48059	23175	41247	110007	80505	239961	14	673927992133	2180108901276	101	65013	9350	121751	153253	10	27212942900	1394445181622	97	0.50066	1
	1010073	1010594		+	-	CCNA_00934	conserved hypothetical protein	6900	0	150	15794	0	872	2	2991687458	3309382360	10	0	0	0	0	0	0	244	0	1	1
	1011679	1010693		-	-	CCNA_00935	AraC-family transcriptional regulator	2608	0	3200	5969	0	18616	1	3524874140	6072169710	8	0	0	0	0	0	0	244	0	1	1
	1011810	1012649		+	-	CCNA_00936	conserved hypothetical protein	1200	0	400	2746	0	2327	0	40567299	252551765	2	0	0	0	0	0	0	244	0	1	1
	1012924	1012655		-	-	CCNA_00937	acetyltransferase	2701	5400	1800	6182	18758	10471	6	1360497083	11570319171	43	0	2200	0	36059	1	37635425818	26807287520	66	0.58341	1
	1014273	1013086		-	-	CCNA_00938	acetyl-CoA acetyltransferase	67503	23092	10100	154515	80216	58758	15	191743302115	813193141971	82	31046	1750	58140	28683	5	23164153874	121910071805	36	0.631681	1
1014431			1014360	-	-	CCNA_R0125	small non-coding RNA	11143	0	0	25506	0	0	28	10078505732	6471737521	118	0	0	0	0	0	0	244	0	1	1
	1014509	1015012		+	-	CCNA_00939	MarR-family transcriptional regulator	15749	0	0	36049	0	0	5	23120553483	11917408242	23	7300	0	13670	0	2	3669513080	4315241526	13	0.613025	1
	1015105	1017138		+	-	CCNA_00940	sensory box GGDEF/EAL protein	10050	4350	0	23004	15110	0	1	5789955359	12981426734	6	7799	0	14605	0	0	4300983285	5328953985	3	0.614144	1
	1018374	1017151		-	-	CCNA_00941	tRNA (5-methylaminomethyl-2-thiouridylate)-methyltransferase	42495	45316	43040	97271	157418	250392	19	536457336038	3461851755396	137	17701	7400	33149	121291	4	321516278938	380964586550	63	0.623565	1
	1019351	1018428		-	flgL	CCNA_00942	flagellar hook-associated protein FlgL	0	0	0	0	0	0	0	0	356	0	0	0	0	0	0	0	244	0	1	1
	1021466	1019355		-	flaN	CCNA_00943	flagellar hook-associated protein FlaN	12550	0	0	28727	0	0	1	13407603375	7989573242	4	0	0	0	0	0	0	244	0	1	1
	1021586	1021470		-	-	CCNA_03944	hypothetical protein	0	0	0	0	0	0	0	0	356	0	0	0	0	0	0	0	244	0	1	1
	1021867	1023069		+	-	CCNA_00944	flagellar hook length determination protein	8009	761	12656	18332	2643	73628	3	93709606216	63735607118	26	70293	33895	131639	555564	17	13939836322145	11674704375548	285	2.48128e-07	5.01784e-06
	1022922	1023653		+	-	CCNA_00945	chemotaxis protein MotD	0	0	0	0	0	0	0	0	356	0	0	0	0	0	0	0	244	0	1	1
	1023665	1024348		+	flgD	CCNA_00946	Basal-body rod modification protein FlgD	550	0	50	1258	0	290	0	5820030	14738573	0	9139	7649	17114	125372	4	526584418161	311130296786	104	0	0
	1024495	1026270		+	flgE	CCNA_00947	flagellar hook protein FlgE	3849	7450	0	8810	25879	0	1	7691329023	11178050788	6	0	3100	0	50811	0	85716136308	44021970261	14	0.647675	1
	1026439	1026720		+	sciP	CCNA_00948	CtrA inhibitory protein SciP	1900	4012	2100	4349	13936	12217	5	795311412	8892238577	36	0	1177	0	19291	0	8387168826	8932391815	34	0.483127	1
	1026741	1026965		+	-	CCNA_00949	hypothetical protein	0	0	0	0	0	0	0	0	356	0	0	0	0	0	0	0	244	0	1	1
	1026984	1028648		+	fliF	CCNA_00950	flagellar M-ring protein FliF	15350	0	0	35136	0	0	1	21740025971	11423420473	7	5964	0	11168	0	0	2258941467	2476792567	3	0.634996	1
	1028648	1029670		+	fliG	CCNA_00951	flagellar motor switch protein FliG	1250	0	0	2861	0	0	0	52856387	58243207	0	7450	2100	13951	34420	1	9669319458	40449217445	23	5.51971e-45	2.32454e-43
	1029681	1030319		+	flbE	CCNA_00952	flagellar assembly protein FlbE/FliH	0	0	0	0	0	0	0	0	356	0	0	0	0	0	0	0	244	0	1	1
	1030335	1030667		+	fliN	CCNA_00953	flagellar motor switch protein FliN	0	0	0	0	0	0	0	0	356	0	0	0	0	0	0	0	244	0	1	1
	1030701	1032068		+	flbD	CCNA_00954	AAA-family response regulator flbD	4100	0	200	9384	0	1163	0	796686930	1351617539	2	8300	0	15543	0	1	4993989675	6061140012	5	0.656718	1
	1032336	1034438		+	flhA	CCNA_00956	flagellar biosynthesis protein FlhA	5000	6349	357	11445	22055	2076	1	3977176194	11659946034	5	11650	0	21817	0	1	11268654985	11538153826	5	0.519741	1
	1034478	1035959		+	-	CCNA_00957	porin O precursor	5800	10950	12556	13276	38038	73046	3	55740116924	123157763927	27	0	3599	0	58990	0	122640003999	57998600969	19	0.562048	1
	1037278	1035956		-	-	CCNA_00958	conserved hypothetical protein	5769	0	2150	13205	0	12507	1	1951908686	6564684884	6	0	0	0	0	0	0	244	0	1	1
	1037402	1038040		+	-	CCNA_00959	TetR-family transcriptional regulator	2403	10445	7289	5500	36283	42405	5	20457168953	50678328252	43	0	0	0	0	0	0	244	0	1	1
	1038075	1038479		+	-	CCNA_00961	hypothetical protein	1750	0	0	4005	0	0	0	118495141	133807717	3	0	0	0	0	0	0	244	0	1	1
	1038926	1038480		-	-	CCNA_00962	MarR-family transcriptional regulator	6401	0	0	14651	0	0	2	2664010567	2576134654	10	9300	2100	17416	34420	5	6195646581	45693252180	57	0.46943	1
	1039353	1038937		-	-	CCNA_00963	organic hydroperoxide resistance protein	18850	0	0	43147	0	0	8	35590652104	15542628277	34	4386	2950	8213	48352	3	48676990752	53642880026	67	0.62557	1
	1039740	1039648		-	-	CCNA_00964	gluconate kinase	0	0	0	0	0	0	0	0	356	0	0	0	0	0	0	0	244	0	1	1
	1040613	1039915		-	-	CCNA_00965	DnaJ-family chaperone protein	1650	0	0	3776	0	0	0	102880089	114522108	1	0	0	0	0	0	0	244	0	1	1
	1040719	1041387		+	-	CCNA_00966	pyridoxamine 5'-phosphate oxidase	183154	129835	58313	419241	451019	339246	100	266011846130	32122354454548	602	566937	119948	1061719	1966038	208	85888689962919	413103114718851	2262	0.753077	1
	1042019	1041399		-	-	CCNA_00967	TetR-family transcriptional regulator	35278	8249	24753	80751	28655	144004	19	267906900718	608255464534	136	17948	50	33611	819	5	29964496044	25111970111	27	0.283383	1
	1042164	1043663		+	-	CCNA_00968	gluconate kinase	25146	0	0	57559	0	0	3	71076538731	24936602239	12	12950	0	24251	0	1	14524967522	14093856080	8	0.598642	1
	1045882	1044122		-	-	CCNA_00969	two component sensor histidine kinase	8200	5950	0	18769	20669	0	1	5480175387	13635839940	7	0	1850	0	30322	0	24830349320	20676615529	8	0.525677	1
	1046120	1049140		+	-	CCNA_00970	long-chain-fatty-acid--CoA ligase	78182	75742	104012	178959	263111	605107	15	7054709804149	22531045131844	115	191845	190127	359273	3116325	25	1246900797490630	564735730532457	575	0.777596	1
	1050041	1049148		-	-	CCNA_00971	hydroxyacylglutathione hydrolase	24892	3002	2850	56978	10428	16580	6	36895587559	50464165083	31	13351	1300	25002	21307	3	158868833	37870186788	25	0.538888	1
	1050224	1050370		+	-	CCNA_00972	hypothetical protein	8700	0	0	19914	0	0	10	5564612167	4350035596	45	0	0	0	0	0	0	244	0	1	1
	1050782	1050375		-	-	CCNA_00973	putative phosphatase	12764	15850	3950	29216	55059	22979	14	14244404742	84542986342	87	32846	7599	61511	124553	20	143838770958	615092713234	228	0.652321	1
	1051388	1054555		+	-	CCNA_00974	OAR protein precursor	34850	0	1950	79772	0	11344	2	133075832534	58893532552	9	16400	50	30712	819	1	23995555640	22017075259	4	0.630793	1
	1056786	1055002		-	sppA	CCNA_00976	signal peptide peptidase A	410060	47195	101640	938631	163945	591308	56	25898871004157	69602529721511	316	248345	28047	465082	459711	31	389848968	21735681389494	259	0.533457	1
1057036			1056960	-	-	CCNA_R0021	tRNA-Pro	24246	0	0	55499	0	0	57	65123671013	23410359891	240	0	0	0	0	0	0	244	0	1	1
1057201			1057274	+	-	CCNA_R0022	tRNA-Gln	11074	0	864	25348	0	5026	29	8066706418	8827184085	136	9042	0	16933	0	24	6133740341	6927457975	114	0.53957	1
	1057369	1057779		+	-	CCNA_00977	transposase, IS4/5 family	13966	16482	8485	31968	57255	49362	17	7386621759	167388399915	112	4628	68	8666	1114	2	883309213	1851789235	11	9.44044e-05	0.00146632
	1057794	1058162		+	-	CCNA_00978	transposase, DDE family	10189	100	252	23322	347	1466	5	7408732044	6311683866	22	2998	0	5614	0	1	433528631	615810787	7	0.677047	1
	1058314	1059390		+	-	CCNA_00979	RND family efflux transporter, MFP subunit	10350	8099	0	23691	28134	0	3	10745906969	20808903373	16	2550	0	4775	0	0	293968049	445181897	2	0.0054565	0.062262
	1059395	1060600		+	lolE	CCNA_00980	ABC-type transport system involved in lipoprotein release, permease component LolE	3300	0	1350	7553	0	7853	0	570204656	2825914304	4	0	0	0	0	0	0	244	0	1	1
	1060597	1061301		+	lolD	CCNA_00981	ABC-type transport system involved in lipoprotein release, ATPase component LolD	0	0	2299	0	0	13374	0	2140334537	2169269656	6	0	0	0	0	0	0	244	0	1	1
	1061622	1062050		+	-	CCNA_00982	ROS/MUCR transcriptional regulator	157307	13395	2366	360077	46531	13764	73	4737032440913	2037489706389	326	67376	3299	126177	54073	33	198548433321	567586378759	210	0.576383	1
	1063988	1062171		-	-	CCNA_00983	hybrid sensor histidine kinase/receiver protein	2306	8351	0	5278	29009	0	1	11312185253	10957984007	6	0	0	0	0	0	0	244	0	1	1
	1064613	1064062		-	-	CCNA_00984	phosphinothricin N-acetyltransferase	4509	0	2850	10321	0	16580	2	2599290585	7112641550	16	0	0	0	0	0	0	244	0	1	1
	1066802	1064610		-	ptrB	CCNA_00985	protease II PtrB	38789	1344	14113	88788	4668	82104	4	161297355183	287727299198	26	35167	6000	65858	98344	3	29297798053	445703162423	37	0.572157	1
	1066823	1067782		+	-	CCNA_00986	general stress protein 17O	11653	0	450	26673	0	2617	2	10040190456	8270830939	10	21245	0	39786	0	4	47655899707	30763174323	20	0.636341	1
	1067843	1068046		+	-	CCNA_00987	stress response protein CsbD	25315	98588	61232	57946	342474	356227	164	3492330998192	9085284672746	1236	49558	2541	92808	41648	51	87135934086	271874693861	329	0.632733	1
	1069569	1068127		-	-	CCNA_00988	isopenicillin N epimerase	7600	4450	0	17396	15458	0	1	3549820132	10168612290	7	0	0	0	0	0	0	244	0	1	1
	1069657	1071558		+	-	CCNA_00989	acyl esterase protein	9049	0	4001	20713	0	23276	1	7149720189	16006379327	7	8999	0	16852	0	0	6063557304	6875001264	4	0.614586	1
	1072052	1071582		-	-	CCNA_00990	general stress protein 17O	0	0	0	0	0	0	0	0	356	0	8751	0	16388	0	3	5670564541	6578445085	17	1	1
	1072560	1072114		-	-	CCNA_00991	nodulation protein N	11372	0	0	26030	0	0	4	10582602883	6706336362	19	17823	0	33377	0	8	31263494690	24009554485	37	0.626972	1
	1073638	1072625		-	-	CCNA_00992	conserved hypothetical protein	600	7150	2585	1373	24837	15038	1	5904560984	14540553757	13	5698	0	10670	0	1	2024690344	2245114006	5	0.663494	1
	1075248	1073710		-	-	CCNA_00993	long-chain-fatty-acid--CoA ligase	1400	0	1650	3204	0	9599	0	714040464	1969541728	2	0	1600	0	26225	0	17525935072	16202098842	8	0.703077	1
	1077076	1075409		-	-	CCNA_00994	oxidoreductase, GMC family	14635	0	7000	33499	0	40723	2	25636874021	40420300031	14	0	50	0	819	0	4272146	8614684	0	0	0
	1077242	1078576		+	-	CCNA_00995	cytochrome P450 CypX	1600	0	8648	3662	0	50311	1	47318413433	22300298982	13	0	0	0	0	0	0	244	0	1	1
	1078807	1079691		+	-	CCNA_00996	enoyl-CoA hydratase	11758	0	2650	26914	0	15416	2	8187367693	15104703339	15	0	0	0	0	0	0	244	0	1	1
	1079915	1081138		+	-	CCNA_00997	conserved hypothetical protein	4417	0	1749	10110	0	10175	0	1102093895	4463332239	5	650	2550	1217	41796	0	49967454128	34180224080	17	0.701795	1
1081336			1080923	-	-	CCNA_R0126	small non-coding RNA	16592	0	0	37979	0	0	7	26203479015	12914025183	30	11049	0	20691	0	5	9922921601	10373142747	24	0.545155	1
	1081367	1081786		+	-	CCNA_00998	ROS/MUCR transcriptional regulator	15330	0	3499	35090	0	20356	8	15502735889	23371714937	44	9249	3370	17320	55236	6	42455898879	86289559237	86	0.620479	1
	1081984	1082481		+	mopJ	CCNA_00999	PAS-family motility and cell cycle regulatory protein MopJ	23121	13931	30237	52924	48393	175909	24	459871483093	725734174896	185	5940	2149	11124	35223	3	14307430934	37914481243	46	0.714746	1
	1082537	1082725		+	-	CCNA_01000	hypothetical protein	50	0	0	114	0	0	0	23122	24670	0	0	50	0	819	0	4272146	8614684	2	6.84684e-22	1
	1083940	1083029		-	-	CCNA_01001	ribokinase	6150	6000	4799	14077	20842	27919	3	1646241285	29213801816	22	0	2049	0	33584	0	31730858045	24229393888	18	0.550026	1
	1084761	1083961		-	fliP	CCNA_01002	flagellar biosyntheis protein FliP	1344	0	0	3076	0	0	0	62895798	67496878	1	0	0	0	0	0	0	244	0	1	1
	1085081	1084761		-	fliO	CCNA_01003	flagellar biosynthesis protein FliO	1739	0	0	3980	0	0	0	116727701	130276879	4	0	0	0	0	0	0	244	0	1	1
	1085196	1085639		+	flgB	CCNA_01004	flagellar basal-body rod protein FlgB	6400	0	0	14649	0	0	2	2663137830	2576134654	10	0	0	0	0	0	0	244	0	1	1
	1085652	1086071		+	flgC	CCNA_01005	flagellar basal-body rod protein flgC	2042	50	0	4674	173	0	0	164358698	225336958	3	8345	0	15627	0	4	5059009285	6111559670	18	0.385553	1
	1086082	1086393		+	fliE	CCNA_01006	flagellar hook-basal body complex protein FliE	0	0	0	0	0	0	0	0	356	0	0	0	0	0	0	0	244	0	1	1
	1086663	1086496		-	-	CCNA_01007	hypothetical protein	31223	27311	11821	71469	94872	68770	75	9479095413	523855715563	466	34201	3739	64049	61285	45	79150798	234939776827	373	0.532609	1
	1088464	1086800		-	-	CCNA_01008	urocanate hydratase	8551	12800	5045	19573	44464	29350	2	6854180166	62001393154	18	27474	4550	51451	74577	3	12960007603	237454888768	37	0.621717	1
	1089404	1088589		-	-	CCNA_01009	N-formylglutamate deformylase	4900	0	0	11216	0	0	1	1403025951	1520909140	4	4700	1800	8801	29503	1	9935587110	29175334379	23	0.645576	1
	1091064	1089523		-	-	CCNA_01010	histidine ammonia-lyase	63156	49903	29047	144564	173352	168985	16	11422812981	3140260313032	105	56598	2864	105992	46943	7	122934596079	371548784160	49	0.620294	1
	1092254	1091049		-	-	CCNA_01011	imidazolonepropionase	66511	17053	31788	152244	59238	184932	17	358448156872	1739766665423	109	150137	18519	281165	303540	28	11972788529	7939458807083	242	0.653472	1
	1092339	1093718		+	-	CCNA_01012	N-formimino-L-glutamate deiminase	25442	45798	39600	58237	159092	230379	14	705921879553	2452917664538	108	19950	150	37360	2458	2	34802044599	30796999239	14	0.00359607	0.0432058
	1093715	1094422		+	-	CCNA_01013	histidine utilization repressor	2450	5100	7050	5608	17716	41014	3	16307294653	30593501255	30	1400	0	2621	0	0	69676276	151068963	1	9.14313e-13	2.44116e-11
1094527			1094451	-	-	CCNA_R0023	tRNA-Met	26458	2400	1795	60562	8337	10442	72	53678872909	45686736664	343	2026	0	3794	0	5	169276857	300054342	24	1.3671e-09	3.10256e-08
	1095267	1094791		-	-	CCNA_01014	cysteinyl-tRNA(Pro) deacylase	19076	4450	0	43665	15458	0	8	26819517017	26117266518	41	21299	1900	39887	31142	9	1255994001	82731179038	74	0.606559	1
	1095313	1096998		+	-	CCNA_01015	multicopper oxidase PcoA	61087	18095	17529	139828	62858	101978	10	101099002480	875247253800	60	10370	6039	19420	98983	1	251461073877	211278708908	35	0.588285	1
	1096995	1097903		+	-	CCNA_01016	copper resistance protein B	52011	49394	23019	119053	171584	133917	24	43478300153	2095118741187	155	59543	2627	111507	43058	13	175244769233	381752876804	85	0.599786	1
	1098179	1099771		+	-	CCNA_01017	acyl-CoA synthetase	20947	12800	4090	47947	44464	23794	4	7549890647	102733287448	24	52905	21448	99076	351548	9	4018608829814	4164196677106	141	0.0241213	0.239746
	1100821	1099898		-	-	CCNA_01018	D-galactose 1-dehydrogenase	1800	0	0	4120	0	0	0	126825850	143587426	1	0	0	0	0	0	0	244	0	1	1
1101052			1100899	-	-	CCNA_R0127	small non-coding RNA	0	0	0	0	0	0	0	0	356	0	0	0	0	0	0	0	244	0	1	1
	1103268	1100992		-	-	CCNA_01019	beta-glucosidase	8750	0	0	20028	0	0	0	5641371405	4384957561	2	3150	0	5899	0	0	488238666	662664994	1	0.642225	1
	1104375	1103332		-	-	CCNA_01020	LacI-family transcriptional regulator	62677	0	0	143468	0	0	10	636306852508	183489020508	45	13165	0	24654	0	2	15111018774	14517414115	11	0.715249	1
	1105026	1108139		+	-	CCNA_01021	TonB-dependent receptor	19550	0	48	44750	0	279	1	38558381960	16593163997	4	0	4150	0	68021	0	172626408442	75905679426	10	0.64508	1
	1108366	1109898		+	-	CCNA_01022	tryptophan halogenase superfamily protein	1750	7000	0	4005	24316	0	1	7524182144	7786856332	6	0	0	0	0	0	0	244	0	1	1
	1109908	1111458		+	-	CCNA_01023	tryptophan halogenase superfamily protein	1150	4850	3001	2632	16847	17458	1	2611571179	12385010909	7	0	0	0	0	0	0	244	0	1	1
	1112111	1111617		-	-	CCNA_01024	hypothetical protein	79365	95161	222283	181667	330569	1293170	145	74708859276681	78204445498693	1215	33807	3452	63311	56580	15	670123786	216291742215	121	1.56938e-06	3.02401e-05
	1112747	1112124		-	-	CCNA_01025	hypothetical protein	59870	88270	192415	137043	306631	1119407	99	53528906025980	58375220693695	834	70854	42944	132690	703884	37	28513119457630	16989142754953	670	0.536792	1
	1113450	1112731		-	-	CCNA_01026	hypothetical protein	45579	16809	63940	104330	58390	371982	31	3540945662092	4010299029728	247	32048	3998	60017	65530	10	415045017	235703821089	87	0.645088	1
	1114013	1113648		-	-	CCNA_01027	acetyltransferase	0	0	0	0	0	0	0	0	356	0	0	0	0	0	0	0	244	0	1	1
	1114031	1115644		+	-	CCNA_01028	M17 family aminopeptidase	66625	174493	288178	152505	606152	1676525	59	139445355067032	157710416528941	502	22076	2351	41342	38534	3	82208562	104864257315	24	6.11122e-27	2.20923e-25
	1118816	1115733		-	-	CCNA_01029	alpha-L-rhamnosidase	6551	0	3550	14995	0	20652	0	4653669166	11699967569	3	0	0	0	0	0	0	244	0	1	1
	1119501	1118884		-	-	CCNA_01030	peptidyl-prolyl cis-trans isomerase	13449	0	2751	30784	0	16004	4	11214571770	17637021051	25	21207	0	39714	0	6	47449181008	30686427152	32	0.545344	1
	1119701	1121353		+	-	CCNA_01031	transporter, major facilitator superfamily	13198	17847	3193	30210	61996	18575	3	27806088050	91296216689	22	0	0	0	0	0	0	244	0	1	1
	1121440	1122033		+	-	CCNA_01032	RNA polymerase ECF-type sigma factor	6536	49	30986	14960	170	180266	11	999587753204	355490065716	109	12898	0	24154	0	4	14385923744	13992593451	20	0.16584	1
	1121997	1122992		+	-	CCNA_01033	FecR family protein	24269	6600	4211	55551	22927	24498	6	17198537030	76968659641	34	30844	0	57762	0	6	116601822481	55781860564	28	0.533279	1
1123071			1123037	-	-	CCNA_R0128	small non-coding RNA	10874	0	578	24890	0	3362	59	8187811878	7753307748	269	0	0	0	0	0	0	244	0	1	1
	1123256	1126540		+	-	CCNA_01034	TonB-dependent outer membrane receptor	113159	0	2300	259022	0	13380	6	2473351957338	700596132372	27	68094	1000	127521	16390	4	560749040076	318733763810	21	0.535627	1
	1126541	1128433		+	-	CCNA_01035	gamma-glutamyltranspeptidase	39785	0	5099	91068	0	29664	4	158742069407	113423015024	21	40652	1950	76130	31961	4	61241548845	178356269319	28	0.559213	1
1128325			1128505	+	-	CCNA_R0129	small non-coding RNA	2448	0	0	5603	0	0	2	265255270	330455521	10	0	0	0	0	0	0	244	0	1	1
	1132048	1129199		-	-	CCNA_01036	M14 peptidase-family protein	29400	8614	4449	67296	29923	25882	2	28878210820	119653391692	14	60900	5601	114049	91804	4	11806516827	784464784878	36	0.653026	1
	1132891	1132130		-	-	CCNA_01037	GntR-family transcriptional regulator	19576	0	4950	44809	0	28797	5	28494318784	39776657448	32	4399	300	8238	4917	1	122972882	3810154338	8	0.713192	1
	1133387	1132998		-	-	CCNA_01038	glyoxalase family protein	15414	7450	3000	35282	25879	17453	12	3025200532	44947416215	67	7549	2347	14137	38469	5	14641674368	46973085087	67	0.499575	1
	1133616	1134932		+	-	CCNA_01039	putative hexuronate transporter, major facilitator superfamily	1250	6300	0	2861	21884	0	1	6037941277	6142323550	6	0	0	0	0	0	0	244	0	1	1
	1134929	1136569		+	-	CCNA_01040	beta-xylosidase/alpha-L-arabinofuranosidase	5600	0	0	12818	0	0	0	1932961224	1979760369	2	2850	0	5337	0	0	383952332	563006546	1	0.586325	1
	1136704	1136570		-	-	CCNA_01041	hypothetical protein	4350	0	0	9957	0	0	5	1054296856	1192409462	24	0	0	0	0	0	0	244	0	1	1
1136907			1136823	-	-	CCNA_R0130	small non-coding RNA	0	0	0	0	0	0	0	0	356	0	0	0	0	0	0	0	244	0	1	1
	1139762	1137267		-	-	CCNA_01042	TonB-dependent receptor	55382	11401	50	126769	39604	290	4	352097001338	258422847199	22	64446	0	120689	0	5	683543973176	218952300615	24	0.474397	1
	1139944	1139759		-	-	CCNA_01043	hypothetical protein	69664	0	0	159461	0	0	67	820021528376	234785290963	285	28963	0	54239	0	31	100256380782	49652638651	145	0.615945	1
	1140124	1140756		+	-	CCNA_01044	AcrR-family transcriptional regulator	8006	0	15078	18325	0	87718	6	157298818507	82337941397	55	13649	0	25560	0	4	16478210406	15484207200	20	0.685595	1
	1141093	1140749		-	-	CCNA_01045	conserved hypothetical cytosolic protein	66429	104152	67143	152056	361802	390616	125	1884431822745	14828848646027	873	21644	105	40533	1721	12	44903734325	33366220606	61	3.81904e-11	9.51267e-10
	1141746	1141093		-	-	CCNA_01046	peptide methionine sulfoxide reductase msrA	282860	248890	211627	647469	864591	1231176	206	13417235573426	204616682437465	1398	1482499	785516	2776319	12875200	703	2.81203e+16	1.9166e+16	11965	0.264149	1
1141901			1141990	+	-	CCNA_R0024	tRNA-Ser	13515	0	0	30935	0	0	27	16015289156	9121004658	114	4650	650	8708	10653	11	34054240	9005668044	107	0.515031	1
	1142237	1144948		+	-	CCNA_01047	TonB-dependent receptor	74795	0	2300	171206	0	13380	5	889063975069	317658310610	22	48244	6950	90347	113915	4	13562462675	770907976990	37	0.600859	1
	1145106	1145369		+	-	CCNA_01048	hypothetical protein	1750	0	0	4005	0	0	1	118495141	133807717	5	13244	0	24802	0	10	15329644827	14677468659	46	9.7731e-05	0.00151224
	1145454	1145606		+	-	CCNA_03945	hypothetical protein	3485	5031	604	7977	17476	3513	10	1768436901	8104367504	63	2773	0	5193	0	3	359557207	530491108	16	0.816399	1
	1145672	1146154		+	-	CCNA_01049	hypothetical protein	19176	6699	3550	43894	23270	20652	11	7106064598	54758057113	60	0	0	0	0	0	0	244	0	1	1
	1146283	1147911		+	-	CCNA_01050	ABC transporter ATP-binding protein	18810	0	9056	43056	0	52684	3	47335075521	65440111032	19	1050	0	1966	0	0	34943341	77707840	0	3.78652e-63	1.75772e-61
	1148357	1151464		+	-	CCNA_01051	TonB-dependent receptor	10197	0	186	23341	0	1082	0	7715741089	6001850327	2	33299	0	62360	0	2	140132432511	64230235170	10	0.722533	1
	1151554	1152276		+	-	CCNA_01052	SapC family protein	6632	138	3200	15180	479	18616	2	3640231052	10951108510	15	0	0	0	0	0	0	244	0	1	1
	1152201	1153307		+	-	CCNA_01053	acetyltransferase	2499	0	0	5720	0	0	0	278743658	346155060	1	17250	0	32304	0	3	28905409678	22865985974	14	0.00229314	0.0287346
	1153331	1154830		+	-	CCNA_01054	tryptophan halogenase	3100	0	3050	7095	0	17743	0	3034678894	6180614826	5	4598	0	8610	0	0	1209961547	1405070201	2	0.618313	1
	1156148	1154844		-	-	CCNA_01055	GT1 family glyscosyl transferase	30679	0	0	70224	0	0	4	114556529121	36268264529	17	8699	1700	16290	27864	1	2461072187	35428951072	16	0.513817	1
	1157466	1156159		-	-	CCNA_01056	methyltransferase	25304	3450	9749	57921	11984	56716	5	40101421033	129567251417	32	11700	300	21910	4917	1	6186031751	16845452274	10	0.698166	1
	1159047	1157551		-	-	CCNA_01057	conserved hypothetical protein	472383	49256	57130	1081289	171105	332363	70	44386148655880	60283730400844	352	137598	3456	257683	56646	19	2326089349467	1800668084913	104	0.693383	1
	1159429	1159130		-	-	CCNA_01058	helix-turn-helix transcriptional regulator	419052	94197	173994	959214	327220	1012240	415	24804344354280	137408472503316	2554	165661	9777	310238	160252	118	1151557797601	4611477594256	784	0.685629	1
	1159693	1162773		+	rsaA	CCNA_01059	S-layer protein rsaA	2270877	158018	127527	5198061	548921	741910	150	2558524567547360	1845507782576260	702	772839	34524	1447318	565874	53	80766515631927	137157902448989	326	0.652898	1
	1163016	1164752		+	rsaD	CCNA_01060	type I protein secretion ATP-binding protein RsaD	41248	19798	2950	94417	68774	17162	6	106615502826	303521067464	34	30997	6180	58048	101294	4	58214915412	412711121219	45	0.561733	1
	1164820	1166130		+	rsaE	CCNA_01061	type I secretion adaptor protein RsaE	25610	0	150	58621	0	872	3	72960662399	26405589712	15	0	3350	0	54909	0	103254381125	50814133923	20	0.560931	1
	1166270	1167247		+	-	CCNA_01062	GDP-mannose 4,6 dehydratase	5199	5250	2350	11900	18237	13671	2	272140076	15904884120	14	26672	2501	49949	40993	6	1329957641	132000772783	46	0.679951	1
	1167247	1167894		+	perB	CCNA_01063	UDP-perosamine 4-acetyl transferase	1250	0	0	2861	0	0	0	52856387	58243207	1	9148	0	17131	0	2	6307285984	7059310850	13	5.07205e-05	0.000825472
	1167891	1169006		+	-	CCNA_01064	perosamine synthetase	4051	0	0	9272	0	0	0	888527188	1032541990	2	0	0	0	0	0	0	244	0	1	1
	1169010	1170047		+	-	CCNA_01065	glycosyltransferase	9200	6100	0	21058	21190	0	2	6411099836	15060225013	13	450	5701	842	93443	1	361944206345	140351240258	45	0.687215	1
	1170058	1171095		+	-	CCNA_01066	glycosyltransferase	3800	0	0	8698	0	0	0	762186154	891131335	2	0	0	0	0	0	0	244	0	1	1
	1171152	1172735		+	rsaFa	CCNA_01067	type I secretion outer membrane protein RsaFa	441513	33241	41332	1010627	115472	240456	59	44188934739544	42549897484439	287	179115	4936	335433	80904	23	4097636750375	3455975001551	131	0.634981	1
	1174130	1172841		-	-	CCNA_01068	glycosyltransferase	6600	0	50	15107	0	290	0	2802699086	2821664045	3	34196	1500	64039	24586	5	46704215710	126307358986	34	0.00333825	0.0407067
	1174284	1175819		+	-	CCNA_01069	methyltransferase	28632	50	6410	65538	173	37291	4	68793354891	77015622316	22	21399	0	40074	0	2	48488022266	31067714823	13	0.605289	1
1175968			1176304	+	-	CCNA_R0025	small non-coding RNA	2300	0	0	5264	0	0	1	228356114	280817862	5	0	0	0	0	0	0	244	0	1	1
1176250			1176311	+	-	CCNA_R0131	small non-coding RNA	0	0	0	0	0	0	0	0	356	0	0	0	0	0	0	0	244	0	1	1
	1177257	1176508		-	-	CCNA_01070	conserved hypothetical protein	6900	21349	11351	15794	74161	66036	9	63057637621	223637338935	69	0	0	0	0	0	0	244	0	1	1
	1178732	1177299		-	-	CCNA_01071	alpha-ketoglutarate permease	21106	200	6649	48311	694	38681	3	36507962681	54602299333	20	21997	1950	41194	31961	3	1430825978	87777725555	25	0.541265	1
	1179061	1178906		-	-	CCNA_01072	conserved hypothetical protein	6899	2898	2100	15791	10067	12217	13	202604531	12962043341	81	8201	0	15358	0	10	4852518468	5951240810	49	0.605371	1
	1179557	1179165		-	-	CCNA_01073	zinc-finger protein	39686	1500	300	90841	5210	1745	19	193758626372	68580482670	82	0	0	0	0	0	0	244	0	1	1
	1179754	1179617		-	-	CCNA_01074	entericidin B-like protein	208435	7930	4676	477109	27547	27203	290	9875258091449	3956390285981	1284	45302	890	84838	14587	67	186521985966	154122416651	360	0.889907	1
	1180265	1179849		-	-	CCNA_01075	beta/gamma crystallin family protein	293624	2614	13814	672108	9080	80365	134	22210536398668	9243370058328	608	164395	2896	307867	47467	81	4328150531388	2381567270464	426	0.560164	1
	1180887	1180276		-	-	CCNA_01076	beta/gamma crystallin family protein	2109148	86357	93017	4827861	299986	541142	678	2369392417775290	1394294824662250	3087	513835	2131	962273	34928	171	91231162430174	26123464007543	814	0.715719	1
	1183075	1180973		-	-	CCNA_01077	penicillin acylase	24566	16074	2922	56231	55837	16999	3	27988804861	136896251682	20	27438	4563	51383	74791	3	13342534863	237989403797	29	0.577854	1
	1183239	1183991		+	-	CCNA_01078	methyltransferase	89223	30447	18646	204232	105766	108476	33	249576113393	2012295499482	185	105700	8350	197947	136862	30	133354290483	2069207998312	222	0.544893	1
	1184190	1184014		-	-	CCNA_01079	hypothetical protein	18749	0	0	42916	0	0	19	35135056959	15416411629	80	17699	5100	33145	83592	26	84249791034	205680519445	329	0.746738	1
	1184254	1184817		+	-	CCNA_01080	hypothetical protein	2516759	1046205	709748	5760887	3634296	4129082	1374	324641754193365	1.16648e+16	7993	683858	25614	1280680	419832	255	76311070293279	88321942326329	1507	0.797713	1
	1184863	1185642		+	-	CCNA_01081	conserved hypothetical protein	326765	470866	80967	747968	1635689	471039	204	76227462930449	223421633429246	1219	1473355	71265	2759195	1168087	401	333306042960141	707803729001624	2517	0.662312	1
	1186698	1185664		-	-	CCNA_01082	hypothetical protein	4970	4450	0	11376	15458	0	1	2337794808	7078818292	8	0	1750	0	28683	0	21730162840	18866710960	13	0.593362	1
	1186885	1188876		+	-	CCNA_01083	HATPase superfamily protein	130685	25501	17199	299139	88585	100058	15	1499548237057	3155817719131	81	78106	0	146271	0	7	1084285770641	332020498964	36	0.623782	1
	1188873	1190108		+	-	CCNA_01084	hypothetical protein	22469	0	0	51431	0	0	3	54249335067	20553186222	13	13342	0	24985	0	2	15602509479	14872055623	10	0.5707	1
	1191112	1190105		-	-	CCNA_01085	DNA-cytosine methyltransferase	240574	28045	7774	550676	97422	45226	49	11631595762579	7302855845245	229	50847	3474	95222	56941	10	43443405657	366799073624	75	0.668106	1
	1193113	1191305		-	lepA	CCNA_01086	GTP-binding protein lepA	16549	0	13750	37880	0	79993	3	111004093603	106563526149	21	18897	1092	35388	17898	2	6629175978	48071952372	14	0.572211	1
	1193276	1193992		+	-	CCNA_01087	conserved hypothetical protein	1765468	328539	438912	4041174	1141275	2553446	641	612865001900204	2798895861567040	3596	3781247	333035	7081252	5458695	1164	349336459943804	9907208105240690	8744	0.700333	1
	1194555	1194028		-	-	CCNA_01088	conserved hypothetical membrane protein	1871	5900	50	4282	20495	290	2	4683780333	6280985708	15	6950	1500	13015	24586	3	2459541493	28422966471	35	0.653076	1
	1196295	1194604		-	-	CCNA_01089	conserved hypothetical protein	102697	396620	105949	235074	1377774	616376	64	68460486191972	127267925036948	439	491688	103160	920798	1690870	71	58403544277981	263058094488007	771	0.629936	1
	1197659	1196289		-	-	CCNA_01090	conserved hypothetical protein	252432	13500	35313	577819	46896	205439	39	11092989155336	11652570648346	201	349488	12300	654496	201606	53	16336031438140	17912359928724	312	0.600077	1
	1198325	1197735		-	-	CCNA_01091	peptide methionine sulfoxide reductase	114917	18927	17088	263046	65748	99412	46	1138229620582	2146954658387	241	238767	29695	447145	486723	92	47060141774	22266933853574	790	0.707565	1
	1198681	1198379		-	-	CCNA_01092	ACT domain protein	73939	20651	16288	169247	71737	94758	66	198392891924	1105247480177	369	49373	0	92462	0	33	360641652965	135771636274	152	0.638393	1
	1198962	1198666		-	-	CCNA_01093	hypothetical protein	90808	5650	24870	207860	19626	144685	74	902088485667	1468045560227	417	7450	50	13951	819	5	3332407497	5525347242	24	5.92748e-12	1.54228e-10
	1199238	1199089		-	-	CCNA_01094	hypothetical protein	90716	4970	7966	207649	17264	46343	125	1062551627913	694733785069	602	33246	1935	62260	31716	47	25268891563	139568828121	313	0.608897	1
	1201932	1199533		-	-	CCNA_01095	phenylalanyl-tRNA synthetase beta chain	51023	5600	4800	116792	19453	27924	4	227090297263	250245934506	22	63098	3499	118165	57351	5	131938813025	529330191903	36	0.595841	1
	1203163	1202090		-	-	CCNA_01096	phenylalanyl-tRNA synthetase alpha chain	136435	23044	8693	312301	80050	50573	28	2373671097128	2374097911940	137	537114	2401	1005869	39354	101	100754543967723	29230307694880	486	0.716751	1
	1203768	1203412		-	-	CCNA_01097	LSU ribosomal protein L20P	120366	16099	10119	275519	55924	58869	74	1739429620826	1669869230878	364	64476	50	120746	819	36	673231972453	221913973608	170	0.618506	1
	1203984	1203784		-	-	CCNA_01098	LSU ribosomal protein L35P	276734	16871	5090	633447	58606	29611	269	18935435700568	8038611143381	1196	83851	0	157030	0	84	1285648711365	397542512281	390	0.668057	1
	1205296	1204106		-	-	CCNA_01099	tetracycline resistance protein	14747	5250	2250	33756	18237	13089	3	4744602145	31296074454	18	0	0	0	0	0	0	244	0	1	1
	1207291	1205363		-	-	CCNA_01100	acylamino-acid-releasing enzyme	7248	0	3162	16590	0	18395	0	4115705117	11340257664	6	9449	1700	17695	27864	1	1803980354	36997734498	11	0.62897	1
	1207945	1207424		-	-	CCNA_01101	translation initiation factor 3 (IF-3)	48540	55096	10400	111108	191391	60503	39	368929364364	1372129326033	231	110380	26153	206711	428667	53	2949881295206	9708172633973	608	0.674787	1
	1208217	1208816		+	-	CCNA_01102	conserved hypothetical membrane protein	25013	4050	9398	57255	14068	54674	11	33278392157	127792750540	69	0	0	0	0	0	0	244	0	1	1
	1209943	1208972		-	-	CCNA_01103	ADP-heptose--LPS heptosyltransferase	17403	0	0	39835	0	0	3	29382589358	13830989108	13	24058	50	45054	819	5	61461404628	37358491378	23	0.605831	1
	1211112	1209940		-	-	CCNA_01104	glycosyltransferase	16147	0	50	36960	0	290	2	24318583769	12545379698	10	27098	0	50747	0	4	85457247641	43915467869	21	0.635616	1
	1211168	1212040		+	-	CCNA_01105	alpha/beta hydrolase family protein	5350	0	4800	12246	0	27924	2	8922608872	13997664414	15	0	6050	0	99164	1	426592968999	153390881466	56	0.824266	1
	1212099	1212368		+	parD-2	CCNA_01106	antitoxin protein parD-2	13641	0	3050	31224	0	17743	11	11682267064	18984207063	60	41544	0	77800	0	31	238295059300	99631522123	144	0.649681	1
	1212372	1212590		+	parE-2	CCNA_01107	toxin protein parE-2	11014	0	3000	25211	0	17453	11	7352259377	15282338552	64	31988	2250	59904	36879	31	12824579658	146844319344	220	0.697186	1
	1213511	1212651		-	-	CCNA_01108	nucleoside-diphosphate-sugar epimerase	3651	3550	3200	8357	12331	18616	2	818317033	13568990211	15	0	4450	0	72938	1	204104813269	87229468495	42	0.674489	1
1213683			1213757	+	-	CCNA_R0026	tRNA-Gly	57337	12256	17204	131244	42574	100087	210	147000356175	708337298925	1217	41263	27	77274	442	111	231241158935	99419932367	518	0.638069	1
1213808			1213882	+	-	CCNA_R0027	tRNA-Gly	20083	0	48	45970	0	279	48	41137700112	17309123239	205	16434	47	30776	770	44	24213828217	22034733345	210	0.499737	1
	1213981	1215771		+	-	CCNA_01109	conserved hypothetical cytosolic protein	107731	78743	60900	246597	273536	354296	25	249177097794	13437169735784	162	142844	32000	267508	524504	19	4193602653467	15339313869970	221	0.574062	1
	1215774	1216700		+	-	CCNA_01110	2-dehydro-3-deoxygluconokinase	36455	97426	155494	83445	338437	904613	56	31371332174917	39754246216531	476	16850	2500	31555	40976	4	1501747163	86223913593	39	5.34776e-09	1.18084e-07
	1217028	1217396		+	-	CCNA_01111	DnaA-related protein	8424	0	50	19282	0	290	4	5058730012	4245659989	17	11244	7649	21056	125372	10	481732810487	332931995808	198	2.23913e-05	0.000381118
	1217396	1218130		+	-	CCNA_01112	hypothetical protein	427	0	2400	977	0	13962	0	2189065150	2672327433	6	0	2000	0	32781	0	29940378093	23376702940	22	0.710392	1
	1219086	1218139		-	-	CCNA_01113	rhodanese-related sulfurtransferase	0	0	6643	0	0	38646	1	27321554984	13245602411	13	6850	0	12828	0	1	3150253394	3479422383	6	0.631809	1
	1219504	1219079		-	sufE	CCNA_01114	cysteine desulfurase subunit SufE	4000	0	0	9156	0	0	1	862081600	998437029	7	0	0	0	0	0	0	244	0	1	1
	1220338	1219547		-	-	CCNA_01115	two component sensor histidine kinase	1399	0	0	3202	0	0	0	69257311	75370908	1	0	0	0	0	0	0	244	0	1	1
	1220535	1222292		+	divJ	CCNA_01116	histidine protein kinase DivJ	45965	111592	93905	105214	387647	546308	25	6885008596605	22066597202456	197	45854	1950	85872	31961	5	98807460130	209359586722	33	0.0146377	0.156123
	1223195	1222305		-	-	CCNA_01117	conserved hypothetical protein	10494	0	0	24020	0	0	2	8726291240	5822187423	8	9549	1450	17882	23766	2	485264363	32725598401	23	0.674349	1
	1223264	1223593		+	-	CCNA_01118	conserved hypothetical protein	6700	0	0	15336	0	0	3	2972785226	2804514131	15	8300	0	15543	0	5	4993989675	6061140012	23	0.58813	1
	1223722	1224102		+	-	CCNA_01119	hypothetical protein	8840	0	0	20234	0	0	4	5781635208	4447627205	17	19	1000	35	16390	0	5643198455	6601045159	21	0.54109	1
	1224321	1224190		-	-	CCNA_01120	hypothetical protein	0	0	820	0	0	4770	1	180259683	217856225	12	4185	0	7837	0	6	965436348	1154219452	29	0.663971	1
	1224493	1226007		+	-	CCNA_01121	MA superfamily peptidase	9199	0	2450	21056	0	14253	1	4730814145	11515703197	7	0	1849	0	30306	0	24798915601	20658878203	10	0.548988	1
	1226141	1227676		+	-	CCNA_01122	MA superfamily peptidase	33269	5049	21545	76153	17539	125341	7	227592962903	452427934700	47	4200	5750	7865	94246	1	306314637932	161659439223	33	0.558751	1
	1227687	1229291		+	prfC	CCNA_01123	peptide chain release factor RF-3	45147	16300	28795	103341	56622	167519	10	245258197762	1033995030117	68	13200	0	24720	0	1	15208287874	14588275157	7	0.00132507	0.0173421
	1230383	1229340		-	-	CCNA_01124	histidinol-phosphate aminotransferase	4500	0	0	10300	0	0	0	1143572830	1293368919	3	0	0	0	0	0	0	244	0	1	1
	1231227	1230748		-	-	CCNA_01125	conserved hypothetical protein	19449	0	2150	44518	0	12507	8	29264053381	24535189082	39	23600	748	44196	12260	10	28121420357	53460481074	58	0.573773	1
	1231609	1232988		+	-	CCNA_03890	conserved hypothetical protein	41121	2743	3686	94126	9528	21443	6	153427020474	125164277915	30	30007	4438	56194	72742	5	5804345217	248336362528	46	0.586329	1
	1233054	1233356		+	-	CCNA_01128	hypothetical protein	4260	0	804	9751	0	4677	3	710450551	2495543988	15	7105	0	13305	0	4	3438742985	3975417785	21	0.57096	1
	1233504	1233770		+	fliQ	CCNA_01129	flagellar biosynthesis protein FliQ	4496	0	0	10291	0	0	3	1141176125	1288870913	12	0	2350	0	38518	1	44091711226	29405820503	72	0.273969	1
	1233785	1234540		+	fliR	CCNA_01130	flagellar biosynthesis protein FliR	6275	0	0	14363	0	0	1	2540053619	2473816875	6	0	50	0	819	0	4272146	8614684	0	3.65403e-10	1
	1234550	1235635		+	flhB	CCNA_01131	flagellar biosynthesis protein FlhB	0	0	0	0	0	0	0	0	356	0	0	0	0	0	0	0	244	0	1	1
	1235738	1237813		+	cckA	CCNA_01132	sensory transduction histidine kinase/receiver protein CckA	81453	30784	19999	186446	106937	116347	11	135214382106	1900929956190	65	49872	9873	93396	161825	5	175121903617	1205361385239	61	0.506401	1
	1238398	1237868		-	-	CCNA_01133	conserved hypothetical protein	3699	0	0	8467	0	0	1	714505260	835534791	5	0	0	0	0	0	0	244	0	1	1
	1238933	1238520		-	-	CCNA_01134	LuxR-family transcriptional regulator	8438	0	4500	19314	0	26179	5	8288738882	16861051505	36	0	0	0	0	0	0	244	0	1	1
	1239289	1238972		-	-	CCNA_01135	hypothetical protein	6921	0	0	15842	0	0	3	3213649586	2983550666	16	0	0	0	0	0	0	244	0	1	1
	1240290	1239400		-	-	CCNA_01136	conserved hypothetical protein	1850	0	0	4234	0	0	0	135411800	156812991	1	0	1550	0	25405	0	16239403924	15321939476	14	0.000260869	0.00384711
	1240868	1240347		-	-	CCNA_01137	ribosomal-protein-alanine acetyltransferase	0	0	2600	0	0	15125	0	2875566522	2738196653	9	0	0	0	0	0	0	244	0	1	1
	1240937	1241314		+	-	CCNA_01138	hypothetical protein	0	0	0	0	0	0	0	0	356	0	0	0	0	0	0	0	244	0	1	1
	1241418	1243241		+	-	CCNA_01139	conserved hypothetical cytosolic protein	43103	20600	21704	98663	71560	126266	8	44547817209	829451565455	54	16099	6400	30149	104900	2	216493480194	274651010018	37	0.561202	1
	1244899	1243292		-	-	CCNA_01140	PAS-containing EAL phosphodiesterase	12798	0	0	29294	0	0	1	14051520485	8272132852	6	10850	2800	20319	45894	1	16501428718	71997507810	20	0.698839	1
	1245163	1246233		+	recA	CCNA_01141	RecA protein	389551	213402	86177	891686	741313	501349	116	5082243206817	114058533026305	664	2339397	258668	4381057	4239763	492	997840055267	5209048233225320	4024	0.801476	1
1246251			1246366	+	-	CCNA_R0132	small non-coding RNA	0	0	0	0	0	0	0	0	356	0	0	0	0	0	0	0	244	0	1	1
	1246920	1247396		+	-	CCNA_01142	hypothetical protein	18315	0	2000	41923	0	11635	7	25393169812	22001855887	37	6675	3400	12500	55728	4	58156779361	76358168278	71	0.616174	1
1247664			1247598	-	-	CCNA_R0133	small non-coding RNA	0	0	0	0	0	0	0	0	356	0	0	0	0	0	0	0	244	0	1	1
	1248239	1247757		-	-	CCNA_01143	endoribonuclease L-PSP	1500	0	0	3433	0	0	0	81859969	90193870	2	8250	1050	15450	17210	3	26791338	23249833056	33	6.2626e-12	1.61916e-10
	1248661	1248269		-	-	CCNA_01144	cytochrome c oxidase polypeptide II	5694	0	0	13033	0	0	2	2011689920	2049454690	11	0	0	0	0	0	0	244	0	1	1
	1250288	1248684		-	-	CCNA_01145	monoamine oxidase	7013	26068	21800	16052	90554	126825	6	253782362126	516233437343	48	0	1056	0	17308	0	6464821422	7180575232	5	0.00105534	0.0140426
	1250554	1251102		+	-	CCNA_01147	acetyltransferase	28184	52016	28599	64513	180692	166379	35	334338881996	1923577784612	249	50	0	93	0	0	23077	-5668	0	1	1
	1251192	1251368		+	-	CCNA_01148	hypothetical protein	0	0	0	0	0	0	0	0	356	0	0	92	0	1507	0	18460184	38400043	4	1	1
	1254007	1251371		-	-	CCNA_01149	TonB-dependent outer membrane receptor	23244	15618	722	53205	54253	4200	2	49578388305	93029203068	14	97554	8	182692	131	7	1845623959947	588724016575	34	0.647069	1
	1254639	1254289		-	-	CCNA_03891	conserved hypothetical protein	157368	53375	1568	360216	185413	9122	109	3859644537274	4393978650723	526	193923	10400	363165	170463	118	2101313923688	6366892189725	760	0.583735	1
	1254720	1255703		+	-	CCNA_01151	DeoR-family transcriptional regulator	9201	0	4300	21061	0	25015	2	8104200932	17204286900	15	0	2600	0	42615	0	56197110789	33750924253	21	0.56278	1
	1255714	1256535		+	-	CCNA_01152	external DNA uptake/catabolism protein	6600	0	2352	15107	0	13683	1	2576163764	8017813821	11	0	0	0	0	0	0	244	0	1	1
	1256537	1257817		+	-	CCNA_01153	chromate transport protein	50	0	2500	114	0	14544	0	2593146193	2578580022	3	0	50	0	819	0	4272146	8614684	0	1.14634e-10	1
	1257902	1258591		+	-	CCNA_01154	conserved hypothetical protein	660248	154102	387733	1511314	535318	2255704	316	176266229138293	680992211491582	2078	93556	5250	175205	86051	29	330447145462	1263175426592	189	1.54876e-06	2.99843e-05
	1258877	1261810		+	-	CCNA_01155	TonB-dependent outer membrane receptor	256606	116388	85509	587373	404307	497463	28	808799894252	51997205595868	169	230077	22451	430871	367988	17	142969636109	15560083611245	136	0.536284	1
	1261886	1262671		+	-	CCNA_01156	sulfotransferase family protein	13800	5750	7148	31588	19974	41584	6	4804767691	61650471181	39	15906	0	29787	0	4	23791851626	20085860037	18	0.644463	1
	1262857	1264356		+	-	CCNA_01157	protoporphyrinogen oxidase	1250	50	218	2861	173	1268	0	32665334	162271613	0	0	1350	0	22127	0	11656766372	11865865534	7	0.0026965	1
	1264353	1264796		+	-	CCNA_03999	cell surface polysaccharide synthesis protein, GtrA family	649	0	1299	1485	0	7557	0	442521758	972672608	6	0	1700	0	27864	0	20270679762	17970908430	31	0.961522	1
	1264793	1266709		+	-	CCNA_01158	hypothetical protein	15447	0	0	35358	0	0	1	22071149571	11543149503	6	0	2300	0	37698	0	41872409196	28526787033	9	0.592137	1
	1266917	1266961		+	-	CCNA_03946	hypothetical protein	3875	5850	0	8869	20321	0	39	4162894516	8221191748	216	4088	29	7655	475	18	782460947	1241007207	90	0.649587	1
	1266958	1268313		+	-	CCNA_01159	transporter, major facilitator superfamily	85422	780	2450	195531	2709	14253	11	1206812055036	423874683440	52	98059	25	183637	409	14	1861848863267	598669198478	67	0.556323	1
	1268520	1269866		+	-	CCNA_01161	proton/sodium-glutamate symport protein	0	0	0	0	0	0	0	0	356	0	0	0	0	0	0	0	244	0	1	1
	1269938	1272241		+	-	CCNA_01162	beta-D-glucoside glucohydrolase	6200	0	0	14191	0	0	0	2467662105	2416877726	2	0	0	0	0	0	0	244	0	1	1
	1272589	1280028		+	-	CCNA_01163	ice nucleation protein	57107	16550	29949	130718	57491	174233	2	281842176330	1366530912290	16	113295	16299	212170	267152	3	103584144981	4829823801436	32	0.63386	1
	1280183	1282201		+	-	CCNA_01164	O-linked N-acetylglucosamine transferase	17688	26798	14050	40488	93090	81738	5	45838810668	436055008173	35	10150	0	19008	0	1	8094898751	8645779504	4	0.00860046	0.0952111
	1282180	1284618		+	-	CCNA_01165	FkbM methyltransferase family protein	7134	27252	26249	16329	94667	152708	4	402490545975	657250366488	36	50	1948	93	31929	0	27910550062	22559648173	6	0.0699025	0.581571
	1285421	1284624		-	-	CCNA_01166	hydroxyacyl-ACP dehydratase HTD2	1751	0	0	4008	0	0	0	118708278	134498098	1	0	1301	0	21324	0	10667160324	11022039630	13	0.00132454	0.0173421
	1286584	1285421		-	-	CCNA_01167	acyl-CoA dehydrogenase	7950	0	0	18197	0	0	1	4481815824	3830273267	5	4500	0	8427	0	0	1149156553	1338150721	3	0.564973	1
	1287783	1286584		-	-	CCNA_01168	3-ketoacyl-CoA thiolase	2400	0	0	5493	0	0	0	252928362	317939976	1	0	0	0	0	0	0	244	0	1	1
	1288691	1287879		-	-	CCNA_01169	hypothetical protein	943	0	0	2158	0	0	0	26864442	30486015	0	6949	0	13013	0	1	3260392157	3650570124	8	1.94803e-05	1
	1291355	1288710		-	-	CCNA_01170	TonB-dependent receptor	134376	50	6098	307588	173	35476	9	3484408508808	1174935749817	43	15627	3600	29265	59006	1	23703766837	125445376596	16	0.647098	1
1291668			1291593	-	-	CCNA_R0028	tRNA-Lys	62316	50	47	142641	173	273	149	625187671593	182214778050	627	23443	0	43902	0	62	60356818336	35151222665	288	0.635886	1
	1291753	1292091		+	shpA	CCNA_01171	histidine phosphotransferase ShpA	1750	0	3200	4005	0	18616	2	3791359461	5228111337	22	0	0	0	0	0	0	244	0	1	1
	1292202	1293044		+	-	CCNA_01172	AIM24 family protein	197949	31543	98217	453107	109573	571394	70	8166450860640	27561887170748	448	82932	9099	155309	149139	22	543811514	1688003201925	180	0.646708	1
	1293510	1293181		-	-	CCNA_01173	chorismate mutase	11818	0	2152	27051	0	12519	7	8236241651	13700583480	39	0	1950	0	31961	1	28174282674	22491684270	48	0.535988	1
	1294526	1293570		-	-	CCNA_01174	LysR-family transcriptional regulator	9682	6298	4152	22162	21877	24154	3	26588103	34235472996	23	5450	50	10206	819	1	1488772623	2408127376	5	0.821097	1
1294595			1294669	+	-	CCNA_R0134	small non-coding RNA	7228	0	0	16544	0	0	17	3566085483	3265019755	73	0	0	0	0	0	0	244	0	1	1
	1294712	1295635		+	-	CCNA_01175	uroporphyrin-III C-methyltransferase	9591	65287	4349	21953	226793	25301	15	1466908752763	709088368353	98	5049	1729	9455	28339	1	7968738684	28630029338	20	0.229721	1
	1295632	1295991		+	-	CCNA_01176	conserved hypothetical protein	4200	0	100	9613	0	581	2	903333626	1267538895	9	6050	0	11330	0	3	2338383774	2562408873	15	0.60973	1
	1295998	1297656		+	cysI	CCNA_01177	sulfite reductase, beta subunit	16247	13798	7647	37189	47931	44487	4	941948681	138583598529	26	53398	4544	100000	74479	7	16417932132	521073136920	52	0.628528	1
	1297640	1298146		+	-	CCNA_01178	conserved hypothetical protein, DUF934	8500	6332	0	19456	21996	0	5	6207678301	14645252755	27	14350	0	26873	0	5	18583297135	16893767899	26	0.489597	1
	1298146	1298880		+	cysH	CCNA_01179	3'-phosphoadenosine 5'-phosphosulfate sulfotransferase	3519	6817	0	8055	23680	0	2	6215863091	9546164625	14	9328	0	17468	0	2	6609180989	7292032120	11	0.541407	1
	1301185	1299008		-	-	CCNA_01180	penicillin acylase	48930	50	0	112001	173	0	4	350576409904	94063725293	17	12777	0	23927	0	1	14063577316	13746063053	5	0.699992	1
	1301802	1301278		-	-	CCNA_01181	conserved hypothetical protein	82508	4700	2499	188861	16326	14538	31	1003201483102	455502224260	139	43126	4266	80763	69922	18	2103441490	357695941831	143	0.486131	1
	1301993	1302586		+	-	CCNA_01182	glutathione S-transferase	16707	0	0	38242	0	0	5	26641086163	13045318783	21	0	0	0	0	0	0	244	0	1	1
	1302605	1303633		+	-	CCNA_01183	zinc dependent phospholipase C/S1-P1 nuclease-family protein	15446	0	10150	35356	0	59049	4	54346486635	63460122042	30	7049	0	13200	0	1	3373971735	3873403497	6	0.482249	1
	1303641	1304087		+	-	CCNA_01184	MutT/nudix family hydrolase	11170	0	1400	25568	0	8144	5	7557824324	10641732763	25	3400	0	6367	0	1	586418493	733650711	7	0.804305	1
	1304443	1304093		-	-	CCNA_01185	hypothetical protein	1016637	33770	24639	2327092	117309	143341	555	444417313005549	180132876260278	2457	199443	6505	373502	106621	119	4591201781199	4850382421975	683	0.694343	1
	1304705	1305016		+	-	CCNA_01186	conserved hypothetical protein	5598	0	0	12813	0	0	3	1931152083	1974115189	13	0	1900	0	31142	1	26472539566	21586006392	49	0.719679	1
	1305189	1305740		+	-	CCNA_01187	RNA polymerase ECF-type sigma factor	36346	5650	2864	83196	19626	16661	14	95521124709	110345946820	72	7400	0	13858	0	2	3791799299	4551449706	12	0.0647489	0.546486
	1305737	1306660		+	-	CCNA_01188	FecR family protein	4400	0	94	10071	0	546	0	1017177393	1368065674	3	0	1400	0	22947	0	12720559207	12736439341	12	0.708973	1
	1306766	1309666		+	-	CCNA_01189	TonB-dependent receptor	41097	150	10551	94071	521	61382	3	167322263918	223578911903	17	34251	700	64142	11473	2	93432114978	93999184304	13	0.554491	1
	1309772	1311301		+	-	CCNA_01190	hypothetical protein	5548	50	2100	12699	173	12217	0	1748059537	6290295612	5	7350	0	13764	0	0	3730363891	4442069507	4	0.541261	1
	1312558	1311323		-	-	CCNA_01191	transporter, major facilitator superfamily	5744	0	0	13148	0	0	0	2054554988	2087465122	3	3400	700	6367	11473	0	345269288	7561131251	7	0.643278	1
	1313478	1312555		-	-	CCNA_01192	sugar kinase	25266	0	5149	57834	0	29955	5	50932096501	54729651716	31	7200	0	13483	0	1	3550190772	4087700138	7	0.894068	1
	1315289	1313460		-	-	CCNA_01193	amylosucrase	1765	0	2398	4040	0	13950	0	1796352653	3768395219	3	0	0	0	0	0	0	244	0	1	1
1315381			1315307	-	-	CCNA_R0135	small non-coding RNA	60	0	0	137	0	0	0	35945	40276	0	0	0	0	0	0	0	244	0	0	1
	1317953	1315500		-	-	CCNA_01194	TonB-dependent receptor	23483	13843	100	53752	48087	581	2	52112513268	76057824325	13	52353	1350	98042	22127	4	224672664876	217193282688	24	0.602567	1
	1319129	1318104		-	-	CCNA_01195	LacI-family transcriptional regulator	5449	6357	0	12472	22082	0	2	5083117962	11104514532	11	1600	0	2996	0	0	96042696	193065369	1	0.00440409	1
	1319269	1321248		+	-	CCNA_01196	iron-regulated outer membrane virulence protein	49136	102943	196885	112472	357602	1145412	31	57171327033812	62976482859379	271	268024	13480	501936	220947	28	5195392584383	13021892790126	182	0.575059	1
	1321470	1321300		-	-	CCNA_01197	conserved hypothetical protein	1992	0	0	4559	0	0	2	161711745	196047488	8	3968	0	7430	0	4	849448704	1032597563	21	0.662202	1
	1321668	1322570		+	-	CCNA_01198	dTDP-4-dehydrorhamnose reductase	9399	0	1700	21514	0	9890	2	4755389352	9373912069	11	0	0	0	0	0	0	244	0	1	1
	1322567	1323436		+	-	CCNA_01199	glucose-1-phosphate thymidylyltransferase	2400	0	5000	5493	0	29088	1	11316630473	11117893359	13	12150	0	22753	0	2	12463981811	12526232813	13	0.49392	1
	1325734	1323479		-	-	CCNA_01200	TonB-dependent receptor	8446	0	0	19332	0	0	0	5182255031	4172734545	2	0	1450	0	23766	0	13837531671	13577327594	5	0.6231	1
	1326326	1325802		-	-	CCNA_01201	hypothetical protein	7950	0	0	18197	0	0	2	4481815824	3830273267	11	1267	0	2372	0	0	54832651	116984693	2	0.101726	1
	1328746	1326323		-	-	CCNA_01202	membrane alanine aminopeptidase	8240	0	2601	18861	0	15131	0	3969906504	10794489364	4	2000	0	3745	0	0	164077267	292728646	0	0.0337814	1
	1330816	1328834		-	-	CCNA_01203	TonB-dependent receptor	5350	0	0	12246	0	0	0	1732370208	1800581397	2	0	0	0	0	0	0	244	0	1	1
	1331838	1330891		-	-	CCNA_01204	dTDP-glucose 4,6-dehydratase	1499	0	0	3431	0	0	0	81745585	88852594	1	0	0	0	0	0	0	244	0	1	1
	1331972	1332958		+	-	CCNA_01205	ABC transporter ATP-binding protein	6799	0	100	15562	0	581	1	2946700505	3112736067	5	0	2450	0	40157	0	48729396296	31153878222	20	0.72304	1
	1332960	1333697		+	-	CCNA_01206	ABC transporter permease protein	6100	6300	8100	13962	21884	47123	5	14872251411	49394904233	37	0	0	0	0	0	0	244	0	1	1
	1333694	1334875		+	-	CCNA_01207	two-component sensor histidine kinase	5041	0	12450	11538	0	72430	2	103830971787	50444815079	23	8349	0	15635	0	1	5065227227	6116370256	6	0.715193	1
	1334872	1335477		+	-	CCNA_01208	two-component response regulator	8000	50	0	18312	173	0	2	4499045629	3916589681	10	12803	0	23976	0	4	14132798176	13801532835	19	0.633186	1
	1335487	1336638		+	-	CCNA_01209	L-lactate dehydrogenase	3950	5053	5250	9041	17553	30542	2	4818442993	24620309147	16	0	0	0	0	0	0	244	0	1	1
	1336864	1337625		+	-	CCNA_01210	nucleotidyltransferase family protein	17944	0	0	41074	0	0	4	31623890027	14451602156	17	13566	0	25405	0	3	16239403924	15321939476	16	0.47973	1
	1338662	1337787		-	-	CCNA_01211	MobA-like NTP transferase domain protein	16204	14449	400	37091	50192	2327	6	34993906667	56945460894	34	69901	9050	130905	148336	18	6575632508	1434958287289	159	0.0788623	0.641738
	1339720	1338566		-	-	CCNA_01212	dATP pyrophosphohydrolase	9493	0	3050	21729	0	17743	1	5646520207	13652140367	11	0	0	0	0	0	0	244	0	1	1
	1340781	1339720		-	-	CCNA_01213	YjgP/YjgQ family membrane permease	7250	0	3400	16595	0	19780	1	4600029741	12090865337	11	23798	0	44567	0	4	62574324121	35884975742	20	0.61779	1
	1341998	1340778		-	-	CCNA_01214	YjgP/YjgQ family membrane permease	11682	0	50	26740	0	290	1	11143482998	7174792369	7	0	4550	0	74577	0	215285999198	91333856832	30	0.958726	1
	1342432	1341995		-	-	CCNA_01215	histidine triad (HIT) hydrolase	13648	0	2950	31240	0	17162	6	11655333473	18626717508	36	10051	2750	18822	45074	5	17569271520	67248710117	72	0.623765	1
	1343455	1342538		-	-	CCNA_01216	phosphohydrolase, Icc family	8909	0	0	20392	0	0	1	5890580114	4496642513	7	0	0	0	0	0	0	244	0	1	1
	1343532	1344659		+	-	CCNA_01217	phosphatidylglycerophosphate synthase	24955	32950	13430	57122	114461	78131	11	51293904632	590831995428	73	4999	0	9361	0	0	1478895201	1682811065	4	2.26484e-17	6.95629e-16
	1344578	1345570		+	-	CCNA_01218	sphingosine kinase/diacylglycerol kinase-related protein	17669	21871	13850	40444	75975	80574	9	26303907707	361357173006	66	6950	1299	13015	21291	1	1100355863	24983731532	17	0.0206352	0.210737
	1345567	1346448		+	-	CCNA_01219	putative cytosolic protein	4484	0	100	10263	0	581	0	1061473659	1428276248	4	9199	0	17227	0	2	6392447587	7124370381	9	0.669191	1
	1347731	1346517		-	-	CCNA_01220	7-keto-8-aminopelargonate synthetase	22351	50	100	51161	173	581	3	52628900196	20869382409	14	56601	0	105998	0	9	500585672714	172448663142	43	0.672391	1
	1347995	1347735		-	-	CCNA_01221	acyl carrier protein	3422	6548	0	7832	22746	0	6	5632145866	8933536070	39	0	0	0	0	0	0	244	0	1	1
	1349016	1348063		-	-	CCNA_01222	NADH-ubiquinone oxidoreductase	5756	0	0	13175	0	0	1	2064695435	2097489629	4	0	1950	0	31961	0	28174282674	22491684270	16	0.720381	1
	1350724	1349006		-	-	CCNA_01223	acyl-CoA synthetase	20528	6599	50	46988	22923	290	2	30479456181	36244605012	13	50	50	93	819	0	3198982	11440899	0	5.59095e-251	1
	1352060	1350729		-	-	CCNA_01224	O-antigen membrane transport protein	1100	7699	0	2517	26744	0	1	10147444231	8256576755	7	0	0	0	0	0	0	244	0	1	1
	1353184	1352057		-	-	CCNA_01225	glycerophosphotransferase-related protein	2600	0	50	5951	0	290	0	289556679	427485178	1	14100	0	26405	0	2	17816025200	16394260943	11	0.0399816	1
	1353818	1353186		-	-	CCNA_01226	conserved hypothetical protein	14099	0	0	32272	0	0	4	17727055643	9842417405	16	0	2347	0	38469	0	43957213919	29352028247	30	0.613179	1
	1353981	1355048		+	-	CCNA_01227	alkanesulfonate monoxygenase	4648	6648	2950	10639	23093	17162	2	1278385000	20206106257	15	50	0	93	0	0	23077	-5668	0	1	1
	1355045	1355674		+	-	CCNA_01228	pyrazinamidase/nicotinamidase	5750	16947	5250	13161	58870	30542	8	29607519575	76316422170	54	26597	1949	49808	31945	9	6973560332	109518825349	64	0.533687	1
	1357023	1355671		-	-	CCNA_01229	2-hydroxychromene-2-carboxylate isomerase	35183	5900	10250	80534	20495	59631	6	57749484818	238682649019	39	18661	0	34947	0	2	34909832544	25650688796	12	0.686455	1
	1357095	1358750		+	-	CCNA_01230	arylsulfatase family protein	10660	13299	11648	24400	46197	67764	3	25506055643	166637643353	27	5801	3399	10863	55712	1	63528798110	72735767974	20	0.557177	1
	1358738	1359754		+	-	CCNA_01231	Formylglycine-generating sulfatase	2800	21752	8900	6409	75561	51777	5	81229587321	151775242383	43	50	0	93	0	0	23077	-5668	0	1	1
1359047			1359132	+	-	CCNA_R0136	small non-coding RNA	0	0	2800	0	0	16289	5	3435588293	3176370505	63	0	0	0	0	0	0	244	0	1	1
	1360238	1359759		-	-	CCNA_01232	conserved hypothetical protein	6997	6950	8599	16016	24142	50026	8	15802100845	57689602034	62	0	0	0	0	0	0	244	0	1	1
	1361161	1360253		-	-	CCNA_01233	haloalkane dehalogenase	4252	0	4550	9732	0	26470	1	8019866981	11999010562	13	0	0	0	0	0	0	244	0	1	1
	1361248	1362339		+	-	CCNA_01234	metal-dependent hydrolase	249	5550	4499	569	19279	26173	1	7820055249	17171975233	14	8501	0	15920	0	1	5289655119	6289452045	7	0.6337	1
	1362403	1363035		+	-	CCNA_01235	AcrR-family transcriptional regulator	6100	0	2250	13962	0	13089	2	2207233596	7184205237	14	0	0	0	0	0	0	244	0	1	1
	1363332	1363099		-	-	CCNA_01236	general stress protein GsiB	341791	449837	199371	782363	1562639	1159875	768	26248574376016	379862146150816	4992	215042	81348	402715	1333355	257	92011078527556	92360855561100	3709	0.557073	1
	1363481	1363329		-	-	CCNA_01237	hypothetical protein	1438036	987799	573396	3291679	3431406	3335831	3557	445875772521	4795192437225730	21914	2398821	494868	4492342	8111260	3837	2395261795915930	9981900380745370	41188	0.648216	1
	1364364	1363636		-	-	CCNA_01238	EF-hand domain protein	18873	0	100	43200	0	581	4	35128082070	15889664816	20	17398	0	32581	0	4	29503843068	23165141174	22	0.518074	1
	1365904	1364477		-	-	CCNA_01239	two-component sensor histidine kinase	6198	0	68	14187	0	395	0	2386114514	2546569581	3	0	0	0	0	0	0	244	0	1	1
	1366665	1365901		-	-	CCNA_01240	two-component response regulator	12282	5049	2790	28113	17539	16231	4	1423829130	28358367286	26	17100	0	32023	0	4	28305631115	22559648173	20	0.557166	1
	1367472	1366756		-	-	CCNA_01241	Zn-dependent hydrolase, glyoxalase II family	2750	0	0	6294	0	0	0	350653894	440454308	2	5891	0	11032	0	1	2193482696	2411869178	7	0.680379	1
	1369202	1367607		-	-	CCNA_01242	amino acid permease	44591	50575	9599	102069	175686	55843	11	298672386091	1085863581807	69	83549	23251	156464	381101	13	3036121187275	6482507450525	168	0.661606	1
	1369302	1371773		+	-	CCNA_01243	ATP-dependent helicase hrpB	21026	12903	7700	48128	44822	44796	3	75491114	164694410811	18	407	612	762	10031	0	1444251836	2300709917	2	0.000690398	0.00936969
	1372320	1371913		-	-	CCNA_01244	hypothetical protein	2180	1380	0	4990	4793	0	1	191756028	1154261119	7	7551	0	14140	0	3	3979629008	4848382444	17	0.653763	1
	1373421	1372630		-	-	CCNA_01245	23S rRNA methyltransferase	376	0	0	860	0	0	0	2952923	4443971	0	0	0	0	0	0	0	244	0	1	1
	1374338	1373427		-	-	CCNA_01246	methyltransferase	5000	0	100	11445	0	581	1	1388014830	1736901330	4	21426	9100	40125	149155	6	535641767205	642126367649	103	2.51876e-23	8.64634e-22
	1375792	1374356		-	-	CCNA_01247	CESA-like glycosyltransferase	4700	7350	2350	10758	25532	13671	1	2210253952	19612167020	11	4176	0	7820	0	0	960417826	1147930593	2	0.578109	1
	1375993	1376628		+	-	CCNA_01248	TetR-family transcriptional regulator	3789	0	5865	8673	0	34120	2	15744527330	15350544492	22	0	0	0	0	0	0	244	0	1	1
	1376633	1377439		+	-	CCNA_01249	ABC-transporter substrate binding protein	7862	2050	6448	17996	7121	37512	3	11219508286	29025229835	25	6450	2499	12079	40960	2	22091914284	47682893077	32	0.544691	1
	1377382	1378422		+	-	CCNA_01250	FecCD-family transporter protein	6900	0	1108	15794	0	6445	1	2289545061	5082879797	7	0	0	0	0	0	0	244	0	1	1
	1378419	1379177		+	-	CCNA_01251	FepC-type transporter protein	0	0	0	0	0	0	0	0	356	0	0	0	0	0	0	0	244	0	1	1
	1381280	1379181		-	-	CCNA_01252	soluble lytic murein transglycosylase	239473	154469	80849	548156	536592	470353	41	124548101468	57672488443090	246	396466	88317	742473	1447582	46	47269284056413	175049624005218	521	0.665894	1
	1381534	1382418		+	dapA	CCNA_01253	dihydrodipicolinate synthase	60772	6592	15557	139107	22899	90505	17	274612124786	603985838265	95	91163	11450	170723	187674	23	6149400577	2431670743358	202	0.642614	1
	1382418	1382876		+	smpB	CCNA_01254	SsrA-binding protein	121093	177899	297814	277183	617983	1732584	235	130501342215444	186221339239649	1908	1049673	358935	1965753	5883215	622	2897180190525960	4318929463285670	8550	0.780359	1
	1383126	1382977		-	-	CCNA_01255	hypothetical protein	4640	9217	21892	10621	32017	127360	43	319349518306	269416255567	377	0	0	0	0	0	0	244	0	1	1
	1384559	1383564		-	-	CCNA_01256	conserved hypothetical protein	7299	0	0	16707	0	0	1	3650991556	3326035922	5	0	0	0	0	0	0	244	0	1	1
	1385512	1384556		-	-	CCNA_01257	conserved hypothetical membrane protein	3600	0	0	8240	0	0	0	669390921	785430624	2	0	0	0	0	0	0	244	0	1	1
	1386171	1385509		-	-	CCNA_01258	conserved hypothetical membrane protein	3899	0	2600	8924	0	15125	1	2062515650	5836095165	12	0	0	0	0	0	0	244	0	1	1
	1386326	1387099		+	-	CCNA_01259	class II aldolase and Adducin protein	95981	109936	107353	219701	381894	624544	73	5518643487309	33152452326083	528	362602	181607	679055	2976675	142	805066383086390	617364264021224	2361	0.772751	1
	1387138	1387887		+	-	CCNA_01260	conserved hypothetical protein	5100	200	3000	11673	694	17453	2	2705073270	8539960428	13	0	1550	0	25405	0	16239403924	15321939476	16	0.548247	1
1387892			1387617	-	-	CCNA_R0137	small non-coding RNA	4842	0	0	11083	0	0	3	1363427627	1482520710	13	0	0	0	0	0	0	244	0	1	1
	1388006	1389121		+	-	CCNA_01261	periplasmic multidrug efflux lipoprotein precursor	9181	3600	0	21015	12505	0	2	4548194313	10536323884	10	8900	0	16667	0	1	5905026515	6754658073	7	0.562752	1
	1389121	1392264		+	acrB3	CCNA_01262	cation/multidrug efflux pump, AcrB family	70264	25599	60836	160835	88925	353924	9	2130244857177	5369638239066	64	24800	50	46443	819	1	66195438861	39026509787	7	0.000286611	0.00418145
	1392280	1394634		+	-	CCNA_01263	pyruvate dehydrogenase E1 component	10432	0	5699	23878	0	33154	1	14436671521	24539808836	8	7949	2050	14886	33601	0	7798653094	40600359898	10	0.545824	1
	1395261	1394767		-	-	CCNA_01264	transposase, DDE family	36918	28787	64630	84505	100000	375996	47	3278242131054	4504968327163	377	3000	50	5618	819	1	297526619	751257586	6	1.49692e-263	1.199e-261
	1394783	1394905		+	-	CCNA_03947	hypothetical protein	450	0	416	1030	0	2420	1	25264754	91505074	9	0	0	0	0	0	0	244	0	1	1
	1395498	1395376		-	-	CCNA_01265	hypothetical protein	28382	5323	13994	64966	18490	81412	70	68044404384	252531546650	446	0	0	0	0	0	0	244	0	1	1
	1395953	1395597		-	-	CCNA_01266	NTF2 superfamily protein	4800	0	982	10987	0	5712	2	946046866	3322295418	15	0	0	0	0	0	0	244	0	1	1
	1396687	1395950		-	-	CCNA_01267	NTF2 superfamily protein	17457	12197	8829	39959	42369	51364	9	1173466679	151596807790	60	27597	0	51681	0	7	89280823136	45448075610	35	0.597142	1
	1397271	1396765		-	-	CCNA_01268	cytochrome c	32615	7399	3005	74656	25702	17482	15	59740706804	106483442224	77	65041	11446	121804	187608	30	159429803221	1743402309149	305	0.706371	1
	1397552	1398055		+	-	CCNA_01269	GcrA superfamily protein	1465	0	0	3353	0	0	0	77356197	84189193	2	0	1050	0	17210	0	6377318304	7113472686	17	0.00112821	0.0149635
	1398112	1398321		+	-	CCNA_01270	hypothetical protein	0	0	0	0	0	0	0	0	356	0	0	0	0	0	0	0	244	0	1	1
	1398470	1399003		+	-	CCNA_01271	MarR-family transcriptional regulator	27145	0	4596	62135	0	26738	10	60939371274	56033864542	55	13239	0	24793	0	5	15316297698	14667400068	23	0.667292	1
	1399442	1399011		-	-	CCNA_01272	peptidyl-tRNA hydrolase family protein	0	0	0	0	0	0	0	0	356	0	8648	0	16195	0	4	5511607631	6457635794	18	1	1
	1399908	1399447		-	-	CCNA_01273	EMG2 protein	20872	7799	600	47776	27092	3490	11	26873309296	44685120689	56	10100	50	18914	819	4	7192909840	9373268520	21	0.681271	1
1400008			1399934	-	-	CCNA_R0029	tRNA-Thr	18693	0	0	42788	0	0	45	34884079215	15347443125	190	7285	0	13642	0	19	3651500073	4228967695	90	0.642704	1
	1401608	1400085		-	-	CCNA_01274	piperideine-6-carboxylate dehydrogenase	8365	0	2600	19147	0	15125	1	4073208335	10949389381	7	100	7336	187	120242	0	674957783998	218083309356	39	0.0774032	0.631122
	1401717	1402610		+	-	CCNA_01275	bifunctional 5,10-methylene-tetrahydrofolate dehydrogenase/ 5,10-methylene-tetrahydrofolate	8166	6300	6032	18692	21884	35092	4	2845943712	41906025901	28	14200	1886	26592	30912	3	231166553	55317177190	32	0.524386	1
	1402610	1402969		+	-	CCNA_01276	cytochrome c5	714	0	1010	1634	0	5875	0	227131714	633048001	6	0	2505	0	41058	1	51394743403	32106364005	57	0.00460738	0.0540838
	1402986	1404392		+	-	CCNA_01277	FAD-linked oxidoreductase	6244	12090	8723	14292	41998	50747	3	18651871652	84161935554	25	50	99	93	1622	0	19113586	57165672	0	8.98064e-113	4.95756e-111
	1404881	1404393		-	-	CCNA_01278	conserved hypothetical protein	60237	0	0	137883	0	0	22	578469188918	165091896212	93	33350	300	62455	4917	13	115519535450	74476420443	68	0.554069	1
	1405781	1404999		-	-	CCNA_01279	inorganic polyphosphate/ATP-NAD kinase	13748	0	7900	31469	0	45959	5	30931689004	43719359758	32	50	3799	93	62268	0	139136767955	64230235170	39	0.535293	1
	1406898	1405813		-	spmY	CCNA_01280	cell development regulator SpmY	18412	4512	4257	42145	15673	24765	4	8109091584	48990257799	25	7901	3950	14796	64743	2	82259598355	104026494013	36	0.567357	1
	1407064	1408554		+	glpK	CCNA_01281	glycerol kinase	7459	0	0	17073	0	0	0	3845901093	3459795213	3	0	0	0	0	0	0	244	0	1	1
	1408625	1409668		+	-	CCNA_01282	gluconolactonase	4500	0	1700	10300	0	9890	1	1091324757	4434705227	6	14400	0	26967	0	2	18739686890	16992859660	12	0.636715	1
	1409575	1410771		+	-	CCNA_01283	NADP-dependent aldose oxidoreductase	1700	0	0	3891	0	0	0	110560870	123243566	1	0	0	0	0	0	0	244	0	1	1
	1410657	1411604		+	-	CCNA_01284	dienelactone hydrolase family protein	19550	0	0	44750	0	0	3	38847027231	16431514856	15	6900	0	12921	0	1	3205344492	3549172515	6	0.65392	1
	1412590	1411601		-	-	CCNA_01285	proline iminopeptidase	52380	157678	169146	119898	547740	984036	69	33523093234166	66091951071057	556	4450	2550	8333	41796	1	31457173804	42946844178	25	1.27247e-30	4.7255e-29
	1412679	1412939		+	-	CCNA_01286	hypothetical protein	0	50	0	0	173	0	0	62921	85401	0	0	0	0	0	0	0	244	0	0	1
	1413933	1412941		-	-	CCNA_01287	epoxide hydrolase	3621	0	1950	8288	0	11344	1	1108328394	4263931275	6	3682	0	6895	0	0	709980246	868574021	3	0.612784	1
	1414050	1415267		+	-	CCNA_01288	multidrug resistance transporter, Bcr family	27549	15848	4950	63059	55052	28797	7	16149666462	194597096941	40	100	0	187	0	0	123366	250640	0	0	0
	1415635	1415258		-	-	CCNA_01289	conserved hypothetical membrane protein	4906	0	0	11229	0	0	2	1406931945	1524891549	9	0	0	0	0	0	0	244	0	1	1
	1415745	1416851		+	-	CCNA_01290	hypothetical protein	6960	0	0	15931	0	0	1	3257150173	3020094453	4	15949	0	29868	0	2	23947420908	20174116898	13	0.691334	1
	1416848	1417858		+	-	CCNA_01291	phosphotransferase family protein	0	50	0	0	173	0	0	62921	85401	0	0	0	0	0	0	0	244	0	0	1
	1417855	1418280		+	-	CCNA_01292	hypothetical protein	162	0	0	370	0	0	0	390063	556518	0	0	0	0	0	0	0	244	0	1	1
	1418772	1418341		-	-	CCNA_01293	hypothetical protein	370	0	0	846	0	0	0	2838856	4306396	0	850	300	1591	4917	0	123417684	769160540	7	1.85418e-09	1
	1418730	1419224		+	-	CCNA_01294	transposase	9600	8050	17259	21974	27964	100407	12	136813647543	205676516901	101	900	100	1685	1639	0	4259	230208855	3	2.05203e-51	9.11144e-50
	1419994	1419254		-	-	CCNA_01295	integral membrane protein	22400	50	0	51273	173	0	5	53632989193	20561993240	23	47299	0	88578	0	12	325346465894	126194324039	59	0.656481	1
	1422046	1420118		-	stpX	CCNA_01296	stalk-specific protein X	45179	37178	41581	103415	129148	241904	11	480136405578	2922083869422	81	36609	50	68558	819	3	170913780217	78869871854	17	0.0948345	0.747874
	1422990	1422154		-	-	CCNA_01297	23S rRNA Gm2251 methyltransferase	5900	0	2598	13505	0	15114	1	2546078398	7934850350	11	0	0	0	0	0	0	244	0	1	1
1423164			1423249	+	-	CCNA_R0030	tRNA-Tyr	48519	7940	0	111060	27581	0	119	268604801597	167568613978	537	36033	0	67480	0	85	169349602891	74717339999	392	0.554843	1
1423360			1423433	+	-	CCNA_R0031	tRNA-Gly	33429	0	100	76519	0	581	82	139495082319	43375323553	347	17913	3746	33546	61399	59	20251479460	142038013303	641	0.609409	1
	1423488	1424678		+	-	CCNA_01298	translation elongation factor Tu (EF-TU)	275567	57156	19715	630775	198547	114695	53	11527734942629	16812733436281	264	241841	46815	452902	767333	49	6804948797692	42701999067150	512	0.646293	1
	1424774	1425400		+	-	CCNA_01299	OmdA-family protein	9395	0	0	21505	0	0	2	6691895735	4845170387	11	12700	0	23783	0	4	13861299015	13593533933	18	0.60106	1
	1425640	1426458		+	fdhD	CCNA_01300	formate dehydrogenase accessory protein fdhD	13600	5250	4950	31130	18237	28797	5	1616979551	44483625677	31	0	0	0	0	0	0	244	0	1	1
	1426458	1428746		+	-	CCNA_01301	NAD-dependent formate dehydrogenase alpha subunit	53517	65747	13327	122500	228391	77532	10	541610226629	2149782233110	62	59900	13153	112176	215587	6	471763325403	1972646549942	71	0.463899	1
	1428800	1429948		+	-	CCNA_01302	acetyltransferase domain protein	2399	0	3310	5491	0	19256	0	3904915429	6143739540	7	0	0	0	0	0	0	244	0	1	1
	1430061	1430900		+	-	CCNA_01303	conserved hypothetical protein	1595896	2649758	9250462	3653022	9204703	53816173	2915	7.15123e+17	6.21211e+17	26457	203743	23026	381555	377413	54	208962440	14289196772510	451	1.00908e-195	7.23176e-194
	1431129	1431329		+	-	CCNA_01304	hypothetical protein	1696948	32210	24635	3884331	111890	143318	1583	1610738264076180	617591312256254	6864	195925	131	366914	2147	197	9718546221165	2606891662661	918	0.00342042	0.0414612
	1431343	1431651		+	rpsJ	CCNA_01305	SSU ribosomal protein S10P	617954	14668	187	1414503	50953	1087	371	147929828971709	50148644961477	1582	291865	1549	546584	25389	192	22885720146336	7532376479788	925	0.599111	1
	1431629	1432432		+	rplC	CCNA_01306	LSU ribosomal protein L3P	632611	23000	7137	1448053	79897	41520	149	147569245800757	58938152178686	650	264982	5348	496239	87657	68	12759514715285	7913255450238	363	0.608697	1
	1432432	1433070		+	rplD	CCNA_01307	LSU ribosomal protein L1E-L4P	187277	8720	213	428679	30291	1239	55	8080697991556	2669440990833	240	91544	2350	171437	38518	29	861733470876	818457678772	164	0.566465	1
	1433070	1433366		+	rplW	CCNA_01308	LSU ribosomal protein L23P	139198	6832	9798	318625	23732	57001	95	3160009628029	1774579857967	448	63891	1810	119650	29667	44	337869608953	349569938767	251	0.594999	1
	1433370	1434209		+	rplB	CCNA_01309	LSU ribosomal protein L2P	298322	23329	23912	682862	81040	139112	74	17808958254234	14758127598277	358	115995	1450	217227	23766	28	2121232308140	1072529057884	143	0.649929	1
	1434213	1434491		+	rpsS	CCNA_01310	SSU ribosomal protein S19P	14052	0	0	32165	0	0	9	17586322341	9782777144	38	7400	0	13858	0	5	3791799299	4551449706	24	0.589918	1
	1434494	1434874		+	rplV	CCNA_01311	LSU ribosomal protein L22P	38036	0	0	87064	0	0	18	191896552735	53867355715	76	16552	2700	30997	44255	10	3409661300	93057387616	98	0.54781	1
	1434874	1435626		+	rpsC	CCNA_01312	SSU ribosomal protein S3P	38687	6050	747	88554	21016	4345	10	143948485112	97705610235	50	31150	1800	58335	29503	8	22002065413	124389974584	58	0.52894	1
	1435640	1436071		+	rplP	CCNA_01313	LSU ribosomal protein L16P	48038	12981	8850	109959	45093	51486	29	84685124114	398878062874	159	39899	0	74720	0	18	216278065780	91711205676	86	0.604972	1
	1436077	1436268		+	rpmC	CCNA_01314	LSU ribosomal protein L29P	6769	0	694	15494	0	4037	7	2356739761	4232879805	33	7500	0	14045	0	7	3915761141	4745642007	36	0.516416	1
	1436279	1436518		+	rpsQ	CCNA_01315	SSU ribosomal protein S17P	1122	3700	5767	2568	12853	33550	8	11897347765	18986133632	68	5439	0	10185	0	4	1810800018	2029253752	21	0.684826	1
	1436536	1436904		+	rplN	CCNA_01316	LSU ribosomal protein L14P	5250	0	0	12017	0	0	2	1655636713	1731817390	10	7250	0	13577	0	3	3609883374	4182489792	18	0.610572	1
	1436904	1437218		+	rplX	CCNA_01317	LSU ribosomal protein L24P	5200	0	0	11902	0	0	2	1617865301	1702870104	12	7401	0	13860	0	4	3793112798	4552694115	22	0.615701	1
	1437211	1437768		+	rplE	CCNA_01318	LSU ribosomal protein L5P	16550	0	0	37883	0	0	5	26044796512	12865878053	22	14599	0	27339	0	5	19366106056	17398743526	24	0.512866	1
	1437790	1438095		+	rpsN	CCNA_01319	SSU ribosomal protein S14P	4450	0	0	10186	0	0	2	1113430982	1260263797	11	17250	0	32304	0	11	28905409678	22865985974	52	0.970026	1
	1438106	1438504		+	rpsH	CCNA_01320	SSU ribosomal protein S8P	40049	0	6300	91672	0	36651	21	156251989298	134620814223	107	6199	0	11609	0	3	2478971626	2715417092	14	0.00506646	0.0587883
	1438523	1439056		+	rplF	CCNA_01321	LSU ribosomal protein L6P	10556	0	14049	24162	0	81732	8	124598827866	82082849776	66	0	1800	0	29503	0	23251064239	19772190866	27	0.664744	1
	1439060	1439410		+	rplR	CCNA_01322	LSU ribosomal protein L18P	11193	0	0	25620	0	0	5	10186955178	6522490852	24	9800	0	18352	0	5	7440535044	7977721931	26	0.513505	1
	1439421	1440026		+	rpsE	CCNA_01323	SSU ribosomal protein S5P	85876	92109	59645	196571	319967	346995	71	588726363223	12973813432759	474	101006	19311	189156	316521	40	777829204276	5554869629773	417	0.517339	1
	1440030	1440215		+	rpmD	CCNA_01324	LSU ribosomal protein L30P	0	0	0	0	0	0	0	0	356	0	10282	2000	19255	32781	13	3577424892	46031212185	139	1	1
	1440388	1440873		+	rplO	CCNA_01325	LSU ribosomal protein L15P	6523	0	0	14931	0	0	2	2787839989	2664893704	10	23644	2	44278	32	9	61498091909	35601315284	45	0.829958	1
	1441093	1442448		+	secY	CCNA_01326	protein translocase subunit secY	30985	56098	47861	70924	194872	278439	18	1109133220824	4191538869648	133	55245	3700	103458	60645	8	56825804326	445031101131	60	0.627397	1
	1442583	1443158		+	adk	CCNA_01327	adenylate kinase/nucleoside-diphosphate kinase	22927	0	0	52480	0	0	7	56942912615	21252575719	30	14150	0	26499	0	4	17968621902	16493355494	23	0.562989	1
	1443405	1443773		+	rpsM	CCNA_01328	SSU ribosomal protein S13P	188478	22969	6863	431428	79789	39926	107	6310050067385	4324128406938	497	242587	95	454299	1557	133	16323222078094	4278011811948	617	0.446119	1
	1443787	1444176		+	rpsK	CCNA_01329	SSU ribosomal protein S11P	166593	1000	3342	381333	3473	19442	79	6187509972274	1832885638567	345	300312	3500	562403	57367	158	21219620527038	9136650987855	794	0.659858	1
	1444254	1445270		+	rpoA	CCNA_01330	DNA-directed RNA polymerase alpha chain	73342	19835	250	167880	68902	1454	16	652614950972	538069662287	78	16746	0	31360	0	3	26919471843	21828557978	15	0.254501	1
	1445475	1445888		+	rplQ	CCNA_01332	LSU ribosomal protein L17P	17954	0	102	41096	0	593	7	31124950990	14767592111	33	11300	0	21161	0	5	10472511733	10851330482	25	0.560661	1
	1446724	1446332		-	-	CCNA_01333	hypothetical protein	8399	3800	3750	19225	13200	21816	7	561243179	22493367252	46	30799	0	57678	0	15	116195274877	55626236505	73	0.586778	1
	1447721	1446891		-	-	CCNA_01334	ABC2-family membrane transporter	14010	7150	3535	32069	24837	20565	5	1083779926	43763820749	31	0	1750	0	28683	0	21730162840	18866710960	17	0.621048	1
	1448638	1447721		-	-	CCNA_01335	ABC-type multidrug transport system, ATPase component	343324	171458	331824	785872	595609	1930443	167	114958923901620	321355021762406	1202	521647	421067	976903	6901606	208	7819226757629730	4351267223057750	4291	0.755707	1
	1448810	1450039		+	-	CCNA_01336	phosphodiesterase I/nucleotide pyrophosphatase	9150	5550	2050	20944	19279	11926	2	683422387	21027343299	14	21200	0	39701	0	3	47411912694	30671360042	16	0.522888	1
	1450109	1451731		+	-	CCNA_01337	GMC family oxidoreductase	1050	5700	7448	2403	19800	43330	1	22399494653	31724572244	13	0	0	0	0	0	0	244	0	1	1
	1451802	1452257		+	-	CCNA_01338	glyoxalase family protein	63847	0	1491	146146	0	8674	26	620874646850	219887440572	113	89908	4289	168373	70299	41	415425678467	1052220774939	261	0.652751	1
	1452254	1452583		+	-	CCNA_01339	ArsR-family transcriptional regulator	0	0	0	0	0	0	0	0	356	0	0	0	0	0	0	0	244	0	1	1
	1452580	1453074		+	-	CCNA_03880	ligand-binding SRPBCC domain protein	13500	47197	11901	30901	163952	69236	26	403151064199	659124069271	177	33749	22297	63202	365464	22	6189912774330	3703683756659	432	0.66068	1
	1453071	1454321		+	-	CCNA_01340	major facilitator superfamily transporter	12167	0	3601	27850	0	20949	2	9717037277	18878546245	13	7952	1801	14891	29519	1	4317256869	35711978481	17	0.55937	1
	1454414	1455832		+	-	CCNA_01341	DegP/HtrA-family serine protease	406684	174446	172893	930903	605988	1005835	96	6108030848604	173460709609933	597	280820	15935	525899	261186	42	4502198646309	15182722729222	277	0.642485	1
	1455951	1457252		+	-	CCNA_01342	ATPase, AAA family	54958	20200	7727	125799	70170	44953	11	120206612903	550313722966	61	20493	471	38377	7720	3	25493835257	37617921524	17	0.802697	1
	1457249	1458061		+	-	CCNA_01343	ribosomal large subunit pseudouridine synthase C	57496	30897	11116	131608	107329	64669	22	74489458082	869142913000	124	85391	19634	159914	321816	26	1383468636549	4892043585911	296	0.657621	1
	1458048	1458584		+	-	CCNA_01344	conserved hypothetical protein	301860	245002	242286	690960	851085	1409540	266	24204054892556	241189360640317	1832	127945	32997	239606	540845	60	6139752697371	14973900402224	726	0.66718	1
	1458745	1459527		+	-	CCNA_01345	short chain dehydrogenase	90021	244015	180138	206059	847656	1047984	119	34982000323476	109651557914906	894	82009	5575	153580	91378	22	139281823054	1108426752564	156	0.0350356	0.330532
	1459714	1460394		+	-	CCNA_01346	outer membrane protein	9848	12800	0	22542	44464	0	6	27088331512	33091745984	32	0	2200	0	36059	0	37635425818	26807287520	26	0.547879	1
	1460358	1461083		+	-	CCNA_01347	conserved hypothetical protein	13820	670	0	31634	2327	0	3	15525304461	10777762698	15	3726	0	6977	0	1	730413768	895219918	4	0.678777	1
	1461471	1462034		+	-	CCNA_01348	conserved hypothetical protein	73979	0	2300	169338	0	13380	24	865146882152	311462172514	107	53846	50	100838	819	19	435473793627	160389574745	90	0.526524	1
	1462307	1462717		+	-	CCNA_01349	transposase	17432	16169	9807	39902	56167	57053	19	3660759356	214453705790	124	4930	34	9232	557	2	1232000183	1855347466	11	9.90524e-06	0.000175926
	1462732	1463100		+	-	CCNA_01350	transposase DDE domain protein	11365	50	468	26014	173	2722	5	9299712537	8075207584	26	2349	0	4399	0	1	241442400	386632563	5	0.610053	1
	1463956	1463228		-	-	CCNA_01351	two-component response regulator protein	45105	26548	10702	103245	92222	62260	20	24191434009	628747235606	117	29247	7650	54771	125389	10	188869137820	566845723691	123	0.485257	1
	1465588	1463957		-	-	CCNA_01352	two component sensor histidine kinase	166162	81609	105988	380346	283492	616603	39	3641750904194	36638622613432	261	359222	100344	672725	1644713	57	102129257135549	200132260315180	709	0.709307	1
	1467880	1465853		-	-	CCNA_01353	myo-inositol-hexaphosphate 3-phosphohydrolase	1165257	3378	9296	2667285	11734	54081	105	687357544040456	202964221072536	449	174237	250	326298	4097	17	7215534819454	2008293317499	81	0.0447164	0.403238
	1469198	1468212		-	idhA	CCNA_01354	myo-inositol 2-dehydrogenase IdhA	15349	0	0	35134	0	0	2	21737056119	11421729332	11	0	1549	0	25389	0	16214868667	15304295470	12	0.51335	1
	1469366	1470241		+	iolR	CCNA_01355	transcriptional regulator IolR	15548	10181	0	35589	35366	0	5	22251390673	37011370279	26	11402	1900	21352	31142	3	1646806094	46812740728	29	0.519033	1
	1470370	1472298		+	iolC	CCNA_01356	5-dehydro-2-deoxygluconokinase IolC	13350	0	6246	30558	0	36337	1	19836580416	32981493332	11	20522	0	38432	0	2	43855813460	29313360436	9	0.53398	1
	1472300	1474144		+	iolD	CCNA_01357	myo-inositol catabolism protein IolD	52999	26150	14479	121315	90839	84234	9	20460956966	828909475009	53	64893	4250	121527	69660	7	90053939256	658491445706	51	0.502369	1
	1474148	1475047		+	iolE	CCNA_01358	myo-inositol catabolism protein IolE	1050	8250	800	2403	28658	4654	2	9795409021	11737956481	13	0	5050	0	82773	1	276501107707	112027571551	45	0.696973	1
	1475044	1475853		+	iolB	CCNA_01359	myo-inositol catabolism protein IolB	9538	5549	3850	21832	19276	22398	4	53747731	29830189188	26	22799	6400	42696	104900	7	139292571386	339643320325	91	0.923496	1
	1475884	1477386		+	iolA	CCNA_01360	malonate-semialdehyde dehydrogenase IolA	6100	10847	2450	13962	37680	14253	2	8342334582	32045811814	14	15848	14060	29679	230454	4	2318820484095	1252384338579	86	0.0187561	0.193972
	1477574	1477915		+	-	CCNA_01361	PepSY superfamily protein	326015	5050	1600	746251	17542	9308	176	31879090582822	9624723804969	753	129987	4350	243430	71299	79	1602602535675	1805474011718	460	0.584141	1
	1477912	1478580		+	-	CCNA_01362	two-component response regulator	387146	13705	11447	886181	47608	66594	111	42883565000422	19853760301635	498	70064	16349	131210	267972	26	922743658149	3124779201007	298	0.589398	1
	1478577	1479935		+	-	CCNA_01363	two-component sensor histidine kinase	83229	29800	10103	190512	103518	58775	16	382292908758	1268794290828	86	19598	0	36701	0	2	39263676255	27476689802	13	0.020572	0.210618
	1480166	1481191		+	-	CCNA_01364	NIFR3-like protein	1850	0	0	4234	0	0	0	135411800	156812991	1	0	0	0	0	0	0	244	0	1	1
	1481714	1481196		-	perP	CCNA_01365	aspartyl protease perP	12578	15654	0	28791	54378	0	9	43968991616	49602506053	53	4348	0	8142	0	1	1058080329	1247885334	7	0.00864525	0.0954482
	1482244	1482020		-	-	CCNA_01366	conserved hypothetical protein	2027	0	0	4639	0	0	1	168605976	203486575	6	34	1650	63	27044	1	18763044413	17144743156	60	0.000725713	0.00975177
	1482331	1483221		+	-	CCNA_01367	nicotinate-nucleotide--dimethylbenzimidazole phosphoribosyltransferase	6113	19749	3150	13992	68603	18325	5	57199953980	73551519001	37	7550	1651	14139	27061	2	3205939875	32255217804	23	0.596235	1
	1483373	1484587		+	-	CCNA_01368	acyl-CoA dehydrogenase	215015	103740	32540	492171	360371	189307	52	2725423086966	22222017771800	285	431983	50349	808987	825258	80	5573887454	81380393227304	672	0.683731	1
	1484714	1485853		+	-	CCNA_01369	acyl-CoA dehydrogenase, short-chain specific	18459	0	726	42252	0	4223	3	30224663400	17446466059	13	25249	50	47284	819	4	69161796392	40089756138	21	0.584237	1
	1486209	1486346		+	-	CCNA_03948	hypothetical protein	0	0	0	0	0	0	0	0	356	0	0	0	0	0	0	0	244	0	1	1
	1486729	1486421		-	-	CCNA_01371	hypothetical protein	5450	0	50	12475	0	290	3	1761903238	1960415141	13	17056	0	31941	0	11	28131988214	22469796695	51	0.72212	1
	1487439	1486831		-	-	CCNA_01372	lysine decarboxylase family	17978	0	0	41151	0	0	5	31766358906	14491396635	22	2332	50	4367	819	0	144120138	528911755	4	0.0660947	0.556695
	1487512	1488318		+	-	CCNA_01373	conserved hypothetical protein	63643	195303	251691	145679	678441	1464256	114	93786520121261	135879747737536	945	17350	0	32491	0	4	29308621563	23069346734	20	2.92885e-133	1.78572e-131
	1488246	1490177		+	-	CCNA_01374	Fe-S cluster assembly ABC-type transport system, permease and ATPase components	20177	114301	55652	46185	397057	323765	17	4382054022359	9422439812289	132	8949	1200	16759	19668	1	89484743	27187063425	9	6.56096e-10	1.49729e-08
	1490238	1490675		+	-	CCNA_01375	lactoylglutathione lyase	32739	34446	127855	74939	119658	743818	80	23698293933070	16523628317283	714	27348	3453	51215	56597	14	391767918	177558233061	123	0.0168268	0.176703
	1490853	1491557		+	-	CCNA_01376	glutathione S-transferase	9180	26631	6933	21013	92510	40333	11	91891007436	216797354493	72	7549	5745	14137	94164	3	254995016718	178965921465	76	0.48104	1
1491642			1491707	+	-	CCNA_R0032	cell cycle regulated sRNA	0	0	0	0	0	0	0	0	356	0	0	0	0	0	0	0	244	0	1	1
1491776			1491850	+	-	CCNA_R0033	tRNA-Asn	5889	1372	0	13479	4766	0	17	1597325061	3844640816	81	0	1850	0	30322	5	24830349320	20676615529	202	0.67366	1
1491986			1492060	+	-	CCNA_R0034	tRNA-Asn	5986	784	0	13702	2723	0	16	1842233406	3221407464	73	0	1150	0	18849	3	7933338064	8489156635	125	0.612393	1
	1492239	1492093		-	-	CCNA_01377	hypothetical protein	164	0	0	375	0	0	0	402837	593805	0	0	693	0	11358	0	2352277094	2575803108	38	1.60545e-257	1.2612e-255
	1492535	1493107		+	-	CCNA_01378	protein-L-isoaspartate O-methyltransferase	1400	0	2250	3204	0	13089	1	1590395155	3180007990	9	3836	0	7183	0	1	783245836	959630170	6	0.573756	1
	1493232	1494683		+	rsaFb	CCNA_01379	type I secretion outer membrane protein rsaFb	199535	16518	42106	456737	57380	244958	32	5265416083422	9163569671410	174	81358	11900	152361	195049	13	56428427016	2255801926891	119	0.563494	1
	1494812	1495345		+	popZ	CCNA_01380	pole-organizing protein popZ	60395	0	6094	138244	0	35452	22	451595142715	281586853504	108	139494	50	261234	819	53	4328748917417	1270802538262	245	0.651235	1
	1495472	1498192		+	-	CCNA_01381	valyl-tRNA synthetase	22249	21398	24913	50928	74332	144935	4	179953819063	689336707825	33	32500	1900	60863	31142	2	23665528538	134631903493	16	0.611489	1
	1498487	1500238		+	-	CCNA_01382	long-chain-fatty-acid--CoA ligase	5933	50	1282	13580	173	7458	0	1529077253	4752008875	4	20947	0	39228	0	2	46067517035	30167529528	11	0.685062	1
	1500243	1500605		+	-	CCNA_01383	conserved hypothetical protein	10780	0	1014	24675	0	5899	5	7315266615	8931881444	28	0	0	0	0	0	0	244	0	1	1
	1502186	1500699		-	-	CCNA_01384	amidase family protein	129124	0	407	295566	0	2367	15	3571647066354	837325933352	66	109358	50	204797	819	14	2408596191649	782467173960	69	0.489853	1
	1502307	1503038		+	-	CCNA_01385	rRNA methylase	11054	0	2049	25302	0	11920	3	7009375592	12531539601	16	50	0	93	0	0	23077	-5668	0	1	1
	1503747	1503106		-	-	CCNA_01386	conserved hypothetical protein	21281541	662458	609008	48713669	2301240	3543010	6374	6.51068e+17	5.39506e+17	28327	10469331	389637	19606223	6386444	3431	5.36664e+16	3.12764e+16	20243	0.569646	1
	1503930	1505177		+	-	CCNA_01387	tRNA (uracil-5-)-methyltransferase related protein	8594	26148	10513	19671	90832	61161	6	84660156769	274902904471	45	4588	6500	8592	106539	1	414135764890	200287690764	46	0.48946	1
	1505184	1506251		+	-	CCNA_01388	methyltransferase	17303	21099	25225	39606	73293	146750	10	235967278200	637833104371	81	1942	0	3636	0	0	152848543	270754934	1	2.97041e-146	1.86679e-144
	1506300	1507313		+	-	CCNA_01389	acetyltransferase	8000	0	0	18312	0	0	1	4550093965	3865306989	6	0	50	0	819	0	4272146	8614684	0	4.29644e-17	1
	1507389	1509002		+	-	CCNA_01390	RNA polymerase sigma factor	5846	13347	11551	13381	46364	67199	3	43704982417	130534672415	26	17238	7600	32282	124569	3	359005641814	396423523217	48	0.61536	1
	1509067	1510149		+	-	CCNA_01391	radical SAM superfamily protein	11748	29698	10648	26891	103164	61946	8	99163297380	343279640119	59	9849	0	18444	0	1	7530369344	8071187792	8	0.0179809	0.187856
	1510305	1510772		+	-	CCNA_01392	glycosyltransferase involved in cell wall biogenesis	1200	4300	23450	2746	14937	136424	11	484071816744	217612952135	109	0	0	0	0	0	0	244	0	1	1
	1512413	1510803		-	-	CCNA_01393	soluble lytic murein transglycosylase	34977	9431	4019	80062	32761	23381	5	57312836062	159731093418	28	22661	4150	42437	68021	3	16515368812	185322711756	34	0.544684	1
	1513286	1512465		-	-	CCNA_01394	uracil DNA glycosylase superfamily protein	33534	7950	18172	76759	27616	105718	13	107495916638	413635622445	85	150	5248	280	86018	1	300870800652	120627552247	52	0.582943	1
	1513437	1515113		+	fzeA	CCNA_01395	electron transfer flavoprotein-ubiquinone oxidoreductase FzeA	36304	8351	44603	83100	29009	259485	9	1565234385935	1461845448277	73	23049	0	43164	0	2	57950347756	34344857747	12	0.0338009	0.321857
	1515188	1516918		+	-	CCNA_01396	tetratricopeptide repeat family protein	15400	12498	8501	35250	43415	49456	3	1767377559	133994433942	24	7152	1701	13393	27880	1	4218055715	32330447942	11	0.632301	1
	1516960	1517832		+	-	CCNA_01397	4-diphosphocytidyl-2-C-methyl-D-erythritol kinase	2650	7254	2150	6065	25198	12507	2	3732643769	15884896873	16	0	0	0	0	0	0	244	0	1	1
	1517840	1518478		+	-	CCNA_01398	peptidyl-prolyl cis-trans isomerase	1201	0	0	2749	0	0	0	48025710	53179467	1	0	7549	0	123733	2	725653523010	229303084174	96	0	0
	1520088	1518556		-	-	CCNA_01399	ammonium transporter/methylammonium transporter	19551	0	0	44752	0	0	2	38851194123	16433261098	9	1585	2496	2968	40911	0	42528493960	35125200927	14	0.574284	1
	1520453	1520115		-	glnK	CCNA_01400	nitrogen regulatory protein GlnK	0	0	0	0	0	0	0	0	356	0	1872	8615	3505	141206	6	938022015014	323164838664	213	1	1
	1520934	1521833		+	glyQ	CCNA_01403	glycyl-tRNA synthetase alpha chain	49734	122388	36558	113841	425150	212682	42	3046717040920	8927295704240	278	456122	255655	854193	4190378	160	1970444949935770	1291638359298090	2802	0.00221664	0.028034
	1521840	1523918		+	glyS	CCNA_01404	glycyl-tRNA synthetase beta chain	15799	2824	2775	36164	9809	16144	1	8559563679	28566857761	9	40847	0	76495	0	3	228814384367	96285757118	18	0.609585	1
1524041			1523671	-	-	CCNA_R0138	small non-coding RNA	10294	0	0	23563	0	0	5	8333124937	5624930898	21	0	0	0	0	0	0	244	0	1	1
1523962			1524041	+	-	CCNA_R0139	small non-coding RNA	0	0	0	0	0	0	0	0	356	0	0	0	0	0	0	0	244	0	1	1
	1524403	1524077		-	-	CCNA_01405	GIY-YIG domain protein	105954	200	7868	242529	694	45773	63	1828883005502	788865137188	294	41438	4050	77602	66382	28	2284266979	319140290303	220	0.546524	1
1524552			1524470	-	-	CCNA_R0140	small non-coding RNA	1830	0	0	4188	0	0	4	131907809	149367141	16	0	0	0	0	0	0	244	0	1	1
	1525478	1524621		-	-	CCNA_01406	metal-dependent hydrolase	191491	9850	1094	438324	34216	6364	42	8319448424852	3000113361337	186	160607	2500	300773	40976	38	4304135365066	2169490146549	199	0.47604	1
	1525535	1526167		+	-	CCNA_01407	hypothetical protein	3250	0	0	7439	0	0	0	523708296	618522229	3	0	0	0	0	0	0	244	0	1	1
	1526559	1526164		-	-	CCNA_01408	phosphohydrolase, MutT/nudix family	3446	0	0	7887	0	0	1	602619127	706597818	6	1332	3500	2494	57367	2	103091983620	59543655662	75	2.07014e-05	0.000355317
	1527560	1526556		-	-	CCNA_01409	delta-aminolevulinic acid dehydratase	16186	14650	10750	37049	50891	62539	7	7146625574	206084819241	49	24665	4600	46190	75397	5	22695130660	221989563008	60	0.545807	1
	1529118	1527619		-	-	CCNA_01410	cyclohexanone monooxygenase	111891	11800	9449	256119	40990	54971	16	1560489746211	1261541396876	78	55752	23251	104408	381101	10	5006792792511	4991463205557	161	0.639984	1
	1529711	1529253		-	-	CCNA_03949	conserved hypothetical protein	56700	12452	12255	129786	43255	71295	32	140546850067	565867890410	177	52898	2244	99063	36780	24	139717517641	278443248959	147	0.52493	1
	1529779	1529883		+	-	CCNA_03950	hypothetical protein	3780	7350	1180	8652	25532	6864	21	4274441668	14437855145	130	0	0	0	0	0	0	244	0	1	1
	1529975	1531120		+	-	CCNA_01412	acyl-CoA dehydrogenase, short-chain specific	14456	3050	6850	33089	10595	39851	3	11076443935	49985687139	24	29397	0	55052	0	5	103900933162	51076138764	24	0.496473	1
	1531128	1531727		+	-	CCNA_01413	phosphoglycerate mutase family protein	11292	50	2550	25847	173	14835	4	7308223514	14340507444	22	0	0	0	0	0	0	244	0	1	1
	1531736	1532788		+	-	CCNA_01414	3-hydroxyisobutyryl-CoA hydrolase	4300	0	2149	9842	0	12502	1	1461061501	5117498698	7	0	0	0	0	0	0	244	0	1	1
	1532847	1533644		+	-	CCNA_01415	methyltransferase	46461	27914	42147	106349	96967	245197	26	639513144493	2466479174007	187	65467	4300	122601	70480	17	91115986234	674618598148	120	0.576371	1
	1533716	1534612		+	-	CCNA_01416	3-hydroxyisobutyrate dehydrogenase	3450	0	6001	7897	0	34911	1	16993632397	15358500872	15	0	0	0	0	0	0	244	0	1	1
	1534788	1536014		+	-	CCNA_01417	5-aminolevulinic acid synthase	98257	53695	24299	224911	186525	141363	26	123400228521	4356145345377	150	541423	179640	1013938	2944435	119	530114788430825	719664497112820	1613	0.000464402	0.00658453
	1536558	1536112		-	-	CCNA_01418	ROS/MUCR transcriptional regulator	54252	23170	32055	124183	80487	186485	44	220580745681	1679598805282	291	126792	20215	237447	331339	66	374173151162	7432303306824	636	0.651501	1
	1536723	1538009		+	-	CCNA_01419	serine hydroxymethyltransferase	489706	17000	8447	1120942	59054	49141	72	78511076906067	33339391369046	318	95735	1913	179285	31355	15	1114035480152	824059483037	81	0.937622	1
	1538042	1538515		+	-	CCNA_01420	NrdR family transcriptional regulator	41422	0	2150	94815	0	12507	16	203507380992	84674155398	75	29001	0	54311	0	12	100576084382	49782140148	57	0.552891	1
	1538581	1539045		+	-	CCNA_01421	6,7-dimethyl-8-ribityllumazine synthase	9599	6384	1029	21972	22176	5986	6	3335203005	19721568003	35	15449	50	28931	819	6	20706380539	20045209708	31	0.469928	1
	1539042	1539491		+	nusB	CCNA_01422	N utilization substance protein B NusB	15661	6313	105	35848	21930	610	8	15774816983	25563576295	43	233	50	436	819	0	689357	23880417	1	8.27298e-75	3.92966e-73
	1539451	1540509		+	-	CCNA_01423	thiamine-monophosphate kinase	72217	50690	26249	165305	176086	152708	25	5803805527	3266814194673	155	260042	52947	486988	867841	59	10779080600670	53027931210309	639	0.736802	1
	1540672	1541166		+	-	CCNA_01424	hypothetical protein	14150	0	0	32389	0	0	5	17881691114	9906246051	21	6099	2100	11421	34420	3	12789851262	37321199777	46	0.642626	1
	1541409	1543547		+	-	CCNA_01425	H+ translocating pyrophosphatase	14900	5200	95	34106	18063	552	1	13792618961	21416941174	8	45408	3614	85036	59236	4	16851994143	320729015839	33	0.544179	1
	1544192	1543638		-	-	CCNA_01426	chemotaxis receiver domain protein cheYIII	4994	0	0	11431	0	0	1	1468441432	1569203691	6	8446	0	15817	0	3	5207890956	6226251718	14	0.64578	1
	1544940	1544458		-	bamE	CCNA_01427	beta-barrel assembly machine (BAM) protein BamE	92388	0	550	211477	0	3199	34	1585854767041	433285738405	148	83050	1450	155530	23766	35	843871372444	559755399202	185	0.549504	1
	1545062	1545592		+	-	CCNA_01429	ubiquinol-cytochrome C reductase chaperone	1850	4650	100	4234	16153	581	2	2431865586	4675666137	13	0	0	0	0	0	0	244	0	1	1
	1545577	1546116		+	-	CCNA_01430	conserved hypothetical protein	2550	0	0	5836	0	0	0	292503561	362094549	3	0	0	0	0	0	0	244	0	1	1
	1546292	1547374		+	-	CCNA_01431	fatty acid/phospholipid synthesis protein plsX	23528	50	0	53855	173	0	3	60356708907	22339099870	16	12937	0	24227	0	2	14490492299	14069904146	11	0.586851	1
	1547371	1548348		+	-	CCNA_01432	3-oxoacyl-(acyl-carrier-protein) synthase III	7639	0	2150	17485	0	12507	1	3098697256	8630693582	10	0	0	0	0	0	0	244	0	1	1
	1548563	1548865		+	ihfA	CCNA_01433	integration host factor alpha-subunit	3849	0	0	8810	0	0	2	785953202	913874340	9	0	0	0	0	0	0	244	0	1	1
	1548878	1549303		+	-	CCNA_01434	MerR-family transcriptional regulator	0	0	0	0	0	0	0	0	356	0	0	0	0	0	0	0	244	0	1	1
1549367			1549443	+	-	CCNA_R0035	tRNA-Pro	23870	12001	23253	54638	41688	135278	139	195994600568	507983522362	1002	0	100	0	1639	0	22581546	50905389	10	0	0
	1549760	1549509		-	-	CCNA_01435	conserved hypothetical protein	2449	0	0	5605	0	0	1	265482536	331954871	7	0	0	0	0	0	0	244	0	1	1
	1550008	1549757		-	-	CCNA_01437	transglycosylase associated protein	11561	0	0	26463	0	0	8	11010024329	6909535236	35	0	0	0	0	0	0	244	0	1	1
	1550159	1551190		+	-	CCNA_01438	heme O monooxygenase	5680	13848	0	13001	48105	0	3	35499831542	27694180188	19	0	0	0	0	0	0	244	0	1	1
	1552631	1551231		-	-	CCNA_01439	dTDP-glucose 4,6-dehydratase	26943	39897	37404	61672	138593	217604	13	550305452293	2004213300792	99	30097	100	56363	1639	4	102421423447	56187250266	20	0.0761944	0.624834
	1552866	1553339		+	-	CCNA_01440	LSU ribosomal protein L13P	105923	13169	4550	242458	45746	26470	47	1534280910824	938264158646	221	169784	8799	317959	144222	76	1638723073108	4418334911347	487	0.646641	1
	1553343	1553816		+	-	CCNA_01441	SSU ribosomal protein S9P	4948	0	0	11326	0	0	1	1436277072	1546009505	7	0	0	0	0	0	0	244	0	1	1
	1553908	1554861		+	-	CCNA_01442	N-acetyl-gamma-glutamyl-phosphate reductase	3449	0	0	7894	0	0	0	603903544	709388594	2	0	0	0	0	0	0	244	0	1	1
	1555501	1554869		-	-	CCNA_01443	conserved hypothetical protein	78931	100	69	180673	347	401	22	1101129740245	307095483935	95	162200	1550	303756	25405	52	5079099155677	1991524907327	260	0.675027	1
	1557607	1555589		-	-	CCNA_01444	poly(3-hydroxyalkanoate) polymerase	103534	12296	5550	236990	42713	32288	10	1407112858404	920468102392	51	59797	1900	111983	31142	6	261264275878	314471694172	35	0.561284	1
	1557697	1558137		+	-	CCNA_01445	hypothetical protein	404640	19618	27157	926225	68148	157990	185	41363891316168	28642199916791	871	34676	4250	64938	69660	17	286197847	272542172678	152	0.0184182	0.191446
	1558246	1559466		+	-	CCNA_01446	LL-diaminopimelate aminotransferase	337316	51000	135697	772119	177163	789440	77	20026400146442	73144114182567	474	214039	79402	400837	1301458	48	85048169661815	88518835281313	697	0.592213	1
	1559503	1560792		+	-	CCNA_01447	homoserine dehydrogenase	151290	103346	92113	346304	359002	535883	48	1149529419717	34095617286361	320	129446	2600	242417	42615	20	2291941877731	1490815855783	110	0.664389	1
	1560867	1561820		+	glpX	CCNA_01448	fructose-1,6-bisphosphatase, class II	9336	31098	3449	21370	108027	20065	8	193236610962	202813810410	52	0	2649	0	43419	0	58775396269	34621500953	22	0.643296	1
	1561881	1562858		+	-	CCNA_01449	fructose-1,6-bisphosphatase, FIG superfamily	6950	0	100	15908	0	581	1	3109301206	3241249908	5	16849	0	31553	0	3	27318797792	22041357683	16	0.694824	1
	1562926	1564746		+	recJ	CCNA_01450	single-stranded-DNA-specific exonuclease recJ	113652	229241	63947	260150	796335	372022	40	12127285266224	47153262415332	261	124999	11700	234089	191771	15	55261711005	3647083633450	116	0.638172	1
1564876			1564950	+	-	CCNA_R0036	tRNA-Glu	31084	2750	750	71151	9552	4363	83	92892518412	51617079196	378	18700	0	35020	0	50	35085102156	25726792440	233	0.59881	1
1564996			1565070	+	-	CCNA_R0037	tRNA-Glu	26161	2800	1150	59882	9726	6690	72	55037028250	42551227576	339	36768	41	68856	672	99	173620877252	79221945961	463	0.558107	1
	1565243	1565833		+	cspD	CCNA_01451	cold shock protein cspD	22204	2500	0	50825	8684	0	7	43896203637	26415534906	33	16500	2823	30900	46271	6	4862382297	98005599573	65	0.618019	1
	1565802	1566356		+	-	CCNA_01452	conserved hypothetical protein	14327	11200	15597	32794	38906	90738	13	64124573409	244533816852	97	0	0	0	0	0	0	244	0	1	1
1566421			1566497	+	-	CCNA_R0038	tRNA-Pro	24194	0	782	55380	0	4549	58	58972486577	26744635483	259	7283	0	13639	0	19	3649573197	4225089660	88	0.689016	1
	1566524	1566829		+	-	CCNA_01453	electron transport complex I subunit, NADH-ubiquinone oxidoreductase	30202	0	322	69132	0	1873	18	106847158483	37066288750	77	23963	0	44876	0	15	63620626231	36230406548	73	0.512533	1
1566858			1566934	+	-	CCNA_R0039	tRNA-Arg	429	0	3270	981	0	19023	8	4694508986	4377599844	86	4032	0	7550	0	10	882747891	1066899580	49	0.60249	1
	1567625	1567876		+	-	CCNA_01457	hypothetical protein	118657	5355	2388	271607	18602	13892	91	2539535787864	872021401562	402	91915	1960	172131	32125	75	976148654877	770856529451	405	0.495033	1
	1567879	1568187		+	-	CCNA_01458	hypothetical protein	42591	0	0	97491	0	0	25	251749927781	68113153274	105	14500	0	27154	0	9	19053078553	17196461056	43	0.666702	1
	1568188	1568445		+	-	CCNA_01459	hypothetical protein	21031	4600	1091	48140	15979	6347	18	26083095414	36512645694	91	6439	0	12058	0	5	2715342868	2954579478	23	0.912409	1
	1568518	1568736		+	-	CCNA_01460	hypothetical protein	11857	2112	1255	27140	7336	7301	12	5502795278	14812961167	63	0	0	0	0	0	0	244	0	1	1
	1568764	1569069		+	-	CCNA_01461	hypothetical protein	21194	0	0	48513	0	0	12	47153508324	18697646058	52	3949	0	7395	0	2	839876911	1023432065	12	0.466732	1
	1570469	1569294		-	-	CCNA_01462	lactate 2-monooxygenase	16310	0	0	37333	0	0	2	25146493289	12588308397	10	51082	0	95662	0	8	391325997159	143904049456	40	0.867682	1
	1571776	1570667		-	-	CCNA_01463	3-deoxy-7-phosphoheptulonate synthase	111556	17099	5167	255352	59398	30059	21	1627047815623	1189969995874	103	67822	50	127012	819	12	760761701774	244148284786	57	0.594354	1
	1571955	1571872		-	-	CCNA_03951	hypothetical protein	20735	0	0	47462	0	0	44	44738866718	18047078696	188	7800	0	14607	0	18	4302396958	5333914770	86	0.653249	1
	1572383	1572066		-	-	CCNA_01464	hypothetical protein	2575	0	50	5894	0	290	1	282793646	420854795	6	7500	0	14045	0	4	3915761141	4745642007	22	0.70737	1
	1572606	1574201		+	-	CCNA_01465	methyl-accepting chemotaxis protein	12405	7899	3100	28395	27439	18034	2	1044316590	40048277037	15	11350	1950	21255	31961	1	2041123951	47969640532	16	0.513983	1
	1574589	1574323		-	-	CCNA_01466	hypothetical protein	2599	0	0	5949	0	0	1	306280974	378965570	7	0	0	0	0	0	0	244	0	1	1
	1574712	1576358		+	ccoN	CCNA_01467	cytochrome cbb3 oxidase subunit I ccoN	7282	4952	4500	16668	17202	26179	1	884750960	26840443983	12	0	0	0	0	0	0	244	0	1	1
	1576367	1577110		+	ccoO	CCNA_01468	cytochrome cbb3 oxidase, cytochrome c subunit ccoO	0	0	0	0	0	0	0	0	356	0	0	0	0	0	0	0	244	0	1	1
	1577107	1577274		+	ccoQ	CCNA_01469	cytochrome cbb3 oxidase, subunit ccoQ	0	0	0	0	0	0	0	0	356	0	0	0	0	0	0	0	244	0	1	1
	1577274	1578140		+	ccoP	CCNA_01470	cytochrome cbb3 oxidase, diheme subunit, membrane-bound ccoP	3350	0	2300	7668	0	13380	1	1530107873	4701053105	8	5150	50	9644	819	1	1283746656	2151822019	6	0.554034	1
	1578146	1579636		+	fixG	CCNA_01471	polyferredoxin protein fixG	8899	0	0	20369	0	0	1	5874647283	4489233925	4	0	0	0	0	0	0	244	0	1	1
	1579633	1580133		+	fixH	CCNA_01472	cation pump-linked membrane protein fixH	1250	0	0	2861	0	0	0	52856387	58243207	1	0	0	0	0	0	0	244	0	1	1
	1580130	1582304		+	fixI	CCNA_01473	E1-E2 cation pump ATPase fixI	8000	0	1450	18312	0	8435	0	3229758063	7040047702	4	0	0	0	0	0	0	244	0	1	1
	1582301	1582468		+	ccoS	CCNA_01474	cytochrome cbb3 oxidase maturation protein ccoS	0	0	0	0	0	0	0	0	356	0	0	0	0	0	0	0	244	0	1	1
	1582599	1583243		+	ompW	CCNA_01475	OmpW family outer membrane cation channel	6101	0	0	13965	0	0	1	2374393804	2358538215	7	0	0	0	0	0	0	244	0	1	1
	1583425	1584192		+	ftrB	CCNA_01476	CRP-family transcription regulator FtrB	0	0	0	0	0	0	0	0	356	0	0	0	0	0	0	0	244	0	1	1
	1584237	1585601		+	hemN	CCNA_01477	oxygen-independent coproporphyrinogen-III oxidase hemN	4050	0	1900	9270	0	11053	0	1137759652	4475352594	4	8150	2550	15262	41796	1	18025633834	54522058841	20	0.830376	1
	1586344	1585598		-	-	CCNA_01478	CRP-family transcription regulator	4034	0	0	9233	0	0	0	879583982	1021304582	4	6550	0	12266	0	1	2829118313	3067807712	8	0.641306	1
	1586381	1588444		+	-	CCNA_01479	tetratricopeptide repeat family protein	14802	0	4730	33881	0	27517	1	16333712125	27942977527	9	0	0	0	0	0	0	244	0	1	1
	1588441	1588848		+	-	CCNA_01480	hypothetical protein	6264	0	2750	14338	0	15998	4	2926463250	8807504011	24	0	0	0	0	0	0	244	0	1	1
	1588858	1590603		+	-	CCNA_01481	cyclase homology domain protein	4628	0	7799	10593	0	45372	1	31694330277	23754383398	10	6750	0	12640	0	0	3040583837	3356805663	3	0.685058	1
	1590869	1591087		+	-	CCNA_01483	hypothetical protein	112709	0	1030	257992	0	5992	94	2531339281788	658611298093	401	38390	0	71894	0	35	197163427247	84757388355	164	0.642712	1
	1591111	1591530		+	-	CCNA_01484	DNA Ligase IV adenylation domain protein	87183	0	2157	199562	0	12548	38	1306143558117	422215228552	168	24449	50	45786	819	11	63930691186	38222579182	55	0.669894	1
	1592672	1591536		-	-	CCNA_01485	aldose 1-epimerase	4998	21776	5751	11440	75645	33457	5	68008498194	112944601057	35	0	0	0	0	0	0	244	0	1	1
	1593723	1592713		-	-	CCNA_01486	fumarylacetoacetate (FAA) hydrolase family protein	7440	0	150	17030	0	872	1	3600935318	3742427360	5	6049	0	11328	0	1	2337393231	2553516184	5	0.504884	1
	1593897	1594643		+	-	CCNA_01487	GntR-family transcriptional regulator	9390	11700	30498	21493	40643	177427	12	677813276241	544144193301	106	6550	0	12266	0	1	2829118313	3067807712	8	1.63458e-08	3.51436e-07
	1594813	1596615		+	ilvD	CCNA_01488	dihydroxyacid dehydratase	8450	0	1950	19342	0	11344	1	3717956030	8992329307	5	13550	3502	25375	57400	1	28309874096	112032485154	22	0.934814	1
	1596728	1598278		+	abfA	CCNA_01489	alpha-L-arabinofuranosidase	7447	0	250	17046	0	1454	0	3475463283	3921092770	3	6950	2650	13015	43435	1	25023387919	53449171705	18	0.986428	1
	1598349	1599989		+	-	CCNA_01490	FAD-dependent dehydrogenase	17100	6100	0	39142	21190	0	2	20001321761	27064047708	12	12699	100	23781	1639	1	11675740571	15338737424	7	0.598449	1
	1601159	1599999		-	-	CCNA_01491	cystathionine beta-lyase	9849	12700	100	22544	44117	581	3	25750069722	33314616922	19	14748	50	27619	819	2	18462372574	18594391997	12	0.596696	1
	1602041	1601184		-	-	CCNA_01492	3-mercaptopyruvate sulfurtransferase	7179	7700	3200	16432	26748	18616	3	921987937	28280984263	24	15500	0	29027	0	3	22360894513	19244016182	16	0.577152	1
	1603113	1602115		-	-	CCNA_01493	cysteine synthase	9069	0	1606	20759	0	9343	1	4370719087	8685867525	10	18545	0	34729	0	3	34389469269	25425790898	17	0.607522	1
	1604531	1603290		-	-	CCNA_01494	cyclopropane-fatty-acyl-phospholipid synthase	33099	100	5850	75763	347	34033	5	96696999266	90009172125	29	23422	1950	43863	31961	4	2631793896	94550460695	30	0.506348	1
	1606026	1604575		-	-	CCNA_01495	deoxyribodipyrimidine photolyase	28504	6249	4400	65245	21707	25597	4	32848142209	94857486240	25	18698	0	35016	0	2	35075485079	25722683168	12	0.643893	1
	1606088	1606951		+	-	CCNA_01496	2-dehydro-3-deoxyphosphooctonate aldolase	77716	53342	35858	177892	185298	208610	35	12356168487	4727563835113	220	147023	4703	275334	77085	35	2249419305058	2335248915032	203	0.505131	1
	1606954	1607955		+	-	CCNA_01497	ADP-L-glycero-D-manno-heptose-6-epimerase	11666	15632	6150	26703	54302	35778	6	9029147105	104034286456	38	0	0	0	0	0	0	244	0	1	1
1607996			1607671	-	-	CCNA_R0141	small non-coding RNA	1900	0	0	4349	0	0	1	144407293	168105220	4	0	0	0	0	0	0	244	0	1	1
	1608057	1609523		+	-	CCNA_01498	3-hydroxy-3-methylglutaryl CoA synthase	3400	12003	5890	7782	41695	34266	2	15942371641	50203584738	19	6949	0	13013	0	0	3260392157	3650570124	4	0.848136	1
	1609534	1610736		+	-	CCNA_01499	acetyl-CoA acetyltransferase	8250	1026	7600	18884	3564	44214	2	22371867402	32760951479	18	6850	2250	12828	36879	1	14239132721	42340343066	20	0.520445	1
	1610768	1611922		+	-	CCNA_01500	conserved hypothetical protein	487367	322461	184188	1115588	1120161	1071545	156	42589944035	320159815750354	954	130045	3300	243539	54089	23	2017209794843	1616207770448	128	0.00304492	0.0374654
	1612267	1611887		-	-	CCNA_01501	protein kinase C-like superfamily protein	3700	0	0	8469	0	0	1	714910397	837029613	7	0	0	0	0	0	0	244	0	1	1
	1613346	1612264		-	-	CCNA_01503	phosphotransferase family protein	1849	0	0	4232	0	0	0	135258365	154184102	1	7749	0	14511	0	1	4234846067	5235765082	6	0.0742823	1
	1613345	1614289		+	-	CCNA_01502	conserved membrane spanning protein	0	0	1797	0	0	10454	0	1185038591	1332175946	3	16900	0	31649	0	3	27518704667	22147574740	16	0.853632	1
	1616394	1614298		-	recG	CCNA_01504	ATP-dependent DNA helicase recG	75849	24492	20952	173619	85080	121891	10	143073411598	1559800894829	60	86096	14049	161234	230273	9	178891945249	2984194998045	93	0.591737	1
	1616739	1616437		-	-	CCNA_01505	hypothetical protein	122387	15303	5482	280145	53159	31892	85	2151260763001	1394830575746	401	62182	3150	116450	51630	43	153767895045	472960488594	277	0.562717	1
	1617545	1616805		-	-	CCNA_01506	cystine transport ATP-binding protein	14034	0	7	32123	0	40	3	17505099602	9782777144	14	1260	0	2359	0	0	54114189	115799117	1	0.000342903	0.00496723
	1618201	1617542		-	-	CCNA_01507	cystine transport system permease protein	0	0	0	0	0	0	0	0	356	0	0	0	0	0	0	0	244	0	1	1
	1618991	1618206		-	-	CCNA_01508	cystine-binding protein	5900	7802	0	13505	27102	0	3	8255307072	14215103486	17	0	0	0	0	0	0	244	0	1	1
	1620214	1619099		-	-	CCNA_01509	3-oxoacyl-(acyl-carrier-protein) synthase III	5750	50	0	13161	173	0	0	2027417281	2158486339	3	11297	0	21156	0	2	10466573925	10847659483	9	0.668707	1
	1620483	1620866		+	-	CCNA_01510	hypothetical protein	6450	9422	20000	14764	32730	116353	16	230089020492	249169180568	142	0	0	0	0	0	0	244	0	1	1
	1620866	1621768		+	-	CCNA_01511	sterol desaturase family protein	2949	1792	0	6750	6225	0	0	379309419	2027140391	4	2600	0	4869	0	0	308048774	469641605	2	0.605337	1
	1621899	1622564		+	-	CCNA_01512	IS200-like transposase	6649	7950	1850	15219	27616	10762	4	2876143672	22028600508	26	0	300	0	4917	0	315387536	481279068	3	0.00563318	0.064099
	1622843	1623826		+	-	CCNA_01513	C4-dicarboxylate-binding protein	12000	0	0	27468	0	0	2	12040357643	7379555207	9	8900	1650	16667	27044	2	1893809846	34941055949	22	0.661838	1
	1623823	1624323		+	-	CCNA_01514	C4-dicarboxylate transport system, small permease component	1850	0	144	4234	0	837	0	110066681	250793816	3	6348	0	11888	0	2	2624370314	2868850855	11	0.700867	1
	1624314	1625594		+	-	CCNA_01515	C4-dicarboxylate transporter large subunit	3704	0	1200	8478	0	6981	0	593576307	2841376379	4	0	0	0	0	0	0	244	0	1	1
	1626412	1625780		-	-	CCNA_01516	NAD(P)H:FMN oxidoreductase family protein	13100	0	0	29986	0	0	3	14861374615	8627892471	15	21701	0	40640	0	6	50147915276	31666566405	32	0.635227	1
	1627576	1626548		-	-	CCNA_01517	conserved hypothetical protein	36909	32048	24000	84485	111328	139624	16	45409837947	1102440976546	108	14252	50	26690	819	2	16963510201	17580196897	13	0.00334773	0.0407067
	1628183	1627539		-	-	CCNA_03892	HD family metal-dependent phosphohydrolase	21615	6949	4398	49476	24139	25586	9	9281533263	70814908238	51	19299	1699	36141	27847	6	1106108372	67437902624	49	0.506883	1
	1628290	1629102		+	-	CCNA_01519	universal stress protein family	42976	100967	71011	98372	350738	413118	47	3406975052658	12919110213141	353	21593	2598	40437	42583	6	43119659	112632661951	51	0.0038192	0.045578
	1629134	1629508		+	-	CCNA_01520	conserved hypothetical protein	7950	0	4750	18197	0	27633	6	8997693465	17057700232	40	9000	0	16854	0	4	6065284547	6876307329	22	0.622092	1
	1630458	1629643		-	-	CCNA_01521	putative exported protein	576506	14916	5334	1319628	51815	31031	132	121171101754114	45179611543657	572	149701	1850	280349	30322	37	3925839940223	1757800218995	190	0.666844	1
	1631426	1630557		-	-	CCNA_01522	ATP-dependent protease subunit	10568	0	100	24190	0	581	2	8626181545	6154610804	9	29099	800	54494	13112	6	52373494058	74991473284	38	0.87834	1
	1632116	1631535		-	flmH	CCNA_01523	acetyltransferase flmH	1596	0	0	3653	0	0	0	95019728	104810603	2	0	0	0	0	0	0	244	0	1	1
	1634067	1632277		-	flbA	CCNA_01524	FlbA protein	14993	0	0	34319	0	0	1	20546487797	10975165427	6	50	100	93	1639	0	19627581	59296261	0	5.23982e-09	1
	1634266	1634691		+	flbT	CCNA_01525	flagellar biosynthesis repressor flbT	4582	7850	800	10488	27269	4654	5	5851575857	15147283152	33	5880	50	11011	819	2	1813788321	2839977965	13	0.656271	1
	1634651	1635013		+	flaF	CCNA_01526	flagellar biosynthesis regulatory protein flaF	1356	6250	288	3103	21711	1675	3	5201277565	6921214508	24	6860	2350	12846	38518	5	16652034232	44918369169	70	0.687172	1
	1635261	1636082		+	fljL	CCNA_01527	flagellin fljL	24494	0	50	56067	0	290	5	66322894899	24041559034	22	33446	450	62635	7375	8	104845578084	80329783431	42	0.612762	1
	1636359	1637180		+	fljK	CCNA_01528	flagellin fljK	19851	0	1826	45439	0	10623	4	31798946995	23824668520	22	6300	0	11798	0	1	2576939043	2824125140	7	0.68843	1
	1637293	1637661		+	-	CCNA_01529	FlaG superfamily protein	13049	6701	0	29869	23277	0	9	11738886936	21711930945	48	1028	1500	1925	24586	1	12343370815	16506688349	35	0.565321	1
	1637841	1638677		+	fljJ	CCNA_01530	flagellin FljJ	3651	0	50	8357	0	290	0	664690023	876051478	3	747	0	1398	0	0	15416337	29919449	0	0.306537	1
	1638743	1639297		+	-	CCNA_01531	acetyltransferase	19781	5750	17500	45278	19974	101809	14	123960030254	259741506397	100	3003	0	5623	0	1	435198532	620613073	5	2.03366e-21	6.75406e-20
	1639377	1642241		+	flaY	CCNA_01532	regulatory protein flaY	21621	0	11550	49490	0	67194	2	79545074756	103820678820	13	22448	0	42039	0	1	54391333900	33137261419	7	0.615765	1
	1642303	1642992		+	-	CCNA_01533	hypothetical protein	57948	50	14052	132643	173	81749	18	380055403670	432798252810	103	2900	1750	5430	28683	1	13131477262	24782814285	24	0.922836	1
	1643010	1643408		+	-	CCNA_01534	hypothetical protein	17628	14789	13299	40350	51373	77369	20	18595963802	266454291167	141	23773	100	44520	1639	12	57042660990	37691281756	57	0.648586	1
	1643665	1644168		+	-	CCNA_01535	single-strand DNA binding protein	50276	36700	22643	115082	127488	131729	39	2811476439	1490737619974	247	47832	3400	89576	55728	20	32332793963	326504652392	144	0.588145	1
	1644321	1645001		+	-	CCNA_01536	hypothetical protein	223641	370810	426995	511916	1288116	2484117	272	247299344460168	673747490197715	2096	402710	294906	754166	4833732	207	3193283801026160	1490826994567880	4102	0.655306	1
1645113			1645326	+	-	CCNA_R0040	small non-coding RNA	32532	36903	73623	74466	128193	428314	121	4707245335760	5921922003678	982	1374	2250	2573	36879	3	33392751461	30406657063	92	5.98984e-06	0.000109234
	1645890	1645354		-	-	CCNA_01537	acetyltransferase	4350	0	0	9957	0	0	1	1054296856	1192409462	6	1172	0	2194	0	0	45470727	100261023	2	0.681777	1
	1646212	1648902		+	-	CCNA_01538	pyruvate phosphate dikinase	245376	356675	155901	561668	1239014	906981	51	18687024331814	198846454136212	335	533160	250523	998464	4106261	59	1662073972671010	1318663335567130	948	0.719145	1
	1649019	1649504		+	-	CCNA_03952	hypothetical protein	12074	0	0	27637	0	0	4	12218915181	7455471841	18	6204	975	11618	15980	2	236597195	17680389744	28	0.579726	1
	1650156	1649458		-	-	CCNA_01539	pirin family protein	23089	6307	4550	52850	21909	26470	8	13637709017	74063351568	48	49530	1000	92756	16390	14	227889391489	181396652172	78	0.588552	1
	1650282	1651178		+	-	CCNA_01541	LysR-family transcriptional regulator	18351	0	4550	42005	0	26470	4	24271252241	34517027459	25	0	0	0	0	0	0	244	0	1	1
	1653455	1651185		-	-	CCNA_01542	ice nucleation protein	76490	3050	3450	175086	10595	20070	6	826244425634	395663373702	30	38851	3300	72757	54089	3	7751731233	240476177811	27	0.505547	1
	1654885	1653545		-	-	CCNA_01543	chaperone protein dnaK	10637	0	0	24348	0	0	1	9015013838	5966727740	6	3200	0	5992	0	0	506916393	683005241	2	0.66503	1
	1655039	1656220		+	-	CCNA_01545	NAD(FAD)-utilizing dehydrogenase	6414	7150	3500	14681	24837	20361	2	787223874	26704920712	16	850	0	1591	0	0	21026773	44967196	0	8.9326e-40	3.61284e-38
	1658577	1656352		-	-	CCNA_01546	DEAD-box RNA helicase-like protein	281846	4783	200	645148	16615	1163	23	22719900568181	6598031912877	99	182979	1933	342670	31683	16	6627433350072	2692729366410	84	0.523198	1
	1659263	1658850		-	-	CCNA_03953	conserved hypothetical protein	8300	0	1998	18998	0	11623	4	3589557399	8958382423	24	200	0	374	0	0	651112	1094386	0	0	0
	1659435	1661144		+	-	CCNA_01547	methionyl-tRNA synthetase	20724	0	2016	47437	0	11728	2	34899190389	26150239543	11	18171	0	34029	0	2	32749302441	24696397329	9	0.53512	1
	1661146	1662360		+	-	CCNA_01548	transporter, major facilitator superfamily	10292	6101	0	23558	21193	0	2	7434598191	16433261098	12	0	0	0	0	0	0	244	0	1	1
	1664281	1662374		-	-	CCNA_01549	sulfate adenylyltransferase subunit 1/adenylylsulfate kinase	15998	0	3900	36619	0	22688	1	17388594185	26262686172	10	11700	4050	21910	66382	1	62254678073	125498388200	23	0.637375	1
	1665261	1664281		-	-	CCNA_01550	sulfate adenylyltransferase subunit 2	33406	0	3049	76466	0	17738	6	111051022231	63168917704	32	14649	1599	27433	26208	3	11227704	48620890505	27	0.531332	1
	1665480	1665698		+	-	CCNA_01551	hypothetical protein	368494	50	8649	843486	173	50317	312	41671134051322	14326061818130	1360	205374	2200	384609	36059	192	8713652056048	3542467125393	960	0.559375	1
	1665871	1668519		+	tipN	CCNA_01552	polar localization protein TipN	89138	13949	20049	204037	48455	116638	8	550647624979	1435846339580	46	8663	15700	16223	257334	1	3598196389718	1380630222150	51	0.472511	1
	1668534	1669094		+	-	CCNA_01553	undecaprenyl-phosphate beta-N-acetyl-D-fucosaminephosphotransferase	2350	0	0	5379	0	0	0	240512803	299192966	3	0	0	0	0	0	0	244	0	1	1
	1670539	1669091		-	-	CCNA_01554	D-mannonate oxidoreductase	18800	0	3300	43033	0	19198	2	25157359606	28669190331	14	15501	0	29029	0	2	22364592362	19246276190	10	0.57821	1
	1672134	1670626		-	uxaA	CCNA_01555	altronate dehydratase	13479	4650	5300	30853	16153	30833	2	2681066130	44149619506	17	12291	1387	23017	22733	1	336300	37216616052	15	0.526418	1
	1672295	1673368		+	-	CCNA_01556	LacI-family transcriptional regulator	9186	5900	0	21026	20495	0	2	6152914460	14680956403	12	9398	1949	17599	31945	2	4120197068	42114808789	23	0.610773	1
	1673476	1674939		+	-	CCNA_01557	uronate isomerase	12785	0	0	29264	0	0	1	14017008834	8258153341	6	11522	288	21577	4720	1	6067875974	16280824772	8	0.558811	1
	1674964	1675803		+	-	CCNA_01558	4-deoxy-L-threo-5-hexosulose-uronate ketol-isomerase	10700	0	0	24492	0	0	2	9143504777	6030008446	9	0	0	0	0	0	0	244	0	1	1
	1675960	1676727		+	-	CCNA_01559	2-deoxy-D-gluconate 3-dehydrogenase	3070	0	0	7027	0	0	0	456775048	551556630	3	0	2250	0	36879	0	39722258451	27661557412	24	0.00697594	0.0780732
	1676914	1679643		+	-	CCNA_01560	phosphoenolpyruvate carboxylase	4750	16255	1700	10872	56466	9890	1	41703735484	43508323243	9	0	0	0	0	0	0	244	0	1	1
	1679798	1680181		+	-	CCNA_01561	hypothetical protein	22556	1677	650	51630	5825	3781	11	43390024219	27809723773	53	6400	2157	11985	35354	4	13289245202	39123157362	61	0.526847	1
	1680175	1680849		+	-	CCNA_01562	4-hydroxy-2-oxoglutarate aldolase/2-dehydro-3-deoxyphosphogluconate aldolase	3739	12	0	8558	41	0	1	728881993	865536864	4	8834	0	16543	0	2	5800137036	6675563647	12	0.694678	1
	1680856	1681962		+	-	CCNA_01563	2-dehydro-3-deoxygluconokinase	9444	32	50	21617	111	290	1	6626408282	5010261819	6	37376	3600	69995	59006	7	2173019510	248545476934	58	0.00118785	0.0157035
1682820			1682976	+	-	CCNA_R0142	small non-coding RNA	0	0	0	0	0	0	0	0	356	0	0	0	0	0	0	0	244	0	1	1
	1683307	1682996		-	-	CCNA_01566	conserved hypothetical protein	2345	0	1354	5367	0	7877	2	447878459	2116436769	14	0	0	0	0	0	0	244	0	1	1
	1683567	1684652		+	-	CCNA_01567	proline iminopeptidase	4804	5399	2400	10996	18754	13962	2	419240768	15852685669	13	0	1000	0	16390	0	5672225576	6579699067	7	0.618908	1
	1684807	1686171		+	-	CCNA_01568	Kef-type K+ transport system	350	0	0	801	0	0	0	2489846	3765462	0	0	2400	0	39337	0	46375325557	30283186750	14	0	0
	1686283	1687005		+	-	CCNA_01569	Helix-turn-helix DNA-binding protein	7650	0	14127	17510	0	82186	5	134069267309	71613079030	45	0	0	0	0	0	0	244	0	1	1
	1687082	1688644		+	-	CCNA_01570	penicillin-binding protein	7701	0	2499	17627	0	14538	1	3442919246	9782777144	6	10499	2250	19661	36879	1	6384435349	53609207848	18	0.672619	1
	1689097	1688684		-	-	CCNA_01571	arsenate reductase	27147	47677	30825	62139	165619	179329	46	343531612521	1867834474576	327	272163	57473	509687	942025	161	14613027016789	62154373154549	1753	0.326577	1
	1689768	1689094		-	-	CCNA_01572	major intrinsic protein (MIP)-family channel protein	18584	0	9558	42538	0	55605	7	51576086409	69107694599	48	74248	7002	139046	114768	24	14563809253	1191901015428	188	0.62523	1
	1690118	1689765		-	-	CCNA_01573	ArsR-family transcriptional regulator	43644	0	2600	99901	0	15125	23	226337309287	100096720985	108	7350	1512	13764	24782	5	2186807972	29435787046	54	0.629567	1
	1690173	1690907		+	-	CCNA_01574	arsenic resistance protein arsH	18619	5999	0	42619	20839	0	6	24471495129	29784647879	28	33549	2500	62828	40976	9	11312090361	166344003334	70	0.648578	1
	1692194	1690968		-	-	CCNA_01575	glucose / sorbosone dehydrogenase	385550	161445	151598	882527	560826	881947	103	4409623735713	141381575820193	631	533003	138782	998170	2274741	111	196459006513294	500371035006895	1333	0.665462	1
	1693604	1692309		-	-	CCNA_01576	major facilitator superfamily transporter	9649	0	0	22086	0	0	1	7134038637	5032750368	5	11752	0	22008	0	1	11506874882	11741255511	8	0.58095	1
	1694450	1693632		-	-	CCNA_01577	2-keto-4-pentenoate hydratase family protein	5950	16148	20099	13619	56094	116929	9	207456773284	324688473583	75	0	0	0	0	0	0	244	0	1	1
	1694679	1695041		+	-	CCNA_01578	beta-lactamase repressor	48949	14050	3949	112044	48806	22973	33	153696670490	315087287019	168	140271	22451	262689	367988	90	492699586280	9533987286844	868	0.0923341	0.730978
	1695303	1696811		+	-	CCNA_01579	cell wall degradation protein	20651	0	5450	47270	0	31706	3	32840309909	45315582985	17	11000	2000	20600	32781	1	2782294340	48218743935	17	0.501304	1
	1696883	1697533		+	-	CCNA_01580	M15 superfamily membrane peptidase	88874	11981	20309	203433	41619	118151	33	602107929001	1374112901938	185	17600	2450	32960	40157	6	786914633	87683879863	56	0.782561	1
	1697642	1697974		+	-	CCNA_01581	hypothetical protein	5614	0	0	12850	0	0	3	1944562908	1989720419	12	0	0	0	0	0	0	244	0	1	1
	1698089	1698451		+	-	CCNA_01582	Glutathione-dependent formaldehyde-activating enzyme	2950	0	0	6752	0	0	1	415042296	509468246	6	6146	0	11509	0	3	2428030988	2664856527	15	0.676783	1
	1699561	1698521		-	-	CCNA_01583	phosphate-binding protein	377736	23106	55062	864641	80265	320332	79	28176548078253	35639855268824	405	328618	24467	615412	401032	68	2713977513452	27355337491506	488	0.449805	1
	1699323	1699610		+	-	CCNA_03954	hypothetical protein	646	0	250	1478	0	1454	0	10623815	61444492	3	0	0	0	0	0	0	244	0	1	1
	1702070	1699686		-	-	CCNA_01584	multimodular transpeptidase-transglycosylase PBP 1A	28555	50	21302	65362	173	123928	3	316355889623	334370883755	26	63500	8000	118918	131126	6	2797118429	1155935286481	52	0.630718	1
1702213			1702292	+	-	CCNA_R0143	small non-coding RNA	1920	0	376	4394	0	2187	5	104808331	480324893	27	2444	0	4576	0	6	265418043	412818014	28	0.485872	1
	1704437	1702356		-	-	CCNA_01585	TonB-dependent receptor	213508	81823	82099	488722	284235	477625	32	1398281069530	34693216530913	200	453388	30597	849072	501507	47	8654669586390	52684615301460	324	0.613121	1
	1704585	1705310		+	-	CCNA_01586	ABC transporter, ATP-binding protein	135313	59956	79604	309732	208274	463110	68	1818508743946	18783393330336	450	183095	6643	342887	108883	53	3348882268957	4189047675616	311	0.564217	1
	1705307	1706755		+	-	CCNA_01587	conserved hypothetical protein	132153	52251	53784	302499	181509	312897	29	470493090769	10442085003831	183	110295	4050	206552	66382	16	978895160028	1374682920976	94	0.615025	1
	1706752	1708107		+	-	CCNA_01588	conserved hypothetical protein	107474	64887	69293	246009	225403	403124	32	934259388141	13441906549534	214	127788	150	239312	2458	19	3447606903112	1079478354074	89	0.645475	1
	1709248	1708112		-	-	CCNA_01589	acyltransferase 3	4953	0	0	11337	0	0	0	1439627209	1550094355	3	0	2500	0	40976	0	51148741430	32020699184	18	0.396617	1
	1709381	1711732		+	ligA	CCNA_01590	NAD-dependent DNA ligase	14550	7900	10051	33305	27442	58473	2	13215259012	109720963696	16	22150	3250	41480	53269	2	2572223676	141534053531	20	0.535857	1
	1711708	1712337		+	-	CCNA_01591	DNA polymerase III epsilon-like protein	7250	4200	8100	16595	14589	47123	5	16826923053	44631876836	41	14053	47	26317	770	4	16458103350	17122461665	21	0.63302	1
	1712453	1712881		+	-	CCNA_01592	SN-glycerol-3-phosphate transport ATP-binding protein	264904	19209	63065	606368	66728	366891	146	10883541247875	22114046780600	808	108925	4138	203987	67824	53	913073781937	1363929025439	316	0.650793	1
	1714831	1713020		-	-	CCNA_01593	Xaa-pro aminopeptidase	27546	0	9900	63053	0	57594	3	80133357209	113196310977	22	15201	0	28467	0	1	21339492616	18625959930	7	0.685692	1
1714891			1714984	+	-	CCNA_R0144	small non-coding RNA	5000	0	0	11445	0	0	9	1472761447	1582278534	40	0	0	0	0	0	0	244	0	1	1
	1715901	1715035		-	-	CCNA_01594	ribosomal protein L11 methyltransferase	9750	5850	0	22317	20321	0	3	6605563720	15267718347	16	30650	1850	57399	30322	7	18923667725	124100335859	50	0.679661	1
	1716435	1715941		-	-	CCNA_01595	hypothetical protein	81483	35799	20150	186515	124358	117226	50	98754915093	2145377295822	288	96856	15914	181385	260842	46	250657785311	3985374067032	446	0.594481	1
	1718895	1716478		-	uvrD	CCNA_01596	DNA helicase II	103911	31869	14601	237853	110706	84943	11	618642289135	2225590468693	59	157154	5246	294306	85985	13	2533514120270	2790153107188	78	0.563344	1
	1719228	1718983		-	-	CCNA_01597	RHH DNA-binding protein	3652	0	0	8359	0	0	2	692827100	815867345	11	0	0	0	0	0	0	244	0	1	1
	1719348	1720859		+	-	CCNA_01598	pyridine nucleotide-disulfide oxidoreductase	3485	0	0	7977	0	0	0	619254990	728263225	1	0	2800	0	45894	0	67139513864	37384225670	15	0.00272673	0.0339594
	1721103	1720927		-	-	CCNA_01599	conserved hypothetical protein	11312	9615	196	25893	33400	1140	21	13987652840	27144426928	113	36523	1200	68397	19668	43	77527182858	124943377328	248	0.63386	1
	1722017	1721109		-	-	CCNA_01600	Methane oxygenase, PmoA family	122306	21051	13749	279959	73126	79987	31	1472156953894	2219165024312	158	41799	6600	78278	108178	10	24009043428	618403375923	102	0.576545	1
	1722154	1722390		+	-	CCNA_01601	conserved hypothetical protein	248392	79021	118578	568571	274502	689848	341	6179346090999	55729583574865	2156	303800	80301	568935	1316194	328	54336889752665	112834559912645	3977	0.6398	1
	1722517	1723155		+	-	CCNA_01602	glutathione S-transferase	34580	33244	10326	79153	115482	60073	22	47718798956	614378062491	132	20992	2150	39312	35240	7	200586939	91272157860	58	0.634167	1
	1724496	1723294		-	-	CCNA_01603	aspartate aminotransferase	40038	0	2381	91647	0	13851	6	184070050399	81365490113	29	63102	1650	118172	27044	10	348279905899	326007286301	60	0.625731	1
	1724760	1725353		+	-	CCNA_01604	hypothetical protein	0	0	0	0	0	0	0	0	356	0	0	0	0	0	0	0	244	0	1	1
	1725889	1725350		-	-	CCNA_01605	NADPH-dependent FMN reductase family protein	9850	7612	4788	22546	26442	27855	7	179570950	43109709963	47	6000	50	11236	819	2	1911377212	2952542281	11	0.755525	1
	1726562	1725900		-	-	CCNA_01606	Soj/ParA-related ATPase protein	8430	28029	502	19296	97366	2920	10	193764310142	110596815424	60	11550	0	21630	0	3	11038235408	11345318423	16	0.715071	1
	1726781	1727500		+	-	CCNA_01607	SNARE associated protein family	8298	0	2700	18994	0	15707	2	4127109664	11184229194	16	6800	0	12734	0	1	3095135271	3414099525	8	0.615136	1
	1728137	1727463		-	-	CCNA_01608	TetR-family transcriptional regulator	51587	22449	9849	118083	77983	57298	22	59712780556	608027527358	125	52199	24144	97754	395738	22	5981733698306	5207687151709	365	0.682309	1
	1728187	1730142		+	-	CCNA_01609	alkyl sulfatase	129224	12236	0	295795	42505	0	13	3086051428508	1128409743225	57	42946	1550	80426	25405	4	103760571680	171977844610	27	0.620665	1
	1730240	1730296		+	-	CCNA_03955	hypothetical protein	39203	16	2115	89736	55	12304	131	177231074733	75501070455	597	47	0	88	0	0	20207	19980	0	1	1
	1730384	1731958		+	-	CCNA_01610	2-isopropylmalate synthase	128479	33499	41600	294089	116368	242015	23	805106614247	6369895641185	138	78792	1950	147556	31961	10	616336266968	561557387017	56	0.642634	1
	1732085	1732963		+	-	CCNA_01611	transporter, drug/metabolite exporter family	3665	0	3149	8389	0	18319	1	3233851432	7022434097	10	0	0	0	0	0	0	244	0	1	1
	1733317	1734360		+	mreB	CCNA_01612	rod shape-determining protein MreB	59976	13648	17999	137285	47410	104712	15	151094899608	791077340817	92	41930	0	78523	0	8	243644451678	101466084662	37	0.643795	1
	1734410	1735450		+	mreC	CCNA_01613	rod shape-determining protein MreC	17245	11274	5312	39473	39163	30903	5	704878980	88868055217	35	6300	0	11798	0	1	2576939043	2824125140	5	0.025912	0.254448
	1735447	1735962		+	-	CCNA_01614	conserved hypothetical protein	2700	0	0	6180	0	0	0	335603772	419469663	3	0	0	0	0	0	0	244	0	1	1
	1735967	1737985		+	-	CCNA_01615	cell elongation specific D,D-transpeptidase	21200	0	5649	48527	0	32864	2	35097010277	47769041110	13	27701	0	51876	0	2	90091446713	45763008684	12	0.509883	1
	1737982	1739139		+	rodA	CCNA_01616	rod shape-determining protein RodA	16300	4849	0	37310	16844	0	3	17846094972	22429405371	15	0	0	0	0	0	0	244	0	1	1
	1739139	1739690		+	-	CCNA_01617	acetyltransferase	4300	0	0	9842	0	0	1	1025308530	1168071790	5	0	0	0	0	0	0	244	0	1	1
	1740415	1739738		-	-	CCNA_01618	uracil-DNA glycosylase	1900	0	0	4349	0	0	0	144407293	168105220	2	0	0	0	0	0	0	244	0	1	1
	1741014	1740418		-	-	CCNA_01619	NYN domain protein	5750	0	0	13161	0	0	1	2059433762	2092537541	7	0	0	0	0	0	0	244	0	1	1
	1741064	1741558		+	-	CCNA_01620	2-amino-4-hydroxy-6- hydroxymethyldihydropteridine pyrophosphokinase	900	0	3250	2060	0	18907	1	4346363179	4675666137	14	12	1954	22	32027	0	28267460982	22588004450	32	0.658487	1
	1741687	1742046		+	-	CCNA_01621	DNA-directed RNA polymerase omega chain	252896	12150	5298	578881	42206	30822	136	15485687184187	6357827141442	603	141083	6610	264210	108342	83	1262934176807	2663504409363	517	0.520902	1
	1742148	1744376		+	spoT	CCNA_01622	Rsh ppGpp hydrolase-synthetase	119092	186680	219975	272602	648487	1279742	42	49658590464952	123248293352164	329	79145	6101	148217	100000	7	75586537413	1138797690213	55	0.0281344	0.272343
	1744933	1744514		-	-	CCNA_01623	phosphohydrolase, MutT/nudix family	2849	16	2550	6521	55	14835	2	1938453601	4815598560	16	0	0	0	0	0	0	244	0	1	1
	1745014	1745598		+	-	CCNA_01624	orotate phosphoribosyltransferase	1100	6700	50	2517	23274	290	2	7033192080	6729731714	14	0	0	0	0	0	0	244	0	1	1
	1747389	1745770		-	-	CCNA_01625	aminobenzoyl-glutamate utilization protein B	12251	0	0	28042	0	0	1	12653074280	7652255548	5	14698	0	27525	0	1	19683829395	17598073159	8	0.576481	1
	1747568	1748332		+	-	CCNA_01626	pyridoxal phosphate biosynthetic protein pdxJ	1550	6400	12399	3547	22232	72133	4	83040635622	68768667751	42	0	50	0	819	0	4272146	8614684	0	0	0
	1748329	1748730		+	acpS	CCNA_01627	Holo-(acyl-carrier protein) synthase	0	0	0	0	0	0	0	0	356	0	0	0	0	0	0	0	244	0	1	1
	1748742	1749035		+	-	CCNA_01628	hypothetical protein	533	0	0	1220	0	0	0	6834689	9460745	1	5448	0	10202	0	3	1818062342	2037536742	17	9.55006e-11	2.35012e-09
	1749159	1750004		+	-	CCNA_01629	signal peptidase I	5440	0	0	12452	0	0	1	1803135525	1851853748	4	11465	2300	21470	37698	3	5538600019	58321086670	34	0.0220842	0.223301
	1750026	1750721		+	-	CCNA_01630	ribonuclease III	4248	0	0	9723	0	0	1	995807012	1132275800	4	0	0	0	0	0	0	244	0	1	1
	1751486	1751025		-	-	CCNA_01632	hypothetical protein	3256	0	0	7453	0	0	1	526076831	621980243	5	18200	2864	34083	46943	9	3169146602	107728582464	87	3.20029e-11	8.02035e-10
	1751636	1752586		+	era	CCNA_01633	GTP-binding protein era	10549	0	0	24146	0	0	2	8836554640	5879263856	8	16045	0	30047	0	3	24293309688	20372149164	15	0.622056	1
	1752579	1753430		+	-	CCNA_01634	arylamine N-acetyltransferase	3952	3150	0	9046	10942	0	1	1098272648	4372083580	7	14048	50	26308	819	3	16368569228	17166865676	15	0.639805	1
	1753433	1754164		+	-	CCNA_01635	DNA repair protein recO	5000	0	0	11445	0	0	1	1472761447	1582278534	5	14694	0	27517	0	4	19670101778	17589134704	18	0.719263	1
	1754218	1755804		+	-	CCNA_01636	alkaline phosphatase	79530	50	18379	182045	173	106923	11	805737020502	789625985435	60	69283	6998	129748	114702	9	4619282713	1103828838274	77	0.550708	1
	1755866	1758145		+	-	CCNA_01637	topoisomerase IV subunit A	98157	81095	26552	224682	281707	154470	16	339205494334	6552446204590	96	118823	35770	222523	586297	13	9655171191750	15895499361734	177	0.631597	1
	1758142	1759530		+	-	CCNA_01638	beta-lactamase family protein	157018	336185	73026	359415	1167836	424841	73	36770836008194	91548571189114	468	445105	67746	833561	1110408	74	5013483354366	123289071633694	699	0.595557	1
	1759642	1760952		+	-	CCNA_01639	beta-lactamase family protein	2600	300	0	5951	1042	0	0	254198090	545060483	1	0	2157	0	35354	0	35893560717	26074550112	13	0.0100741	0.109158
	1760990	1761952		+	-	CCNA_01640	quinone oxidoreductase	1650	0	0	3776	0	0	0	102880089	114522108	1	7100	0	13296	0	1	3433162978	3971925724	6	0.0544636	1
	1761961	1762896		+	-	CCNA_01641	2-nitropropane dioxygenase family protein	6000	0	0	13734	0	0	1	2281221193	2277923374	4	0	0	0	0	0	0	244	0	1	1
	1762909	1763676		+	-	CCNA_01642	gluconate 5-dehydrogenase	1350	0	280	3090	0	1628	0	45074365	212974856	2	0	0	0	0	0	0	244	0	1	1
	1764555	1763716		-	-	CCNA_01643	arginine-tRNA-protein transferase	60159	14949	5850	137704	51929	34033	17	242502266544	472811408556	88	66903	3600	125291	59006	17	162241006087	600711131261	109	0.54685	1
	1765552	1764656		-	-	CCNA_01644	chemotaxis motB protein	22503	0	3750	51509	0	21816	5	38912963118	39490032370	27	36442	1450	68246	23766	8	62281558815	134651903248	51	0.612666	1
	1765667	1766527		+	-	CCNA_01645	3-hydroxyisobutyrate dehydrogenase	9807	8649	13050	22448	30044	75920	6	50959484937	134902004383	49	21252	0	39799	0	5	47693279831	30775861451	23	0.639651	1
	1767183	1766524		-	-	CCNA_01646	dethiobiotin synthetase	0	0	0	0	0	0	0	0	356	0	0	1900	0	31142	0	26472539566	21586006392	23	1	1
	1768334	1767180		-	-	CCNA_01647	8-amino-7-oxononanoate synthase	7397	0	2200	16931	0	12798	1	2951134835	8491650536	8	36198	0	67789	0	6	171216711346	75389047131	29	0.700449	1
	1768405	1769667		+	-	CCNA_01648	adenosylmethionine-8-amino-7-oxononanoate	76490	0	11999	175086	0	69806	12	738608426426	568447181273	64	21238	5949	39773	97508	4	116471056172	285282451376	54	0.523894	1
	1769664	1770605		+	-	CCNA_01649	transporter, drug/metabolite exporter family	90	0	0	206	0	0	0	95666	132189	0	0	0	0	0	0	0	244	0	0	1
	1771179	1770655		-	-	CCNA_01650	copper/zinc superoxide dismutase	71478	25995	48821	163613	90301	284024	50	948268806088	4071597173357	341	34247	5032	64135	82478	15	7431780690	333952400796	139	0.634857	1
	1771304	1774063		+	-	CCNA_01651	DNA gyrase subunit A	104765	104042	44260	239808	361420	257490	16	364964126409	12773585202693	103	396083	31701	741756	519603	31	2956168895075	45853005017069	228	0.668083	1
	1774090	1774581		+	-	CCNA_01652	phosphopantetheine adenylyltransferase	1850	17251	17590	4234	59926	102332	13	182259076504	257863568309	112	4250	0	7959	0	1	1001900110	1196595235	8	1.75475e-10	4.2415e-09
	1774739	1775572		+	-	CCNA_01653	cyclophilin-type peptidylprolyl cis-trans isomerase	10315	718	1795	23611	2494	10442	2	4646839634	12181559436	14	4259	2000	7975	32781	1	15335579074	31787799134	24	0.60087	1
	1775569	1776417		+	-	CCNA_01654	cyclophilin-type peptidylprolyl cis-trans isomerase	2400	0	0	5493	0	0	0	252928362	317939976	2	0	0	0	0	0	0	244	0	1	1
	1776509	1776976		+	-	CCNA_01655	cyclophilin-type peptidylprolyl cis-trans isomerase	14363	0	0	32877	0	0	5	18535134007	10182447705	23	6699	0	12545	0	2	2986026145	3240549558	13	0.607439	1
	1778120	1777143		-	-	CCNA_01656	endonuclease/exonuclease/phosphatase family protein	9634	0	1600	22052	0	9308	2	5081637625	9352855369	10	15188	0	28443	0	3	21296339861	18598901323	14	0.560734	1
	1778806	1778162		-	-	CCNA_01657	hypothetical protein	50998	9299	2600	116734	32302	15125	17	231848185207	250216020320	84	14199	1000	26590	16390	4	1817207068	34145530228	33	0.656103	1
	1778893	1779993		+	-	CCNA_01658	S-adenosylmethionine:tRNA ribosyltransferase-isomerase	18648	0	2700	42685	0	15707	3	25244232362	25568276617	17	17500	800	32772	13112	3	8777370639	37372524023	20	0.530235	1
	1779993	1781108		+	-	CCNA_01659	queuine tRNA-ribosyltransferase	1400	50	0	3204	173	0	0	65131696	85327938	1	0	0	0	0	0	0	244	0	1	1
	1781911	1781219		-	-	CCNA_01660	conserved hypothetical protein	5904482	11371128	8603527	13515421	39500913	50052516	6776	2.87211e+17	1.14789e+18	49576	832616	101987	1559264	1671643	273	575981317611	486148555546067	2331	2.85645e-11	7.24758e-10
1782039			1782113	+	-	CCNA_R0041	tRNA-Lys	249143	63	55	570290	218	319	603	17441887242754	4708493864014	2537	79583	88	149037	1442	215	1107990289193	356451140660	1003	0.639469	1
	1782651	1784363		+	-	CCNA_01663	potassium-transporting ATPase A chain	1073746	19549	300	2457815	67909	1745	115	562585969849259	171224712083778	491	269425	2484	504560	40714	32	17300599920012	6711262211651	159	0.686384	1
	1784375	1786435		+	-	CCNA_01664	potassium-transporting ATPase B chain	60247	23799	11848	137906	82672	68927	8	89080899834	791599222682	46	65745	4850	123122	79495	6	59453420424	756952339126	49	0.486846	1
	1786463	1787056		+	-	CCNA_01665	potassium-transporting ATPase C chain	21193	0	4899	48510	0	28500	7	33792252074	43280220078	43	59091	0	110661	0	20	555074175252	185942271534	93	0.631864	1
	1787056	1789734		+	kdpD	CCNA_01666	osmosensitive K+ channel histidine kinase kdpD	41480	46299	31552	94948	160833	183559	8	155296230838	2316180312395	54	13950	100	26124	1639	1	14863608788	17858679622	5	4.46835e-05	0.000733061
	1789742	1790440		+	kdpE	CCNA_01667	two-component response regulator kdpE	2334	0	7319	5342	0	42579	2	29988535629	18328809930	22	0	0	0	0	0	0	244	0	1	1
	1790704	1791576		+	-	CCNA_01668	sulfate transport system permease protein cysT	6568	0	10131	15034	0	58938	3	58421919693	40160678567	28	0	0	0	0	0	0	244	0	1	1
	1791576	1792433		+	-	CCNA_01669	sulfate transport system permease protein cysW	0	0	0	0	0	0	0	0	356	0	0	0	0	0	0	0	244	0	1	1
	1792450	1793469		+	-	CCNA_01670	sulfate transport ATP-binding protein cysA	2800	0	2000	6409	0	11635	0	1089331742	3784524654	5	0	0	0	0	0	0	244	0	1	1
	1793574	1793930		+	dgrA	CCNA_01671	diguanylate receptor protein dgrA	1750	0	1456	4005	0	8470	1	506944382	1858894652	11	0	1198	0	19636	0	8751676611	9277118479	27	0.6668	1
	1795006	1794029		-	-	CCNA_01672	transglutaminase-like enzyme	12433	0	1372	28459	0	7981	2	10002773097	12124618049	12	13551	0	25377	0	2	16196481423	15291841533	12	0.505587	1
	1795965	1795018		-	-	CCNA_01673	alphaE superfamily protein	4389	2224	0	10046	7725	0	1	851727047	3703070603	6	7800	50	14607	819	1	3745993889	5991773106	8	0.556139	1
	1797482	1795962		-	-	CCNA_01674	circularly permuted ATP-grasp type 2 protein	33783	0	6801	77329	0	39566	4	102245496082	104302850474	25	8610	8346	16124	136797	2	683326508015	371461224893	50	0.620843	1
	1797735	1799519		+	-	CCNA_01675	outer membrane protein	8045	0	4148	18415	0	24131	1	6945855357	15219123474	7	13900	2600	26030	42615	1	5835541328	77232040021	19	0.654723	1
	1799591	1803712		+	-	CCNA_01676	conserved hypothetical protein	30802	31799	73751	70506	110463	429059	6	5058715695514	5498098385260	49	22900	2950	42885	48352	1	406782068	132723805765	11	0.115366	0.90455
	1803814	1805058		+	-	CCNA_01677	carboxypeptidase G2 precursor	37479	14048	9999	85789	48799	58170	8	19124065856	345977383504	51	14545	0	27238	0	2	19194841155	17290010507	10	0.645146	1
	1805059	1806063		+	-	CCNA_01678	arginine N-succinyltransferase, beta chain	7000	11550	11949	16023	40122	69515	5	42375999571	126813058552	41	21400	2249	40076	36862	4	113677391	97411179148	38	0.513751	1
	1806060	1807517		+	-	CCNA_01679	succinylglutamic semialdehyde dehydrogenase	8799	0	0	20141	0	0	1	5718063416	4419028005	4	8503	0	15923	0	1	5292047766	6290670604	5	0.535326	1
	1807514	1808854		+	-	CCNA_01680	succinylarginine dihydrolase	5250	5000	0	12017	17368	0	1	3005449303	8319336838	7	0	2100	0	34420	0	33659687806	25100805116	12	0.610587	1
	1808851	1809357		+	-	CCNA_01681	RimI-like acetyltransferase	1900	0	0	4349	0	0	0	144407293	168105220	2	0	0	0	0	0	0	244	0	1	1
	1810292	1809354		-	-	CCNA_01682	LytT-family transcriptional regulator	18986	0	0	43459	0	0	3	36211443995	15714236373	15	5450	0	10206	0	1	1819773593	2039648405	5	0.673388	1
	1810291	1811511		+	-	CCNA_01683	acetyltransferase family protein	5568	5670	0	12745	19696	0	1	3970594598	9935634630	8	0	2100	0	34420	0	33659687806	25100805116	14	0.591894	1
	1812350	1811466		-	-	CCNA_01684	phenylalanine-4-hydroxylase	705276	188472	60942	1614384	654712	354540	195	92011420726327	185587626268924	988	961276	62803	1800209	1029388	234	58539970092627	337500261168215	1598	0.612616	1
	1812844	1812515		-	-	CCNA_01685	hemimethylated DNA-binding protein yccV	4897219	97424	33803	11209785	338430	196654	2765	2.09592e+16	7899721532258070	11863	1768660	12176	3312221	199573	1094	1668307223285700	575572140357590	5320	0.668246	1
	1813006	1814112		+	-	CCNA_01686	exopolyphosphatase GppA	46088	75345	41381	105495	261732	240741	26	673131741742	5456375185646	183	8800	50	16480	819	1	5085466318	7173688711	7	9.42742e-26	3.37816e-24
	1814109	1814819		+	-	CCNA_01687	FtsJ-family 23S rRNA methylase	1400	0	0	3204	0	0	0	69361186	75892076	1	0	0	0	0	0	0	244	0	1	1
	1814816	1815859		+	-	CCNA_01688	potassium channel protein	22837	600	0	52274	2084	0	4	53826977320	22578790775	17	16550	2350	30993	38518	3	875748948	79182529548	33	0.616873	1
	1815952	1817415		+	-	CCNA_01689	inosine-5'-monophosphate dehydrogenase	75454	16051	15898	172714	55757	92489	13	291257342720	982588433170	73	19352	0	36241	0	2	38092933630	26994991199	12	0.0382757	0.357794
	1817419	1817814		+	-	CCNA_01690	MAPEG family membrane protein	0	0	0	0	0	0	0	0	356	0	0	0	0	0	0	0	244	0	1	1
	1817814	1819091		+	-	CCNA_01691	tRNA/rRNA methyltransferase	9049	0	0	20713	0	0	1	6115580758	4596104786	5	0	2050	0	33601	0	31769420423	24246188093	13	0.667175	1
	1819124	1820686		+	-	CCNA_01692	GMP synthase GuaA	1100	0	2950	2517	0	17162	0	3316933373	4277645643	4	5687	0	10650	0	0	2015594032	2236060936	3	0.537172	1
	1821710	1820814		-	-	CCNA_01693	LysR-family transcriptional regulator	22951	0	0	52535	0	0	4	57086243090	21288965518	19	6548	0	12262	0	1	2826904606	3059923726	6	0.678031	1
	1823658	1821724		-	-	CCNA_01694	CocE/NonD family hydrolase	8250	7000	2450	18884	24316	14253	1	767668017	24858269064	9	38245	5550	71622	90968	4	8444673160	434609039319	42	0.37145	1
	1826589	1823677		-	-	CCNA_01695	TonB-dependent outer membrane receptor	349	0	0	798	0	0	0	2467524	3534035	0	6300	0	11798	0	0	2576939043	2824125140	2	7.07974e-42	1
	1828470	1826794		-	-	CCNA_01696	aminobenzoyl-glutamate transport protein	72298	47	4898	165490	163	28494	8	744158660438	350964089723	38	61423	0	115028	0	7	609105568946	199945537340	34	0.513597	1
	1828520	1829644		+	-	CCNA_01697	putative poly-gamma-glutamate capsule biosynthesis protein	4996	0	6150	11435	0	35778	1	16917699471	17896955855	13	6700	0	12547	0	1	2987168794	3250325532	5	0.663695	1
	1829731	1830516		+	-	CCNA_01698	endo-1,3-1,4-beta glucanase-related protein	8342	0	2300	19094	0	13380	2	3792767143	9953278319	13	38799	4500	72660	73758	11	8633951	332874232065	93	0.014761	0.157027
	1831520	1830513		-	-	CCNA_01699	LacI-family transcriptional regulator	9450	0	3150	21631	0	18325	2	5746116809	13890008189	13	7050	2299	13202	37682	1	14856325204	44146209782	25	0.622589	1
	1831698	1832939		+	-	CCNA_01700	nucleoside permease	2304	0	4000	5273	0	23270	0	6417277105	7896436808	7	0	0	0	0	0	0	244	0	1	1
	1832940	1833926		+	-	CCNA_01701	xylose isomerase family protein	40289	889	5889	92221	3088	34260	8	148963864532	138459392532	43	58976	0	110446	0	12	552489444861	185285955445	55	0.552494	1
	1833926	1835056		+	-	CCNA_01702	NAD-dependent oxidoreductase	8276	13338	14759	18943	46333	85863	5	73206246403	208209697763	44	20	1200	37	19668	0	8746329246	9346679788	8	0.382834	1
	1835056	1836111		+	-	CCNA_01703	IolE-related protein	4650	5391	4700	10643	18727	27343	2	2583591230	24310951968	17	7199	0	13481	0	1	3548927022	4071945058	6	0.683738	1
	1836139	1836501		+	-	CCNA_01704	cytochrome c	0	0	0	0	0	0	0	0	356	0	0	0	0	0	0	0	244	0	1	1
	1837566	1836721		-	-	CCNA_01705	conserved hypothetical protein	28419	12914	6369	65051	44860	37052	10	9629135389	194774791498	57	450	1603	842	26274	0	16280856220	17155884539	16	0.708808	1
	1837718	1839457		+	-	CCNA_01706	BetA-family choline dehydrogenase	84466	40179	41057	193343	139573	238856	17	186735938983	4726966575847	109	65391	3709	122459	60793	8	136418689693	592313467754	52	0.622717	1
	1839457	1840005		+	-	CCNA_01707	gluconate 2-dehydrogenase subunit 3-family protein	8465	21560	19927	19376	74894	115928	16	175731565270	414060451900	127	14297	2206	26774	36158	6	1487630942	65323267390	57	0.63191	1
	1840110	1840661		+	-	CCNA_01708	conserved hypothetical protein	10963	3800	4400	25094	13200	25597	6	1701066987	30174406704	38	6072	0	11371	0	2	2358743911	2584030228	10	0.817569	1
	1841074	1840745		-	-	CCNA_01709	hypothetical protein	10023	8050	2000	22942	27964	11635	11	2592695052	28946150899	63	7701	0	14421	0	4	4172082734	5167145148	21	0.693758	1
	1842606	1841077		-	-	CCNA_01710	BetA-family choline dehydrogenase	25264	8450	12898	57829	29353	75036	5	29607658537	243801190038	35	47498	0	88950	0	6	328635360643	127105476537	29	0.530638	1
	1844255	1842780		-	-	CCNA_01711	MecR antirepressor / ankyrin repeat family protein	592392	226989	321143	1355991	788512	1868305	140	57279397514769	569705857443626	906	193785	14946	362906	244976	28	646639636561	8715117449005	205	0.97628	1
	1844628	1844245		-	-	CCNA_01712	CopY/TcrY family transcriptional repressor	150397	25575	3686	344260	88842	21443	84	3588004863568	2569955311882	394	12545	1150	23493	18849	7	274982661	33460248122	55	0.00503664	0.0586173
	1844752	1845330		+	-	CCNA_01713	2'-5' RNA ligase family protein	2014	900	1050	4610	3126	6108	1	41338082	2313201880	7	8400	0	15730	0	2	5139406145	6174221520	13	0.610456	1
	1845427	1845242		-	-	CCNA_03956	hypothetical protein	5694	0	0	13033	0	0	5	2011689920	2049454690	23	0	0	0	0	0	0	244	0	1	1
	1845426	1845773		+	-	CCNA_01714	Spx/MgsR-related protein	1386	0	0	3172	0	0	0	67710196	73719379	3	0	0	0	0	0	0	244	0	1	1
	1845879	1846565		+	-	CCNA_01715	GPH-family phosphatase	1950	0	0	4463	0	0	0	153659379	184155735	2	7049	0	13200	0	2	3373971735	3873403497	9	0.531227	1
	1846602	1846787		+	-	CCNA_01716	hypothetical protein	6905	10550	4050	15805	36648	23561	20	4511019329	42269831572	136	18002	1649	33712	27028	21	658948485	61136597179	163	0.533735	1
	1846800	1847210		+	-	CCNA_01717	hypothetical protein	11476	17270	7239	26268	59992	42114	15	13970505110	134780101033	104	34743	3148	65064	51598	18	3539457236	205429817889	141	0.564032	1
	1847210	1847725		+	-	CCNA_01718	RNA polymerase ECF sigma factor	20392	4651	2083	46677	16156	12118	9	18333320025	41167343913	48	15700	2800	29401	45894	7	5758152845	93168046324	72	0.575328	1
	1847722	1848030		+	-	CCNA_01719	hypothetical protein	23851	20098	22520	54595	69816	131014	39	113914529069	617776722157	275	0	0	0	0	0	0	244	0	1	1
	1848134	1848526		+	-	CCNA_03893	conserved hypothetical protein	45583	21498	19278	104339	74679	112153	39	20436501680	800661967845	246	66342	13946	124240	228585	41	482054286906	2341791970392	448	0.61669	1
	1848549	1849133		+	-	CCNA_01721	RNA polymerase ECF sigma factor	29776	52494	26262	68157	182353	152783	33	284958045895	1821390715024	229	41851	8999	78375	147500	17	179427229637	946298110869	193	0.528043	1
	1849102	1849506		+	-	CCNA_01722	conserved hypothetical protein	4383	5750	3550	10032	19974	20652	6	1142974283	20055360114	41	2530	0	4738	0	1	288530773	438020276	5	0.00637524	0.0719416
	1849599	1850426		+	-	CCNA_01723	3-methyl-2-oxobutanoate hydroxymethyltransferase	19916	5866	4804	45587	20377	27948	6	7384109980	62741632485	37	25084	0	46975	0	6	70997703056	38666888529	28	0.556544	1
	1850579	1851331		+	-	CCNA_01724	conserved hypothetical membrane protein	154323	5600	9251	353246	19453	53819	40	4298316953679	2122977325317	188	254813	2749	477195	45058	69	14596727199970	6036709688822	346	0.624424	1
	1851328	1852758		+	bamB	CCNA_01725	beta-barrel assembly machine (BAM) protein BamB	195272	318584	363139	446979	1106693	2112624	111	164731930612973	438460122882884	854	271997	21250	509376	348303	41	1366528203086	17991901469928	299	0.683106	1
	1852884	1854650		+	-	CCNA_01726	EngA-subfamily GTPase protein	18887	4350	5750	43232	15110	33451	2	9356009886	59786231397	17	900	0	1685	0	0	24132591	54566991	0	1.63775e-84	8.1588e-83
	1856234	1854729		-	-	CCNA_01727	methyl-accepting chemotaxis protein	5350	0	0	12246	0	0	0	1732370208	1800581397	2	0	50	0	819	0	4272146	8614684	0	2.33971e-07	1
	1857175	1856420		-	-	CCNA_01728	short chain dehydrogenase	11750	0	0	26895	0	0	2	11446328641	7109699132	11	0	0	0	0	0	0	244	0	1	1
	1858237	1857224		-	-	CCNA_01729	transporter, sodium/bile acid symporter family	15745	0	0	36040	0	0	2	23106702428	11912503200	11	2800	840	5243	13768	0	1181491340	8647877500	9	0.551352	1
	1859759	1858257		-	-	CCNA_01730	amidophosphoribosyltransferase	47192	6600	1200	108022	22927	6981	6	231166716866	165241925145	30	55807	2450	104511	40157	7	151128132584	322930259075	48	0.591713	1
	1860373	1859756		-	-	CCNA_01731	colicin V production protein CvpA	98181	6666	4132	224737	23156	24038	31	1431720620153	698167816764	146	14831	50	27774	819	4	18719679664	18767996648	23	0.0326337	0.311468
	1861752	1860370		-	-	CCNA_01732	DNA repair protein RadA	195826	15355	16207	448247	53340	94287	29	6429945385045	5211394345692	143	49614	50	92913	819	7	357206384606	138951903772	33	0.278444	1
	1862920	1861826		-	-	CCNA_01733	alanine racemase	13349	12499	7450	30556	43418	43341	5	1935015149	105246288135	35	0	1850	0	30322	0	24830349320	20676615529	13	0.672971	1
	1863646	1862960		-	-	CCNA_01734	MarC family integral membrane protein	7320	25446	9000	16755	88394	52359	11	85092862676	228505840611	76	0	50	0	819	0	4272146	8614684	0	0	0
	1864189	1863704		-	-	CCNA_01735	PaaI thioesterase family protein	0	0	0	0	0	0	0	0	356	0	3497	2500	6548	40976	2	33678466747	39356390541	48	1	1
	1864287	1864886		+	-	CCNA_01736	TetR-family transcriptional regulator	13116	50	2799	30022	173	16283	4	10434086707	17448321248	25	0	1250	0	20488	0	9690874342	10164012052	17	0.588927	1
	1866424	1864901		-	-	CCNA_01737	replicative DNA helicase	24501	0	2800	56083	0	16289	3	50626428049	38502696807	15	22636	2832	42391	46418	3	195307962	126759587769	29	0.609195	1
	1869063	1866634		-	-	CCNA_01738	TonB-dependent outer membrane receptor	209766	17949	44495	480156	62351	258857	20	5867810696039	10601470343433	109	493544	37453	924274	613882	44	6597042037474	71501267659565	316	0.708098	1
	1869852	1869268		-	-	CCNA_01739	LSU ribosomal protein L9P	25904	0	1300	59294	0	7562	8	66252862641	32942792088	38	14607	0	27354	0	5	19391617111	17415639654	23	0.603195	1
	1870144	1869866		-	-	CCNA_01740	SSU ribosomal protein S18P	16098	0	2550	36848	0	14835	12	17517501808	20721130265	61	0	0	0	0	0	0	244	0	1	1
	1870539	1870159		-	-	CCNA_01741	SSU ribosomal protein S6P	22798	7900	0	52184	27442	0	14	39818282873	45975191241	69	5233	1150	9799	18849	3	1363705510	18829027996	37	0.625767	1
	1870808	1871467		+	-	CCNA_01742	hypothetical protein	12246	13802	1300	28031	47945	7562	7	21499948069	49988883186	42	76387	777	143052	12735	23	821800842025	389578989198	118	0.657775	1
	1872251	1871442		-	-	CCNA_01743	sterol desaturase family protein	3099	0	0	7093	0	0	0	467139280	561653362	2	6549	0	12264	0	1	2828011333	3061101314	7	0.678782	1
	1873437	1872325		-	-	CCNA_01744	AraC-family transcriptional regulator	12449	0	4300	28495	0	25015	2	11476182227	21967352597	16	27898	2600	52245	42615	5	1582949624	141821784206	42	0.659036	1
	1874042	1873509		-	-	CCNA_01745	thioredoxin peroxidase	6525	0	0	14935	0	0	2	2789632773	2669454638	9	6750	0	12640	0	2	3040583837	3356805663	11	0.554345	1
	1874210	1875154		+	-	CCNA_01746	malonyl-CoA-(acyl-carrier-protein) transacylase FabD	19299	0	2623	44175	0	15259	4	27688302411	26363605587	20	18888	0	35372	0	4	35937435653	26093031056	18	0.526957	1
	1875173	1875913		+	-	CCNA_01747	3-oxoacyl-(acyl-carrier protein) reductase	2428	0	2997	5557	0	17435	1	3015005502	5388980684	10	20275	0	37969	0	5	42598468687	28815589242	25	0.667874	1
	1875935	1876864		+	-	CCNA_01748	methyltransferase	5764	8488	5100	13193	29485	29670	3	3484528219	38477350079	25	0	50	0	819	0	4272146	8614684	0	0	0
	1877029	1877265		+	-	CCNA_01749	acyl carrier protein	48283	0	4100	110520	0	23852	40	272322535795	153839659953	188	40117	2748	75128	45041	36	24370999021	217193282688	253	0.562785	1
	1877432	1878712		+	-	CCNA_01750	3-oxoacyl-(acyl-carrier-protein) synthase II	18451	49	23669	42234	170	137698	5	431738133498	302719399535	46	32151	1470	60210	24094	5	37778364423	115751460607	32	0.560261	1
	1878709	1879809		+	-	CCNA_01751	aminodeoxychorismate lyase	5514	0	0	12621	0	0	0	1862428181	1897226509	3	49	0	91	0	0	21904	-410	0	1	1
	1879813	1880694		+	-	CCNA_01752	YicC-family protein	4950	0	2201	11330	0	12804	1	1694698857	5874946364	9	0	2650	0	43435	0	58827390959	34638887951	24	0.67941	1
	1880687	1881328		+	gmk	CCNA_01753	guanylate kinase	0	0	0	0	0	0	0	0	356	0	0	0	0	0	0	0	244	0	1	1
	1881672	1881367		-	-	CCNA_01754	transglycosylase associated protein	14466	16702	5021	33112	58019	29210	21	11625635033	112459961892	131	14150	0	26499	0	9	17968621902	16493355494	43	0.694821	1
	1883437	1881785		-	-	CCNA_01755	two component sensor histidine kinase	655999	11848	3999	1501588	41157	23264	73	169290495350926	58633257888816	315	367816	2550	688819	41796	45	38456639470935	13305315372476	220	0.566446	1
	1883654	1883535		-	-	CCNA_01756	hypothetical protein	979858	13318	7015	2242905	46263	40810	1512	445627618029072	142081337954645	6472	340767	3867	638164	63383	582	28944748071581	12221673998964	2923	0.647662	1
	1884548	1883718		-	-	CCNA_01757	dimethyladenosine transferase	1900	0	0	4349	0	0	0	144407293	168105220	1	14992	0	28075	0	3	20641033642	18201508565	16	7.30659e-05	0.00115241
	1885594	1884593		-	pdxA	CCNA_01758	4-hydroxythreonine-4-phosphate dehydrogenase	15610	5450	5891	35731	18932	34271	4	3349997357	56110103380	29	15349	5300	28744	86871	4	118377996984	201915110233	57	0.616165	1
	1886940	1885591		-	-	CCNA_01759	peptidyl-prolyl cis-trans isomerase	143889	22700	5050	329363	78855	29379	23	3127976525233	2288669964719	108	99888	3450	187063	56548	15	824800720671	1096129923711	90	0.528336	1
	1889536	1887107		-	-	CCNA_01760	OstA-like organic solvent tolerance protein	19123	0	5059	43772	0	29431	1	27330439204	39364882353	10	14999	2400	28089	39337	1	2297972058	74596811249	13	0.560705	1
	1890635	1889529		-	-	CCNA_01761	YjgP/YjgQ family membrane permease	3000	0	611	6867	0	3554	0	306184270	1322190739	3	0	0	0	0	0	0	244	0	1	1
	1891771	1890632		-	-	CCNA_01762	YjgP/YjgQ family membrane permease	15117	3250	12650	34602	11289	73593	4	62409655916	110353539279	34	16781	0	31426	0	2	27055643015	21901707141	13	0.670501	1
	1891999	1893480		+	-	CCNA_01763	multifunctional aminopeptidase	35414	12750	2350	81063	44290	13671	6	73728366094	168805241422	31	52541	9019	98395	147828	8	80242551227	1120163539519	83	0.667673	1
	1893601	1894062		+	-	CCNA_01764	DNA polymerase III, chi subunit	5743	0	0	13145	0	0	2	2053430069	2085982885	9	0	0	0	0	0	0	244	0	1	1
	1894059	1894400		+	-	CCNA_01765	peptidase inhibitor, I78 family	3900	0	0	8927	0	0	2	811237075	948108021	8	0	0	0	0	0	0	244	0	1	1
	1895228	1894443		-	-	CCNA_01766	CsgG-related curli protein	40111	76265	197787	91814	264928	1150660	72	64626288173097	53533094351451	639	24185	1300	45291	21307	6	14144118375	72784809279	42	5.24483e-14	1.49826e-12
	1895423	1895821		+	-	CCNA_01767	cytochrome C family protein	18723	7350	50	42857	25532	290	11	24733078325	34725273004	57	37726	3114	70650	51040	20	8723890986	222347010434	152	0.65644	1
	1896232	1895834		-	-	CCNA_01768	hypothetical protein	3650	0	0	8354	0	0	1	691832945	813929909	6	2464	0	4614	0	1	270738626	419170977	5	0.531788	1
	1898175	1896310		-	-	CCNA_01769	ABC transporter ATP-binding protein	25660	11951	700	58736	41515	4072	3	46909242113	79268485890	18	0	1000	0	16390	0	5672225576	6579699067	4	0.846354	1
	1898272	1898691		+	-	CCNA_01770	nucleoside diphosphate kinase	16264	0	0	37228	0	0	7	24977086997	12534619960	29	7721	0	14459	0	3	4198516132	5189740400	17	0.611512	1
	1898930	1898688		-	-	CCNA_01771	hypothetical protein	439	6690	0	1004	23239	0	5	7662591153	5921598449	33	0	0	0	0	0	0	244	0	1	1
	1899035	1899412		+	-	CCNA_01772	conserved hypothetical membrane protein	1999	0	2550	4575	0	14835	2	2058375207	4196407975	17	5299	0	9923	0	2	1701011264	1910922588	13	0.547878	1
	1900026	1899409		-	-	CCNA_01773	SNARE-associated family membrane protein	433920	72006	42295	993247	250133	246058	160	33178227114703	52021654117888	803	283332	18975	530604	311014	99	2874975487067	17216427153438	680	0.524954	1
	1900686	1900105		-	-	CCNA_01774	phosphoribosylglycinamide formyltransferase	3250	0	0	7439	0	0	1	523708296	618522229	4	0	0	0	0	0	0	244	0	1	1
	1901872	1900847		-	-	CCNA_01775	phosphoribosylformylglycinamidine cyclo-ligase	7800	0	0	17854	0	0	1	4281734810	3728109898	5	0	50	0	819	0	4272146	8614684	0	3.35495e-16	1
	1901998	1903167		+	-	CCNA_01776	ribonuclease D	36355	17299	5001	83216	60093	29094	9	43781547875	277326817764	49	173601	3250	325107	53269	30	4798532099132	2758667071081	161	0.692806	1
	1903417	1905099		+	-	CCNA_01777	hybrid sensor histidine kinase/receiver domain protein	11620	0	117	26598	0	680	1	10812957806	7291009783	5	11116	39	20817	639	1	9342680296	11156340870	6	0.532122	1
	1905204	1906496		+	-	CCNA_01778	penicillin-binding protein	8848	0	0	20253	0	0	1	5794673421	4454092098	5	5800	2200	10861	36059	1	15923648304	38600852818	18	0.709847	1
	1906798	1906529		-	-	CCNA_01779	hypothetical protein	462	0	0	1057	0	0	0	4844333	7185319	1	0	0	0	0	0	0	244	0	1	1
	1908453	1906954		-	ppx1	CCNA_01780	exopolyphosphatase	6250	0	2600	14306	0	15125	1	2699751962	8342832042	6	12751	100	23879	1639	1	11800148810	15438722407	8	0.551629	1
	1908939	1908544		-	-	CCNA_01781	hypothetical protein	9612	11615	3163	22001	40348	18401	11	5886975657	47117982562	67	10221	87	19141	1425	5	6836622769	10247769578	25	0.68031	1
	1911152	1908936		-	ppk1	CCNA_01782	polyphosphate kinase 1	243448	213480	159859	557255	741584	930007	50	4456120468394	127213927793818	335	228976	20750	428810	340108	22	326440620262	14610306596566	173	0.624016	1
1911195			1911615	+	-	CCNA_R0145	small non-coding RNA	17841	38751	8300	40838	134612	48286	27	209354567344	473119675714	177	12897	6499	24152	106523	9	273289167399	255318339830	155	0.515622	1
	1912050	1911358		-	hdaA	CCNA_01783	chromosome replication regulator protein HdaA	74351	134715	144001	170190	467971	837750	92	18126816984486	50908003846334	709	133198	106854	249443	1751417	70	290237684660529	134597971696406	1443	0.658597	1
	1912619	1912227		-	-	CCNA_01784	hypothetical protein	51915	0	200	118833	0	1163	24	400155029862	111610121152	101	95036	3136	177976	51401	50	766300399159	974710190872	291	0.665293	1
	1913097	1912486		-	-	CCNA_01785	hypothetical protein	21496	0	50	49204	0	290	6	48438759404	19319017579	26	5950	0	11142	0	1	2246340437	2463565006	9	0.680059	1
	1913996	1914736		+	-	CCNA_01786	EcsC family protein	105372	83198	162334	241197	289012	944406	85	26689327907493	50802319258434	663	87790	5700	164406	93427	25	191194638120	1230481323539	173	0.994975	1
	1915856	1914921		-	-	CCNA_01787	transposase	19045	0	0	43594	0	0	3	36481998548	15787753784	15	13101	3650	24534	59826	3	35742675191	115888714017	45	0.673477	1
1915870			1916013	+	-	CCNA_R0042	antisense sRNA to ISCc2 transposase	66179	2450	3399	151484	8510	19774	90	576507625713	301612124834	416	6150	0	11517	0	8	2432083545	2672305692	39	1.61344e-05	0.000280464
	1916470	1916111		-	-	CCNA_01788	hypothetical protein	10808	6850	50	24739	23795	290	8	8700969382	18893937168	45	7051	0	13204	0	3	3376426053	3908950201	18	0.667625	1
	1917164	1916649		-	-	CCNA_01789	acetyltransferase, GNAT family	6240	2821	3978	14283	9799	23142	4	1572120826	17904500185	30	1015	0	1900	0	0	32193830	72266140	1	2.92334e-14	8.52989e-13
	1917304	1917771		+	-	CCNA_01790	protein translocase subunit secG	45996	11850	9449	105285	41164	54971	26	73756550046	378273489348	143	32133	13450	60176	220455	19	1350417020743	1448319186972	299	0.63912	1
	1917887	1919539		+	-	CCNA_01791	CTP synthase	56304	24007	10550	128880	83395	61376	9	77356982165	707024543405	55	66498	8300	124532	136043	9	2429043758	1256600545188	78	0.573817	1
	1919654	1919836		+	-	CCNA_01792	LSU ribosomal protein L32P	65694	7400	200	150374	25706	1163	72	585503970554	293289556757	322	62327	0	116721	0	69	630843459197	205626306827	318	0.492849	1
	1919960	1920958		+	-	CCNA_01793	aspartate protease	159044	21145	14767	364053	73453	85909	35	3292549138778	3797293942010	174	97427	1850	182454	30322	20	1191498183553	841404059953	106	0.586861	1
	1921741	1920971		-	-	CCNA_01794	enoyl-CoA hydratase/isomerase family	2750	0	0	6294	0	0	0	350653894	440454308	2	0	0	0	0	0	0	244	0	1	1
	1921855	1923135		+	-	CCNA_01795	phosphopyruvate hydratase	27194	6549	1100	62247	22749	6399	4	50045728263	59259263594	23	6871	50	12867	819	1	2709941441	4350319284	5	0.86444	1
	1923489	1923791		+	ftsB	CCNA_01797	FtsB-related septum formation initiator	2388	0	3636	5466	0	21153	3	4982861923	6982470463	29	8641	750	16182	12293	6	179628442	18634980417	46	0.593671	1
	1923957	1924988		+	-	CCNA_01799	pyruvate dehydrogenase E1 component alpha subunit	15399	0	500	35248	0	2908	2	19932224961	13002255173	12	69341	4450	129856	72938	14	112554566691	758392442376	98	0.00193072	0.0247242
	1924985	1926337		+	-	CCNA_01800	pyruvate dehydrogenase E1 component beta subunit	35698	18549	7350	81713	64435	42759	8	19818128286	332457222441	46	32620	0	61088	0	4	133370009257	61789656524	22	0.622226	1
	1926343	1926795		+	-	CCNA_01801	hypothetical protein	3610	0	2500	8263	0	14544	2	1867176985	5309299475	16	0	0	0	0	0	0	244	0	1	1
1926746			1926680	-	-	CCNA_R0146	small non-coding RNA	8318	0	0	19039	0	0	22	4995746746	4083727749	94	0	0	0	0	0	0	244	0	1	1
	1926792	1926908		+	-	CCNA_01802	hypothetical protein	44	0	0	100	0	0	0	16881	17029	0	0	28	0	458	0	1058866	1767477	1	1.84055e-09	1
	1926921	1928207		+	-	CCNA_01803	pyruvate dehydrogenase complex, dihydrolipoamide acetyltransferase component	26441	0	2700	60523	0	15707	4	62065117558	42480489771	19	7550	48	14139	786	1	3468592220	5694521827	5	0.712433	1
	1928226	1928708		+	-	CCNA_01804	glutathione peroxidase	12551	6050	250	28729	21016	1454	7	9019006957	20404076320	35	21149	8450	39606	138501	12	423820938435	550058315127	184	0.0537655	0.467206
	1928791	1930191		+	-	CCNA_01805	dihydrolipoamide dehydrogenase	302060	11801	4450	691418	40994	25888	41	24624429757189	9138471877383	180	137450	2050	257406	33601	20	3009203018492	1549256720355	103	0.594807	1
	1930211	1931668		+	-	CCNA_01806	ferritin-like domain protein	16500	0	0	37768	0	0	2	25855447794	12808653060	8	0	0	0	0	0	0	244	0	1	1
	1933254	1931701		-	-	CCNA_01807	acyl-acyl carrier protein synthetase	50528	20519	10200	115659	71278	59340	9	54172106167	574838850053	52	35499	1200	66480	19668	4	70407881406	120261517941	27	0.60896	1
	1934419	1933343		-	-	CCNA_01808	lysophospholipase L2	1050	0	6100	2403	0	35487	1	20589044364	12870459163	11	0	0	0	0	0	0	244	0	1	1
	1934502	1935479		+	-	CCNA_01809	lipoic acid synthetase	59950	4751	13650	137226	16503	79411	14	297942971623	514911503799	79	58696	5750	109921	94246	13	5096383795	770084601834	104	0.557798	1
	1935483	1935929		+	-	CCNA_01810	coenzyme Q-binding protein	6351	0	50	14537	0	290	2	2553312255	2629723576	11	9551	0	17886	0	4	6995129333	7595422534	20	0.622456	1
	1936417	1935926		-	-	CCNA_01811	competence/damage-inducible protein CinA	90636	373353	76004	207466	1296950	442166	199	66114353996233	90975846081253	1318	308909	83032	578502	1360957	161	60682923216212	122437048477924	1970	0.595494	1
	1937604	1936456		-	-	CCNA_01812	2-C-methyl-D-erythritol 4-phosphate cytidylyltransferase/2-C-methyl-D-erythritol	9743	0	4400	22301	0	25597	2	8812425188	18315480483	13	0	4577	0	75020	0	218367976005	92447037197	32	0.647335	1
	1937704	1938711		+	-	CCNA_01813	tRNA-dihydrouridine synthase	13264	95	6749	30361	330	39263	3	22034173216	36001778943	23	0	0	0	0	0	0	244	0	1	1
	1938708	1939829		+	-	CCNA_01814	nitrogen regulation protein ntrB	29909	70922	81394	68462	246368	473523	29	5471907618279	10142924972346	234	5750	4100	10768	67202	1	110271176054	100051596732	34	0.00543126	0.0621477
	1939826	1941247		+	ntrC	CCNA_01815	nitrogen assimilation regulatory protein NtrC	2950	11949	1901	6752	41508	11059	2	18451591242	26272355551	13	0	49	0	803	0	4074573	4421660	0	0	1
	1941312	1943555		+	ntrY	CCNA_01816	nitrogen regulation protein ntrY	96798	29102	26949	221571	101094	156780	12	296954018456	3009780058311	71	73458	3769	137566	61776	6	223785829172	728733093508	44	0.582577	1
	1943552	1944940		+	ntrX	CCNA_01817	nitrogen assimilation regulatory protein ntrX	17349	142981	70825	39712	496686	412036	30	8431959681677	17042242531337	227	14812	50	27738	819	2	18659732770	18727462414	10	9.00004e-24	3.14232e-22
	1944941	1945804		+	-	CCNA_01818	D-alanine aminotransferase	11083	7500	18870	25369	26053	109779	7	176438796196	240469398263	62	100	1051	187	17226	0	6226297299	7252744562	10	0.0433424	0.394329
	1945962	1946210		+	-	CCNA_01819	RNA-binding protein, Hfq family	71427	50	5393	163497	173	31374	56	710043362061	354185917316	261	39921	384	74761	6294	32	175355391267	107798298971	162	0.582312	1
	1946223	1947563		+	-	CCNA_01820	GTP-binding protein hflX	87300	0	2050	199830	0	11926	12	1315045782385	420703320907	52	58249	50	109084	819	8	526666139830	183652105333	40	0.538517	1
	1948387	1947560		-	-	CCNA_01821	MazG protein	4020	50	150	9201	173	872	0	762519942	1279379783	4	7046	0	13195	0	1	3370905325	3830309439	7	0.635293	1
	1949762	1948350		-	-	CCNA_01822	melibiose carrier protein	9885	0	5268	22626	0	30647	1	12102898385	21802077053	12	12401	1250	23223	20488	1	77172339	34941055949	15	0.538403	1
	1950258	1950040		-	-	CCNA_01823	hypothetical protein	0	6250	7249	0	21711	42172	11	23863749639	30165787069	97	5750	0	10768	0	5	2069608110	2289723045	24	0.975519	1
	1950669	1950334		-	-	CCNA_01824	hypothetical protein	2427	0	0	5555	0	0	1	259834180	325534202	5	0	0	0	0	0	0	244	0	1	1
	1951298	1953250		+	-	CCNA_01826	vitamin B12 receptor	101685	0	16501	232758	0	95997	10	1456801353940	1044198889841	56	119341	35041	223493	574348	16	8852591273688	15526942880279	204	0.700629	1
	1953316	1954770		+	cobQ	CCNA_01827	cobyric acid synthase CobQ	1850	0	5500	4234	0	31997	0	15002290195	12014395840	8	50	2000	93	32781	0	29736924040	23475992446	11	0.56054	1
	1955342	1954767		-	-	CCNA_01828	conserved hypothetical protein	15959	4080	4800	36530	14173	27924	7	5311781685	44963019987	45	7649	0	14324	0	2	4105049088	5094475647	12	0.715608	1
	1955493	1956539		+	-	CCNA_01829	SalR-family ligand-binding transcriptional regulator	8197	0	0	18763	0	0	1	4823696351	4000472966	5	0	0	0	0	0	0	244	0	1	1
	1956674	1959535		+	-	CCNA_01830	TonB-dependent receptor	21346	5375	0	48861	18671	0	1	34721960576	33595377577	7	0	2650	0	43435	0	58827390959	34638887951	7	0.490095	1
	1959650	1961173		+	-	CCNA_01831	tryptophan halogenase superfamily protein	0	0	0	0	0	0	0	0	356	0	7049	0	13200	0	0	3373971735	3873403497	4	1	1
	1961197	1963485		+	-	CCNA_01832	beta-glucosidase	0	0	0	0	0	0	0	0	356	0	0	0	0	0	0	0	244	0	1	1
	1963485	1964894		+	-	CCNA_01833	glucosylceramidase	5251	24	1432	12019	83	8330	0	1221026462	4508689340	4	11717	2212	21942	36256	2	4098174400	56541394213	20	0.882397	1
	1967531	1965009		-	-	CCNA_01834	oxidoreductase	86442	54178	28699	197866	188203	166961	12	11951682186	4360618188787	73	32050	2250	60020	36879	2	12980191500	147157657402	19	0.661369	1
	1968214	1967528		-	-	CCNA_01835	ABC transporter ATP-binding protein	17378	20941	33399	39778	72744	194304	18	609981310717	888044697387	148	24424	0	45739	0	7	66596591534	37202692053	33	0.287538	1
	1968272	1968904		+	-	CCNA_01836	acyl-CoA thioesterase I/lysophospholipase	17598	31354	59544	40282	108917	346407	31	3119083935310	3293511792231	260	0	50	0	819	0	4272146	8614684	0	0	0
	1970081	1969053		-	-	CCNA_01837	transposase, IS30 family	9215	0	0	21093	0	0	1	6388318209	4715182583	6	14081	0	26369	0	2	17757784875	16357003338	12	0.623737	1
	1972324	1970882		-	-	CCNA_01840	MerR-family transcriptional regulator	391319	1450	16252	895733	5036	94548	51	45438995424354	19569437298901	229	172745	199	323504	3261	24	7110745817166	1959211514149	113	0.620047	1
	1972490	1974109		+	-	CCNA_01841	isocitrate lyase	102203	6300	10098	233943	21884	58746	13	1349444414192	937575041273	64	133809	8959	250588	146844	17	475417515810	3091958077430	122	0.623223	1
	1974143	1974370		+	-	CCNA_01842	hypothetical protein	21390	10160	10557	48961	35293	61417	33	7564792313	190688783408	212	23990	18451	44926	302425	37	4213328465953	2254865822473	761	0.708807	1
	1974451	1976028		+	-	CCNA_01843	malate synthase	40676	10299	26749	93107	35776	155616	8	292749757312	764493020106	60	116594	19900	218349	326176	17	521566943956	6688790747898	172	0.680065	1
	1976803	1976177		-	-	CCNA_01844	DNA integration/recombination/inversion protein	138274	74159	14514	316510	257612	84437	65	1568677541089	6501922831107	350	380456	117381	712491	1923963	161	173267105199019	269941304040486	2102	0.47192	1
	1977619	1977086		-	-	CCNA_01845	two-component response regulator protein	2799	0	1700	6406	0	9890	1	760232846	3181955318	10	4650	1948	8708	31929	2	13088148396	31662388902	38	0.723605	1
	1978958	1977612		-	-	CCNA_01846	two-component sensor histidine kinase	16984	50	8098	38876	173	47111	3	36114189534	52843072398	21	11925	6552	22332	107392	2	295192224178	251442188017	48	0.636804	1
	1979692	1978955		-	-	CCNA_01847	cytochrome c oxidase assembly protein Surf1	14725	50	4750	33705	173	27633	4	16029020058	28037430346	27	12250	1600	22940	26225	3	119797829	41551517096	33	0.533398	1
	1980078	1979689		-	qoxD	CCNA_01848	quinol cytochrome oxidase polypeptide IV	13355	1958	10722	30569	6801	62377	12	46653101583	71697476654	85	0	0	0	0	0	0	244	0	1	1
	1980701	1980075		-	qoxC	CCNA_01849	quinol cytochrome oxidase polypeptide III	20392	10468	23241	46677	36363	135208	15	231319222570	448946288833	116	55299	31100	103560	509752	27	12581119365537	8905560768109	489	0.897374	1
	1982701	1980704		-	qoxB	CCNA_01850	quinol cytochrome oxidase polypeptide I	65741	6699	16018	150481	23270	93187	8	338918205092	673136304095	44	30599	5680	57303	93099	3	36979991226	355987136094	37	0.5241	1
	1983781	1982720		-	qoxA	CCNA_01851	quinol cytochrome oxidase polypeptide II	76518	9098	38958	175150	31604	226644	21	1026009567522	2224028150356	136	34199	2550	64045	41796	7	11811612662	172005849475	49	0.645773	1
	1983992	1985332		+	-	CCNA_01852	major facilitator superfamily transporter	30597	68500	81240	70036	237954	472627	24	5419462550514	9877052550296	194	13300	513	24907	8408	2	5763181555	23942595429	12	9.01576e-12	2.31631e-10
	1985425	1985829		+	-	CCNA_01853	hypothetical protein	49517	2249	9949	113344	7812	57880	27	215826113049	299237820735	147	105412	1450	197408	23766	53	1636573353295	908551157530	273	0.619848	1
	1985974	1986639		+	-	CCNA_01854	GntR-family transcriptional regulator	9200	7498	3299	21058	26046	19192	5	330099773	32412028471	33	20049	3500	37546	57367	7	8950872155	141955595681	71	0.63123	1
1986625			1986741	+	-	CCNA_R0147	small non-coding RNA	110	1504	4	251	5224	23	2	210740157	318495233	15	423	0	792	0	0	3941889	4265085	3	0.00541116	0.0620915
	1986769	1987485		+	-	CCNA_01855	iron/manganese superoxide dismutase	850	0	2400	1945	0	13962	0	2035949673	3008862537	7	0	1800	0	29503	0	23251064239	19772190866	20	0.691049	1
	1987428	1989626		+	-	CCNA_01856	ferrichrome-iron receptor	14001	26399	12300	32048	91704	71557	4	57158833806	355168510359	29	17099	6850	32021	112276	2	256742072758	320861877121	32	0.471441	1
	1989653	1990909		+	-	CCNA_01857	AraC-family transcriptional regulator	7050	0	0	16137	0	0	1	3359148566	3104368978	4	0	0	0	0	0	0	244	0	1	1
	1990867	1991769		+	-	CCNA_01858	AraC-family transcriptional regulator	2499	0	0	5720	0	0	0	278743658	346155060	2	0	0	0	0	0	0	244	0	1	1
	1991852	1993885		+	-	CCNA_01859	TonB-dependent receptor	5700	6398	0	13047	22225	0	1	5190227052	11496760932	5	0	50	0	819	0	4272146	8614684	0	7.87578e-73	1
	1993888	1995033		+	-	CCNA_01860	iron-regulated membrane protein	0	0	0	0	0	0	0	0	356	0	0	0	0	0	0	0	244	0	1	1
	1995291	1996484		+	-	CCNA_01861	hypothetical protein	1054	0	0	2412	0	0	0	35088113	38826802	0	0	0	0	0	0	0	244	0	1	1
	1997184	1996891		-	-	CCNA_01862	hypothetical protein	6450	0	0	14764	0	0	3	2713589684	2612238483	16	0	0	0	0	0	0	244	0	1	1
1997162			1997282	+	-	CCNA_R0148	small non-coding RNA	3850	0	0	8812	0	0	5	786381449	924355235	24	0	0	0	0	0	0	244	0	1	1
	1998630	1997194		-	-	CCNA_01863	outer membrane efflux protein	61123	0	400	139911	0	2327	7	587360620630	179371966503	32	12549	0	23500	0	1	13468737061	13300676122	8	0.743376	1
	1998726	1999349		+	-	CCNA_01864	TetR-family transcriptional regulator	71393	6100	0	163419	21190	0	22	753312507769	317734846168	98	42330	2006	79272	32879	14	68904867567	190584264149	89	0.508845	1
	1999438	2000526		+	-	CCNA_01865	periplasmic multidrug efflux lipoprotein precursor	9997	0	0	22883	0	0	1	7767577619	5341624383	7	5500	1600	10300	26225	1	5293643198	27291348723	16	0.663266	1
	2000523	2003621		+	acrB4	CCNA_01866	cation/multidrug efflux pump acrB4	5080	13998	0	11628	48626	0	1	37262877852	26999294783	6	17835	1982	33400	32486	1	5559488	71319629041	10	0.591068	1
2003589			2003693	+	-	CCNA_R0149	small non-coding RNA	1500	0	0	3433	0	0	2	81859969	90193870	10	6615	0	12388	0	12	2897122621	3142304066	58	0.0410631	0.37695
	2005050	2003815		-	-	CCNA_03894	MFS sugar transporter	8654	0	0	19809	0	0	1	5494454978	4317929962	5	12298	0	23030	0	2	12831264465	12822794261	9	0.612376	1
	2005987	2005193		-	-	CCNA_01868	2H phosphodiesterase family protein	484	2466	4640	1107	8566	26994	1	7928963698	12244838160	15	0	2650	0	43435	0	58827390959	34638887951	27	0.611652	1
	2008671	2005990		-	-	CCNA_01869	TonB-dependent receptor	28411	10309	31150	65033	35811	181220	4	532660220460	751449047682	35	21398	1949	40072	31945	1	1053408058	85016710263	13	0.649519	1
	2009934	2008780		-	-	CCNA_01870	NagC-family transcriptional regulator	2000	5400	4948	4578	18758	28785	1	6369048324	21008486829	15	2491	0	4664	0	0	277833433	427418689	2	0.00401042	0.0474857
	2010232	2009954		-	-	CCNA_03895	hypothetical protein	0	0	0	0	0	0	0	0	356	0	0	0	0	0	0	0	244	0	1	1
	2010241	2010474		+	-	CCNA_01873	magnesium and cobalt transport protein corA	0	0	0	0	0	0	0	0	356	0	0	0	0	0	0	0	244	0	1	1
	2012213	2010768		-	-	CCNA_01874	transposase	98172	31327	14438	224716	108823	83995	18	503140372497	1999799255696	96	165062	15050	309116	246680	25	140542662865	7029825235994	192	0.638905	1
	2012838	2013983		+	-	CCNA_01875	acyl-CoA dehydrogenase, short-chain specific	0	0	0	0	0	0	0	0	356	0	0	0	0	0	0	0	244	0	1	1
	2015716	2014046		-	-	CCNA_01876	oxidoreductase	24449	0	0	55964	0	0	2	66440897392	23752096580	11	12897	0	24152	0	1	14383065070	13990378049	7	0.594154	1
	2015915	2016775		+	-	CCNA_01877	acyl-CoA thioesterase II	0	0	0	0	0	0	0	0	356	0	0	0	0	0	0	0	244	0	1	1
	2018377	2016779		-	-	CCNA_01878	long-chain-fatty-acid--CoA ligase	1950	0	0	4463	0	0	0	153659379	184155735	0	6001	1925	11238	31552	1	9494521465	33940202809	13	3.02387e-10	7.14018e-09
	2018600	2019703		+	-	CCNA_01879	NADH:flavin oxidoreductases, old yellow enzyme family	0	0	0	0	0	0	0	0	356	0	0	0	0	0	0	0	244	0	1	1
	2019780	2020523		+	-	CCNA_01880	3-ketoacyl-(acyl-carrier-protein) reductase FabG	0	0	0	0	0	0	0	0	356	0	0	0	0	0	0	0	244	0	1	1
	2020520	2021158		+	-	CCNA_01881	NAD-binding Rossmann superfamily protein	0	0	0	0	0	0	0	0	356	0	0	0	0	0	0	0	244	0	1	1
	2021155	2022036		+	-	CCNA_01882	SMP-30/gluconolaconase/LRE-like protein	0	0	0	0	0	0	0	0	356	0	7600	0	14232	0	1	4042055286	4985849918	8	1	1
	2022050	2023222		+	-	CCNA_01883	acyl-CoA dehydrogenase	1150	0	0	2632	0	0	0	43265382	47903267	0	0	0	0	0	0	0	244	0	1	1
	2023230	2024378		+	-	CCNA_01884	acyl-CoA dehydrogenase, short-chain specific	44995	8003	2099	102994	27800	12211	8	176485958022	181943633064	41	50	0	93	0	0	23077	-5668	0	1	1
	2025252	2024476		-	-	CCNA_01885	short chain dehydrogenase	0	0	0	0	0	0	0	0	356	0	0	0	0	0	0	0	244	0	1	1
	2028326	2025426		-	-	CCNA_01886	TonB-dependent receptor	3201	0	0	7327	0	0	0	504983681	601472487	0	24099	0	45130	0	1	64488281759	36514931789	7	0.000940747	1
	2028496	2029269		+	-	CCNA_01888	IclR family HTH transcriptional regulator	3050	5451	2450	6981	18935	14253	2	1179374013	13996140118	17	0	0	0	0	0	0	244	0	1	1
	2030912	2029278		-	-	CCNA_01889	long-chain-fatty-acid--CoA ligase	4512	5600	0	10328	19453	0	1	3730437377	8519797700	6	0	0	0	0	0	0	244	0	1	1
	2031155	2032660		+	-	CCNA_01890	enoyl-CoA hydratase/isomerase family protein	4650	0	0	10643	0	0	0	1237109815	1376379048	2	1296	0	2427	0	0	57933738	122851759	0	0.678451	1
	2033601	2032774		-	-	CCNA_01891	enoyl-CoA hydratase/carnithine racemase	2262	0	0	5177	0	0	0	219402781	271058952	2	0	0	0	0	0	0	244	0	1	1
	2033679	2035319		+	-	CCNA_01892	short chain dehydrogenase	1450	0	0	3319	0	0	0	75486945	81958728	0	0	0	0	0	0	0	244	0	1	1
	2035334	2035876		+	-	CCNA_01893	SnoaL-like domain protein	0	0	0	0	0	0	0	0	356	0	6948	0	13011	0	2	3259189652	3624619141	11	1	1
	2037557	2035926		-	-	CCNA_01894	FAD-NAD(P)-binding protein	7049	300	0	16135	1042	0	0	3116207424	3504554573	3	0	42	0	688	0	2811747	3444173	0	3.66255e-37	1
	2037657	2039096		+	-	CCNA_01895	transporter, major facilitator superfamily	4049	0	0	9268	0	0	0	887607470	1031600059	2	0	0	0	0	0	0	244	0	1	1
2039150			2039245	+	-	CCNA_R0150	small non-coding RNA	0	0	0	0	0	0	0	0	356	0	0	0	0	0	0	0	244	0	1	1
	2039776	2039570		-	-	CCNA_01896	hypothetical protein	9858	0	1850	22565	0	10762	10	5322827745	10431101529	53	15306	2031	28663	33289	16	272431620	63437532062	149	0.678848	1
	2040853	2040047		-	-	CCNA_01897	metal-dependent hydrolase	6450	0	2650	14764	0	15416	2	2864427655	8727856549	12	5849	2050	10953	33601	1	12326383075	35871577619	27	0.649484	1
	2041638	2040850		-	-	CCNA_01898	Mg-dependent Dnase TatD	6229	0	2550	14258	0	14835	2	2622343289	8169416738	12	7699	0	14418	0	1	4170000010	5153258492	9	0.563583	1
	2042645	2041635		-	-	CCNA_01899	DNA polymerase III, delta' subunit	4550	0	0	10414	0	0	0	1174185371	1320773925	3	0	0	0	0	0	0	244	0	1	1
	2043268	2042642		-	-	CCNA_01900	thymidylate kinase	3100	0	0	7095	0	0	0	467455478	565908029	3	7900	0	14794	0	2	4435774701	5572893022	11	0.700113	1
	2044365	2043376		-	-	CCNA_01901	lipoprotein	11448	0	2700	26204	0	15707	2	7734507279	14882974961	14	8954	15252	16768	249991	4	3322119964729	1315580853432	134	6.41101e-05	0.00103514
2044469			2044558	+	-	CCNA_R0043	tRNA-Ser	841	0	0	1925	0	0	1	20421542	23950984	7	0	0	0	0	0	0	244	0	1	1
	2044927	2045415		+	-	CCNA_01902	nickel-responsive regulator NikR	10678	0	0	24442	0	0	3	9098769620	6009819964	16	14000	350	26218	5736	5	9684064503	22485120695	32	0.630417	1
	2045412	2046251		+	-	CCNA_01903	urea carboxylase-associated protein 2	3751	50	2900	8586	173	16871	1	2581861323	6526807569	10	9950	2750	18633	45074	3	17874376796	66859039284	37	0.70761	1
[truncated: 2,086 more rows]

## Sheet: NC_999999_transcripts_criterium
Transcription Start	Translation Start	Translation Stop	Transcription Stop	Strand	Name	Synonym	Product	Raw Counts POS Replicate 1	Raw Counts POS Replicate 2	Raw Counts POS Replicate 3	Normalized Counts POS Replicate 1	Normalized Counts POS Replicate 2	Normalized Counts POS Replicate 3	RPKM POS	Variance POS	Lowess POS	Expression POS	Raw Counts NEG Replicate 1	Raw Counts NEG Replicate 2	Normalized Counts NEG Replicate 1	Normalized Counts NEG Replicate 2	RPKM NEG	Variance NEG	Lowess NEG	Expression NEG	pValue POS vs NEG	qValue POS vs NEG	Log2Fold
165492			165575	+	-	CCNA_R0100	small non-coding RNA	42999	52020	38545	98425	180706	224242	288	341288220241	3431546184528	1997	8047	50	15069	819	19	4054335458	6269971680	94	1.06991e-19	3.41451e-18	4.40903
	179311	180120		+	-	CCNA_00167	metallophosphatase family protein	209180	398329	361079	478815	1383711	2100639	216	152709206342573	550817543139610	1630	43556	1900	81568	31142	11	84165644222	192371610528	69	3.53913e-40	1.46034e-38	4.56213
472905			472973	+	-	CCNA_R0108	small non-coding RNA	10863	19957	36935	24865	69326	214875	178	985319902559	901801276588	1493	5696	0	10667	0	16	2023324395	2243302003	77	3.43787e-20	1.1058e-18	4.27721
	761965	762324		+	-	CCNA_03888	conserved hypothetical protein	1207508	15546	1240	2763998	54003	7213	617	751022342948256	218296226182128	2615	123271	340	230853	5572	69	3057052955598	1032942219529	328	0.00124538	0.0164108	2.99504
844332			844401	+	-	CCNA_R0016	small non-coding RNA	90963	72945	108106	208215	253395	628925	705	7455858795334	25047642938740	5193	246	98	460	1606	0	9567689	86901558	14	0	0	8.535
	976013	976177		+	-	CCNA_00897	hypothetical protein	271886	3450	50	622349	11984	290	302	21035246378792	5996254855048	1282	23226	150	43496	2458	28	51334679431	37454585242	139	7.21088e-05	0.00114616	3.20524
	993209	993033		-	-	CCNA_00913	hypothetical protein	186220	124516	180828	426259	432542	1051998	503	21557182207768	87405865957654	3598	284	361	531	5917	0	392467087	754284410	18	0	0	7.64305
	1006253	1006870		+	-	CCNA_00930	riboflavin synthase alpha chain	732893	1212053	2340607	1677599	4210417	13616888	1258	2.07439e+16	2.7133e+16	10520	190132	38358	356065	628716	75	4833047160067	25339725867999	796	4.31496e-07	8.54035e-06	3.72422
	1112111	1111617		-	-	CCNA_01024	hypothetical protein	79365	95161	222283	181667	330569	1293170	145	74708859276681	78204445498693	1215	33807	3452	63311	56580	15	670123786	216291742215	121	1.56938e-06	3.02401e-05	3.32788
	1257902	1258591		+	-	CCNA_01154	conserved hypothetical protein	660248	154102	387733	1511314	535318	2255704	316	176266229138293	680992211491582	2078	93556	5250	175205	86051	29	330447145462	1263175426592	189	1.54876e-06	2.99843e-05	3.45874
	1430061	1430900		+	-	CCNA_01303	conserved hypothetical protein	1595896	2649758	9250462	3653022	9204703	53816173	2915	7.15123e+17	6.21211e+17	26457	203743	23026	381555	377413	54	208962440	14289196772510	451	1.00908e-195	7.23176e-194	5.87438
	1431129	1431329		+	-	CCNA_01304	hypothetical protein	1696948	32210	24635	3884331	111890	143318	1583	1610738264076180	617591312256254	6864	195925	131	366914	2147	197	9718546221165	2606891662661	918	0.00342042	0.0414612	2.90248
1549367			1549443	+	-	CCNA_R0035	tRNA-Pro	23870	12001	23253	54638	41688	135278	139	195994600568	507983522362	1002	0	100	0	1639	0	22581546	50905389	10	0	0	6.64674
	1781911	1781219		-	-	CCNA_01660	conserved hypothetical protein	5904482	11371128	8603527	13515421	39500913	50052516	6776	2.87211e+17	1.14789e+18	49576	832616	101987	1559264	1671643	273	575981317611	486148555546067	2331	2.85645e-11	7.24758e-10	4.41062
2059942			2059848	-	-	CCNA_R0044	complex medium expressed sRNA	685288	11549	3308	1568631	40118	19244	1337	189175644956379	64061555413094	5712	19269	150	36085	2458	41	31828450979	29431505686	202	2.97816e-46	1.26727e-44	4.82157
	2143687	2142908		-	-	CCNA_01996	undecaprenyl pyrophosphate synthetase	119674	393071	406302	273935	1365446	2363732	213	279333768404345	566027611275305	1710	2269	32	4249	524	0	161982130	442559257	3	0	0	9.15482
	2238341	2237967		-	-	CCNA_02089	hypothetical protein	42873	104210	135059	98136	362003	785729	136	19789265697585	34392493158155	1107	100	150	187	2458	0	49395254	153813194	3	0	0	8.52748
	2364383	2364081		-	-	CCNA_02217	hypothetical protein	3141535	102747	71404	7191006	356921	415405	1985	6702654415121130	2945828615205670	8760	139791	3896	261790	63858	96	2240796597720	1944232753549	537	6.41281e-15	1.88463e-13	4.02794
	2921763	2922152		+	-	CCNA_02758	hypothetical protein	581849	13119	29622	1331858	45572	172331	290	109997034301453	57202952354031	1324	61174	1290	114562	21144	32	369655661123	277804349363	173	0.000678822	0.0092433	2.93606
	2923462	2923683		+	-	CCNA_03976	hypothetical protein	19595	70017	81813	44853	243224	475961	140	6333406169958	9324585458279	1147	85	2596	159	42550	2	55490775400	33851953205	96	1.05888e-07	2.16275e-06	3.57869
	2923673	2923918		+	-	CCNA_02761	hypothetical protein	72117	227668	202492	165076	790870	1178032	370	50176259128293	114008327069089	2891	46200	1620	86520	26553	39	127571475855	193514253980	229	3.05088e-10	7.16256e-09	3.65815
	3013060	3012116		-	-	CCNA_02860	DnaJ-class molecular chaperone	203300	331651	378042	465355	1152086	2199325	175	181419250887749	495034765317229	1346	83993	2368	157296	38813	18	653940908178	700808279251	103	2.83454e-09	6.36214e-08	3.70796
	3152816	3152607		-	cspA	CCNA_02997	cold shock protein CspA	164235	95646	58705	375935	332254	341526	275	29430641701	22678326360230	1666	9637	2400	18047	39337	11	10626386126	55096275462	136	8.41404e-09	1.82826e-07	3.61471
	3156322	3155705		-	-	CCNA_03002	CDP-diacylglycerol--glycerol-3-phosphate 3-phosphatidyltransferase	187649	1007636	514648	429530	3500316	2994054	502	831099927241023	2189022960959700	3734	34050	450	63766	7375	11	110069632411	82991424279	57	0	0	6.03362
	3264499	3263780		-	-	CCNA_03113	membrane-associated phospholipid phosphatase	167968	343377	472012	384480	1192819	2746011	247	389219480636821	689394672068461	2001	36422	11345	68208	185953	13	644207746608	1195216306414	176	5.15452e-07	1.01232e-05	3.50707
3266937			3266851	-	-	CCNA_R0180	small non-coding RNA	41632	49440	42871	95296	171744	249409	279	534999162736	3667668905189	1978	4841	45	9065	737	11	1117021995	1862652896	56	7.08567e-79	3.40529e-77	5.14247
	3335445	3335155		-	-	CCNA_03176	nucleotidyltransferase	550309	58299	20499	1259663	202518	119256	392	84698570501190	59991250611326	1811	64888	1634	121517	26782	46	382286628745	343688720967	254	0.00219642	0.0278645	2.83389
	3577696	3576740		-	-	CCNA_03409	alpha/beta hydrolase family protein	235405	384847	506288	538844	1336877	2945418	213	409474674613042	926902017129638	1679	53249	2850	99720	46713	11	94877612265	332955104089	76	1.17539e-33	4.52969e-32	4.46546
	3664090	3664677		+	-	CCNA_03506	putative transcriptional regulator	848289	2547856	2158042	1941742	8850717	12554785	1714	1.42939e+16	4.79698e+16	13235	628917	26193	1177791	429323	226	54548118414046	78656143308340	1366	0.00157929	0.0204806	3.27633
	3744558	3743953		-	sigT	CCNA_03589	RNA polymerase EcfG family sigma factor sigT	236709	632843	739013	541829	2198363	4299336	481	1147393085134280	2283268480042010	3872	134758	8472	252365	138862	47	589904382335	2979156244552	322	1.74749e-07	3.55149e-06	3.58795
	3744746	3744561		-	nepR	CCNA_03590	anti-sigma factor NepR	213259	623222	1013262	488152	2164942	5894828	1804	2890860394338590	3279277690968890	15318	177375	12001	332175	196705	206	901960500930	6228368746234	1421	1.96578e-05	0.000338828	3.43025
	3772262	3772717		+	-	CCNA_03617	Copper(I)-binding protein	234161	143499	139401	535996	498485	810989	205	3605214667830	81470478856938	1349	33132	2843	62047	46598	16	4921810665	179948201249	119	2.99658e-08	6.30981e-07	3.50286
	3991774	3991412		-	-	CCNA_03825	hypothetical protein	108537	316197	213379	248442	1098402	1241369	318	56429323821582	180203590313319	2376	49328	2853	92377	46762	29	66164103986	294404805574	191	5.77512e-10	1.32536e-08	3.63689
	3992325	3991771		-	-	CCNA_03826	conserved hypothetical protein	318047	799168	497294	728012	2776142	2893094	527	402956118916466	1780275388509540	3842	129577	5102	242662	83625	49	1325438632335	1952782388254	293	2.03927e-09	4.60245e-08	3.71288
