# Supplementary material for: Gene network analysis identifies a central post-transcriptional regulator of cellular stress survival
Source: eLife journal article supplement (doi:10.7554/elife.33684), 2018-03-14
Supplement: supp [file elife-33684-supp-v1.zip › elife_poa_e33684_Figure_5_source_data_3.txt]

>CCNA_02761_2923673_2923918
TTGGCCGTTAGGATGAAGACCCTGCGGAACACGCCTTGGCTGCTGGGGGCTCAACTGGCGTGCCTGATTG
TCCCCGCTGCGCTGAATATCGGAGGGGCCGCGCAAGCCTGGGTTCATGGCGCGCCAGAGGCGCTGATGTC
CGGATCGTTCCAGCTTCGGATCCTCGTGGCGCTGCTCCACGCAGCCGTGGTGATGGCCGGGGTCTTCATT
CTGCTGGCGATCCACCGGCGTGGCCTGCAGAGCTAG
>CCNA_03105_3255725_3255900
CCGCAGCGCCGAGCACAAGCTGCAGCGCGTGATCAAGGCCTATAAGCAGCTGCAGAAGTCGGGGATGGTG
TAGCCACCCCGTGTCATCCCGGGCGGCGAAGCCGACCCGGGGCCCAGGGGGTGACAAGGCGCTGTGCGGA
CCGCCAATGGGTCCCGGCTCTACAGCCCGCTGCGCG
>CCNA_01154_1257925_1258075
TCCCCAGTACCCGACCGACAAGGTCGAACCTGAAGTCGCGCCGCGTGTGGCGGTGGGGGCGGCCTCGCCT
CTGTGGCTGATGTTCGGTGGCGCGGCGGCCGCCGGCGCGGCCTACTGGTGGTGGGCGTCGCGCTGGCGCG
AGGCGGTGAAC
>CCNA_01344_1458500_1458775
CAAGGGGCCGACGCCGCGCGAGAGCGACGCCTACGACGCTCGGGAGATCGTCAAGGTCGTCGGCTACGGT
CGCGCCGAGGCCTGAGGAAGGCCGGGCGCGAAGGTATGGCGCGCGGCTGACGTCGGGGCGTGCTTCCGCA
GCCCATTTGCGCATGCCAGACTTTTCGCCAATGCGACCGCCCCGGCCTCGGCCTGAGGGCGGTCCGCGAA
CATGGCGTGCGCCCGTCCTTTCTTTGGAGACCCAGATGTCATCGCCCCTGCACAAGCTCTTTGACC
>CCNA_01303_1430500_1430675
CCAAGGGCAAGCTGGAAATCGCTCAGGCGGGCTCGGGCGGAGCCAAGGCCGGCACGTCTTCGCAGGCCGA
GGTCAGCATTGCCGGTTCTGGCGATGTCTCCACCCAGGCGGTCGCCGGCGACCTTGAGACCAATATCGCC
GGTTCGGGCGACATCTGGGTGGCCAGCGTCAGCGGC
>CCNA_00687_743325_743450
TCGTGCCCGGCGACAGGACGGGCATGGGGCGCTATCCGGTGACCGAGGTCCGTAAGCTGACGCCCGAAGA
GATCCAGGCCAAGCGCAAGCGCTGACCGGCCAGACCTCAAGCGCCAGACCTCAAGC
>CCNA_00167_179450_179600
TCGGGCGCATGACCGATGACTATCGCGCCCTCGGGCGTGAGGACCCGCCCGTGTTGATCATGCTGGGCGA
CTATGTGGATCGGGGCGCGCACTCGTCTGGCGTGATCGACCGCCTCATCGCGCTAAGCCAGCAGGCGGCC
GAGGGGCGCTT
>CCNA_02987_3142650_3142850
ATTTAGAGCCCTTTCAAACGCTTTAGATGATTCCATCTAAAGCTAAAGGGCTCTAGCGGAAGTCGGCTTC
AGTCCTTCGGCTCGCCGCTGTCGTCCTCGTCCTCATCGTCGGGCCGGGGCGTCGCGGTCTCGGCCGGCGG
GGGCGGCGGCGGATCCGCAGTGAGGAAGAAGCCGAGCAGCGCAACCATCCCGGCCAGCGGC
>CCNA_00587_616200_616350
GCGGTTCGCCTCGACGGCGGCCAAGCCGGGACCGCCGATCATCTATCTGGCCGGGGGGCCGGGCGGTTTG
GCGACACGCGCGCTGGCCGGACCGCGTTTTCCGATCATGATGGCCCTGCGCGAAGTGGCCGACGTCATCG
CCTTCGACCAG
>CCNA_03825_3991700_3991875
TTCCGACCAGAGGAGGGCGGAGCCTACTGGGATGAACAGAAGGCTCGCGAAGCACGCCGAGCGTCGGCGG
CGAAGGCGCGCGGTCGAGATCAGGCGGAAGGATGAGGGGGCGTGTTCACGCTCGGTCTGGCATGCCGGAG
GAAGTCGTCATGGATGCCCTTACTGTGCCCGCCGCC
>CCNA_03409_3577500_3577650
TCATCTTCTACATCGCGGCGGGCGGCGTGATGAGCGCGACGGGCGCCCCACAAATTCGCGGCAAGATGGT
CGAGATCGAGCCGGGGCGCGTGCTGCGCCTGGTTTGTGAAGGGCCCAGCAGCGATCGACCGGTCGTCTGG
CTCGAAGCCGG
>CCNA_03506_3664300_3664425
ATCCAGGCGCCCAGCGATCTCGTGCTGTTGGGGGGGCCGCTGGAGCGCGAACGCGGTTTTGTCTTGCATA
CTGACGACTTCAGCTCCCCGGACTCGACCCTGCCCGTCGCCGACGGCGTGGCCTTG
>CCNA_00894_974750_974900
AGGTCGGCTTCGATATCCTCAAGTCGCTGGGCCTGCGCCACCGGGGCGTCAACATCATCGCCTGTCCGTC
GTGCGCGCGGCAGGGCTTCAACGTCATCAAGACCGTCGAGGCCCTGGAAGAGCGTCTGGCCCACATCTCC
ACACCCATGTC
>CCNA_01335_1448550_1448700
GCGGGCGCGCTCGCCATAGTCTTCGCGTCGAGTCGACTCAGGTCGGCGTCCGGAACCGCTCCATGTCGAT
CGCCCTGGAGGCTGTGGGCCTCACCAAGACGTATGGGGCGGTGCGCGCCCTCGACGACTTTTCCATCGCC
ATCCCCGCCGG
>CCNA_03176_3335155_3335445
ATGACCCTCGACGAGGCCCTCACCAAACTGCGCGCGGCCAAGCCGCTGCTCGACCGCTACGGCGTCGCGC
GGGTGGGCGTGTTCGGCTCCACGGCGCGCGGCGAGGCGGGGCCGGACAGCGACGTGGACGTCCTGGTCGA
GTTCGCGCCGGAAAAGCACCCAGGCTTGGACTTTTTCCGGTTGCAGGATGACTTGGCCAATGTGCTGGCC
AGCGAGATCGACCTTGTGACGCCTGATGGCCTGCACCGGCTCGTGCGAGACCGGGTGCTGCGCGAAGTCG
CCTATGCTTAA
>CCNA_03976_2923462_2923683
ATGCGGAGCTACGCCCTCATGATCGTCGGTACCGCGCTGATGCCCGCCTGGTTTTTCGTGGAATGGCTTC
GCGGCAATATGTCCGGCGCGGCCGTCATAGCCATTACGGCGGCCTTCGCGATCATGTGGCTGTTCTATTC
GGCGGTTTGGCTCGCCATGACGATATGGCGACGCCGGGCCGAGGCGCAGTCGGCATCCCCTCCCCCAAGC
TTTGGCCGTTAG
>CCNA_02997_3152607_3152816
ATGGCGACTGGAACCGTGAAGTGGTTCAACTCCACCAAGGGCTTCGGCTTCATCCAACCCGACAACGGCG
GCGCGGACATCTTCGTCCACATCTCGGCCGTTGAGCGCTCGGGCCTCGGCTCGCTGAACGAAGGTCAGAA
GATCTCGTACGAGCCCGAAGTCGACCGCCGCAGCGGCAAGACCTCGGCCGGCCAGCTGCAAGCGGCCTAA
>CCNA_02286_2435400_2435550
GACCGCATGGCCGCCGGCTATTTCCTTGTCATCGCTTTGGGCGTCGCCGCCGCTATCTTCGGCGTGGTTC
TCTAAAGCCGACAAGTCGCGATCGGTGGGCAGGCCTTGGGCCGCCCACCGCCGTGTTCCGCGTCGCCCGG
CTTGAACCTCC
>CCNA_R0100_165492_165575
GGCGGGGCCTACATGTCGCGCAAGTCTCCGGAGGGCCATTCCGAGGCGGGGCCCGCTCCAGCGTCCTCAT
TGGAGCGGGCGTCT
>CCNA_00913_993125_993275
GAACCTTAAGTAGCTCCGTCCGGGCCGACGCGTTCAGATGCCGCGTCTTCGGCTCAGGGACTCTCCATGG
CGTTCAAGTTTCGCGCGGCGGCGCTGGGCGCACTCATGCTCGTCGCCGCCGGCGCGGCCCAGGCGGCGGT
TACGCCTGCGC
>CCNA_00882_962825_962975
TCCCAGGGAACCTCTGCGCCCACCGGCGCTTATCGTCTCCGCAGGGGCGGACGCCCCCGGATTGGCGACC
CGCTTTCGGGGGGTCGGCCGTCGATCCGTTCGATTGAACGGAGACCACCACCATGACGTCCAGAATCCTG
GTCACGCTGCT
>CCNA_03002_3155700_3155850
CGTGGAGCGCCTTTGGCCTTCCGCCCGAGCCGGCTCTGGTCGGCGGGTTCACGCTCATCGCCCACGGCCT
GCTGTGGCTGGCCACGGTGGTCACCCTGGTCACCGGCGCGCAGTACTGGGAAGCGGCCCGCAAGGCGCTG
GTCTAGGCGGG
>CCNA_00424_434325_434450
ATCCTCGAGCGCATCATCGCCGAATATCAGAAGCGCTTCGAGGACATGGCCAAGGCCATCACCGAGGAGA
TGGGCGCCCCCGCGTGGCTGGCCCAGCGCGCCCAGGCCGCCATGGGCATCGGCCAT
>CCNA_03590_3744450_3744625
AGCCGGTGCCCGACGAATTTCTCGCCATCCTCCGCAAGGCCGAGCGTCCGGCGGGGGGCGAGTAGGCATG
GTCGCGGAACAGGTCGGACGCTCGCCGCCGGATCCGGTCCGGGACAACAGCTTCAAGCGTGAGCTGGTGA
CGCTGATCCCGCACCTTCGCGCTTTTGCGCGCACCC
>CCNA_02595_2743475_2743675
CCTTTTTTGTTGCGCCAAGGCCTTGAACCGGATCGCGCGGGCGCCTAATTGCGGTTCAGCGGGACCGGGC
CCCTCTGGCGAGCGATGCAAGCGCTTGTGATGTCGGACCGCATCGGGTGTTCTCGATGTCTGGGTCCGGC
CGCCTAGCCCCCCTCCCCAAAAGGCGCCGCCTCGCATCGAGGACACCCGAGCATCCTTTTT
>CCNA_01058_1159025_1159175
CTTCTATGATCCGATCACCTACGAGATCCTGTTCAGCGAAGACTAGTTCGGTTATCGTGTCGTCTGCTAG
CGTGTTTGGGCCGACGGGGGGTCGGCTTTTCACCTAGGCTTGGGGAAGCTTCCGCCGTATGGCCGCACAG
GTCCTGTCGTT
>NA_3692375_3692550
AGGTCTTGCGAGCCGCTCTCAATTTTCTCGACAGCGGGGTTTCGGGGCGCGAGGATCGGCGCATGGCTTT
CGCCGTCCAGGACCGCCGTTCGCGCCGCCGCCGCCTCACCCGCGTCGAGCGCTGGGTGCTGGACGGGATG
GGCGGGGTGCTGCTGGCCACCGGCGCGGTCGGGGCG
>CCNA_R0035_1549367_1549443
CGGAGCGTGGCGCAGCCTGGTAGCGCACTTGACTGGGGGTCAAGGGGTCGCAGGTTCGAATCCTGTCGCT
CCGACCA
>CCNA_01996_2143575_2143750
ATGCAGGTCTAATCGCCCGCATCGCGAGTTTTCATGGGGAGCGTAGAGGGAAGGTTGAAGCGAATGCCGG
CGACCACCGGTCCGCAGGACGTTTCGGGACGCGCCGGGGGGCCGGCGTCCACGGAGCGCCTGCACGTGGC
CATTATCATGGATGGCAACGGCCGCTGGGCGAAGCA
>CCNA_02286_2435325_2435450
AGGCCTTGGGCCGCCCACCGCCGTGTTCCGCGTCGCCCGGCTTGAACCTCCGCCTCGGCGGAGCTAACCA
GAACCGGACGCGTTAGCCCCCCTGGCGCTCATCTGTTTGACGCGTCGCGGGCCTTT
>CCNA_01024_1111617_1112111
GTGGACGGTTGGACCGATCATCCCGAATCCGTAGCTCGATGCGGGGATACGCCTGGGCCAGTGGCGGGGG
GAGAGGTGTTGGTCCGCATGATCCTCAAGCGTCTGGTGGAGCCGGCATACGATCCGTTCGAACGCAAACA
GCTCTGGCCAAAGCCAGGGTTTAGCAACTTGTGCGGAAAGTCTGAGGGGATTTCAGTGGTGCGCCAAGCG
GGCGAACTGCCTCTGGAAGAGATAAGGGCTTCGTGCGCCGAGTGGGCTTACGCAAGGTCGAACCGCGAGC
CAGACGGAGCGCTCACGGCGACTGCGGCAGCAGTCAGACAGATCCGAGTTGCTCATTTCAAAGACGATGA
GCAATTATTCTATGTGTATGACGACCCACGCGATGGCGACGGGCACGCAGTCATTCGTGGTGCATCGACC
GTTGAGCGAACCGACCAAGATGAGATTAGGGCCGAGCTGGCGCGCATTTTTGTTCATTCGATCAACCAAT
CTTAG
>CCNA_03618_3772650_3772800
AGCCGGTCAAGGTGACCGCCGTGGTCAAGATGCCGCCCAAGCCGGCGATGTCGGGGATGCATCACTGATG
CGGGCCATCGCTCTGACCCTGGCCCTGCTGGCCGCCACGCCGCTGGCCGGTTGTGGTGAGAAGGCCGCGC
AAGACGCGGCC
>CCNA_00930_1006425_1006700
CGGACTTCTTCGTCAGTCCCGAGACCCTGGACCGCACCAATCTGGGCGGCGCGCGGGCCGGTCACAGCGT
CAATCTGGAGCGGGCGGTGACCTTGTCGACGCGGCTGTCGGGGCATCTGGTCCAGGGCCATGTCGACGGC
CTGGCGCGGCTGATCGAGCGTCACGACGACGGCGGCGCCTGGCGGGTCGTCTTCAGCCTGCCGGCCGGCC
TGCACCGCTTCTGCGTCGAGAAGGGCTCGATCGCGCTGAACGGCGTCAGCCTGACCCTGAACACGG
>CCNA_R0108_472905_472973
CCCCCTCGCCACCCCACCGGTGAGGCAACTTGGGCGGCGCCCTATCGGGGGAGGGCCGCCCGTCCTTGC
>CCNA_R0044_2059848_2059942
GTCGATCGGTCGCCGCGCCCATCCGTCCCTCAAAGCGGCGATCGGTTCTCAGGCAAGTCCTGCGGAGACG
CGCCGCCTCCCCCAGGCGGCGCGTC
>CCNA_00897_976013_976177
ATGAAAACCGTTTCTATCCGCGAGGCCGCCGCTCGGCGCATGGCCCGCACCCCGACCCCGCCGCGTGCGG
CGGTCGCGCCCGTCCGTCCGGCTCAAACCGAATGGGCCTGGCCCGGCATGACCCGCGCTGAGCTGCGGGC
CGAGATCATCGAACAGATCGGATAG
>CCNA_02089_2237967_2238341
TTGACGGCTCCAAGGTGCGGCGGGAGGCTAGGGCGCATGAAGGCCGCGCTCAAGTCGGGGAAAAAGTCTG
TCGACCGCACGCAGCTGGCGTTGATGACGCTGGCGACGTGCGTATGCGGCGTGCTGGCCGTGCTGGGCGC
TGTCCTGGCGATTTTCACGCCTCTGGTCTTTGACCGCGCCGGCAACGCCCTCAATCCGATCGCCTGGCTC
GGCTTCGCTTTCGCCGCCCTGTTCTGGGTGGTCTGCTTGCTGGGCCCGCTGGCGGGCTGGATCCTTTGGC
GCAAGGGCGCGTCGCCGCTGGCGTGGGCCGCCATGATCACGCCGCTGGCCTGGGGCGCGGCGACGGTCAC
GCTTCTGCAGTTCGTGCCGGTCTGA
>CCNA_01966_2110175_2110325
CGCCCACGGCCGCTTTCTGGATGTAGCCCTTGCGACGGTCGGGGAGGCGACGGCGCGAGCGGTCGCGCTC
GACGATCCGCTCGACGACGCGCTCGGTCACCAATGGTTCTCGCGCCGGAGCGGGGCGGGGCGCTTCGGCC
GTCGGCTCCTC
>CCNA_03338_3519375_3519525
TTCCGCGAGGGCCCGAGCGGTAATCCGCGGCTGTGGACCGTCGATATCACGGGGCGGATCCTGCGCCCTG
CGGCCTACAGCGGTTCCGCCTCCGACCCCGCCTGGTCGCCCCTTCTGGACTAGGCTCCGAGTGGGGCGCG
CAACCTTAGCC
>CCNA_03138_3286850_3286975
GGCGTTGAGCCGGAAGGCGGCGCGATCGAGGCCCAGGGCTTTGGGTGGGCGAGCAAGCACGGCACGGGCA
AGGGCCCCGACGCCATCACCGGCGGCCCGGAAGTGATCTGGACCCAGACGCCCACG
>CCNA_01080_1184375_1184500
TCCTGCCGCCGACCTCACCGCCCAGGCTGGTCTCCTCCTATCCCGCCCAGGACCAGGTGGTGGCCCCCGG
CGTGCTGATCCTGAAGGTCGCCTTCGACCAGCAGATGTCGCCGACCGCCTGGAACT
>CCNA_R0089_3874325_3874475
ATCCCAAAAAAATCCCGGACTAGGTTCCGCGCCTCTTCGGGGGGCGACGCAAGTTCGAAACGCCGAAGAG
ACCAACGATTTCCGAGAGTTACCGCAAGGTTTTCTTAGAAAGAATTGGGGCTATAGCTCAGCTGGTAGAG
CGCTTGAATGG
>CCNA_02064_2215400_2215600
CAATCCGAAACAGACTTTGCTTTGCCGCGACGCAGCGACGCACCTAAATGCTATCTGGGGGCGAAAGGTC
GGCCGTAGAGTCGTCCGCTAGCCAATAAGGGTCTCGAGTGTCGGCTTCGGGTTATTTTCAGCACACGGTC
GCAGGACCGGTGATCTTTGCGGGGATCGGCCTGCACACGGGCGCGCATGTTCGCGTCGCCG
>CCNA_02846_3000050_3000225
AGAATGACCGCTAGGAAGTCGGGTTTCATTGTGGGCGCCGTCGCCGGCGCGAGCGTGGCCTGCGCGGCTC
TGGCCGGAATGGGCATGCGGATGGGGACGGCCGACGCGGCCCAGGCCCCGGTCGTCCGCGTGTCCACCGC
CAGCGCGCCGACCTTCGCGCCGCCGCCGGGCGCGCC
>CCNA_03590_3744625_3744775
GGGCGCCGATGAACTTCGGCGTCGAGGACATGATCGAACACGTACCGATGGAAGACAAACGCAAGGGCGC
TGCGGCGCTGGATGAAGCGCGCCTCCGCCAGCAGGCGATCGGCGTCAAGCTGCGGCAGATGTTCGACGAG
GTCGTCAACGA
>CCNA_01080_1184475_1184600
GCAGATGTCGCCGACCGCCTGGAACTACGCCCCCGCCGCCGGCGCCGAGCCTCTGGACTGCGTGAAGACG
CCGCGCCGGCTGGCCGACCAGAAGACCTTCGTCCTGCTGTGCCGCGTCCAGGCGGG
>CCNA_00416_429575_429775
TATCTCGTCCGCGGCGAGGCGTATCCGCGCCCGCGTAGCTGGTTGATTTAGAGGCGCCACCTCCGTCCGG
CGCCCGTCTACGGATCATTCCGGCGGCTCCCTTCCCCTGTCAGTTGAGACGGCTCGACGGGGTCGGGGCC
GCCGGATGACTAGTGCGGCCTGGCGGAGGGACGCCCGTGGTGGGCGAACGTCTGGGGGACG
>CCNA_02758_2921763_2922152
ATGAGGAAGACCGTTCTGGCGCTCGCTGTCGCGGGGCTGGCCCTCGCGTCGTGCGGCCCGTCCGACCCCG
GCAAGCCCGAGGGCGGCTTCATCATCGGCCTGCGGGCGGTGTTTGCGTTCAAGACCTGCACCAGCAAGCT
CGAAGAGCGGTTCGGTCTGAAGGAGATCGCCGGCGTCACCTCCAACGACATGGACCCCCAGCCCACCGGC
CGTCCGGGCGAATGGGACGTCAAGTTCACCGCCGATGTCACCGAGAAGGAAAGCGGGCGGGTGACGCGCT
ACAAGGGCGTGTGCCGCGTGCGCCGCGACCAGCCCACGACCCTGGACGCCAGCTTCGTCAAAGAACTCAA
GGCGGGGACCGACGTCGTACGGCGGGTCCGCCCGGGCTGA
>CCNA_02034_2178450_2178600
GCCAGGACGTTCCCATCTGGATTCTGGGCTCCTCGACCTGGGGGGCGCAGCTGGCGGCGGCGCTGGGCCT
GCCCTACGCCTTCGCCGCGCACTTTGCGCCGGACGCCCTGATCGAGGCCCTGACGCTGTACCGCCGCCAT
TTCAAGCCGTC
>CCNA_02975_3130250_3130425
GCGGGGGATCGGTTTGTCGTCATAGAACTGGCCCAGGAACGCGGTGATGATCCGCTGCTCTTCGGTGACG
GTTTCGTCCTCGGGGTCATCCGCCGCGCCGGTGATGCGGGGGAAGTAGGCGCGGTTGCCCCAGTTCTGGC
CGGCCCGGAAGAAGAACACCTGCACGCAGGCCTGAC
>CCNA_R0180_3266851_3266937
GCCCGTCCGCCTTCCGTCCCCAAGCGCGGCGGATGCGCCGCGGAGCCTCCCCTGACACCCCCGAGTTTCG
GCGGGAGGCTCCGATGG
>CCNA_01303_1430600_1430775
CACCCAGGCGGTCGCCGGCGACCTTGAGACCAATATCGCCGGTTCGGGCGACATCTGGGTGGCCAGCGTC
AGCGGCAAACTCGAAGCCAATATCGCGGGCTCCGGCAACATCACGGTCGCGGGCGGTCGCAGCCGTTCGG
TCGACATCAGCGTCATGGGCTCGGGGGATGTCAGCT
>CCNA_02860_3012450_3012600
ACCTGGAAGACGCCATCAAGGGCGGCAAGAAGCGCGTGGCCTTCTCGGACGGCCGCACGATCGACGTCAC
CATCCCCACCGGCGCCCAGGAGGGTCAGACCCTGCGCCTGAAGGGCCAAGGCTCGCCGGGGCGCGGCGGC
CAAGGCGACGC
>CCNA_03888_761965_762324
ATGATCTCGACCTACGATACGAAATTCTCCACGCGCCTCGAAACCGCAGCGGCCGCCAAGGCGCTGCTGA
TCGCCAAGCTGCGCCCCAAGGCGGCGGTCACCGACCCGCTGTTTGCGCAGCGTGAGGCCTTGCGGGCGGT
GGAGCTCAACGCGGTCCGGGCGGCGCGCCTGCAGACACGCGCCGACGCCAAGCAGGCCATCGCCGAGGCG
CAAGAGGCCGCCGTTCAAGCGCAGGCCGCCCTCGACGCCGAAGCTCTGGCCGCCAAGCGTGGCGCCCGCA
AGGAGCGCAAGGTTCTCAGCGCCGCCGACGCCAAGGCCAAACGTGACGCCAAGTACGCTGCGCGCCAAGC
CCGCCGCTAA
>CCNA_01711_1843725_1843850
CGAACCGGGGAAGATCGACTGCTGCGCGCCGAAAAGCCTGGCGTCGGTCCCGCCGTGATTGGCGCCGTGG
CGCCGTGCGTCGTGCTGCCGGCGGACTTCGACCGACAGTACACGCCCGAAGAGCAG
>CCNA_03138_3285950_3286100
AACAATCAATTTTACCAATGGCGAAAAAGAGCGGCTTCTAGGCGCGTCGGGGTGATGGAAACACCTGCGC
GGAGGAACACGCCAATGGACGCCAAGGTCGAAGACAATATCGCGGGCAAATGCCCCATGGGCCACGGTCG
TGGTCCCGCCA
>CCNA_R0016_844332_844401
CCCCTTCACCACCCCACCGGTGAAGCAACTCGGGCGGCGACCTTTTCGGGGGAGGGCCGCCCGCCCTTAC
>CCNA_01584_1699625_1699775
CACAGTTTGACGACAGTTTTAAGGCAGTAAATCCGTCGATCGACGAAGCTCGACCCATTCCTCAGGGGCG
CGGCTCCGGCGGCGGGGGGGCCAGCGGAACGCCGCTATTGGCCGGCGGGGCGGGTTCGTCGGTAGGCGAG
GTGAACGGCGC
>CCNA_02846_2999175_2999325
CTGATCGAAAACGGCAAGGTCGTGCGCGGCTATATCGGCGTGAGCATCATGGCCTTTAACGCCGAGATGG
CTGAAGCCCTGGGCATGAGCGATGTGAAGGGGGCGATCGTCGCCTCTGTCGTTCCGGGCGGTCCCGCCGC
CAAGGCCGGCC
>CCNA_03113_3264350_3264500
CTTGTATCGTCTGGACGTTCGGAGACTCTTCGCGGCGGCCGGTCGCGAGATCGGGGTGGCCTCCGCCCTG
CTGATCGTGGCGCTCGGGGCCTGGGGCTTTGTGGGGATCGCTGACGAGGTGGTCGAGGGCGAGGCCCATG
CCCTGGACCTG
>CCNA_01660_1781300_1781625
CCGCCCTGGGCGAGGATATCGATCGCAACCCGCCCCAGGAAAACGAGGATCTGATGGATCGGGGGCGCAA
GGCCGCCGGTGACGCCGCGCTGGGCGCGATCGCCAGCACCGCCCAGGATCTGATTCCCCTGCGCGGCTGG
GTGCGCAAGCTGACCGGGGCCGAACGACACGACAAGCTCGTGCAAAGCGCTATAGCCTCGGGCGCTGTGC
GCCGGGCCTATCTGAAGGGCCTCGGCGAAGCGCGCGGCTGTCCCCCGCCGGCCACGCCTCAGCACAAGCC
TCCCACAGCGCCGCCGGTGGTCGATCCCGGCATGCCGCCGCCGCCT
>CCNA_00930_1006225_1006475
ACCGCCGACCAAGCCTGAGGAGGGCGCGATGTTTTCCGGGATCATTGAACGGGTGGGGCGGGTCGAGGCG
GTGACGCCCGAGGCGGGCGGGGCCCTGCGCCTGAGCCTGGCCACCGGCTATCCCGATCTGGAGCTGGGCG
AGAGCGTCGCCGTCAACGGGGTCTGCCTGACCGTGGTCCGCCATGACCCGGGCGGCGAGGCGGACTTCTT
CGTCAGTCCCGAGACCCTGGACCGCACCAATCTGGGCGGCG
>CCNA_R0061_2800425_2800575
GTGAAAGGGTGGGGTAAGAGCCCACCGCGGACCTGGTGACAGGGACGGCATGGCAAGCCCCGCCTGGAGC
AAGACCGAATAGGGATCCCGCGTCGGCCTCGCGCCGACTAGGCCGTCACTGGCTGAGAGGATCCGGGTAG
GTCGCGAGAGC
>CCNA_01304_1431129_1431329
GTGAGCTCTAGGGCTCAAACGCGGTTCGCGAGACGCCCGGACATAGCGCCGCCAACCTCTTTCGAGAGGG
GTGCAATATCTGGTCATCACCCCCGACAGGCGACTGTTGGGGACATTTGTTTTGCGGACGCTGCGTACGG
AGCCCACCTGGGTTCCGAGTTGGTCTTTGAAATGGTTCGAGACGCGGGCGCAGCCCACTAG
>CCNA_03681_3843650_3843800
CATCTCACTGTTGGGGACTAGGGCTAGGACGCCCGTCGGGCGGGTGTCGACATCCGGGACGACGGGCGCC
GAATTGGAAACTTTGGAGCTTGGCTCCGCTGCGCAGCTTTGGCCGCGCGGCGATCCGGCTTCCATCGGGG
GCATTAGGAAG
>CCNA_03506_3664050_3664225
CCGACTTGAAACCGTCACAACGAACGCCAATGCTTGAGGTATGGCCAGCTTAATCGACGATGACGACGGC
GAGTTCCTGATCGGCAGGCTGCTCGTCGCCATGCCCGGCATCGAGGATCCGCGCTTCGAGCGGACGGTGC
TGTATCTGTGCGCTCATGACGAGGACGCAGCGATGG
>CCNA_02217_2364081_2364383
TTGACTATGAGCGCCGACGAAAGGACCACGATGAGCACCGTCGCTTCGCCCCTGCGGAACCTGGCCTGGC
TGGCCGGCGCCTTGGCGACGTCCGTCGCGGTGGTCGTGGGCGCGGTGTTGGCGGTCATCTTCGCGGCCAC
CGTGGTTGTGGTCGGTTTCATCGGCAGCGCGCTTTTCGGCCTCGCCGCTTTCGCATTCCGCGGGCGCAAG
GTCGCCAAGACCCCGGCGGACGATGGCCTGATCGAAGCGCGCAATGTCGGCGGCCACTCCTGGGTGGCTT
ATGGCTGGAACGAGCGCTCTTAA
