# Supplementary material for: Gene network analysis identifies a central post-transcriptional regulator of cellular stress survival
Source: eLife journal article supplement (doi:10.7554/elife.33684), 2018-03-14
Supplement: supp [file elife-33684-supp-v1.zip › elife_poa_e33684_Figure_8_source_data_1.xlsx]

## Sheet: not enriched
CCNA	LFQ	RPKM
CCNA_02190	0.155765	0.393733
CCNA_02194	0.0178787	1.3686
CCNA_02198	0.0231897	0.576029
CCNA_02203	0.0901251	-0.28958
CCNA_02207	-0.000210682	0.20062
CCNA_02204	0.0346851	-0.461157
CCNA_02754	0.246114	-0.369419
CCNA_02208	0.116122	-0.355819
CCNA_02753	0.0721245	-0.2414
CCNA_01956	0.177273	0.320032
CCNA_01955	0.519459	0.502078
CCNA_01954	-0.0324055	0.836702
CCNA_01950	-0.0118608	0.223287
CCNA_01959	#NAME?	-0.0319105
CCNA_01089	0.0311332	-0.578145
CCNA_01084	0.198418	-0.0454279
CCNA_01087	0.177135	0.318941
CCNA_01083	0.252175	0.585924
CCNA_03810	0.217701	0.474955
CCNA_03816	0.0682735	0.90624
CCNA_03817	-0.0889887	-0.511843
CCNA_02759	0.0569816	-0.506595
CCNA_00918	0.0934096	-0.640793
tipN	0.0456557	0.419031
tolA	-0.156709	-0.360263
CCNA_02756	0.0648362	0.101465
cheD	-0.178857	0.0735004
CCNA_02964	0.00408355	-0.154537
CCNA_00869	0.0578851	0.320188
CCNA_02961	0.101142	-0.0765734
glk	-0.0537437	-0.318292
gpsA	0.109978	-0.758993
gltB	0.0186957	0.521967
cspC	-0.244365	-0.496135
CCNA_00267	0.101586	-0.297275
CCNA_00264	0.0804305	0.197728
CCNA_00265	-0.0171898	0.36492
CCNA_00262	0.0237307	-0.474075
CCNA_00261	0.0290101	-0.195517
rsaD	-0.0386526	-0.0942426
rsaE	-0.101742	-0.0236519
rsaA	0.24927	0.295214
CCNA_00128	0.131529	0.840686
CCNA_00124	-0.237814	2.33069
CCNA_00123	-0.000186054	-0.402871
CCNA_01430	0.0751795	-0.0805434
CCNA_01431	-0.113719	0.384671
CCNA_01432	-0.00568078	0.3853
CCNA_01438	0.248065	0.0539504
CCNA_01439	-0.0108141	-0.456584
era	-0.00917613	0.981626
CCNA_00708	0.397838	-0.008228
CCNA_02983	0.28896	0.48758
CCNA_00088	0.26362	1.05903
CCNA_02986	0.430463	0.335102
CCNA_00422	0.181606	-0.380251
CCNA_00695	0.00715078	-0.0981627
CCNA_00690	-0.148431	-0.023885
CCNA_00699	0.0670389	0.231188
CCNA_01509	0.257308	0.362004
CCNA_00055	-0.0883219	1.1844
CCNA_00054	0.00772333	-0.0502608
CCNA_00059	0.00886216	-0.0552778
CCNA_03561	0.0217696	0.249602
CCNA_03563	-0.100281	0.854648
dprA	-0.151041	-0.509673
CCNA_00589	-0.13557	0.073716
CCNA_03761	0.0661068	0.773847
CCNA_03767	-0.181679	0.282009
CCNA_03764	0.0448193	0.233921
CCNA_00582	-0.176892	0.85453
CCNA_03769	-0.0145778	-0.266621
CCNA_01559	0.125762	0.245311
CCNA_00585	#NAME?	-0.003878
CCNA_01558	-0.00926907	-0.189141
CCNA_00364	0.0422262	0.306324
CCNA_01618	-0.0916801	0.229585
CCNA_01610	-0.0441522	0.403936
CCNA_03360	0.204337	0.167575
creS	0.0160813	0.978854
CCNA_02362	0.0100216	0.0212265
CCNA_03104	-0.00655948	0.0556729
CCNA_03102	-0.0164422	-0.2886
fadJ	-0.0753671	0.248519
CCNA_03108	0.0983555	0.72162
ompW	-1.07451	0.378894
CCNA_00472	0.0286358	-0.6657
CCNA_00678	-0.103671	0.387891
CCNA_02569	-0.15371	-0.0674046
CCNA_00671	-0.0540268	0.333183
atpD	0.0838505	1.01474
CCNA_02558	0.0826903	-0.441164
CCNA_00677	-0.0946377	-0.00147
CCNA_02564	-0.75113	-0.137128
CCNA_02180	-0.0230475	-0.0906141
CCNA_02182	-0.00517401	-0.487505
CCNA_02185	-0.068233	-0.313885
CCNA_02186	-0.17183	0.031421
CCNA_02189	#NAME?	0.0578306
CCNA_02743	0.20483	0.762261
CCNA_02213	0.126393	-0.393545
CCNA_03619	-0.0464933	-0.214617
CCNA_02747	0.0138525	0.0261448
CCNA_02219	-0.0458908	0.258128
ftsE	#NAME?	-0.166344
CCNA_03582	0.13708	-0.26148
ftsN	-0.264288	-0.245244
zwf	0.079597	0.372714
ftsH	0.0440837	0.359017
CCNA_02698	0.195655	0.0453505
CCNA_02691	#NAME?	-0.584372
ftsZ	0.14732	0.71612
ftsY	0.0356641	-0.12207
cheYI	0.251779	-0.244023
CCNA_03807	-0.0665396	0.29914
CCNA_03806	-0.133711	-0.351634
chvI	-0.0991444	-0.399431
CCNA_03803	0.020792	0.114834
CCNA_03802	-0.0565214	-0.213261
CCNA_03801	-0.128907	-0.305884
hemE	-0.006086	-0.128745
chvG	-0.0831762	1.41607
CCNA_01982	0.0548858	-0.196139
CCNA_01983	0.0038924	0.7718
ligA	-0.019035	-0.258783
smc	0.0170708	-0.339393
CCNA_00909	-0.0959236	-0.198118
prfC	0.105193	-0.194189
spdR	-0.123528	-0.419597
zapA	0.114316	1.0564
CCNA_01180	0.676398	0.153059
CCNA_01183	0.0263682	0.132278
CCNA_03970	#NAME?	0.0375882
fixJ	-0.273878	0.615388
glyS	0.079908	-0.0397795
glyQ	-0.0110279	0.225394
CCNA_00871	#NAME?	0.0643311
CCNA_00878	0.181761	0.0244982
CCNA_01050	0.0353962	-0.0465796
CCNA_01051	-0.0194595	-0.139546
CCNA_01056	0.0158491	-0.512703
CCNA_02525	0.139495	-0.082615
CCNA_01055	-0.0864324	-0.101243
exbB	-0.0991286	1.67523
exbD	-0.146548	-0.29837
CCNA_00277	-0.00850718	0.322707
CCNA_01723	0.178884	0.634041
CCNA_00111	-0.0841848	0.181839
CCNA_00115	0.332381	-0.411417
CCNA_00116	0.0608434	0.703639
CCNA_00117	0.0321411	-0.0442864
CCNA_01423	#NAME?	-0.0787995
CCNA_01421	0.0171324	0.757309
CCNA_01425	-0.000756947	0.660911
CCNA_00065	0.132463	0.918083
CCNA_01519	-0.322023	-0.281322
CCNA_03577	0.194401	-0.225387
CCNA_03575	0.175158	-0.18251
CCNA_03574	-0.234115	-0.124778
acnA	0.0539155	0.0892954
CCNA_03771	0.430087	-0.251883
xylA	0.00394332	-0.409592
CCNA_03774	0.129869	-0.287104
CCNA_03777	0.0848254	-0.173895
popA	0.123013	-0.543117
CCNA_01603	0.0614728	0.875634
CCNA_01601	-0.467806	0.572905
CCNA_03378	0.0184223	0.268754
CCNA_01604	0.154143	-0.5886
popZ	#NAME?	1.45741
CCNA_03371	0.0275795	-0.201941
CCNA_03373	0.185435	-0.597768
CCNA_02350	#NAME?	0.0512032
CCNA_02352	0.0342593	0.681163
CCNA_02426	-0.198736	-0.247809
CCNA_02357	0.0886593	-0.0223188
CCNA_02428	0.0929398	0.007831
CCNA_03115	-0.034681	0.141452
CCNA_03112	#NAME?	-0.272334
CCNA_00483	0.11297	0.490319
CCNA_00487	0.369421	-0.0284571
CCNA_02518	-0.0176126	0.195112
CCNA_02519	0.0531806	-0.343798
CCNA_02516	#NAME?	0.137196
CCNA_02224	0.0531023	1.48556
CCNA_02737	-0.15778	-0.0127951
CCNA_02734	-0.0920944	0.250061
CCNA_02221	0.149698	-0.183091
CCNA_02222	0.0713799	0.981453
CCNA_02223	0.149497	-0.0696582
surF1	#NAME?	0.616595
CCNA_03603	0.0620967	-0.366131
CCNA_03607	0.0633705	0.683461
CCNA_03599	0.225501	-0.320191
CCNA_00446	#NAME?	-0.0200733
CCNA_01991	0.0514353	0.240532
CCNA_01997	-0.0821022	0.498703
CCNA_01994	0.157758	0.292034
CCNA_02642	0.216102	-0.0559037
CCNA_01999	-0.0103859	-0.008123
CCNA_02641	0.212443	-0.129719
CCNA_02416	0.0732261	1.02499
CCNA_01199	-0.0277128	0.42798
CCNA_01196	0.0047234	0.00222
CCNA_01194	-0.153076	-0.523738
CCNA_03909	-0.151548	0.163742
CCNA_00803	0.179919	0.0007498
CCNA_01042	0.0269259	0.749575
CCNA_01046	0.0589913	0.197772
lepA	-0.0215938	-0.0591153
glnE	0.0364525	-0.022615
glnD	-0.0367592	-0.483469
CCNA_00104	-0.12145	0.299768
CCNA_00103	-0.158557	-0.137378
CCNA_00100	-0.147974	0.0427429
CCNA_01453	-0.0778949	1.82024
CCNA_00109	-0.0393961	0.14405
CCNA_00108	#NAME?	0.467887
CCNA_03294	0.0127624	0.0261734
CCNA_01297	-0.138092	0.751136
rsmB	-0.129217	-0.459616
CCNA_00401	-0.249912	1.46886
pgl	-0.125112	-0.162036
CCNA_00078	0.0564346	0.11965
CCNA_00073	-0.086857	-0.450894
CCNA_00072	0.0836596	-0.0602977
CCNA_00070	-0.0289179	0.0816078
CCNA_00075	0.269272	-0.0723102
CCNA_00074	0.0801993	-0.39258
CCNA_03090	0.0134694	0.0222447
CCNA_03296	#NAME?	0.589729
CCNA_03745	-0.03192	-0.444388
CCNA_03740	-0.0304019	0.325229
CCNA_01974	0.0513127	0.228487
CCNA_03748	-0.130745	0.0294311
CCNA_03299	0.237536	-0.180927
stpA	0.282353	0.432941
stpC	-0.127	-0.296613
stpB	0.075573	-0.0529849
stpD	0.374014	0.575644
CCNA_01672	#NAME?	0.385334
CCNA_01673	#NAME?	0.0272908
CCNA_01670	0.100011	-0.352672
CCNA_03347	#NAME?	-0.445948
stpX	0.249989	1.07243
CCNA_01678	0.122464	0.15983
CCNA_01679	0.206048	-0.0259948
CCNA_02431	0.111799	0.0880336
CCNA_02346	0.162955	-0.003233
CCNA_02344	-0.0171947	0.269974
CCNA_02435	0.0626012	-0.232914
CCNA_02342	-0.0850376	0.44258
CCNA_02340	0.0548718	0.790019
CCNA_03126	#NAME?	0.147369
CCNA_03127	0.0575798	-0.305501
CCNA_00491	-0.0855332	0.0602068
nuoB	-0.0870604	-0.296055
CCNA_00492	-0.0396193	-0.141434
CCNA_00657	#NAME?	0.007634
CCNA_00656	0.211574	-0.0104145
CCNA_02505	#NAME?	0.608171
CCNA_02504	#NAME?	-0.79426
CCNA_00658	-0.00138643	0.0898206
CCNA_01706	-0.239854	-0.0627991
nuoG	0.0836451	0.24736
CCNA_02231	0.0442818	0.0650033
CCNA_01859	#NAME?	-0.24911
CCNA_02237	0.0884372	-0.20566
CCNA_02236	-0.00150803	0.257361
CCNA_02235	-0.134669	-0.564661
CCNA_02725	-0.0863529	-0.461497
nuoJ	-0.00550491	0.884802
CCNA_02721	0.0184212	0.0725776
CCNA_02720	0.0733352	-0.267928
CCNA_03636	0.0193018	0.197479
CCNA_03637	0.0459406	0.768495
rsaFa	-0.0460184	0.78737
rsaFb	0.0137154	-0.002453
corC	0.0168744	0.4595
nuoN	-0.0485765	-0.0927548
ileS	0.00040713	-0.134294
CCNA_02347	-0.0111626	0.706147
CCNA_02658	-0.0147883	0.112081
CCNA_02657	#NAME?	0.190762
CCNA_02434	0.237603	0.0339884
CCNA_00817	0.171649	-0.718036
CCNA_00810	-0.0433586	-0.035446
CCNA_02457	0.132658	-0.250463
CCNA_02881	0.181919	-0.0767531
CCNA_00257	0.018927	-0.0363775
CCNA_02889	0.184002	-0.0377609
CCNA_00255	-0.0291589	-0.441986
CCNA_00253	0.225501	0.01932
CCNA_00496	0.0901371	-0.0801607
CCNA_01449	-0.0986981	0.274987
CCNA_01444	0.00350229	-0.54831
CCNA_01447	0.147574	0.345976
CCNA_01446	-0.0624048	0.523278
CCNA_01441	-0.108037	0.262345
CCNA_01440	-0.0234654	-0.149013
CCNA_01442	-0.0549938	0.506726
CCNA_01285	#NAME?	0.864289
ccoP	-0.57353	-0.339779
CCNA_00006	0.0143826	-0.272014
CCNA_00007	0.129608	1.2239
CCNA_00004	-0.140267	-0.546779
CCNA_00001	-0.0430422	-0.0998643
CCNA_03752	0.00322993	-0.328613
CCNA_03751	0.0766217	-0.218915
CCNA_03750	0.0557764	-0.341482
CCNA_03284	-0.0567249	-0.0648966
CCNA_03281	-0.0536308	0.5068
CCNA_03355	0.131019	1.03403
CCNA_03353	-0.104129	-0.433876
CCNA_03352	0.0960722	0.768822
CCNA_03351	-0.0552397	-0.0220897
CCNA_01668	#NAME?	-0.088674
CCNA_03359	0.093246	-0.247249
CCNA_03358	0.073994	0.323043
CCNA_02405	-0.111174	0.517458
cysI	0.20074	0.0914143
cysH	0.305282	0.192646
CCNA_03137	#NAME?	-0.656189
ribH	0.0171324	-0.11559
CCNA_02535	0.0552425	-0.383824
CCNA_00620	0.00269601	-0.350514
CCNA_02537	0.0762575	0.0528988
CCNA_02539	-0.0861123	0.394626
CCNA_01843	1.54697	0.543508
CCNA_02247	#NAME?	0.585648
CCNA_02244	-0.0345566	-0.44452
CCNA_02243	#NAME?	0.0691432
CCNA_02716	-0.0624669	-0.192503
CCNA_02241	-0.0559234	0.111293
CCNA_02088	#NAME?	0.850469
CCNA_03627	0.0497654	-0.424497
CCNA_03626	0.146217	0.503937
CCNA_02082	0.0932577	0.639278
CCNA_03628	0.0444913	-0.364116
CCNA_02085	0.045235	-0.10331
CCNA_02087	0.0455039	-0.242566
CCNA_03711	-0.0724352	0.377192
lovK	-0.00810374	-0.372357
CCNA_00539	-0.00554869	-0.050204
ybgF	0.141567	-0.0920073
CCNA_00530	0.0760071	-0.372939
CCNA_00531	0.0469192	1.36145
CCNA_00536	0.0758501	-0.0728768
CCNA_00537	0.00633356	0.295087
CCNA_00534	0.107256	-0.179824
yihA	-0.126649	-0.375995
CCNA_02669	-0.0656848	1.30357
CCNA_02661	-0.0129633	0.622707
CCNA_02662	0.0181387	0.214268
CCNA_02458	0.0350294	-0.141037
dxs	0.0247549	0.108539
purH	0.0835571	-0.1375
CCNA_00398	-0.0444575	-0.150688
CCNA_00399	-0.215003	-0.121306
CCNA_00820	#NAME?	0.239982
CCNA_00397	-0.0409453	-0.630715
CCNA_00392	0.02789	0.675358
CCNA_00390	0.149765	1.02298
CCNA_01062	0.0286358	-0.62177
divL	0.252251	-0.66322
CCNA_01066	0.0284802	-0.111823
CCNA_01065	-0.162584	-0.152772
CCNA_01064	0.0631003	0.775713
CCNA_01069	0.189187	-0.110782
spoT	0.112604	0.379071
sucD	0.0686546	1.95265
tonB1	-0.085116	1.49072
CCNA_02897	0.182758	0.717322
CCNA_02896	0.022018	-0.414995
CCNA_02895	-0.0295129	-0.164027
CCNA_02893	-0.0988868	-0.542266
CCNA_02891	0.0218581	-0.6432
CCNA_00843	-0.178623	-0.381076
uvrD	-0.0021941	-0.665417
CCNA_02898	#NAME?	0.0252854
flbD	0.0472051	0.296063
flbA	0.107098	-0.277196
CCNA_01479	0.434303	-0.376338
CCNA_01274	0.0731466	-0.146596
CCNA_01275	-0.0425666	-0.0575897
CCNA_01387	0.0487724	-0.300266
CCNA_01384	-0.132672	-0.264022
CCNA_01382	-0.06007	0.0818326
CCNA_01381	0.0495989	0.137245
CCNA_03729	0.0385241	-0.608677
CCNA_03726	-0.0139311	-0.115359
CCNA_01658	-0.383227	-0.152549
CCNA_00700	-0.0226853	-0.426206
CCNA_01650	0.0838862	-0.49059
CCNA_01651	-0.0719639	0.152404
CCNA_01653	0.102456	-0.0852426
CCNA_01654	0.190286	0.056102
CCNA_01655	-0.0606212	-0.0165263
argJ	0.0463064	-0.134923
pleD	-0.14358	0.0624957
hfaB	0.140356	0.0668419
CCNA_01492	-0.169979	0.0907591
CCNA_01493	0.190666	0.22477
CCNA_01490	-0.0623534	-0.399563
CCNA_01491	-0.0278166	-0.345171
CCNA_01496	-0.111274	0.800582
CCNA_01497	0.0190238	-0.328987
gidA	0.144372	-0.363584
CCNA_03432	0.126531	0.0648089
CCNA_03431	0.134544	0.255017
CCNA_03435	0.218046	-0.238529
CCNA_03384	0.182703	0.419099
CCNA_03382	0.0840859	-0.269976
CCNA_03383	-0.00163422	-0.26976
CCNA_00635	0.467246	0.135208
CCNA_02526	0.0154497	-0.117734
CCNA_00636	0.229519	-0.21607
CCNA_01728	-0.00206316	-0.466809
CCNA_01724	-0.121194	0.499161
CCNA_01726	0.00827816	0.184495
CCNA_02528	-0.185874	-0.32454
smpB	#NAME?	0.649099
serS	0.0621866	0.727022
CCNA_02709	-0.10463	0.123926
CCNA_02254	0.448695	-0.0664323
CCNA_02704	0.026938	0.331249
CCNA_02251	0.02161	1.66538
CCNA_02250	0.113828	-0.125929
CCNA_02252	-0.123709	0.267016
CCNA_03656	0.293799	-0.106126
CCNA_03657	-0.0376889	-0.235137
CCNA_03653	0.107826	0.445547
CCNA_02098	0.011075	-0.346416
CCNA_02095	-0.16534	-0.13081
CCNA_02094	0.0208163	0.666974
CCNA_02093	0.477135	-0.112642
CCNA_03658	0.0255115	-0.0329851
CCNA_02090	-0.14129	0.213645
CCNA_02413	-0.0267914	0.455248
CCNA_00520	0.0241355	-0.223872
CCNA_00523	-0.222826	0.461708
ppx1	-0.102087	-0.0413163
CCNA_02673	-0.231621	-0.252427
CCNA_02380	-0.0829352	0.336191
CCNA_02387	0.121588	-0.307046
CCNA_02385	0.0202986	0.649241
CCNA_02384	-0.0353172	-0.0423649
CCNA_02389	0.019296	-0.19406
CCNA_02388	-0.187511	-0.463606
grpE	-0.141824	0.291867
CCNA_01750	0.103105	-0.249709
gyrB	0.0328279	0.415094
CCNA_03938	-0.111939	-0.394102
qor	-0.0958645	-0.0549367
CCNA_00839	0.0776766	-0.50984
CCNA_00831	-0.0723796	-0.0840498
CCNA_00830	-0.00695333	-0.450847
CCNA_01019	-0.286943	-0.416445
leuD	-0.123538	-0.207471
leuB	0.0185953	0.265066
leuC	0.0703399	-0.0801894
CCNA_01122	0.14199	-0.0199463
dksA	-0.0996228	0.645522
CCNA_02042	-0.0296321	0.277475
CCNA_01463	0.0634293	-0.281652
mopB	-0.0280637	-0.319009
CCNA_01261	-0.156969	-0.0203627
CCNA_01268	-0.124203	0.876748
CCNA_00021	0.14079	0.243799
CCNA_00024	-0.0274605	0.680512
CCNA_00025	0.198152	-0.14852
CCNA_00027	-0.22299	-0.0704359
CCNA_00028	-0.15448	-0.37824
lpxI	0.150519	0.641599
lpxA	0.228085	0.314898
lpxB	#NAME?	0.457927
lpxD	0.168602	0.158821
CCNA_01396	-0.0563669	-0.198061
CCNA_02849	-0.429031	0.0425661
CCNA_02845	-0.0223562	0.0924664
CCNA_01399	#NAME?	-0.263025
CCNA_02842	0.121421	-0.233561
CCNA_03735	0.00215766	0.0903138
CCNA_03733	-1.21473	-0.208221
CCNA_03732	0.0588672	0.295418
acrB	0.153352	0.470648
CCNA_00734	-0.136921	-0.181561
CCNA_00732	0.177514	0.290772
CCNA_01648	0.00702155	-0.0200779
CCNA_01645	0.0614378	0.775999
CCNA_01640	0.0113537	-0.170581
CCNA_01480	-0.147302	1.04477
CCNA_03421	0.182388	-0.0378531
CCNA_03422	-0.0579549	0.14518
CCNA_03396	0.132551	-0.402491
nusG	-0.171635	0.529314
nusB	0.161193	-0.161633
nusA	0.0381768	0.569164
CCNA_01733	-0.131477	0.0398321
CCNA_01730	0.06907	-0.403495
CCNA_01737	0.132214	0.701662
CCNA_01739	-0.118303	-0.264476
CCNA_01738	0.294637	0.202395
CCNA_02062	0.138414	-0.146799
CCNA_03641	0.0359591	1.08558
CCNA_03640	0.19815	0.156499
CCNA_03643	0.288271	0.542598
CCNA_03642	0.144043	0.341751
CCNA_02069	-0.141193	-0.263601
CCNA_03649	-0.0298981	0.116095
yidC	0.0455941	0.33568
ctrA	0.109203	0.413342
CCNA_00518	-0.125767	-0.283998
CCNA_00519	0.420074	0.302111
CCNA_02466	#NAME?	-0.134086
CCNA_00515	0.0589979	1.53024
CCNA_02464	-0.019432	-0.121539
CCNA_02465	-0.350639	-0.42831
pal	0.0651882	0.865562
CCNA_00512	0.0289629	0.078909
CCNA_02607	0.0148397	0.342412
CCNA_02604	-0.556776	-0.262761
CCNA_02605	-0.087075	-0.0363589
ppk1	0.197205	0.27171
CCNA_02600	-0.109522	0.247193
CCNA_02601	-0.0699032	-0.301546
CCNA_02608	#NAME?	-0.644404
CCNA_02741	0.358892	0.783672
CCNA_02112	0.0314536	-0.0925945
spmX	#NAME?	0.140109
CCNA_01008	-0.128503	-0.0685523
CCNA_00285	0.0468641	0.0553288
CCNA_00281	-0.0452438	0.735948
CCNA_00283	0.0289663	-0.395864
CCNA_00288	0.013813	0.236135
CCNA_01139	-0.054674	-0.0911084
fzeB	0.301512	-0.814374
fzeA	0.0998912	0.152484
cydA	0.267632	0.529099
CCNA_01804	0.030674	0.106277
CCNA_00358	0.081519	-0.306015
CCNA_00359	-0.146102	-0.386047
CCNA_01252	-0.0340703	0.484339
CCNA_00352	0.312987	0.0588431
CCNA_00733	0.188833	-0.584125
CCNA_01259	-0.14174	2.46884
srp	0.126973	-0.460698
CCNA_02693	-0.124722	0.401076
ftsX	0.365875	-0.353222
CCNA_02923	-0.054522	0.10531
CCNA_00035	0.134951	-0.008535
CCNA_00034	0.141616	0.990518
CCNA_00033	-0.0118854	0.0579817
CCNA_00256	-0.0945295	-0.423304
lon	0.0343398	0.660121
CCNA_02854	0.0306958	0.311321
CCNA_03702	-0.0107078	0.064912
CCNA_03704	0.0023847	-0.0451752
CCNA_03705	0.0849467	0.977384
CCNA_03706	0.239324	-0.120112
CCNA_00722	-0.0280637	-0.375028
CCNA_00721	-0.0145984	-0.159628
CCNA_00720	-0.170324	-0.090616
CCNA_00726	0.183474	-0.237226
CCNA_01989	-0.0461834	0.500175
CCNA_03414	0.0453141	0.40197
CCNA_03412	0.079644	0.335676
CCNA_02545	0.0180751	0.35734
CCNA_02011	0.0555402	1.40378
CCNA_00618	0.206048	0.345599
CCNA_00611	-0.15599	1.08944
CCNA_00610	0.196547	0.466381
CCNA_01746	0.0925182	-0.374941
CCNA_01747	0.0631408	0.182378
CCNA_01745	0.171351	0.0325028
CCNA_03094	0.191926	0.344067
CCNA_01740	-0.0961659	0.0254328
CCNA_03097	0.169299	-0.358047
CCNA_03098	0.220479	0.001493
CCNA_03808	-0.0149294	0.748106
CCNA_01749	0.196765	1.06009
CCNA_02277	-0.513996	-0.633136
CCNA_02275	-0.388743	-0.116544
CCNA_03545	-0.259027	0.346531
CCNA_02273	-0.105266	1.23038
CCNA_03672	0.0582148	1.6231
CCNA_03674	-0.0439456	0.299056
CCNA_03675	0.101348	0.0967412
CCNA_03677	#NAME?	-0.572065
CCNA_02071	#NAME?	0.798371
CCNA_02070	-0.0410541	-0.435701
CCNA_02077	0.0780264	0.126337
lysS	0.0605757	0.408384
CCNA_03076	0.321259	-0.316259
phyR	-0.0596757	0.0964395
CCNA_03392	-0.0118058	0.112327
CCNA_00507	-0.107103	0.347555
CCNA_00506	0.122658	0.631476
CCNA_00505	-0.198259	-0.235908
CCNA_00504	-0.00968745	0.77244
CCNA_01923	0.0742312	1.01449
CCNA_01927	-0.0581635	0.269321
CCNA_01925	0.183469	-0.351406
CCNA_02614	-0.105341	-0.153755
CCNA_02617	0.117216	-0.0829615
CCNA_02612	0.0700114	0.564391
CCNA_02619	0.0189407	0.564375
CCNA_01818	0.12587	0.0589798
CCNA_01812	-0.0268598	-0.122884
atpA	0.00368399	0.184811
hemH	-0.114246	-0.598958
hemN	#NAME?	0.0137102
CCNA_02293	0.00341343	-0.847581
CCNA_02294	0.0342895	-0.579178
CCNA_02297	#NAME?	-0.250369
CCNA_02296	0.0892562	-0.337984
CCNA_00601	0.150459	0.605858
CCNA_01030	-0.353139	0.206042
CCNA_01031	-0.0825959	0.350475
CCNA_01034	0.670535	-0.0845587
CCNA_01036	0.32419	-0.0306376
trmE	-0.112461	0.114091
CCNA_00299	0.0513278	-0.38535
CCNA_00290	-0.0413637	0.259791
CCNA_01109	-0.0114116	-0.0953967
CCNA_01100	1.31828	-0.209938
CCNA_01101	-0.110615	1.99657
CCNA_01103	-0.0139857	0.569791
CCNA_02261	0.100394	0.125224
CCNA_01369	-0.0453994	-0.141406
CCNA_01242	-0.119801	0.158145
CCNA_01240	#NAME?	0.681787
CCNA_01245	-0.0629216	0.806884
CCNA_02912	-0.181255	0.0573834
CCNA_02913	-0.23274	-0.50637
CCNA_02914	0.0873165	-0.423126
CCNA_02915	0.110866	-0.280369
CCNA_00340	0.0094481	0.381481
CCNA_00346	-0.0135586	0.134588
cckA	0.197444	-0.009772
CCNA_03717	0.129293	0.0326215
CCNA_03715	-0.0792164	-0.313011
CCNA_03714	-0.0863945	0.62036
CCNA_03245	-0.0203613	-0.638527
CCNA_03247	-0.0250536	0.475731
CCNA_03248	0.0745894	0.0398734
CCNA_02065	-0.109485	0.85514
CCNA_03718	0.000928645	0.125316
CCNA_00758	-0.0842178	0.0825497
CCNA_00752	0.123548	0.212532
CCNA_00199	0.160148	-0.117533
CCNA_00192	-0.198972	0.0530366
CCNA_00194	#NAME?	-0.483808
CCNA_03408	0.174281	-0.207304
CCNA_03402	0.221933	-0.33925
CCNA_03401	-0.0685766	-0.612251
CCNA_03407	-0.0662674	0.294785
secY	-0.118655	1.18667
CCNA_01757	0.0909042	0.0290861
CCNA_01751	-0.165528	-0.157816
CCNA_01752	0.138308	-0.118242
CCNA_01759	0.0208442	0.570945
CCNA_03089	#NAME?	0.774011
CCNA_03665	-0.0279789	-0.220128
CCNA_03664	0.0992415	-0.603682
CCNA_03663	0.152825	-0.021293
CCNA_02596	-0.0134476	-0.118896
ccoO	-0.544326	-0.34335
CCNA_02040	-0.1099	-0.671866
CCNA_02590	-0.11342	-0.0114661
CCNA_03060	#NAME?	0.158366
CCNA_03063	0.322554	-0.0560327
CCNA_02048	0.114968	1.00508
CCNA_02443	-0.0217439	-0.28142
CCNA_02446	-0.0116981	-0.107908
CCNA_02447	-0.0761406	-0.335392
CCNA_02448	-0.0077	0.248323
CCNA_00579	-0.0238133	1.25907
CCNA_02628	0.111373	0.023872
CCNA_02629	0.076431	-0.373615
CCNA_01936	0.103168	0.197562
CCNA_02622	0.0897985	0.15899
CCNA_02626	-0.0547299	0.468658
CCNA_02627	0.00778626	-0.354594
CCNA_00511	0.117131	0.45908
CCNA_01809	0.206704	0.202738
CCNA_01805	0.0747664	0.491849
CCNA_00403	0.276355	0.0842806
CCNA_01807	-0.0719723	-0.0596932
CCNA_01800	0.0351697	0.586846
CCNA_01803	0.0245944	-0.310763
CCNA_00405	-0.0143119	-0.270448
dapA	0.0185017	-0.168007
lolD	-0.0347526	0.399617
CCNA_02130	0.0689151	-0.266685
CCNA_01028	0.0109921	0.0110991
CCNA_01026	0.0254331	0.818422
CCNA_01020	-0.081934	-0.234535
CCNA_03874	0.0470124	-0.547579
recA	0.012647	-0.336111
recF	0.235839	-0.211848
CCNA_00993	#NAME?	-0.347752
CCNA_00995	0.0125161	-0.215042
CCNA_00998	0.0778184	-0.0436733
cheBII	0.0439453	-0.205647
moaB	0.150977	0.125791
CCNA_00973	0.0101238	1.0164
CCNA_00970	-0.0355257	0.294508
CCNA_00971	-0.0186494	-0.596735
CCNA_00974	0.142274	-0.0285436
CCNA_01110	0.0813078	0.00423
greA	-0.178673	0.927067
ubiB	#NAME?	-0.242486
CCNA_01233	0.211883	0.0759882
CCNA_02900	0.23989	-0.002525
CCNA_02903	#NAME?	-0.565476
CCNA_02902	-0.00766763	0.307018
parB	-0.0573801	-0.0159065
parA	0.0325297	-0.0410207
CCNA_00370	0.109263	-0.609831
CCNA_00371	0.109263	-0.34509
CCNA_00373	#NAME?	0.633511
miaA	-0.0969129	0.201489
CCNA_01583	-0.168964	-0.205772
CCNA_01585	-0.0689202	-0.160078
CCNA_01586	-0.0791169	0.27283
CCNA_01587	0.00756742	0.319662
CCNA_01588	0.0370088	-0.0263802
ptrB	0.107675	0.252399
CCNA_01341	-0.048048	0.177372
CCNA_01347	-0.357371	0.086534
CCNA_02831	0.14671	1.35725
CCNA_02832	0.00520806	-0.158397
CCNA_03279	0.333374	-0.623145
CCNA_00749	-0.10494	-0.219539
rho	0.0198773	-0.315364
CCNA_00740	0.0594054	-0.254128
CCNA_00742	0.0861123	-0.0480356
CCNA_01695	0.207706	-0.174736
CCNA_01691	0.170458	-0.384938
CCNA_01692	0.0910402	0.175887
CCNA_00188	0.0245071	-0.228752
CCNA_00185	0.174175	0.148068
CCNA_01698	0.0330944	-0.0218901
acrB3	-0.135957	-0.0117347
CCNA_03475	-0.0198835	-0.133377
CCNA_03471	0.110662	0.137532
clpX	-0.0109233	0.115946
CCNA_01760	0.131336	0.0975525
clpP	-0.0737954	0.0326283
CCNA_01762	#NAME?	0.278475
CCNA_01763	0.0109921	-0.191116
sspB	-0.153687	0.575547
CCNA_01766	0.0290695	0.454451
chpT	-0.0523607	0.204914
clpA	0.157862	0.164972
CCNA_01563	-0.0200885	0.23929
CCNA_01560	0.0729917	-0.300106
clpB	0.0552206	0.020465
odhA	0.0126917	0.363104
CCNA_01567	0.0822513	-0.407288
odhB	0.0155945	-0.223187
CCNA_03693	-0.133683	-0.326359
CCNA_02059	0.0531958	0.0674209
CCNA_03696	-0.0822674	-0.132167
CCNA_03695	-0.399706	-0.824891
CCNA_02052	0.0818866	-0.432948
CCNA_02051	0.929202	0.301169
CCNA_02050	1.30445	0.368473
CCNA_02054	0.00883083	-0.0826553
CCNA_03502	-0.234901	-0.0189343
CCNA_03503	-0.1577	-0.502125
CCNA_03500	0.0796438	-0.462489
CCNA_02586	0.0188414	-0.191678
CCNA_03504	0.0266548	-0.826236
CCNA_03505	-0.0540808	0.119078
CCNA_03050	0.0952199	-0.742409
CCNA_02588	-0.0540107	0.482678
CCNA_00379	0.0899991	0.318873
CCNA_00565	0.0379985	-0.452192
CCNA_00562	-0.481023	-0.0285673
CCNA_03184	0.558309	-0.240064
CCNA_03185	0.177677	-0.00631
CCNA_03183	0.330109	0.205401
CCNA_02459	0.314315	-0.268468
CCNA_03181	0.630291	0.193751
cheAI	0.307689	-0.262119
CCNA_02401	-0.141216	-0.251084
CCNA_00413	-0.0857215	0.24421
gmk	-0.0739172	-0.438591
CCNA_02127	#NAME?	0.30909
chlI	0.0487698	-0.0909536
CCNA_03522	0.0727705	-0.270587
rpoD	0.0174674	1.896
sppA	0.0195388	-0.380647
CCNA_03864	0.0996877	0.434141
CCNA_00989	0.721441	0.373392
CCNA_00968	-0.0171827	-0.11204
CCNA_00966	-0.16516	-0.0744645
CCNA_01164	0.275112	0.0247217
CCNA_01165	0.179903	0.039088
CCNA_01162	0.111061	-0.197224
dgcB	-0.109026	0.15705
CCNA_01226	-0.231107	1.08969
CCNA_01220	0.221802	0.822915
CCNA_01223	0.0454886	0.206053
CCNA_00361	0.224367	-0.381165
CCNA_00367	-0.136804	0.0666068
CCNA_00366	-0.106953	-0.782119
CCNA_02933	0.0857052	-0.411744
CCNA_01594	-0.068963	-0.162092
CCNA_01593	0.0388562	2.00622
CCNA_01353	0.313506	-0.578571
CCNA_01352	-0.08226	-0.103558
mipZ	0.0924358	0.110171
flgE	0.111009	0.146875
CCNA_01689	0.0108053	-0.182274
CCNA_00773	0.159126	-0.045796
CCNA_00774	#NAME?	-0.555809
CCNA_00778	0.00178967	0.0154929
CCNA_01687	0.292563	-0.241921
mreB	-0.157895	0.649373
mreC	0.0936883	-0.13843
divJ	0.136923	-0.0807681
CCNA_03469	-0.0243277	0.41625
CCNA_02242	0.443973	-0.0518306
CCNA_03467	0.0902167	-0.331161
CCNA_03463	-0.158643	-0.36737
CCNA_03462	#NAME?	-0.324582
CCNA_02240	0.148626	-0.150708
CCNA_01776	0.0248751	0.425969
CCNA_01775	0.0422766	-0.272458
rpsU	-0.0541463	0.476136
CCNA_01770	-0.169503	0.006676
CCNA_01579	0.183003	0.134126
nuoC	-0.0415994	0.002557
nuoF	0.00517556	-0.176812
CCNA_00083	-0.179668	-0.389757
nuoD	0.0516161	0.71792
nuoE	0.022271	-0.47053
CCNA_03263	-0.448455	0.651186
CCNA_02325	0.0308172	-0.007919
nuoI	0.0845156	-0.0583459
CCNA_01575	0.177572	0.102816
CCNA_03265	0.419204	0.281494
CCNA_03680	0.199365	0.267476
CCNA_03683	0.0122023	-0.615081
CCNA_03682	0.0759444	0.375659
CCNA_03684	0.315294	0.009569
CCNA_03686	-0.0352693	-0.350383
CCNA_03689	-0.400125	0.0963904
CCNA_03510	-0.0246007	-0.0348127
bacB	-0.0889308	-0.0732468
bacA	0.0739581	1.35838
CCNA_00553	0.107301	-0.074715
CCNA_02332	0.0429395	-0.563093
CCNA_02333	#NAME?	-0.170754
CCNA_02337	0.0531905	0.898035
CCNA_02335	0.168893	0.847977
CCNA_02338	-0.0935183	0.157389
CCNA_02339	#NAME?	0.0137509
pbpX	-0.0820608	0.0545945
pbpY	0.647107	-0.332823
CCNA_01826	0.0373799	0.200331
CCNA_01820	-0.0944057	-0.430042
lexA	-0.0750115	0.26811
CCNA_02150	-0.00881417	0.0892072
CCNA_01919	-0.0419871	0.444505
CCNA_01917	0.0338922	0.0628969
CCNA_01914	0.032254	-0.304205
ihfB	-0.203413	-0.45868
CCNA_03856	0.19186	-0.163091
CCNA_03852	-0.0934466	-0.0544137
CCNA_03853	0.00937889	0.24333
CCNA_03858	-0.0697006	0.686635
dipM	0.0443507	0.38104
CCNA_01174	0.119862	0.406987
CCNA_01176	-0.214136	-0.137637
CCNA_01172	0.0752561	-0.0930547
CCNA_01178	0.048344	0.745676
CCNA_00857	0.0466409	0.326768
CCNA_00889	-0.200848	0.016601
CCNA_00886	-0.0231264	0.977036
CCNA_01210	-0.115394	0.108309
CCNA_01211	#NAME?	-0.579502
CCNA_01212	-0.182481	-0.05317
CCNA_01217	-0.0141645	-0.120799
CCNA_01218	-0.223525	1.34046
CCNA_02925	0.195718	0.553237
CCNA_00315	0.00321934	-0.547252
CCNA_00313	0.10727	0.199345
CCNA_00311	0.0143465	0.326457
glpX	-0.0823039	1.7437
glpK	0.00435435	-0.146634
edd	0.0445275	-0.080046
fljL	-0.31067	0.108532
fljM	-0.0355499	0.0213256
fljN	0.00319653	0.383261
fljK	0.163486	1.50861
CCNA_01364	#NAME?	-0.669448
CCNA_01367	0.523179	-0.0113348
CCNA_00222	0.12984	-0.270801
CCNA_00220	-0.0589002	-0.201524
CCNA_01368	-0.0216822	-0.0166272
CCNA_00224	0.249134	-0.261085
CCNA_00764	0.0237009	0.320603
CCNA_00763	0.23003	-0.550105
CCNA_00769	#NAME?	0.316435
cgtA	-0.0804135	-0.509525
CCNA_00163	-0.610805	0.603211
CCNA_00162	-1.34068	-0.0695921
CCNA_00164	-0.523619	0.0484413
CCNA_03770	0.0414458	0.209176
CCNA_00168	-0.274589	1.15333
CCNA_03322	0.106294	-0.174163
CCNA_03323	0.0545407	0.311831
CCNA_03455	-0.0403066	-0.399918
CCNA_00095	0.0309312	-0.180951
CCNA_01549	0.146776	0.161238
CCNA_00092	#NAME?	-0.882372
CCNA_01546	0.102008	-0.0757884
CCNA_01547	0.0511721	-0.341955
CCNA_01769	0.38636	0.297086
CCNA_02036	0.169054	-0.540142
rpoA	0.0110437	1.78528
CCNA_03527	0.196692	-0.0237881
CCNA_03032	-0.107572	0.5396
CCNA_03521	0.247119	-0.0665084
CCNA_03030	-0.0787079	0.0278015
rpoH	-0.095603	1.249
CCNA_00545	0.0248089	-0.595266
CCNA_00544	0.128927	0.206455
CCNA_00540	-0.186091	-0.451361
CCNA_00784	-0.560976	0.164058
rpsE	-0.160504	0.0238589
rpsC	0.0571131	-0.0204099
rpsN	-0.0273552	0.845474
rpsM	-0.0419262	-0.0129821
rpsK	-0.0730909	2.01111
rpsJ	-0.233251	0.218248
rpsH	-0.102387	-0.397006
CCNA_02321	-0.0223177	-0.437204
CCNA_02320	0.155056	0.0493405
CCNA_03148	0.0648511	-0.440875
CCNA_03149	0.189597	0.935028
rpsS	0.154845	0.525317
rpsQ	-0.0791808	0.0837183
CCNA_02326	0.00269601	0.117968
CCNA_03143	#NAME?	0.363229
CCNA_03146	0.189688	0.0580237
CCNA_00439	0.153679	0.381742
phoR	-0.140177	-0.0992008
CCNA_01562	-0.138265	-0.003057
phoB	#NAME?	-0.199437
thiC	0.10493	-0.110089
phoH	-0.104718	-0.217519
thiG	0.0422131	0.520324
CCNA_01969	-0.0219466	0.0494752
CCNA_01964	-0.177061	-0.144955
CCNA_01960	-0.0802482	1.19933
CCNA_01961	0.143389	0.23632
CCNA_00357	-0.0714436	0.307152
CCNA_03849	0.0195574	-0.0978425
CCNA_03848	0.0886972	0.157087
CCNA_03844	0.255095	-0.0835511
CCNA_03699	0.100531	2.27319
CCNA_01143	0.1926	0.207934
CCNA_00899	-0.118285	0.388547
CCNA_00898	0.172925	0.628939
CCNA_00895	-0.113819	-0.637611
CCNA_00893	0.220895	1.25043
CCNA_02583	-0.0230168	-0.538909
CCNA_01204	0.0629904	0.247833
CCNA_01203	0.12421	-0.134253
CCNA_01202	0.18874	-0.147187
ruvB	0.291037	-0.12043
CCNA_00301	#NAME?	-0.104538
CCNA_00309	#NAME?	1.01485
mutS	0.0991254	0.218241
CCNA_01378	-0.0187584	0.206259
CCNA_01372	0.058267	-0.0634831
CCNA_01375	0.0356601	-0.259451
CCNA_00230	0.177544	-0.274786
CCNA_00233	0.120711	-0.423388
nadE	-0.0189231	-0.197107
rplX	-0.000343545	0.080371
rplV	0.0027272	-0.633927
rplW	-0.120646	-0.422176
rplR	0.0238844	-0.173956
rplS	-0.0920384	1.95897
rplP	-0.0268124	-0.692787
rplQ	-0.145909	0.553785
rplN	0.0142105	0.230803
rplO	-0.0978482	0.233454
rplF	-0.139263	-0.183817
rplD	-0.0721329	-0.280275
rplE	-0.175152	0.244486
rplB	0.00136354	-0.347044
rplC	0.0474381	-0.329525
CCNA_00155	-0.0410575	-0.007276
CCNA_00151	-0.0389738	0.194493
CCNA_00152	#NAME?	-0.001669
metK	0.0629481	0.465328
CCNA_03445	#NAME?	-0.359339
CCNA_03444	-0.181997	0.0391077
fzlC	0.172956	0.218826
CCNA_01791	0.101692	-0.327843
CCNA_01792	-0.0138605	-0.270459
CCNA_01795	-0.0493513	-0.19223
CCNA_01799	-0.04194	-0.187205
CCNA_01550	0.10087	0.372204
CCNA_01556	-0.0041337	0.256565
CCNA_01554	#NAME?	-0.148331
CCNA_03205	0.0320774	-0.136551
CCNA_03204	-0.0117293	-0.412537
CCNA_03207	0.10125	0.492898
CCNA_03206	0.0519952	0.069013
CCNA_03201	0.0440788	0.650882
CCNA_03203	-0.0600959	-0.0499531
CCNA_03202	0.0150126	0.445082
CCNA_02000	0.0366154	0.96999
CCNA_02006	-0.0347526	-0.255508
CCNA_02555	#NAME?	0.002069
CCNA_02008	-0.025341	0.411994
CCNA_03531	0.32284	-0.006389
CCNA_03024	0.0328043	0.599985
CCNA_03023	-0.120558	-0.003686
CCNA_03022	#NAME?	-0.25409
CCNA_03029	0.0378927	-0.301844
CCNA_03028	0.0315715	-0.062532
bamD	-0.028555	0.356896
bamE	0.0591128	0.622675
bamF	0.224705	0.454967
bamA	-0.0017534	0.553052
bamB	-0.0148965	0.884595
xylX	-0.0252957	-0.111567
xylR	-0.0703715	0.0406239
CCNA_03159	-0.245453	0.601661
CCNA_02312	0.232152	0.092691
CCNA_03151	0.0590593	-0.0893424
xylC	0.0207198	0.346303
xylB	-0.0225093	1.04129
CCNA_03155	-0.243219	0.0777204
xylD	-0.031402	-0.511427
CCNA_03157	-0.0919448	0.278905
CCNA_03156	-0.274459	-0.154452
CCNA_03609	-0.182076	-0.676169
CCNA_02225	-0.260171	-0.0336336
dnaX	0.0266727	-0.575384
dnaA	0.389784	-0.311814
CCNA_00445	0.0439453	0.268091
dnaK	-0.00196874	2.3556
dnaJ	0.0226185	0.412356
CCNA_02733	0.0933469	0.723121
CCNA_02178	0.0759376	0.0156777
CCNA_02179	-0.330755	0.387338
CCNA_02172	#NAME?	1.13807
CCNA_02173	0.402365	-0.477348
CCNA_02174	0.274963	0.177453
CCNA_02779	0.0896108	0.527645
CCNA_03256	-0.0599235	0.0706577
CCNA_02738	0.0461223	-0.630457
trpS	-0.0324108	-0.284242
CCNA_01976	0.1989	-0.305271
CCNA_01971	0.026946	-0.373401
CCNA_01970	0.102503	-0.332992
CCNA_01972	0.0572662	-0.368867
rfaE	-0.0881788	-0.47157
CCNA_03838	0.172635	-0.001949
CCNA_03839	0.623533	0.0608346
CCNA_03836	-0.106829	0.832073
CCNA_03835	0.648901	0.333473
CCNA_03830	0.00105777	0.42663
pstC	#NAME?	0.098712
pstB	0.00863159	0.860848
CCNA_00933	0.0684622	0.0723911
CCNA_00931	0.143579	0.0207329
CCNA_01155	0.0356706	0.345114
CCNA_00938	-0.344546	-0.365453
nagA	0.230192	-0.347296
CCNA_00338	0.113112	-0.0676998
CCNA_00849	-0.0644255	-0.432622
CCNA_00331	-0.031861	0.277731
CCNA_00846	-0.0177401	-0.196356
hetN	#NAME?	-0.332882
CCNA_01535	-0.148973	0.835782
CCNA_00206	0.0437787	-0.522429
CCNA_00200	-0.0235031	0.0202336
CCNA_00201	-0.27428	-0.0323961
gltD	0.101178	-0.557914
CCNA_01533	-0.611189	-0.43543
CCNA_00140	0.105756	-0.156619
CCNA_00146	-0.171958	0.479372
CCNA_00145	-0.229935	-0.0231391
CCNA_01412	-0.210982	-0.158262
CCNA_01416	-0.0831759	-0.66016
CCNA_01417	0.0731273	-0.301535
CCNA_01415	0.0773123	0.0443432
CCNA_01418	-0.429715	0.274423
CCNA_01419	0.14258	-0.174295
CCNA_03304	0.00768218	0.48067
CCNA_03305	-0.160385	0.493503
CCNA_03306	-0.0259258	1.01689
CCNA_03300	0.0182214	-0.21519
cenR	#NAME?	0.395817
CCNA_03309	0.0590871	-0.441593
CCNA_02944	-0.0190161	0.240808
CCNA_01998	-0.0811444	0.498373
CCNA_03009	-0.029821	-0.131874
CCNA_02573	-0.158935	-0.225125
CCNA_03233	-0.0314759	-0.412529
CCNA_01522	0.02789	0.298391
CCNA_03235	#NAME?	0.265657
CCNA_01520	-0.542318	0.7037
CCNA_01521	0.31096	-0.794916
CCNA_03239	0.0703996	-0.141641
CCNA_02540	0.361452	1.57402
CCNA_02543	-0.0783932	0.7834
CCNA_02013	0.000498078	-0.462117
CCNA_02012	0.0958803	-0.113879
CCNA_03548	-0.0768209	0.298559
CCNA_02549	0.181199	-0.295803
CCNA_03012	-0.0848293	0.523272
CCNA_03543	0.026478	1.02364
CCNA_03541	-0.15582	0.490634
CCNA_03780	-0.191916	-0.320418
rpmC	0.299596	-0.28769
coxB	0.0430075	0.153986
coxA	-0.0329335	0.242877
CCNA_01636	0.0593673	-0.227303
CCNA_01637	0.0316951	0.353683
CCNA_02307	0.0900817	-0.121542
CCNA_02306	0.117216	-0.638697
CCNA_02305	-0.00109701	-0.419172
CCNA_02304	-0.211518	-0.457254
CCNA_03164	0.00750146	0.225589
fabI	0.0436049	-0.68585
CCNA_03163	-0.00361294	-0.404107
CCNA_03495	0.39197	-0.170839
CCNA_03496	0.223804	0.737599
CCNA_00457	0.111686	0.052241
CCNA_00451	-0.0242824	-0.10816
CCNA_02161	-0.0356859	1.0096
CCNA_01898	0.0663767	0.261059
CCNA_01943	-0.146748	-0.122873
CCNA_01946	0.028115	0.057235
mfd	0.235561	-0.24247
CCNA_01096	0.068066	0.149051
CCNA_01097	-0.0957703	0.313588
CCNA_01095	0.106522	0.852053
CCNA_01090	0.158781	1.26768
CCNA_01091	0.0589913	0.152742
CCNA_03828	0.0446936	-0.429835
CCNA_03827	0.058294	-0.587728
CCNA_03821	-0.0725112	-0.0980088
CCNA_03820	-0.144568	0.157675
sufC	-0.064401	-0.153766
sufD	0.17665	0.136562
adk	0.103911	-0.539567
CCNA_01741	-0.0943138	0.703608
CCNA_00921	-0.477173	1.0099
CCNA_00920	0.223702	0.25046
CCNA_00929	0.0241463	-0.157585
CCNA_03311	0.137321	-0.339248
CCNA_01624	0.00116667	0.0307301
cpaB	-0.141032	-0.770804
cpaC	-0.218088	-0.341997
CCNA_01626	-0.076677	0.856942
cpaD	0.523331	-0.54268
CCNA_00859	0.0374666	0.133214
CCNA_00858	0.0338569	-0.0387559
CCNA_02972	-0.164531	0.239694
CCNA_00851	0.000712676	-0.406246
CCNA_00326	0.0505605	0.0291702
CCNA_00324	-0.0642486	0.862964
CCNA_00323	0.181081	0.651815
CCNA_00321	-0.124495	-0.188729
CCNA_00320	0.097138	2.35536
murD	0.139333	-0.24668
murG	0.197686	0.0121751
CCNA_03865	0.0888865	0.598137
CCNA_00212	0.00679648	0.408027
CCNA_00211	-0.0148111	-0.15699
CCNA_00210	0.151502	-0.0549081
CCNA_00217	0.0949982	0.229731
CCNA_00215	0.0504744	0.0139775
CCNA_00214	-0.0331412	-0.111379
CCNA_00218	#NAME?	-0.540473
CCNA_00138	-0.0682201	0.0408245
CCNA_00133	0.0632675	0.401805
CCNA_00130	0.104962	0.373461
CCNA_01409	-0.18639	0.191399
mraW	0.669682	-0.175928
CCNA_02994	0.0925984	0.296223
fliL	0.129542	-0.0819332
hlyD	-0.0894774	0.301295
qoxB	#NAME?	0.606743
CCNA_00041	-0.0279731	-0.180936
CCNA_00047	-0.140187	-0.0432457
CCNA_00045	-0.0728606	-0.0149083
CCNA_03227	0.466129	0.490694
CCNA_01534	-0.117321	-0.167452
CCNA_01539	-0.0444285	-0.107021
CCNA_01538	0.152203	-0.12445
CCNA_03228	-0.0710579	-0.135851
sciP	0.137491	-0.534129
CCNA_02576	-0.0552397	0.220933
CCNA_02577	#NAME?	-1.04727
ctaG	-0.211963	-0.219018
CCNA_02572	0.000771097	0.194267
CCNA_03006	0.156882	-0.0376146
CCNA_03557	0.109308	0.184183
CCNA_03799	#NAME?	-0.500891
CCNA_00594	0.0529408	1.63319
CCNA_00591	-0.32848	0.464333
CCNA_00592	-0.61972	0.83441
CCNA_00593	-0.0977658	0.351063
CCNA_01629	-0.0567744	0.353373
CCNA_01621	0.284519	0.100122
CCNA_02566	0.160768	0.171829
CCNA_03316	0.220468	-0.235606
CCNA_03315	#NAME?	-0.197822
CCNA_03314	0.1134	0.27147
CCNA_02378	-0.210586	-0.576764
CCNA_02379	#NAME?	-0.367811
CCNA_03177	0.288163	0.479573
CCNA_03483	0.304571	-0.0594111
CCNA_03485	0.138231	0.185489
CCNA_00669	#NAME?	0.328479

## Sheet: enriched
CCNA	LFQ	RPKM
tolB	-0.0980257	0.164372
CCNA_03617	0.100218	0.263995
CCNA_01335	0.0903288	-0.32359
CCNA_02846	-0.0330367	0.285246
CCNA_01584	0.0690856	-0.323688
CCNA_01344	-0.241572	-0.385865
CCNA_03681	0.126901	-0.054802
CCNA_00424	0.00535763	-0.0957686
katG	-1.38848	-0.172867
CCNA_00167	-0.214117	-0.269676
CCNA_01966	0.104891	-0.488679
CCNA_00894	0.0717667	-0.321787
CCNA_00930	-0.00582693	-0.269885
CCNA_01303	0.189578	-0.0955951
CCNA_00687	#NAME?	-0.0005539
CCNA_03002	-0.132098	-0.229384
