# Supplementary material for: Gene network analysis identifies a central post-transcriptional regulator of cellular stress survival
Source: eLife journal article supplement (doi:10.7554/elife.33684), 2018-03-14
Supplement: supp [file elife-33684-supp-v1.zip › elife_poa_e33684_Figure_8_source_data_2.xlsx]

## Sheet: RPKM_diff_exp.txt
Name	SCR_197	SCR_198	SCR_199	SCR_200	SCR_201	SCR_202	SCR_203	SCR_204	SCR_205	SCR_206	Region	Max_Group_mean	Log2FoldChange	FoldChange	Pvalue	FDR_Pvalue	Bonferroni
abfA	29.6262	44.8851	44.6793	55.2648	37.2583	54.9178	72.4499	44.9361	56.3121	48.0078	1596728..1598278	55.3248	-0.439501	-1.35614	0.216029	0.741039	1
acnA	55.3644	31.9474	35.1495	35.9546	40.456	35.0202	37.147	30.8993	36.5639	36.0181	complement(3947320..3950007)	39.7744	0.0892954	1.06385	0.807115	0.972736	1
acpS	0	2.07396	1.63783	0.954019	1.30682	2.62125	0	1.34746	1.57058	0.459613	1748329..1748730	1.19978	-0.084702	-1.06047	0.907953	0.998993	1
acrB	8.72479	5.73425	4.37044	5.76623	7.05834	4.66308	3.90934	3.40787	4.3088	4.72846	3475295..3478420	6.33081	0.470648	1.38573	0.110052	0.661366	1
acrB2	7.13893	4.02865	4.48536	4.01014	5.99249	5.11958	3.87218	5.09182	5.26812	3.51263	complement(923136..926291)	5.13112	0.0528906	1.03734	0.857233	0.987462	1
acrB3	5.56321	4.4418	4.60719	3.53752	5.0128	4.24536	3.50774	4.07752	5.02047	4.87769	1389121..1392264	4.63251	-0.0117347	-1.00817	0.967047	0.998993	1
acrB4	15.2101	21.6572	21.2459	25.9266	24.4108	25.2753	25.6802	16.6634	21.0526	20.5095	2000523..2003621	21.8362	-0.0625166	-1.04429	0.853675	0.987462	1
acrB5	4.63661	7.06323	6.4897	5.62339	6.6759	6.75256	3.69058	6.11867	5.28031	5.47852	3379745..3382813	6.09777	0.084625	1.06041	0.787146	0.964914	1
adk	7.72014	11.9415	14.0026	16.6456	5.92834	13.4157	10.3494	16.9275	19.7304	18.6048	1442583..1443158	15.8056	-0.539567	-1.45354	0.0971441	0.636703	1
alkB	7.63809	24.8375	14.5783	19.4537	13.5354	15.8372	12.9593	18.0269	19.9952	13.0912	complement(7170..7790)	16.0086	-0.0535511	-1.03782	0.872614	0.991389	1
argJ	5.94547	8.3604	6.03314	6.63063	2.17984	6.07274	4.12259	5.4942	6.84061	8.04991	complement(3317963..3319408)	6.11601	-0.134923	-1.09803	0.689533	0.935624	1
atpA	28.427	20.1227	23.622	21.1396	10.7947	19.4756	11.8603	15.5472	17.2979	22.2971	complement(3717106..3718638)	20.8212	0.184811	1.13667	0.529084	0.881341	1
atpD	98.0858	15.6968	15.749	16.8084	17.025	14.4185	17.847	11.48	10.5229	18.9327	complement(3714529..3716148)	32.673	1.01474	2.02053	0.0181674	0.382546	1
bacA	214.715	32.1656	30.8206	39.0618	41.0761	24.5729	22.0788	17.09	27.7146	34.2157	2091495..2091980	71.5679	1.35838	2.56398	0.001107	0.086299	1
bacB	24.568	29.173	29.7072	31.4299	15.4797	32.3432	27.446	20.9489	23.255	29.2629	3266288..3266830	26.6512	-0.0732468	-1.05208	0.795366	0.968137	1
bamA	38.4988	11.6384	12.0458	11.6807	16.3336	12.0351	11.0954	9.39459	11.9295	12.1926	complement(2137316..2139679)	18.0395	0.553052	1.46719	0.103439	0.652481	1
bamB	46.1978	7.28279	8.28188	7.90615	20.1913	8.95914	9.16477	6.18268	9.70666	10.3293	1851328..1852758	17.972	0.884595	1.84625	0.0291164	0.445543	1
bamD	10.2005	8.06839	11.5045	9.89717	5.64884	5.66528	3.84598	7.3777	8.37306	8.14553	complement(2213567..2214496)	9.06388	0.356896	1.28067	0.260785	0.774074	1
bamE	12.2755	2.1577	5.79346	3.17611	6.52599	3.6361	2.46843	2.99063	4.79304	3.44282	complement(1544458..1544940)	5.98575	0.622675	1.53973	0.169839	0.719432	1
bamF	5.20094	1.46269	1.44388	3.02775	4.14744	3.69734	2.09167	0.950313	1.10767	1.94489	complement(792461..793030)	3.05654	0.454967	1.37075	0.386733	0.829294	1
bapE	6.17611	5.58304	0.979776	2.28283	1.56352	0.52269	2.66128	3.76166	2.50545	4.39916	complement(719608..719943)	3.31705	0.105758	1.07606	0.862483	0.989785	1
bioC	15.9279	53.2511	36.458	48.9907	23.3293	48.3351	55.2332	41.1802	38.7686	42.7471	952833..953744	45.2528	-0.391025	-1.31132	0.287961	0.781233	1
brnT	1.99632	8.42155	6.09638	7.74779	15.035	3.54795	18.0644	4.86356	7.79474	2.48841	complement(536509..536805)	7.85941	0.0992724	1.07123	0.84781	0.987357	1
cckA	2.99881	2.30923	3.72655	4.80318	1.13875	2.36872	2.15364	3.39201	3.34543	3.11501	1235738..1237813	2.9953	-0.009772	-1.0068	0.978672	0.998993	1
ccmA	2.41019	2.37241	2.94411	1.55901	2.13554	0.856701	0.969311	1.46796	1.36883	1.50215	3950191..3950805	2.28425	0.801804	1.74328	0.111441	0.664618	1
ccmB	1.7805	7.19815	10.1332	9.21359	5.12721	9.22948	6.71314	8.67553	11.0601	7.76788	3950802..3951467	8.68923	-0.390792	-1.31111	0.282032	0.779589	1
CCNA_00001	6.54422	9.43241	9.81073	10.5827	4.63878	9.69226	9.86964	8.5696	6.50422	8.76918	202..1107	8.68098	-0.0998643	-1.07167	0.745939	0.95095	1
CCNA_00002	9.38769	3.1265	3.01771	8.6291	7.44234	7.02495	4.96772	5.11585	6.31374	5.235	1104..1703	6.32067	-0.007668	-1.00533	0.983894	0.998993	1
CCNA_00003	17.9669	7.53081	9.20852	6.25783	9.79658	9.21104	9.37961	5.68194	7.84925	6.24496	1700..2557	10.1521	0.303374	1.23403	0.356282	0.807355	1
CCNA_00004	4.4468	13.5482	10.4248	8.3095	4.37785	16.6843	5.96126	9.32891	12.9782	13.8573	2559..3158	11.762	-0.546779	-1.46082	0.151051	0.711814	1
CCNA_00006	9.39333	16.1146	17.9414	17.9849	8.98874	17.5846	8.31101	20.1384	15.7377	19.6707	4022..4810	16.2885	-0.272014	-1.20749	0.417853	0.840944	1
CCNA_00007	41.8901	7.55193	8.34939	13.2007	5.71024	7.63582	9.71945	6.54201	3.05012	2.67775	4960..5235	15.3405	1.2239	2.33577	0.0166128	0.371511	1
CCNA_00019	473.951	192.299	158.361	242.045	528.662	264.684	331.024	210.51	208.463	229.131	19815..20447	319.063	0.26499	1.20163	0.527152	0.881341	1
CCNA_00020	15.8108	6.48459	5.85253	8.52257	10.5068	17.1721	14.572	12.8398	8.41832	3.2847	complement(20444..20668)	11.2574	-0.379875	-1.30123	0.389136	0.830374	1
CCNA_00021	22.8457	15.1121	12.3095	16.264	18.3259	15.7765	17.9409	11.6092	10.9404	11.374	complement(20840..23032)	16.9714	0.243799	1.18411	0.417577	0.840944	1
CCNA_00022	16.1905	2.74771	1.54993	1.4445	7.91475	6.94557	1.12265	0.680073	2.7744	4.52343	complement(23029..23559)	5.96948	0.734681	1.66403	0.216162	0.741039	1
CCNA_00023	3.561	9.38889	15.8176	10.3653	8.67682	7.91098	13.4263	10.8444	9.48009	8.87758	23742..24074	10.1079	-0.0499696	-1.03524	0.896198	0.996733	1
CCNA_00024	29.9448	37.663	36.763	38.3085	38.9142	15.1774	19.4025	22.0886	23.8566	27.3725	24091..24981	36.3187	0.680512	1.60271	0.0218586	0.407728	1
CCNA_00025	44.477	32.2801	38.935	41.5301	33.688	44.6231	46.161	34.8448	37.8137	39.1213	complement(24991..26643)	40.5128	-0.14852	-1.10843	0.64847	0.924535	1
CCNA_00026	5.04508	4.08693	3.65377	6.38483	7.09396	5.39281	6.72655	3.33998	3.5816	4.16968	complement(26701..29403)	5.25291	0.115262	1.08317	0.714665	0.943876	1
CCNA_00027	3.0075	6.6457	8.58795	8.33729	4.18751	6.36318	4.31976	5.49529	7.9303	7.76547	complement(29502..30191)	6.3748	-0.0704359	-1.05003	0.845827	0.987357	1
CCNA_00028	8.80934	11.1308	6.09638	11.5616	6.67424	12.1772	13.8634	10.4976	8.51983	9.86684	complement(30337..32658)	10.985	-0.37824	-1.29976	0.190725	0.727631	1
CCNA_00029	6.0883	10.5369	8.58116	12.7233	7.46932	9.71064	12.7136	5.99013	9.30936	7.00529	32914..33546	9.07979	0.0294128	1.0206	0.927255	0.998993	1
CCNA_00030	14.9235	6.80599	13.6609	8.60953	15.0098	8.36304	13.3824	12.283	10.0218	9.55245	33595..34329	11.8019	0.0597197	1.04226	0.849107	0.987362	1
CCNA_00033	13.5822	4.87221	5.30975	6.90292	5.15763	7.71792	6.13127	3.71417	5.50989	8.89703	complement(35824..37962)	7.16495	0.0579817	1.04101	0.856366	0.987462	1
CCNA_00034	523.734	82.6014	89.0072	85.2257	149.82	104.073	60.7166	73.5613	72.4911	113.596	complement(38211..38480)	186.078	0.990518	1.9869	0.0180979	0.382546	1
CCNA_00035	7.94355	10.4999	13.9374	12.3317	2.81534	8.84707	3.83361	10.8374	12.1808	9.90164	complement(38495..39427)	9.50556	-0.008535	-1.00593	0.982451	0.998993	1
CCNA_00036	3.29393	5.55822	8.41301	2.13064	1.16743	3.51248	3.31181	7.62362	9.35369	5.74823	complement(39430..39879)	5.90997	-0.54183	-1.45582	0.28024	0.779589	1
CCNA_00037	5.26026	0.792522	0.834486	2.43039	1.9975	0.445181	3.02219	1.14423	0.26674	2.34176	complement(39980..40768)	2.26303	0.527471	1.4414	0.383551	0.82658	1
CCNA_00038	8.74949	2.53304	2.85768	4.32787	5.01628	4.26863	1.03494	1.56736	4.74992	2.56617	complement(40828..41403)	4.69687	0.534816	1.44876	0.256869	0.771265	1
CCNA_00039	7.42561	2.81124	2.22007	3.69475	1.51833	3.72228	4.59442	2.78319	2.43304	4.27201	complement(41403..41921)	3.56099	-0.142211	-1.10359	0.76084	0.955729	1
CCNA_00040	221.803	60.0379	69.7771	60.4454	128.956	73.8129	95.0346	66.4014	73.2028	72.9686	complement(41960..42511)	108.204	0.391946	1.31216	0.29347	0.782733	1
CCNA_00041	11.9364	10.6624	7.60539	9.36639	6.06831	10.7809	8.85336	7.68719	9.09901	12.4396	complement(42585..45614)	9.772	-0.180936	-1.13362	0.536813	0.882162	1
CCNA_00042	3.18767	17.2894	16.4349	17.6735	2.82442	28.0566	18.3142	12.7584	17.7806	15.6099	complement(45893..46543)	18.504	-0.702788	-1.62765	0.0902431	0.628012	1
CCNA_00044	10.2935	2.17118	2.00038	1.33165	4.10423	1.82941	3.10483	2.50777	2.92303	2.56617	complement(48271..48846)	3.98019	0.441274	1.3578	0.393033	0.8325	1
CCNA_00045	31.0887	42.9357	43.7707	46.3235	22.6271	34.5328	44.6537	28.7407	34.2881	41.5201	49105..49638	37.3491	-0.0149083	-1.01039	0.960456	0.998993	1
CCNA_00046	4198.61	1415.95	1376.36	1687.67	3223.32	1837.47	2308.26	1426.75	1403.05	1147.26	complement(49645..50031)	2380.38	0.449561	1.36562	0.292882	0.782733	1
CCNA_00047	3.48257	3.36676	2.90048	0.563165	2.31428	4.12626	0.437685	0.795416	1.23617	5.69758	complement(50132..50812)	2.52545	-0.0432457	-1.03043	0.940134	0.998993	1
CCNA_00050	18.2376	13.4769	16.0159	20.1027	18.6327	13.6707	12.5362	17.7953	12.683	14.7301	complement(52707..54299)	17.2931	0.181894	1.13437	0.51858	0.881341	1
CCNA_00052	1.30023	2.28545	2.88776	2.94365	6.33636	6.54738	2.61459	3.95964	2.76918	1.62074	complement(55231..55686)	3.50231	-0.25056	-1.18967	0.634186	0.922486	1
CCNA_00054	6.16236	11.2959	11.2423	11.104	6.24014	10.0394	6.63838	9.78533	8.28083	11.2477	complement(56665..58011)	9.20896	-0.0502608	-1.03545	0.878243	0.992477	1
CCNA_00055	77.0197	18.902	14.9272	15.0398	21.2454	10.3308	15.3415	10.1786	9.80074	13.1328	complement(58201..58608)	29.4268	1.1844	2.27269	0.002581	0.144175	1
CCNA_00056	0.654422	5.0613	2.54352	3.38645	1.73954	1.16307	6.57976	2.7901	0.929174	0.815737	complement(58654..59106)	2.67705	0.193622	1.14363	0.750341	0.952215	1
CCNA_00057	5.12734	1.63863	1.03523	2.41205	3.71704	1.93297	0.937306	0.567797	0.661818	2.9051	complement(59115..59750)	2.78606	0.771887	1.7075	0.164096	0.718816	1
CCNA_00058	1.87332	4.28062	7.28099	2.42348	3.3197	3.32936	1.8835	1.71146	5.31963	5.54586	complement(59754..60386)	3.83562	0.0970571	1.06959	0.837764	0.984258	1
CCNA_00059	31.2587	14.5336	10.3576	21.8499	30.3769	27.7772	37.5114	12.59	14.6748	13.8259	complement(60534..61121)	21.6754	-0.0552778	-1.03906	0.876994	0.992477	1
CCNA_00060	18.108	28.7369	36.1953	25.0992	15.5861	26.9719	13.5247	27.7299	33.7908	30.6329	complement(61191..61763)	26.53	-0.155618	-1.1139	0.638982	0.922711	1
CCNA_00061	21.7259	12.3188	12.4522	12.9954	19.4571	14.8083	8.45569	11.9519	11.4433	11.5023	61885..63153	15.7899	0.319289	1.24772	0.288653	0.781233	1
CCNA_00064	1.81468	4.40761	4.94631	3.73485	1.75406	3.81153	3.81494	3.41626	2.81079	3.29019	complement(66331..68127)	3.42874	-0.050251	-1.03545	0.888164	0.995494	1
CCNA_00065	21.0658	4.03941	2.33931	1.73424	6.10863	5.4457	1.54038	1.86625	2.99101	4.77428	complement(68289..69062)	7.05748	0.918083	1.8896	0.0731123	0.599932	1
CCNA_00066	4.01698	3.38916	3.56861	3.11801	0.711845	3.33162	0.807759	3.91457	1.71104	4.50645	complement(69120..69488)	2.96092	-0.0792581	-1.05647	0.880041	0.992477	1
CCNA_00067	6.30752	1.47825	0	1.35998	13.0404	3.1139	6.34177	1.28056	0.746305	0	complement(69493..69774)	4.43723	0.862186	1.81779	0.312091	0.790776	1
CCNA_00069	3.49085	2.07678	1.49096	1.73694	1.42756	2.54527	3.23982	1.79905	1.14379	2.00831	complement(70801..71904)	2.14725	-0.161656	-1.11857	0.687196	0.935624	1
CCNA_00070	1.83562	1.29061	2.37816	2.5726	0.271074	1.2687	0.922796	1.49069	2.3891	1.71608	71977..72945	1.66961	0.0816078	1.0582	0.871683	0.991045	1
CCNA_00071	1.29456	0.303396	1.91677	0.279123	2.67641	1.02255	1.30159	2.10258	1.83806	1.88261	72950..73636	1.62948	-0.439215	-1.35587	0.459974	0.854477	1
CCNA_00072	2.64395	0.697101	1.10102	0.64133	2.04983	2.54527	0.332289	1.20776	1.40775	0.823922	73680..74576	1.42665	-0.0602977	-1.04268	0.913741	0.998993	1
CCNA_00073	3.47406	5.02086	2.8934	5.86759	3.24918	3.77317	7.95611	5.76004	5.48068	4.21013	74573..76108	5.43602	-0.450894	-1.36689	0.175464	0.720859	1
CCNA_00074	6.4622	9.56029	12.1845	6.61834	2.50504	8.29467	5.54977	10.1677	10.0355	13.2574	complement(76477..78678)	9.46101	-0.39258	-1.31274	0.287243	0.781233	1
CCNA_00075	25.319	31.6279	24.0216	29.8926	16.3353	28.9794	28.6694	21.2599	25.4783	24.2063	complement(78703..79908)	25.7187	-0.0723102	-1.0514	0.792885	0.966557	1
CCNA_00076	2.31604	9.77031	6.85843	10.9861	1.36808	3.65883	5.43344	5.64248	6.02874	6.73621	complement(79975..80358)	6.2598	0.174927	1.12891	0.715374	0.943897	1
CCNA_00077	6.80633	16.306	13.4369	15.0015	4.02047	17.1741	13.94	15.6608	17.1802	12.569	complement(80355..81530)	15.3048	-0.508939	-1.423	0.134135	0.699217	1
CCNA_00078	5.9489	3.02077	3.39481	3.52732	3.80682	4.0137	2.15988	2.51616	4.45786	3.29569	complement(81533..83326)	3.93972	0.11965	1.08647	0.714589	0.943876	1
CCNA_00079	3.08806	5.64507	11.3164	9.18839	2.18892	6.22001	3.72579	7.89948	5.26145	3.84926	complement(83414..83893)	6.28537	0.189504	1.14037	0.662536	0.926901	1
CCNA_00080	127.447	898.341	280.747	957.295	310.132	1011.89	1427.64	498.085	390.101	335.569	84087..84728	732.657	-0.554258	-1.46841	0.293463	0.782733	1
CCNA_00081	28.2337	3.97016	4.70292	3.65253	13.759	0	4.25805	0	1.00218	0	complement(84763..84972)	10.8636	3.34398	10.154	0.00012	0.0329237	0.490351
CCNA_00083	1.62589	4.19153	2.60796	3.15506	4.48189	3.10365	4.90415	2.75075	4.104	5.62963	complement(87043..88683)	4.09844	-0.389757	-1.31017	0.259528	0.771693	1
CCNA_00085	8.59285	24.4408	17.7831	24.0013	17.6498	25.9155	33.7726	22.8376	23.2918	27.9946	90655..91413	26.7624	-0.567739	-1.4822	0.0812292	0.612216	1
CCNA_00087	64.098	38.6822	39.2969	45.78	77.8547	53.1618	38.6677	33.5092	38.6788	42.113	complement(96628..97737)	53.1424	0.281377	1.21535	0.393802	0.8325	1
CCNA_00088	26.4793	6.20578	7.13809	6.32987	22.2718	6.13831	6.17348	3.50601	7.08338	7.53409	97841..99385	13.685	1.05903	2.08353	0.005045	0.212479	1
CCNA_00089	45.871	22.7304	19.3052	25.252	50.2642	26.5242	29.6837	20.0622	21.5654	18.7806	complement(99466..101895)	32.6846	0.396039	1.31589	0.274802	0.779053	1
CCNA_00090	27.1146	6.35467	6.69115	10.3284	13.881	7.13918	9.69311	5.50486	5.13312	6.19637	complement(101960..102943)	12.874	0.815181	1.75952	0.0270234	0.439804	1
CCNA_00091	6.30046	3.73035	2.02531	2.57393	6.75775	2.55381	3.66744	1.81771	2.82494	3.10008	complement(103149..104042)	4.27756	0.493178	1.40754	0.210825	0.733578	1
CCNA_00092	0.33272	2.80718	3.14056	3.65868	1.17922	4.33639	4.34885	3.44502	4.25168	5.39156	complement(104039..104929)	4.3547	-0.882372	-1.8434	0.0273847	0.442342	1
CCNA_00093	0	0.99254	0	0.913132	1.25081	0	0	0.859807	1.00218	3.51932	complement(105028..105237)	1.07626	-0.839268	-1.78914	0.458203	0.852778	1
CCNA_00095	1.7805	3.75556	6.09638	3.83899	3.94401	4.39499	5.07215	1.8074	5.68805	5.17859	complement(106334..107332)	4.42824	-0.180951	-1.13363	0.630557	0.922486	1
CCNA_00096	1.01179	2.37126	1.31083	0.654463	0.597659	0.998998	0.339094	0.616244	1.91543	2.10199	107402..108280	1.19435	-0.0729347	-1.05185	0.898054	0.996733	1
CCNA_00097	0	4.99513	8.24805	3.75996	5.15041	6.12196	1.29875	7.47414	6.4192	8.85582	108334..108792	6.03397	-0.463466	-1.37885	0.355154	0.806898	1
CCNA_00098	7.13118	1.43253	0.565644	1.31792	0.902649	0	0	2.48192	0	0.63493	complement(108943..109233)	2.26999	1.39384	2.62777	0.156792	0.715952	1
CCNA_00100	0.449172	3.15808	2.99277	6.10138	1.59194	3.19316	2.25805	3.2829	1.2755	3.6393	complement(110979..111638)	2.85867	0.0427429	1.03007	0.933677	0.998993	1
CCNA_00102	0	0	0	0	0	0	0	0	0	0	113151..113375	0	NaN	NaN	NaN	NaN	NaN
CCNA_00103	3.3172	4.05082	3.9745	5.75951	3.55797	4.65434	6.14382	3.1901	4.7099	4.1349	113463..115160	4.56661	-0.137378	-1.0999	0.658261	0.925741	1
CCNA_00104	7.60137	8.90741	5.15848	5.46318	10.4769	5.00353	5.51969	6.43018	5.09656	6.05354	complement(115289..115990)	7.52147	0.299768	1.23095	0.381787	0.826433	1
CCNA_00105	97.5455	107.348	46.861	122.626	102.588	95.7263	224.72	41.3298	53.2919	36.7414	116088..116786	95.3937	0.0156902	1.01093	0.970805	0.998993	1
CCNA_00106	3.04415	3.62206	3.77051	4.69549	3.73466	2.49702	4.70874	3.13768	5.98459	5.25397	116834..118099	4.3164	-0.225798	-1.16942	0.502105	0.881341	1
CCNA_00107	11.9779	18.9485	0	24.2118	3.97986	16.8528	12.043	10.0311	7.44043	8.39839	complement(118260..118457)	11.8236	0.0175189	1.01222	0.974204	0.998993	1
CCNA_00108	13.5547	1.84454	2.91332	4.52526	6.19872	3.10839	3.51697	3.72837	5.58738	2.72514	complement(118467..119144)	5.8073	0.467887	1.38308	0.284924	0.781233	1
CCNA_00109	3.95271	7.17937	4.75518	8.9487	3.50228	6.04926	4.96772	4.6143	3.03995	6.15882	complement(119160..120059)	5.66765	0.14405	1.105	0.693636	0.937005	1
CCNA_00110	12.2791	27.9556	26.6221	40.4696	25.9044	43.9925	57.0259	46.2973	37.3594	40.8158	complement(120169..120675)	45.0982	-0.802532	-1.74416	0.0153154	0.371511	1
CCNA_00111	50.7979	37.6687	27.7642	42.6128	40.0863	34.5605	30.7241	31.4227	31.8363	33.6385	120752..121498	39.786	0.181839	1.13433	0.519759	0.881341	1
CCNA_00112	5.32096	3.20667	4.22057	3.93349	0.673515	1.35095	1.52853	4.16676	4.85672	9.00135	121503..121892	4.18086	-0.362245	-1.28542	0.518853	0.881341	1
CCNA_00113	24.3164	3.27382	3.1599	3.34656	12.8356	5.82348	7.8027	2.5209	2.57104	2.57961	121972..122544	9.38646	1.01307	2.0182	0.0489549	0.527654	1
CCNA_00114	11.6256	0.681155	4.30333	5.63993	7.72562	5.16541	0.974063	5.31057	4.8144	5.43425	122547..122852	5.99513	0.239215	1.18035	0.658189	0.925741	1
CCNA_00115	9.6147	35.803	36.3806	34.0903	18.6157	36.0213	24.7043	37.5759	39.6268	34.9555	122939..126268	34.5768	-0.411417	-1.32999	0.3249	0.79382	1
CCNA_00116	14.7456	8.04642	7.20975	12.9547	14.6253	7.95327	7.96605	6.43419	4.99974	5.62386	complement(126407..127753)	11.5164	0.703639	1.62861	0.0194129	0.391363	1
CCNA_00117	8.62824	6.75319	6.59855	8.21368	6.3468	8.1977	8.6751	6.44501	5.66307	7.10243	127915..129735	7.30809	-0.0442864	-1.03117	0.879528	0.992477	1
CCNA_00118	66.5831	30.4662	31.6881	32.7287	51.8553	37.9579	40.7778	29.6105	32.5441	29.3944	129746..131989	42.6643	0.231357	1.17394	0.528195	0.881341	1
CCNA_00119	3.20837	0.902309	1.06885	1.24518	2.84276	0.760276	1.29032	1.56329	0	1.19977	131977..132438	1.85349	0.705475	1.63068	0.29843	0.784317	1
CCNA_00120	8.56802	23.6947	11.7347	13.3011	14.1711	22.672	16.0805	17.7428	21.0864	16.376	132435..132953	18.7916	-0.448497	-1.36462	0.170182	0.719432	1
CCNA_00121	5.16694	9.08206	7.17221	6.68437	6.29495	6.50458	9.09125	4.32713	4.58514	7.24567	complement(132950..133408)	6.88011	0.123119	1.08909	0.728866	0.946907	1
CCNA_00122	6.49168	3.54996	2.80345	1.86626	2.55641	3.41847	1.45043	7.4684	3.58444	1.34865	complement(133417..133827)	3.45408	-0.187073	-1.13845	0.736548	0.949874	1
CCNA_00123	35.2109	416.867	242.384	436.904	94.9373	417.639	310.625	304.391	275.773	261.927	133900..134682	314.071	-0.402871	-1.32214	0.436733	0.847802	1
CCNA_00124	275.278	12.7612	13.7169	16.6321	55.8399	15.5314	14.7004	9.51929	12.8852	13.1975	complement(134826..135413)	74.8456	2.33069	5.03048	2.013e-05	0.0137067	0.0822401
CCNA_00125	3.1019	3.1156	1.23021	1.14653	2.35579	2.62517	0.891071	4.31831	2.51669	3.59034	complement(135509..136177)	2.78832	-0.55166	-1.46577	0.271042	0.779053	1
CCNA_00126	79.9261	48.0214	20.5753	58.2793	135.198	40.0319	70.1325	26.5529	20.1173	19.9256	complement(136184..136591)	68.4001	0.874198	1.83299	0.0316272	0.456526	1
CCNA_00127	13.274	5.18491	1.63783	6.67813	9.14774	1.7475	1.4829	0.898306	2.09411	4.59613	136811..137011	7.18453	1.46119	2.75334	0.0292875	0.445543	1
CCNA_00128	41.7982	9.17311	10.5979	7.34524	13.7008	7.4429	5.83009	8.24069	9.26221	10.9925	complement(137246..138472)	16.5231	0.840686	1.7909	0.0245559	0.419699	1
CCNA_00129	2.45003	0	3.17415	4.22607	2.89445	1.45144	4.10555	4.47668	1.73932	1.01799	complement(138555..138917)	2.5582	-0.0309423	-1.02168	0.961489	0.998993	1
CCNA_00130	71.3684	38.4944	44.1576	55.3775	93.473	52.3004	52.0641	39.8532	39.079	37.4523	complement(138921..140918)	60.5742	0.373461	1.29546	0.323803	0.79382	1
CCNA_00131	0	0.9855	0.778261	0.906656	0	0.830372	3.52321	0.853709	2.48768	0	141119..141541	1.53899	-1.21789	-2.32607	0.175583	0.720859	1
CCNA_00133	6.83185	3.0879	2.43855	3.62998	4.75618	2.89093	2.94383	3.71522	2.42503	2.12897	142680..143894	4.14889	0.401805	1.32116	0.239459	0.760238	1
CCNA_00134	13.8207	7.28788	8.05746	9.38674	17.7563	10.2345	4.8635	5.05061	8.83041	9.90579	143989..144417	11.2618	0.383411	1.30442	0.271976	0.779053	1
CCNA_00135	4.97644	11.2464	12.0393	9.65687	9.76355	13.6877	12.1513	9.30942	11.8603	16.1724	144443..145276	12.6362	-0.428643	-1.34597	0.191272	0.727631	1
CCNA_00136	65.9962	28.6596	27.8256	40.1778	59.4137	37.5291	54.1127	22.355	28.4369	26.6149	complement(145273..146952)	44.4146	0.308325	1.23827	0.388317	0.830374	1
CCNA_00138	4.73136	9.50448	5.92959	11.6296	7.66573	7.52788	8.15494	7.49244	6.81373	6.82441	148752..150944	7.89216	0.0408245	1.0287	0.89613	0.996733	1
CCNA_00140	4.66122	11.3611	7.9368	10.6532	5.23139	6.62731	12.4974	8.32769	8.38302	7.94061	complement(152709..153662)	8.75521	-0.156619	-1.11467	0.628366	0.920775	1
CCNA_00141	2.5431	3.0652	4.63953	2.34997	2.89711	3.4436	0	2.21274	2.57914	1.13214	complement(153718..154533)	3.09898	0.612425	1.52883	0.207421	0.733576	1
CCNA_00142	5.48988	5.51411	6.09638	7.60943	2.08469	7.43381	11.0394	4.77671	5.56767	4.39916	complement(154535..154912)	6.64334	-0.241017	-1.18183	0.557564	0.896914	1
CCNA_00143	4.75412	7.16266	5.65644	4.17342	8.42473	5.83401	6.14563	5.58431	3.61612	5.92601	complement(154912..155784)	6.03427	0.0790835	1.05635	0.815858	0.976574	1
CCNA_00144	1.02668	1.08277	1.1401	1.66024	1.81937	3.19316	1.29032	1.25063	1.09329	1.59969	complement(155819..156973)	1.68542	-0.431023	-1.34819	0.358038	0.808409	1
CCNA_00145	7.86609	5.18491	9.827	6.36012	3.48485	7.5725	4.94301	5.68927	4.53724	9.19227	complement(156966..157568)	6.5446	-0.0231391	-1.01617	0.947304	0.998993	1
CCNA_00146	7.98528	2.10539	2.21687	2.90542	3.53766	3.54795	4.51611	0.303972	1.41723	2.79946	157593..158186	3.75012	0.479372	1.39414	0.363857	0.811329	1
CCNA_00147	0	0	0	0	4.4901	0	0	0	0	1.57918	158354..158470	0.89802	0.719501	1.64661	0.641405	0.922711	1
CCNA_00148	26.6475	14.442	16.6452	24.7777	33.9406	22.0352	22.3268	12.8488	13.3999	11.764	158546..159079	23.2906	0.419945	1.33788	0.194607	0.727631	1
CCNA_00149	105.319	14.6269	15.8827	19.344	21.8892	13.0948	10.4584	8.7112	13.8459	22.6904	159096..159323	35.4124	1.19653	2.29188	0.00988	0.303458	1
CCNA_00150	10.6093	13.8529	10.4349	9.60749	4.56585	10.5949	9.44781	9.04644	9.03807	9.63496	complement(159320..160297)	9.81409	-0.0147341	-1.01027	0.964182	0.998993	1
CCNA_00151	1.65385	2.03491	2.52528	2.13956	0.732694	0.97977	1.66284	0.755479	0.880577	3.60768	complement(160464..161180)	1.81726	0.194493	1.14432	0.722229	0.946576	1
CCNA_00152	14.0382	6.38654	5.50203	10.1487	7.07285	8.96872	5.53506	6.70602	9.18433	8.92085	161320..162396	8.62967	-0.001669	-1.00116	0.995765	0.998993	1
CCNA_00154	105.633	150.934	123.609	221.146	156.999	201.194	183.863	154.963	129.016	110.434	complement(162975..163235)	155.894	-0.105485	-1.07586	0.757749	0.954365	1
CCNA_00155	3.97391	3.72535	4.85422	4.62686	3.28632	1.25558	1.59819	4.84074	4.51384	7.09998	163413..164531	4.09333	-0.007276	-1.00506	0.985882	0.998993	1
CCNA_00156	5.14676	0	0	0.665826	0	0.609805	2.06988	0	0	0	164664..164951	1.16252	0.918006	1.8895	0.464039	0.855182	1
CCNA_00157	6.37534	13.4473	19.9116	8.76312	14.8282	20.7727	8.01245	16.0174	20.9326	17.3838	165022..165393	16.6238	-0.432273	-1.34936	0.225622	0.748121	1
CCNA_00160	40.0472	44.612	52.846	44.0706	44.0089	54.8439	58.8283	53.8511	59.999	59.4812	169387..170526	57.4007	-0.402987	-1.32224	0.228563	0.754929	1
CCNA_00161	17.4941	9.97289	11.2885	7.95168	12.568	11.2041	10.4584	9.50313	12.755	14.4393	170951..171577	11.855	-0.0992928	-1.07125	0.751909	0.952215	1
CCNA_00162	278.699	87.8738	66.2819	83.5635	78.4494	125.801	108.045	118.239	103.985	115.023	171649..172917	118.973	-0.0695921	-1.04942	0.867387	0.990747	1
CCNA_00163	149.028	35.2083	35.0707	39.6472	75.015	39.9505	44.5752	36.4372	37.5412	43.5279	172964..175183	66.7938	0.603211	1.51909	0.144037	0.701621	1
CCNA_00164	73.4207	59.0886	52.9018	61.928	85.2385	63.3741	71.0338	47.4367	54.9638	68.6871	175173..177098	66.5155	0.0484413	1.03415	0.894645	0.996733	1
CCNA_00166	15.5647	21.6323	26.5293	24.1161	17.6397	29.5923	26.5673	28.2193	31.3503	27.0717	complement(178252..179070)	28.5602	-0.478466	-1.39326	0.109863	0.661366	1
CCNA_00167	12.4437	12.6089	12.5992	14.441	11.9985	14.0933	14.3512	14.7123	15.3297	15.7392	179311..180120	14.8451	-0.269676	-1.20554	0.32508	0.79382	1
CCNA_00168	82.9275	17.4567	9.37434	16.3813	33.4388	12.9438	13.9795	12.0978	14.8061	10.8321	180205..180801	31.9157	1.15333	2.22427	0.005029	0.212479	1
CCNA_00169	26.3899	31.4208	33.0488	29.6545	23.212	36.6311	25.7585	29.448	33.6405	30.9742	181379..182917	31.2904	-0.184633	-1.13653	0.58165	0.90397	1
CCNA_00170	10.671	6.40852	7.59133	7.90902	10.1444	7.30943	9.1643	5.95772	7.02316	5.0573	182997..185663	8.54485	0.233825	1.17595	0.439942	0.847876	1
CCNA_00171	0	1.9035	7.51609	2.62682	0.599705	1.2029	1.36102	2.88565	1.92199	1.68735	185853..186290	2.52922	0.504536	1.41867	0.451791	0.852037	1
CCNA_00175	7.85307	11.9631	3.63361	8.88943	2.89924	7.75381	5.26381	4.78303	6.96881	4.07869	191032..191484	7.04768	0.209501	1.15629	0.608127	0.916413	1
CCNA_00176	2.12511	0.747073	2.35989	1.37461	3.29515	0.314738	0.534163	0.647167	1.13149	0.662238	191399..191956	1.98037	1.43787	2.70921	0.0374154	0.479129	1
CCNA_00177	6.94813	3.79957	1.71461	1.99748	1.36808	1.37206	0	0.940414	0.548068	2.40579	191925..192308	3.16557	1.2566	2.38932	0.0729513	0.599932	1
CCNA_00178	1.50484	1.05804	0	2.59571	1.33335	0	1.00867	1.83309	3.20494	0.31263	192305..192895	1.29839	-0.112628	-1.0812	0.886445	0.994838	1
CCNA_00179	3.64866	2.99289	2.36352	5.31021	3.50228	3.42241	3.05706	2.96303	3.88538	5.49556	192892..193866	3.76469	-0.174551	-1.12861	0.625584	0.920775	1
CCNA_00180	5.35598	5.46031	3.56861	5.71636	8.06758	4.44216	5.11581	4.24078	4.56277	4.67336	193848..194954	5.63377	0.188415	1.13951	0.53412	0.881341	1
CCNA_00181	1.24299	3.49574	5.17617	4.82409	1.65202	7.73186	1.24974	2.27119	4.41212	4.26082	194951..195427	3.98515	-0.2939	-1.22595	0.570325	0.9019	1
CCNA_00182	13.2308	7.84895	2.98442	4.814	11.3568	7.34827	17.4598	7.30296	7.04462	5.6692	195424..196140	8.96497	-0.250665	-1.18976	0.522936	0.881341	1
CCNA_00184	0	0	0	0	0	0	0	0	1.06292	0	complement(197070..197267)	0.212584	-1.35114	-2.55113	0.529354	0.881341	1
CCNA_00185	5.51596	7.83894	4.88724	7.74319	7.27908	6.25738	4.01194	5.21807	5.4989	7.24137	complement(197285..199810)	6.65288	0.148068	1.10808	0.617028	0.920185	1
CCNA_00186	66.1787	14.402	9.74866	18.7827	53.4516	16.5356	18.1056	10.1453	9.58806	12.9069	complement(200286..201602)	32.5127	1.16033	2.23508	0.003529	0.175819	1
CCNA_00187	0.8212	3.27181	1.06391	1.06237	2.18286	0.324328	1.92654	1.33377	1.3603	2.04725	complement(201599..202681)	1.68043	0.228266	1.17143	0.670126	0.927415	1
CCNA_00188	7.38825	6.70969	7.00799	3.38513	3.81868	7.6596	3.40467	5.43741	7.4305	7.29081	complement(202763..203725)	6.2446	-0.228752	-1.17182	0.507277	0.881341	1
CCNA_00189	2.22062	3.1226	1.23298	3.59097	0	0.657767	2.23268	0	0.788232	0.692002	203869..204135	2.03343	1.30128	2.46447	0.135993	0.699217	1
CCNA_00190	0.681502	1.43747	2.27038	4.40822	0.603841	2.82613	6.85203	0.830159	1.45143	2.12373	204137..204571	2.8167	-0.457797	-1.37344	0.466468	0.85582	1
CCNA_00191	6.83645	7.42844	6.21141	5.62811	15.9695	4.41821	6.2487	6.43503	6.17696	5.42286	204697..205173	8.41478	0.452026	1.36796	0.238078	0.758346	1
CCNA_00192	7.50283	8.87772	3.45462	11.8369	9.72855	9.32324	10.6714	5.127	7.27509	5.58856	complement(205174..206793)	8.28012	0.0530366	1.03745	0.87637	0.992477	1
CCNA_00194	5.87036	14.4459	21.7297	18.9859	3.4676	15.07	12.7882	16.0895	21.532	23.7816	complement(208043..208345)	17.8523	-0.483808	-1.39843	0.24834	0.767425	1
CCNA_00199	34.6729	29.4754	32.6404	31.297	27.7892	35.9464	35.6535	27.5495	32.447	30.8432	212387..214267	32.4879	-0.117533	-1.08488	0.723433	0.946576	1
CCNA_00200	11.0853	14.4745	13.8927	11.4727	15.1541	11.4456	10.1902	11.9601	11.917	16.384	complement(214320..215255)	13.2159	0.0202336	1.01412	0.945739	0.998993	1
CCNA_00201	10.4477	24.4856	16.9195	13.516	14.6571	14.184	20.1335	17.234	16.6883	11.3952	215418..216098	16.0052	-0.0323961	-1.02271	0.919899	0.998993	1
CCNA_00202	6.17611	9.07948	9.9759	6.5372	5.72105	10.6439	8.4677	4.95855	8.17119	8.92329	216215..217270	8.23292	-0.159477	-1.11688	0.592779	0.908426	1
CCNA_00203	135.1	108.883	84.1847	138.142	154.728	109.918	141.765	82.4645	95.7008	89.9004	217328..218332	124.207	0.179774	1.13271	0.625849	0.920775	1
CCNA_00205	1.01874	5.73013	6.78772	5.27169	5.4159	8.14749	2.56068	4.96383	11.5716	9.20648	complement(220241..220822)	7.29001	-0.614059	-1.53056	0.142979	0.701621	1
CCNA_00206	5.83734	28.7292	34.4947	37.7582	5.17214	34.8283	32.6989	29.9663	28.4163	31.1839	220931..221641	31.4187	-0.522429	-1.43637	0.210292	0.733576	1
CCNA_00207	5.54118	5.51926	3.58946	8.06458	5.31888	7.38605	6.03555	5.06242	5.90069	7.48268	221641..222282	6.37348	-0.270187	-1.20596	0.421017	0.841024	1
CCNA_00208	20.6619	15.3693	20.6169	18.5947	27.859	24.8357	14.1505	16.9616	23.3842	17.7299	complement(222283..223272)	20.6204	0.001493	1.00104	0.995968	0.998993	1
CCNA_00209	9.97589	8.07266	6.16605	9.00957	10.0065	7.24797	12.4903	5.73205	6.41396	7.74251	complement(223353..224927)	8.64614	0.0689643	1.04896	0.826312	0.980833	1
CCNA_00210	45.7217	53.1453	48.4526	55.1741	39.858	50.3134	42.8806	46.5622	51.1312	48.8722	225115..227526	48.4703	-0.0549081	-1.03879	0.879146	0.992477	1
CCNA_00211	5.29381	5.37626	3.9191	4.18519	5.21172	6.79497	3.84407	4.47816	3.96697	5.31565	227686..228693	4.87996	-0.15699	-1.11496	0.642807	0.923625	1
CCNA_00212	20.9102	13.0419	7.86496	10.2533	20.6192	13.5864	13.5637	7.18951	8.85887	8.19774	228693..229571	14.5379	0.408027	1.32687	0.206918	0.733576	1
CCNA_00213	52.9188	84.2845	98.3416	69.8571	83.2509	95.0096	96.6398	90.4442	90.0868	89.8582	229568..230116	92.4077	-0.297592	-1.22909	0.383606	0.82658	1
CCNA_00214	36.6582	37.5913	27.9164	35.6148	16.5614	32.79	31.7584	30.5345	26.0244	36.9348	230262..232307	31.6084	-0.111379	-1.08026	0.74248	0.949874	1
CCNA_00215	65.3775	38.8336	30.4587	34.7546	26.9662	39.1759	37.7773	24.9442	22.6729	58.5439	232614..233402	39.2781	0.0139775	1.00974	0.963694	0.998993	1
CCNA_00216	7.54334	4.77328	15.9157	17.5656	4.67862	21.0034	13.6518	11.9454	10.1748	29.1486	complement(233470..233862)	17.1848	-0.794676	-1.73469	0.0434163	0.512272	1
CCNA_00217	4.68592	6.87995	5.73927	6.06208	4.6404	3.34755	4.15709	5.28835	5.96836	4.12306	233977..236127	5.60152	0.229731	1.17262	0.455387	0.852415	1
CCNA_00218	13.0963	37.6687	35.9172	39.019	6.68105	42.0839	22.7438	41.0912	40.0067	39.8221	complement(236131..236877)	37.1495	-0.540473	-1.45445	0.14995	0.711437	1
CCNA_00220	15.6543	71.8854	90.4498	70.2479	32.5088	48.398	38.3646	68.8271	66.6798	91.4676	237030..237635	62.7474	-0.201524	-1.14991	0.632462	0.922486	1
CCNA_00221	50.9061	41.2656	20.6169	31.7659	23.8792	36.8987	294.45	21.5212	17.0067	21.6492	complement(237642..238136)	78.3052	-1.27785	-2.42478	0.0187986	0.38771	1
CCNA_00222	2.74494	4.50319	2.94658	3.4327	3.24285	2.2766	2.57585	4.45826	4.80676	5.13235	238241..239860	3.84996	-0.270801	-1.20648	0.430109	0.843664	1
CCNA_00223	1.89306	9.05075	6.09638	7.59194	2.0128	10.5419	6.85203	6.91799	10.4826	15.1021	239869..240651	9.97932	-0.921431	-1.89399	0.0215658	0.404111	1
CCNA_00224	37.6725	32.3958	31.7781	41.1445	27.3455	43.863	37.7314	36.1825	34.8706	41.2695	complement(240648..242693)	38.7834	-0.261085	-1.19838	0.445971	0.850132	1
CCNA_00225	0	0	0	0	0	0	0	0	0	0	243024..243056	0	NaN	NaN	NaN	NaN	NaN
CCNA_00226	0	0	0.596385	2.08432	0	2.54527	4.31976	1.3084	5.3377	1.33887	243157..243432	2.97	-2.08374	-4.23905	0.0204019	0.40001	1
CCNA_00227	1.56854	1.83804	0.870912	2.02918	0	2.78768	0	1.91068	2.59825	2.93277	complement(243490..244056)	2.04588	-0.818039	-1.76301	0.170429	0.719432	1
CCNA_00228	17.8354	16.9458	12.0441	20.8907	15.803	18.5619	23.2635	12.0373	7.87079	7.51075	complement(244056..244670)	16.7038	0.214488	1.16029	0.54392	0.887049	1
CCNA_00229	20.3717	25.4396	31.4011	28.9112	24.7854	29.3607	33.0162	32.4081	28.0611	32.9734	244790..245764	31.1639	-0.298534	-1.22989	0.308259	0.790482	1
CCNA_00230	6.93878	9.58894	5.57974	13.1553	10.1761	10.631	15.8775	10.6383	7.64375	7.90357	complement(245765..247003)	10.5388	-0.274786	-1.20981	0.393659	0.8325	1
CCNA_00231	14.6397	12.0085	13.5475	16.5717	18.9166	21.3206	20.8522	10.7741	13.8573	13.3061	247055..247540	16.0221	-0.13634	-1.09911	0.652552	0.925522	1
CCNA_00232	7.10919	18.9939	9.47351	24.3721	10.7084	14.3194	12.1513	15.1549	15.6456	19.9386	complement(247537..247953)	15.442	-0.188128	-1.13928	0.600905	0.911599	1
CCNA_00233	17.7072	14.6586	17.602	17.3653	11.6405	20.1341	22.1107	17.047	20.4781	23.3181	248082..249119	20.6176	-0.423388	-1.34107	0.150169	0.711648	1
CCNA_00234	1.27672	3.77011	4.25329	5.12015	2.26245	4.99189	1.54038	5.59874	4.16928	5.56999	249116..250276	4.37406	-0.441222	-1.35775	0.26093	0.774074	1
CCNA_00235	44.0384	34.7389	14.9096	25.7067	26.6478	39.4517	25.9185	20.9344	23.6384	31.4635	complement(250273..250548)	29.2083	-0.0720797	-1.05123	0.817131	0.976574	1
CCNA_00236	6.98359	10.925	10.3725	11.6319	6.80655	10.6533	11.9366	7.86891	11.279	12.8399	complement(250611..252308)	10.9155	-0.257954	-1.19578	0.400215	0.8325	1
CCNA_00240	0	4.59779	6.85843	3.75996	2.57521	8.17856	5.11383	4.86803	4.12663	4.07569	255318..255725	5.27255	-0.50788	-1.42196	0.322625	0.79382	1
CCNA_00241	53.1278	11.9532	9.43956	12.3715	23.5368	12.5895	13.8883	5.17733	9.05196	7.94686	255722..256000	22.0858	1.05233	2.07388	0.0126512	0.346057	1
CCNA_00243	6.68692	10.4478	4.95045	5.76715	3.94994	14.0851	7.47026	4.97783	8.43942	8.33524	complement(256412..256810)	8.66157	-0.513326	-1.42734	0.181992	0.727631	1
CCNA_00244	19.3941	21.4277	25.639	26.8819	23.7304	29.5442	19.0352	28.687	29.1756	25.326	256953..257594	26.3536	-0.242449	-1.183	0.427206	0.841937	1
CCNA_00245	4.16075	21.9404	17.3266	25.5677	11.9815	11.092	11.5042	13.9379	19.1997	21.3938	257623..257907	16.1954	0.0340871	1.02391	0.930566	0.998993	1
CCNA_00246	138.797	140.016	61.15	124.179	260.332	116.636	156.995	72.5913	74.7046	85.3302	257952..258737	144.895	0.448351	1.36448	0.278538	0.779053	1
CCNA_00248	4.86683	4.90956	3.52467	5.8855	2.81232	4.51282	2.1275	3.47973	4.05594	3.29701	complement(259514..260914)	4.39978	0.228987	1.17201	0.465273	0.85582	1
CCNA_00249	14.5468	28.9197	35.6499	38.2867	12.8891	28.8249	21.6865	29.9405	32.4055	42.5177	260971..261561	31.075	-0.302935	-1.23365	0.386437	0.829094	1
CCNA_00250	8.91942	7.5914	7.42861	9.10963	9.35882	6.95264	8.02387	8.57765	9.998	8.04596	261642..262904	8.48158	-0.0498214	-1.03514	0.860126	0.988358	1
CCNA_00251	0.411741	0.868472	2.74337	3.72862	2.55375	4.63452	1.24193	1.00311	1.46151	4.3625	262953..263672	2.54071	-0.324926	-1.2526	0.555201	0.895194	1
CCNA_00253	19.3026	18.4329	18.0759	15.281	8.16858	16.0434	8.11056	15.9678	12.0671	21.7264	265999..267027	15.8522	0.01932	1.01348	0.952063	0.998993	1
CCNA_00254	76.8218	61.6298	47.2115	68.8034	77.085	78.1847	86.4812	42.7904	55.2365	56.4729	267164..268066	66.3103	-0.0161194	-1.01124	0.962721	0.998993	1
CCNA_00255	0.263514	8.33733	13.3145	8.18166	2.10137	5.93218	2.9144	8.98785	13.6564	11.4965	complement(268063..269187)	8.59745	-0.441986	-1.35847	0.39656	0.8325	1
CCNA_00256	1.3918	5.13744	3.47751	8.32751	3.39129	8.65751	3.84823	4.66233	5.92839	5.20463	complement(269206..270057)	5.66022	-0.423304	-1.341	0.27673	0.779053	1
CCNA_00257	23.6396	14.9737	17.3826	16.6686	9.62372	15.2661	13.4899	16.9923	14.0608	19.379	complement(270176..271567)	16.4576	-0.0363775	-1.02554	0.90008	0.996733	1
CCNA_00259	4.58648	5.27679	6.01921	4.58493	3.32495	6.17524	3.77295	5.84088	5.62405	10.1348	complement(271910..272620)	6.30958	-0.472335	-1.38735	0.166046	0.718816	1
CCNA_00260	49.1931	16.3834	14.1362	18.9804	61.5575	26.3308	20.8254	16.295	16.5425	9.95093	complement(272872..273558)	32.0501	0.731734	1.66063	0.0609715	0.572572	1
CCNA_00261	10.2225	35.1382	33.7403	34.8984	12.0768	28.0931	25.4096	30.2662	30.4398	25.4848	273695..274738	27.9387	-0.195517	-1.14513	0.577844	0.90397	1
CCNA_00262	9.50824	58.7338	61.8437	47.4452	25.8759	61.1565	51.8965	53.568	54.4828	55.6622	274921..275793	55.3532	-0.474075	-1.38903	0.246761	0.767425	1
CCNA_00263	22.4267	31.536	34.2435	47.5994	26.0808	31.9693	66.9409	35.8558	40.3005	36.254	complement(275815..276237)	42.2641	-0.422507	-1.34025	0.175999	0.721843	1
CCNA_00264	99.0542	56.3468	41.3475	54.2855	84.8339	60.502	68.6924	42.0442	53.3697	50.5377	complement(276384..277637)	67.1736	0.197728	1.14689	0.581333	0.90397	1
CCNA_00265	4.07496	2.86506	2.71509	4.21735	4.15219	3.74181	1.84369	2.9783	2.31431	1.7778	278017..279471	3.60493	0.36492	1.28781	0.286152	0.781233	1
CCNA_00266	1.19634	2.18695	1.72706	1.54768	1.48402	1.55921	3.36795	1.4573	2.37806	1.49124	complement(279599..280837)	2.05075	-0.270309	-1.20607	0.504286	0.881341	1
CCNA_00267	1.88824	1.77013	1.04842	1.22139	3.06728	1.11862	0.632831	3.06683	2.01075	2.94211	complement(280931..281872)	1.95423	-0.297275	-1.22882	0.554292	0.894594	1
CCNA_00269	4.49172	5.68455	2.99277	7.55409	2.38792	2.66097	5.41933	10.3958	3.82651	6.15882	284102..284431	5.69229	-0.379229	-1.30065	0.449842	0.851243	1
CCNA_00271	31.0017	14.9854	4.30333	5.01327	34.3361	6.88721	7.7925	11.8013	11.0043	2.41522	285270..285422	17.9279	1.00019	2.00026	0.0825983	0.612743	1
CCNA_00272	5.05579	3.3931	5.23155	2.97299	4.68328	5.99027	1.84845	4.61896	5.54695	6.01559	285476..286765	4.80405	-0.277721	-1.21228	0.420442	0.841024	1
CCNA_00273	17.6055	15.1733	10.4059	12.49	16.1024	7.40177	13.1331	11.0688	12.9016	17.6978	286774..287295	14.3554	0.111566	1.0804	0.731791	0.948403	1
CCNA_00274	31.0337	35.6002	33.1018	52.2976	40.5222	43.0593	51.73	36.3109	34.2067	30.5396	287636..287998	39.1693	-0.0683522	-1.04852	0.814083	0.976261	1
CCNA_00275	6.56052	4.75678	5.69164	5.56973	6.53952	7.65166	5.77163	6.24341	5.53071	4.72772	complement(288082..289527)	5.98503	-0.136237	-1.09903	0.628426	0.920775	1
CCNA_00276	22.234	13.0271	10.6306	13.5828	16.9642	12.44	27.3225	8.65181	13.5921	12.7026	complement(289617..290096)	15.2877	-0.0270854	-1.01895	0.936723	0.998993	1
CCNA_00277	5.36221	2.15435	2.26842	1.81683	2.26245	1.36142	1.28365	1.71073	2.35655	3.18285	290161..291321	2.77285	0.322707	1.25068	0.440026	0.847876	1
CCNA_00278	0.321882	3.39468	1.42977	1.87385	1.71121	0.953441	1.94178	0.980236	1.59957	3.20981	291339..292259	1.74628	0.00404	1.0028	0.99391	0.998993	1
CCNA_00279	12.0387	15.5179	16.4324	23.3614	9.33348	19.6128	15.6344	20.164	18.8736	13.7557	292311..292901	17.6081	-0.253323	-1.19195	0.444272	0.850048	1
CCNA_00280	3.58613	3.64198	1.99116	3.35061	2.47137	5.90134	1.20187	3.15494	1.41437	2.73173	complement(292898..293641)	3.00825	-0.084237	-1.06013	0.847563	0.987357	1
CCNA_00281	12.1523	3.37271	1.77565	4.34403	9.06739	5.11526	4.82303	2.53212	2.04328	2.39177	complement(293641..294567)	6.14242	0.735948	1.66549	0.0829281	0.612743	1
CCNA_00282	62.3175	38.8074	43.0042	40.8853	30.7633	31.6439	24.1673	34.7021	35.3923	41.6136	294659..294991	43.1555	0.25555	1.19379	0.41021	0.838685	1
CCNA_00283	98.4735	535.487	400.322	549.438	283.416	494.031	579.51	627.03	438.515	215.881	complement(295109..295969)	470.993	-0.395864	-1.31573	0.403105	0.8325	1
CCNA_00284	23.1465	8.45	4.20156	5.18264	8.67682	5.53769	4.47542	4.87999	3.79204	9.98727	complement(295966..296631)	9.93151	0.641679	1.56014	0.125992	0.684145	1
CCNA_00285	27.8634	23.6908	19.6084	24.7294	21.8175	22.6487	20.8481	21.3119	20.0108	21.4044	complement(296628..297542)	23.5419	0.0553288	1.0391	0.847894	0.987357	1
CCNA_00288	62.3964	47.8404	29.9419	49.1265	80.3023	50.3455	55.0707	41.0988	33.072	36.249	complement(299485..300534)	53.9215	0.236135	1.17783	0.494106	0.87703	1
CCNA_00289	1.19058	0.837082	3.30527	3.85056	1.0549	3.52658	1.19704	2.17542	5.91649	1.48405	complement(300549..300797)	2.85992	-0.427038	-1.34447	0.53481	0.881341	1
CCNA_00290	41.7655	14.2666	12.277	15.5384	17.2534	17.5732	16.1931	15.0743	12.4027	16.6163	complement(301048..304305)	20.2202	0.259791	1.19731	0.467192	0.85582	1
CCNA_00297	3.45517	11.6606	14.3883	10.5042	9.49044	12.6908	15.6327	12.6265	11.7739	12.7053	complement(311039..311896)	13.0858	-0.416797	-1.33496	0.224322	0.748121	1
CCNA_00298	18.7677	8.6174	14.0359	8.91897	11.5385	12.4797	12.7081	11.8973	10.6045	13.368	complement(311893..312666)	12.3757	-0.0762117	-1.05425	0.812748	0.976177	1
CCNA_00299	1.3853	13.6358	14.6142	13.2916	4.90974	14.9089	8.12478	13.6404	12.6209	11.7996	312678..313961	12.2189	-0.38535	-1.30618	0.333768	0.794141	1
CCNA_00300	23.2512	3.0652	5.24468	7.51991	16.7388	3.01315	8.03602	6.19567	2.57914	5.88711	complement(313978..314385)	11.164	0.978706	1.9707	0.0368754	0.477291	1
CCNA_00301	9.85441	5.58132	9.72719	7.61365	6.54858	6.81089	3.57786	8.00264	8.74479	12.4541	314615..315697	7.91806	-0.104538	-1.07515	0.755325	0.953285	1
CCNA_00302	9.19235	21.8128	20.7986	22.5947	7.94121	18.9238	20.1019	18.1959	23.9824	19.4791	315702..316991	20.1366	-0.336491	-1.26268	0.280024	0.779589	1
CCNA_00304	3.24753	3.58805	5.28067	2.55077	0.616598	3.71036	1.16613	2.54309	4.11694	4.91549	complement(318031..319308)	3.2904	-0.153292	-1.1121	0.716855	0.944629	1
CCNA_00306	98.8178	60.4282	45.1849	71.4392	124.714	67.6422	80.9864	57.1519	55.7095	32.088	complement(320335..321048)	80.1167	0.358431	1.28203	0.32245	0.79382	1
CCNA_00307	6.01358	3.19963	3.6097	4.31034	5.3283	2.69598	2.45118	3.2667	2.07689	3.64667	complement(321045..322868)	4.49231	0.5212	1.43515	0.100802	0.649821	1
CCNA_00309	267.315	68.587	57.6812	40.9739	110.007	52.537	48.4034	45.5257	44.9697	54.4819	complement(323812..324045)	108.913	1.01485	2.02069	0.007412	0.274866	1
CCNA_00310	18.6234	11.2233	14.772	19.6675	17.5114	12.3837	13.3746	15.5096	15.3796	16.1077	complement(324066..324845)	16.3595	0.0782732	1.05575	0.787909	0.964931	1
CCNA_00311	5.78663	2.66019	5.93161	4.03094	8.47962	3.55994	3.35657	4.06666	5.05605	4.02265	complement(324842..326173)	5.3778	0.326457	1.25393	0.35537	0.806941	1
CCNA_00312	4.42468	6.74038	12.6932	7.63215	5.88069	10.0481	8.15596	7.6356	16.7529	10.1115	complement(326229..326630)	10.5408	-0.497641	-1.4119	0.188576	0.727631	1
CCNA_00313	17.8196	11.7315	13.7618	14.0413	20.9563	12.476	12.8672	14.1093	13.4555	11.0051	complement(326715..328544)	15.6621	0.199345	1.14818	0.494718	0.877347	1
CCNA_00314	9.68802	6.47097	6.99291	7.20658	12.876	6.60024	10.2277	10.6211	8.59714	9.66089	complement(328587..329198)	9.14142	-0.185814	-1.13746	0.549947	0.890775	1
CCNA_00315	5.03777	6.26662	9.25216	8.52257	4.12033	8.83858	8.57175	9.79506	10.3166	9.78165	complement(329224..330753)	9.46072	-0.547252	-1.4613	0.0797339	0.605414	1
CCNA_00316	4.70561	7.71975	7.11245	5.58025	3.24285	4.64613	4.994	5.73205	7.05238	6.35434	complement(330777..331910)	5.75578	-0.0577804	-1.04086	0.864208	0.989912	1
CCNA_00318	13.8963	11.2901	11.6593	14.1821	8.7557	14.4524	8.38303	9.21606	12.2767	13.0875	333179..334138	11.9567	-0.0321048	-1.0225	0.911012	0.998993	1
CCNA_00319	4.44125	5.46454	5.24015	8.61833	2.45947	3.9466	4.46537	4.39564	8.67055	4.49801	complement(334224..334757)	5.24475	-0.0118536	-1.00825	0.976424	0.998993	1
CCNA_00320	110.896	9.2637	1.82891	6.39193	14.5928	2.60183	1.10394	6.01865	6.23579	7.52744	complement(334940..335209)	28.5946	2.35536	5.11721	0.0004515	0.0462612	1
CCNA_00321	11.4904	10.5025	11.8029	6.3176	2.54526	8.84926	9.81991	6.29859	9.38088	12.8905	complement(335240..335755)	9.44784	-0.188729	-1.13976	0.610736	0.916591	1
CCNA_00322	7.05841	11.2488	7.83821	8.21819	5.00326	6.13289	8.98921	10.6043	7.68339	9.09159	335959..336588	8.50027	-0.152657	-1.11161	0.637521	0.922711	1
CCNA_00323	51.5688	15.7559	10.7936	14.67	11.2437	13.5956	13.0301	8.55109	11.1171	14.3033	336631..337728	20.8064	0.651815	1.57114	0.0759871	0.604379	1
CCNA_00324	45.2108	4.99513	6.8136	10.0265	16.5958	7.65245	12.9875	4.32713	9.17028	7.64821	complement(337932..338390)	16.7284	0.862964	1.81877	0.0536586	0.53989	1
CCNA_00326	6.89426	7.67487	7.33692	7.06085	12.7263	7.65801	8.08699	7.69827	8.97302	6.26624	338634..339665	8.33864	0.0291702	1.02043	0.921886	0.998993	1
CCNA_00327	12.0728	9.74575	5.71019	13.5937	17.036	10.0659	13.0375	8.98712	10.7927	10.3111	complement(339828..340490)	11.6317	0.0344313	1.02415	0.918002	0.998993	1
CCNA_00329	3.23993	12.9084	22.1868	19.9093	5.74144	17.5944	19.5451	22.0355	17.634	17.837	341277..341825	18.9292	-0.589166	-1.50438	0.137113	0.699217	1
CCNA_00331	10.1552	10.1608	7.37349	6.06349	4.49897	6.0161	7.4614	5.70939	6.37751	4.86863	342674..343432	7.65038	0.277731	1.21229	0.396907	0.8325	1
CCNA_00332	109.358	165.512	162.895	188.917	139.702	234.946	265.828	161.3	185.203	191.608	343435..344109	207.777	-0.490295	-1.40473	0.189166	0.727631	1
CCNA_00333	3.93839	3.52424	3.9759	3.47387	3.17235	2.12106	5.03972	4.36134	4.82935	7.14066	complement(344130..344957)	4.69843	-0.427041	-1.34447	0.261335	0.774629	1
CCNA_00334	70.2822	37.897	58.6817	36.2323	55.2499	43.5146	41.4419	46.6687	55.897	62.2469	345020..345580	51.6686	-0.0387602	-1.02723	0.897791	0.996733	1
CCNA_00335	14.2135	16.6556	17.6628	14.8853	8.99558	18.4445	13.6102	18.1384	21.6224	15.1861	345618..346055	17.4003	-0.311387	-1.2409	0.32695	0.794049	1
CCNA_00336	4.28755	9.61779	10.2026	11.3576	3.43715	14.8772	10.4692	10.943	14.9292	11.0706	346066..347517	12.4578	-0.717694	-1.64455	0.0314417	0.456526	1
CCNA_00337	5.83734	4.39733	2.54659	2.42731	8.49709	1.97608	4.61139	4.82508	4.44004	3.89799	347595..348305	4.74113	0.14112	1.10276	0.732139	0.948553	1
CCNA_00338	4.23316	5.85957	6.75744	5.04851	5.50894	5.40743	4.38915	4.35083	5.72866	7.8325	348479..350719	5.54171	-0.0676998	-1.04804	0.82456	0.980305	1
CCNA_00339	74.9575	25.9553	26.7463	25.4803	42.6815	24.5367	34.1743	22.8955	22.8516	26.6555	350788..352104	39.1642	0.472515	1.38753	0.177405	0.724334	1
CCNA_00340	29.1512	16.1536	9.87614	9.74769	13.3524	12.001	10.6806	7.82424	13.5044	11.7018	352434..353633	15.6562	0.381481	1.30268	0.231034	0.756229	1
CCNA_00344	2.55563	2.99473	1.41899	3.8572	4.52881	6.56066	3.42601	7.26389	6.65241	6.90212	358988..359335	6.16102	-1.1501	-2.21929	0.0175115	0.378489	1
CCNA_00345	39.1006	13.7456	15.1971	19.0838	16.3776	15.7935	19.6564	16.2374	14.8885	14.1786	complement(359343..360176)	20.7009	0.242604	1.18313	0.396037	0.8325	1
CCNA_00346	24.9689	13.6873	17.1534	13.5503	18.1864	16.547	17.02	16.3676	12.6185	12.2649	360419..361819	17.5093	0.134588	1.09778	0.6345	0.922486	1
CCNA_00347	6.58785	3.47389	8.23012	0	0	4.87844	0	7.02176	8.18448	9.23823	361909..362088	5.86458	-0.737413	-1.66718	0.306708	0.789289	1
CCNA_00348	6.50896	6.76056	6.40668	5.64556	6.02937	6.66038	6.24683	7.74856	7.35133	8.02121	complement(362218..364221)	7.20566	-0.280414	-1.21454	0.326169	0.79382	1
CCNA_00349	0.323993	1.13898	1.07936	2.30528	1.43536	2.4952	0.977256	2.36799	3.22012	1.81736	complement(364395..365309)	2.17559	-0.825885	-1.77262	0.0997311	0.646669	1
CCNA_00350	2.61192	1.22428	2.65877	1.40791	1.15714	1.03156	1.31305	2.38625	1.23617	3.25576	complement(365306..365986)	1.84456	-0.115023	-1.08299	0.82362	0.979472	1
CCNA_00351	1.37247	3.2809	3.04819	2.21942	4.49946	2.68314	3.31181	3.09292	2.14355	2.30956	366112..368271	2.88409	0.0465173	1.03277	0.892954	0.99606	1
CCNA_00352	53.1238	31.6046	30.3215	43.7342	54.6408	40.2746	40.7129	30.0932	37.1862	43.76	complement(368358..369155)	42.685	0.0588431	1.04163	0.837512	0.984246	1
CCNA_00353	23.2831	26.4587	22.8489	29.9457	27.5864	32.0774	41.6472	24.0746	26.9079	11.6427	369280..370374	27.27	-0.130164	-1.09442	0.672676	0.927711	1
CCNA_00354	42.7094	45.926	39.2907	52.5438	41.1815	55.8126	71.9898	40.0393	46.6694	52.9763	370445..371152	53.4975	-0.319473	-1.24787	0.301733	0.787346	1
CCNA_00355	5.23853	14.2304	12.6922	16.6344	8.22825	13.2599	12.6886	11.7472	9.63543	13.2081	371323..372567	12.1079	-0.126042	-1.0913	0.688674	0.935624	1
CCNA_00356	5.03777	30.2433	38.73	32.5863	4.80705	28.2375	15.585	40.3604	39.8907	40.8173	372638..373402	32.9782	-0.608793	-1.52498	0.174421	0.719777	1
CCNA_00357	9.75722	2.91923	4.49544	5.9085	5.15041	3.68958	3.7571	4.8048	4.12663	4.39916	373511..374938	5.64616	0.307152	1.23726	0.347306	0.803495	1
CCNA_00358	57.8446	118.136	132.676	139.642	84.2011	147.475	114.933	124.148	127.106	121.03	complement(374976..375836)	126.938	-0.306015	-1.23629	0.425451	0.841024	1
CCNA_00359	1.11449	4.17911	7.83821	6.96864	2.30413	7.04256	3.36162	4.29904	6.32956	8.10371	375919..376716	5.8273	-0.386047	-1.30681	0.344941	0.803495	1
CCNA_00360	4.32536	5.61437	3.87952	8.82387	4.42207	7.88434	7.35959	6.89004	5.6689	6.22103	376916..377806	6.80478	-0.37538	-1.29718	0.21984	0.741695	1
CCNA_00361	9.38144	13.4118	14.4114	15.9798	10.529	17.2289	16.035	14.0943	15.7621	18.5154	complement(377803..378750)	16.3272	-0.381165	-1.30239	0.180044	0.727631	1
CCNA_00362	7.31984	2.57325	3.72557	2.76194	1.62143	6.86595	2.4532	0.743043	3.89737	3.80174	complement(378802..379287)	3.6004	-0.097353	-1.06981	0.851513	0.987462	1
CCNA_00363	3.43382	2.41429	7.83821	4.68906	1.35223	2.93836	1.15082	3.02094	4.60462	2.85351	complement(379324..380100)	3.94552	0.386447	1.30717	0.40306	0.8325	1
CCNA_00364	9.74641	4.75875	5.26126	7.70533	10.075	4.81161	5.71628	5.11173	4.42058	7.93053	complement(380179..381273)	7.50936	0.306324	1.23655	0.354198	0.806898	1
CCNA_00365	4.94089	5.45897	5.35611	5.93536	6.25407	7.8055	4.25805	5.58875	6.51418	8.06512	complement(381396..382655)	6.44632	-0.308521	-1.23844	0.297357	0.784317	1
CCNA_00366	5.22056	1.57308	2.07047	2.17084	2.31283	4.1973	2.62446	5.90509	3.17672	4.18335	383009..383803	4.01738	-0.782119	-1.71965	0.0600821	0.569455	1
CCNA_00367	24.56	20.7214	16.8453	17.0078	7.16841	19.3426	11.0394	16.3665	17.4356	13.146	383800..384825	17.2606	0.0666068	1.04725	0.843018	0.987031	1
CCNA_00368	16.2925	5.97658	6.68635	6.64394	8.78708	9.02249	8.19051	5.17733	5.78319	6.40164	384831..385667	8.8773	0.240028	1.18102	0.47524	0.864783	1
CCNA_00369	17.3721	7.614	5.8876	11.091	7.39637	8.82129	8.61979	9.89367	8.32863	8.71796	385817..387130	9.87221	0.0242769	1.01697	0.938677	0.998993	1
CCNA_00370	11.6256	14.7129	13.2327	12.4079	4.12033	13.0857	8.18213	20.1802	15.6812	24.273	complement(387576..388085)	16.2804	-0.609831	-1.52608	0.104305	0.653371	1
CCNA_00371	0	0.390325	3.69893	2.51368	0	0.657767	0	4.39564	0.394116	2.76801	complement(388096..388629)	1.64311	-0.34509	-1.27023	0.684072	0.935532	1
CCNA_00372	300.406	59.2877	41.6993	57.9535	51.3668	42.9303	67.561	39.3218	23.3842	41.88	complement(388756..388980)	102.143	1.103	2.148	0.007144	0.274866	1
CCNA_00373	61.0803	18.0533	14.9049	15.6023	39.6419	21.2039	14.864	16.5868	18.781	16.7306	complement(389030..389791)	29.8566	0.633511	1.55134	0.0762065	0.604379	1
CCNA_00374	2.33428	5.47069	3.02419	3.52311	0	4.60955	0.782318	3.31737	1.65715	4.84946	complement(389797..390177)	3.04317	-0.155219	-1.11359	0.787521	0.964914	1
CCNA_00375	22.8041	18.7056	17.7264	18.1924	14.1438	11.2579	20.6351	18.5189	11.872	15.1602	390599..390988	18.3145	0.19646	1.14588	0.536855	0.882162	1
CCNA_00376	31.1656	20.8433	12.0286	29.747	27.2774	20.9398	23.3101	13.6577	15.3796	16.5814	391059..391838	24.2124	0.339803	1.26558	0.259198	0.771693	1
CCNA_00378	10.2225	24.6424	23.2443	28.0237	20.7031	28.2613	23.0032	33.5028	24.8817	27.0017	complement(395418..396026)	27.3302	-0.408887	-1.32766	0.190932	0.727631	1
CCNA_00379	18.7995	6.4394	6.9588	6.23602	7.26082	4.56907	8.7238	3.8167	7.52858	9.31333	complement(396026..396640)	9.13891	0.318873	1.24736	0.393225	0.8325	1
CCNA_00380	0	3.0879	0.914457	7.45725	0.486428	5.5289	11.0394	3.34369	3.50763	3.42157	complement(396879..397418)	5.36823	-1.16083	-2.23585	0.0503931	0.530038	1
CCNA_00381	5.64673	36.1284	35.7422	27.5766	5.00326	32.6158	17.5999	40.239	25.8563	57.189	397466..398515	34.7	-0.68875	-1.61189	0.121534	0.676136	1
CCNA_00383	1.86449	7.20996	5.9526	3.61807	4.13005	4.97048	4.68653	5.11017	6.61818	5.81021	complement(399852..400487)	5.43911	-0.26118	-1.19846	0.492404	0.87703	1
CCNA_00384	10.1435	170.934	94.6554	159.798	46.0979	191.519	139.162	128.743	113.824	133.373	400574..401479	141.324	-0.591514	-1.50683	0.236646	0.758112	1
CCNA_00385	57.07	33.0995	27.9886	34.0424	61.9785	30.5204	29.918	28.5379	28.534	28.2337	401527..402861	42.8358	0.458731	1.37433	0.18421	0.727631	1
CCNA_00386	11.0918	21.9777	18.7557	26.7417	15.6352	22.9984	25.3455	18.4244	20.4015	22.6242	complement(402858..403445)	21.9588	-0.246518	-1.18634	0.422662	0.841024	1
CCNA_00387	2.10251	40.8983	27.6283	43.5195	14.9033	24.496	21.1392	19.6353	17.4138	27.0813	403575..403997	25.8104	0.198899	1.14782	0.642048	0.923184	1
CCNA_00388	0	4.72638	5.22547	6.08755	2.68032	7.16832	4.05528	4.91318	4.53368	5.23709	complement(404125..405006)	5.18151	-0.476168	-1.39104	0.257014	0.771265	1
CCNA_00389	0	0.526347	0.207831	0.726355	0.994966	1.77398	1.50537	1.59585	0.53146	0.933154	complement(405104..405895)	1.26796	-1.38747	-2.61619	0.0472099	0.526734	1
CCNA_00390	23.4235	2.0586	4.19973	2.84086	4.53999	3.32457	4.90639	2.52635	1.73216	3.95381	405999..407213	7.41253	1.02298	2.03211	0.0348228	0.477189	1
CCNA_00391	5.84406	0.747073	1.76992	1.71826	3.29515	1.25895	1.06833	2.58867	3.01732	1.32448	407210..407767	2.67489	0.308569	1.23848	0.580081	0.90397	1
CCNA_00392	74.1689	24.5124	16.8918	23.7004	19.479	16.1811	12.7263	19.6113	18.9176	22.8361	407848..409182	31.7505	0.675358	1.59699	0.0518638	0.539093	1
CCNA_00393	8.6979	9.34298	9.92712	6.8764	6.42227	10.7349	13.3606	8.38785	5.83176	11.1431	complement(409326..410552)	9.89165	-0.297944	-1.22939	0.32328	0.79382	1
CCNA_00394	0.844596	4.15679	5.15848	3.27791	3.74175	6.50458	5.94428	5.14414	1.19919	3.15837	complement(410549..410899)	4.39011	-0.320215	-1.24852	0.547418	0.88844	1
CCNA_00395	6.28991	4.42237	7.53623	4.81803	12.3196	5.00101	2.82919	5.444	5.05287	5.88028	411052..412842	7.07722	0.457301	1.37297	0.168931	0.719432	1
CCNA_00396	13.1174	22.1345	16.9943	20.0808	14.722	23.5719	25.498	20.2397	22.9703	28.3415	complement(412933..413610)	24.1243	-0.501818	-1.416	0.0745968	0.603243	1
CCNA_00397	0.385255	1.48978	3.52948	1.99358	0.853382	3.42347	1.54939	2.22913	2.735	3.00137	413741..415279	2.58767	-0.630715	-1.54833	0.15121	0.711814	1
CCNA_00398	39.2653	19.6317	30.0378	24.834	17.5887	26.6214	19.3006	28.4325	28.6495	33.5812	complement(415406..416764)	27.3171	-0.150688	-1.1101	0.653324	0.925522	1
CCNA_00399	8.36981	3.03728	2.24867	4.01678	6.69835	3.67882	7.32942	3.61777	3.64181	6.22613	416919..418016	4.89879	-0.121306	-1.08772	0.741666	0.949874	1
CCNA_00400	0	0	1.4829	1.29566	0.591601	0.791098	0.671314	1.22	0	0.832273	418061..418504	0.702936	0.0250099	1.01749	0.977325	0.998993	1
CCNA_00401	2.30703	1.62205	2.13492	1.24357	1.36275	0	0	0.936755	1.09187	0.718928	418501..419271	1.73406	1.46886	2.76803	0.0255537	0.424337	1
CCNA_00402	15.6402	30.9901	18.5523	33.1093	15.1178	21.058	17.1547	19.9178	16.1503	13.7355	419275..419691	22.6819	0.305806	1.23611	0.323075	0.79382	1
CCNA_00403	3.35492	3.21656	3.04819	2.76194	4.3238	3.61366	3.67979	2.41489	3.24781	2.09096	419728..420699	3.34108	0.0842806	1.06016	0.809896	0.974212	1
CCNA_00404	80.4331	32.7192	19.1398	24.1555	51.9233	30.6321	38.702	34.9921	32.6291	19.3358	420699..421214	41.6742	0.291459	1.22388	0.421111	0.841024	1
CCNA_00405	16.2393	15.7904	12.4699	14.5271	20.5116	20.6737	27.444	15.1518	14.9626	13.782	421211..422068	18.4028	-0.270448	-1.20618	0.347054	0.803495	1
CCNA_00407	21.6164	31.6992	32.2346	37.1531	18.0586	35.1248	35.395	31.2217	35.5148	36.1831	422528..423007	34.6879	-0.334315	-1.26078	0.261808	0.774629	1
CCNA_00408	60.5055	22.5023	14.3978	31.5819	60.0272	28.7862	35.4669	17.9279	19.2381	17.4718	complement(423040..424308)	37.8029	0.570806	1.48535	0.141868	0.699217	1
CCNA_00409	0	0	0	0	0	0	0	0	0	0	424406..424450	0	NaN	NaN	NaN	NaN	NaN
CCNA_00410	2.23317	1.96265	1.23994	2.52788	0	0.330742	0	0.340037	2.37806	1.04387	424513..425043	1.59273	0.830847	1.77873	0.26959	0.779053	1
CCNA_00411	3.67939	16.9999	12.5495	16.3198	2.79437	19.3062	12.6835	19.2085	14.5529	10.4831	425076..425639	15.2468	-0.582529	-1.49747	0.151125	0.711814	1
CCNA_00412	1.82153	2.56139	1.76992	2.35647	1.61395	1.88843	0.915709	1.66414	1.61642	2.55435	425636..426286	2.02465	0.119441	1.08631	0.80254	0.971271	1
CCNA_00413	8.74703	2.65944	1.18136	3.21125	3.97986	4.90178	3.32766	1.72784	2.68527	2.50478	426379..427632	3.95579	0.24421	1.18444	0.549139	0.889819	1
CCNA_00414	0.844596	2.0784	3.28267	2.18527	1.12253	1.75123	0.849183	2.82928	1.79879	2.10558	427653..428354	1.90269	0.0175467	1.01224	0.972841	0.998993	1
CCNA_00415	1.82996	3.00213	4.2336	3.15651	1.89166	1.98751	0.613299	3.52945	2.59825	2.47113	complement(428613..429584)	2.82277	0.259784	1.1973	0.549	0.889819	1
CCNA_00416	132.995	43.8807	37.1283	49.5014	74.3905	61.6224	71.7145	43.4429	36.9225	31.4887	complement(429725..430123)	67.5793	0.353353	1.27753	0.291968	0.782733	1
CCNA_00417	72.5195	26.8946	15.4868	18.0417	34.5991	12.2748	11.2174	23.298	17.5382	16.8871	complement(430127..430498)	33.5084	0.887253	1.84965	0.0192378	0.390977	1
CCNA_00419	2.20822	6.2103	3.98479	2.49964	7.33718	9.81138	6.10558	3.36237	5.09489	4.12882	430733..431269	5.70061	-0.404009	-1.32318	0.343502	0.803495	1
CCNA_00420	1.61116	3.39837	1.78916	2.7791	1.90341	1.5908	0	3.92521	1.52506	2.00831	complement(431334..431885)	2.29624	0.182362	1.13474	0.741507	0.949874	1
CCNA_00421	0.731984	2.57325	1.21928	2.36738	0.64857	2.16819	0.735959	2.67496	0	1.36863	complement(431882..432286)	1.50809	0.0251519	1.01759	0.971138	0.998993	1
CCNA_00422	1.57479	6.36649	8.30662	4.32919	0	3.73171	1.97917	7.91297	4.75138	7.85188	complement(432336..433088)	5.24542	-0.380251	-1.30157	0.459788	0.854477	1
CCNA_00423	1.25883	13.7185	17.8232	7.73545	3.90381	8.94898	1.89849	11.1173	9.83031	9.80703	433404..433874	8.88796	0.0698724	1.04962	0.88634	0.994838	1
CCNA_00424	16.2638	15.7772	9.94472	18.7763	18.4234	17.0745	22.9757	13.2912	12.2767	15.0121	434121..435560	16.1261	-0.0957686	-1.06863	0.739666	0.949874	1
CCNA_00425	109.085	58.6501	46.6729	65.1644	60.835	60.4419	69.032	52.7609	59.2198	63.9877	complement(435633..436094)	68.0814	0.0524331	1.03701	0.848899	0.987362	1
CCNA_00426	7.73357	1.20831	0.477108	0	3.04546	1.52716	3.45581	0	1.22005	0.535549	436545..436889	2.49289	0.749189	1.68085	0.383537	0.82658	1
CCNA_00427	1.56854	3.30847	0	0	0	1.85845	1.57705	0.955341	0	0	436958..437146	0.9754	0.0330826	1.0232	0.977079	0.998993	1
CCNA_00428	14.5797	2.27796	3.59786	0	0	0	1.62876	7.89331	3.45013	1.00964	437146..437328	4.0911	0.286646	1.2198	0.750816	0.952215	1
CCNA_00429	0	4.9627	7.83821	1.14142	0	9.40842	0	7.52331	5.0109	3.29937	437383..437550	5.0484	-0.781033	-1.71836	0.320769	0.79382	1
CCNA_00430	1.59384	2.24122	2.65488	4.12382	2.82442	3.77686	3.20498	6.79525	11.3149	8.94022	complement(437556..437741)	6.80645	-1.34475	-2.53986	0.0287454	0.445543	1
CCNA_00431	250.66	157.596	199.396	190.199	360.906	211.32	220.518	242.214	254.945	178.756	437761..437883	231.751	-0.0259952	-1.01818	0.932166	0.998993	1
CCNA_00432	0.598896	4.63185	5.98554	4.26128	4.24519	5.32193	6.02148	10.5782	8.92852	9.33154	complement(438156..438650)	8.03634	-1.02303	-2.03219	0.0103718	0.316186	1
CCNA_00433	1.14904	0	0	0	3.05431	0	0	2.79937	3.26291	0	438748..439005	1.21246	-0.758041	-1.69119	0.518307	0.881341	1
CCNA_00434	2.53379	2.22685	1.05514	1.63896	0	1.31343	1.59222	1.35034	2.69818	1.97398	439068..440003	1.78563	-0.330666	-1.25759	0.526691	0.881341	1
CCNA_00435	11.0251	19.2356	19.4983	20.7341	7.23611	21.8925	21.7594	20.0207	18.4078	13.9973	440156..441607	19.2156	-0.356749	-1.28054	0.274046	0.779053	1
CCNA_00436	5.41821	10.7028	9.02519	10.0135	5.94382	8.86526	9.07938	8.01439	10.0741	8.52265	441717..442865	8.91116	-0.140227	-1.10208	0.646765	0.924535	1
CCNA_00437	5.32661	5.81134	5.50714	8.07901	3.41765	6.74639	7.57162	7.71909	6.65016	5.72381	443064..444677	6.88221	-0.333847	-1.26037	0.276291	0.779053	1
CCNA_00438	25.6546	4.67639	5.27571	10.4483	11.7865	5.62897	7.64265	0.578716	10.7927	5.92194	complement(444889..445200)	11.5683	0.795688	1.73591	0.11444	0.670993	1
CCNA_00439	20.6726	9.17437	8.30338	10.5268	24.4224	10.8571	13.8565	8.30466	8.95123	10.6911	445497..447518	14.6199	0.381742	1.30291	0.225229	0.748121	1
CCNA_00440	72.0546	20.2644	21.7184	23.3039	51.0749	26.2216	20.6988	19.4352	18.2689	23.7371	447518..447805	37.6832	0.66707	1.58785	0.0534811	0.53989	1
CCNA_00443	15.2027	5.34444	11.6066	15.5701	15.7154	15.7611	11.464	5.78716	8.09454	12.2387	450529..450996	12.6878	0.166979	1.12271	0.621118	0.920775	1
CCNA_00444	36.3004	14.1791	7.83821	17.1756	31.5682	15.9296	23.6558	9.62165	14.5555	11.1026	450996..451877	21.4123	0.4155	1.33376	0.244967	0.765054	1
CCNA_00445	36.3764	15.3052	15.4265	19.4537	22.3334	13.7445	15.5511	16.7475	13.0138	24.4568	451877..452911	21.779	0.268091	1.20421	0.398483	0.8325	1
CCNA_00446	11.4021	8.55111	4.64263	4.42518	6.06164	9.45666	6.87838	4.62973	3.23782	8.05384	452915..453304	7.01652	-0.0200733	-1.01401	0.960904	0.998993	1
CCNA_00451	15.3976	16.787	14.9884	17.7764	14.2474	14.7219	16.951	15.3137	18.6797	16.0955	455598..458639	16.3524	-0.10816	-1.07785	0.739042	0.949874	1
CCNA_00452	1.82513	1.83319	2.3163	4.72227	6.23757	2.62586	3.93223	2.54085	4.07219	4.71255	complement(458721..459857)	3.57674	-0.147744	-1.10784	0.695276	0.937808	1
CCNA_00453	0.814432	6.68056	7.83821	9.13132	1.92433	6.43311	6.82379	6.44855	9.2509	7.78312	complement(459857..460948)	7.34789	-0.500738	-1.41494	0.242713	0.76268	1
CCNA_00454	1.45857	2.82013	1.21478	1.17932	1.93853	2.59223	1.46649	1.55463	1.81206	2.04536	complement(460977..461789)	1.89416	-0.254902	-1.19325	0.597419	0.90994	1
CCNA_00456	10.6901	14.2989	13.2464	13.1549	10.3959	15.1373	14.9425	15.0069	13.975	13.8127	464819..467092	14.5749	-0.288636	-1.22149	0.288544	0.781233	1
CCNA_00457	8.22516	7.6564	9.90573	11.3901	4.00319	8.57873	6.87211	9.17262	6.00369	7.14798	467106..469664	8.23611	0.052241	1.03687	0.871091	0.991045	1
CCNA_00458	1.01352	4.98815	4.12678	2.4038	0	1.30092	4.24591	3.08649	3.1179	1.36863	469661..471415	2.62397	-0.0901199	-1.06446	0.86487	0.989912	1
CCNA_00460	0	0	0	0	0	0	0	0	0	0	473245..473400	0	NaN	NaN	NaN	NaN	NaN
CCNA_00464	0	0	0	0	0	0	0	0	0	0	477514..477678	0	NaN	NaN	NaN	NaN	NaN
CCNA_00465	0	0	0	0	0	0	0	0	0	0	477921..479033	0	NaN	NaN	NaN	NaN	NaN
CCNA_00466	0	0	0	0	0	0	0	0	0	0	479191..480435	0	NaN	NaN	NaN	NaN	NaN
CCNA_00467	0	0	0	0	0	0	0	0	0	0	480439..481710	0	NaN	NaN	NaN	NaN	NaN
CCNA_00468	0	0	0	0	0	0	0	0	0	0	complement(481820..481933)	0	NaN	NaN	NaN	NaN	NaN
CCNA_00469	0	0	0	0	0	0	0	0	0	0	complement(482231..483454)	0	NaN	NaN	NaN	NaN	NaN
CCNA_00470	0	0	0	0	0	0	0	0	0	0	complement(484789..486132)	0	NaN	NaN	NaN	NaN	NaN
CCNA_00471	0	0	0	0	0	0	0	0	0	0	complement(486159..487127)	0	NaN	NaN	NaN	NaN	NaN
CCNA_00472	0.275258	0	0	0	0	0	0	0	0	0.34311	complement(487093..488169)	0.0686219	-0.6657	-1.58634	0.663548	0.926901	1
CCNA_00473	0	0	0	0	0	0	0	0	0	0	complement(488274..488768)	0	NaN	NaN	NaN	NaN	NaN
CCNA_00476	0	0	0	0	0	0	0	0	0	0	complement(493326..493709)	0	NaN	NaN	NaN	NaN	NaN
CCNA_00477	0	0	0	0	0	0	0	0	0	0	complement(494090..494284)	0	NaN	NaN	NaN	NaN	NaN
CCNA_00478	0	0	0	0	0	0	0	0	0	0	complement(494406..495143)	0	NaN	NaN	NaN	NaN	NaN
CCNA_00479	0	0	0	0	0	0	0	0	0	0.570261	495332..495655	0.114052	-1.35108	-2.55103	0.529345	0.881341	1
CCNA_00480	0	0	0	0	0	0	0	0	0	0	complement(495724..497022)	0	NaN	NaN	NaN	NaN	NaN
CCNA_00481	0	0	0	0	0	0	0	0	0	0	497352..497597	0	NaN	NaN	NaN	NaN	NaN
CCNA_00482	0	0	0	0	0	0	0	0	0	0	497584..498855	0	NaN	NaN	NaN	NaN	NaN
CCNA_00483	5.60668	4.9275	5.0587	3.85329	6.83069	2.69871	3.87553	2.3477	3.73152	5.02315	complement(499379..500224)	5.25537	0.490319	1.40476	0.161421	0.718816	1
CCNA_00484	8.86826	7.12593	10.317	9.28741	6.73515	4.00282	5.94428	3.34369	11.0925	6.84313	complement(500314..501015)	8.46674	0.391269	1.31155	0.268691	0.779053	1
CCNA_00485	2.88098	1.21535	4.47897	2.4226	4.33956	2.04809	1.44831	1.93018	2.45432	2.87292	complement(501114..502142)	3.06749	0.427417	1.34482	0.304537	0.788784	1
CCNA_00486	7.50063	17.5787	16.9891	18.6367	9.59962	20.3131	17.2374	16.9682	18.7637	17.586	502235..504724	18.1737	-0.417638	-1.33574	0.233636	0.75798	1
CCNA_00487	10.6688	22.3805	14.8579	19.9111	15.3418	14.2986	29.8942	12.3569	13.1614	12.6447	504911..506605	16.632	-0.0284571	-1.01992	0.930316	0.998993	1
CCNA_00488	63.3569	38.2294	30.9778	37.3117	63.2589	43.6959	64.6517	27.0695	28.8666	27.6999	complement(506715..507341)	46.6269	0.20527	1.1529	0.524356	0.881341	1
CCNA_00489	8.4701	1.48881	3.52719	0.913132	2.50163	0.836304	0	1.28971	1.50327	1.31975	complement(507328..507747)	3.38017	1.4831	2.7955	0.0348041	0.477189	1
CCNA_00490	28.1379	23.5518	20.0871	26.2177	22.8539	24.4087	28.2907	21.0143	18.7866	13.1527	507838..508722	24.1697	0.124568	1.09018	0.671783	0.927593	1
CCNA_00491	65.8785	91.9847	42.7605	80.4242	20.9643	69.2601	70.9008	48.6013	42.8162	43.9503	complement(508870..509508)	60.4025	0.0602068	1.04262	0.871634	0.991045	1
CCNA_00492	16.1857	11.8292	9.34165	15.1533	11.6994	12.6167	18.2007	10.5067	14.212	12.0787	509704..511095	13.5229	-0.141434	-1.103	0.645884	0.924204	1
CCNA_00493	1.28335	0.451154	1.06885	2.0753	0	1.14041	1.93548	3.12657	0.455537	1.59969	511098..511559	1.65154	-0.743041	-1.6737	0.295109	0.783313	1
CCNA_00494	107.16	23.46	13.895	26.5638	112.005	28.8905	43.8708	17.587	17.3104	14.3972	511566..512027	56.6166	1.10936	2.1575	0.0134011	0.355477	1
CCNA_00495	4.65025	0.817386	0	2.25597	0	3.4436	0	0.708076	0	0.724567	512080..512334	1.54472	0.325023	1.25268	0.748509	0.952215	1
CCNA_00496	15.5156	13.0271	10.9568	15.5901	15.7496	14.7246	17.1144	12.2942	12.7259	14.2704	512331..514298	14.2259	-0.0801607	-1.05714	0.773657	0.961008	1
CCNA_00497	8.31476	5.39633	5.32694	5.99889	5.10041	7.3887	6.43071	6.23291	5.67578	6.17875	514298..515224	6.38137	-0.184609	-1.13651	0.527884	0.881341	1
CCNA_00498	145.756	203.223	315.488	249.285	247.348	223.92	149.032	338.549	331.471	264.829	complement(515285..515404)	261.56	-0.240897	-1.18173	0.4414	0.848527	1
CCNA_00499	4.04991	1.70847	1.79893	1.04786	3.5884	1.91939	1.62876	4.93332	2.87511	3.02893	complement(515480..515845)	2.8771	-0.467833	-1.38303	0.416083	0.840597	1
CCNA_00500	0.988178	3.47389	4.75518	3.40903	4.08599	1.75624	2.64945	4.21305	2.10458	4.72176	complement(515842..516741)	3.34245	0.076524	1.05447	0.855349	0.987462	1
CCNA_00501	2.99983	2.23321	2.44944	4.22324	2.18892	1.88168	3.19353	2.36447	3.88345	2.0896	complement(516738..518417)	2.81893	0.0320569	1.02247	0.926743	0.998993	1
CCNA_00502	5.62378	17.7931	12.9362	19.2277	9.60991	25.4631	27.4638	17.6156	18.5363	21.5308	518474..519211	22.1219	-0.788306	-1.72705	0.0177818	0.378937	1
CCNA_00503	40.6484	37.449	42.0261	53.0394	67.0649	57.7109	55.6667	39.6975	44.7783	55.9098	519310..519732	50.7526	-0.147604	-1.10773	0.616781	0.920185	1
CCNA_00504	47.8151	23.7569	18.7611	28.4544	37.8472	6.79834	21.1529	21.3565	13.5779	21.8539	complement(519729..520193)	31.3269	0.77244	1.70816	0.0246777	0.419699	1
CCNA_00505	15.0375	32.4733	23.259	23.2749	14.7514	19.7259	23.2187	26.8222	25.926	28.1163	520398..520949	24.7618	-0.235908	-1.17765	0.463823	0.855182	1
CCNA_00506	118.952	35.3084	38.4201	35.9265	77.0993	36.4683	34.6693	31.9961	32.2012	47.5974	520955..522235	61.1412	0.631476	1.54915	0.0954024	0.636703	1
CCNA_00507	79.5448	41.1446	21.7913	44.6528	46.2624	40.6882	38.0506	31.5872	31.5936	27.9549	522241..523086	46.6792	0.347555	1.2724	0.277753	0.779053	1
CCNA_00508	8.80934	31.5074	34.239	44.8426	5.09052	36.0778	23.1057	36.3918	37.2516	41.0588	complement(523154..523927)	34.7771	-0.533951	-1.44789	0.178406	0.725163	1
CCNA_00509	0	1.95162	3.69893	1.79548	4.91893	0.328883	1.11634	2.36688	5.51763	2.42201	complement(523993..524526)	2.47299	0.0274648	1.01922	0.965622	0.998993	1
CCNA_00510	2.62348	3.68909	3.15609	4.24243	3.8742	1.29516	3.95659	3.99468	4.65615	1.36257	complement(524523..525200)	3.51706	0.174645	1.12869	0.691013	0.936248	1
CCNA_00511	21.766	4.59104	5.80096	5.63165	22.3714	7.99462	8.31601	4.50736	9.27128	10.3099	complement(525200..525880)	12.0322	0.45908	1.37466	0.272557	0.779053	1
CCNA_00512	5.65442	5.30076	2.84055	2.96084	3.10147	2.07367	5.14369	4.26389	2.10267	4.19538	complement(525945..527045)	3.97161	0.078909	1.05622	0.825465	0.980641	1
CCNA_00514	3.92417	23.0757	14.6577	23.0755	9.16661	19.232	11.8364	18.2515	20.0074	23.568	528078..528908	18.5791	-0.377991	-1.29953	0.298751	0.784317	1
CCNA_00515	126.761	12.7703	10.0144	11.9951	23.9713	12.7918	12.0043	9.97951	8.92688	13.6159	529324..531657	37.1024	1.53024	2.88835	0.002304	0.132574	1
CCNA_00516	39.1318	124.504	83.179	107.896	30.4698	107.013	69.9455	106.169	70.1527	94.8458	complement(531683..532432)	89.6253	-0.27503	-1.21002	0.488212	0.875818	1
CCNA_00517	8.63456	8.43177	7.9904	8.37777	5.10041	6.25198	5.78764	7.88852	10.2164	6.87635	complement(532435..533052)	7.70698	-0.001189	-1.00082	0.997111	0.998993	1
CCNA_00518	65.8785	60.0035	49.3253	58.4312	40.683	64.4545	63.7273	55.3229	51.0201	82.4286	complement(533140..533733)	63.3907	-0.283998	-1.21756	0.35939	0.809098	1
CCNA_00519	56.1527	22.8367	22.6194	17.6268	40.2421	25.4385	24.9078	22.8005	23.6448	23.3315	complement(533891..534967)	31.8955	0.302111	1.23295	0.318815	0.793638	1
CCNA_00520	10.4185	9.98882	10.5177	11.8445	5.31496	10.2868	5.39625	10.9605	11.4306	14.9543	complement(535198..536136)	10.6057	-0.223872	-1.16786	0.508424	0.881341	1
CCNA_00521	7.05841	10.7525	7.18502	5.3266	1.04234	0.69692	7.09674	2.14952	4.17575	0.733193	complement(536277..536528)	6.27298	1.12771	2.18511	0.0666236	0.586216	1
CCNA_00523	10.5607	5.03846	6.28253	6.83106	11.3624	4.02192	7.96352	3.21607	5.35517	7.05208	complement(536853..537638)	8.01502	0.461708	1.37717	0.184049	0.727631	1
CCNA_00524	3.16217	1.85274	4.38939	4.26128	1.86788	1.5611	1.85462	3.37044	2.24489	1.80659	complement(537635..538759)	3.10669	0.456497	1.37221	0.249167	0.767425	1
CCNA_00525	15.002	12.3822	15.5729	17.7202	12.1366	15.2632	13.7719	13.5072	21.7635	13.0087	complement(538746..539654)	15.4629	-0.149503	-1.10919	0.607948	0.916413	1
CCNA_00526	0	0	1.27599	2.97299	3.05431	4.08427	0	0.699843	0	1.43228	539769..540026	1.46066	0.0912207	1.06527	0.922677	0.998993	1
CCNA_00527	9.94025	3.28889	0.973978	3.40398	1.55427	1.73199	1.17579	1.0684	1.24531	1.09328	540157..540663	3.83227	1.37967	2.60209	0.0234428	0.419699	1
CCNA_00528	0.378612	1.06479	1.68176	1.71431	0	0	0	0.461199	0.806352	1.65179	540844..541626	0.967895	0.664341	1.58484	0.408524	0.83659	1
CCNA_00529	2.76027	3.88144	2.14565	4.64218	0.97829	2.28932	2.22021	2.35366	3.52723	7.22543	541695..542231	3.52317	-0.35037	-1.27489	0.49128	0.87703	1
CCNA_00530	7.99681	40.9638	39.6441	44.3371	18.7261	44.3289	35.0325	38.6168	34.0626	39.5161	542581..543099	38.3114	-0.372939	-1.29499	0.312887	0.790776	1
CCNA_00531	86.4656	10.8559	9.00169	11.9849	31.4658	18.2941	8.53827	9.40414	8.22102	7.69852	543145..543528	29.9548	1.36145	2.56944	0.004254	0.197454	1
CCNA_00532	4.65808	2.80718	1.84739	5.16519	3.83246	3.54795	2.34169	1.82383	1.88963	2.48841	543952..544842	3.66206	0.460425	1.37595	0.247182	0.767425	1
CCNA_00534	1.15915	1.62998	3.37893	4.49872	2.05412	3.4335	3.20498	1.9415	3.49735	2.52855	546314..547336	2.92118	-0.179824	-1.13275	0.655029	0.925741	1
CCNA_00535	156.617	20.9744	36.2332	16.8843	133.813	17.6728	33.743	5.67797	6.61818	23.2408	547379..547537	72.9045	1.97758	3.93833	0.0001773	0.0329237	0.724322
CCNA_00536	42.8914	22.2718	18.963	27.0844	22.0022	28.4294	40.7082	18.6724	17.5252	26.5959	547831..551901	26.6426	-0.0728768	-1.05181	0.848563	0.987362	1
CCNA_00537	56.6593	22.8774	22.0727	20.7726	20.9961	21.3715	17.4955	20.9382	21.4425	26.9366	552015..556205	28.6756	0.295087	1.22696	0.445642	0.850132	1
CCNA_00538	12.8678	20.9941	21.7088	22.089	13.3016	23.4556	18.2454	24.2153	19.5584	31.4624	556424..558220	23.3874	-0.418865	-1.33688	0.225049	0.748121	1
CCNA_00539	12.3776	9.41588	5.52054	8.40007	9.70858	7.69331	11.2207	7.41517	8.64304	9.10544	complement(558249..559709)	9.08453	-0.050204	-1.03541	0.871137	0.991045	1
CCNA_00540	2.03748	7.87892	4.52515	6.36996	1.8053	7.24222	3.41424	2.27509	9.16083	8.25409	complement(559904..560776)	6.06929	-0.451361	-1.36733	0.304206	0.788784	1
CCNA_00541	0	8.0945	7.9904	8.68805	0	7.95706	2.89382	11.1024	6.12984	5.97943	561036..561344	6.8125	-0.476351	-1.39122	0.416492	0.840597	1
CCNA_00542	0	4.50319	4.06425	6.51029	2.43214	3.79434	0.919948	1.67185	5.84606	1.14052	complement(561341..561664)	3.50198	0.365446	1.28828	0.551755	0.892102	1
CCNA_00543	12.7507	2.56139	3.79268	5.59662	3.6314	2.69775	2.28927	2.21886	1.61642	6.24396	complement(561713..562363)	5.66655	0.750185	1.68201	0.107873	0.65905	1
CCNA_00544	61.7611	26.4086	21.1352	28.8615	19.4323	22.849	27.1197	22.7235	21.8332	31.7368	562579..563754	31.5197	0.206455	1.15385	0.516499	0.881341	1
CCNA_00545	5.74045	25.0812	43.9395	24.6659	10.1726	28.9063	22.6742	33.4647	36.3862	41.3995	563825..564547	32.5662	-0.595266	-1.51075	0.137382	0.699217	1
CCNA_00546	9.08669	9.05075	11.5621	6.61234	4.36108	8.97184	11.8007	10.1464	11.8265	9.4388	564671..565453	10.4368	-0.389194	-1.30966	0.235621	0.758112	1
CCNA_00547	157.21	247.909	192.036	261.488	336.298	353.909	309.353	195.606	237.562	208.56	565748..565879	260.998	-0.181502	-1.13406	0.568132	0.90129	1
CCNA_00548	4.44125	3.90325	3.69893	4.30916	1.96757	5.26214	3.34902	3.38126	5.51763	7.61202	565904..566170	5.02441	-0.526365	-1.4403	0.289261	0.781233	1
CCNA_00549	24.9443	16.6387	15.093	24.823	25.2187	20.8399	17.6844	17.9196	17.7084	18.5362	566164..567090	21.3435	0.0933318	1.06683	0.746778	0.951524	1
CCNA_00550	2.54831	4.97692	4.08755	2.9304	3.76319	3.52254	5.40898	4.1389	4.42223	3.17647	567006..568052	4.13382	-0.170656	-1.12557	0.614177	0.918007	1
CCNA_00551	9.41122	11.3433	10.4509	11.7403	15.4863	9.15952	10.1382	10.6452	12.8852	6.28451	complement(568260..568700)	11.6864	0.190501	1.14116	0.570381	0.9019	1
CCNA_00552	69.2354	8.85067	3.14527	3.25703	14.4999	2.61012	4.42981	2.68347	3.57466	5.09966	complement(568956..569426)	19.7976	2.24215	4.73101	0.0001448	0.0329237	0.591502
CCNA_00553	8.69596	3.89076	3.95046	10.2271	3.85251	5.15163	5.96126	5.29641	5.05099	8.62235	complement(569423..570172)	6.12335	-0.074715	-1.05315	0.834105	0.983447	1
CCNA_00554	1.10206	3.09938	3.26349	4.51474	1.95294	3.26438	2.58543	3.57987	5.73739	3.66324	570238..571044	3.76606	-0.432871	-1.34992	0.290007	0.781967	1
CCNA_00556	7.61639	10.5727	10.4096	9.85317	8.13276	7.9829	4.90881	11.0619	12.3391	10.5893	571546..573063	9.37641	-0.0871636	-1.06228	0.770603	0.958996	1
CCNA_00557	15.5828	13.6283	10.1294	13.7672	18.5217	7.88055	8.78904	13.1947	12.6814	10.4226	complement(573020..573799)	14.3259	0.322159	1.2502	0.315005	0.790776	1
CCNA_00558	5.3415	3.44259	6.92022	5.18264	5.52161	5.27399	2.23771	4.06666	2.52802	4.99364	complement(573796..574461)	5.28171	0.354886	1.27888	0.325494	0.79382	1
CCNA_00559	4.38617	2.90247	1.14606	2.67026	2.51469	1.52849	0.778233	1.57145	3.29699	2.09046	complement(574589..575737)	2.72393	0.385817	1.3066	0.365162	0.812531	1
CCNA_00561	1.71857	0.604155	0	2.22328	0.761365	2.03622	0.863951	0	1.22005	1.60665	576324..576668	1.14537	-0.275507	-1.21042	0.742704	0.949874	1
CCNA_00562	0.559874	3.14913	1.08802	1.62967	0.74411	1.82423	0.562914	1.023	2.98099	0.697883	576665..577723	1.43416	-0.0285673	-1.02	0.960053	0.998993	1
CCNA_00563	25.307	11.0148	10.7058	8.05486	12.8132	11.4227	15.3474	7.82914	8.84038	9.26326	577720..578457	13.5791	0.270041	1.20584	0.398195	0.8325	1
CCNA_00565	1.8709	7.29457	7.64933	5.94086	4.21961	7.35544	6.66923	6.94061	7.60692	7.73827	complement(580036..581778)	7.26209	-0.452192	-1.36812	0.167027	0.719432	1
CCNA_00566	2.44598	7.56689	15.2108	9.49296	3.4676	10.1433	6.3941	9.53449	10.766	9.29921	complement(582330..583541)	9.22742	-0.296694	-1.22833	0.442207	0.849096	1
CCNA_00567	19.0971	3.60455	4.98148	4.72555	13.8547	4.40388	4.51025	3.51283	3.73056	5.0325	complement(583664..585976)	9.25267	1.00661	2.00918	0.006379	0.258841	1
CCNA_00568	0.254685	1.96973	1.83834	2.30636	1.35397	0.301759	1.28034	0.620479	1.08484	0.476197	complement(585948..587111)	1.54462	1.11678	2.16863	0.0448284	0.521721	1
CCNA_00569	5.50517	7.54773	9.93422	6.76583	6.58506	7.50111	5.53506	4.19126	6.05775	5.66131	complement(587111..588187)	7.2676	0.29783	1.22929	0.348859	0.804638	1
CCNA_00570	0.327211	1.38035	1.8168	0.634959	2.31939	0.775381	4.27685	1.79364	2.09064	1.63147	complement(588225..589130)	2.1136	-0.661571	-1.5818	0.234696	0.75798	1
CCNA_00571	0	0	0	0	0	0	0	0	1.59619	0	589132..591768	0.319239	-5.10173	-34.3378	0.0165939	0.371511	1
CCNA_00572	14.4074	2.26428	1.97636	6.13976	9.16119	5.22152	2.55629	4.85208	4.81322	6.02149	591765..593513	6.7898	0.381828	1.30299	0.361889	0.810481	1
CCNA_00573	9.51816	17.3694	17.1609	20.8914	16.5828	22.048	18.8171	17.2613	18.4492	23.3289	593829..596600	19.9809	-0.345406	-1.27051	0.297892	0.784317	1
CCNA_00574	27.2999	9.91252	10.5323	12.3527	18.7379	11.3893	9.66483	9.99205	10.0998	10.8638	596740..599052	15.7671	0.486057	1.40061	0.0988896	0.642862	1
CCNA_00575	16.6904	4.28415	4.56003	5.31232	9.62422	4.70841	6.39278	4.84074	3.57346	2.47674	599049..600167	8.09423	0.75432	1.68684	0.0487648	0.527654	1
CCNA_00578	5.84029	11.9903	16.6678	13.2221	8.07263	11.6252	10.4522	12.1654	13.0189	11.4295	601496..604033	11.7382	-0.118046	-1.08526	0.704721	0.941265	1
CCNA_00579	21.4105	5.44243	6.12686	3.51556	5.6912	2.43922	1.49032	3.31026	4.20916	4.41382	complement(604210..606009)	8.43731	1.25907	2.39341	0.002807	0.150861	1
CCNA_00580	0.76901	3.44685	4.26984	2.79802	0.340689	2.79039	1.25643	2.75172	2.79792	3.17527	complement(606207..609290)	2.55434	-0.163169	-1.11974	0.707858	0.942196	1
CCNA_00582	105.724	54.5363	36.2833	52.5787	96.501	34.3064	48.6089	30.7404	27.533	37.7476	611200..611757	69.1247	0.85453	1.80817	0.007023	0.274866	1
CCNA_00583	91.6665	73.1345	58.2365	66.162	93.5093	67.2711	104.584	72.1974	65.2297	74.0139	complement(611838..613205)	76.6591	-0.0825077	-1.05886	0.822103	0.978637	1
CCNA_00585	8.14124	9.27686	9.50828	7.98991	7.2135	7.48397	9.31448	8.20725	8.76908	7.69852	613324..614379	8.42596	-0.003878	-1.00269	0.989415	0.998993	1
CCNA_00586	18.0276	25.9759	17.5477	25.3374	23.664	18.9864	18.3492	18.5711	18.3282	22.8875	complement(614415..615746)	22.1105	0.114888	1.08289	0.685944	0.935624	1
CCNA_00587	67.1327	132.69	92.8018	130.144	111.596	91.9766	117.672	106.382	103.753	126.262	615934..617430	109.209	-0.0952483	-1.06825	0.807581	0.972736	1
CCNA_00588	1715.72	1340.92	860.733	1334.31	1725.97	985.688	1151.27	1072.82	828.678	971.554	617604..617843	1395.53	0.387214	1.30787	0.329738	0.794141	1
CCNA_00589	50.4426	32.8493	26.8598	31.291	17.5847	20.3302	29.5153	29.4637	23.1885	38.6537	complement(617851..618567)	31.8055	0.073716	1.05242	0.809313	0.973797	1
CCNA_00590	1.33538	3.38	2.66923	5.00989	2.3664	4.90481	2.68525	4.22932	3.41283	4.66073	complement(618615..619724)	3.97859	-0.47359	-1.38856	0.178075	0.725163	1
CCNA_00591	55.0105	24.4384	21.8513	22.2974	18.4531	18.8047	13.5746	17.671	16.2126	29.1828	complement(619728..621791)	28.4101	0.464333	1.37968	0.205559	0.733576	1
CCNA_00592	37.7506	9.56295	8.01434	10.7729	14.019	7.72876	9.20982	7.60784	8.67055	7.61202	complement(621804..622871)	16.024	0.83441	1.78313	0.0195647	0.391363	1
CCNA_00593	17.9669	15.7904	13.4051	15.1324	15.422	10.9765	9.03222	10.829	10.8949	14.6972	complement(622934..624517)	15.5434	0.351063	1.2755	0.203717	0.731912	1
CCNA_00594	156.448	26.4405	20.79	23.2721	34.9074	13.0199	12.4398	12.2951	15.4867	22.8292	complement(624522..626342)	52.3716	1.63319	3.10198	0.0002288	0.0355361	0.934767
CCNA_00595	6.2884	11.3691	6.48433	6.77931	5.30648	6.74111	9.03222	5.65388	4.25168	6.34545	complement(626899..627888)	7.24553	0.148269	1.10824	0.662643	0.926901	1
CCNA_00596	26.8464	3.21285	6.66021	3.69475	13.1589	3.0455	3.44582	6.26218	4.05507	4.27201	complement(627846..628364)	10.7146	1.16699	2.24542	0.0161708	0.371511	1
CCNA_00597	1.32135	1.72533	2.25339	1.89255	0.418133	1.6774	2.18257	2.18442	1.74209	2.11765	628523..631663	1.98083	-0.399511	-1.31906	0.249469	0.767425	1
CCNA_00598	58.7647	48.4282	35.2118	45.9931	89.3493	47.9355	70.7786	37.4549	43.0107	37.8228	complement(631886..634816)	55.5494	0.155224	1.11359	0.69331	0.937005	1
CCNA_00600	1.20509	3.05024	3.34558	2.18261	0.427107	1.85619	0.969311	3.9635	2.90877	4.9571	635661..636890	2.93097	-0.559237	-1.47349	0.224795	0.748121	1
CCNA_00601	5.48988	2.35881	1.35475	2.36738	2.43214	1.80683	1.2266	1.48609	2.16521	1.33061	636877..637848	2.80059	0.605858	1.52188	0.176453	0.722979	1
CCNA_00602	2.48173	3.48975	2.88117	3.50242	1.99902	2.94043	6.8051	3.57271	2.72282	3.65592	637845..639158	3.9394	-0.439587	-1.35622	0.213418	0.738106	1
CCNA_00603	2.374	1.04321	3.46011	4.60679	1.84054	2.46119	2.98362	3.6148	3.3707	1.84949	639155..640153	2.85596	-0.135996	-1.09885	0.746094	0.95095	1
CCNA_00604	35.9643	47.5001	42.9235	49.1352	44.6719	34.846	41.9046	37.8725	38.1783	35.6122	640131..641012	44.039	0.171062	1.12589	0.591467	0.907767	1
CCNA_00605	31.9373	7.66105	4.38105	7.77725	29.2966	11.3521	10.1999	8.4673	9.06917	9.36702	complement(641122..641910)	16.2107	0.615729	1.53233	0.147728	0.70938	1
CCNA_00607	17.4268	10.5818	8.46652	12.8095	19.3889	12.6703	13.6388	8.08115	8.50548	10.7995	642577..645570	13.7347	0.271215	1.20682	0.413718	0.840597	1
CCNA_00608	18.7155	13.2903	14.6521	17.0693	27.1957	15.3006	16.9354	17.4404	15.4123	15.9803	645702..647285	18.1846	0.0754596	1.0537	0.79507	0.968065	1
CCNA_00609	21.2359	9.75476	14.4636	10.989	23.5827	11.7418	7.11708	16.3831	19.297	13.7647	647369..648415	16.0052	0.116578	1.08416	0.729014	0.946907	1
CCNA_00610	14.7999	3.84209	5.05691	5.89118	10.7933	6.54205	5.95211	5.33912	4.44516	4.68297	648428..651031	8.07668	0.466381	1.38164	0.166463	0.718816	1
CCNA_00611	317.988	60.2801	54.197	62.7476	251.971	68.7949	80.3334	48.0511	62.4373	64.8495	651343..652815	149.437	1.08944	2.12791	0.0207001	0.40001	1
CCNA_00612	4.01971	2.82621	1.30194	3.68348	1.18721	3.37356	2.35756	1.63218	1.18903	2.29651	complement(653295..654179)	2.60371	0.148573	1.10847	0.743523	0.949874	1
CCNA_00613	2.6469	4.65253	3.0618	3.7096	3.71335	3.00547	3.54837	3.08993	2.97522	3.57431	complement(654176..655519)	3.55684	0.0901737	1.0645	0.784852	0.964827	1
CCNA_00614	6.57457	11.4862	14.27	12.3715	14.2986	19.7105	15.0233	11.7703	10.3249	10.8028	complement(655396..656883)	13.5264	-0.23536	-1.1772	0.468511	0.857249	1
CCNA_00615	22.2416	7.28338	9.41712	11.562	22.9466	10.168	11.5386	9.15478	10.3823	11.8366	complement(656945..659863)	14.6901	0.367944	1.29051	0.294124	0.782733	1
CCNA_00616	3.25058	7.77054	4.33164	7.14886	3.4562	8.08794	4.57553	4.3556	4.61531	4.86222	complement(660157..660612)	5.29932	-0.0718602	-1.05107	0.861791	0.989715	1
CCNA_00617	1.98771	0.199649	0.788325	0.367352	1.258	0	0.285501	0.864748	0.403176	0.530933	660731..661774	0.920209	0.889299	1.85228	0.231428	0.756557	1
CCNA_00618	7.52102	3.37841	6.61193	3.7838	3.7022	3.96051	5.04124	4.07181	1.77977	3.90623	661761..663179	4.99947	0.345599	1.27068	0.323308	0.79382	1
CCNA_00619	2.08281	3.74236	1.79893	3.89204	2.46062	1.91939	4.88628	0.986664	2.30009	2.01928	663176..664456	2.79535	0.216032	1.16153	0.585285	0.90397	1
CCNA_00620	2.01156	1.23752	0.837671	0.975866	1.33675	0.89376	1.76967	1.07202	1.78506	2.03727	664466..665644	1.51156	-0.350514	-1.27501	0.461835	0.854797	1
CCNA_00621	1.0683	11.2667	2.07607	5.18264	5.67937	6.64522	9.66692	6.50665	4.55044	11.3189	complement(666047..666601)	7.73763	-0.643242	-1.56184	0.153361	0.715518	1
CCNA_00622	12.7507	6.72366	7.07967	12.3715	48.0151	4.72107	9.61494	9.7075	7.92046	6.9535	666621..666806	17.3881	1.04521	2.06367	0.0465646	0.526734	1
CCNA_00623	57.8675	117.055	113.462	127.578	75.0658	124.559	112.584	107.943	108.47	112.214	666944..669151	113.154	-0.259902	-1.1974	0.525315	0.881341	1
CCNA_00624	2.80154	3.04413	3.39386	4.44799	1.35397	2.26319	2.30461	3.25752	3.0737	3.33338	complement(669233..670396)	3.0083	0.0517105	1.03649	0.889516	0.995494	1
CCNA_00625	13.3326	43.5615	44.852	56.8171	21.5418	32.5229	33.9067	60.1865	48.4387	69.8977	670498..670875	48.9905	-0.500741	-1.41494	0.18587	0.727631	1
CCNA_00626	10.3774	8.38525	7.13793	9.61794	10.2927	6.33126	8.40931	4.62247	7.25717	4.53706	complement(670929..672842)	9.16226	0.498311	1.41256	0.0743121	0.603243	1
CCNA_00627	1.92502	5.41385	4.27538	5.81084	2.27421	3.80138	3.87095	5.86232	1.36661	5.99885	complement(672921..673382)	4.18002	-0.112487	-1.08109	0.816605	0.976574	1
CCNA_00629	1.72813	4.74967	6.01884	3.65834	3.20161	3.62974	2.5273	3.25332	2.34214	4.40615	674363..676249	3.87132	0.230966	1.17362	0.5245	0.881341	1
CCNA_00632	0	0.56486	1.78431	1.03934	1.42369	0	1.61552	0.978642	0.570347	0	679026..679394	0.962439	0.799832	1.7409	0.396027	0.8325	1
CCNA_00634	3.56743	0.501645	2.57501	2.53831	1.26436	1.0567	0	1.0864	1.51955	2.44574	680464..681294	2.08935	0.602398	1.51824	0.286613	0.781233	1
CCNA_00635	54.631	31.4909	37.6935	34.0383	48.2275	29.9845	31.0987	25.6894	45.3426	44.689	682056..683531	41.2162	0.135208	1.09825	0.688271	0.935624	1
CCNA_00636	2.43565	8.5624	3.8639	9.22778	5.54939	7.21459	7.34663	5.93388	7.41049	5.63835	683537..684388	6.70879	-0.21607	-1.16156	0.520499	0.881341	1
CCNA_00637	14.6506	7.7428	6.11458	9.85819	18.3826	9.087	8.50197	6.16837	5.23527	5.94433	complement(684440..687454)	11.3498	0.609471	1.5257	0.0573752	0.560336	1
CCNA_00638	15.6489	3.77011	6.13689	5.02577	10.0841	6.22366	8.47208	3.26593	3.88442	6.20656	complement(687421..690129)	8.13315	0.443359	1.35977	0.2231	0.747632	1
CCNA_00639	32.0884	34.7389	30.5719	42.1018	29.7241	35.5352	32.446	31.4258	31.0639	36.7029	complement(690126..691751)	33.845	-0.0500399	-1.03529	0.874119	0.991607	1
CCNA_00640	10.7411	30.9629	20.8735	18.0641	13.3239	19.0895	26.9985	26.8222	16.7756	27.4469	complement(691897..692172)	23.4266	-0.342848	-1.26826	0.326539	0.79382	1
CCNA_00641	131.757	42.8095	44.8915	33.5737	114.974	50.2627	34.1217	30.3972	36.8479	49.7682	complement(692376..692672)	73.6011	0.763474	1.69757	0.0349035	0.477189	1
CCNA_00642	12.6395	4.03941	2.55197	3.71624	6.10863	2.04214	4.62114	3.49921	1.63146	2.14842	complement(692642..692899)	5.81114	0.883705	1.84511	0.124759	0.681588	1
CCNA_00643	2.01669	1.41791	14.5567	11.7403	1.78688	5.9736	2.02764	4.91318	8.59012	6.28451	693356..693502	6.30368	0.190927	1.1415	0.772601	0.960244	1
CCNA_00644	6.93827	6.94778	8.75544	9.51989	5.40245	7.47335	6.34177	7.9395	8.65714	9.95894	694013..695422	8.07414	-0.159299	-1.11674	0.580157	0.90397	1
CCNA_00649	6.76834	4.37805	1.50322	4.02779	7.19646	4.49084	4.62747	2.80321	0.960995	3.54343	699198..700292	4.77477	0.435563	1.35244	0.284424	0.781233	1
CCNA_00654	92.4059	67.6215	74.3433	64.8951	96.9142	82.4493	51.5733	68.6861	82.4695	53.1257	707254..708039	79.236	0.140746	1.10248	0.680658	0.93414	1
CCNA_00655	17.7902	12.0877	13.4471	16.9226	14.5708	13.639	14.8806	11.837	9.76406	12.6717	complement(708328..710310)	14.9637	0.180584	1.13334	0.517063	0.881341	1
CCNA_00656	5.65134	11.2391	10.3101	10.5488	8.15482	8.60901	11.2017	7.86752	8.48251	9.15772	710696..712531	9.18081	-0.0104145	-1.00724	0.972899	0.998993	1
CCNA_00657	13.1465	12.3242	10.5842	13.1807	10.0953	11.5525	14.0991	10.1423	6.84416	13.929	712528..713880	11.8662	0.007634	1.00531	0.979056	0.998993	1
CCNA_00658	4.25939	4.79157	3.46863	2.75514	4.27721	2.01866	5.42452	4.49669	2.41906	3.36257	713877..714920	3.91039	0.0898206	1.06424	0.806616	0.972736	1
CCNA_00659	64.4108	42.3346	33.3185	44.1142	60.1557	42.4045	48.6991	36.2366	34.8946	35.2935	714931..717825	48.8668	0.219149	1.16405	0.556647	0.896295	1
CCNA_00660	201.262	85.838	85.2375	106.337	211.797	94.7044	108.773	79.5124	95.0386	115.266	complement(717822..718802)	138.094	0.392456	1.31263	0.307454	0.789289	1
CCNA_00661	9.54103	19.1663	18.9198	24.6861	7.84994	26.2426	26.7229	21.169	25.1582	15.2909	complement(718799..719233)	22.9167	-0.541702	-1.45569	0.112324	0.667893	1
CCNA_00662	11.0744	4.19262	6.62193	13.7757	19.6248	3.028	10.278	2.59425	3.62859	8.49492	complement(719217..719564)	11.0579	0.92239	1.89525	0.047739	0.526734	1
CCNA_00664	20.3309	23.2701	25.3335	32.4184	20.9466	33.052	37.0796	27.6455	28.1953	24.6058	720528..721781	30.1156	-0.350535	-1.27503	0.262255	0.774629	1
CCNA_00665	9.05399	2.36443	3.87806	3.17923	4.12572	1.37924	3.38117	2.67846	2.0201	2.25716	721949..723094	4.52029	0.834259	1.78294	0.0316266	0.456526	1
CCNA_00666	3.34976	2.35518	1.85991	5.95857	0.742008	3.47279	1.68397	4.08044	1.78354	2.08773	723091..723444	2.85309	0.0217207	1.01517	0.969247	0.998993	1
CCNA_00667	6.75463	5.62858	2.63919	4.04552	6.20657	5.33541	4.27601	3.04742	4.44004	1.71511	complement(723506..724690)	5.0549	0.323297	1.25119	0.370517	0.81462	1
CCNA_00668	7.31984	2.57325	4.53321	4.37055	2.4945	3.83604	2.83061	3.42943	3.59757	3.5093	complement(724701..725753)	4.25827	0.189474	1.14035	0.572017	0.9019	1
CCNA_00669	1.80985	0.848325	1.13888	0.936546	1.17598	0.428874	0.485247	1.02883	0.856565	1.42879	complement(725750..728206)	1.18192	0.328479	1.25569	0.437085	0.847802	1
CCNA_00670	3.54327	3.32165	5.24629	6.1118	3.83716	6.29727	7.12502	3.5968	2.79493	3.4352	complement(728203..728955)	4.64984	-0.065	-1.04608	0.860078	0.988358	1
CCNA_00671	64.3813	42.6341	30.5512	36.5599	63.3461	34.5926	57.5804	24.6217	28.6988	33.3603	complement(728965..729756)	47.4945	0.333183	1.25979	0.283739	0.781233	1
CCNA_00672	9.5868	6.48114	6.55134	7.63215	6.2074	8.7375	4.81943	7.6356	4.71175	6.8942	complement(729890..730693)	7.29176	0.0154582	1.01077	0.959402	0.998993	1
CCNA_00673	11.764	8.27116	11.7573	11.6044	10.9446	11.3249	7.09674	11.6432	6.05484	7.69852	730781..731788	10.8683	0.214159	1.16003	0.486522	0.875709	1
CCNA_00674	3.3256	2.83924	1.8465	2.30478	1.89426	1.68869	1.433	3.4723	2.02363	3.10902	complement(731887..733134)	2.44208	-0.086761	-1.06198	0.817208	0.976574	1
CCNA_00675	18.7155	2.10539	2.90964	4.84237	12.6029	3.54795	0.752685	5.4715	5.3146	4.19919	complement(733100..733495)	8.23516	0.879275	1.83945	0.096813	0.636703	1
CCNA_00676	18.5283	16.501	8.91596	12.7839	16.4169	21.953	12.4193	12.7896	14.0305	15.397	complement(733495..733734)	15.3179	-0.225525	-1.1692	0.528945	0.881341	1
CCNA_00677	16.3264	18.7288	12.4048	14.7292	15.608	15.7807	17.279	11.7756	8.23531	21.1542	complement(733882..734571)	15.5594	-0.00147	-1.00102	0.99621	0.998993	1
CCNA_00678	65.1923	24.6067	17.1461	31.9596	32.2258	25.6118	38.6378	17.5544	12.6665	27.3725	complement(734576..735007)	34.2261	0.387891	1.30848	0.262146	0.774629	1
CCNA_00679	8.55154	6.90324	8.08943	8.19478	11.2253	10.1321	10.1902	8.48784	6.74545	6.31674	735544..736479	8.59285	-0.0357168	-1.02507	0.904093	0.998437	1
CCNA_00680	5.59346	3.9327	4.65856	3.31656	2.89103	3.03752	6.09249	4.54238	3.30909	3.19561	complement(736612..737247)	4.07846	0.0006499	1.00045	0.998681	0.998993	1
CCNA_00681	0.803397	5.08374	5.799	6.23602	4.27107	1.66581	2.0194	1.2233	2.85173	3.25466	complement(737244..737981)	4.43865	0.995347	1.99356	0.0323713	0.462366	1
CCNA_00682	0	4.54103	0.717221	4.5955	0.572268	1.14787	1.29875	0.393376	0.917028	2.01269	738076..738534	2.0852	0.824211	1.77057	0.283266	0.781233	1
CCNA_00683	8.71922	4.22316	4.73366	5.76527	7.21057	6.19849	6.81844	5.07455	3.43886	5.67577	complement(738931..740460)	6.13038	0.0654132	1.04638	0.831521	0.983012	1
CCNA_00685	3.35789	5.7336	3.9952	3.72345	0	6.25198	6.26994	2.62951	5.7893	5.68046	complement(741108..741725)	5.32424	-0.656372	-1.57611	0.135615	0.699217	1
CCNA_00686	45.8945	116.281	142.678	158.728	83.344	178.563	123.881	109.041	135.902	137.865	741897..743330	137.05	-0.368977	-1.29144	0.376303	0.819839	1
CCNA_00687	2.39075	5.60305	3.98231	9.79408	9.88546	8.49792	5.60872	4.85375	7.35471	3.97343	complement(743356..743727)	6.33113	-0.0005539	-1.00038	0.998993	0.998993	1
CCNA_00688	26.9092	11.2882	15.8199	12.8716	24.8445	14.066	12.7319	10.4672	10.1135	11.1338	complement(743786..745096)	18.3467	0.553347	1.46749	0.0775855	0.605204	1
CCNA_00689	11.1917	9.83598	9.67418	11.6815	13.7477	9.64386	10.6131	7.97839	8.12579	9.51169	745305..747635	11.2262	0.218196	1.16328	0.402981	0.8325	1
CCNA_00690	33.5275	16.9559	13.7169	16.3603	15.6352	15.6807	16.5591	13.2554	14.1976	30.7941	complement(747704..748207)	19.2391	-0.023885	-1.01669	0.945198	0.998993	1
CCNA_00691	65.0117	13.408	7.2194	6.16765	31.4898	15.9191	9.58683	5.27952	6.15374	7.56346	complement(748560..748901)	24.6593	1.33274	2.5188	0.006605	0.261939	1
CCNA_00692	10.2372	5.49824	7.97354	4.96639	14.2359	5.05392	4.57459	5.36915	7.67137	5.67143	749166..751250	8.58226	0.504925	1.41905	0.108865	0.659812	1
CCNA_00693	6.05007	12.0523	24.0745	15.6537	4.46719	20.3102	9.12438	10.4405	22.1911	25.7665	complement(751485..751778)	17.5666	-0.501687	-1.41587	0.237183	0.758112	1
CCNA_00694	4.50221	3.40896	4.42273	3.13622	0.818289	2.94074	3.24991	3.44525	3.44207	5.25226	complement(751775..754342)	3.66605	-0.238475	-1.17974	0.516496	0.881341	1
CCNA_00695	5.25819	3.18705	3.5236	3.75306	2.57048	3.75953	2.91683	3.20258	5.53498	2.93815	complement(754514..756148)	3.67041	-0.0981627	-1.07041	0.761704	0.955977	1
CCNA_00696	199.694	16.6457	12.0023	23.9697	175.57	18.2941	30.5308	15.0466	20.0958	22.454	756229..756804	85.5764	1.87959	3.67969	0.0003187	0.0406862	1
CCNA_00698	8.33403	3.34833	2.97474	2.69539	10.0216	8.81645	2.39408	5.43854	5.07128	2.96811	complement(757318..757815)	5.47481	-0.0172593	-1.01204	0.970433	0.998993	1
CCNA_00699	21.7399	8.33733	2.1947	3.83516	8.7557	9.95201	6.95481	2.40746	7.01527	8.00646	758081..758380	8.97256	0.231188	1.1738	0.641218	0.922711	1
CCNA_00700	14.4686	35.0636	21.1094	37.5351	12.4107	37.0214	44.8797	25.4996	23.0564	25.8056	complement(759099..761024)	31.2526	-0.426206	-1.34369	0.249424	0.767425	1
CCNA_00703	0	0	0.79518	2.7791	1.26894	0.848424	1.43992	2.6168	0	0	762427..762633	0.981029	0.0251884	1.01761	0.981182	0.998993	1
CCNA_00704	23.9558	45.2658	22.4458	36.802	49.085	36.3665	36.1289	14.5907	13.8179	9.33154	762676..762873	35.5109	0.648421	1.56745	0.0819826	0.612743	1
CCNA_00705	9.16866	23.6368	26.0196	21.7457	10.8318	23.5372	22.534	11.1686	15.9109	19.6828	complement(763025..763315)	18.5667	-0.0169708	-1.01183	0.96018	0.998993	1
CCNA_00706	42.2482	28.6973	15.9036	30.1069	36.7993	23.7559	35.998	23.1151	23.3842	21.422	complement(763590..764003)	30.7511	0.174294	1.12841	0.555918	0.895475	1
CCNA_00707	4.106	7.12099	9.42322	8.3219	1.45524	10.2163	7.70616	11.3371	10.2994	8.87143	complement(764103..765185)	9.68608	-0.709759	-1.63553	0.0534331	0.53989	1
CCNA_00708	5.2252	1.29663	3.15722	3.97631	2.85956	3.36863	1.69969	2.99528	3.49127	3.63974	complement(765182..767110)	3.30299	-0.008228	-1.00572	0.981166	0.998993	1
CCNA_00709	8.09982	58.088	40.476	67.0628	40.1901	46.0653	39.0903	38.4799	49.4519	68.6557	767218..767400	48.3486	-0.215442	-1.16106	0.564445	0.899047	1
CCNA_00710	12.9223	35.9859	25.3234	26.8789	25.8181	28.2199	46.8749	42.2849	30.3995	14.8443	complement(767521..768690)	32.5247	-0.417601	-1.3357	0.257708	0.771265	1
CCNA_00711	70.2764	106.772	105.997	131.67	85.1712	123.463	144.294	111.189	130.557	115.625	768833..769933	125.026	-0.382286	-1.30341	0.305338	0.788934	1
CCNA_00712	8.4701	31.0996	18.2891	31.0465	33.355	27.8768	25.5483	31.5263	24.7205	42.2319	complement(769938..770252)	30.3807	-0.371748	-1.29392	0.281679	0.779589	1
CCNA_00714	9.88178	14.6675	7.31566	16.3349	9.72855	13.0092	22.0788	12.706	10.9126	6.15882	complement(770440..770709)	12.9731	-0.179798	-1.13273	0.634701	0.922486	1
CCNA_00716	1.67488	0	0	4.33351	5.93607	3.9689	0	3.06033	0	1.04387	complement(771391..771567)	2.38889	0.284393	1.2179	0.768853	0.957984	1
CCNA_00718	146.739	28.1164	20.5524	30.9976	100.734	31.1306	34.2258	20.5318	16.4237	20.3921	complement(771887..772783)	65.4281	1.29609	2.45563	0.00312	0.163405	1
CCNA_00720	9.37885	7.74099	8.83011	9.58349	8.91226	8.69664	13.6664	7.61645	8.00918	8.13269	775596..777776	9.22426	-0.090616	-1.06482	0.761984	0.955977	1
CCNA_00721	48.6876	77.8455	91.4124	107.893	36.5886	106.934	62.1872	62.7126	112.014	44.3929	complement(777942..779585)	77.6481	-0.159628	-1.117	0.702469	0.940749	1
CCNA_00722	5.0937	117.468	165.734	92.2546	18.9556	114.065	35.8495	129.06	203.226	22.2225	complement(779643..779933)	100.884	-0.375028	-1.29686	0.517975	0.881341	1
CCNA_00723	30.4055	74.8222	65.8409	86.5368	52.5342	68.4482	84.0691	72.2238	91.7381	58.7456	780108..780302	75.045	-0.315531	-1.24447	0.32516	0.79382	1
CCNA_00724	7.60137	13.604	9.20852	23.6904	3.67372	6.95945	12.5061	9.68035	8.83041	10.7672	780321..780749	11.5556	0.197307	1.14656	0.627395	0.920775	1
CCNA_00725	0	1.25752	2.73096	0.867682	0.396185	0.529785	0.449567	0.272337	1.26973	1.3934	complement(780950..781612)	1.05047	0.4845	1.3991	0.518767	0.881341	1
CCNA_00726	2.03982	3.82446	3.90113	5.86415	3.81556	5.6393	5.0133	2.76085	2.73531	6.35658	complement(781663..782970)	4.50107	-0.237226	-1.17872	0.483668	0.873082	1
CCNA_00727	2.97943	9.77577	7.99576	6.42405	6.15979	11.4729	6.98976	9.98068	11.2808	10.8321	783127..783723	10.1113	-0.630268	-1.54785	0.0657797	0.586216	1
CCNA_00728	2.80154	0.716266	2.82822	1.48266	1.57964	1.05616	0.768204	1.39608	2.71209	0.63493	783796..784959	1.88166	0.420552	1.33844	0.415938	0.840597	1
CCNA_00729	0.454335	0.958314	0.756792	2.20411	1.40896	1.88409	0.685203	3.18227	1.93525	2.26531	785054..786358	1.99042	-0.872628	-1.831	0.0666496	0.586216	1
CCNA_00730	3.86007	1.08559	1.92893	0.749054	3.76221	2.51544	2.32862	1.64572	1.09614	1.92463	786434..787201	2.27717	0.096833	1.06942	0.851171	0.987462	1
CCNA_00732	2.53379	8.90741	8.28483	7.64846	6.4857	4.33639	4.52898	5.65856	5.59622	6.84313	789387..790439	6.77204	0.290772	1.22329	0.404224	0.833126	1
CCNA_00733	0.315712	3.55158	1.22707	1.63372	1.39867	2.24439	3.49169	1.7306	2.46543	2.55798	790499..791437	2.49802	-0.584125	-1.49913	0.230523	0.755232	1
CCNA_00734	12.7191	17.6561	22.0918	21.0955	17.338	22.605	20.9857	16.2881	18.7537	22.1555	791491..792399	20.1576	-0.181561	-1.13411	0.544067	0.887049	1
CCNA_00736	6.43193	4.93333	7.14251	3.40398	15.0246	6.92796	6.46685	3.56133	3.73594	4.37313	complement(793143..793649)	7.38726	0.487187	1.40171	0.23528	0.75798	1
CCNA_00738	3.80068	1.14524	0.904408	1.75602	1.20271	0.643311	0.818855	3.1416	2.50545	1.52278	complement(797019..798110)	1.76181	-0.167298	-1.12295	0.751992	0.952215	1
CCNA_00740	2.83236	15.4887	12.0569	9.7711	5.01919	15.1014	4.42981	10.1589	11.6176	11.3762	complement(798513..799454)	10.5368	-0.254128	-1.19261	0.533249	0.881341	1
CCNA_00741	2.0877	1.95712	1.15917	2.70081	0.616598	0.412262	0	1.27155	0	0.43372	complement(799454..799879)	1.70428	1.67287	3.18849	0.0457953	0.525488	1
CCNA_00742	1.37725	3.63124	1.72058	2.67258	5.1863	1.63181	1.73091	3.14564	3.66652	3.86267	complement(799937..800797)	2.91759	-0.0480356	-1.03386	0.914288	0.998993	1
CCNA_00743	35.5535	28.6734	25.5467	31.4523	40.304	35.6203	39.4264	27.068	28.9519	38.4519	800944..801510	33.9037	-0.157734	-1.11553	0.59769	0.910012	1
CCNA_00744	22.8841	2.92538	1.1551	2.69134	13.8248	3.08112	0	1.90063	0.738449	2.59319	801752..802036	8.69614	2.09711	4.2785	0.003853	0.185188	1
CCNA_00745	26.9121	83.3733	171.14	97.9189	44.7099	76.2282	60.881	131.13	147.47	162.226	complement(802070..802774)	115.587	-0.487181	-1.4017	0.278999	0.779053	1
CCNA_00746	0.816676	0.861295	1.8138	2.64129	0.723611	1.93525	0.821111	1.74093	1.15955	1.01799	complement(802771..803496)	1.37133	0.0247135	1.01728	0.963548	0.998993	1
CCNA_00748	4.61765	1.29865	0	4.77901	0	3.8298	6.49982	2.81245	0.655632	1.72677	805164..805484	3.1049	-0.624631	-1.54182	0.412651	0.840597	1
CCNA_00749	7.97422	13.192	11.9805	10.8218	9.00507	13.5238	13.3625	10.9517	10.7671	11.4991	805489..807384	12.0208	-0.219539	-1.16436	0.436926	0.847802	1
CCNA_00750	8.93105	65.0215	21.5951	62.8011	14.295	61.9547	69.2295	37.5508	34.565	26.3949	complement(807593..808621)	45.939	-0.459457	-1.37502	0.309608	0.790776	1
CCNA_00751	8.59285	16.7821	20.6747	19.9169	9.72855	16.5443	16.0791	12.7933	18.9785	16.8103	complement(808992..810233)	16.2411	-0.138468	-1.10074	0.665052	0.927415	1
CCNA_00752	11.1296	3.79401	3.55796	5.45386	4.18361	5.19479	4.06912	3.49205	1.43657	7.98755	complement(810384..811262)	5.62382	0.212532	1.15872	0.587782	0.905729	1
CCNA_00753	0.856802	3.01204	1.58576	3.69475	0.759164	4.39905	0.861454	2.78319	3.0413	2.13601	complement(811400..812437)	2.6442	-0.468877	-1.38403	0.324108	0.79382	1
CCNA_00754	1.26689	3.26605	2.57924	3.82423	4.11593	3.50247	4.67051	4.37252	7.79474	6.31674	complement(812595..813296)	5.33139	-0.85666	-1.81084	0.0283634	0.443926	1
CCNA_00756	0	0	0	0.687304	0.941473	0	0	0.647167	0	2.64895	complement(813842..814120)	0.659224	-1.0386	-2.05423	0.417395	0.840944	1
CCNA_00757	1.67962	6.88873	4.35209	3.62149	0.992147	4.80934	5.06623	4.9445	5.96198	6.62989	complement(814256..815314)	5.48239	-0.656048	-1.57576	0.101223	0.649821	1
CCNA_00758	89.4066	42.2748	53.7062	50.3914	26.4061	47.7003	24.7072	45.8564	50.109	61.914	815435..816001	52.437	0.0825497	1.05889	0.799668	0.969906	1
CCNA_00759	3.47359	9.51635	11.8381	13.4812	5.30648	13.9789	9.63437	10.6512	14.2006	10.9739	complement(816201..818675)	11.8878	-0.490869	-1.40529	0.152706	0.71537	1
CCNA_00760	8.88837	12.2536	9.9671	15.3316	12.0449	14.7644	17.3476	12.5256	12.7438	10.2104	complement(818810..820510)	13.5183	-0.259786	-1.1973	0.357386	0.808019	1
CCNA_00761	23.9986	13.8956	18.0279	1.82626	38.7752	10.0356	8.51609	8.59807	6.01309	5.27899	complement(820655..820864)	19.3047	1.22831	2.34292	0.0155627	0.371511	1
CCNA_00762	0	0	0.954216	0.55582	0.761365	1.52716	2.59185	2.6168	0	0	complement(820861..821205)	1.34716	-1.34587	-2.54184	0.187985	0.727631	1
CCNA_00763	9.44119	33.8538	23.24	31.7561	8.08647	35.4231	19.9342	26.6431	31.7251	37.0706	complement(821210..822151)	30.1592	-0.550105	-1.46419	0.123597	0.681152	1
CCNA_00764	42.8607	7.25471	10.3565	8.21452	13.0105	11.5202	8.7783	11.8439	9.57908	17.3139	complement(822151..822897)	16.3394	0.320603	1.24885	0.414429	0.840597	1
CCNA_00765	4.07496	2.1488	3.39386	6.58961	2.70795	5.43166	5.12136	3.72288	5.78579	1.90479	823153..823443	4.3933	-0.223665	-1.1677	0.660687	0.926186	1
CCNA_00766	7.68014	4.31986	2.55859	4.63663	12.7026	1.21329	2.57395	3.43032	3.99834	5.42487	complement(823602..824180)	6.37956	0.797231	1.73776	0.0900015	0.628012	1
CCNA_00767	30.5173	13.2825	8.87561	13.1598	14.1636	12.0526	14.6109	13.2764	14.4432	4.52854	complement(824218..824421)	15.9998	0.306992	1.23713	0.466663	0.85582	1
CCNA_00768	3.95271	2.77911	3.65783	4.26128	2.33485	0.78055	3.97418	2.40746	0	1.64235	824776..825000	3.39716	0.977205	1.96865	0.152028	0.713015	1
CCNA_00769	4.11741	3.85988	4.06425	1.77553	6.89106	1.89717	1.37992	4.45826	5.19649	2.28104	824997..825644	4.14163	0.316435	1.24525	0.499042	0.880093	1
CCNA_00770	7.78859	11.9789	13.2439	16.6883	14.6647	14.9958	14.6829	15.7137	12.4409	13.9559	825728..826336	14.3578	-0.191114	-1.14165	0.506572	0.881341	1
CCNA_00772	0	7.614	1.50322	4.37803	1.19941	5.61355	4.08306	0.824473	0.960995	3.37469	complement(827021..827239)	2.97135	0.0167669	1.01169	0.982063	0.998993	1
CCNA_00773	4.61016	6.48271	6.23241	5.05649	1.4208	4.63105	2.82142	4.15079	5.4073	6.62104	827458..828936	4.76052	-0.045796	-1.03225	0.902826	0.998125	1
CCNA_00774	5.07443	38.1189	47.3046	39.7336	10.8855	35.1248	33.5657	34.1599	49.6757	50.6022	829317..830426	40.6256	-0.555809	-1.46999	0.219413	0.741695	1
CCNA_00775	43.7768	32.579	33.688	35.6027	63.0592	43.9818	66.4079	36.642	32.5319	33.0279	complement(830436..831593)	42.5183	-0.096074	-1.06886	0.784015	0.964669	1
CCNA_00776	24.3717	8.07065	6.92771	9.79234	17.4672	7.93362	8.78132	6.18077	8.91671	7.51708	complement(831686..835249)	13.3259	0.649418	1.56854	0.0688479	0.590107	1
CCNA_00777	7.09336	5.84714	4.82127	6.88239	3.68433	7.60747	7.3778	6.77843	6.25123	6.40273	complement(835363..837786)	6.88353	-0.348975	-1.27366	0.219403	0.741695	1
CCNA_00778	10.0273	5.79929	4.75937	4.60302	5.01554	6.03617	5.85394	4.92525	5.85562	4.93915	complement(837946..839778)	6.04091	0.0154929	1.0108	0.959692	0.998993	1
CCNA_00779	109.142	51.3306	42.9931	49.132	99.3184	57.6675	52.643	41.7712	46.0704	42.744	840345..840746	70.3832	0.444654	1.36099	0.143728	0.701621	1
CCNA_00780	0.319799	3.14786	4.61668	4.75774	1.41678	1.13672	1.92921	4.09034	2.27031	4.38492	complement(840760..841686)	2.85177	0.0125149	1.00871	0.980054	0.998993	1
CCNA_00782	26.3514	26.3758	21.6422	28.2902	15.5657	26.994	29.9903	17.1643	19.8766	22.0121	complement(842489..844108)	23.6451	-0.0323225	-1.02266	0.922337	0.998993	1
CCNA_00784	15.743	10.8985	18.8271	8.9299	15.8804	9.75688	8.76657	13.8665	15.131	11.7742	846681..847904	14.0558	0.164058	1.12043	0.60078	0.911599	1
CCNA_00785	1.33538	11.384	12.1413	10.0414	5.47231	8.80097	7.38445	19.0116	14.1016	9.98727	complement(848157..849932)	11.8572	-0.609078	-1.52528	0.154185	0.715952	1
CCNA_00788	26.3364	24.3726	30.6208	24.0243	64.4212	27.4704	51.8272	22.073	31.4808	18.5185	851554..852870	33.9551	0.109303	1.07871	0.768515	0.957984	1
CCNA_00792	2.50172	9.85001	7.22305	9.87107	3.54661	11.7083	9.80968	8.53277	7.28167	6.70454	complement(855026..856210)	8.80738	-0.445377	-1.36167	0.237047	0.758112	1
CCNA_00793	1.08353	5.028	7.46005	4.34539	3.4562	6.29062	1.52518	4.75157	5.07684	4.18692	856299..857666	4.36622	-0.0607875	-1.04303	0.884771	0.994838	1
CCNA_00794	4.71743	8.72836	9.51219	6.90585	4.83983	6.91316	5.49195	9.98068	10.3995	9.59414	857776..858969	8.47589	-0.339399	-1.26523	0.322553	0.79382	1
CCNA_00803	2.60047	5.028	7.2194	6.72834	7.48843	5.00682	4.57553	6.33542	3.69225	8.50889	867854..868309	5.81293	0.0007498	1.00052	0.998543	0.998993	1
CCNA_00804	4.2699	2.57325	5.75769	1.18369	1.08095	1.80683	5.51969	0.743043	3.46433	6.08278	complement(868374..868859)	3.52333	-0.235748	-1.17752	0.684527	0.935624	1
CCNA_00807	9.22299	10.6533	17.5576	10.2271	15.1765	8.97633	14.572	17.2535	22.9165	23.8141	complement(871633..872082)	17.5065	-0.530101	-1.44403	0.140247	0.699217	1
CCNA_00808	63.6826	4.63185	6.09638	2.84086	44.7513	5.20367	0	1.33748	0	6.84313	complement(872176..872310)	24.4006	2.91356	7.53476	0.0003471	0.0416986	1
CCNA_00809	5.95288	6.27811	9.9158	10.7816	8.70295	5.81886	9.27707	6.88882	7.39561	8.16229	complement(872590..873585)	8.32626	0.12981	1.09415	0.659789	0.925772	1
CCNA_00810	2.07491	5.47069	5.32833	5.36855	1.14904	4.30224	1.30386	4.73909	3.3143	5.49606	complement(873744..874886)	3.87831	-0.035446	-1.02487	0.934093	0.998993	1
CCNA_00811	10.2547	17.0417	22.7752	29.5476	14.8682	21.5388	30.9311	16.1822	21.5091	22.3693	complement(874918..875553)	22.5061	-0.27864	-1.21305	0.387025	0.829484	1
CCNA_00812	0	0	1.95955	3.80472	9.3811	5.57536	0	2.86602	5.0109	1.46639	complement(875775..876026)	3.02907	-0.0936057	-1.06703	0.906711	0.998993	1
CCNA_00813	4.30579	4.99513	3.2275	3.6207	4.19663	7.39737	6.71021	3.93376	3.82095	2.95194	complement(876155..877531)	4.96285	-0.344618	-1.26981	0.308894	0.79062	1
CCNA_00814	0.914979	0.643313	1.5241	1.77553	0	4.87844	0.919948	0.557282	0	0.570261	complement(877757..878080)	1.38519	-0.495441	-1.40975	0.585701	0.904229	1
CCNA_00815	7.14591	4.45002	1.92716	4.22607	2.53264	3.02383	2.66861	3.97927	3.91348	4.32644	complement(878273..879724)	4.05636	0.0349368	1.02451	0.915638	0.998993	1
CCNA_00816	0	0	2.57191	0	1.36808	2.74412	0	0	0	0.962315	complement(879721..879912)	0.787998	0.0501242	1.03535	0.966658	0.998993	1
CCNA_00817	0.669195	8.93958	14.7387	10.6773	2.96468	12.0254	4.93408	15.8958	14.569	13.6245	complement(879956..881284)	12.2097	-0.718036	-1.64494	0.120829	0.676136	1
CCNA_00818	0	2.59461	3.18732	1.32613	1.45323	2.18619	1.64904	2.49736	3.20199	3.06663	complement(881445..882167)	2.52024	-0.50935	-1.42341	0.33287	0.794141	1
CCNA_00820	1.76912	1.95462	1.96456	2.94257	1.56752	1.64694	2.03283	1.5393	1.61477	1.73266	complement(882223..883395)	2.03968	0.239982	1.18098	0.532027	0.881341	1
CCNA_00821	7.90542	0.463185	4.02361	2.13064	5.25342	5.07358	7.94835	1.20373	3.27379	2.87412	complement(883440..883889)	4.07471	-0.115858	-1.08362	0.834957	0.983506	1
CCNA_00822	47.2607	42.895	33.8747	33.3492	16.75	31.0523	6.91161	23.0279	12.8105	43.3795	complement(883961..884305)	34.8259	0.482056	1.39673	0.210118	0.733576	1
CCNA_00823	6.26829	2.59245	2.45675	4.77009	5.22728	1.09219	4.07798	0.449153	1.04705	3.4471	complement(884441..885244)	4.26297	1.02327	2.03253	0.0366695	0.477291	1
CCNA_00824	7.72649	11.4367	11.2896	5.26084	11.1698	7.95005	13.9014	9.1642	7.79474	8.61728	complement(885326..886054)	9.48554	-0.046122	-1.03249	0.890696	0.995494	1
CCNA_00825	2.43394	3.0803	2.43255	1.57437	1.72526	1.4419	2.93658	5.9297	3.4558	3.64068	complement(886217..886825)	3.48093	-0.702751	-1.62761	0.156585	0.715952	1
CCNA_00826	7.40329	3.8473	1.96593	3.3313	3.99283	2.28826	3.2363	2.35257	0.914041	2.20674	complement(886822..887742)	4.10813	0.769317	1.70446	0.0618309	0.575336	1
CCNA_00827	17.5159	14.0949	12.986	18.3375	24.4011	15.4151	23.617	12.8266	15.0943	15.7757	888079..891006	17.4671	0.007156	1.00497	0.983114	0.998993	1
CCNA_00828	5.67468	8.11721	7.49674	5.94892	6.24169	4.17324	8.26314	6.67415	7.77931	8.65893	891133..892647	7.10975	-0.130516	-1.09469	0.670162	0.927415	1
CCNA_00830	3.23404	5.17925	10.1754	4.99732	2.70631	6.5992	4.69675	6.34694	8.03567	9.63015	892954..894603	7.06174	-0.450847	-1.36684	0.209123	0.733576	1
CCNA_00831	19.8841	14.4039	12.0998	17.7337	25.9824	17.253	27.1609	15.2913	14.1161	16.7114	894504..897455	18.1065	-0.0840498	-1.05999	0.801576	0.971271	1
CCNA_00832	6.91724	24.7804	21.0325	20.028	4.66971	24.1971	17.8838	32.0995	32.2702	44.1382	complement(897582..898481)	30.1177	-1.00412	-2.00572	0.008908	0.286857	1
CCNA_00833	8.39951	3.82128	3.84072	1.91758	0	2.63436	3.97418	3.00932	2.45534	4.31117	898620..899219	3.59582	0.028872	1.02021	0.955652	0.998993	1
CCNA_00837	3.66671	8.50748	9.26333	9.60568	2.76154	8.68887	6.45158	7.03479	9.37104	10.8551	complement(903123..904739)	8.48027	-0.364554	-1.28748	0.31575	0.790776	1
CCNA_00838	6.00716	4.54034	5.25327	6.9942	7.18553	6.31676	10.8716	6.03694	7.03659	7.01993	complement(904900..906873)	7.45637	-0.361425	-1.28469	0.228727	0.754929	1
CCNA_00839	1.79234	2.18431	1.99035	2.00955	2.43508	2.61914	3.60415	2.54719	3.22346	2.53204	907095..909575	2.9052	-0.50984	-1.42389	0.106451	0.656876	1
CCNA_00840	1.84706	1.62331	1.70927	0.896064	1.09105	1.18541	0.619031	1.59372	1.20199	1.05525	909868..911793	1.43335	0.215926	1.16145	0.595391	0.909322	1
CCNA_00841	1.28335	1.80462	3.46103	2.49036	1.46199	1.955	2.21197	2.1216	2.73322	2.85659	complement(911803..913419)	2.37568	-0.169567	-1.12472	0.640664	0.922711	1
CCNA_00842	6.015	5.79988	7.25204	7.55915	5.93865	6.82133	3.6286	6.07099	7.44228	8.03324	complement(913509..915233)	6.51294	-0.0565745	-1.03999	0.84751	0.987357	1
CCNA_00843	4.90743	5.17555	4.58261	2.45288	2.76704	2.90724	3.36414	4.75514	4.9091	8.61956	complement(915317..916645)	4.91104	-0.381076	-1.30231	0.29714	0.784317	1
CCNA_00846	3.16601	4.99161	7.03155	6.95044	4.08032	5.68362	5.78764	5.60962	5.58497	6.57738	complement(917301..920390)	5.84864	-0.196356	-1.1458	0.534286	0.881341	1
CCNA_00847	17.7365	10.6889	10.9031	18.848	21.328	9.00635	14.0115	5.78716	8.99393	9.08031	920836..921303	15.9009	0.702837	1.6277	0.0305648	0.456526	1
CCNA_00848	7.18675	0	0	0	0	0	3.61289	1.0943	0	2.23957	complement(921330..921494)	1.43735	-0.200659	-1.14922	0.867573	0.990747	1
CCNA_00849	0	0.890741	4.22057	1.50238	0.187088	2.75194	0.636887	2.18626	1.79879	1.97398	complement(921731..923134)	1.86957	-0.432622	-1.34968	0.466768	0.85582	1
CCNA_00851	0.762091	3.0363	2.11571	1.31453	2.25082	2.85934	1.27705	2.63026	3.42648	1.89989	complement(926304..927470)	2.4186	-0.406246	-1.32523	0.345294	0.803495	1
CCNA_00852	10.1228	25.4187	14.7205	18.7081	11.959	19.7041	9.20846	13.7989	18.4792	14.4206	927638..928252	16.1858	0.0380748	1.02674	0.911557	0.998993	1
CCNA_00853	44.0048	20.8976	16.5031	24.2194	45.1466	32.0148	32.2126	17.1626	19.1824	20.9304	complement(928249..929016)	30.1543	0.221382	1.16585	0.50023	0.881006	1
CCNA_00854	2.04707	1.70096	1.03329	1.20375	1.64891	1.65371	1.87108	2.04022	1.05691	2.31971	929146..930738	1.78833	-0.365289	-1.28814	0.347356	0.803495	1
CCNA_00855	3.45517	1.94343	2.87766	3.7994	2.143	1.43283	1.73697	1.26265	4.16991	3.44549	complement(930735..931592)	2.84373	0.169799	1.1249	0.690544	0.93593	1
CCNA_00856	7.48896	10.4024	11.9674	11.3424	5.34081	12.5523	13.0391	9.67879	11.9298	13.5471	complement(931733..933355)	12.1494	-0.417566	-1.33567	0.185326	0.727631	1
CCNA_00857	36.3088	17.4057	17.2964	19.2158	23.0317	17.4768	13.4823	13.6959	16.4031	22.7581	complement(933527..934963)	22.6517	0.326768	1.2542	0.272277	0.779053	1
CCNA_00858	11.917	8.00218	8.10373	7.79503	10.559	8.24972	11.0394	8.0738	7.69968	9.84743	935330..937543	9.27541	-0.0387559	-1.02723	0.892045	0.99606	1
CCNA_00859	19.3629	25.8194	18.7217	20.5146	12.1278	18.1953	17.7898	16.2666	11.3761	20.8068	complement(937676..938563)	19.3093	0.133214	1.09673	0.670068	0.927415	1
CCNA_00861	229.38	253.072	244.487	293.432	324.823	272.99	339.761	236.38	272.977	278.583	complement(938979..939557)	280.138	-0.123152	-1.08911	0.745574	0.95095	1
CCNA_00867	3.03122	2.98371	4.37593	2.35286	3.76012	6.82383	4.87629	2.95394	2.15192	6.42331	946004..946492	4.64586	-0.545699	-1.45973	0.232518	0.75798	1
CCNA_00869	128.884	50.0296	46.4648	60.9372	78.1442	61.7474	83.232	42.9729	41.0528	43.9737	complement(947426..950383)	72.892	0.320188	1.24849	0.428934	0.842734	1
CCNA_00870	1.35367	1.42763	0.751609	0.875606	2.39882	0.801935	0	1.23671	0.480498	0.421837	complement(950449..950886)	1.36147	0.862954	1.81876	0.265471	0.779026	1
CCNA_00871	6.61105	1.71248	2.51154	0.225068	2.46639	2.47357	2.44888	1.90732	1.23508	3.68662	complement(950906..951757)	2.70531	0.0643311	1.0456	0.901983	0.997923	1
CCNA_00872	3.48769	15.5303	27.111	17.2958	5.15041	19.2842	16.3643	28.3231	19.8078	16.665	complement(951754..952008)	20.0889	-0.560361	-1.47464	0.193594	0.727631	1
CCNA_00873	0	4.17911	4.95045	3.60447	1.31665	1.54056	1.49405	3.39398	2.37359	2.54688	complement(952037..952834)	2.81014	0.288759	1.22159	0.576825	0.90397	1
CCNA_00875	10.2225	51.5094	34.0556	44.0822	40.7593	51.4759	34.2601	29.0555	31.4477	52.0314	complement(953751..953924)	39.6542	-0.167613	-1.1232	0.648662	0.924535	1
CCNA_00876	136.149	124.545	122.74	112.687	126.471	133.127	136.152	109.227	110.166	117.246	complement(953903..954307)	124.519	-0.0276065	-1.01932	0.93145	0.998993	1
CCNA_00877	26.7733	21.2198	17.5684	15.4288	16.39	15.2842	14.6829	15.7137	10.713	14.8661	complement(954339..954947)	19.4761	0.345986	1.27102	0.249462	0.767425	1
CCNA_00878	8.9081	6.99147	4.37099	4.55609	4.22182	4.41821	7.08187	5.29944	4.55919	5.55197	955220..956650	5.8097	0.0244982	1.01713	0.936012	0.998993	1
CCNA_00879	1.57061	3.1288	2.90688	1.43924	2.08745	2.86891	1.97393	2.39152	3.25211	2.44721	956807..959071	2.58674	-0.258458	-1.1962	0.430581	0.843664	1
CCNA_00880	6.08109	12.2922	12.1341	13.0297	7.07191	11.8208	17.5781	10.7641	12.4116	11.1332	complement(959391..960950)	12.7416	-0.362381	-1.28555	0.277963	0.779053	1
CCNA_00881	3.14957	1.93763	7.21365	2.54658	4.53482	3.49848	3.95834	4.31616	5.58985	2.69908	complement(960947..961699)	4.01238	-0.0789514	-1.05625	0.847784	0.987357	1
CCNA_00882	2.07725	2.71235	2.47151	1.5356	3.68107	6.68038	9.54757	4.87999	5.26672	5.73343	complement(961855..962853)	6.42162	-1.39117	-2.6229	0.0001404	0.0329237	0.573708
CCNA_00883	0.781168	1.37308	0.216867	1.76852	0.69215	0.694165	3.53435	0.951565	0	1.21716	complement(963045..963803)	1.27945	-0.370743	-1.29302	0.608942	0.916413	1
CCNA_00884	0	5.38587	4.25329	6.44147	0	6.35331	3.85095	6.99843	3.80673	7.63884	complement(963806..964192)	5.72965	-0.812325	-1.75604	0.148741	0.710653	1
CCNA_00885	8.63981	2.65762	2.39858	3.84214	0.478453	3.19898	0.54292	2.95999	1.91674	1.34619	complement(964182..964730)	3.60332	0.6417	1.56017	0.264873	0.778167	1
CCNA_00886	33.4935	6.68056	3.693	5.68513	9.89225	4.92535	5.25432	6.36588	4.04727	6.36609	964937..966184	11.8889	0.977036	1.96842	0.0242974	0.419699	1
CCNA_00887	1.27507	3.13771	1.41593	2.88668	2.82442	1.88843	0.640996	1.5532	1.35779	3.57609	966367..966831	2.30796	0.205014	1.1527	0.712033	0.943449	1
CCNA_00888	5.02463	4.71036	7.90463	6.50026	18.5502	10.9145	15.9977	10.2011	5.35063	8.35094	966956..967309	10.163	-0.305686	-1.23601	0.458006	0.852778	1
CCNA_00889	2.67075	14.5528	5.93161	9.06962	11.2404	11.4709	5.37051	5.28665	11.3761	7.90659	complement(967313..967756)	8.69304	0.016601	1.01157	0.96718	0.998993	1
CCNA_00890	0.321882	4.29993	2.68082	2.08206	2.85202	2.66963	2.91267	2.54861	2.51361	3.61103	complement(967847..968767)	2.85111	-0.221836	-1.16622	0.611328	0.916591	1
CCNA_00891	1.57856	0.665921	1.40236	0.816859	3.91629	1.87033	3.49169	1.53831	1.12065	1.77091	968889..969827	1.95838	-0.295097	-1.22697	0.573025	0.9019	1
CCNA_00893	2.22688	4.69709	5.10035	2.88087	3.69959	1.64905	2.23897	0.678158	1.77852	1.56139	972738..973802	3.72096	1.25043	2.37913	0.002612	0.144175	1
CCNA_00894	7.20546	11.7606	12.1451	12.3178	5.01628	12.3485	7.24459	13.9495	12.9709	11.5478	973984..975135	11.6123	-0.321787	-1.24988	0.328994	0.794141	1
CCNA_00895	0.74862	0.526347	2.07831	3.87389	1.32662	3.99145	4.51611	2.73575	1.59438	1.39973	975146..975541	2.84748	-0.637611	-1.55575	0.300804	0.787178	1
CCNA_00896	23.9075	192.745	269.47	163.922	53.664	188.843	106.566	250.939	242.14	192.215	complement(975549..975920)	196.14	-0.515642	-1.42963	0.278275	0.779053	1
CCNA_00897	0	0	3.99036	0	4.77583	1.06439	0	1.0943	0	3.35936	976013..976177	1.75324	0.506258	1.42036	0.643724	0.923733	1
CCNA_00898	7.72014	16.2839	13.7169	16.4792	8.20847	10.9765	3.49293	10.8148	9.04312	3.84926	complement(976253..977020)	12.4817	0.628939	1.54643	0.0779498	0.605204	1
CCNA_00899	3.87521	2.53	3.84226	3.939	5.15041	3.77157	0.834911	2.19167	1.96506	4.65793	complement(977024..978094)	3.86738	0.388547	1.30907	0.325871	0.79382	1
CCNA_00900	3.49085	3.02077	4.77108	6.07928	4.28268	6.44272	4.31976	5.07006	4.76581	4.76974	978293..980500	5.07362	-0.288808	-1.22163	0.329741	0.794141	1
CCNA_00901	4.25023	5.22951	2.94986	4.35292	2.82442	3.14738	2.49276	3.45156	5.78319	3.53194	complement(980770..981606)	3.92139	0.005856	1.00407	0.986761	0.998993	1
CCNA_00905	6.00919	4.225	5.37553	4.9667	4.73281	4.35104	2.68525	4.47332	4.02904	3.12102	complement(985509..986396)	5.06184	0.331203	1.25806	0.316127	0.790776	1
CCNA_00906	23.6515	19.1349	13.3121	19.6997	28.1331	17.0825	25.4087	16.576	15.4106	18.5774	complement(986466..987380)	20.7862	0.0778303	1.05543	0.799454	0.969906	1
CCNA_00907	10.5731	10.8648	9.70905	16.3086	16.5746	11.3228	20.4433	11.1456	12.4138	18.7552	complement(987377..988105)	14.8162	-0.264212	-1.20098	0.40412	0.833126	1
CCNA_00908	4.68084	6.94778	6.0643	8.41043	5.76033	9.0893	7.05939	7.44412	7.5691	8.26578	complement(988042..989181)	7.88554	-0.353484	-1.27764	0.219818	0.741695	1
CCNA_00909	3.61528	5.08374	8.6985	8.3147	3.55923	6.42526	6.86595	7.82914	6.55899	5.75824	complement(989266..990003)	6.68752	-0.198118	-1.1472	0.581992	0.90397	1
CCNA_00910	6.96952	13.1255	11.3328	15.6176	5.07257	17.6951	15.5163	13.1895	12.5462	14.1172	complement(990076..991266)	14.6129	-0.528183	-1.44211	0.0989375	0.642862	1
CCNA_00911	16.5532	19.75	25.9019	23.6858	22.667	32.3908	23.1995	21.6916	27.064	24.0725	complement(991329..991919)	25.6837	-0.288581	-1.22144	0.31969	0.79382	1
CCNA_00912	7.77219	5.85487	5.39427	8.25923	15.4946	7.39988	11.1634	6.08627	7.88232	5.19002	complement(991916..992983)	8.55504	0.107857	1.07763	0.740141	0.949874	1
CCNA_00913	5.02463	5.88795	0	2.16675	4.45205	2.97667	1.68397	4.08044	1.18903	0	complement(993033..993209)	3.50628	0.55943	1.47369	0.490118	0.87659	1
CCNA_00914	1.68439	0	0.93524	1.45271	0.994966	0.332621	0	0.341969	0.797189	2.0996	complement(993288..993815)	1.01346	0.284523	1.21801	0.72588	0.946749	1
CCNA_00915	2.33428	22.7034	21.6014	27.1783	12.7544	17.0553	21.1226	20.852	27.0668	19.8828	993947..994708	21.1959	-0.334231	-1.26071	0.395019	0.8325	1
CCNA_00918	2.72601	1.19789	0.378396	1.32247	2.11344	3.83546	1.71301	1.24524	0.725717	3.1856	995336..996205	2.141	-0.640793	-1.55919	0.241216	0.761485	1
CCNA_00919	59.2907	32.423	32.9205	28.1245	24.516	24.1971	43.7159	27.2845	28.0611	13.1388	996243..996467	35.4549	0.302619	1.23338	0.382644	0.82658	1
CCNA_00920	2.3972	1.3109	2.36625	2.75663	0.94401	0.946759	0.803405	2.75787	0.756363	2.32408	996464..997576	1.955	0.25046	1.18959	0.611471	0.916591	1
CCNA_00921	4.31347	0.827116	1.30637	0.507296	6.25407	0.929226	1.97132	1.19418	1.6703	0.244398	997744..998499	2.64166	1.0099	2.01377	0.113396	0.669925	1
CCNA_00923	8.01225	9.38889	3.46011	7.48604	0	7.38358	2.68525	6.50665	5.05605	4.43879	1001397..1001729	5.66946	0.00656	1.00456	0.989957	0.998993	1
CCNA_00924	18.0635	152.403	141.003	135.399	33.893	151.704	183.752	110.665	168.97	196.023	complement(1001739..1002017)	162.223	-0.778056	-1.71482	0.0836086	0.612743	1
CCNA_00925	3.82168	11.1318	9.09405	7.76919	7.73984	5.82178	6.03811	10.3082	10.4648	6.80532	complement(1002018..1002560)	7.91131	-0.0420565	-1.02958	0.908694	0.998993	1
CCNA_00926	1.82996	2.57325	5.92704	2.95922	2.70238	2.71024	1.8399	2.60065	1.94869	2.09096	complement(1002665..1003636)	3.19837	0.49254	1.40692	0.237733	0.758112	1
CCNA_00927	0.482038	1.69458	1.33823	0.623602	1.28132	1.42784	0	1.17437	1.36883	1.80258	complement(1003804..1004418)	1.15472	-0.213978	-1.15988	0.737789	0.949874	1
CCNA_00928	1.75676	3.0879	4.63325	3.40903	15.1765	3.90275	3.5326	2.94245	2.49432	2.1898	complement(1004428..1005102)	5.6127	0.830852	1.77874	0.0868068	0.621026	1
CCNA_00929	16.0728	12.1377	10.9074	13.477	7.91177	16.3986	9.27707	9.78937	13.7347	13.913	1005247..1006242	12.6225	-0.157585	-1.11542	0.594107	0.908426	1
CCNA_00930	29.2616	54.9751	45.8116	40.6477	17.8514	55.4153	28.4559	36.5209	41.2062	58.2995	1006253..1006870	43.9795	-0.269885	-1.20571	0.418918	0.840944	1
CCNA_00931	109.907	86.1109	65.6767	94.6834	36.4639	86.133	74.33	59.1359	59.831	86.162	1006846..1008048	78.5684	0.0207329	1.01447	0.955871	0.998993	1
CCNA_00933	12.2205	6.96259	10.5289	7.63215	3.92046	6.36589	4.66055	7.69976	8.37644	9.71754	1008616..1010022	8.25293	0.0723911	1.05146	0.826712	0.980833	1
CCNA_00934	64.1748	59.096	44.7769	66.4907	83.0282	73.6812	64.5233	52.2308	53.6224	50.6156	1010073..1010594	63.5133	0.02578	1.01803	0.928336	0.998993	1
CCNA_00935	3.90465	70.1113	87.3876	67.0278	18.363	90.9258	64.6257	73.9068	88.9169	87.4215	complement(1010693..1011679)	81.1593	-0.741008	-1.67134	0.140261	0.699217	1
CCNA_00936	34.9391	70.4703	62.5097	74.192	38.7752	95.7568	71.3223	73.7285	73.1592	58.0689	1011810..1012649	74.4071	-0.45988	-1.37543	0.183505	0.727631	1
CCNA_00937	0	0	0	0.710214	0	0.650458	1.10394	0	0	2.73725	complement(1012655..1012924)	0.89833	-1.99969	-3.99914	0.157556	0.715952	1
CCNA_00938	2.24586	8.2461	7.75903	6.45649	5.74869	11.5309	9.7849	5.01554	6.02321	6.68761	complement(1013086..1014273)	7.80842	-0.365453	-1.28829	0.281839	0.779589	1
CCNA_00939	0	2.06779	1.95955	2.28283	1.04234	1.7423	0.591395	2.50777	1.25273	2.19958	1014509..1015012	1.65875	-0.180305	-1.13312	0.769897	0.958851	1
CCNA_00940	6.12146	5.73858	7.20236	7.82492	7.7484	7.42559	6.30124	6.92411	7.96719	7.53956	1015105..1017138	7.23154	-0.128744	-1.09334	0.634476	0.922486	1
CCNA_00941	0.484401	3.0652	2.42062	2.34997	1.5022	1.14787	2.67867	1.91771	2.92303	1.20761	complement(1017151..1018374)	1.97498	0.0130157	1.00906	0.977351	0.998993	1
CCNA_00944	0.985714	2.59892	0.684133	0	1.52843	0.729941	2.47767	1.80109	1.04967	1.53586	1021867..1023069	1.51885	-0.438536	-1.35523	0.458225	0.852778	1
CCNA_00945	5.26488	1.42372	1.79893	2.09571	1.7942	0.479846	0.81438	2.95999	1.15004	3.53375	1022922..1023653	2.47549	0.273192	1.20848	0.624602	0.920775	1
CCNA_00949	2.63514	37.9812	35.8467	28.9767	4.66971	30.4415	13.2473	45.7417	40.2209	48.4494	1026741..1026965	35.6201	-0.723363	-1.65103	0.132925	0.698838	1
CCNA_00957	30.8055	16.8772	12.6617	15.3976	26.7634	17.3017	25.3414	13.7674	17.6092	16.8308	1034478..1035959	20.5011	0.082782	1.05906	0.78547	0.964828	1
CCNA_00958	5.15376	9.13767	6.46963	11.3054	2.97813	10.487	9.68762	6.55091	5.24952	9.63625	complement(1035956..1037278)	8.32226	-0.290363	-1.22295	0.398344	0.8325	1
CCNA_00959	3.24753	2.60949	1.28797	2.10063	0.822131	2.47357	0.932905	1.97796	0.988066	2.60232	1037402..1038040	2.01355	-0.0223425	-1.01561	0.965485	0.998993	1
CCNA_00961	5.12389	5.1465	10.5671	5.20824	7.13427	8.67278	5.88767	6.24156	4.67684	9.12417	1038075..1038479	6.92061	-0.101103	-1.07259	0.798346	0.969422	1
CCNA_00962	2.65283	9.79217	13.2566	7.72179	2.93815	13.3584	2.00042	13.7338	9.88729	7.44018	complement(1038480..1038926)	9.28403	-0.38751	-1.30813	0.388505	0.830374	1
CCNA_00963	0	0	0.39473	3.67881	2.51963	1.26348	0	2.16498	1.00939	0.886161	complement(1038937..1039353)	1.31863	0.145303	1.10596	0.862579	0.989785	1
CCNA_00964	0	125.508	157.523	136.086	11.2977	143.521	99.3544	229.097	183.302	158.937	complement(1039648..1039740)	162.842	-0.955814	-1.93967	0.0769718	0.604673	1
CCNA_00965	0	2.3855	1.17741	1.37166	1.50312	1.25625	1.27924	1.03324	0	2.11462	complement(1039915..1040613)	1.28754	0.161106	1.11814	0.807852	0.972736	1
CCNA_00966	5.76068	13.3971	4.6748	6.30594	5.10422	8.13802	7.12857	5.39789	8.17923	6.9045	1040719..1041387	7.14964	-0.0744645	-1.05297	0.839451	0.98539	1
CCNA_00967	163.264	67.1283	67.5903	68.8599	160.31	80.8831	112.794	71.2352	89.4701	67.5387	complement(1041399..1042019)	105.43	0.225576	1.16924	0.534507	0.881341	1
CCNA_00968	5.33616	7.08673	4.16993	7.92599	6.82944	6.6737	4.76901	7.10201	5.1913	7.88329	1042164..1043663	6.32386	-0.11204	-1.08076	0.724256	0.946576	1
CCNA_00969	5.55534	3.3141	2.61719	5.66235	8.50213	5.08621	2.87738	3.89623	6.69259	5.14109	complement(1044122..1045882)	5.13022	-0.0007663	-1.00053	0.998208	0.998993	1
CCNA_00970	15.3084	7.38245	4.63131	9.14039	8.52094	7.49933	9.27439	4.66191	5.71253	7.09457	1046120..1049140	8.9967	0.294508	1.22647	0.333628	0.794141	1
CCNA_00971	4.97405	20.5169	20.4372	27.2408	10.8712	26.1275	20.6711	23.2263	20.7162	32.8608	complement(1049148..1050041)	24.7204	-0.596735	-1.51229	0.10149	0.649821	1
CCNA_00972	201.669	99.254	111.974	105.662	305.556	93.1881	231.151	99.492	144.6	155.856	1050224..1050370	164.823	0.10782	1.0776	0.754332	0.953285	1
CCNA_00973	19.6182	0.510866	2.82406	5.16994	8.36942	3.01315	2.92219	3.09783	3.09497	3.62283	complement(1050375..1050782)	7.2985	1.0164	2.02287	0.0797108	0.605414	1
CCNA_00974	73.3647	53.6874	56.8418	55.5056	66.8285	65.6926	60.9675	49.6425	55.4047	64.096	1051388..1054555	61.2456	-0.0285436	-1.01998	0.940175	0.998993	1
CCNA_00977	62.0316	17.2427	16.8207	28.4604	53.0455	20.0835	25.3825	14.4975	14.8498	22.927	1057369..1057779	35.5202	0.751803	1.6839	0.0311128	0.456526	1
CCNA_00978	24.9053	19.2052	12.9362	16.1097	22.779	11.4227	13.7319	8.80778	10.8366	16.5237	1057794..1058162	19.1871	0.526832	1.44076	0.0849203	0.613981	1
CCNA_00979	4.95465	5.80594	3.20952	5.34144	4.14615	4.40282	4.1513	2.0118	3.5174	3.08799	1058314..1059390	4.69154	0.388962	1.30945	0.230002	0.755232	1
CCNA_00982	2.76413	9.23131	6.90639	6.25783	2.44915	6.14069	9.727	3.36708	1.96231	3.87618	1061622..1062050	5.52176	0.181963	1.13443	0.696673	0.938006	1
CCNA_00983	13.0453	10.4331	8.05809	10.9696	13.437	8.88745	11.9684	5.56179	9.72413	7.92719	complement(1062171..1063988)	11.1886	0.276577	1.21132	0.362998	0.810842	1
CCNA_00984	8.59285	12.4607	7.45481	13.5481	8.56536	13.6808	19.9789	16.6821	16.7756	17.4054	complement(1064062..1064613)	16.9046	-0.769668	-1.70488	0.0132035	0.354442	1
CCNA_00986	2.16164	8.90184	10.6306	7.79016	8.20847	12.9888	10.2459	12.4135	10.0844	12.5101	1066823..1067782	11.6486	-0.651767	-1.57109	0.066382	0.586216	1
CCNA_00987	8.71922	3.0652	3.2275	2.81997	0	10.3308	1.46109	6.19567	3.09497	6.33996	1067843..1068046	5.4845	-0.822526	-1.7685	0.18735	0.727631	1
CCNA_00988	8.2177	13.4333	12.2054	11.8271	9.46562	12.901	12.8066	19.1446	18.2309	7.9386	complement(1068127..1069569)	14.2043	-0.435837	-1.3527	0.194193	0.727631	1
CCNA_00989	23.3796	19.616	10.2985	17.5425	40.1878	19.1136	20.2156	14.3346	14.6059	12.7256	1069657..1071558	22.2049	0.373392	1.29539	0.294957	0.783313	1
CCNA_00990	11.9588	20.7991	19.5706	17.5065	12.2691	23.864	18.9849	15.7175	25.4694	13.3376	complement(1071582..1072052)	19.4747	-0.277555	-1.21214	0.384157	0.826809	1
CCNA_00991	9.9481	2.79776	0.736476	3.86089	6.46394	2.35737	3.33404	2.42362	0.941647	2.8934	complement(1072114..1072560)	4.76143	0.816043	1.76057	0.151424	0.711814	1
CCNA_00992	11.9868	9.86667	11.8501	9.64462	10.1027	13.3363	11.7579	12.8208	18.2646	11.6617	complement(1072625..1073638)	13.5683	-0.416014	-1.33424	0.166262	0.718816	1
CCNA_00993	5.00831	13.0017	11.4441	18.5652	4.94961	15.4056	13.1698	10.3244	12.1707	14.2865	complement(1073710..1075248)	13.0714	-0.347752	-1.27258	0.333084	0.794141	1
CCNA_00994	9.41968	5.87312	6.61172	5.63317	7.4014	5.36979	6.07563	3.89697	5.04695	4.54157	complement(1075409..1077076)	6.98782	0.4052	1.32427	0.186983	0.727631	1
CCNA_00995	4.21919	7.3381	8.75413	7.75649	5.5092	7.10388	7.59112	8.65604	7.40938	7.47362	1077242..1078576	7.64681	-0.215042	-1.16074	0.504066	0.881341	1
CCNA_00996	3.01478	2.5907	2.78987	2.81678	2.67123	1.58756	3.03115	4.48848	4.2805	2.50528	1078807..1079691	3.1786	-0.26112	-1.19841	0.520566	0.881341	1
CCNA_00997	6.29721	5.27895	5.64812	5.95326	2.78981	6.45676	9.98414	5.6056	4.47051	3.92474	1079915..1081138	6.08835	-0.258423	-1.19617	0.439099	0.847876	1
CCNA_00998	21.1752	16.8732	14.1088	12.7839	25.0163	20.4894	23.4193	13.327	12.5273	17.5966	1081367..1081786	17.9915	-0.0436733	-1.03073	0.890948	0.995494	1
CCNA_01000	0	3.30847	0	6.08755	0	2.78768	0	8.59807	4.45414	0	1082537..1082725	3.16798	-0.826144	-1.77294	0.383467	0.82658	1
CCNA_01001	1.95035	3.19963	3.6097	1.26156	0.288016	2.69598	0.326824	3.95964	2.76918	5.6726	complement(1083029..1083940)	3.08484	-0.626215	-1.54351	0.235863	0.758112	1
CCNA_01007	12.3522	13.6474	19.5955	14.8384	23.4528	12.5446	8.87093	17.1961	11.2745	26.3949	complement(1086496..1086663)	16.7773	0.0363982	1.02555	0.928263	0.998993	1
CCNA_01008	3.9171	3.12963	5.23959	4.72196	2.68193	5.69591	3.04329	4.33777	4.04484	2.66327	complement(1086800..1088464)	3.95701	-0.0685523	-1.04866	0.838761	0.984863	1
CCNA_01009	0.363301	3.8315	3.63093	2.34997	2.2533	4.08928	1.82637	4.2042	2.06331	4.52854	complement(1088589..1089404)	3.34234	-0.445592	-1.36187	0.331445	0.794141	1
CCNA_01010	1.53802	10.0026	9.18015	10.1972	3.40689	10.3643	10.438	7.49404	9.2809	10.9037	complement(1089523..1091064)	9.6962	-0.52039	-1.43434	0.177218	0.724334	1
CCNA_01011	2.70397	2.24679	0.955403	3.33907	3.04925	2.33	3.21295	2.5452	2.26862	2.14486	complement(1091049..1092254)	2.50033	-0.119131	-1.08608	0.749801	0.952215	1
CCNA_01012	1.28893	1.81246	1.31205	2.91805	3.2358	2.41801	1.7279	3.00932	2.13508	1.33887	1092339..1093718	2.12584	-0.111468	-1.08033	0.775142	0.961279	1
CCNA_01013	2.0936	4.41596	8.13712	4.33351	1.48402	5.20918	1.68397	3.31536	5.94514	6.52417	1093715..1094422	4.53556	-0.161113	-1.11815	0.713227	0.943582	1
CCNA_01014	15.5374	6.55451	4.14094	8.84417	12.1148	8.10005	8.12332	6.0565	6.61818	3.48612	complement(1094791..1095267)	9.43836	0.41125	1.32984	0.281424	0.779589	1
CCNA_01015	25.8474	9.02469	7.32217	6.59665	16.3585	6.97912	10.2537	7.49654	6.11651	7.56154	1095313..1096998	13.0299	0.647953	1.56694	0.0692635	0.590107	1
CCNA_01016	0.978394	0.687899	1.62973	1.89859	0.288967	2.51167	0.327902	1.19181	0	0.406523	1096995..1097903	1.09672	0.222401	1.16667	0.748914	0.952215	1
CCNA_01017	3.53585	3.40193	2.68654	4.81501	1.8138	2.64593	4.49059	4.30713	4.22766	4.40744	1098179..1099771	4.01575	-0.354939	-1.27893	0.286443	0.781233	1
CCNA_01018	4.81255	7.66962	8.19449	8.3012	7.67545	6.65242	6.45158	6.44855	8.19966	9.3982	complement(1099898..1100821)	7.43008	-0.0536299	-1.03787	0.867266	0.990747	1
CCNA_01019	3.64545	5.40078	3.83132	4.96869	3.46075	5.63045	6.67599	4.83712	6.10023	4.78749	complement(1100992..1103268)	5.60626	-0.416445	-1.33463	0.144249	0.701621	1
CCNA_01020	2.55563	3.99298	3.78396	3.67352	4.52881	3.36444	5.13902	3.45899	4.63653	4.95537	complement(1103332..1104375)	4.31087	-0.234535	-1.17653	0.477044	0.865715	1
CCNA_01021	4.37921	6.22489	7.98168	6.77372	6.41072	5.9218	8.51883	5.8563	5.60951	7.65402	1105026..1108139	6.71209	-0.11275	-1.08129	0.704848	0.941265	1
CCNA_01022	10.0558	3.94297	4.08016	3.7526	8.56722	5.49898	10.3049	4.12236	4.66769	4.09784	1108366..1109898	6.07975	-0.00347	-1.00241	0.992187	0.998993	1
CCNA_01023	4.39615	4.43475	6.36759	6.30538	2.87905	7.36012	3.8435	6.05357	6.6489	5.9563	1109908..1111458	5.97248	-0.347429	-1.27229	0.275571	0.779053	1
CCNA_01024	136.548	40.4234	44.8915	61.9823	80.6585	46.1234	58.4083	44.8663	48.8943	40.6855	complement(1111617..1112111)	72.9008	0.493098	1.40746	0.120121	0.676136	1
CCNA_01025	27.0799	18.0375	15.8271	19.0529	41.6738	23.3602	22.4503	14.4679	20.5736	26.0565	complement(1112124..1112747)	24.3342	0.099164	1.07115	0.748743	0.952215	1
CCNA_01026	684.313	174.273	149.514	214.662	638.436	217.09	272.397	169.275	166.028	155.254	complement(1112731..1113450)	372.24	0.818422	1.76348	0.0745187	0.603243	1
CCNA_01027	197.636	189.64	119.629	191.234	188.032	195.777	235.356	106.56	135.705	145.388	complement(1113648..1114013)	177.234	0.0468451	1.033	0.888102	0.995494	1
CCNA_01028	16.8982	12.5267	11.1163	15.4452	24.4118	12.7311	19.5754	11.7464	15.1259	16.3701	1114031..1115644	16.0796	0.0110991	1.00772	0.969062	0.998993	1
CCNA_01029	13.4577	7.29922	7.25873	11.4408	25.8923	8.08644	8.79499	7.61113	7.64309	7.06946	complement(1115733..1118816)	13.0698	0.648252	1.56727	0.0500703	0.530038	1
CCNA_01030	12.9518	2.69817	6.92502	3.72345	4.25034	5.68362	4.82303	3.21384	4.08656	6.57738	complement(1118884..1119501)	6.10976	0.206042	1.15352	0.609073	0.916413	1
CCNA_01031	26.9014	10.8441	9.95779	12.0646	21.4523	11.687	12.0812	11.6878	9.93087	13.5248	1119701..1121353	16.244	0.350475	1.27498	0.251139	0.767425	1
CCNA_01032	3.99264	2.45629	3.87952	9.03909	7.51752	2.3653	2.50895	4.25561	4.96029	7.15418	1121440..1122033	5.37701	0.233796	1.17593	0.585233	0.90397	1
CCNA_01033	44.9442	83.7082	76.1864	105.505	103.644	86.4013	84.3914	71.2449	85.7891	72.3476	1121997..1122992	82.7977	-0.0106374	-1.0074	0.976879	0.998993	1
CCNA_01034	4.33174	5.90085	5.86255	6.42111	4.4778	4.49084	5.62555	6.26599	5.25344	5.96196	1123256..1126540	5.51956	-0.0845587	-1.06036	0.781158	0.964029	1
CCNA_01035	10.0227	2.75269	3.39117	3.34285	3.0527	2.13383	1.25964	2.86148	4.55826	3.61135	1126541..1128433	4.51243	0.493642	1.40799	0.206648	0.733576	1
CCNA_01036	8.73757	5.92389	6.23756	8.27586	7.09672	7.88766	7.0071	6.33542	5.83375	7.6499	complement(1129199..1132048)	7.25432	-0.0306376	-1.02146	0.912077	0.998993	1
CCNA_01037	31.1237	12.3091	21.3853	17.8672	27.577	19.8211	10.1701	19.9042	21.8191	17.7005	complement(1132130..1132891)	22.0525	0.189025	1.13999	0.541233	0.887049	1
CCNA_01038	0.760137	6.94778	5.06469	4.91687	0.673515	5.85413	7.64265	6.48162	5.93599	11.3701	complement(1132998..1133387)	7.4569	-0.966683	-1.95434	0.0400487	0.495731	1
CCNA_01039	59.2006	29.4371	23.2468	38.8757	54.4489	38.6719	44.8113	29.065	29.5632	27.9181	1133616..1134932	41.0418	0.176592	1.13021	0.609697	0.916452	1
CCNA_01040	1.62589	14.4798	14.745	14.6068	5.12216	12.5216	7.2654	12.1033	17.8267	13.9615	1134929..1136569	12.7357	-0.370963	-1.29322	0.382744	0.82658	1
CCNA_01041	63.6826	4.63185	19.5084	4.26128	15.5657	10.4073	6.62363	9.36234	10.9126	10.949	complement(1136570..1136704)	21.53	0.971647	1.96108	0.097259	0.636703	1
CCNA_01042	86.5843	20.0417	15.0358	22.7405	34.0967	18.5052	20.1814	17.2168	16.1048	24.9462	complement(1137267..1139762)	35.6998	0.749575	1.6813	0.0604757	0.570539	1
CCNA_01043	54.1904	28.0152	15.9293	16.4953	129.923	19.8285	27.2423	13.5905	12.4464	15.8937	complement(1139759..1139944)	48.9107	1.37644	2.59627	0.003249	0.16505	1
CCNA_01044	16.3916	94.503	94.9129	98.1509	20.3331	83.234	62.1554	79.5831	93.4261	64.7989	1140124..1140756	76.6395	-0.284978	-1.21839	0.523252	0.881341	1
CCNA_01045	1.71857	3.62493	4.77108	5.00238	6.09092	1.01811	4.31976	3.14016	6.10023	2.67775	complement(1140749..1141093)	4.24158	0.324789	1.25248	0.536222	0.882162	1
CCNA_01046	38.0766	12.1108	20.3865	17.8857	34.5408	25.2426	20.9647	17.6694	19.3081	16.6684	complement(1141093..1141746)	24.6001	0.197772	1.14693	0.532967	0.881341	1
CCNA_01047	17.4899	13.0655	11.3498	15.697	22.083	16.8371	13.5184	10.9854	13.5028	12.195	1142237..1144948	15.937	0.163614	1.12009	0.619749	0.920775	1
CCNA_01048	0	0.78952	0	2.90542	3.97986	0.665242	0	0	0.797189	0	1145106..1145369	1.53496	1.92717	3.80309	0.115288	0.671829	1
CCNA_01049	3.68265	3.88385	5.79346	3.17611	0.543832	1.81805	0	4.85978	3.92158	2.67775	1145672..1146154	3.41598	0.262997	1.19997	0.649561	0.924541	1
CCNA_01050	4.91359	6.52554	5.65852	6.2389	6.44987	5.60616	6.40406	7.31549	4.90939	5.33084	1146283..1147911	5.95728	-0.0465796	-1.03281	0.880305	0.992477	1
CCNA_01051	12.8768	10.0595	10.6981	11.1674	13.8604	12.4315	13.1386	10.1666	11.5115	13.7919	1148357..1151464	12.208	-0.139546	-1.10156	0.666795	0.927415	1
CCNA_01052	6.56052	2.30632	2.50432	2.65225	1.45323	1.21455	0.412259	1.99789	1.74654	3.83329	1151554..1152276	3.09533	0.552214	1.46633	0.28233	0.779795	1
CCNA_01053	4.55258	6.21346	6.83984	5.02346	2.6101	8.56701	7.00058	7.66603	6.84416	6.67623	1152201..1153307	7.3508	-0.563458	-1.47781	0.0892449	0.626401	1
CCNA_01054	52.7687	21.816	22.9346	25.5677	39.5758	24.119	28.2167	19.6208	22.7295	23.2803	1153331..1154830	32.5326	0.364675	1.28759	0.278961	0.779053	1
CCNA_01055	3.63468	17.8885	13.6223	17.1921	7.04481	14.1306	6.39523	11.7606	15.3207	14.0166	complement(1154844..1156148)	12.3248	-0.101243	-1.0727	0.791884	0.965975	1
CCNA_01056	1.35988	6.53346	5.41124	7.18359	2.00819	9.26456	6.38056	6.48799	4.34432	5.08526	complement(1156159..1157466)	6.31254	-0.512703	-1.42672	0.187594	0.727631	1
CCNA_01057	7.5252	10.8603	9.67602	13.0657	10.7034	14.782	15.3312	10.1316	14.621	12.2189	complement(1157551..1159047)	13.4169	-0.408773	-1.32756	0.182249	0.727631	1
CCNA_01058	122.534	40.9919	48.2833	41.5475	87.557	43.9059	38.7482	36.1119	35.0763	54.8135	complement(1159130..1159429)	68.1828	0.595521	1.51102	0.067296	0.586216	1
CCNA_01062	6.06244	7.03303	6.90051	5.68607	4.29727	10.0562	7.31443	8.67719	8.3925	9.82388	1166270..1167247	8.85283	-0.62177	-1.53876	0.0420538	0.507775	1
CCNA_01064	85.2702	21.4783	17.4042	21.8219	63.0787	21.8743	25.9069	17.4735	25.4586	21.8539	1167891..1169006	41.8107	0.775713	1.71204	0.0436403	0.512272	1
CCNA_01065	7.99681	11.4458	13.7961	11.269	8.60386	12.182	9.476	9.21932	13.99	12.638	1169010..1170047	11.5011	-0.152772	-1.1117	0.60187	0.912296	1
CCNA_01066	3.99841	6.62649	5.07444	5.91161	4.55499	4.22986	7.17879	4.52268	4.86608	7.29802	1170058..1171095	5.61909	-0.111823	-1.08059	0.721582	0.946576	1
CCNA_01068	4.59618	9.85615	12.5047	9.06761	5.29414	10.2107	9.93544	10.3577	11.2571	13.0338	complement(1172841..1174130)	10.9589	-0.43469	-1.35162	0.201219	0.731855	1
CCNA_01069	39.1797	29.3109	29.0412	33.208	36.7671	33.8442	37.0639	35.9708	33.0211	30.4332	1174284..1175819	34.0666	-0.110782	-1.07981	0.726444	0.94683	1
CCNA_01070	11.0676	27.7911	14.7045	17.6417	12.258	19.6699	24.2425	20.4634	21.607	25.128	complement(1176508..1177257)	22.2221	-0.457739	-1.37339	0.120605	0.676136	1
CCNA_01071	9.71639	6.5408	5.62449	4.814	9.7082	6.49098	6.65134	5.79201	8.07196	4.2519	complement(1177299..1178732)	7.28078	0.118709	1.08576	0.716094	0.944236	1
CCNA_01072	442.78	12.025	2.11029	2.45843	101.027	9.00635	11.464	8.10203	9.44363	8.29072	complement(1178906..1179061)	112.08	3.38533	10.4493	1.119e-05	0.009141	0.0457034
CCNA_01073	30.1734	24.3968	15.4969	17.0777	30.0768	15.1939	12.1349	16.5398	19.8141	19.7458	complement(1179165..1179557)	23.4443	0.356365	1.2802	0.248358	0.767425	1
CCNA_01074	0	36.2493	25.0482	50.0238	15.2273	26.7254	19.4389	23.5512	50.3269	45.5217	complement(1179617..1179754)	33.1128	-0.422064	-1.33984	0.362753	0.810842	1
CCNA_01075	6.39827	0.99968	2.36838	4.13866	3.77944	3.36928	2.14434	3.03097	1.51409	1.77232	complement(1179849..1180265)	3.53689	0.373873	1.29583	0.477405	0.865986	1
CCNA_01076	2.90641	2.38404	3.49645	4.38662	0.429201	1.43483	0	0.295032	0.687771	2.11332	complement(1180276..1180887)	2.72054	1.42961	2.69374	0.0189056	0.38771	1
CCNA_01077	11.1364	6.34319	4.38313	6.38281	10.242	4.84364	4.53544	5.3232	4.70353	5.35931	complement(1180973..1183075)	7.69751	0.511504	1.42554	0.110485	0.661778	1
CCNA_01078	30.3146	32.1093	25.3571	30.0497	27.2089	22.157	45.5209	26.3766	31.3032	35.3335	1183239..1183991	32.1382	-0.203947	-1.15185	0.473092	0.862484	1
CCNA_01079	0	22.3742	5.57974	19.5008	0	10.9145	13.4718	12.2413	7.13417	9.39481	complement(1184014..1184190)	10.6313	-0.184877	-1.13672	0.764805	0.956825	1
CCNA_01080	0	1.10869	0.583696	0.679992	0.465729	1.24556	0.528481	1.28056	1.49261	3.93116	1184254..1184817	1.69567	-1.53163	-2.89112	0.0390356	0.493685	1
CCNA_01081	4.56082	6.14611	2.9544	6.39193	2.3573	7.43024	8.40691	7.40757	4.04727	4.50067	1184863..1185642	6.35853	-0.55414	-1.46829	0.123503	0.681152	1
CCNA_01082	0.859285	6.6457	5.56626	5.92874	1.52273	5.93897	4.89572	7.32705	6.9136	9.10434	complement(1185664..1186698)	6.83594	-0.756032	-1.68884	0.0638234	0.580501	1
CCNA_01083	116.974	33.5879	26.9379	43.3188	81.8869	42.5835	49.6772	29.8213	30.2164	34.7825	1186885..1188876	60.5411	0.585924	1.501	0.155672	0.715952	1
CCNA_01084	368.648	179.428	190.837	203.859	286.898	232.034	256.344	207.877	250.302	242.915	1188873..1190108	245.934	-0.0454279	-1.03199	0.908979	0.998993	1
CCNA_01085	141.756	50.6609	36.7416	46.798	101.107	40.2471	52.6342	31.8845	36.3291	33.3603	complement(1190105..1191112)	75.4129	0.848913	1.80114	0.0210415	0.40001	1
CCNA_01087	57.058	41.2797	47.9803	33.9655	15.3866	34.2919	19.5383	29.2119	30.2332	34.7883	1193276..1193992	39.134	0.318941	1.24741	0.315081	0.790776	1
CCNA_01088	235.254	109.349	79.1837	138.371	187.054	115.752	134.919	91.6476	87.6908	112.328	complement(1194028..1194555)	149.842	0.367176	1.28983	0.302774	0.78779	1
CCNA_01089	1.57688	5.42025	5.44783	5.43994	1.86291	6.33159	4.05169	6.18939	5.84606	6.44274	complement(1194604..1196295)	5.77229	-0.578145	-1.49293	0.101065	0.649821	1
CCNA_01090	44.3275	8.66572	10.085	11.1894	14.7525	7.68594	6.52217	6.32156	4.60521	8.49027	complement(1196289..1197659)	17.804	1.26768	2.40774	0.0006859	0.0628842	1
CCNA_01091	16.0516	23.6295	39.8276	28.5528	13.3335	22.8816	14.6258	19.8585	26.3518	22.1968	complement(1197735..1198325)	24.279	0.152742	1.11168	0.647582	0.924535	1
CCNA_01092	1.95679	2.7516	4.34594	2.53146	0	1.73885	1.96741	1.19181	2.77832	1.21957	complement(1198379..1198681)	2.31715	0.475588	1.39049	0.481592	0.871259	1
CCNA_01093	3.99264	2.80718	1.10843	1.2913	6.1909	2.3653	5.0179	0.607944	0.708613	1.24421	complement(1198666..1198962)	3.07809	0.571048	1.4856	0.423428	0.841024	1
CCNA_01094	9.88178	8.33733	7.68144	2.55677	3.50228	0	5.96126	4.81492	2.80611	3.69529	complement(1199089..1199238)	6.39192	0.866522	1.82326	0.207964	0.733576	1
CCNA_01095	10.4994	3.90813	3.42921	4.63415	6.12899	3.4393	2.48386	2.18176	2.98149	3.38735	complement(1199533..1201932)	5.71997	0.852053	1.80507	0.0111842	0.326339	1
CCNA_01096	32.5712	25.4234	23.1424	19.64	18.5875	17.497	18.3167	19.1655	18.42	27.8695	complement(1202090..1203163)	23.8729	0.149051	1.10884	0.588444	0.905981	1
CCNA_01097	34.0465	34.447	5.99392	42.4338	21.3374	35.9119	31.7266	15.1731	8.84277	13.4562	complement(1203412..1203768)	27.6517	0.313588	1.24279	0.436427	0.847802	1
CCNA_01098	4.42468	6.22189	4.9135	9.54019	0	5.2425	2.9658	5.38984	5.23527	3.67691	complement(1203784..1203984)	5.02005	0.14189	1.10335	0.79835	0.969422	1
CCNA_01099	5.72496	3.85015	4.42256	3.86414	2.42601	2.80172	3.25342	2.72886	3.18073	4.34375	complement(1204106..1205296)	4.05757	0.245724	1.18569	0.445034	0.850132	1
CCNA_01100	23.5134	25.5004	23.3805	23.2614	25.736	26.0386	28.5856	24.2431	26.0754	29.501	complement(1205363..1207291)	26.8887	-0.209938	-1.15664	0.513749	0.881341	1
CCNA_01101	139.14	14.3747	11.6672	8.81645	33.2113	12.7849	17.1301	6.91799	3.62859	6.37119	complement(1207424..1207945)	41.4419	1.99657	3.99049	0.0001698	0.0329237	0.693794
CCNA_01102	11.364	10.0743	11.5222	11.8251	11.8202	17.8551	5.96126	8.12518	7.71679	11.7018	1208217..1208816	11.3211	0.04278	1.0301	0.897246	0.996733	1
CCNA_01103	69.5384	20.586	17.2731	26.633	42.4273	24.7536	30.3583	16.1612	23.1677	15.5871	complement(1208972..1209943)	35.2916	0.569791	1.48431	0.0962738	0.636703	1
CCNA_01104	8.08739	12.2608	13.7519	14.3859	8.28544	19.0147	12.197	12.6222	11.3034	15.4364	complement(1209940..1211112)	14.1147	-0.356477	-1.2803	0.23513	0.75798	1
CCNA_01105	4.75412	16.9516	13.764	17.3526	6.01766	10.461	7.85275	12.6164	10.3662	8.67737	1211168..1212040	11.768	0.182382	1.13476	0.626583	0.920775	1
CCNA_01108	20.6588	5.08374	7.0735	10.0222	16.7792	8.36304	6.92365	2.72622	8.06633	3.21889	complement(1212651..1213511)	11.9235	0.92103	1.89347	0.0219997	0.408495	1
CCNA_01109	15.2282	13.3835	9.83386	12.2057	15.2528	13.336	13.1474	11.0896	13.0435	14.8554	1213981..1215771	13.1808	-0.0953967	-1.06836	0.716733	0.944629	1
CCNA_01110	5.75638	6.74542	3.72885	5.99889	3.40027	5.68362	3.21535	6.42768	4.99469	3.38835	1215774..1216700	5.12596	0.00423	1.00294	0.990404	0.998993	1
CCNA_01111	2.41019	3.95402	1.78431	1.55901	2.13554	2.85567	4.84656	0.978642	1.71104	3.50502	1217028..1217396	2.77939	-0.23071	-1.17341	0.685555	0.935624	1
CCNA_01112	0.403338	14.1791	10.7495	15.1319	6.43276	11.4693	17.8432	9.82637	11.4535	9.55245	1217396..1218130	12.029	-0.380136	-1.30146	0.360677	0.809098	1
CCNA_01113	0.938144	1.9788	2.60447	2.02276	0.831237	0.555771	0.943238	1.90464	2.88603	2.14389	complement(1218139..1219086)	1.68671	-0.0269882	-1.01888	0.958818	0.998993	1
CCNA_01115	0.37431	1.57904	0.623494	1.21059	1.65828	3.32621	0.752685	1.1399	2.12584	2.0996	complement(1219547..1220338)	1.88884	-0.906988	-1.87513	0.0989865	0.642862	1
CCNA_01117	2.99448	5.1465	1.66265	4.94998	5.60129	2.75952	2.00716	2.02648	4.48788	3.93998	complement(1222305..1223195)	4.07098	0.315237	1.24422	0.406405	0.835093	1
CCNA_01118	2.69503	3.7897	2.49397	7.55409	4.77583	2.12877	6.32255	1.0943	3.82651	2.23957	1223264..1223593	4.26173	0.512288	1.42631	0.343706	0.803495	1
CCNA_01119	1.55619	2.73535	3.45622	1.0066	13.0991	1.84382	6.25855	3.31737	2.20953	3.87957	1223722..1224102	4.37068	0.268669	1.2047	0.661357	0.926276	1
CCNA_01120	8.98343	1.57904	11.2229	10.169	11.9396	5.32193	9.03222	6.83937	6.37751	8.39839	complement(1224190..1224321)	8.77878	0.250459	1.18959	0.635211	0.922486	1
CCNA_01121	10.5667	5.77835	7.17079	5.94892	7.97549	6.02801	7.08269	8.93859	7.77931	8.53698	1224493..1226007	7.67311	-0.145849	-1.10638	0.60491	0.914153	1
CCNA_01122	18.1423	18.0479	20.8968	19.4754	18.6401	20.0092	20.3754	14.3413	18.9083	19.968	1226141..1227676	19.0405	-0.0199463	-1.01392	0.940631	0.998993	1
CCNA_01124	9.37065	12.9772	14.6628	10.2859	14.8444	13.626	11.1345	10.377	10.281	14.1582	complement(1229340..1230383)	12.4282	0.005911	1.00411	0.984942	0.998993	1
CCNA_01125	0	0	0.685843	0.399495	1.64169	1.82941	1.24193	0.752331	0.438454	0.384926	complement(1230748..1231227)	0.929411	-0.7859	-1.72417	0.367378	0.812531	1
CCNA_01128	1.95679	4.81529	0.543242	4.43005	4.3345	4.05731	2.95112	5.95906	3.4729	4.87827	1233054..1233356	4.26373	-0.546278	-1.46031	0.30241	0.787346	1
CCNA_01133	69.7866	41.2156	54.2475	34.3069	46.0045	47.296	52.7645	49.6454	49.5428	64.3718	complement(1237868..1238398)	52.7241	-0.187413	-1.13872	0.521586	0.881341	1
CCNA_01134	61.5821	41.2839	34.5903	51.8765	42.5095	39.4517	46.0774	46.2302	36.6014	31.2404	complement(1238520..1238933)	46.3685	0.121704	1.08802	0.67994	0.93414	1
CCNA_01135	1.86449	0	3.1057	1.20602	4.13005	6.62731	6.56114	1.13559	1.98545	2.32408	complement(1238972..1239289)	3.72672	-0.849154	-1.80144	0.210505	0.733576	1
CCNA_01136	0.66544	6.31616	6.46586	8.60865	3.83246	7.29302	4.34885	6.89004	10.1568	10.3684	complement(1239400..1240290)	7.81141	-0.623913	-1.54105	0.121983	0.676136	1
CCNA_01137	32.3713	38.3326	32.1637	42.9802	34.7209	27.252	51.3902	26.6343	32.2541	28.3164	complement(1240347..1240868)	36.1137	0.0851274	1.06078	0.785668	0.964828	1
CCNA_01138	10.9798	0	0.435456	0.507296	0.694897	0	0.788527	0.955341	0.556767	2.44398	1240937..1241314	2.52348	1.09834	2.14108	0.25705	0.771265	1
CCNA_01139	8.77658	5.94218	6.49746	10.9336	8.20847	9.91735	7.84377	6.73138	7.61526	8.4076	1241418..1243241	8.10307	-0.0911084	-1.06519	0.733739	0.948628	1
CCNA_01140	50.8838	86.4584	54.458	83.9536	56.3566	109.983	114.554	81.0721	71.3306	104.792	complement(1243292..1244899)	96.3464	-0.595711	-1.51122	0.119141	0.676136	1
CCNA_01142	174.019	52.873	58.3182	58.6931	140.972	61.1185	65.6114	42.017	38.3854	53.0665	1246920..1247396	96.9751	0.798425	1.7392	0.0253881	0.423308	1
CCNA_01143	20.8684	10.3569	16.6988	16.2776	21.7533	13.8172	10.4908	15.327	14.3791	14.1538	complement(1247757..1248239)	17.191	0.207934	1.15503	0.504435	0.881341	1
CCNA_01144	3.77167	14.8502	6.28253	11.7104	3.34187	17.8752	9.10117	8.72934	12.3169	15.0444	complement(1248269..1248661)	12.6134	-0.685614	-1.60839	0.0841345	0.612743	1
CCNA_01145	4.80236	31.6871	34.2537	32.0194	9.49216	32.3892	17.6424	31.2745	32.126	40.982	complement(1248684..1250288)	30.8828	-0.497403	-1.41167	0.2568	0.771265	1
CCNA_01147	2.15995	1.13898	2.39858	0.698571	0	0.319898	0	1.97333	1.15004	3.02893	1250554..1251102	1.29444	-0.12254	-1.08865	0.87153	0.991045	1
CCNA_01148	0	2.35518	3.71983	7.58364	0	5.95335	10.1038	2.04022	2.37806	3.1316	1251192..1251368	4.72141	-0.58291	-1.49787	0.429072	0.842734	1
CCNA_01149	7.0825	5.21676	6.42929	5.89017	9.06449	6.19378	5.53853	5.34078	6.70401	6.23589	complement(1251371..1254007)	6.73664	0.0739521	1.0526	0.805717	0.972684	1
CCNA_01151	0.602547	1.9064	3.51285	3.70264	2.93636	2.32023	3.63492	4.95438	4.70536	4.13091	1254720..1255703	3.94916	-0.652482	-1.57187	0.107734	0.65905	1
CCNA_01152	0.721298	0.507137	0.800984	1.63297	0	1.49558	0.362607	0.658976	0.512063	0.224774	1255714..1256535	0.732479	0.113278	1.08168	0.874047	0.991607	1
CCNA_01153	6.47985	8.94913	8.86617	6.88591	4.92123	6.16945	6.04968	13.9542	9.03606	5.33668	1256537..1257817	8.10922	-0.250476	-1.1896	0.475282	0.864783	1
CCNA_01154	9.02249	16.0101	17.1759	21.9549	11.0398	25.1982	20.3029	20.1494	17.0806	18.7442	1257902..1258591	20.2951	-0.467189	-1.38241	0.141052	0.699217	1
CCNA_01155	70.6274	31.471	27.602	36.1425	46.5538	33.8198	31.2895	27.5701	32.7092	30.2273	1258877..1261810	42.4794	0.345114	1.27025	0.353298	0.806898	1
CCNA_01156	3.3945	2.91701	3.35068	5.8552	2.33931	2.90472	1.51686	2.29719	2.67758	5.4066	1261886..1262671	3.57134	0.181554	1.1341	0.664322	0.926901	1
CCNA_01157	19.9612	16.9526	16.2408	19.5593	16.1105	13.4645	19.4735	13.0003	13.0484	14.4116	1262857..1264356	17.7649	0.235508	1.17732	0.351999	0.806898	1
CCNA_01158	3.71147	2.06585	2.06075	2.0006	3.97363	3.66455	2.17678	2.73147	1.64678	2.21679	1264793..1266709	2.76246	0.0086	1.00598	0.980429	0.998993	1
CCNA_01159	32.3563	7.99302	8.73995	9.899	23.0515	10.2318	11.8698	7.45673	6.98423	9.81051	1266958..1268313	16.4079	0.711946	1.63801	0.0504567	0.530038	1
CCNA_01161	12.7649	12.6886	10.6313	16.9407	20.8655	15.385	18.3662	9.51724	11.0932	9.46455	1268520..1269866	14.7782	0.150383	1.10986	0.628106	0.920775	1
CCNA_01162	106.152	116.701	128.881	155.886	138.86	151.994	131.049	126.642	150.81	146.432	1269938..1272241	141.386	-0.197224	-1.14649	0.61768	0.920213	1
CCNA_01163	51.2816	8.62869	7.96463	8.40229	14.0515	7.5065	6.40996	5.84877	6.02521	10.0329	1272589..1280028	18.0657	1.19478	2.2891	0.008433	0.284697	1
CCNA_01164	2.64297	6.81357	6.84824	6.0785	3.77289	5.3931	3.10021	4.82923	6.4628	5.12472	1280183..1282201	5.23123	0.0247217	1.01728	0.940589	0.998993	1
CCNA_01165	4.49724	4.87114	4.72413	5.97523	4.41554	5.90453	2.93297	4.81196	4.22814	4.4695	1282180..1284618	4.89666	0.039088	1.02746	0.889386	0.995494	1
CCNA_01166	8.1729	11.4926	9.28208	11.7746	12.5081	6.16224	8.96431	13.3496	15.5602	15.2813	complement(1284624..1285421)	11.8635	-0.237421	-1.17888	0.488457	0.875818	1
CCNA_01167	7.64055	7.87892	5.09079	8.89598	3.83626	8.75101	7.42597	6.98039	7.05143	4.60324	complement(1285421..1286584)	6.96241	-0.132018	-1.09583	0.65923	0.925741	1
CCNA_01168	0.988178	0.347389	0.548674	1.75778	0	1.31718	3.4774	0.300932	1.22767	1.84765	complement(1286584..1287783)	1.63417	-1.15224	-2.22258	0.0621757	0.575336	1
CCNA_01169	0	0.256376	0.404926	0.471729	1.29235	0.648058	0.366621	0.666271	0.517732	0.909051	complement(1287879..1288691)	0.621547	-0.476055	-1.39093	0.519387	0.881341	1
CCNA_01170	3.02503	4.0962	3.29702	3.62354	3.47448	4.57976	7.20939	3.61665	3.02245	2.86294	complement(1288710..1291355)	4.25824	-0.311338	-1.24086	0.324312	0.79382	1
CCNA_01172	7.73662	11.3736	10.3487	14.3307	6.5434	9.1666	8.83936	10.0668	10.9848	12.9313	1292202..1293044	10.3978	-0.0930547	-1.06663	0.766487	0.957635	1
CCNA_01173	351.252	934.16	971.652	805.964	343.86	990.944	743.352	851.912	1002.55	1008.37	complement(1293181..1293510)	919.424	-0.477409	-1.39224	0.271966	0.779053	1
CCNA_01174	3.40751	3.70258	1.37599	2.60486	1.92131	2.01866	0.622912	1.32071	2.63897	2.12373	complement(1293570..1294526)	2.60245	0.406987	1.32591	0.36344	0.810842	1
CCNA_01175	3.52921	0.902309	1.78141	1.24518	1.42138	2.09076	0.645158	1.17246	1.59438	1.19977	1294712..1295635	1.7759	0.1925	1.14274	0.703086	0.940749	1
CCNA_01176	15.6461	31.265	21.4897	28.231	12.4039	34.1491	28.1504	17.5544	21.6304	15.9103	1295632..1295991	23.4789	-0.137637	-1.1001	0.674129	0.928775	1
CCNA_01178	7.60137	3.28889	3.57125	2.26932	7.25324	3.81038	2.35158	2.49293	1.66042	2.18656	1297640..1298146	4.79681	0.745676	1.67676	0.119669	0.676136	1
CCNA_01180	10.4807	18.3743	13.4523	20.1619	27.4972	14.1112	25.3176	12.8497	14.1078	11.4523	complement(1299008..1301185)	17.9933	0.153059	1.11192	0.667441	0.927415	1
CCNA_01181	47.4325	15.8806	11.287	21.1847	31.5205	23.082	14.1935	15.8205	12.8279	20.4121	complement(1301278..1301802)	25.4611	0.428912	1.34622	0.202807	0.731855	1
CCNA_01182	15.9706	2.80718	5.81927	7.74779	13.2662	7.39157	10.0358	7.29533	7.08613	5.59893	1301993..1302586	9.1222	0.162664	1.11935	0.668558	0.927415	1
CCNA_01183	10.0834	14.9894	11.1974	12.8584	9.44492	10.7525	8.97955	8.94901	11.8625	10.953	1302605..1303633	11.7147	0.132278	1.09602	0.631977	0.922486	1
CCNA_01184	815.744	585.665	409.112	453.012	423.094	500.547	570.121	370.41	316.864	520.813	1303641..1304087	537.325	0.155442	1.11376	0.697708	0.938641	1
CCNA_01185	8.44596	2.96914	1.87581	1.09264	1.4967	0	2.54755	0.514414	0	3.15837	complement(1304093..1304443)	3.17605	1.21735	2.3252	0.126143	0.684145	1
CCNA_01186	101.668	26.0542	14.2444	37.4911	52.1974	28.1448	25.7939	21.9912	28.3309	27.2409	1304705..1305016	46.3311	0.676654	1.59843	0.0661352	0.586216	1
CCNA_01187	269.064	56.2619	42.6415	41.3391	188.438	46.1331	71.276	45.1399	52.2332	47.53	1305189..1305740	119.549	1.06482	2.0919	0.0150496	0.370347	1
CCNA_01188	2.88753	4.06039	2.13769	1.24518	1.42138	4.37159	0.967738	3.12657	5.23867	3.19939	1305737..1306660	3.38079	-0.622661	-1.53971	0.153912	0.715952	1
CCNA_01189	31.4745	14.8009	15.6602	15.0048	31.238	17.6169	14.2816	11.8257	16.3956	14.5213	1306766..1309666	21.6357	0.443577	1.35997	0.190962	0.727631	1
CCNA_01190	2.90641	4.76808	4.62608	7.39458	3.43361	6.77242	6.42881	5.19256	4.12663	3.86436	1309772..1311301	5.27696	-0.220815	-1.16539	0.491715	0.87703	1
CCNA_01191	20.627	11.2986	8.65627	13.9629	22.1018	10.7989	15.4337	12.5632	10.557	14.0517	complement(1311323..1312558)	15.3293	0.170185	1.1252	0.588832	0.905981	1
CCNA_01192	0.320837	3.15808	3.74096	7.05602	2.55848	5.13186	3.54837	3.32198	3.41653	7.19862	complement(1312555..1313478)	4.52347	-0.4458	-1.36207	0.301076	0.787346	1
CCNA_01193	1.94396	6.03659	5.57669	5.55364	3.01426	6.62188	4.23478	4.93332	6.09523	5.85593	complement(1313460..1315289)	5.54823	-0.356271	-1.28011	0.313465	0.790776	1
CCNA_01194	3.50332	10.5321	8.31731	9.61133	3.9604	7.37133	9.71681	10.0801	10.3771	12.423	complement(1315500..1317953)	9.99369	-0.523738	-1.43768	0.113485	0.669925	1
CCNA_01195	1.15576	3.25042	4.17121	3.36417	2.81616	4.96402	2.61459	4.3996	6.15374	7.02321	complement(1318104..1319129)	5.03103	-0.79157	-1.73096	0.0290518	0.445543	1
CCNA_01196	0.449172	1.05269	0.99759	0.387389	2.52058	0.709591	0.301074	1.0943	1.16921	1.77299	1319269..1321248	1.08148	0.00222	1.00154	0.996586	0.998993	1
CCNA_01197	0	0	0	5.60695	1.53609	0	0	2.11181	4.92299	1.08049	complement(1321300..1321470)	1.62306	-0.256854	-1.19487	0.815234	0.976574	1
CCNA_01198	2.29809	1.15412	1.82284	1.48649	2.90887	1.94489	1.65041	1.59964	0.233065	2.25073	1321668..1322570	1.93408	0.179148	1.13221	0.723762	0.946576	1
CCNA_01199	33.7343	20.8433	12.8655	20.2778	33.2113	14.5344	19.5283	16.3956	15.482	17.627	1322567..1323436	24.1864	0.42798	1.34535	0.162843	0.718816	1
CCNA_01200	4.59923	9.51624	8.46359	11.6449	6.1709	11.2879	12.6835	11.365	10.9147	10.7288	complement(1323479..1325734)	11.396	-0.541916	-1.4559	0.0697519	0.591154	1
CCNA_01201	2.25869	1.19105	0.627056	0.730506	0	0.334521	0	0.687846	0	0.351932	complement(1325802..1326326)	0.96146	1.35517	2.55827	0.153077	0.715468	1
CCNA_01202	5.38117	6.793	6.38309	4.9838	4.3345	6.52068	3.44297	6.70394	5.73029	6.86007	complement(1326323..1328746)	5.85159	-0.147187	-1.10741	0.624887	0.920775	1
CCNA_01203	2.54146	3.67885	4.9804	3.38453	2.78169	2.47981	3.3068	4.00636	4.7759	4.00649	complement(1328834..1330816)	3.71507	-0.134253	-1.09752	0.687864	0.935624	1
CCNA_01204	9.69415	9.01452	5.38256	7.48422	4.71034	4.63143	6.28825	8.57086	3.77404	5.26228	complement(1330891..1331838)	7.25716	0.247833	1.18742	0.465688	0.85582	1
CCNA_01205	0.901074	2.9565	3.66895	5.05137	2.66131	3.55874	1.81193	0.914688	3.19845	3.93116	1331972..1332958	3.04784	0.160406	1.1176	0.709518	0.943056	1
CCNA_01206	12.4526	11.8621	9.59065	16.1097	7.47438	14.2784	9.69311	9.2971	9.12555	8.51219	1332960..1333697	11.4979	0.103061	1.07405	0.725498	0.946643	1
CCNA_01207	44.8944	18.5157	14.7613	15.412	43.5563	19.0185	14.8779	13.5954	15.8467	15.7878	1333694..1334875	27.4279	0.688862	1.61201	0.0345314	0.477189	1
CCNA_01208	0.978394	1.03185	1.3581	0.316432	0.866901	2.02866	1.47556	1.19181	2.08374	0.304892	1334872..1335477	1.41693	-0.641423	-1.55987	0.335492	0.794743	1
CCNA_01209	4.11741	1.26652	1.28596	1.83102	2.05212	0.914707	1.29368	0.470207	0.365378	1.1227	1335487..1336638	2.1106	1.19431	2.28835	0.0213338	0.401606	1
CCNA_01210	32.2909	27.9005	14.4729	29.6948	39.6419	26.5049	40.2894	15.4021	24.0287	20.8527	1336864..1337625	28.8002	0.108309	1.07796	0.738263	0.949874	1
CCNA_01211	1.01525	8.32782	9.0193	8.31826	1.49926	12.43	7.14535	8.03861	7.44771	6.74939	complement(1337787..1338662)	8.36221	-0.579502	-1.49433	0.182944	0.727631	1
CCNA_01212	4.36338	5.59431	3.84785	4.8147	4.54841	4.86577	3.61289	3.75189	4.19094	6.07883	complement(1338566..1339720)	4.63373	-0.05317	-1.03754	0.86327	0.989912	1
CCNA_01213	3.90805	2.15891	2.01491	1.98619	4.45205	1.1576	0.280662	1.8702	3.36891	1.39182	complement(1339720..1340781)	2.90402	0.67571	1.59738	0.15162	0.711919	1
CCNA_01214	3.15634	3.07273	3.37024	5.18264	3.8723	4.45892	4.14994	4.14059	5.51569	4.53967	complement(1340778..1341998)	4.56096	-0.340864	-1.26651	0.296617	0.784068	1
CCNA_01215	4.061	7.614	7.51609	3.50242	20.39	9.22225	4.76357	2.06118	2.40249	2.95286	complement(1341995..1342432)	8.6167	0.95955	1.9447	0.0580337	0.564447	1
CCNA_01216	4.84401	6.13039	3.94472	4.5955	6.00881	5.73934	6.81844	3.54038	6.64846	6.03806	complement(1342538..1343455)	5.75693	-0.232169	-1.1746	0.48656	0.875709	1
CCNA_01217	12.615	10.7173	11.2362	11.2199	13.0404	14.9467	10.3054	10.4046	10.2617	13.5953	1343532..1344659	11.9027	-0.120799	-1.08734	0.669708	0.927415	1
CCNA_01218	2.98543	0.419805	1.82339	0	2.11618	0.176862	0	0.363665	1.05971	0.930335	1344578..1345570	1.46896	1.34046	2.53232	0.0762708	0.604379	1
CCNA_01219	25.8808	21.2687	13.2503	18.2626	17.571	12.3454	17.5729	13.1018	15.0327	12.988	1345567..1346448	19.2467	0.354602	1.27863	0.198038	0.729152	1
CCNA_01220	174.456	44.603	31.4302	47.5054	91.8808	43.3639	56.9141	37.8952	38.6273	25.2436	complement(1346517..1347731)	77.9751	0.822915	1.76898	0.0460303	0.526705	1
CCNA_01221	411.173	141.351	119.195	135.186	288.837	155.437	195.283	145.97	133.855	79.9938	complement(1347735..1347995)	219.148	0.512854	1.42687	0.171691	0.719546	1
CCNA_01222	37.2897	37.1422	23.1202	33.5677	58.6467	36.8184	43.7409	31.2288	30.0024	20.5294	complement(1348063..1349016)	37.9533	0.147908	1.10796	0.65617	0.925741	1
CCNA_01223	4.31142	4.12259	4.97924	2.11949	2.29207	3.37149	0.866967	4.51661	3.42805	2.25716	complement(1349006..1350724)	3.56496	0.206053	1.15353	0.584396	0.90397	1
CCNA_01224	3.11588	2.34722	2.47151	2.15943	1.5776	3.03254	3.58034	2.03333	2.05402	1.1097	complement(1350729..1352060)	2.36199	-0.0381014	-1.02676	0.916742	0.998993	1
CCNA_01225	10.2497	8.68472	14.1546	9.51989	11.6432	11.3657	9.7769	11.365	12.6872	10.3193	complement(1352057..1353184)	11.1028	-0.0942692	-1.06752	0.755627	0.953285	1
CCNA_01226	13.1133	1.64639	2.08028	4.54402	3.73466	1.66468	2.35437	2.28195	2.32734	1.75132	complement(1353186..1353818)	5.02372	1.08969	2.12828	0.0348937	0.477189	1
CCNA_01227	0.277578	2.34195	1.84946	3.05232	0.491893	1.47998	2.79085	3.71939	2.56175	3.11401	1353981..1355048	2.7332	-0.762558	-1.6965	0.110683	0.661992	1
CCNA_01228	5.64673	2.31593	3.65783	1.52189	3.3355	1.67261	3.31181	2.57942	2.67248	2.93277	1355045..1355674	3.29558	0.223823	1.16782	0.627845	0.920775	1
CCNA_01229	9.64076	2.00269	2.91977	3.40147	8.15386	2.59606	3.96536	3.06938	4.19983	3.82366	complement(1355671..1357023)	5.22371	0.43438	1.35133	0.246468	0.767425	1
CCNA_01230	3.58035	3.52424	4.27409	3.70546	5.393	2.54527	2.15988	1.6355	3.43138	3.23561	1357095..1358750	4.09543	0.576696	1.49143	0.0684991	0.590107	1
CCNA_01231	1.16599	1.63959	2.26591	2.07408	0.25828	1.03613	0.586162	1.42033	2.48328	2.72514	1358738..1359754	1.65021	-0.184508	-1.13643	0.727176	0.94683	1
CCNA_01232	6.79372	3.90813	7.88719	6.39193	8.7557	9.51295	3.10483	8.65181	3.94609	9.23823	complement(1359759..1360238)	6.89078	-0.154541	-1.11307	0.686414	0.935624	1
CCNA_01233	5.87036	4.81529	5.79458	4.85196	6.35727	5.60296	3.60693	4.56861	5.09359	5.48806	complement(1360253..1361161)	5.53789	0.0759882	1.05408	0.813202	0.976177	1
CCNA_01234	10.0447	19.0873	18.5404	24.2331	19.4838	19.7818	22.655	19.3457	18.1163	16.0738	1361248..1362339	19.1945	-0.11807	-1.08528	0.702956	0.940749	1
CCNA_01235	36.5298	798.83	513.05	769.454	99.1759	807.092	598.481	862.863	671.604	310.276	1362403..1363035	650.063	-0.606084	-1.52212	0.293888	0.782733	1
CCNA_01236	0	2.67222	9.848	4.09739	1.12253	1.50106	1.27377	6.9446	8.99393	9.4751	complement(1363099..1363332)	5.63769	-0.630474	-1.54807	0.349038	0.804638	1
CCNA_01237	3.87521	9.53617	8.60666	1.25332	13.7344	8.03507	7.7925	8.26089	8.25325	20.5294	complement(1363329..1363481)	10.5742	-0.582414	-1.49735	0.2885	0.781233	1
CCNA_01238	0	0.285917	0.677376	1.31521	0.720634	1.20455	0	0.990724	0.577388	0.506899	complement(1363636..1364364)	0.655913	-0.20386	-1.15178	0.784649	0.964827	1
CCNA_01239	28.2337	11.8229	18.3276	18.1284	19.498	19.6777	9.60148	16.0582	14.0011	20.5725	complement(1364477..1365904)	19.2021	0.160303	1.11752	0.583422	0.90397	1
CCNA_01240	8.52546	4.08693	1.9365	4.51195	2.06016	1.37744	3.50663	3.54038	1.92576	1.69066	complement(1365901..1366665)	4.2242	0.681787	1.60413	0.139698	0.699217	1
CCNA_01241	6.61542	2.90702	2.98442	5.08145	14.6539	3.67414	1.24713	5.03653	4.40289	3.09229	complement(1366756..1367472)	6.44844	0.733965	1.6632	0.105872	0.65479	1
CCNA_01242	29.1624	15.2799	13.4075	19.4641	25.3454	16.7261	21.1035	15.1598	15.1646	17.8282	complement(1367607..1369202)	20.5319	0.158145	1.11585	0.57266	0.9019	1
CCNA_01243	3.95751	3.96293	4.92742	5.11975	3.93156	5.89675	3.73785	4.60164	5.1082	5.53098	1369302..1371773	4.97508	-0.249647	-1.18892	0.385584	0.827699	1
CCNA_01244	79.1995	3.57606	6.85843	7.04992	69.5305	3.01315	7.30547	4.86803	2.06331	2.26427	complement(1371913..1372320)	33.2429	2.9437	7.6938	1.806e-06	0.001845	0.007379
CCNA_01245	2.99448	2.63173	1.87048	2.17907	1.32662	0.886989	1.50537	1.36787	1.32865	0.933154	complement(1372630..1373421)	2.20048	0.806884	1.74943	0.0911651	0.632274	1
CCNA_01246	2.27541	3.19963	1.26339	3.15391	0.576033	2.31084	0.980471	0.989909	1.15383	1.82333	complement(1373427..1374338)	2.09368	0.428625	1.34595	0.395895	0.8325	1
CCNA_01247	2.8882	2.32076	1.94728	2.66886	3.83861	2.81096	2.48905	3.26691	1.75748	2.44295	complement(1374356..1375792)	2.73274	-0.0378926	-1.02661	0.911242	0.998993	1
CCNA_01248	5.12734	4.26043	4.65856	3.61807	4.13005	6.62731	5.62383	5.11017	3.64	2.61459	1375993..1376628	4.72318	-0.182529	-1.13487	0.626951	0.920775	1
CCNA_01249	0.367352	1.03313	1.01984	0	0.325491	0.870502	0.369347	1.34245	3.39028	1.60267	1376633..1377439	1.51505	-1.43003	-2.69452	0.0472902	0.526734	1
CCNA_01250	0.284777	1.20134	1.89743	1.65785	1.26163	2.19319	4.00854	1.04069	1.61735	1.4199	1377382..1378422	2.05593	-0.588308	-1.50348	0.243042	0.763108	1
CCNA_01251	0.781168	5.49231	8.67469	7.07407	6.57542	9.02415	3.92705	9.03987	10.2595	10.2241	1378419..1379177	8.49493	-0.601559	-1.51736	0.119785	0.676136	1
CCNA_01252	21.0341	4.66494	8.07335	8.67476	8.00521	5.26871	6.95481	6.62051	6.31374	7.91848	complement(1379181..1381280)	10.0905	0.484339	1.39894	0.154556	0.715952	1
CCNA_01255	13.8345	9.72689	5.48674	3.83516	8.7557	2.34165	3.97418	3.61119	9.82137	3.69529	complement(1382977..1383126)	8.32779	0.67365	1.5951	0.255043	0.771265	1
CCNA_01256	10.1199	4.39468	5.78422	4.62067	10.2853	6.52418	10.1748	2.3567	4.43737	5.93621	complement(1383564..1384559)	7.04095	0.195711	1.14529	0.600879	0.911599	1
CCNA_01257	1.23909	3.70258	3.61196	2.20411	2.47026	1.83515	2.18019	1.13203	1.09957	3.08906	complement(1384556..1385512)	2.6456	0.500692	1.41489	0.255266	0.771265	1
CCNA_01258	2.2357	5.65882	12.1652	6.65223	1.98093	10.8606	2.24784	9.25946	8.25325	12.2619	complement(1385509..1386171)	8.57661	-0.595886	-1.5114	0.185843	0.727631	1
CCNA_01259	146.312	4.03941	5.52928	3.96398	21.3802	4.53808	9.62736	4.66562	4.35055	5.49042	1386326..1387099	36.2449	2.46884	5.53599	9.883e-05	0.0329237	0.403723
CCNA_01260	48.6183	22.5108	25.4585	26.0791	36.7739	24.5873	23.4476	22.3894	20.204	18.2301	1387138..1387887	31.8881	0.443481	1.35988	0.144183	0.701621	1
CCNA_01261	8.23482	8.40457	6.63719	4.46747	7.06105	8.34056	8.54662	4.69196	7.16613	5.13235	1388006..1389121	6.96102	-0.0203627	-1.01421	0.948337	0.998993	1
CCNA_01263	83.7119	22.1267	18.0329	18.4022	50.7496	25.2809	31.2618	15.5642	18.4989	14.3575	1392280..1394634	38.6046	0.768656	1.70368	0.0633886	0.580501	1
CCNA_01264	2.99448	8.00047	5.98554	14.7208	4.24519	10.2891	9.03222	5.4715	5.95235	10.4513	complement(1394767..1395261)	8.23929	-0.218431	-1.16347	0.577735	0.90397	1
CCNA_01265	0	0	0	0	0	0	0	0	0	0	complement(1395376..1395498)	0	NaN	NaN	NaN	NaN	NaN
CCNA_01266	1.6608	2.91923	3.68857	4.83423	4.41464	3.4436	3.33964	0.505769	2.35807	0.517548	complement(1395597..1395953)	3.50349	0.821812	1.76762	0.159797	0.718816	1
CCNA_01267	8.83736	7.34318	8.92153	11.1729	8.18622	9.5189	8.48147	8.0738	5.13312	8.26183	complement(1395950..1396687)	8.89224	0.111131	1.08007	0.727405	0.94683	1
CCNA_01268	28.0666	6.57778	2.59728	6.05153	6.73515	7.96715	8.23054	1.0684	3.32084	4.37313	complement(1396765..1397271)	10.0057	0.876748	1.83623	0.0836571	0.612743	1
CCNA_01269	0	2.06779	3.9191	3.04377	1.56352	1.04538	0	0.358253	2.50545	3.66596	1397552..1398055	2.11884	0.458124	1.37375	0.499813	0.880819	1
CCNA_01270	0	1.98508	0.783821	0	0	1.67261	4.25805	0.859807	1.00218	0	1398112..1398321	1.55853	-1.04759	-2.06707	0.34066	0.801129	1
CCNA_01271	7.21703	0	0.924732	2.15458	2.95136	0.657767	0.558171	1.35251	0.394116	1.384	1398470..1399003	2.64954	1.32361	2.50292	0.0790334	0.605204	1
CCNA_01272	8.23482	3.85988	3.04819	1.77553	4.25624	2.43922	0.689961	0.835924	0	1.71078	complement(1399011..1399442)	4.23493	1.61861	3.07079	0.007231	0.274866	1
CCNA_01273	0.641674	0.902309	3.9191	4.1506	0	1.90069	0.645158	2.34493	1.36661	1.99962	complement(1399447..1399908)	1.92274	0.209617	1.15638	0.757393	0.954365	1
CCNA_01274	4.47403	6.97513	6.26439	7.42369	3.96419	7.26004	6.6497	5.44996	7.04289	5.33441	complement(1400085..1401608)	6.3474	-0.146596	-1.10695	0.65232	0.925522	1
CCNA_01275	2.65283	1.39888	1.47295	0.857977	2.05671	2.16092	1.33362	1.00984	1.17706	2.06672	1401717..1402610	1.68787	-0.0575897	-1.04073	0.905593	0.998993	1
CCNA_01276	4.94089	8.68472	2.74337	7.45725	5.83713	5.36628	0.827953	6.5202	4.67684	7.69852	1402610..1402969	5.93267	0.0810951	1.05782	0.864277	0.989912	1
CCNA_01277	56.678	21.6285	15.4424	32.8455	73.9287	20.7204	23.0909	18.3511	13.3126	19.829	1402986..1404392	40.1046	0.973433	1.96351	0.0121992	0.346057	1
CCNA_01278	317.066	38.362	29.2851	39.6064	211.641	34.8374	54.8583	38.032	38.7346	38.5398	complement(1404393..1404881)	127.192	1.49517	2.81898	0.002262	0.13199	1
CCNA_01279	33.3179	8.25215	9.67012	8.81645	55.6876	4.48592	3.42601	2.7672	6.18204	4.48343	complement(1404999..1405781)	23.1488	2.33015	5.02857	6.915e-07	0.001412	0.002825
CCNA_01282	4.25939	0.798595	0	2.38779	2.0128	2.52333	1.99851	1.0377	0.806352	1.23884	1408625..1409668	1.89171	0.15661	1.11467	0.79135	0.965975	1
CCNA_01283	2.97196	4.00498	3.98786	4.96616	4.8277	3.96144	7.71926	6.03373	4.74717	4.63069	1409575..1410771	5.41846	-0.398	-1.31768	0.212732	0.737699	1
CCNA_01284	2.189	3.07813	3.12536	4.45007	3.04787	4.44617	1.88648	3.61881	3.99604	6.82148	1410657..1411604	4.15379	-0.464459	-1.3798	0.217818	0.741695	1
CCNA_01285	2.99448	4.21077	3.49156	3.09912	3.71454	1.41918	1.2043	2.1886	1.70067	2.4262	complement(1411601..1412590)	3.50209	0.864289	1.82044	0.0274522	0.442342	1
CCNA_01286	35.2109	17.5691	19.5505	31.5923	69.4417	36.336	35.4021	34.5899	25.8033	48.1379	1412679..1412939	36.0538	-0.155933	-1.11414	0.667224	0.927415	1
CCNA_01287	9.25484	8.60601	4.30983	10.4279	5.29045	5.12899	7.50411	5.6368	8.68961	7.62875	complement(1412941..1413933)	7.57781	0.050591	1.03569	0.876847	0.992477	1
CCNA_01288	6.32823	12.3212	11.0816	12.2801	12.2925	12.2562	14.6829	9.0428	10.8858	11.8322	1414050..1415267	11.74	-0.138481	-1.10075	0.639661	0.922711	1
CCNA_01289	53.3302	11.0282	9.14457	26.3794	54.8968	21.3722	24.4443	11.9418	13.9192	15.6414	complement(1415258..1415635)	30.9558	0.715082	1.64158	0.0750697	0.603701	1
CCNA_01290	12.0509	3.57745	5.65031	4.67702	13.9996	5.71134	6.19282	4.7301	4.75289	3.33811	1415745..1416851	7.99107	0.586755	1.50186	0.1122	0.667893	1
CCNA_01291	0.586456	2.47399	3.74466	3.9831	0.779439	2.95312	2.06374	5.00066	2.28985	3.83784	1416848..1417858	3.22904	-0.501089	-1.41528	0.267759	0.779053	1
CCNA_01292	3.4795	13.6998	6.56864	10.3531	5.54939	12.3679	9.7955	5.51003	4.94033	3.46976	1417855..1418280	7.9301	0.11996	1.08671	0.774353	0.961177	1
CCNA_01293	78.917	543.278	980.755	436.782	169.642	519.96	207.678	632.376	739.526	798.936	complement(1418341..1418772)	579.695	-0.416122	-1.33434	0.44551	0.850132	1
CCNA_01294	1.19779	7.15832	7.98072	11.6217	5.30648	6.74111	7.22577	8.7544	5.52718	8.58502	1418730..1419224	7.3667	-0.161214	-1.11823	0.690549	0.93593	1
CCNA_01295	14.4026	13.783	10.6625	13.4567	8.86204	16.1166	11.2628	9.01579	12.7808	9.22576	complement(1419254..1419994)	12.2334	-0.007688	-1.00534	0.979543	0.998993	1
CCNA_01297	5.66697	3.73536	2.16323	2.29101	4.07972	1.46878	0.712218	1.9415	1.7601	3.31119	complement(1422154..1422990)	3.58726	0.751136	1.68312	0.0854542	0.614968	1
CCNA_01298	142.875	63.7025	100.337	65.5293	50.7257	67.9786	28.2797	75.3468	85.8796	138.224	1423488..1424678	84.6339	0.003391	1.00235	0.993699	0.998993	1
CCNA_01299	4.25531	10.6377	5.25047	6.42251	3.35146	7.84285	3.80304	7.19934	7.72015	5.00956	1424774..1425400	6.31499	-0.14181	-1.10329	0.696981	0.938111	1
CCNA_01301	12.4332	6.55623	6.47191	6.86943	10.2131	8.97684	8.59422	4.41736	6.06825	4.92383	1426458..1428746	8.50876	0.283493	1.21714	0.36024	0.809098	1
CCNA_01302	110.686	45.5324	45.126	60.0808	105.846	62.821	71.8568	45.7292	46.5242	53.5479	1428800..1429948	73.4542	0.296446	1.22812	0.414875	0.840597	1
CCNA_01303	56.1144	78.4106	89.7474	96.1072	87.8697	100.147	91.548	71.7939	85.937	70.8264	1430061..1430900	84.0505	-0.0955951	-1.06851	0.779966	0.963752	1
CCNA_01304	7.37446	5.18491	4.9135	5.72411	0	0.87375	0	2.69492	3.14116	2.75768	1431129..1431329	4.6394	1.11542	2.16658	0.115887	0.672834	1
CCNA_01333	3.77167	37.1255	68.689	44.4019	1.33675	35.7504	15.1686	65.2403	65.333	72.4014	complement(1446332..1446724)	50.7787	-0.74323	-1.67392	0.190586	0.727631	1
CCNA_01334	6.42137	2.2574	3.16924	4.1536	7.27007	4.01547	3.5868	3.47648	2.02607	2.66808	complement(1446891..1447721)	4.65434	0.418646	1.33667	0.259175	0.771693	1
CCNA_01335	0.968802	1.36231	1.43444	1.04443	0.858402	1.14787	0.649375	0.983439	2.75108	1.40888	complement(1447721..1448638)	1.38813	-0.32359	-1.25144	0.531845	0.881341	1
CCNA_01336	18.0764	25.9271	18.6014	35.3894	18.1521	33.1258	43.3767	21.4323	21.5591	19.8284	1448810..1450039	27.8644	-0.318396	-1.24694	0.302037	0.787346	1
CCNA_01337	3.65315	10.1456	7.40355	9.21571	3.72239	10.0635	10.8353	9.12254	7.91	8.5381	1450109..1451731	9.29389	-0.479208	-1.39398	0.145305	0.704647	1
CCNA_01338	11.7021	26.0542	19.1314	30.2775	17.281	26.9598	39.8725	26.1336	22.615	21.88	1451802..1452257	27.4922	-0.42632	-1.3438	0.17459	0.719777	1
CCNA_01339	0	0	0	0	1.59194	0	0	0	0	0	1452254..1452583	0.318389	2.11228	4.32375	0.315619	0.790776	1
CCNA_01340	21.5646	32.9894	28.4205	38.934	35.9047	40.8525	50.9876	30.4541	31.2911	29.6864	1453071..1454321	36.6543	-0.267826	-1.20399	0.434318	0.846869	1
CCNA_01341	15.4599	8.96014	7.53992	12.0271	13.1428	8.16855	8.61212	9.54331	9.19549	10.9374	1454414..1455832	11.426	0.177372	1.13082	0.52245	0.881341	1
CCNA_01342	12.7507	4.80261	2.52845	5.44934	17.5517	5.12573	9.15709	3.32829	3.39448	5.96015	1455951..1457252	8.61657	0.585745	1.50081	0.15296	0.715468	1
CCNA_01343	4.01105	6.92214	4.45418	4.48142	5.81559	4.53641	4.76608	6.66271	5.43618	3.40894	1457249..1458061	5.13688	-0.0211824	-1.01479	0.951124	0.998993	1
CCNA_01344	2.76027	0.776288	2.14565	2.85673	0.489145	3.27046	0.555053	3.69861	1.17574	2.06441	1458048..1458584	2.15286	-0.385865	-1.30664	0.493596	0.87703	1
CCNA_01345	9.4653	8.51835	7.3577	9.30625	11.4059	8.29895	6.47136	6.45679	9.67623	9.67477	1458745..1459527	9.2107	0.0704365	1.05003	0.819316	0.977035	1
CCNA_01346	7.83577	3.9789	0.966827	1.6895	3.08571	1.28946	2.62611	0.530277	0.618085	0.271314	1459714..1460394	3.51134	1.63815	3.11266	0.008316	0.28309	1
CCNA_01347	24.5003	33.0163	20.632	33.5444	38.3514	29.9963	47.6244	23.6269	18.5528	16.0333	1460358..1461083	30.0089	0.086534	1.06182	0.791515	0.965975	1
CCNA_01348	393.694	276.802	259.161	316.876	367.46	389.548	443.924	254.832	325.762	243.732	1461471..1462034	331.56	-0.115352	-1.08324	0.763362	0.956251	1
CCNA_01349	66.3594	21.2998	14.8182	15.8632	42.1807	17.947	21.0312	11.8616	16.386	14.3856	1462307..1462717	32.1043	0.858357	1.81297	0.0267442	0.438756	1
CCNA_01350	34.5461	15.2512	9.81369	17.1491	22.779	12.8505	15.3474	14.1903	7.98486	15.0215	1462732..1463100	19.9078	0.470599	1.38568	0.173003	0.719777	1
CCNA_01351	9.35312	12.2944	15.8054	14.7304	19.0968	19.2728	11.8571	14.6132	15.0121	16.9811	complement(1463228..1463956)	15.5473	-0.193281	-1.14336	0.526807	0.881341	1
CCNA_01352	12.3522	9.06787	11.5988	10.5749	14.0027	12.9135	9.86239	10.5105	12.2509	12.2271	complement(1463957..1465588)	11.5529	-0.103558	-1.07442	0.726721	0.94683	1
CCNA_01353	3.36214	13.875	10.8761	13.2377	2.84949	13.0765	10.5821	13.5331	16.6042	9.93064	complement(1465853..1467880)	12.7453	-0.578571	-1.49337	0.126278	0.684145	1
CCNA_01361	6.93458	1.21891	2.88776	0.560695	0.768044	1.54056	0	0	0.615374	2.16099	1477574..1477915	2.474	1.22948	2.34483	0.141897	0.699217	1
CCNA_01362	2.65877	2.80404	7.87335	3.72623	5.49685	2.36265	1.78214	5.39789	6.29172	4.1427	1477912..1478580	4.51185	0.113784	1.08206	0.791807	0.965975	1
CCNA_01363	4.36282	4.90792	3.51248	4.37417	4.63878	3.35998	5.26381	3.45441	4.80073	1.90339	1478577..1479935	4.35923	0.176641	1.13025	0.570881	0.9019	1
CCNA_01364	10.4019	20.5183	20.856	33.2679	11.7767	32.8653	35.4422	27.8055	30.5636	21.79	1480166..1481191	29.6933	-0.669448	-1.59046	0.0426271	0.510045	1
CCNA_01366	0	3.70548	7.31566	5.11354	2.33485	6.2444	0	0.802487	0.935369	3.2847	complement(1482020..1482244)	3.69391	0.660677	1.58082	0.383646	0.82658	1
CCNA_01367	5.98896	6.31616	8.68273	12.6978	11.4974	5.12482	10.3703	8.30857	12.2826	7.6726	1482331..1483221	9.0366	-0.0113348	-1.00789	0.971787	0.998993	1
CCNA_01368	12.6877	9.09215	8.12851	8.52257	9.07998	8.81733	6.37831	8.17347	10.0466	10.4928	1483373..1484587	9.50219	-0.0166272	-1.01159	0.954588	0.998993	1
CCNA_01369	6.76122	7.86196	6.0643	5.38267	7.37322	8.31902	6.53647	7.6025	7.38449	4.86222	1484714..1485853	6.94094	-0.141406	-1.10298	0.632838	0.922486	1
CCNA_01371	132.397	14.8399	10.1212	9.9292	40.8032	15.3458	9.64606	4.09034	10.2164	11.9589	complement(1486421..1486729)	41.618	1.86621	3.64574	0.0004116	0.0462612	1
CCNA_01372	8.27538	16.4282	14.5953	19.2073	13.3708	18.7447	14.1935	13.6383	14.5143	12.1356	complement(1486831..1487439)	14.6453	-0.0634831	-1.04499	0.84329	0.987031	1
CCNA_01373	0.367352	2.58282	2.65159	1.90094	1.30196	1.95863	1.10804	1.34245	0.521581	1.83162	1487512..1488318	1.76093	0.375536	1.29732	0.476161	0.865266	1
CCNA_01374	4.75676	1.94193	3.40792	4.2679	3.26299	3.3634	5.86253	2.24297	3.59478	4.78169	1488246..1490177	3.96907	-0.224567	-1.16843	0.496098	0.878033	1
CCNA_01375	5.41467	9.99338	12.0257	10.5073	4.79764	14.8358	8.16612	10.7181	11.0514	5.48388	1490238..1490675	10.0511	-0.259451	-1.19702	0.48727	0.875743	1
CCNA_01376	65.1777	32.2259	18.6783	32.3676	64.8294	34.3774	30.8633	22.0257	24.1803	22.0145	1490853..1491557	42.6558	0.575972	1.49068	0.0672995	0.586216	1
CCNA_01377	38.3171	9.9254	5.59872	16.9582	26.8032	16.7261	40.5528	14.7395	27.2021	15.0828	complement(1492093..1492239)	22.8607	-0.350384	-1.2749	0.427764	0.841937	1
CCNA_01378	4.13896	3.63758	4.0217	4.01587	2.75048	2.45199	5.2018	2.5209	2.93833	3.22451	1492535..1493107	3.71292	0.206259	1.15369	0.625715	0.920775	1
CCNA_01381	11.3308	6.20474	4.23453	5.35597	3.76485	5.55077	4.49121	4.7114	4.64075	6.5187	1495472..1498192	6.17818	0.137245	1.0998	0.651806	0.925522	1
CCNA_01382	10.3217	8.92266	6.76448	10.6167	11.5443	8.82129	6.46484	9.17226	8.76908	8.64766	1498487..1500238	9.63398	0.0818326	1.05836	0.774639	0.961239	1
CCNA_01383	5.71673	3.44518	5.4414	2.64129	6.5125	3.38668	5.74778	1.49223	2.3191	8.65288	1500243..1500605	4.75142	0.0766383	1.05456	0.882196	0.99387	1
CCNA_01384	4.78151	3.08168	4.64603	4.51043	2.47137	4.24896	2.40374	5.70316	2.97017	6.58099	complement(1500699..1502186)	4.3814	-0.264022	-1.20082	0.457635	0.852778	1
CCNA_01385	142.962	23.6338	27.4337	33.7934	114.111	19.1939	29.3177	18.4999	19.8383	14.8922	1502307..1503038	68.3868	1.62773	3.09027	4.068e-05	0.0207698	0.166158
CCNA_01386	28.1677	70.4518	78.4553	79.7497	26.1853	78.2374	72.4266	70.8738	91.7885	105.045	complement(1503106..1503747)	83.6743	-0.60874	-1.52493	0.109637	0.661366	1
CCNA_01387	2.85051	3.34028	2.76975	3.534	5.26184	4.6439	4.06016	2.45954	6.23954	3.40512	1503930..1505177	4.16165	-0.300266	-1.23137	0.405279	0.834458	1
CCNA_01388	6.66187	5.85487	3.39068	4.12961	5.90272	6.24879	3.06994	5.91721	2.95587	2.07601	1505184..1506251	5.18795	0.227145	1.17052	0.548524	0.889528	1
CCNA_01389	199.39	37	43.829	59.0024	174.596	51.9597	90.536	45.585	44.4162	38.2648	1506300..1507313	102.763	0.813493	1.75746	0.0667843	0.586216	1
CCNA_01390	7.53072	6.45704	4.18135	5.2276	6.02158	6.09351	4.61684	6.71225	5.08542	4.92248	1507389..1509002	5.88366	-0.0320955	-1.0225	0.916773	0.998993	1
CCNA_01391	85.9523	223.253	274.033	231.242	152.073	235.787	174.765	355.45	273.809	138.531	1509067..1510149	235.668	-0.352657	-1.27691	0.428069	0.841937	1
CCNA_01392	10.1352	11.1343	10.9031	15.1603	6.73515	8.25582	6.36887	7.33041	6.74545	9.08031	1510305..1510772	10.8136	0.464686	1.38002	0.147485	0.70938	1
CCNA_01393	2.39224	3.62268	3.47392	4.04703	1.46744	3.05243	2.22021	3.69861	5.09489	3.2113	complement(1510803..1512413)	3.45549	-0.254371	-1.19282	0.459633	0.854477	1
CCNA_01394	0.721298	1.77498	1.40172	3.49923	3.51506	1.06827	1.81304	0.439317	2.56032	0.449549	complement(1512465..1513286)	2.18246	0.765974	1.70052	0.178384	0.725163	1
CCNA_01396	3.42523	7.58596	8.65327	6.42516	5.76632	7.30497	6.54327	6.88442	8.38914	6.61779	1515188..1516918	7.14792	-0.198061	-1.14716	0.534747	0.881341	1
CCNA_01397	1.35832	1.19378	0.754192	1.09827	0.300883	0.804691	0	0.206826	1.9286	1.05822	1516960..1517832	0.941088	0.103682	1.07451	0.879145	0.992477	1
CCNA_01398	12.9901	15.657	23.1834	16.2049	27.9525	13.7421	15.8594	13.8457	20.7494	10.4093	1517840..1518478	19.1976	0.30971	1.23946	0.342416	0.802968	1
CCNA_01399	30.5542	38.206	22.5483	40.403	43.6928	45.9394	70.3841	31.8011	26.3587	26.9976	complement(1518556..1520088)	40.2962	-0.263025	-1.19999	0.467119	0.85582	1
CCNA_01405	20.8515	11.4734	7.55056	6.45057	28.9179	9.13029	11.8496	7.17821	7.07963	3.39018	complement(1524077..1524403)	15.0488	0.864209	1.82034	0.0500966	0.530038	1
CCNA_01406	76.7047	37.654	23.0213	38.2175	49.2891	33.1597	37.8658	30.0932	34.0952	23.2571	complement(1524621..1525478)	44.9773	0.39422	1.31423	0.2043	0.732075	1
CCNA_01407	24.8215	5.59774	8.32113	6.36163	18.6733	4.71659	5.65049	5.70488	6.64954	6.12963	1525535..1526167	12.7551	1.00767	2.01067	0.007544	0.274866	1
CCNA_01408	11.2293	13.685	17.4578	15.9798	9.28635	11.9743	15.0537	26.4456	19.664	25.6617	complement(1526164..1526559)	19.7599	-0.604302	-1.52024	0.0780499	0.605204	1
CCNA_01409	3.53974	3.52574	2.9481	4.19768	3.39773	3.495	3.26238	3.05424	1.8847	2.94152	complement(1526556..1527560)	3.5218	0.191399	1.14187	0.561761	0.89851	1
CCNA_01410	2.7669	3.47389	6.14515	3.57948	4.37785	4.6833	4.5703	4.81492	4.20916	3.94164	complement(1527619..1529118)	4.44387	-0.153226	-1.11205	0.640708	0.922711	1
CCNA_01412	5.43239	11.2765	4.73986	10.3743	6.647	11.034	8.84306	6.77492	6.24395	8.38373	1529975..1531120	8.25592	-0.158262	-1.11594	0.643938	0.923733	1
CCNA_01413	11.364	5.90561	7.13277	6.39193	4.37785	8.19578	5.46449	6.31958	5.61221	9.85411	1531128..1531727	7.08923	-0.143056	-1.10424	0.668666	0.927415	1
CCNA_01414	20.8334	18.6066	16.5697	17.6643	16.4637	15.8445	22.0788	13.2033	14.3903	12.9844	1531736..1532788	18.0275	0.163879	1.1203	0.575863	0.903033	1
CCNA_01415	20.8037	17.7612	9.48835	18.7432	6.58323	15.4056	10.0848	12.8971	9.23061	18.7543	1532847..1533644	14.676	0.0443432	1.03121	0.89395	0.996667	1
CCNA_01416	1.65247	6.50628	5.8721	5.77197	7.90648	9.00635	10.9655	9.05817	7.50798	6.59138	1533716..1534612	8.62588	-0.66016	-1.58026	0.0668601	0.586216	1
CCNA_01417	12.0804	17.6667	12.0735	13.4402	11.1319	17.8916	13.3606	17.07	14.9224	14.6065	1534788..1536014	15.5702	-0.301535	-1.23245	0.313194	0.790776	1
CCNA_01418	216.205	127.765	166.812	172.453	232.114	154.015	146.698	109.467	130.418	176.498	complement(1536112..1536558)	183.07	0.274423	1.20951	0.425698	0.841024	1
CCNA_01419	10.1352	18.9485	21.6144	16.6875	6.53106	12.8272	4.40031	17.9577	16.5161	28.4253	1536723..1538009	16.0253	-0.174295	-1.12841	0.657218	0.925741	1
CCNA_01420	26.8934	7.47546	5.90346	4.04552	8.86653	4.07566	5.0306	6.47576	8.43608	4.67758	1538042..1538515	10.6369	0.72273	1.6503	0.102928	0.652481	1
CCNA_01421	3.18767	3.13771	0.707967	1.23715	2.82442	1.51074	1.28199	1.5532	0	1.19203	1538581..1539045	2.21898	0.757309	1.69034	0.256604	0.771265	1
CCNA_01423	28.8335	10.0379	8.70418	9.77802	22.0753	18.0765	27.3014	12.617	13.1164	7.1533	1539451..1540509	15.8858	-0.0787995	-1.05614	0.829501	0.982372	1
CCNA_01424	7.78564	3.36862	4.98795	9.29735	6.89843	6.03152	6.02148	2.91813	4.67684	6.71871	1540672..1541166	6.4676	0.213109	1.15918	0.574857	0.902508	1
CCNA_01425	21.2049	8.5751	7.8492	11.6543	32.2966	11.659	11.1478	6.75304	8.65839	10.3655	1541409..1543547	16.316	0.660911	1.58108	0.0604684	0.570539	1
CCNA_01426	37.3905	67.2244	83.3392	93.2876	52.0609	86.0715	79.4835	70.2718	103.902	81.8956	complement(1543638..1544192)	84.3248	-0.389716	-1.31014	0.273427	0.779053	1
CCNA_01429	5.58293	1.96265	3.71983	1.80563	6.43074	5.29187	3.92927	3.40037	7.92685	5.56729	1545062..1545592	5.22313	-0.560897	-1.47519	0.203991	0.732075	1
CCNA_01430	10.9798	10.0357	7.62048	10.6532	6.32356	9.75688	3.31181	9.36234	12.0818	9.58038	1545577..1546116	9.12254	-0.0805434	-1.05742	0.82201	0.978637	1
CCNA_01431	4.9272	8.08329	4.25565	3.36417	4.12318	3.72978	4.67874	2.16738	2.33194	5.45934	1546292..1547374	4.9507	0.384671	1.30556	0.302086	0.787346	1
CCNA_01432	26.3716	8.52488	6.39559	12.3525	20.9492	10.0562	18.8956	7.0156	10.114	7.17899	1547371..1548348	14.9188	0.3853	1.30613	0.289639	0.781488	1
CCNA_01434	12.5262	3.91424	4.63668	3.60108	3.08299	0.824525	1.39936	5.93388	3.45823	3.90348	1548878..1549303	5.55224	0.641323	1.55976	0.233713	0.75798	1
CCNA_01435	54.1145	25.6406	21.5551	44.1347	52.1172	34.846	27.2042	19.3457	30.0654	26.3949	complement(1549509..1549760)	39.5124	0.403298	1.32253	0.196187	0.728473	1
CCNA_01437	0	3.30847	3.26592	5.3266	8.33876	4.87844	2.36558	1.43301	1.6703	4.39916	complement(1549757..1550008)	4.04795	0.362528	1.28568	0.569798	0.9019	1
CCNA_01438	26.1408	25.6502	18.9803	28.615	51.4143	30.9724	37.2579	19.2457	25.0837	26.1392	1550159..1551190	30.1601	0.0539504	1.0381	0.856973	0.987462	1
CCNA_01439	20.1021	107.267	98.3384	111.961	41.0599	127.988	93.6101	101.686	102.901	77.9414	complement(1551231..1552631)	100.825	-0.456584	-1.37229	0.308679	0.790606	1
CCNA_01440	268.934	350.467	294.478	303.819	229.976	364.586	296.806	279.22	286.383	309.89	1552866..1553339	307.377	-0.149013	-1.10881	0.689103	0.935624	1
CCNA_01441	10.0069	6.15626	5.5562	15.373	7.75821	9.63337	10.0612	3.04742	6.21606	7.01637	1553343..1553816	8.9701	0.262345	1.19943	0.482795	0.872765	1
CCNA_01442	24.2383	12.0166	9.48965	13.4673	22.0269	9.2046	12.8098	10.0311	9.92726	11.0394	1553908..1554861	16.2477	0.506726	1.42082	0.106663	0.65719	1
CCNA_01443	26.2265	13.1711	8.06109	10.2998	14.9386	8.87829	10.3592	7.41635	5.65211	6.12963	complement(1554869..1555501)	14.5394	0.804616	1.74668	0.0199714	0.396036	1
CCNA_01444	9.98456	16.1048	13.8595	16.6209	9.49726	23.3991	21.8491	15.5608	17.9291	14.8251	complement(1555589..1557607)	18.7126	-0.54831	-1.46237	0.0714257	0.597897	1
CCNA_01445	3.36115	7.08957	2.23949	0.86965	3.57375	2.78768	9.46232	3.27546	4.29506	1.67587	1557697..1558137	4.29928	-0.337345	-1.26343	0.546778	0.888094	1
CCNA_01446	9.46903	5.29192	5.662	3.29804	3.65717	4.17124	4.39405	2.51393	2.93021	3.93438	1558246..1559466	5.47563	0.523278	1.43722	0.114488	0.670993	1
CCNA_01447	4.82598	2.26207	1.65878	1.63514	1.83259	1.63371	1.15528	1.81959	1.63146	2.14842	1559503..1560792	2.44291	0.345976	1.27101	0.39495	0.8325	1
CCNA_01449	6.66868	3.8362	5.21746	2.35286	5.10301	3.41191	4.57152	2.95394	5.595	1.70029	1561881..1562858	4.63564	0.274987	1.20998	0.455779	0.852415	1
CCNA_01452	6.4098	9.38889	15.7188	19.694	11.3587	17.4042	18.2597	9.43464	17.0642	17.9771	1565802..1566356	16.028	-0.375089	-1.29692	0.248214	0.767425	1
CCNA_01453	235.419	20.4346	20.9787	40.7329	64.3801	24.6792	15.585	16.5218	21.3209	18.1142	1566524..1566829	76.389	1.82024	3.5314	0.0001301	0.0329237	0.531371
CCNA_01457	9.41122	0	0	0	2.08469	0.69692	0	0	1.6703	0.733193	1567625..1567876	2.29918	1.45903	2.74923	0.212114	0.736809	1
CCNA_01458	5.75638	2.69817	0.532694	3.10288	1.70014	3.41017	5.78764	1.16867	0.681094	4.1856	1567879..1568187	3.04663	-0.246138	-1.18603	0.708525	0.94247	1
CCNA_01459	0	8.07881	3.82796	0	2.03621	2.72285	0	3.49921	1.63146	0.716142	1568188..1568445	2.7886	0.616093	1.53272	0.463337	0.855182	1
CCNA_01460	2.70734	0.95175	1.50322	3.50242	0	6.41548	1.36102	0.824473	0.960995	1.68735	1568518..1568736	2.24986	-0.455635	-1.37139	0.577929	0.90397	1
CCNA_01461	20.3448	10.2173	5.91708	5.63993	29.1857	5.73934	5.84438	4.72051	4.8144	8.45328	1568764..1569069	14.261	1.13631	2.19819	0.0132321	0.354442	1
CCNA_01462	5.29381	1.41791	0.979776	3.09813	6.70079	1.64274	2.02764	1.38183	1.07377	2.5138	complement(1569294..1570469)	3.49808	0.882277	1.84328	0.0571472	0.560336	1
CCNA_01463	4.2732	3.19222	2.52094	7.60121	4.73281	4.58837	4.29641	5.36798	4.92965	6.15882	complement(1570667..1571776)	5.06824	-0.281652	-1.21559	0.397551	0.8325	1
CCNA_01464	13.9836	34.7389	24.8456	27.7385	2.47803	22.6433	7.49845	25.5509	21.84	37.7663	complement(1572066..1572383)	23.0598	-0.209798	-1.15653	0.638755	0.922711	1
CCNA_01465	2.04322	1.56717	1.75328	3.96492	1.97497	3.52128	3.17486	2.37578	1.97799	1.85228	1572606..1574201	2.58044	-0.238015	-1.17937	0.508009	0.881341	1
CCNA_01466	7.77219	3.90325	8.01434	5.02736	4.91893	4.60437	1.11634	6.08627	3.94116	8.30402	complement(1574323..1574589)	5.92721	0.145189	1.10588	0.773768	0.961008	1
CCNA_01478	1.19058	2.51125	1.98316	1.79693	2.10981	1.64574	0.399014	1.9337	1.40869	2.22608	complement(1585598..1586344)	1.91834	0.2024	1.15061	0.6775	0.931848	1
CCNA_01479	3.44713	3.83744	3.11022	6.78213	5.47231	6.46677	7.79817	2.88685	5.60813	5.63962	1586381..1588444	5.67991	-0.376338	-1.29804	0.241774	0.761485	1
CCNA_01480	42.1429	7.15212	6.45499	12.6899	32.1901	9.03946	9.49711	7.96586	10.8324	6.79281	1588441..1588848	20.126	1.04477	2.06303	0.0124779	0.346057	1
CCNA_01481	6.7916	8.11768	5.46789	9.11563	7.67252	8.24808	8.19418	6.92869	7.47331	6.8784	1588858..1590603	7.54453	-0.0863237	-1.06166	0.76882	0.957984	1
CCNA_01483	6.76834	3.807	6.01287	7.00485	4.79764	6.41548	5.44408	6.59578	10.5709	13.4988	1590869..1591087	8.50501	-0.659875	-1.57995	0.171004	0.719546	1
CCNA_01484	65.6432	34.2426	27.4337	31.9596	94.4364	20.0713	21.2902	32.2428	25.0545	44.4315	1591111..1591530	50.7431	0.718445	1.64541	0.0521748	0.53989	1
CCNA_01485	15.3832	7.51607	9.12044	8.76992	11.32	10.9668	16.5154	9.2106	10.9209	7.80009	complement(1591536..1592672)	11.0828	-0.166866	-1.12262	0.586055	0.904433	1
CCNA_01486	59.232	20.8227	17.4208	30.7268	42.8691	25.3621	33.9043	18.2167	21.025	17.3617	complement(1592713..1593723)	34.2143	0.458373	1.37399	0.165465	0.718816	1
CCNA_01487	27.3832	15.0675	13.4414	12.8352	23.2079	16.9276	20.7487	14.9862	10.4243	8.40963	1593897..1594643	18.387	0.2709	1.20656	0.398395	0.8325	1
CCNA_01490	7.04551	10.9234	6.31928	9.11463	4.64196	8.02668	12.3512	9.02247	10.773	8.21926	1598349..1599989	9.67852	-0.399563	-1.31911	0.194025	0.727631	1
CCNA_01491	5.36221	6.28352	7.93947	8.09314	5.42989	8.16855	11.2961	6.22083	6.88838	9.54855	complement(1599999..1601159)	8.42448	-0.345171	-1.2703	0.259472	0.771693	1
CCNA_01492	1.72758	6.31616	3.83688	2.23494	4.28601	2.86566	2.77914	3.36708	2.94347	4.73755	complement(1601184..1602041)	3.68031	0.0907591	1.06493	0.814228	0.976261	1
CCNA_01493	40.9515	22.3247	17.4653	21.8823	37.5995	22.1507	28.6427	19.8814	23.1736	18.31	complement(1602115..1603113)	28.0447	0.22477	1.16859	0.447616	0.851243	1
CCNA_01494	13.6053	17.789	16.6988	13.7411	14.3813	19.5138	16.0791	19.0445	18.9785	24.546	complement(1603290..1604531)	19.6324	-0.429745	-1.347	0.12688	0.685589	1
CCNA_01495	11.0251	42.347	65.977	46.6188	20.442	41.6078	33.8708	52.1036	58.7021	54.7168	complement(1604575..1606026)	48.2002	-0.411302	-1.32989	0.32464	0.79382	1
CCNA_01496	63.1336	10.1322	12.1928	16.6456	19.4571	9.75688	11.0394	11.4939	12.91	17.7494	1606088..1606951	24.3123	0.800582	1.7418	0.0294614	0.445543	1
CCNA_01497	5.02965	8.32069	8.54224	10.5256	1.83503	7.36148	8.92405	8.46936	9.87178	7.19143	1606954..1607955	8.36362	-0.328987	-1.25613	0.34514	0.803495	1
CCNA_01498	1.21249	2.2733	1.12203	0.784285	3.0439	1.67603	1.42225	0.861565	1.57808	1.00758	1608057..1609523	1.6872	0.279673	1.21392	0.533493	0.881341	1
CCNA_01499	0.985714	1.21283	2.5997	2.0722	2.18347	1.31389	0.991066	2.10127	2.79911	3.07173	1609534..1610736	2.05541	-0.233411	-1.17561	0.594615	0.908717	1
CCNA_01500	4.62005	2.346	5.84303	5.81084	4.32099	4.71371	4.12901	5.31517	4.73758	7.19862	1610768..1611922	5.21882	-0.252856	-1.19156	0.440154	0.847876	1
CCNA_01501	53.6884	150.991	88.1335	180.182	69.6319	182.538	231.566	115.16	112.134	139.18	complement(1611887..1612267)	156.116	-0.573895	-1.48854	0.123994	0.681152	1
CCNA_01502	15.9991	18.5274	21.4244	24.5531	17.5114	20.443	19.2401	19.1068	21.3799	17.4011	1613345..1614289	19.6031	-0.0373901	-1.02626	0.900392	0.996776	1
CCNA_01503	7.11707	6.73607	5.62353	5.66597	5.33588	3.40545	3.30264	2.83427	2.7206	3.58269	complement(1612264..1613346)	6.09571	0.859076	1.81388	0.0082	0.28309	1
CCNA_01505	4.89197	4.81529	1.62973	1.26573	6.06831	6.9554	0	0	0	1.82935	complement(1616437..1616739)	3.7342	0.931494	1.90725	0.250431	0.767425	1
CCNA_01506	12.4022	10.6889	12.2174	13.1979	12.0524	13.2725	13.6763	9.99047	13.0649	14.462	complement(1616805..1617545)	12.8932	-0.144302	-1.1052	0.638439	0.922711	1
CCNA_01507	3.59337	2.21066	4.23976	7.84464	7.95972	3.19316	5.41933	5.4715	5.42089	5.87887	complement(1617542..1618201)	5.16963	-0.0467302	-1.03292	0.903923	0.998437	1
CCNA_01508	4.52601	4.24292	1.67534	1.95173	4.01024	4.91568	5.68823	3.21607	1.60655	6.58194	complement(1618206..1618991)	4.40169	-0.525876	-1.43981	0.197795	0.729152	1
CCNA_01509	8.23482	5.22951	4.2773	6.01391	5.41347	2.67527	3.73914	4.20658	3.96023	6.29127	complement(1619099..1620214)	5.8338	0.362004	1.28521	0.241212	0.761485	1
CCNA_01510	89.5536	11.3987	6.00113	11.9849	58.1433	11.8912	17.0765	11.285	7.67295	8.66084	1620483..1620866	35.4163	1.50245	2.83324	0.002255	0.13199	1
CCNA_01511	7.55086	8.77128	9.84333	14.6526	13.3808	14.3922	9.57235	6.99843	9.08955	7.77525	1620866..1621768	10.8398	0.121682	1.088	0.715127	0.943897	1
CCNA_01512	1.33538	2.5037	1.73005	1.72755	7.88802	2.63699	6.71314	2.7111	3.79204	2.77424	1621899..1622564	3.7255	-0.345152	-1.27028	0.483344	0.872883	1
CCNA_01513	20.1853	18.8522	20.0735	20.0722	20.5545	27.3074	25.7473	20.5515	22.4574	24.4099	1622843..1623826	24.0947	-0.33427	-1.26074	0.213572	0.738106	1
CCNA_01514	15.3848	22.8819	13.4704	23.7305	28.8361	29.0954	25.5823	20.9031	17.6432	14.3829	1623823..1624323	21.5214	-0.11433	-1.08247	0.715258	0.943897	1
CCNA_01515	16.4311	9.76269	10.4081	16.0172	18.4546	11.5163	8.60916	9.30283	11.6647	10.3849	1624314..1625594	14.2147	0.355264	1.27922	0.224713	0.748121	1
CCNA_01516	6.0883	5.26846	2.60035	2.72641	5.80947	2.49702	6.12136	1.42622	3.98973	3.21076	complement(1625780..1626412)	4.4986	0.331892	1.25866	0.453298	0.852037	1
CCNA_01517	0.288098	2.22815	2.07952	2.4226	1.78688	1.36539	0.868989	0.877354	2.45432	1.79557	complement(1626548..1627576)	1.76105	0.253528	1.19212	0.610127	0.916452	1
CCNA_01519	9.11603	8.71677	7.89605	9.9063	5.16942	11.233	8.43229	9.54989	9.31917	8.86324	1628290..1629102	9.47952	-0.281322	-1.21531	0.377966	0.820808	1
CCNA_01520	6.32434	4.44658	3.51152	4.09083	1.40091	0.93666	3.97418	2.40746	2.80611	1.97082	1629134..1629508	3.95484	0.7037	1.62868	0.173095	0.719777	1
CCNA_01521	6.53941	21.4564	44.9832	18.7998	3.54091	17.4332	8.03602	39.3868	47.972	48.6818	complement(1629643..1630458)	32.302	-0.794916	-1.73498	0.111448	0.664618	1
CCNA_01522	12.9485	5.27073	4.16236	4.62864	7.84994	4.64293	4.79642	5.60357	5.08002	5.30933	complement(1630557..1631426)	6.97204	0.298391	1.22977	0.392597	0.8325	1
CCNA_01529	3.21359	42.3645	34.794	31.6998	4.98292	39.0275	31.5026	30.3379	47.3388	42.5609	1637293..1637661	38.1536	-0.723817	-1.65155	0.104511	0.653371	1
CCNA_01531	23.5026	7.51111	6.82136	7.94672	19.4045	9.17674	15.0374	6.83198	4.17124	5.65945	1638743..1639297	13.0373	0.576322	1.49104	0.131166	0.69406	1
CCNA_01533	13.3189	12.6872	21.7084	14.1734	7.99433	15.7807	7.77556	32.1867	20.1308	13.121	1642303..1642992	17.7989	-0.43543	-1.35231	0.229999	0.755232	1
CCNA_01534	19.3178	14.6269	17.3266	34.1223	7.89988	20.6875	16.4346	20.3639	21.0985	20.8381	1643010..1643408	19.8845	-0.167452	-1.12307	0.609936	0.916452	1
CCNA_01535	68.2313	9.51184	10.4509	12.936	21.8892	15.6807	11.8279	12.5389	10.0218	11.7311	1643665..1644168	24.6039	0.835782	1.78482	0.0397355	0.495604	1
CCNA_01536	25.2486	11.6306	13.7773	16.6134	15.0428	12.1209	17.9451	9.27986	13.2888	13.5657	1644321..1645001	16.4625	0.237341	1.17882	0.450732	0.851243	1
CCNA_01537	26.4986	11.2562	6.13044	8.92727	20.5441	12.7548	11.6561	9.75088	5.87871	6.88136	complement(1645354..1645890)	14.6713	0.519835	1.43379	0.163493	0.718816	1
CCNA_01538	12.4486	18.2795	19.1455	17.3159	13.2751	16.5769	13.4023	15.9692	15.0942	23.2758	1646212..1648902	16.8637	-0.12445	-1.09009	0.707602	0.942163	1
CCNA_01539	29.2636	39.659	27.0805	53.2203	47.3484	41.9588	49.8904	34.6137	42.4529	33.3052	complement(1649458..1650156)	40.4442	-0.107021	-1.077	0.717759	0.945097	1
CCNA_01541	2.64395	9.06232	5.13809	6.4133	5.85665	10.3769	8.9718	8.05171	6.56948	5.76745	1650282..1651178	7.94746	-0.480122	-1.39486	0.173701	0.719777	1
CCNA_01542	7.31017	8.99448	9.27745	9.37257	8.67473	9.66665	8.13735	10.4949	8.80384	10.7393	complement(1651185..1653455)	9.5684	-0.199425	-1.14824	0.477948	0.866201	1
CCNA_01543	13.7063	13.5225	6.99652	13.8706	17.0413	10.2153	9.77985	11.9834	9.10258	15.0181	complement(1653545..1654885)	13.0274	0.112728	1.08127	0.721008	0.946576	1
CCNA_01545	25.3315	20.4554	18.382	24.8214	36.0006	20.2071	28.9994	20.0112	19.5858	24.3852	1655039..1656220	24.9982	0.065962	1.04678	0.820563	0.97783	1
CCNA_01546	2.66355	2.3409	2.58809	1.5506	1.41602	2.13021	1.87461	1.86562	2.17454	2.57309	complement(1656352..1658577)	2.12361	-0.0757884	-1.05394	0.821459	0.978612	1
CCNA_01547	5.20094	6.82589	4.71667	7.51332	5.37631	7.39469	8.7153	7.6025	6.27682	6.48297	1659435..1661144	7.29445	-0.341955	-1.26747	0.218625	0.741695	1
CCNA_01548	214.471	65.7037	37.6621	53.1871	330.338	36.4257	51.7624	61.2268	40.7059	24.6353	1661146..1662360	140.272	1.58859	3.00755	0.001448	0.1038	1
CCNA_01549	12.7407	8.6301	10.3523	10.1507	15.6942	11.8739	10.4666	7.66526	11.3612	7.35959	complement(1662374..1664281)	11.5136	0.161238	1.11825	0.587174	0.905134	1
CCNA_01550	87.6366	65.2284	50.5049	56.6868	51.9451	55.6769	34.6373	44.7257	50.6301	39.552	complement(1664281..1665261)	62.4003	0.372204	1.29433	0.251291	0.767425	1
CCNA_01551	51.4394	71.3813	72.906	58.6656	14.3929	53.7296	36.7475	65.9578	62.4647	42.1837	1665480..1665698	53.7571	-0.0263381	-1.01842	0.941503	0.998993	1
CCNA_01553	3.69906	1.48616	0.293409	2.05089	2.80931	0	0.531307	0.965559	0.750296	0.329349	1668534..1669094	2.06777	1.74223	3.34552	0.0247042	0.419699	1
CCNA_01554	3.27347	7.7677	7.04302	11.1164	4.89449	8.48424	5.75968	6.60432	7.69791	8.03324	complement(1669091..1670539)	7.31588	-0.148331	-1.10829	0.649084	0.924535	1
CCNA_01556	6.34863	7.37474	5.05761	7.49891	6.11431	5.55978	6.66063	4.70732	3.72319	5.50509	1672295..1673368	6.47884	0.256565	1.19463	0.416206	0.840597	1
CCNA_01557	15.1872	9.25421	7.7579	8.64482	13.9948	11.9962	9.16178	7.27665	8.05031	7.82473	1673476..1674939	10.9678	0.201354	1.14978	0.493407	0.87703	1
CCNA_01558	4.94089	10.4217	8.42607	10.9576	10.6319	10.0356	8.51609	9.88778	10.2724	11.2178	1674964..1675803	9.98594	-0.189141	-1.14008	0.53277	0.881341	1
CCNA_01559	8.10615	6.78494	8.57304	7.98991	7.52443	6.8603	8.92637	7.0531	4.38454	5.05216	1675960..1676727	7.79569	0.245311	1.18535	0.407801	0.83628	1
CCNA_01560	4.778	9.39095	9.64702	10.3957	4.90704	9.26367	6.87838	10.5822	10.3302	9.20439	1676914..1679643	9.25177	-0.300106	-1.23123	0.310979	0.790776	1
CCNA_01561	23.1604	24.4258	22.2899	34.4565	22.5733	20.1236	40.3627	19.7487	26.3072	19.2463	1679798..1680181	25.3812	-0.0131601	-1.00916	0.96762	0.998993	1
CCNA_01562	31.1825	28.4087	29.2626	35.2266	39.3034	31.4822	33.1181	23.2721	28.3729	39.6902	1680175..1680849	32.6768	-0.003057	-1.00212	0.991065	0.998993	1
CCNA_01563	15.8001	10.7323	11.0032	8.66115	8.30486	9.20161	6.46208	7.82914	7.79474	11.5165	1680856..1681962	10.9003	0.23929	1.18041	0.415787	0.840597	1
CCNA_01566	9.50171	28.0583	35.3473	25.1989	26.0987	45.5946	33.4366	47.4547	48.5672	35.5316	complement(1682996..1683307)	42.117	-0.794641	-1.73465	0.0171969	0.375664	1
CCNA_01567	2.18382	5.75783	5.91113	6.53318	6.53049	5.82178	8.23379	4.65531	7.94547	8.67679	1683567..1684652	7.06663	-0.407288	-1.32619	0.230152	0.755232	1
CCNA_01568	37.5725	23.6683	18.2088	20.9318	37.9093	24.9604	29.6971	15.8734	22.3563	20.5745	1684807..1686171	27.6581	0.202531	1.15072	0.534186	0.881341	1
CCNA_01569	2.46019	1.72974	2.04899	1.85658	0.363307	1.45746	0.824518	0.249736	1.16436	1.53332	1686283..1687005	1.69176	0.619098	1.53591	0.266179	0.779053	1
CCNA_01570	14.6045	7.46786	10.0046	11.1644	18.4861	11.6858	9.34427	7.97096	11.4453	7.92017	1687082..1688644	12.3455	0.258853	1.19653	0.40691	0.83529	1
CCNA_01571	8.59285	2.01385	3.18072	2.7791	0	2.12106	2.15988	2.18067	2.54176	4.01662	complement(1688684..1689097)	3.3133	0.189316	1.14022	0.740374	0.949874	1
CCNA_01572	6.58785	29.3351	26.0925	29.2608	16.7331	29.6609	22.5203	22.4696	20.5781	25.4564	complement(1689094..1689768)	24.1371	-0.194166	-1.14406	0.572029	0.9019	1
CCNA_01573	0	0	2.78987	1.08338	0	1.48834	0	2.04022	0	0	complement(1689765..1690118)	0.774649	0.127141	1.09213	0.907975	0.998993	1
CCNA_01574	42.3505	116.269	121.828	127.578	51.1047	118.277	139.907	111.038	123.698	151.834	1690173..1690907	128.951	-0.534383	-1.44832	0.175184	0.720859	1
CCNA_01575	9.66433	11.5513	13.415	13.4402	4.70967	11.1643	10.2027	7.35776	10.4629	8.58319	complement(1690968..1692194)	10.5561	0.102816	1.07387	0.750444	0.952215	1
CCNA_01576	46.664	12.3838	12.8278	13.1685	28.1723	14.7708	14.2592	7.80195	11.0425	11.4052	complement(1692309..1693604)	22.6433	0.824746	1.77122	0.0183638	0.384698	1
CCNA_01577	10.1352	25.9587	20.2989	29.9695	7.37659	32.38	33.4821	20.5031	14.3903	19.627	complement(1693632..1694450)	24.0765	-0.399336	-1.3189	0.286028	0.781233	1
CCNA_01578	5.71673	4.59357	4.98795	2.11303	5.06528	5.80574	4.92666	2.98445	8.11684	3.05396	1694679..1695041	4.97753	-0.22067	-1.16527	0.644605	0.923935	1
CCNA_01579	10.6087	3.45317	3.70873	3.93936	3.48139	4.30622	3.95047	4.66655	4.32352	3.55081	1695303..1696811	5.03826	0.134126	1.09743	0.698294	0.938641	1
CCNA_01580	44.172	12.1666	13.4008	19.1463	22.1919	14.2981	10.9885	15.2546	11.9615	19.0157	1696883..1697533	22.2155	0.495583	1.40989	0.125511	0.68345	1
CCNA_01581	10.683	8.13704	5.43731	9.21359	7.09921	7.38358	8.05576	6.50665	6.32006	7.21303	1697642..1697974	8.11403	0.0971185	1.06963	0.796078	0.968386	1
CCNA_01582	14.7002	18.9485	19.4983	23.7716	15.9194	24.1906	22.9911	18.4041	22.6112	26.9766	1698089..1698451	23.0347	-0.337362	-1.26344	0.254146	0.770264	1
CCNA_01583	21.9279	29.4329	24.9829	32.9728	23.4663	30.1985	34.0725	27.5782	29.3145	27.3331	complement(1698521..1699561)	29.6994	-0.205772	-1.1533	0.442528	0.849096	1
CCNA_01584	15.5374	30.5003	27.5372	31.9194	17.0709	36.0084	33.743	25.1345	26.2962	27.1918	complement(1699686..1702070)	29.6748	-0.323688	-1.25153	0.360007	0.809098	1
CCNA_01585	68.7738	66.074	71.6281	60.143	35.0733	74.3997	43.2349	56.1105	58.2247	89.8974	complement(1702356..1704437)	64.3734	-0.160078	-1.11735	0.680407	0.93414	1
CCNA_01586	14.2918	6.60326	4.98795	6.3391	3.61806	5.08003	5.74778	5.2228	4.92808	6.10792	1704585..1705310	7.16804	0.27283	1.20818	0.446663	0.850572	1
CCNA_01587	18.2087	8.77463	9.76936	9.52834	5.07577	7.0298	5.34827	6.47971	7.11694	12.2411	1705307..1706755	10.2713	0.319662	1.24804	0.357688	0.808162	1
CCNA_01588	2.40486	13.9878	13.9596	12.8687	4.06791	10.1023	5.71508	9.45407	10.3987	11.3093	1706752..1708107	9.45778	-0.0263802	-1.01845	0.946981	0.998993	1
CCNA_01589	66.2262	163.704	175.894	201.54	99.5701	165.12	140.774	157.057	170.662	142.027	complement(1708112..1709248)	155.128	-0.190075	-1.14082	0.646936	0.924535	1
CCNA_01591	1.88224	10.9179	11.496	17.3495	4.58632	8.92057	11.8279	6.30525	10.6899	5.57226	1711708..1712337	9.24641	0.0734147	1.0522	0.86045	0.988453	1
CCNA_01592	7.60137	12.1465	12.278	14.3036	9.79658	14.7377	8.33743	13.8892	12.755	11.1979	1712453..1712881	12.1834	-0.171695	-1.12638	0.600912	0.911599	1
CCNA_01593	148.227	9.43241	6.99469	18.7313	100.459	17.543	15.6269	11.3597	8.71101	11.0125	complement(1713020..1714831)	56.7687	2.00622	4.01727	0.0002349	0.0355361	0.959476
CCNA_01594	1.36772	4.56774	2.08838	2.43291	1.51483	3.24104	2.06272	2.91561	2.42743	2.34419	complement(1715035..1715901)	2.5982	-0.162092	-1.11891	0.699508	0.939655	1
CCNA_01595	2.39558	1.26323	1.99518	1.54956	0.530648	1.41918	2.40859	2.1886	1.70067	2.23957	complement(1715941..1716435)	1.99132	-0.378081	-1.29961	0.505531	0.881341	1
CCNA_01597	1.20509	1.69458	4.01469	3.89752	5.33884	1.42784	0	0.733982	0.85552	0.751075	complement(1718983..1719228)	3.23014	1.82797	3.55036	0.0227234	0.415619	1
CCNA_01598	7.05841	13.7853	13.0637	16.1066	20.4994	16.9584	18.7275	11.4641	15.3111	9.5315	1719348..1720859	14.3985	-0.0780204	-1.05557	0.803182	0.971572	1
CCNA_01599	0	12.9535	2.78987	23.8343	0	12.8989	0	4.08044	5.94514	7.30707	complement(1720927..1721103)	7.91553	0.316944	1.24569	0.668462	0.927415	1
CCNA_01600	90.6645	53.4268	56.4972	47.2538	95.0701	49.2674	82.6314	41.1175	58.3448	41.6686	complement(1721109..1722017)	68.5825	0.251269	1.19025	0.464099	0.855182	1
CCNA_01601	11.2577	6.15626	14.585	8.09104	14.4081	6.66926	3.77295	10.666	5.32805	7.01637	1722154..1722390	10.8996	0.572905	1.48752	0.198308	0.729152	1
CCNA_01602	37.1147	95.5727	102.007	113.434	69.4701	120.381	99.8209	82.2266	98.8066	103.514	1722517..1723155	100.95	-0.316435	-1.24525	0.384089	0.826809	1
CCNA_01603	88.9606	17.3261	11.3566	20.8814	26.6383	17.0806	18.8303	13.0579	13.6457	19.0447	complement(1723294..1724496)	33.0326	0.875634	1.83481	0.0233893	0.419699	1
CCNA_01604	0.49908	4.91257	6.6506	9.36191	3.09545	8.57422	10.0358	7.90328	4.60598	5.90998	1724760..1725353	7.40585	-0.5886	-1.50379	0.162806	0.718816	1
CCNA_01605	145.482	32.423	30.4819	26.2779	250.997	17.8876	14.9032	27.4183	31.179	43.4539	complement(1725350..1725889)	97.1322	1.73788	3.33545	0.0002716	0.0357862	1
CCNA_01606	3.57711	1.88627	2.48269	1.15691	1.58474	1.32446	1.3487	1.08935	2.8569	2.50812	complement(1725900..1726562)	2.13755	0.116399	1.08403	0.815733	0.976574	1
CCNA_01607	12.764	19.1064	15.7744	16.7788	10.5798	17.5624	19.8709	10.5326	16.9536	18.2198	1726781..1727500	16.6279	-0.17243	-1.12695	0.546965	0.888094	1
CCNA_01608	1.31757	2.47032	2.68241	5.11354	8.95027	5.72403	3.97418	3.47744	2.49432	1.0949	complement(1727463..1728137)	4.10682	0.223331	1.16743	0.650274	0.924597	1
CCNA_01609	5.91088	3.94276	3.78686	6.27428	7.11736	4.39957	6.40013	4.43091	5.70259	3.21165	1728187..1730142	5.40643	0.0853534	1.06095	0.790354	0.965784	1
CCNA_01610	41.2211	13.4985	13.3772	14.1231	16.0104	11.9313	13.2473	11.4641	11.6253	20.1775	1730384..1731958	19.6461	0.403936	1.32311	0.215823	0.741039	1
CCNA_01611	0.674524	3.55688	2.99617	1.96339	0.298829	3.19679	3.73003	0.616244	1.676	1.89179	1732085..1732963	2.22217	-0.168177	-1.12364	0.762909	0.955977	1
CCNA_01614	0	0.807881	2.23298	0.371624	2.03621	0.680712	0	0.349921	2.03932	3.58071	1735447..1735962	1.33013	-0.294776	-1.22669	0.713682	0.943798	1
CCNA_01615	3.67079	23.7443	23.3981	19.8501	6.24478	23.921	18.306	30.6745	28.4572	17.7535	1735967..1737985	23.8224	-0.677066	-1.59888	0.11898	0.676136	1
CCNA_01617	11.8152	33.9837	22.9608	39.9495	21.4134	34.043	24.2986	35.3269	30.1199	29.1205	1739139..1739690	30.5818	-0.293871	-1.22593	0.366498	0.812531	1
CCNA_01618	13.1174	6.4559	12.6244	12.1616	9.29809	8.54806	4.83583	8.78829	14.8997	5.7228	complement(1739738..1740415)	10.7315	0.229585	1.1725	0.514784	0.881341	1
CCNA_01619	38.236	8.0301	8.8229	8.99366	26.3991	5.58937	10.9839	7.25867	5.28789	9.28465	complement(1740418..1741014)	18.0964	1.11181	2.16117	0.007517	0.274866	1
CCNA_01620	2.39558	3.36862	2.99277	3.87389	3.18389	0.354795	4.21504	0.729533	2.55101	1.86631	1741064..1741558	3.16295	0.823202	1.76933	0.134174	0.699217	1
CCNA_01621	55.9967	32.423	25.1476	18.1105	21.8892	27.3193	19.8709	22.0684	20.4612	43.1117	1741687..1742046	30.7134	0.100122	1.07186	0.768874	0.957984	1
CCNA_01623	26.1161	37.7165	16.0683	47.0263	46.9055	60.2139	43.9998	28.3736	24.0523	27.2748	complement(1744514..1744933)	36.7829	-0.148098	-1.10811	0.655865	0.925741	1
CCNA_01624	2.53379	8.90741	3.65783	9.83373	3.59208	5.70402	5.60461	5.55568	4.67684	5.68506	1745014..1745598	5.70497	0.0307301	1.02153	0.93776	0.998993	1
CCNA_01625	12.9927	27.0191	33.8349	32.5515	19.4571	37.835	35.694	34.8859	35.8558	48.3581	complement(1745770..1747389)	38.5258	-0.65855	-1.5785	0.0582181	0.564896	1
CCNA_01626	5.03777	1.63477	1.50616	2.25597	2.06016	1.14787	0.389625	1.18013	0.825325	2.1737	1747568..1748332	2.49897	0.856942	1.81119	0.101394	0.649821	1
CCNA_01628	1.00834	3.54478	4.47897	3.91342	1.78688	4.77888	7.09674	1.84244	1.43169	1.88535	1748742..1749035	3.40702	-0.053007	-1.03742	0.929329	0.998993	1
CCNA_01629	44.8535	16.9999	18.8728	21.9864	39.7422	25.1188	17.616	15.5802	19.1552	26.2077	1749159..1750004	28.491	0.353373	1.27754	0.272491	0.779053	1
CCNA_01630	1.27782	8.38525	7.56792	10.4695	1.5096	12.112	12.4193	7.26389	6.04764	16.1934	1750026..1750721	10.8073	-0.891237	-1.85477	0.0401639	0.495731	1
CCNA_01632	15.4002	24.3623	43.8227	27.809	17.0566	30.0309	18.0644	32.0474	25.0545	30.3942	complement(1751025..1751486)	27.1183	-0.120646	-1.08722	0.721185	0.946576	1
CCNA_01634	7.30695	11.0088	15.2624	11.2534	8.01578	18.1395	10.1453	10.8081	11.6098	16.6982	1752579..1753430	13.4802	-0.384395	-1.30531	0.220255	0.741695	1
CCNA_01635	12.9597	10.2508	7.4206	11.0025	14.7124	7.1977	9.36537	6.90665	6.61275	7.57232	1753433..1754164	11.2692	0.481524	1.39622	0.121986	0.676136	1
CCNA_01636	10.0873	14.1845	14.2095	13.1705	10.4274	13.0584	13.8983	12.1738	16.8419	14.553	1754218..1755804	14.1051	-0.227303	-1.17064	0.423474	0.841024	1
CCNA_01637	11.5721	4.57091	5.70333	5.9714	9.67735	6.70143	5.22918	4.98914	3.78455	6.48297	1755866..1758145	7.49901	0.353683	1.27782	0.236739	0.758112	1
CCNA_01638	5.1223	3.90156	3.31812	3.58942	3.59305	6.19551	4.50636	1.94989	3.18187	2.12832	1758142..1759530	3.90489	0.0513881	1.03626	0.885404	0.994838	1
CCNA_01639	2.93966	6.20053	4.51997	5.41193	3.00539	4.68866	3.63769	5.09588	6.74236	4.93269	1759642..1760952	5.01946	-0.230522	-1.17326	0.49801	0.879538	1
CCNA_01640	0.615687	0	0.683706	1.19475	1.09105	0.182372	0	0.937484	0.437088	2.1105	1760990..1761952	0.733488	-0.170581	-1.12551	0.823527	0.979472	1
CCNA_01641	11.0853	2.89491	3.34129	4.712	12.6284	5.8166	6.68732	4.62973	5.39636	4.73755	1761961..1762896	6.93239	0.22511	1.16887	0.542051	0.887049	1
CCNA_01642	6.56212	8.41332	2.35759	7.74022	7.52443	4.57354	8.53827	3.52655	1.91824	2.88695	1762909..1763676	6.51954	0.554543	1.4687	0.156859	0.715952	1
CCNA_01643	9.17594	9.18099	7.44629	11.1859	10.0065	13.799	11.3548	10.1027	11.5251	9.8981	complement(1763716..1764555)	11.3359	-0.348519	-1.27325	0.233095	0.75798	1
CCNA_01644	52.8791	6.04155	5.32159	8.33729	14.9345	5.09054	5.9812	3.42197	5.86561	5.35549	complement(1764656..1765552)	17.5028	1.60851	3.04938	0.000434	0.0462612	1
CCNA_01645	205.899	42.8487	46.8381	59.6877	210.503	58.9492	91.3922	45.0874	56.2199	55.7942	1765667..1766527	113.155	0.775999	1.71237	0.0752497	0.603701	1
CCNA_01646	13.9243	21.4749	32.4217	25.2772	16.7154	24.4809	22.5805	24.3482	20.7269	27.7147	complement(1766524..1767183)	23.9702	-0.162858	-1.1195	0.59853	0.910951	1
CCNA_01647	8.21343	20.9336	21.2344	19.2588	10.4614	18.2466	16.7741	22.9803	24.599	21.1159	complement(1767180..1768334)	20.7432	-0.421784	-1.33958	0.191307	0.727631	1
CCNA_01648	4.45971	5.28097	3.25816	3.94751	4.7834	4.86685	5.66391	2.28737	4.16584	4.24242	1768405..1769667	4.34595	-0.0200779	-1.01401	0.94963	0.998993	1
CCNA_01649	488.109	132.539	73.9138	166.312	478.496	159.777	263.574	102.355	93.1645	81.9868	1769664..1770605	267.874	0.832481	1.78075	0.088165	0.62405	1
CCNA_01650	4.51738	1.98508	3.76234	8.76607	1.00065	3.01069	1.70322	5.84669	5.21134	10.558	complement(1770655..1771179)	5.26598	-0.49059	-1.40502	0.334349	0.794743	1
CCNA_01651	13.3189	4.98428	4.89036	5.76663	7.42331	5.98139	6.80362	5.03735	5.79522	6.62742	1771304..1774063	7.2767	0.152404	1.11142	0.631838	0.922486	1
CCNA_01652	12.0509	3.8128	3.34558	3.50776	5.33884	1.78479	0.60582	2.20194	2.56656	3.37984	1774090..1774581	5.61119	1.17108	2.2518	0.0212014	0.400962	1
CCNA_01653	3.5546	4.24864	3.3552	2.98903	4.7243	3.57986	3.93129	1.51549	4.54226	5.53851	1774739..1775572	3.82148	-0.0852426	-1.06087	0.810224	0.974279	1
CCNA_01654	2.44426	4.91009	2.52041	5.64658	5.87838	2.89603	2.45753	4.67881	3.47045	5.65828	1775569..1776417	4.27994	0.056102	1.03965	0.886015	0.994838	1
CCNA_01655	19.0034	8.90741	11.2549	6.96556	6.17389	12.759	5.73198	8.48784	9.89332	11.4491	1776509..1776976	10.461	-0.0165263	-1.01152	0.963005	0.998993	1
CCNA_01656	170.051	77.7895	62.6095	81.9578	176.457	100.382	163.66	69.7868	70.7982	67.8226	complement(1777143..1778120)	113.773	0.18186	1.13435	0.660082	0.925772	1
CCNA_01657	15.627	54.9359	59.9714	54.703	29.3214	41.6596	40.2039	44.7899	43.0705	59.583	complement(1778162..1778806)	45.8614	-0.135726	-1.09865	0.682424	0.93453	1
CCNA_01658	2.69258	1.70381	3.13955	2.09	4.05577	1.75464	1.3536	3.11592	2.67612	5.20227	1778893..1779993	2.82051	-0.152549	-1.11153	0.699838	0.939788	1
CCNA_01659	15.4071	10.459	9.29207	9.10678	20.477	7.71108	7.21121	9.06033	11.1264	10.0991	1779993..1781108	12.9484	0.409148	1.3279	0.193952	0.727631	1
CCNA_01660	7.70009	9.32386	9.50085	11.6217	5.68552	11.911	5.59137	10.943	12.4513	15.9969	complement(1781219..1781911)	11.3787	-0.446499	-1.36273	0.194509	0.727631	1
CCNA_01663	11.422	6.93561	4.99668	5.70907	10.1204	5.9464	7.13403	5.48108	7.12584	5.17729	1782651..1784363	7.83676	0.237628	1.17905	0.425061	0.841024	1
CCNA_01664	0.863037	2.62944	3.75367	3.53556	2.93131	3.23809	3.76014	2.62823	3.06344	3.76522	1784375..1786435	3.29102	-0.265408	-1.20198	0.453332	0.852037	1
CCNA_01665	2.4954	4.21077	3.04819	5.81084	0.442207	3.25229	2.00716	0.303972	1.77153	4.35472	1786463..1787056	3.20148	0.416731	1.3349	0.461751	0.854797	1
CCNA_01668	10.8666	19.8167	18.2891	22.4047	13.8406	20.1173	16.7298	14.8915	17.5984	18.8362	1790704..1791576	17.6346	-0.088674	-1.06339	0.766391	0.957635	1
CCNA_01669	8.2924	9.47424	13.4291	13.4096	11.0212	13.7142	14.9379	11.1534	16.9249	15.074	1791576..1792433	14.3609	-0.389984	-1.31038	0.189311	0.727631	1
CCNA_01670	2.03448	2.86085	2.25925	3.94795	4.89289	3.96014	5.84438	2.30125	4.53929	3.44169	1792450..1793469	4.01735	-0.352672	-1.27692	0.33457	0.794743	1
CCNA_01672	18.4904	9.16425	9.42508	7.45071	19.0692	9.51744	9.75258	7.56947	8.60769	9.82388	complement(1794029..1795006)	12.7199	0.385334	1.30616	0.231707	0.756613	1
CCNA_01673	8.75601	11.6529	9.54971	15.373	8.58945	8.52183	14.463	11.0469	9.54609	7.99087	complement(1795018..1795965)	10.7842	0.0272908	1.0191	0.929827	0.998993	1
CCNA_01674	5.84721	4.93333	3.13837	4.91687	4.83549	4.73411	4.89913	3.08649	3.87431	3.76575	complement(1795962..1797482)	4.73425	0.126608	1.09172	0.681719	0.934191	1
CCNA_01675	7.14145	3.97016	2.95085	4.40452	6.76911	4.62427	2.33775	3.03461	5.06986	4.86495	1797735..1799519	5.04722	0.204787	1.15252	0.505849	0.881341	1
CCNA_01676	6.04126	3.08453	2.83522	4.88466	4.01462	4.04761	4.26631	3.76713	4.5441	2.95838	1799591..1803712	4.17206	-0.0135967	-1.00947	0.964652	0.998993	1
CCNA_01677	53.814	31.6417	30.5407	39.4297	95.1523	41.0494	44.5299	28.8605	38.3727	37.9917	1803814..1805058	50.1157	0.314621	1.24368	0.375618	0.819221	1
CCNA_01678	7.37446	4.14793	3.76702	6.29652	5.75001	4.71825	4.4487	4.67119	4.81645	3.86075	1805059..1806063	5.46719	0.15983	1.11716	0.627074	0.920775	1
CCNA_01679	5.69321	4.57467	8.01561	5.12932	3.78333	7.22732	3.27093	4.45826	5.62953	5.95606	1806060..1807517	5.43923	-0.0259948	-1.01818	0.933145	0.998993	1
CCNA_01680	3.5371	4.66294	6.1373	6.00584	4.70105	8.64368	4.44539	6.59762	4.55129	7.57796	1807514..1808854	6.36319	-0.40226	-1.32158	0.19634	0.728473	1
CCNA_01681	1.75416	3.28889	1.29864	0.37822	0.518089	1.73199	0	6.05426	4.15105	3.64427	1808851..1809357	3.11631	-1.19979	-2.29706	0.06929	0.590107	1
CCNA_01682	15.1542	13.0965	15.7766	21.0341	15.6651	17.7681	17.141	18.4598	18.8269	18.1026	complement(1809354..1810292)	18.0597	-0.218505	-1.16353	0.464122	0.855182	1
CCNA_01683	11.4114	10.0717	11.7284	7.53839	10.5413	9.34934	10.4969	9.90785	11.0314	13.3164	1810291..1811511	10.8204	-0.147685	-1.10779	0.634215	0.922486	1
CCNA_01684	15.7439	8.00761	6.88168	9.75039	9.79451	7.14402	6.3991	8.97697	6.89636	7.30707	complement(1811466..1812350)	10.0356	0.302709	1.23346	0.319876	0.79382	1
CCNA_01685	57.494	12.6323	15.4626	18.0136	58.106	20.2233	31.6128	15.8673	26.1478	26.3149	complement(1812515..1812844)	32.3417	0.317589	1.24625	0.414459	0.840597	1
CCNA_01686	19.8171	11.6738	16.2075	19.2277	13.7623	15.0716	9.42386	11.2544	14.4488	10.3481	1813006..1814112	16.1377	0.321697	1.2498	0.26888	0.779053	1
CCNA_01687	1.66781	1.75893	1.62056	1.88791	0	1.23505	0.419217	2.03161	2.66403	1.55919	1814109..1814819	1.58182	-0.241921	-1.18257	0.661432	0.926276	1
CCNA_01688	3.69147	1.59719	4.25696	2.20411	2.516	3.70088	3.42601	1.55655	4.83811	3.71653	1814816..1815859	3.44762	-0.315552	-1.24449	0.41396	0.840597	1
CCNA_01689	11.9472	11.3898	6.4087	9.03776	5.74144	11.0365	10.7905	7.64664	5.75022	12.6205	1815952..1817415	9.56888	-0.182274	-1.13467	0.561153	0.898314	1
CCNA_01690	0	0	0	0	1.32662	0.443494	0	0	0	1.86631	1817419..1817814	0.461961	-0.936573	-1.91398	0.477007	0.865715	1
CCNA_01691	3.24753	0.97856	1.67436	1.35041	1.8498	2.611	1.63258	1.27155	2.79952	2.31317	1817814..1819091	2.12556	-0.384938	-1.3058	0.347829	0.803666	1
CCNA_01692	13.0872	5.6009	5.68684	6.74771	6.55417	6.40471	5.14888	6.0071	5.25135	7.56553	1819124..1820686	7.53536	0.175887	1.12966	0.565464	0.899552	1
CCNA_01693	16.5247	20.913	13.3957	17.9572	28.1119	15.4674	19.605	12.6814	13.3736	10.093	complement(1820814..1821710)	19.3805	0.380549	1.30184	0.20201	0.731855	1
CCNA_01694	5.51541	3.12381	4.25329	4.36038	4.8869	2.72285	3.38883	3.63918	2.82786	2.6736	complement(1821724..1823658)	4.42796	0.450614	1.36662	0.14124	0.699217	1
CCNA_01695	6.00438	10.7329	8.75845	9.34761	9.0172	10.8521	8.79967	10.2893	8.453	9.13357	complement(1823677..1826589)	9.50555	-0.174736	-1.12876	0.550945	0.891332	1
CCNA_01696	6.54071	7.95452	6.28178	7.88985	6.73515	11.5197	7.10944	5.81408	7.6553	8.37335	complement(1826794..1828470)	8.09438	-0.264242	-1.20101	0.39292	0.8325	1
CCNA_01697	4.74325	6.85514	6.29147	5.62489	3.50228	6.55662	5.82879	6.0989	8.60539	7.22635	1828520..1829644	6.86321	-0.373928	-1.29588	0.25102	0.767425	1
CCNA_01698	2.263	2.65182	5.23544	10.2466	3.67606	6.03288	3.03372	3.67551	4.01637	6.81701	1829731..1830516	4.81458	-0.0218901	-1.01529	0.95685	0.998993	1
CCNA_01699	97.9355	29.5694	27.597	37.4765	102.15	37.8079	52.6342	30.0932	31.3182	34.6434	complement(1830513..1831520)	58.9456	0.560539	1.47482	0.148507	0.710609	1
CCNA_01700	87.838	30.879	22	37.981	57.9483	36.3408	50.3972	26.0227	26.4343	24.9923	1831698..1832939	47.3293	0.421963	1.33975	0.264722	0.778167	1
CCNA_01701	11.4136	11.4036	11.1736	11.4627	13.0404	13.8791	9.05967	15.0009	14.0732	15.163	1832940..1833926	13.4352	-0.308784	-1.23866	0.2958	0.784068	1
CCNA_01702	1.5727	2.0272	2.7652	2.20411	0.69674	2.79507	2.6354	0.957875	0.930407	2.28709	1833926..1835056	1.92117	-0.0279156	-1.01954	0.949935	0.998993	1
CCNA_01703	28.0732	41.6472	46.6061	46.8499	33.5801	48.8953	47.7014	35.9067	50.2229	43.0417	1835056..1836111	45.1536	-0.245288	-1.18533	0.453258	0.852037	1
CCNA_01704	7.35008	5.74197	5.4414	4.22607	2.17083	2.41906	0.821111	2.48705	1.15955	0.508993	1836139..1836501	4.98607	1.56836	2.96568	0.005472	0.228098	1
CCNA_01705	4.55543	10.1014	7.58805	7.25325	6.5202	6.85057	8.10337	9.3908	9.20443	9.39111	complement(1836721..1837566)	8.58806	-0.288741	-1.22157	0.369584	0.813882	1
CCNA_01706	28.6231	36.2962	29.9879	38.0209	43.6275	36.6388	44.8808	25.9425	33.7459	35.9972	1837718..1839457	35.441	-0.0627991	-1.04449	0.846067	0.987357	1
CCNA_01707	6.47985	8.73218	11.0934	11.5264	5.26299	9.91682	3.80044	7.23553	13.0338	7.40404	1839457..1840005	8.61897	0.002155	1.0015	0.9954	0.998993	1
CCNA_01708	27.9268	8.30713	7.45481	13.2007	8.0895	13.0445	20.5188	5.23361	6.10023	8.70268	1840110..1840661	12.9958	0.183389	1.13555	0.648315	0.924535	1
CCNA_01709	4.49172	2.52646	2.49397	2.32434	3.97986	2.12877	0.903222	2.1886	4.46426	5.59893	complement(1840745..1841074)	3.16327	-0.146992	-1.10726	0.786983	0.964914	1
CCNA_01710	15.3071	7.08401	5.05641	5.01327	12.1893	6.0837	5.06513	4.83852	6.3275	6.40034	complement(1841077..1842606)	8.93001	0.515717	1.4297	0.117453	0.676136	1
CCNA_01711	7.23057	13.8391	9.81369	9.22412	4.62699	13.4455	11.3086	10.2757	11.4069	8.51219	complement(1842780..1844255)	10.9898	-0.341702	-1.26725	0.269022	0.779053	1
CCNA_01712	4.63208	10.3131	13.7169	8.48928	10.2606	6.8603	9.31448	8.93393	12.0575	12.9913	complement(1844245..1844628)	10.0315	-0.0928525	-1.06648	0.799993	0.970013	1
CCNA_01713	17.9203	33.4789	47.7603	34.1123	25.4051	46.4084	24.7099	39.6046	38.166	45.9518	1844752..1845330	38.9681	-0.3391	-1.26497	0.291023	0.782639	1
CCNA_01714	48.557	80.2588	112.1	97.532	55.8553	88.8212	54.8162	100.138	107.648	157.687	1845426..1845773	101.822	-0.422313	-1.34007	0.214508	0.738841	1
CCNA_01715	9.06189	6.97812	5.03151	8.65282	6.49986	8.43608	7.80952	7.88469	5.82053	6.99254	1845879..1846565	7.38867	-0.130972	-1.09503	0.684794	0.935624	1
CCNA_01716	9.56301	10.0855	7.07967	8.24765	14.1221	5.66528	0	6.79525	10.1835	3.97343	1846602..1846787	9.81958	0.670206	1.5913	0.191236	0.727631	1
CCNA_01717	18.7537	15.7212	26.833	22.8616	23.6468	24.7839	16.6799	27.2377	19.9705	21.5783	1846800..1847210	22.0501	-0.107325	-1.07723	0.73381	0.948628	1
CCNA_01718	2.87261	0.403941	1.27599	1.48649	6.61768	2.38249	2.31057	0.699843	0.815729	1.79035	1847210..1847725	2.53134	0.533057	1.44699	0.399116	0.8325	1
CCNA_01719	0	1.34908	5.85963	3.72345	1.70014	8.52543	1.92921	2.33734	6.81094	4.1856	1847722..1848030	4.7577	-0.841022	-1.79132	0.170152	0.719432	1
CCNA_01721	2.53379	1.42519	7.31566	2.95012	0.44901	6.00423	3.05706	4.32108	2.87806	2.52669	1848549..1849133	3.75742	-0.352464	-1.27674	0.505677	0.881341	1
CCNA_01722	4.3919	2.0586	1.6257	0	1.29714	0.433639	1.47192	1.7833	2.0786	1.36863	1849102..1849506	1.87467	0.218193	1.16328	0.758602	0.954365	1
CCNA_01723	39.0259	13.5935	15.9036	12.9691	28.8684	17.1806	9.35947	11.7756	14.2339	12.9424	1849599..1850426	22.0721	0.634041	1.55191	0.0522272	0.53989	1
CCNA_01724	24.8029	6.08969	5.46488	5.60248	4.88366	4.89787	4.75001	4.55595	6.98732	8.58799	1850579..1851331	9.36872	0.499161	1.41339	0.203435	0.731912	1
CCNA_01726	5.53648	2.24122	4.28506	3.68974	3.27038	4.07503	1.85552	2.86116	3.57314	3.03236	1852884..1854650	3.80458	0.184495	1.13642	0.575019	0.902508	1
CCNA_01727	13.5825	9.82654	9.07171	11.3323	9.5929	9.32928	11.4792	9.1119	10.2015	11.1644	complement(1854729..1856234)	10.6812	-0.0181569	-1.01266	0.94806	0.998993	1
CCNA_01728	5.09774	4.41129	5.00774	5.07296	3.82193	7.89842	4.3369	6.44855	5.84606	5.86554	complement(1856420..1857175)	6.07909	-0.466809	-1.38205	0.153438	0.715518	1
CCNA_01729	34.4985	22.4056	26.4597	32.1487	26.1635	37.0646	42.6225	30.4494	29.8875	27.5142	complement(1857224..1858237)	33.5076	-0.309443	-1.23923	0.264006	0.777551	1
CCNA_01730	12.0317	24.2687	16.5369	23.0926	10.3111	26.0573	30.7384	19.7018	13.8625	20.0377	complement(1858257..1859759)	22.0795	-0.403495	-1.32271	0.194688	0.727631	1
CCNA_01731	9.59396	9.78085	7.45771	9.30863	10.6258	5.9678	3.85842	6.42768	6.81094	7.17532	complement(1859756..1860373)	9.3534	0.497656	1.41192	0.130114	0.691702	1
CCNA_01732	0.214355	1.65782	1.19018	1.94115	1.3295	1.39686	1.50864	1.82779	1.36957	2.27115	complement(1860370..1861752)	1.6748	-0.401754	-1.32111	0.366119	0.812531	1
CCNA_01733	1.89514	1.33245	3.15676	4.55315	4.078	1.60387	0.816612	3.62768	3.84398	3.71216	complement(1861826..1862920)	3.0031	0.0398321	1.02799	0.924821	0.998993	1
CCNA_01734	7.76734	16.9902	18.4489	18.7013	15.6761	21.4736	13.8836	12.6155	16.5425	18.2882	complement(1862960..1863646)	16.5607	-0.130445	-1.09463	0.671132	0.927593	1
CCNA_01735	1.21997	7.29088	7.78982	9.86408	9.18808	12.2864	4.29309	7.80195	12.1252	8.36383	complement(1863704..1864189)	8.97409	-0.387461	-1.30809	0.315213	0.790776	1
CCNA_01736	12.8463	9.72689	4.93807	6.39193	6.12899	2.92706	6.95481	4.51399	8.06756	3.69529	1864287..1864886	8.00644	0.527549	1.44148	0.164169	0.718816	1
CCNA_01737	11.0878	2.46181	1.72811	2.76816	6.03247	3.22668	4.10717	2.48802	1.38096	2.30349	complement(1864901..1866424)	4.81567	0.701662	1.62638	0.0900252	0.628012	1
CCNA_01738	20.0076	34.5673	19.5084	23.2003	11.35	16.3337	13.7379	25.4121	17.4083	16.1954	complement(1866634..1869063)	21.7267	0.202395	1.15061	0.580219	0.90397	1
CCNA_01739	10.6419	18.1711	19.9774	17.7007	1.79604	20.1142	4.58559	14.8151	18.7074	20.8452	complement(1869268..1869852)	15.8135	-0.264476	-1.2012	0.534198	0.881341	1
CCNA_01740	2.12511	1.49415	2.35989	2.06191	2.82442	3.14738	0	0.647167	2.26299	3.31119	complement(1869866..1870144)	2.1731	0.0254328	1.01778	0.969378	0.998993	1
CCNA_01741	38.9046	8.75311	6.91243	6.03961	8.2731	7.83623	10.9525	6.63473	4.97145	7.75914	complement(1870159..1870539)	13.7766	0.703608	1.62857	0.114991	0.671519	1
CCNA_01742	6.73758	1.57904	1.74578	4.93921	0.397986	3.99145	4.96772	3.2829	3.50763	3.35936	1870808..1871467	3.82181	-0.425301	-1.34285	0.36048	0.809098	1
CCNA_01743	36.2332	24.9605	30.0755	30.7759	37.2928	26.2352	33.4861	26.9725	32.7379	31.0222	complement(1871442..1872251)	31.8676	0.007446	1.00517	0.978376	0.998993	1
CCNA_01744	5.06075	9.73813	9.02133	11.7157	12.0361	7.73186	8.03405	8.92253	9.83272	5.47819	complement(1872325..1873437)	9.5144	0.192164	1.14248	0.564706	0.899047	1
CCNA_01745	35.53	20.6872	19.4194	23.3413	23.6109	22.0352	26.7922	16.9063	19.7058	26.6421	complement(1873509..1874042)	24.5177	0.0325028	1.02278	0.910145	0.998993	1
CCNA_01746	6.27414	15.4395	11.496	9.74008	3.61346	15.7968	13.2473	10.3177	9.35369	10.558	1874210..1875154	11.8547	-0.374941	-1.29679	0.281093	0.779589	1
CCNA_01747	9.60173	10.9702	6.8862	14.233	10.9889	9.24336	9.25162	9.25946	9.37262	6.98166	1875173..1875913	10.536	0.182378	1.13475	0.554236	0.894594	1
CCNA_01748	38.252	17.9297	24.7788	18.9696	32.1984	19.262	11.8584	21.5506	21.951	24.0393	1875935..1876864	26.4257	0.312128	1.24154	0.303207	0.787913	1
CCNA_01749	535.367	59.8037	58.3401	83.3378	126.348	87.4414	71.6861	54.8535	70.1527	88.0945	1877029..1877265	172.639	1.06009	2.08506	0.0149192	0.370347	1
CCNA_01750	9.95121	13.0169	15.1624	16.4663	6.56165	15.0809	15.5896	13.9542	11.6647	14.2792	1877432..1878712	14.1137	-0.249709	-1.18897	0.424391	0.841024	1
CCNA_01751	2.42332	4.92213	4.63458	3.30917	2.8629	4.62588	2.7072	5.57586	2.86728	3.69193	1878709..1879809	3.89363	-0.157816	-1.1156	0.653075	0.925522	1
CCNA_01752	4.03338	12.0523	10.8242	13.4796	9.2322	15.1331	10.4761	11.0547	8.82874	6.91296	1879813..1880694	10.4811	-0.118242	-1.08541	0.742146	0.949874	1
CCNA_01754	2.90641	0.681155	2.68958	5.63993	6.86721	2.29574	2.92219	2.95032	4.8144	0.603806	complement(1881367..1881672)	3.75686	0.37947	1.30086	0.536753	0.882162	1
CCNA_01755	4.12488	2.1436	2.19071	3.01615	1.27124	2.12491	1.44253	1.20155	3.05565	1.7884	complement(1881785..1883437)	2.54932	0.303093	1.23379	0.413466	0.840597	1
CCNA_01756	0	0	0	0	2.18892	0	0	1.50466	0	0	complement(1883535..1883654)	0.437785	0.0263807	1.01845	0.987296	0.998993	1
CCNA_01757	1.42697	5.01645	4.3577	3.23058	4.10917	3.59278	3.94548	3.47648	4.55866	2.2234	complement(1883718..1884548)	3.62817	0.0290861	1.02037	0.938962	0.998993	1
CCNA_01759	32.9393	10.4989	9.99807	15.4827	10.896	10.5374	8.38993	10.9673	7.32706	11.7702	complement(1885591..1886940)	15.963	0.570945	1.4855	0.0953895	0.636703	1
CCNA_01760	13.6637	6.69045	8.12851	9.39061	15.0252	7.8055	11.898	8.47069	8.83404	9.42831	complement(1887107..1889536)	10.5797	0.0975525	1.06996	0.731297	0.948208	1
CCNA_01761	9.64076	3.95402	5.20423	7.44858	5.93204	3.17297	4.30805	2.44661	4.18254	4.33955	complement(1889529..1890635)	6.43593	0.713705	1.64001	0.0207503	0.40001	1
CCNA_01762	33.286	20.2948	12.273	22.7082	30.6449	22.8003	27.4532	13.9379	13.6613	14.7487	complement(1890632..1891771)	23.8414	0.278475	1.21291	0.369273	0.813767	1
CCNA_01763	25.8046	37.6924	42.7611	35.9708	42.3606	34.9588	52.8952	38.2562	37.9165	39.3965	1891999..1893480	40.6846	-0.191116	-1.14165	0.578925	0.90397	1
CCNA_01764	155.285	177.304	197.737	237.829	185.348	209.076	152.257	195.411	215.924	233.555	1893601..1894062	201.245	-0.148451	-1.10838	0.681114	0.93414	1
CCNA_01765	36.4066	205.996	188.667	255.116	51.4589	248.544	324.209	222.268	233.842	266.342	1894059..1894400	259.041	-0.854104	-1.80764	0.054672	0.546052	1
CCNA_01766	173.874	68.9474	89.4214	103.686	110.282	71.9477	75.0846	65.0106	87.2892	72.1663	complement(1894443..1895228)	109.242	0.454451	1.37026	0.184853	0.727631	1
CCNA_01767	0.742991	11.4926	14.4388	16.8209	12.5081	20.6875	12.6994	11.7658	15.2964	11.5767	1895423..1895821	14.4052	-0.381053	-1.30229	0.32937	0.794141	1
CCNA_01768	59.4393	74.7017	77.557	111.018	110.598	118.403	132.224	84.6231	102.328	75.4802	complement(1895834..1896232)	102.612	-0.301942	-1.2328	0.374221	0.817484	1
CCNA_01769	19.8589	11.952	8.11544	14.0787	23.3673	13.7412	19.0083	9.28923	8.45892	9.01049	complement(1896310..1898175)	15.4745	0.297086	1.22866	0.342255	0.802968	1
CCNA_01770	7.76425	0.49627	1.56764	4.56566	4.37785	4.18152	3.54837	4.72894	0.50109	3.51932	1898272..1898691	3.75433	0.006676	1.00464	0.990861	0.998993	1
CCNA_01771	12.1997	6.862	8.80588	2.36738	8.6476	3.61366	15.9458	11.1456	11.2591	10.6449	complement(1898688..1898930)	10.5218	-0.50596	-1.42007	0.274625	0.779053	1
CCNA_01772	13.3326	7.16834	5.66093	9.63862	17.3724	15.3322	18.1361	6.20972	15.5895	7.82072	1899035..1899412	12.6177	-0.334155	-1.26064	0.372887	0.816315	1
CCNA_01773	16.7894	7.08269	6.39232	9.61892	14.0261	11.3672	20.2567	7.30419	13.2813	7.77327	complement(1899409..1900026)	11.9965	-0.241156	-1.18194	0.49405	0.87703	1
CCNA_01774	3.56559	0	0.848465	1.31792	0	3.92287	1.53641	1.5512	0.723223	2.53972	complement(1900105..1900686)	2.05468	-1.01477	-2.02058	0.140758	0.699217	1
CCNA_01775	4.62305	4.87563	8.66328	5.79385	5.37631	8.38749	5.51969	5.27952	6.15374	9.1842	complement(1900847..1901872)	6.90493	-0.272458	-1.20786	0.404654	0.833592	1
CCNA_01776	8.61488	4.4537	5.62743	5.24466	7.18416	4.20296	7.38789	3.70378	3.23782	3.79004	1901998..1903167	6.22497	0.425969	1.34347	0.19145	0.727631	1
CCNA_01777	11.9779	5.20154	2.73848	5.01327	6.24292	3.75666	5.66727	3.86223	4.75187	5.15979	1903417..1905099	6.23483	0.301791	1.23267	0.37135	0.815271	1
CCNA_01778	26.1374	14.8305	17.8224	16.1652	17.6739	14.9409	12.2176	14.8022	16.6023	19.5768	1905204..1906496	18.5259	0.138722	1.10093	0.622267	0.920775	1
CCNA_01779	50.5069	57.8981	45.7229	73.8622	77.8284	73.5018	78.3796	60.8552	75.609	52.6921	complement(1906529..1906798)	68.2075	-0.224783	-1.1686	0.456392	0.852778	1
CCNA_01781	0	0.526347	0.831325	3.38966	2.65324	3.10446	4.51611	6.38342	5.3146	6.0655	complement(1908544..1908939)	5.07682	-1.77054	-3.41182	0.002245	0.13199	1
CCNA_01784	30.1734	10.6073	17.1723	16.5897	12.6991	12.9595	15.1686	11.0265	9.6393	16.4549	complement(1912227..1912619)	17.4483	0.318604	1.24712	0.33916	0.800085	1
CCNA_01785	20.8292	10.8985	11.5652	12.8465	24.4644	12.9135	8.76657	10.6211	12.7238	12.6799	complement(1912486..1913097)	16.1208	0.351623	1.276	0.253943	0.770264	1
CCNA_01786	9.20166	12.6579	9.55182	7.24591	9.21652	10.6654	5.63142	7.3101	5.68038	10.2231	1913996..1914736	9.57476	0.184155	1.13615	0.571071	0.9019	1
CCNA_01787	9.18499	6.68056	8.44114	9.42399	10.1027	9.00635	3.82132	7.71622	7.19515	7.10633	complement(1914921..1915856)	8.76668	0.195638	1.14523	0.532175	0.881341	1
CCNA_01788	72.4664	60.7931	100.133	86.291	79.5309	91.7146	62.9245	114.354	130.367	105.726	complement(1916111..1916470)	101.017	-0.416397	-1.33459	0.200653	0.731855	1
CCNA_01789	2.87261	3.23152	2.87097	5.20273	4.07242	2.38249	1.73293	3.14929	2.85505	2.5065	complement(1916649..1917164)	3.65005	0.433235	1.35026	0.349745	0.8054	1
CCNA_01790	15.8362	34.7389	17.5857	48.3492	19.6442	35.6501	34.3919	27.7784	18.8873	32.7681	1917304..1917771	29.8951	-0.193576	-1.1436	0.569686	0.9019	1
CCNA_01791	12.016	10.9702	11.8498	11.8326	8.5809	15.5118	12.4418	10.0493	12.3499	16.0956	1917887..1919539	13.2897	-0.327843	-1.25514	0.267784	0.779053	1
CCNA_01792	8.09982	2.27796	7.19573	5.23928	5.74144	9.59693	14.6588	2.95999	5.75022	2.01928	1919654..1919836	6.99705	-0.270459	-1.20619	0.62625	0.920775	1
CCNA_01793	49.5573	6.67654	10.2156	9.98138	36.2849	9.14158	12.2328	8.13331	10.7441	8.50768	1919960..1920958	22.5431	1.08277	2.11809	0.007975	0.280019	1
CCNA_01794	14.9957	11.084	11.3151	9.20238	15.331	12.7561	13.1442	8.66498	20.4726	12.4614	complement(1920971..1921741)	13.4998	-0.207103	-1.15437	0.508089	0.881341	1
CCNA_01795	16.4311	6.50846	12.5925	9.87979	4.10103	7.12915	6.28236	10.5714	10.8433	18.0293	1921855..1923135	10.5711	-0.19223	-1.14253	0.600963	0.911599	1
CCNA_01799	37.0567	35.1428	39.2366	42.7367	27.9979	40.3322	30.9038	34.4673	34.4645	57.4704	1923957..1924988	39.5276	-0.187205	-1.13856	0.572989	0.9019	1
CCNA_01800	70.1146	19.2566	17.397	15.1649	18.8315	17.3936	12.9976	16.5479	15.7105	22.8054	1924985..1926337	28.1529	0.586846	1.50196	0.0942782	0.634475	1
CCNA_01801	45.8096	62.1159	51.5972	66.4591	80.5988	62.0305	86.8529	49.4247	50.1754	48.5364	1926343..1926795	61.3161	-0.00657	-1.00456	0.982348	0.998993	1
CCNA_01802	48.142	17.8148	9.848	22.9454	76.3317	16.5116	12.7377	12.3459	16.1891	1.57918	1926792..1926908	35.0164	1.42409	2.68346	0.00761	0.274866	1
CCNA_01803	3.91586	9.87912	9.33642	8.93976	3.87781	12.0085	8.56903	6.59386	7.68572	9.04442	1926921..1928207	8.7803	-0.310763	-1.24036	0.34869	0.804638	1
CCNA_01804	2.4551	2.1577	5.45266	6.74924	1.6315	1.09083	2.46843	1.86915	5.6645	5.73803	1928226..1928708	3.68924	0.106277	1.07645	0.845451	0.987357	1
CCNA_01805	34.0678	8.92648	8.57671	6.98047	8.62446	9.90312	8.51001	5.92843	8.71275	10.6823	1928791..1930191	13.4352	0.491849	1.40625	0.168141	0.719432	1
CCNA_01806	4.47323	5.43242	2.8224	9.338	4.14364	6.38413	6.13299	5.69666	4.33041	5.57588	1930211..1931668	5.62402	-0.176108	-1.12983	0.571278	0.9019	1
CCNA_01807	9.5384	5.36508	4.34279	5.55283	5.40892	5.53769	7.09674	3.60189	5.95891	7.25266	complement(1931701..1933254)	6.0416	-0.0596932	-1.04224	0.848146	0.987362	1
CCNA_01808	22.0207	32.7068	21.0911	31.1584	29.0231	36.201	43.727	22.4652	25.0126	30.5368	complement(1933343..1934419)	31.5885	-0.266851	-1.20318	0.365243	0.812531	1
CCNA_01809	29.706	15.1317	14.3059	10.3918	13.429	11.6723	11.2764	15.3236	15.0635	13.0355	1934502..1935479	16.5929	0.202738	1.15088	0.506346	0.881341	1
CCNA_01810	15.2538	13.5225	9.94242	17.1595	12.3402	12.5726	10.0021	11.7142	9.88729	7.44018	1935483..1935929	13.6437	0.307429	1.2375	0.323609	0.79382	1
CCNA_01811	6.62802	7.20196	10.3713	10.5233	9.60991	10.3518	12.1164	8.0738	7.27192	6.0086	complement(1935926..1936417)	8.86689	0.0237976	1.01663	0.94315	0.998993	1
CCNA_01812	6.70826	8.34459	4.29771	8.67833	2.97191	5.65542	4.40999	6.91438	6.04449	8.68345	complement(1936456..1937604)	6.34154	-0.122884	-1.08891	0.718164	0.945097	1
CCNA_01813	31.7629	16.7491	8.1648	14.2677	38.8273	16.3776	15.672	13.2554	14.6151	13.9307	1937704..1938711	21.9544	0.467318	1.38254	0.189874	0.727631	1
CCNA_01814	12.1541	5.38731	7.33522	8.88717	10.0667	7.20026	7.17264	5.95428	7.69053	11.5272	1938708..1939829	8.76609	0.0387698	1.02724	0.90606	0.998993	1
CCNA_01818	7.54858	15.4395	15.0504	16.8676	16.1129	13.0092	11.7293	14.2107	13.1536	13.6863	1944941..1945804	14.2038	0.0589798	1.04173	0.846898	0.987357	1
CCNA_01819	34.5267	9.2079	4.62737	6.931	12.6588	6.34785	7.18225	5.80111	8.45213	2.96811	1945962..1946210	13.5904	0.972616	1.9624	0.0489194	0.527654	1
CCNA_01820	4.64245	5.28466	5.40082	5.86284	2.35052	5.89342	6.89035	7.00156	5.64988	5.92459	1946223..1947563	6.27196	-0.430042	-1.34727	0.165708	0.718816	1
CCNA_01821	1.43214	8.81059	11.7289	4.86342	2.22065	6.57529	5.3997	6.10588	6.10023	7.3638	complement(1947560..1948387)	6.30898	-0.117227	-1.08465	0.77911	0.963277	1
CCNA_01822	83.7119	48.3837	35.7629	49.1269	75.4737	54.4396	72.9865	30.4127	40.9596	32.9516	complement(1948350..1949762)	58.4918	0.254637	1.19304	0.488646	0.875818	1
CCNA_01823	125.891	16.1798	5.26126	13.1341	107.947	10.4252	21.7763	3.29789	11.5319	7.59306	complement(1950040..1950258)	53.6826	2.18159	4.53652	0.0002065	0.0351507	0.843616
CCNA_01824	0	0	0.489888	0	1.56352	0.52269	0	0	0	1.09979	complement(1950334..1950669)	0.410681	0.0257545	1.01801	0.983048	0.998993	1
CCNA_01826	97.1481	72.3593	62.2842	63.6247	25.4198	53.3256	25.7925	50.479	45.9064	87.1317	1951298..1953250	64.1672	0.200331	1.14896	0.626857	0.920775	1
CCNA_01828	9.77884	7.961	4.00075	4.32787	3.19218	4.57354	4.13977	6.5829	5.48068	10.5855	complement(1954767..1955342)	6.27247	-0.230346	-1.17312	0.563886	0.898742	1
CCNA_01829	2.54831	3.3843	6.60296	5.67764	4.26495	8.387	7.97113	5.86344	5.22627	7.23529	1955493..1956539	6.93663	-0.621968	-1.53897	0.0599948	0.569455	1
CCNA_01830	3.62539	2.25766	3.1057	2.41205	4.7725	2.57729	2.29119	3.15443	2.64727	2.19497	1956674..1959535	3.23466	0.222231	1.16654	0.468615	0.857249	1
CCNA_01831	12.4495	4.51332	5.07632	5.78796	14.1332	5.18574	8.6055	5.68691	5.52383	6.78925	1959650..1961173	8.39206	0.298352	1.22974	0.377895	0.820808	1
CCNA_01832	5.82805	6.8294	5.39326	6.78566	3.67211	6.52163	5.59927	5.99499	5.05688	4.84311	1961197..1963485	5.7017	-0.0344993	-1.0242	0.910072	0.998993	1
CCNA_01833	2.94351	5.61735	4.78631	10.8799	3.53954	5.97868	6.97595	5.89059	6.71674	4.58635	1963485..1964894	6.02966	-0.168541	-1.12392	0.617609	0.920213	1
CCNA_01834	0.705002	1.73488	1.89198	2.0521	1.76988	2.85397	1.18138	2.0754	2.50247	1.09848	complement(1965009..1967531)	1.94234	-0.302683	-1.23344	0.424392	0.841024	1
CCNA_01835	3.88367	6.67472	1.91677	1.39562	1.52938	3.06766	1.73545	3.94235	3.98247	2.95838	complement(1967528..1968214)	3.13726	-0.135127	-1.09819	0.776254	0.961783	1
CCNA_01836	9.83495	6.91485	5.46074	9.69391	9.12916	11.3753	8.00486	8.84257	6.98202	8.17284	1968272..1968904	8.67552	-0.210933	-1.15744	0.496212	0.878033	1
CCNA_01837	2.01669	1.0128	3.0393	3.72707	5.36063	2.04809	2.60697	1.93018	1.63621	3.23203	complement(1969053..1970081)	3.0313	0.335173	1.26153	0.425762	0.841024	1
CCNA_01840	5.95783	5.92222	4.22057	5.44842	6.18906	7.78927	4.13116	4.37947	4.08373	5.12168	complement(1970882..1972324)	5.54762	0.002442	1.00169	0.993561	0.998993	1
CCNA_01841	15.0057	7.59109	5.38514	4.37965	7.78284	4.11957	4.04777	7.35613	5.06658	7.52744	1972490..1974109	8.02888	0.380098	1.30143	0.25809	0.771693	1
CCNA_01842	0	6.39927	7.94134	8.41043	0	6.16224	2.61459	3.95964	2.76918	13.7763	1974143..1974370	5.85639	-0.340735	-1.2664	0.594202	0.908426	1
CCNA_01843	4.88453	1.84922	4.38105	2.30887	5.32666	2.44849	2.26664	2.28846	1.60044	3.39555	1974451..1976028	3.75007	0.543508	1.45751	0.145974	0.705683	1
CCNA_01844	40.1891	18.9485	20.4768	15.9034	55.7181	26.0495	17.1137	18.1423	20.8108	19.7436	complement(1976177..1976803)	30.2472	0.473488	1.38846	0.165712	0.718816	1
CCNA_01845	19.9856	25.7614	27.4337	31.2414	25.0865	26.6396	38.5138	26.0357	28.3764	28.3721	complement(1977086..1977619)	29.5875	-0.20407	-1.15194	0.465902	0.85582	1
CCNA_01846	38.7348	37.7563	46.1913	42.9925	43.876	42.374	38.9452	34.8519	33.9045	33.1945	complement(1977612..1978958)	41.9102	0.133341	1.09683	0.672295	0.927593	1
CCNA_01847	1.20509	4.23645	2.00735	5.19669	1.06777	2.14175	1.61552	4.40389	4.56277	4.25609	complement(1978955..1979692)	3.39601	-0.366571	-1.28929	0.448623	0.851243	1
CCNA_01852	12.6009	6.21725	9.45144	10.2957	13.5155	9.2985	8.66851	9.02124	10.9859	10.1958	1983992..1985332	10.4162	0.008403	1.00584	0.977223	0.998993	1
CCNA_01853	13.1757	3.60255	7.72208	4.73476	3.24285	5.63731	5.15171	5.34991	3.1179	5.0183	1985425..1985829	6.49559	0.297856	1.22932	0.486546	0.875709	1
CCNA_01854	1.33538	0.312963	0.494301	0.575849	1.1832	0.263699	0	0.542221	0	0.277424	1985974..1986639	0.780338	1.35527	2.55846	0.137028	0.699217	1
CCNA_01855	2.06732	0.581404	2.06614	4.814	3.29712	3.18425	3.32567	1.25913	2.05468	3.09229	1986769..1987485	2.58321	-0.0538431	-1.03803	0.913256	0.998993	1
CCNA_01856	8.49321	14.8813	13.9976	15.6964	9.19766	11.8999	13.8256	12.5628	16.8443	19.4931	1987428..1989626	14.9251	-0.313962	-1.24312	0.285484	0.781233	1
CCNA_01857	5.18852	3.648	7.72596	7.01739	7.94073	6.7064	2.1341	7.03852	5.52515	5.73255	1989653..1990909	6.30412	0.121696	1.08801	0.721828	0.946576	1
CCNA_01858	7.55086	3.0007	3.09883	3.61006	3.19976	2.91734	2.64065	1.59964	1.16533	3.68301	1990867..1991769	4.09204	0.626435	1.54375	0.121691	0.676136	1
CCNA_01859	8.89069	8.71034	11.0868	10.936	10.5895	11.4838	11.1371	10.7412	11.8991	12.354	1991852..1993885	11.523	-0.24911	-1.18847	0.360417	0.809098	1
CCNA_01860	1.8108	6.18389	6.31981	10.5417	4.12572	5.82348	4.94171	4.25402	6.24395	4.35309	1993888..1995033	5.79637	0.143222	1.10437	0.701968	0.940749	1
CCNA_01861	691.476	150.128	128.484	169.755	398.406	147.53	191.22	126.119	149.118	139.424	1995291..1996484	307.65	0.907222	1.87543	0.0488133	0.527654	1
CCNA_01862	19.1585	8.50748	6.71846	7.82685	5.36063	4.77888	5.0691	3.68489	5.0109	7.54141	complement(1996891..1997184)	9.51439	0.709428	1.63516	0.116673	0.674127	1
CCNA_01863	2.8882	5.65685	4.92547	6.40527	3.47303	6.23299	5.39293	4.02081	5.7118	3.98587	complement(1997194..1998630)	5.06888	-0.135543	-1.09851	0.683103	0.934832	1
CCNA_01864	19.4785	20.0417	20.3115	23.0478	15.996	19.7014	17.6736	14.7573	18.55	15.9892	1998726..1999349	19.7751	0.147372	1.10755	0.58908	0.906021	1
CCNA_01865	1.0889	5.93336	3.023	4.04998	1.44722	3.38668	6.56889	4.64248	3.28539	2.88429	1999438..2000526	4.15355	-0.423527	-1.3412	0.291017	0.782639	1
CCNA_01868	3.35608	3.9327	6.6255	8.20096	6.60807	5.96458	2.62446	4.99661	5.82399	7.20465	complement(2005193..2005987)	5.74466	0.0372499	1.02616	0.918389	0.998993	1
CCNA_01869	6.52153	22.3044	22.4011	21.5924	9.50003	21.0198	15.8923	22.5531	27.5432	28.3829	complement(2005990..2008671)	23.0783	-0.534637	-1.44858	0.156951	0.715952	1
CCNA_01870	1.54002	5.59431	1.71015	2.49036	1.36452	4.10549	2.58063	3.12657	2.55101	3.19939	complement(2008780..2009934)	3.11262	-0.341033	-1.26666	0.39752	0.8325	1
CCNA_01873	0	2.67222	2.11029	0.819478	2.24505	0.750529	5.0951	2.31487	1.79879	1.57918	2010241..2010474	2.30769	-0.366636	-1.28934	0.634541	0.922486	1
CCNA_01874	5.1254	6.34237	6.48847	7.29369	8.17441	6.43711	9.48196	4.99473	7.27725	5.87771	complement(2010768..2012213)	6.81375	-0.04336	-1.03051	0.89	0.995494	1
CCNA_01875	14.4864	8.91207	10.1979	9.87235	21.7746	12.5664	12.7444	7.09003	8.81499	9.02863	2012838..2013983	13.0487	0.300839	1.23186	0.367288	0.812531	1
CCNA_01876	18.9829	6.86046	7.88042	8.37721	17.7629	7.98768	8.20521	6.05107	9.572	7.85056	complement(2014046..2015716)	11.9728	0.487713	1.40222	0.128101	0.687638	1
CCNA_01877	5.85332	0.726249	1.52941	3.11801	1.22031	2.65169	4.15419	1.04855	0.977737	2.36052	2015915..2016775	2.48946	0.0511896	1.03612	0.923518	0.998993	1
CCNA_01878	4.44958	14.9905	13.4852	14.3908	10.6777	10.3243	10.6251	15.6959	13.0302	10.6306	complement(2016779..2018377)	12.0612	-0.113172	-1.0816	0.742001	0.949874	1
CCNA_01879	4.0279	1.13279	0.596385	1.21586	0.951706	0.954477	1.07994	0.817751	0.571897	0.669437	2018600..2019703	1.58493	0.758764	1.69204	0.174375	0.719777	1
CCNA_01880	0.398459	0.840457	0.22124	2.57739	2.11831	0.70816	1.60249	0.485375	0.848621	0.496679	2019780..2020523	1.23117	0.558193	1.47242	0.424365	0.841024	1
CCNA_01881	0.463933	2.60949	0.772781	1.50045	2.05533	1.92389	0	2.54309	0	1.44573	2020520..2021158	1.4804	0.170823	1.1257	0.807954	0.972736	1
CCNA_01882	3.69726	4.9627	8.21145	6.73978	3.87157	8.9604	2.70352	7.16506	10.0218	5.23709	2021155..2022036	6.81758	-0.363185	-1.28626	0.31293	0.790776	1
CCNA_01883	3.2855	6.57462	7.15662	7.68339	3.35896	7.63582	4.06565	7.54255	6.45907	5.35549	2022050..2023222	6.21172	-0.194708	-1.14449	0.584068	0.90397	1
CCNA_01884	8.25632	2.17685	1.14606	2.83715	3.88634	1.37564	2.59411	1.25716	2.01483	2.25127	2023230..2024378	3.66054	0.803268	1.74505	0.0659197	0.586216	1
CCNA_01885	1.52614	4.29206	2.33028	6.4166	13.1843	4.74659	4.9869	5.34475	3.79204	2.61571	complement(2024476..2025252)	5.54987	0.287588	1.2206	0.51944	0.881341	1
CCNA_01886	8.68615	7.11303	8.22728	9.71678	10.7748	9.20193	8.11685	7.71781	8.27032	7.45172	complement(2025426..2028326)	8.90362	0.0474714	1.03345	0.859589	0.988298	1
CCNA_01888	1.91507	2.15435	2.12664	2.22974	3.05431	2.49595	0.770189	2.09953	2.17528	1.43228	2028496..2029269	2.29602	0.210021	1.15671	0.653416	0.925522	1
CCNA_01889	6.89005	4.84432	5.43641	4.8086	6.58685	3.5447	8.02127	4.52779	7.07963	4.97226	complement(2029278..2030912)	5.71325	-0.0368779	-1.02589	0.910717	0.998993	1
CCNA_01890	3.93696	1.10722	1.20227	2.41925	2.093	1.86586	1.1875	2.15808	1.25772	0.858799	2031155..2032660	2.15174	0.375937	1.29768	0.378154	0.820808	1
CCNA_01891	4.65446	12.0831	7.15662	11.1164	3.48959	11.8779	11.8793	4.79747	9.15035	9.81841	complement(2032774..2033601)	9.5047	-0.324403	-1.25215	0.387686	0.83003	1
CCNA_01892	5.78093	5.46169	4.11255	3.85619	4.9621	4.2809	4.17761	3.96109	4.61699	5.06667	2033679..2035319	4.83469	0.0258823	1.0181	0.930954	0.998993	1
CCNA_01893	2.18382	0	1.51568	0.353145	1.93496	0.646865	2.19568	0.997566	0	0.340266	2035334..2035876	1.19752	0.472241	1.38726	0.554495	0.894594	1
CCNA_01894	2.72476	4.98094	6.35413	5.28744	4.18471	6.67198	4.93119	4.2042	5.15828	5.88711	complement(2035926..2037557)	5.37055	-0.210953	-1.15745	0.477907	0.866201	1
CCNA_01895	5.5585	9.84269	6.28689	10.52	11.4919	8.17138	7.86556	7.27253	8.33063	8.08345	2037657..2039096	8.74	0.070089	1.04978	0.81592	0.976574	1
CCNA_01896	0	0	0.79518	0	7.61365	0	0	1.74454	1.01671	2.67775	complement(2039570..2039776)	1.68177	0.394766	1.31473	0.724177	0.946576	1
CCNA_01897	0.367352	6.45704	5.0992	6.6533	3.25491	2.82913	4.80151	5.81728	8.60609	6.86857	complement(2040047..2040853)	5.78452	-0.434641	-1.35157	0.308694	0.790606	1
CCNA_01898	21.041	13.2087	11.2656	11.9089	20.3079	14.9136	22.6664	9.61153	7.46872	7.25944	complement(2040850..2041638)	15.5464	0.261059	1.19836	0.436016	0.847802	1
CCNA_01899	23.165	47.8304	37.4466	39.4516	54.3009	47.0762	47.7609	42.6842	53.0829	41.1197	complement(2041635..2042645)	46.3448	-0.253456	-1.19206	0.45437	0.852415	1
CCNA_01900	0	0.664859	0.787571	0.917501	1.2568	0	0	1.15189	1.34263	1.17872	complement(2042642..2043268)	0.73465	-0.0939887	-1.06732	0.904782	0.998929	1
CCNA_01901	8.08509	6.5267	5.98554	6.58562	3.18389	4.96714	3.01074	4.74197	4.67684	7.46523	complement(2043376..2044365)	6.07337	0.181919	1.13439	0.563571	0.89859	1
CCNA_01902	6.66868	0	1.68305	0.784285	0.537159	1.4366	0.609536	1.47697	0.860769	0.377842	2044927..2045415	1.93464	0.753532	1.68592	0.346783	0.803495	1
CCNA_01903	11.2935	14.1437	13.129	9.81617	7.81759	6.48135	12.7741	7.30836	9.77126	12.0977	2045412..2046251	11.24	0.184113	1.13612	0.56289	0.89859	1
CCNA_01904	27.8959	20.9431	12.8637	15.2917	30.5821	17.9265	15.2122	14.3987	18.4612	11.4925	2046262..2046888	21.5153	0.366495	1.28922	0.225627	0.748121	1
CCNA_01905	2.20868	4.60118	4.95079	5.1855	2.10195	4.60382	3.04314	4.63356	6.15578	4.74147	2046899..2050522	4.63556	-0.335267	-1.26161	0.313878	0.790776	1
CCNA_01906	0.830402	1.16769	2.582	3.11539	2.06016	1.08228	1.50284	2.52884	2.12227	2.48423	2050519..2052303	1.95113	-0.0439009	-1.0309	0.913952	0.998993	1
CCNA_01907	3.89046	5.74423	5.61635	4.78136	2.7577	4.14859	2.73811	2.84346	7.73336	4.12204	complement(2052344..2053105)	4.55802	0.0375224	1.02635	0.923191	0.998993	1
CCNA_01908	50.4988	7.40756	7.46358	11.2799	31.5463	11.1917	11.6888	8.85096	10.3166	13.5856	complement(2053105..2053920)	21.6392	0.825001	1.77154	0.0461747	0.526734	1
CCNA_01909	22.4343	9.57667	5.93161	8.11947	13.4885	8.70208	8.59281	6.01865	7.77367	6.15882	complement(2053976..2055085)	11.9101	0.55745	1.47167	0.0933499	0.633173	1
CCNA_01910	22.234	0	4.11506	0	0	0	0	6.01865	1.75382	3.07941	complement(2055307..2055426)	5.26981	0.908777	1.87745	0.39679	0.8325	1
CCNA_01911	45.4243	18.4901	11.9469	22.681	36.0113	23.1332	18.4286	11.649	13.0122	11.9203	complement(2055562..2055933)	26.9107	0.668461	1.58938	0.0534229	0.53989	1
CCNA_01912	7.38825	1.94798	6.15336	4.18163	4.90974	3.8298	1.85709	4.49992	4.58943	5.18031	complement(2056129..2056449)	4.91619	0.148532	1.10844	0.76255	0.955977	1
CCNA_01913	47.4637	35.5595	22.8974	36.2377	36.5395	26.2744	45.3745	28.4346	32.5906	27.157	2056542..2056922	35.7396	0.0834129	1.05952	0.787067	0.964914	1
CCNA_01914	9.45781	15.5924	10.3216	14.9778	17.9159	16.6157	27.8717	10.329	16.6699	10.3663	2057017..2057925	16.3705	-0.304205	-1.23474	0.35679	0.807471	1
CCNA_01915	0	1.12515	0.444271	1.29391	4.25378	2.6071	0.804489	1.70569	1.70411	0.49869	2057922..2058662	1.46402	-0.150687	-1.1101	0.816186	0.976574	1
CCNA_01916	10.5125	4.22357	5.83696	4.85709	7.45166	8.00716	6.34177	4.75638	4.47783	6.92633	complement(2058860..2059846)	6.57636	-0.0172777	-1.01205	0.958108	0.998993	1
CCNA_01917	19.9738	13.6738	14.4465	16.4898	19.7935	16.9707	17.1756	12.3254	16.4187	13.2677	complement(2059987..2061114)	16.8755	0.0628969	1.04456	0.832185	0.983012	1
CCNA_01919	176.493	92.7448	85.7463	80.2707	163.304	87.1312	76.7108	67.7448	93.3194	87.3693	2062750..2063394	119.712	0.444505	1.36085	0.193956	0.727631	1
CCNA_01921	3.02503	0.708957	2.79936	1.95671	0	0.59736	1.01382	2.45659	0	1.88535	complement(2066987..2067280)	1.69801	0.416436	1.33463	0.607073	0.915766	1
CCNA_01922	309.818	129.274	114.682	131.768	266.977	145.393	204.002	104.093	103.791	119.895	complement(2067304..2068035)	190.504	0.401636	1.32101	0.305999	0.789144	1
CCNA_01923	165.587	23.0698	15.9942	21.3475	28.2278	23.6199	30.8804	17.3123	18.4185	22.8281	2068157..2069710	50.8452	1.01449	2.02018	0.0307103	0.456526	1
CCNA_01924	12.6096	8.32286	9.43034	9.82093	17.101	9.90933	10.0907	8.46373	12.0575	9.78354	complement(2069785..2070936)	11.4569	0.0919593	1.06582	0.759053	0.954365	1
CCNA_01925	5.48988	6.71904	7.22534	7.10214	2.70238	5.05912	3.88423	8.42116	9.95995	8.11038	complement(2070969..2072426)	7.08697	-0.351406	-1.2758	0.328291	0.794141	1
CCNA_01927	16.9613	7.51812	7.16552	10.0172	17.6421	7.86375	7.41451	8.98306	10.9941	9.65188	2073818..2074621	11.8608	0.269321	1.20524	0.398877	0.8325	1
CCNA_01928	5.77038	23.8354	29.6364	32.6595	9.58653	35.4666	10.153	38.2206	38.4047	45.4044	complement(2074608..2075018)	33.5299	-0.770018	-1.70529	0.0590921	0.56751	1
CCNA_01929	11.7117	3.60255	4.06425	2.84086	9.07998	3.03547	0.735959	4.01243	4.15719	8.66797	complement(2075015..2075419)	6.25988	0.413419	1.33184	0.41858	0.840944	1
CCNA_01930	0.609986	4.50319	3.21753	3.15651	1.35119	1.98751	3.98644	3.34369	2.38173	1.71078	complement(2075420..2076391)	2.68203	-0.0463464	-1.03265	0.919238	0.998993	1
CCNA_01931	13.7394	28.237	35.7959	39.3086	14.983	30.9924	38.7854	44.0938	32.2627	19.1022	2076486..2077046	33.0473	-0.378533	-1.30002	0.282881	0.780791	1
CCNA_01932	7.60137	5.85344	5.62743	7.25823	6.41443	9.22078	7.27871	4.85019	7.19515	5.41435	2077043..2077861	6.79184	-0.129568	-1.09397	0.656842	0.925741	1
CCNA_01933	0	19.7027	13.1027	16.2183	3.92046	15.7275	16.3119	8.08475	13.6117	2.75768	complement(2077966..2078166)	11.2987	-0.0815328	-1.05814	0.879216	0.992477	1
CCNA_01934	60.4706	9.33284	14.331	15.2643	38.5512	13.5431	22.985	10.7797	15.1823	11.0307	complement(2078166..2078567)	27.59	0.787942	1.72661	0.0481958	0.526734	1
CCNA_01935	3.32161	5.83847	5.07178	6.98278	8.82927	7.87109	5.00947	7.08076	5.89518	8.79831	complement(2078573..2078929)	6.93096	-0.304331	-1.23485	0.455893	0.852415	1
CCNA_01936	2.17447	2.88783	4.56111	4.68845	2.78298	5.00964	0.971681	2.50164	2.57284	3.16223	complement(2078937..2080163)	3.41897	0.197562	1.14676	0.596315	0.909614	1
CCNA_01939	11.4021	4.27556	0.844114	6.39193	0	3.15222	7.64265	2.31487	0.539636	6.63257	complement(2081930..2082319)	4.58273	0.0560839	1.03964	0.931997	0.998993	1
CCNA_01941	4.94089	4.57091	5.19797	6.89655	2.76496	7.39469	4.96772	6.17704	6.46143	6.15882	complement(2083785..2084924)	6.23194	-0.402499	-1.3218	0.210154	0.733576	1
CCNA_01942	1.24299	1.3109	2.07047	0.402008	3.85471	1.10455	0.62487	3.02825	1.76485	0.774694	complement(2084921..2085397)	1.77622	0.125192	1.09065	0.855599	0.987462	1
CCNA_01943	11.8399	4.16226	4.04553	2.94559	4.84186	4.85596	3.20498	6.37921	5.49583	6.8116	2085576..2086226	5.56703	-0.122873	-1.0889	0.75717	0.954365	1
CCNA_01944	3632.27	213.654	137.961	277.107	1676.74	233.488	332.521	167.687	166.663	174.085	complement(2086293..2086811)	1187.55	2.31628	4.98046	0.0001558	0.0329237	0.636605
CCNA_01945	2.96993	2.46779	2.99822	2.61964	1.43536	2.39923	2.44314	2.95999	5.36687	4.20684	complement(2086909..2088006)	3.47522	-0.52957	-1.4435	0.155318	0.715952	1
CCNA_01946	2.90641	2.51503	1.86202	5.20609	1.38665	2.25159	2.47262	3.40421	2.53946	1.95076	2088215..2089540	2.77524	0.057235	1.04047	0.883815	0.994596	1
CCNA_01947	1.92502	9.02309	9.9759	3.32048	2.27421	2.66097	5.80643	4.68986	5.0109	3.59931	2089668..2090129	5.30374	0.306424	1.23664	0.533512	0.881341	1
CCNA_01948	9.00683	3.9805	8.43015	6.15889	4.33225	3.81128	2.06988	6.26943	8.03833	6.09466	2090363..2091514	6.38172	0.172882	1.12731	0.635652	0.922486	1
CCNA_01950	7.96918	6.91042	5.16226	8.07582	9.6501	6.92423	7.74537	4.04479	4.71456	7.11906	complement(2092058..2093173)	7.55355	0.223287	1.16739	0.460561	0.854522	1
CCNA_01952	14.2238	21.9311	32.1446	31.314	13.7084	34.0012	21.0752	28.7254	29.0531	32.1938	complement(2095782..2096969)	29.0097	-0.406934	-1.32587	0.195368	0.728462	1
CCNA_01954	34.2949	7.57377	8.11721	9.24305	14.4143	6.38158	9.61494	7.16346	4.83811	9.79656	2097480..2100176	14.7286	0.836702	1.78596	0.0205739	0.40001	1
CCNA_01955	12.9255	8.79466	5.5562	9.5744	8.86653	5.1872	8.38434	5.58693	4.58804	6.62658	2100319..2101740	9.14346	0.502078	1.41625	0.0928386	0.633173	1
CCNA_01956	8.80158	12.6579	5.99765	13.4567	5.31723	9.00635	12.0673	4.62973	6.81645	3.49083	2101765..2102505	9.24621	0.320032	1.24836	0.390215	0.83073	1
CCNA_01959	2.01669	6.61693	6.71846	4.34825	2.97813	5.17712	4.73116	5.32262	4.77229	3.7707	2103849..2104289	4.75478	-0.0319105	-1.02237	0.940633	0.998993	1
CCNA_01960	15.0249	3.65673	0.641724	3.36417	3.07217	1.71173	1.16204	2.81574	1.641	2.16099	2104350..2104862	5.15194	1.19933	2.29633	0.0477022	0.526734	1
CCNA_01961	11.0042	2.7853	5.86556	3.27426	6.04514	2.60763	6.85966	5.09373	3.12484	5.21236	2104868..2106214	5.79489	0.23632	1.17798	0.529615	0.881341	1
CCNA_01962	14.5054	22.9468	24.4135	27.5615	18.0737	25.5111	22.7877	21.2585	16.7337	24.0137	2106314..2106967	22.0609	-0.075873	-1.054	0.787339	0.964914	1
CCNA_01963	0	3.91424	3.8639	1.80054	2.46639	2.47357	2.33226	2.26053	3.29355	6.07207	complement(2106904..2107542)	3.2864	-0.4304	-1.34761	0.418599	0.840944	1
CCNA_01964	7.4862	4.73712	6.6506	11.1374	5.30648	4.87844	10.5376	8.20725	6.90897	8.39839	complement(2107547..2107942)	7.78613	-0.144955	-1.1057	0.695655	0.937808	1
CCNA_01966	2.93841	3.9789	5.07584	4.8573	2.12142	4.57757	3.82974	5.96562	6.18085	5.08713	2108222..2110945	5.12818	-0.488679	-1.40316	0.136695	0.699217	1
CCNA_01967	41.0749	3.34833	1.98316	5.00572	40.6138	4.2319	2.9926	2.90055	5.49388	4.82317	2111017..2111514	18.4052	2.0174	4.04854	0.0006573	0.062444	1
CCNA_01968	3.74826	5.74989	2.64877	7.05316	0.905762	7.06532	8.22243	3.32063	2.41906	7.64543	2111609..2112478	5.73458	-0.549313	-1.46339	0.190791	0.727631	1
CCNA_01969	13.3799	8.50054	8.86114	8.75892	8.14151	10.7915	8.26603	8.73833	5.83652	9.24325	complement(2112556..2114394)	9.5284	0.0494752	1.03489	0.870811	0.991045	1
CCNA_01970	38.9046	44.5861	40.3945	49.5752	69.9766	59.0022	85.6638	51.4192	56.8955	40.493	complement(2114516..2115277)	58.6947	-0.332992	-1.25962	0.32749	0.794141	1
CCNA_01971	11.1641	16.8656	19.3502	19.2246	7.75314	19.8415	17.899	14.8858	15.3158	25.3875	2115417..2117381	18.6659	-0.373401	-1.2954	0.271555	0.779053	1
CCNA_01972	4.80631	6.75854	6.29801	9.20238	3.57723	7.17529	6.76538	6.55728	7.23364	10.5443	2117381..2118922	7.65517	-0.368867	-1.29134	0.236662	0.758112	1
CCNA_01973	95.9944	73.4479	54.8674	68.4849	81.3029	60.2139	140.516	57.6071	67.1461	43.9916	complement(2118945..2119154)	74.8195	-0.0487308	-1.03435	0.880279	0.992477	1
CCNA_01974	21.3526	4.53875	3.5843	3.85443	13.6395	7.64861	8.48756	5.444	6.69799	8.0467	2119270..2119866	9.39392	0.228487	1.17161	0.59196	0.907767	1
CCNA_01975	5.48988	12.3922	16.8453	9.90561	3.5842	8.55866	5.51969	16.7185	17.6407	13.5062	2119875..2120900	12.3887	-0.414883	-1.33319	0.296527	0.784068	1
CCNA_01976	4.5088	3.17009	4.79829	4.13166	4.32791	6.00994	2.64441	4.57692	5.86828	4.91769	2120897..2121685	4.80345	-0.305271	-1.23565	0.382768	0.82658	1
CCNA_01977	26.0839	32.0938	37.321	42.1802	28.4449	27.9334	35.3036	40.939	38.4593	44.3935	2121781..2122371	37.4058	-0.23123	-1.17383	0.423965	0.841024	1
CCNA_01978	3.82745	1.71248	5.21627	5.40163	6.16598	3.2981	2.79872	3.17886	3.21121	3.90348	2122422..2123273	4.46476	0.366335	1.28907	0.325833	0.79382	1
CCNA_01980	1.54403	5.69935	5.7868	5.49306	5.81433	5.03089	6.20965	5.87759	6.02874	7.9391	complement(2124219..2124986)	6.21719	-0.356724	-1.28052	0.315405	0.790776	1
CCNA_01981	21.3697	13.7807	10.5049	17.7847	20.5023	17.4979	22.0331	10.943	10.8224	13.4035	complement(2125014..2127191)	16.7885	0.0895948	1.06407	0.782466	0.964029	1
CCNA_01982	11.749	21.9792	23.0653	19.8136	13.1986	17.5251	26.7898	17.3787	20.4053	18.1757	2127354..2128766	20.0549	-0.196139	-1.14563	0.521806	0.881341	1
CCNA_01983	52.996	9.9254	12.5925	13.9215	23.5809	13.847	9.77256	9.44378	12.9791	14.4235	2128834..2130114	22.6033	0.7718	1.7074	0.0354338	0.477291	1
CCNA_01984	57.2694	86.8472	84.1716	121.301	57.708	80.4942	95.9673	71.1295	65.3695	94.4819	complement(2130172..2130435)	81.4885	-0.0478549	-1.03373	0.871196	0.991045	1
CCNA_01985	1.50739	4.0038	5.48674	6.50026	2.67123	7.34246	4.37833	6.22267	6.30185	5.21934	complement(2130432..2132201)	5.89293	-0.581787	-1.4967	0.105953	0.65479	1
CCNA_01989	24.0868	2.60542	6.85843	6.79142	5.47231	8.78119	4.96772	4.51399	3.50763	7.3136	complement(2135120..2135599)	9.16288	0.500175	1.41438	0.266282	0.779053	1
CCNA_01991	388.776	140.913	137.297	137.741	147.984	153.087	162.326	105.397	111.322	219.751	complement(2136675..2137313)	190.542	0.240532	1.18143	0.54257	0.887049	1
CCNA_01994	13.5874	7.81625	5.48674	10.0673	7.22345	7.1713	7.20319	5.41678	6.83988	6.7747	complement(2140916..2142115)	8.83623	0.292034	1.22437	0.340796	0.801129	1
CCNA_01995	45.9047	51.4924	54.4783	54.8527	28.2542	55.4274	65.5316	45.46	45.2758	40.4036	complement(2142103..2142948)	50.4197	-0.156353	-1.11447	0.636603	0.922711	1
CCNA_01996	11.022	9.62	12.6617	11.0629	12.7968	14.4102	13.7568	11.1114	8.63417	11.607	complement(2142908..2143687)	11.9039	-0.113532	-1.08187	0.710581	0.943056	1
CCNA_01997	147.442	38.9664	81.2851	44.3038	63.004	43.6736	23.1301	47.7671	58.6461	72.6675	complement(2143739..2144305)	75.0003	0.498703	1.41294	0.186643	0.727631	1
CCNA_01998	15.6028	8.15731	5.10911	7.76347	10.6345	5.45121	4.82693	8.04111	3.97626	7.72969	complement(2144332..2145072)	9.45343	0.498373	1.41262	0.138006	0.699217	1
CCNA_01999	8.83993	3.10763	7.01181	4.69694	7.2731	5.98505	5.39625	6.34554	3.81021	7.28039	complement(2145250..2146188)	6.18588	-0.008123	-1.00565	0.980175	0.998993	1
CCNA_02000	527.151	90.6569	79.3436	96.4729	97.6472	107.072	89.7514	64.4376	69.6311	81.736	complement(2146328..2147134)	178.254	0.96999	1.95883	0.0370285	0.477291	1
CCNA_02001	2.27691	7.04383	12.6423	10.6041	7.66628	11.0608	4.12069	6.93393	6.78897	9.36594	2147447..2148097	8.04668	0.0405638	1.02852	0.914772	0.998993	1
CCNA_02002	56.9379	49.2961	37.6234	54.4836	75.4658	49.6207	102.193	38.9779	40.4213	39.5924	complement(2148110..2148739)	54.7613	-0.0491811	-1.03468	0.88541	0.994838	1
CCNA_02005	10.1906	20.4091	19.3751	23.9697	23.5309	23.7824	23.5967	17.4917	22.7996	16.1669	2152629..2153588	20.7675	-0.137043	-1.09965	0.663915	0.926901	1
CCNA_02006	4.74671	10.6189	4.55232	8.93195	6.49986	9.71427	8.67724	9.72446	6.43321	5.91677	complement(2153585..2154271)	8.09319	-0.255508	-1.19376	0.446098	0.850132	1
CCNA_02007	15.2739	5.04405	6.55325	4.9399	8.40711	3.97587	6.9804	4.65142	3.12155	5.62515	complement(2154264..2155544)	8.04365	0.618925	1.53573	0.0574144	0.560336	1
CCNA_02008	37.168	13.6139	7.53809	19.4349	27.0165	17.0086	25.0624	10.1666	9.95409	11.2357	complement(2155544..2156875)	20.9543	0.411994	1.33052	0.247177	0.767425	1
CCNA_02009	17.773	7.4976	3.55257	6.89776	13.228	2.1058	10.0069	4.76296	8.07513	7.08929	complement(2156875..2157291)	9.78979	0.496967	1.41124	0.237663	0.758112	1
CCNA_02010	4.54335	0	0	1.46941	6.03841	0	0	0.691799	4.03176	2.12373	complement(2157310..2157570)	2.41023	0.56302	1.47736	0.558363	0.897291	1
CCNA_02011	177.872	15.3844	28.2175	28.3071	125.707	29.2706	29.8063	14.6167	25.5556	31.234	complement(2157570..2157989)	75.0976	1.40378	2.64594	0.002378	0.134906	1
CCNA_02012	8.64656	6.45151	7.54427	7.98991	5.94137	8.99026	10.2903	6.44855	6.88999	5.93886	complement(2158098..2159777)	7.71159	-0.113879	-1.08213	0.701997	0.940749	1
CCNA_02013	32.0592	41.6336	35.601	33.9114	26.0666	42.677	48.1603	39.282	47.1255	48.1892	complement(2159777..2160562)	45.0868	-0.462117	-1.37756	0.0971853	0.636703	1
CCNA_02014	4.33066	9.96494	9.3996	12.9876	4.18599	7.92989	6.72918	6.23446	5.31036	6.13428	complement(2160559..2161311)	8.17375	0.309664	1.23942	0.364702	0.812327	1
CCNA_02021	1.23522	2.60542	5.48674	2.39697	0	1.46353	0	3.00932	0.876908	3.07941	complement(2168059..2168298)	2.34487	0.431178	1.34833	0.573375	0.9019	1
CCNA_02025	3.33094	8.58714	4.31542	5.02736	3.93514	9.20874	4.46537	14.2013	15.7646	6.92002	complement(2172762..2173028)	10.112	-1.06903	-2.09802	0.0247607	0.419699	1
CCNA_02026	0	6.48459	5.12096	10.2271	3.50228	16.3916	9.27308	6.41989	6.54758	6.56941	complement(2173025..2173249)	9.0403	-0.794261	-1.73419	0.134045	0.699217	1
CCNA_02028	1.7805	4.38148	6.92022	2.87925	0.788802	11.0754	5.37051	5.42221	4.42404	9.98727	complement(2173934..2174266)	7.25588	-1.05976	-2.08458	0.0418883	0.507755	1
CCNA_02030	5.24034	6.31616	12.0542	10.6532	1.32662	12.4178	11.2903	10.943	9.56627	16.3302	complement(2175516..2175911)	12.1095	-0.761615	-1.69539	0.0473148	0.526734	1
CCNA_02034	13.1562	8.42778	8.44114	10.0228	17.356	10.0455	10.8761	10.3279	7.67943	4.19091	2177948..2178961	11.4808	0.319911	1.24825	0.329046	0.794141	1
CCNA_02035	25.2562	8.62007	11.3002	14.7506	22.8126	9.87793	15.5318	10.0062	14.2742	11.309	complement(2178958..2180166)	16.5479	0.338	1.264	0.299029	0.784543	1
CCNA_02036	8.50045	9.71195	24.7788	17.8699	20.7124	13.8485	13.8883	16.8263	30.9275	39.7343	complement(2180650..2180928)	23.045	-0.540142	-1.45412	0.161093	0.718816	1
CCNA_02040	7.09007	78.2014	56.8358	77.391	12.9569	85.5805	75.2955	59.3768	76.759	64.35	2185464..2186132	72.2723	-0.671866	-1.59313	0.15062	0.711814	1
CCNA_02042	10.6419	9.3146	7.47644	6.32168	12.893	8.10571	9.82626	5.02656	6.93818	6.76793	complement(2187021..2188385)	9.32953	0.277475	1.21207	0.354711	0.806898	1
CCNA_02043	4.28755	4.73712	7.70865	10.6972	9.94966	13.3048	8.00583	9.69948	9.13144	9.03463	complement(2188693..2190144)	9.83524	-0.458472	-1.37409	0.173222	0.719777	1
CCNA_02044	17.6832	57.4106	28.5888	65.6013	42.8568	65.3197	38.6959	37.6958	32.1225	30.1458	complement(2190154..2190723)	42.4282	0.0007676	1.00053	0.998126	0.998993	1
CCNA_02045	5.92524	9.00389	8.80851	8.65444	7.62101	8.26598	10.5696	9.77885	9.76981	5.83718	complement(2190729..2192279)	8.84429	-0.187124	-1.13849	0.543365	0.887049	1
CCNA_02048	101.944	20.7382	18.7923	21.8046	43.357	20.6143	19.8162	17.5509	16.5973	19.3999	2194602..2196782	41.3272	1.00508	2.00705	0.0125925	0.346057	1
CCNA_02049	15.721	14.2114	8.31325	19.8537	21.8892	17.2963	11.2903	10.487	9.03481	11.6644	complement(2196860..2197255)	15.9977	0.305637	1.23596	0.333792	0.794141	1
CCNA_02050	22.7886	11.3433	6.94241	11.4794	17.154	11.5888	11.152	7.12412	7.44477	12.9461	2197425..2198894	13.9415	0.368473	1.29099	0.257526	0.771265	1
CCNA_02051	2.41019	0.924316	0.973258	1.84246	0.388279	1.55764	0.660894	0.667256	0.933295	0.955914	2198894..2200246	1.3077	0.301169	1.23214	0.553148	0.893479	1
CCNA_02052	1.98771	3.29421	2.99564	3.30617	2.2644	3.44855	2.85501	3.28604	2.72144	5.75177	2200445..2202532	3.61256	-0.432948	-1.34999	0.185675	0.727631	1
CCNA_02053	18.6449	36.0498	53.3146	27.7385	23.9543	24.3001	25.3073	43.7204	46.3272	43.5765	2202810..2203127	36.6463	-0.243185	-1.1836	0.478864	0.867476	1
CCNA_02054	6.1882	4.48682	4.18753	3.87768	3.59823	4.46792	3.88863	3.18011	3.98127	6.50834	complement(2203400..2204932)	4.46769	-0.0826553	-1.05897	0.791934	0.965975	1
CCNA_02055	23.5712	7.64893	4.53034	17.006	26.5081	11.2786	13.6726	7.17821	4.50522	3.9552	complement(2205060..2205386)	15.8529	0.860221	1.81532	0.0524343	0.53989	1
CCNA_02056	7.75842	0.287098	0.9069	1.32065	0.723611	0.967624	0.410555	1.49223	0.289887	2.03597	complement(2205383..2206108)	2.19934	0.814103	1.75821	0.249028	0.767425	1
CCNA_02057	4.9102	1.43846	1.02237	2.51442	2.35661	2.30287	2.26273	1.86915	1.16195	2.80526	2206163..2207611	2.44841	0.0745965	1.05307	0.847147	0.987357	1
CCNA_02058	3.39081	13.9637	18.5581	10.3399	4.93581	12.3396	13.8804	12.9814	15.8187	18.567	2207608..2208831	14.7174	-0.541426	-1.45541	0.147772	0.70938	1
CCNA_02059	14.5846	15.0675	11.2379	13.477	14.7686	10.7561	10.7734	13.2338	13.1008	13.7275	complement(2208899..2209894)	13.8271	0.0674209	1.04784	0.820254	0.977747	1
CCNA_02060	40.1447	19.5406	14.1455	23.4704	46.5146	19.2089	22.51	13.1658	20.8266	14.9159	complement(2209891..2210274)	28.7632	0.563913	1.47827	0.0949398	0.636703	1
CCNA_02061	15.1842	11.8621	14.9882	19.4876	10.6777	23.7021	14.782	16.2944	14.7149	15.4722	2210438..2211667	16.9931	-0.306139	-1.23639	0.307199	0.789289	1
CCNA_02062	2.60504	1.95368	1.63927	2.13439	2.9237	2.57211	2.09535	2.6444	2.21924	1.84007	complement(2211778..2213484)	2.27423	-0.146799	-1.10711	0.663418	0.926901	1
CCNA_02065	15.3654	3.1716	4.14832	3.7385	9.36772	3.0064	6.51969	2.40403	2.60195	3.86573	2215780..2217882	7.15831	0.85514	1.80893	0.0279041	0.443533	1
CCNA_02066	1.2456	3.795	8.06874	6.98278	2.57521	6.14929	5.00947	8.85096	10.3166	12.6799	complement(2218017..2218730)	8.60124	-0.936763	-1.91423	0.0256783	0.424679	1
CCNA_02067	41.4553	10.8453	6.9588	6.54783	11.5319	10.566	6.30052	8.22059	8.21299	9.31333	complement(2218802..2219416)	15.4678	0.702232	1.62702	0.0855997	0.614968	1
CCNA_02068	0	2.94397	2.32489	4.8752	1.48402	1.48834	5.89391	1.53017	0	0.521934	complement(2219512..2219865)	2.32562	0.409088	1.32785	0.590869	0.907767	1
CCNA_02069	15.3444	22.0085	23.685	32.1581	22.0252	28.7252	22.2159	23.9251	27.451	30.6028	complement(2219865..2220830)	26.584	-0.263601	-1.20047	0.340314	0.801129	1
CCNA_02070	7.41597	11.6014	11.1176	10.0736	9.52778	9.99485	14.1669	14.115	12.3721	14.4438	complement(2220831..2222429)	13.0185	-0.435701	-1.35257	0.156934	0.715952	1
CCNA_02071	31.3556	11.3569	7.91357	4.30226	9.26083	5.06607	10.5086	4.05101	6.0709	8.29072	complement(2222587..2222898)	12.8379	0.798371	1.73914	0.0817882	0.612743	1
CCNA_02072	11.6464	6.20337	9.01394	7.07677	6.87948	8.78119	8.51609	6.6635	6.51418	4.39916	2223019..2223858	8.16399	0.156061	1.11424	0.634816	0.922486	1
CCNA_02073	0.494089	2.77911	2.74337	1.27839	0	2.92706	2.48386	3.91212	3.15687	4.61911	2223933..2224532	3.41981	-1.13899	-2.20227	0.0379868	0.484925	1
CCNA_02074	28.953	41.1556	50.3243	46.8198	34.5766	36.1688	29.743	40.2521	44.6832	62.3727	2224538..2225008	42.644	-0.136804	-1.09947	0.658804	0.925741	1
CCNA_02076	10.6351	11.2161	25.0963	11.752	7.85264	16.0135	6.2375	12.1453	21.7064	24.58	complement(2226974..2227642)	16.1365	-0.316913	-1.24566	0.405938	0.834878	1
CCNA_02077	9.73205	3.68443	6.0271	1.45271	1.32662	4.2132	2.6344	3.41969	3.45449	5.13235	complement(2227639..2228430)	4.44458	0.126337	1.09152	0.771706	0.959925	1
CCNA_02080	42.0222	13.1569	13.8536	19.1121	28.5069	15.7536	16.5041	13.5969	12.8186	14.7321	complement(2230926..2231828)	23.3303	0.550911	1.46501	0.093467	0.633173	1
CCNA_02081	8.84935	4.83925	3.0027	5.40611	0.871214	5.825	0.988601	5.68927	6.63135	8.57945	complement(2231825..2232427)	5.54273	-0.411977	-1.33051	0.34672	0.803495	1
CCNA_02082	47.4325	9.2637	11.7051	13.6361	32.6879	10.1472	6.62363	11.2348	19.6427	18.0659	complement(2232512..2232736)	22.9451	0.639278	1.55755	0.140244	0.699217	1
CCNA_02085	10.2816	14.257	8.24597	7.02003	10.1222	11.5052	14.6447	7.13193	10.7459	7.83202	complement(2234353..2235390)	10.372	-0.10331	-1.07424	0.741112	0.949874	1
CCNA_02087	16.011	11.2572	16.6686	9.87107	9.75318	14.8206	16.0979	11.7326	11.7217	17.9307	complement(2236357..2237541)	14.4607	-0.242566	-1.1831	0.43613	0.847802	1
CCNA_02088	62.3175	19.4037	16.8062	25.9132	67.8369	25.3151	21.482	14.64	18.9602	18.31	2237630..2237962	38.4555	0.850469	1.80309	0.0275099	0.442342	1
CCNA_02089	108.304	83.9292	77.6923	111.475	147.796	89.9194	146.25	92.4465	85.8669	65.0371	complement(2237967..2238341)	105.839	0.0652575	1.04627	0.850967	0.987462	1
CCNA_02090	10.8963	6.34018	3.33794	7.04813	13.6496	8.68102	5.6666	4.11923	7.20198	7.02527	2238341..2239129	8.25441	0.213645	1.15961	0.537221	0.882407	1
CCNA_02091	2.57506	3.62099	2.32338	2.70668	4.27803	2.47895	3.55993	3.13676	3.65616	4.01226	2239178..2240098	3.36881	-0.198495	-1.1475	0.580588	0.90397	1
CCNA_02092	3.24753	12.7213	8.243	14.1042	18.909	15.666	16.3258	16.3888	14.1623	11.2767	complement(2240106..2240744)	14.7639	-0.424606	-1.34221	0.210481	0.733576	1
CCNA_02093	9.46469	8.45915	6.14587	6.5372	8.52828	8.45807	9.03222	6.35085	8.08578	7.7985	2240848..2242695	7.94508	-0.112642	-1.08121	0.67213	0.927593	1
CCNA_02094	18.0843	22.4781	9.50318	19.4264	12.876	12.4352	12.0134	8.26089	7.33623	9.25835	complement(2242725..2243642)	16.4736	0.666974	1.58774	0.0307371	0.456526	1
CCNA_02095	42.1854	64.399	78.7717	76.4414	70.916	79.2532	76.4041	80.9526	67.8963	44.6604	2243761..2244786	69.8333	-0.13081	-1.09491	0.712658	0.943582	1
CCNA_02096	147.022	41.7996	49.0684	69.6356	112.472	59.4931	75.9294	64.1011	68.4416	57.5824	complement(2244856..2245224)	83.9994	0.251062	1.19008	0.440646	0.847876	1
CCNA_02097	51.9389	16.8463	14.3779	17.0387	33.3613	15.4288	17.806	13.687	15.1082	13.4492	2245508..2247499	26.7126	0.709154	1.63484	0.0527722	0.53989	1
CCNA_02098	4.62692	8.82995	6.0556	8.33729	5.85665	7.63582	13.6238	6.24007	8.6811	6.59138	2247588..2248484	8.55444	-0.346416	-1.2714	0.296364	0.784068	1
CCNA_02099	6.28079	8.09593	7.20716	15.0319	7.23458	10.0463	13.4718	6.88574	9.06634	7.82901	complement(2248481..2249896)	9.45983	-0.153893	-1.11257	0.643541	0.923733	1
CCNA_02100	16.0579	3.90813	10.2876	3.59546	7.114	6.95177	4.34676	6.01865	5.6999	8.46837	complement(2250015..2250494)	8.19262	0.250196	1.18937	0.535795	0.882162	1
CCNA_02101	15.3206	19.3891	19.5651	26.2614	22.3983	20.4214	13.8634	25.1943	11.964	20.052	2250611..2250997	20.5869	0.0832155	1.05938	0.794389	0.967526	1
CCNA_02102	18.4573	14.774	15.2935	24.2452	11.5736	14.9718	16.2736	13.836	14.1112	13.4503	2251005..2252048	16.8687	0.154329	1.1129	0.61022	0.916452	1
CCNA_02103	6.34125	22.6639	18.7782	23.5852	9.8326	19.0963	13.2827	21.5641	23.6343	31.2881	complement(2252045..2252605)	21.7731	-0.468712	-1.38387	0.192179	0.727631	1
CCNA_02104	1.7646	1.86101	0.489888	6.84849	1.56352	4.18152	0	2.6869	1.87909	3.84926	complement(2252605..2252940)	2.51935	-0.142915	-1.10413	0.835237	0.983552	1
CCNA_02105	13.0225	3.23152	7.23059	4.45948	9.50231	4.99189	6.16151	6.06531	4.35055	2.86457	complement(2253002..2253388)	7.48928	0.488519	1.403	0.259561	0.771693	1
CCNA_02106	8.27062	12.4607	11.212	11.6722	9.51706	12.0264	12.3113	11.9719	13.268	12.7193	complement(2253663..2256422)	12.4594	-0.280171	-1.21434	0.331095	0.794141	1
CCNA_02108	9.81775	6.45258	5.8067	8.28327	13.0484	6.32195	6.86683	5.0697	7.27285	5.18777	complement(2256813..2258201)	8.68175	0.403097	1.32234	0.196936	0.729152	1
CCNA_02110	0	0.485859	1.91844	0.893976	1.22457	1.63752	0	0.841769	0.981156	0.430687	complement(2260320..2260748)	0.90457	0.167767	1.12332	0.835746	0.983868	1
CCNA_02111	9.6147	7.13556	4.74529	5.18264	5.20609	2.84795	1.61115	4.55465	9.10089	4.99364	complement(2260760..2261314)	6.37686	0.324283	1.25204	0.422853	0.841024	1
CCNA_02112	1.47931	4.36836	4.27112	5.54988	2.88361	3.85601	4.46202	3.06338	5.04091	3.68791	2261538..2262539	4.02205	-0.0925945	-1.06629	0.790359	0.965784	1
CCNA_02113	2.21565	5.60807	9.34961	10.0322	3.92632	12.6008	4.00982	6.74736	11.6397	5.79978	2262551..2263219	8.15949	-0.419817	-1.33776	0.303533	0.78826	1
CCNA_02114	1.61996	2.27796	0	0	10.0475	1.91939	0	4.93332	0	1.00964	complement(2263333..2263515)	2.78909	0.548832	1.4629	0.591893	0.907767	1
CCNA_02115	19.0733	14.3042	11.8005	15.6273	20.2797	16.8952	19.3595	13.0552	14.7011	15.397	2263969..2265600	16.217	-0.0558984	-1.03951	0.845252	0.987357	1
CCNA_02116	18.5748	15.1493	13.2012	24.991	29.9537	17.1662	29.5075	13.3496	8.96688	14.1236	complement(2265728..2266525)	20.374	0.231269	1.17387	0.467706	0.856377	1
CCNA_02117	10.428	11.8706	15.7158	18.3085	8.7997	11.1787	6.98976	13.61	16.5687	17.0219	complement(2266640..2267236)	13.0738	-0.0734742	-1.05225	0.817269	0.976574	1
CCNA_02118	4.47938	8.20754	6.18012	5.88268	3.84866	5.87021	3.27542	6.53123	6.93818	5.41435	complement(2267319..2269502)	5.71968	-0.0400888	-1.02818	0.90387	0.998437	1
CCNA_02119	0	0.291923	0.691606	0.268568	0.735773	0.245972	0	0.252884	0.589518	0.258774	complement(2269507..2270220)	0.397574	0.464155	1.37951	0.621599	0.920775	1
CCNA_02120	11.9316	6.23794	9.00302	8.11359	9.21652	9.06211	7.68997	5.21741	8.03606	4.95756	complement(2270198..2271166)	8.90053	0.265989	1.20246	0.39026	0.83073	1
CCNA_02121	4.71108	4.60492	8.80431	8.47302	4.37785	9.4619	8.89569	6.29859	8.48358	10.6705	2271309..2273888	8.76205	-0.53832	-1.45228	0.0898149	0.628012	1
CCNA_02122	6.28079	1.17759	0.697467	1.89591	4.45205	1.73639	0.841986	1.53017	0	0.782901	2273885..2274592	2.90076	1.33524	2.52317	0.036862	0.477291	1
CCNA_02123	0.598896	7.57939	11.306	11.6217	6.36778	6.74111	5.41933	7.6601	9.35369	7.09197	2274928..2275422	7.49475	0.0254847	1.01782	0.951747	0.998993	1
CCNA_02124	60.959	44.2131	33.4905	61.844	65.3835	52.459	55.4836	39.8638	35.0763	37.1929	complement(2275567..2276028)	53.178	0.187291	1.13862	0.513685	0.881341	1
CCNA_02126	112.542	50.1784	33.5301	73.6847	108.23	71.5504	100.734	35.9447	54.5632	51.3235	2279405..2279620	75.6332	0.178789	1.13193	0.588791	0.905981	1
CCNA_02127	13.1995	3.51151	7.32886	6.92266	8.0603	7.0799	5.3802	4.12832	7.3445	5.33616	complement(2279617..2281278)	7.80456	0.30909	1.23893	0.340822	0.801129	1
CCNA_02128	4.67049	1.38264	2.04729	4.45209	2.17803	2.03875	3.70725	2.84464	3.14116	3.83011	2281453..2282658	3.11238	-0.174746	-1.12877	0.644923	0.924057	1
CCNA_02129	3.13707	2.94086	3.48365	4.22746	2.77959	2.94255	5.25685	2.22913	3.52619	3.5845	2282731..2283864	3.50784	-0.0548169	-1.03873	0.872275	0.991389	1
CCNA_02130	7.87228	6.11754	3.91089	6.70013	7.70942	8.71369	10.8311	4.03767	6.32403	7.10136	complement(2283929..2285359)	7.40157	-0.266685	-1.20304	0.4172	0.840944	1
CCNA_02132	17.7291	28.4042	29.2088	32.1476	21.1167	32.3699	33.6052	29.5622	34.4573	29.7072	complement(2288142..2289161)	31.9404	-0.357843	-1.28151	0.199461	0.731798	1
CCNA_02137	6.28559	5.50606	5.72132	7.26507	6.75622	7.99677	6.52693	4.2049	4.16966	6.42213	complement(2294518..2297394)	6.30685	0.0390657	1.02745	0.896709	0.996733	1
CCNA_02138	1.49159	1.04872	0.414094	2.41205	1.32161	0	1.49969	0.227119	1.05891	0.464816	complement(2297404..2298198)	1.33761	1.06625	2.09398	0.136873	0.699217	1
CCNA_02146	10.2005	12.1026	10.9735	10.3096	10.1679	8.30908	7.05096	10.0958	11.7675	16.2911	2303983..2304447	10.7508	-0.0792308	-1.05645	0.813079	0.976177	1
CCNA_02147	143.735	116.849	131.682	142.366	152.031	157.529	167.096	124.75	123.724	137.734	2304546..2304875	142.167	-0.11355	-1.08189	0.723222	0.946576	1
CCNA_02148	5.13339	9.02309	8.55077	6.64096	1.1371	3.80138	1.29032	13.2879	10.9329	5.59893	2304950..2305180	6.98229	-0.271778	-1.20729	0.632711	0.922486	1
CCNA_02150	18.0887	4.71036	6.5097	4.55018	4.45205	7.14402	4.04154	8.77295	5.70734	6.68075	complement(2307274..2308158)	7.66219	0.0892072	1.06379	0.817358	0.976574	1
CCNA_02151	0	0	1.291	2.25597	0	0.688721	0	0.708076	0.825325	0	complement(2308196..2308450)	0.709394	0.65913	1.57913	0.560654	0.898314	1
CCNA_02152	5.83923	5.05293	4.48915	7.26355	7.16375	7.7168	4.96772	8.7544	5.42089	5.03903	complement(2308548..2309207)	6.37977	-0.221009	-1.16555	0.502922	0.881341	1
CCNA_02153	1.28753	4.75255	2.14466	2.91488	3.70762	1.52551	3.55993	2.35257	1.37106	3.61103	complement(2309204..2310124)	2.96145	0.22716	1.17053	0.604564	0.914153	1
CCNA_02154	183.282	19.0191	10.4217	15.712	107.612	15.0441	26.0875	14.7944	13.3251	12.0424	2310141..2310677	67.2094	1.90284	3.73949	0.0002703	0.0357862	1
CCNA_02155	8.29768	7.42511	7.53904	7.15635	9.35723	8.78864	8.34274	3.82866	10.7103	8.30578	2310846..2312024	7.99523	-0.0701667	-1.04984	0.833962	0.983447	1
CCNA_02156	10.7	5.3104	6.52352	7.19261	9.1089	3.97733	7.59397	4.9836	7.74509	6.14574	complement(2312039..2313451)	7.76709	0.266488	1.20288	0.411789	0.84024	1
CCNA_02157	0.851877	2.39579	1.89198	3.8572	2.2644	0	1.71301	2.0754	1.20953	1.06187	complement(2313463..2313810)	2.25225	0.909938	1.87896	0.186102	0.727631	1
CCNA_02158	1.54887	6.31616	0.859991	3.00561	2.47026	0.917575	3.11456	1.69805	0.879657	2.12373	2313968..2314924	2.84018	0.666749	1.58749	0.192628	0.727631	1
CCNA_02159	2.67075	9.01333	2.96581	6.21917	8.99234	4.43015	10.204	2.92799	3.03363	4.66073	2314921..2315475	5.97228	0.23086	1.17353	0.593761	0.908426	1
CCNA_02160	3.48769	4.49562	5.16399	7.14392	4.12033	3.78796	3.50663	1.41615	2.06331	3.62283	complement(2315586..2316095)	4.88231	0.751591	1.68365	0.0885965	0.625072	1
CCNA_02161	4.87442	2.49248	1.23021	0.8599	4.71159	1.05007	0.445535	1.07958	0.943758	2.48562	2316227..2316895	2.83372	1.0096	2.01336	0.0786715	0.605204	1
CCNA_02163	11.7066	9.19915	6.69115	11.8039	13.4234	11.0147	16.6168	10.2757	10.7551	9.2275	2317218..2318078	11.578	-0.203608	-1.15157	0.532085	0.881341	1
CCNA_02164	4.46634	5.49542	4.02981	4.51407	1.97869	4.29964	1.12265	6.29068	4.75611	4.34945	complement(2318142..2319203)	4.16371	-0.130223	-1.09446	0.733918	0.948628	1
CCNA_02165	5.3188	2.55867	2.79777	2.53504	4.21662	5.14102	1.9702	1.705	3.57719	1.2213	complement(2319266..2320324)	3.48538	0.232653	1.17499	0.555697	0.895472	1
CCNA_02166	16.2163	14.2519	16.0382	15.734	4.4901	15.9112	7.64265	17.593	22.6647	12.3176	complement(2320321..2320905)	15.2258	-0.276393	-1.21116	0.424646	0.841024	1
CCNA_02167	0.468331	0.987836	1.04014	3.02935	1.24489	2.21957	2.82524	0.285244	0.332477	2.3351	complement(2320949..2321581)	1.59953	-0.202076	-1.15035	0.755442	0.953285	1
CCNA_02169	0	4.14106	2.54352	2.53984	0.579847	0.775381	0	2.39152	1.39376	3.26295	2322045..2322497	1.96085	0.270482	1.20621	0.703875	0.94088	1
CCNA_02170	8.07645	4.67639	7.12222	8.91182	13.8913	3.37738	4.29899	4.62973	6.0709	3.25707	complement(2322614..2323237)	8.53563	0.884397	1.84599	0.0142413	0.369542	1
CCNA_02171	5.32274	3.25423	2.18442	2.54479	5.94649	3.56457	1.62876	2.67809	2.62867	1.58658	complement(2323300..2324580)	3.85053	0.515252	1.42924	0.169498	0.719432	1
CCNA_02172	70.0574	13.1351	13.3756	14.9463	71.4395	11.7956	35.0953	9.13278	13.2627	8.27304	2324890..2326095	36.5908	1.13807	2.20086	0.0118363	0.338121	1
CCNA_02173	3.16217	8.33733	8.55932	12.0168	3.85251	10.3033	7.15352	11.0743	10.3826	9.85411	2326092..2326841	9.75356	-0.477348	-1.39218	0.183968	0.727631	1
CCNA_02174	7.66944	6.01449	8.8443	6.10572	2.87501	7.16475	5.93161	3.77288	3.97881	6.25074	2326862..2327866	6.30179	0.177453	1.13089	0.603896	0.914153	1
CCNA_02175	3.95271	6.35225	5.95704	4.74829	4.50293	2.67617	12.4903	2.75138	8.01745	9.15024	complement(2327877..2328401)	7.0171	-0.453185	-1.36906	0.269289	0.779053	1
CCNA_02176	39.2134	12.131	11.3219	13.1897	38.9142	23.2307	18.9246	17.1961	18.9301	6.84313	2328416..2328604	22.954	0.295949	1.22769	0.487657	0.875743	1
CCNA_02177	0	6.53909	6.45499	10.5279	10.3008	4.82104	3.50663	5.66461	3.3013	2.89827	2328683..2328937	6.76455	0.691136	1.61455	0.209491	0.733576	1
CCNA_02178	24.5408	16.5642	13.626	11.4293	15.6559	17.0584	14.8045	12.5555	13.473	17.1305	2329001..2329906	16.3633	0.0156777	1.01093	0.95585	0.998993	1
CCNA_02179	6.8465	4.33233	1.64729	2.80477	4.65083	2.16319	3.44184	2.91898	3.24031	2.41801	2330137..2331435	4.05634	0.387338	1.30798	0.280517	0.779589	1
CCNA_02180	2.96184	0.757251	1.64453	1.91584	3.8172	2.87123	3.79009	0.983975	1.72037	1.84597	complement(2331553..2332653)	2.24233	-0.0906141	-1.06482	0.843507	0.987031	1
CCNA_02181	10.2379	10.0148	11.1218	13.8204	11.0432	12.9213	12.0836	10.3022	12.9561	7.76788	complement(2332741..2333406)	11.2476	-0.0323337	-1.02267	0.913069	0.998993	1
CCNA_02182	8.43155	36.7545	30.898	34.6866	7.1719	39.3605	29.8402	30.8122	31.1258	29.8482	complement(2333403..2334281)	32.1974	-0.487505	-1.40202	0.200024	0.731855	1
CCNA_02184	1.88824	3.09774	1.74737	2.8499	2.23075	3.72874	0.632831	3.45018	2.68099	1.56913	2335149..2335619	2.41237	-0.176573	-1.1302	0.730641	0.947997	1
CCNA_02185	9.3565	18.235	16.2233	18.5812	10.3265	24.9919	10.5626	18.4958	16.3146	16.4713	2336026..2337831	17.3672	-0.313885	-1.24305	0.30745	0.789289	1
CCNA_02186	7.4379	5.60305	2.94986	5.15478	2.35368	1.88843	8.54662	4.20658	3.01732	4.63567	2337874..2338431	4.69985	0.031421	1.02202	0.943723	0.998993	1
CCNA_02188	6.25429	1.75893	2.43084	2.02276	4.43326	2.22309	1.88648	5.33298	2.22002	2.33879	2339575..2340048	3.38002	0.0552611	1.03905	0.915928	0.998993	1
CCNA_02189	21.4488	7.80952	7.23059	9.41446	6.44799	9.75688	6.54661	7.69827	9.24492	12.4131	2340056..2340829	10.4703	0.0578306	1.0409	0.865642	0.990345	1
CCNA_02190	10.3946	5.26199	5.3867	5.46855	6.63124	6.15792	3.48367	3.883	4.42759	5.09636	2340908..2343046	6.62861	0.393733	1.31379	0.185797	0.727631	1
CCNA_02191	41.3656	10.2332	8.93191	12.3875	35.2943	11.3452	12.323	4.66562	10.8764	10.026	2343127..2343513	21.6425	1.02128	2.02971	0.0112964	0.327124	1
CCNA_02193	19.9856	2.73227	0.616488	2.15458	4.42704	2.30218	0.558171	0.338126	0.394116	1.73001	complement(2343879..2344412)	5.9832	2.24583	4.74309	0.002104	0.13199	1
CCNA_02194	383.132	40.2791	42.8061	46.2864	88.3118	41.3826	38.7568	32.2984	36.4371	60.3936	2344537..2345928	120.163	1.3686	2.5822	0.00646	0.258841	1
CCNA_02195	6.81502	14.8539	16.271	11.4614	5.43457	12.112	12.3337	10.7921	11.6115	11.8929	2345936..2346370	11.7484	-0.0985596	-1.0707	0.782281	0.964029	1
CCNA_02196	50.5234	22.9851	18.9767	23.5492	28.9662	26.4096	26.8929	22.174	20.0436	25.4688	complement(2346386..2346784)	29.0001	0.135949	1.09882	0.6591	0.925741	1
CCNA_02197	38.6242	34.5626	29.2441	50.9407	41.7785	62.9987	67.5812	29.0239	34.8983	42.8304	complement(2346873..2347463)	47.4665	-0.341752	-1.26729	0.260717	0.774074	1
CCNA_02198	8.21038	2.26782	3.58185	2.27606	2.0785	2.43198	2.35856	2.14314	2.28985	2.0103	complement(2347464..2348474)	3.68292	0.576029	1.49074	0.160849	0.718816	1
CCNA_02199	1.19538	5.32289	6.85843	5.15478	3.17747	4.24896	4.00623	6.06719	7.35471	5.21513	2348573..2349316	5.37844	-0.316758	-1.24553	0.421111	0.841024	1
CCNA_02200	34.6994	18.5628	21.3606	30.7398	28.0717	20.1096	20.4776	20.2153	19.8141	26.7979	complement(2349330..2349722)	26.6868	0.199717	1.14847	0.525292	0.881341	1
CCNA_02201	3.17062	100.687	90.0765	69.7301	7.02329	68.8721	34.535	75.6354	63.7751	98.1459	complement(2349785..2350345)	68.1927	-0.358803	-1.28236	0.521788	0.881341	1
CCNA_02202	39.3785	143.657	160.271	151.388	70.4406	137.77	149.032	151.824	141.36	160.685	2350414..2351211	148.134	-0.434763	-1.35169	0.294676	0.783181	1
CCNA_02203	11.7762	17.2794	23.3116	32.1252	9.52692	16.0761	22.136	22.7648	21.8091	28.0817	complement(2351214..2351792)	22.1735	-0.28958	-1.22228	0.396903	0.8325	1
CCNA_02204	34.2956	59.6692	55.1902	64.1072	24.4644	64.7397	86.2046	39.8293	48.4879	78.4344	complement(2351931..2352950)	63.5392	-0.461157	-1.37665	0.209999	0.733576	1
CCNA_02205	4.02706	12.4145	15.3078	17.6329	3.56815	13.9471	14.6384	11.1317	20.0122	17.7621	complement(2353231..2354187)	15.4983	-0.582187	-1.49712	0.137581	0.699217	1
CCNA_02206	11.5638	0	2.04294	2.37997	6.98593	4.35946	0.528481	3.20141	1.86576	1.31039	2354280..2354843	4.59452	0.824795	1.77128	0.201608	0.731855	1
CCNA_02207	8.10493	7.67105	5.53867	5.64586	4.69548	3.69345	3.76105	4.55671	5.31124	8.35423	2354920..2355870	6.3312	0.20062	1.14919	0.528139	0.881341	1
CCNA_02208	3.52921	2.48135	4.50697	5.02223	2.50163	4.59967	3.90321	4.94389	2.756	6.15882	2355989..2356828	4.47232	-0.355819	-1.27971	0.34124	0.801129	1
CCNA_02209	0.869365	3.66745	6.59696	5.62339	1.02706	6.18031	6.99269	6.8835	5.96606	8.30808	complement(2356825..2357847)	6.86613	-0.94475	-1.92486	0.0173577	0.37716	1
CCNA_02210	17.8102	0	1.59498	2.22974	10.181	5.78605	2.31057	1.39969	0.815729	1.07421	2357949..2358464	6.36319	1.31996	2.49659	0.0637158	0.580501	1
CCNA_02211	24.3802	31.9124	30.0979	36.2377	31.2539	35.6472	32.5966	25.2752	33.3271	29.5817	2358556..2359698	31.2856	-0.0751922	-1.0535	0.810428	0.974279	1
CCNA_02212	4.87588	20.3405	16.2436	24.18	14.4008	19.4496	17.9753	18.0164	16.8459	14.7893	2359781..2360692	17.4153	-0.167743	-1.1233	0.62098	0.920775	1
CCNA_02213	2.98625	4.19921	1.35661	3.16084	2.16487	3.85986	3.82132	2.31487	2.50545	4.73755	complement(2360757..2361848)	3.44781	-0.393545	-1.31362	0.289069	0.781233	1
CCNA_02214	8.73899	2.83583	8.21145	7.39202	1.78688	3.9824	5.40704	4.91318	7.15844	7.96038	2361994..2362434	5.88429	-0.0774631	-1.05516	0.858365	0.987725	1
CCNA_02215	20.3017	5.15924	6.38309	4.74648	8.01883	4.63693	3.44297	3.27748	4.16749	6.25029	complement(2362451..2363662)	8.92186	0.898856	1.86459	0.0161459	0.371511	1
CCNA_02216	7.13118	4.29759	5.09079	12.5203	8.12384	3.62111	3.07282	5.58431	3.61612	5.71437	complement(2363669..2363959)	7.43274	0.658083	1.57798	0.165912	0.718816	1
CCNA_02217	6.84876	8.25479	10.8648	10.1258	12.1366	10.4331	12.7882	4.76725	4.86207	14.6348	complement(2364081..2364383)	9.64616	0.0009228	1.00064	0.998117	0.998993	1
CCNA_02218	118.411	46.7178	48.7185	52.3477	151.338	53.9993	102.352	34.244	45.0549	49.3767	complement(2364482..2365177)	83.5065	0.472244	1.38727	0.237578	0.758112	1
CCNA_02219	99.5692	57.0616	51.9467	63.6762	39.617	54.7572	33.6218	44.1673	44.0121	66.74	2365451..2366239	62.3742	0.258128	1.19593	0.455429	0.852415	1
CCNA_02220	128.074	124.859	164.489	125.456	133.964	140.475	112.108	115.762	142.92	161.685	complement(2366252..2367700)	135.368	-0.0541531	-1.03825	0.888568	0.995494	1
CCNA_02221	6.69765	5.24943	5.24289	6.67601	4.86428	6.2444	5.4093	5.21616	5.84606	8.00646	complement(2367923..2370622)	6.14448	-0.183091	-1.13531	0.523274	0.881341	1
CCNA_02222	42.9403	11.6119	3.20952	9.61459	12.9262	9.94712	8.8561	6.53837	3.32199	8.23463	complement(2370800..2371876)	16.0605	0.981453	1.97445	0.0210532	0.40001	1
CCNA_02223	18.4006	9.82272	6.43273	8.15521	9.05762	12.7176	6.50943	9.33928	7.74098	13.1671	complement(2371873..2372742)	10.3738	-0.0696582	-1.04947	0.831328	0.983012	1
CCNA_02224	98.8178	5.95524	10.2768	10.3488	22.2367	7.61966	11.9856	8.407	10.0218	8.79831	complement(2372739..2373683)	29.5271	1.48556	2.80027	0.002258	0.13199	1
CCNA_02225	4.84995	4.47556	5.21746	3.92143	4.83443	3.77106	2.74291	4.80015	7.74692	3.40057	complement(2373680..2374657)	4.65977	-0.0336336	-1.02359	0.925371	0.998993	1
CCNA_02226	48.6246	174.246	154.587	218.644	103.54	279.697	357.991	181.992	179.279	195.518	complement(2374701..2375078)	238.896	-0.811488	-1.75502	0.0421385	0.507775	1
CCNA_02227	2.03748	16.2354	14.1411	13.6185	3.91148	16.8985	10.9256	14.0642	10.3662	16.7198	complement(2375110..2375982)	13.7949	-0.48935	-1.40381	0.223719	0.748121	1
CCNA_02228	6.81502	4.79157	1.13519	2.64493	2.41536	2.82613	3.42601	0.415079	1.45143	1.69898	2376055..2376489	3.56042	0.754202	1.6867	0.182172	0.727631	1
CCNA_02229	1.13584	20.7635	29.0104	14.6941	6.03841	22.8782	9.13604	17.9868	14.5143	22.6531	2376611..2376871	17.4337	-0.282349	-1.21617	0.546829	0.888094	1
CCNA_02230	14.2051	86.413	71.6706	94.6804	29.2769	117.083	119.225	71.4715	82.6486	75.638	complement(2376868..2377827)	93.2132	-0.68891	-1.61207	0.115071	0.671519	1
CCNA_02231	24.349	13.2458	11.6445	14.0254	15.1178	16.2147	17.5121	12.4486	11.7342	12.1847	complement(2377969..2379636)	15.6765	0.0650033	1.04609	0.807745	0.972736	1
CCNA_02232	4.35208	7.19977	6.53861	7.86571	6.01104	7.27974	5.79138	5.3014	7.63319	7.02041	2379875..2382190	6.60523	-0.0932664	-1.06678	0.750087	0.952215	1
CCNA_02233	13.5102	11.1273	8.78736	12.2345	12.9967	11.8912	9.31448	9.16904	10.1393	15.6376	2382349..2383116	11.7312	-0.06207	-1.04396	0.834185	0.983447	1
CCNA_02234	0	9.9254	9.79776	6.27778	2.34528	6.27228	1.77419	8.59807	5.0109	16.4968	complement(2383122..2383457)	7.63045	-0.434198	-1.35116	0.439403	0.847876	1
CCNA_02235	15.9595	23.3642	10.318	25.0303	8.32953	28.105	42.2036	14.1145	15.2101	18.2584	2383642..2384997	23.5783	-0.564661	-1.47904	0.108814	0.659812	1
CCNA_02236	7.19865	3.22082	1.8168	5.07968	7.53802	2.90768	1.97393	4.38445	3.01982	6.32197	2385001..2385906	4.97079	0.257361	1.19529	0.522591	0.881341	1
CCNA_02237	20.5926	28.8629	29.1042	33.2138	21.0895	28.122	26.3511	24.8402	30.9469	36.8362	2385974..2388190	29.4193	-0.20566	-1.15321	0.534301	0.881341	1
CCNA_02238	70.1749	15.1039	9.54216	21.3064	81.2123	27.998	30.2383	14.8286	9.15035	18.7442	2388328..2388534	39.4679	0.858667	1.81336	0.0614386	0.573345	1
CCNA_02239	5.05462	3.55385	5.89369	6.86601	10.3008	10.0314	6.09848	4.00217	6.45907	5.98555	complement(2388542..2389714)	6.51533	-0.110772	-1.07981	0.742966	0.949874	1
CCNA_02240	9.19235	8.07881	3.40263	6.44147	5.09052	7.94164	6.54661	6.06531	7.06965	5.25171	complement(2389711..2390484)	6.57498	-0.150708	-1.11011	0.658059	0.925741	1
CCNA_02241	17.1031	4.89907	4.57229	8.60451	6.17389	12.0085	5.0951	7.71622	6.74545	2.76357	complement(2390484..2390951)	8.27057	0.111293	1.0802	0.789391	0.965468	1
CCNA_02242	45.6606	57.4989	64.7057	70.0908	9.05762	65.4047	25.3525	39.4325	46.4459	69.2336	complement(2391126..2391560)	49.4027	-0.0518306	-1.03658	0.892522	0.99606	1
CCNA_02243	37.8219	20.1363	18.6938	17.6768	9.68551	20.334	12.749	18.775	19.4006	20.7111	2391809..2393164	20.8028	0.0691432	1.04909	0.829665	0.982372	1
CCNA_02244	1.3918	5.21899	5.40947	5.40163	3.90512	5.63425	4.66453	5.36875	6.91646	6.07207	complement(2393276..2394553)	5.73121	-0.44452	-1.36086	0.201449	0.731855	1
CCNA_02245	4.58096	21.1654	17.8047	23.2818	7.53802	29.4645	18.4233	20.7265	21.371	14.2754	complement(2394654..2395106)	20.8521	-0.518019	-1.43199	0.157872	0.715952	1
CCNA_02247	35.9337	8.50253	10.5514	11.6217	21.7362	9.41573	15.6327	8.83858	12.0192	8.39839	2396214..2397071	17.6691	0.585648	1.50071	0.0921009	0.632933	1
CCNA_02248	42.821	34.7389	47.5518	46.8741	52.5342	37.0761	52.989	28.087	58.4606	20.5294	complement(2397073..2397162)	44.904	0.169133	1.12438	0.635261	0.922486	1
CCNA_02249	19.3178	9.40301	9.48835	4.80596	10.5332	5.28192	6.72323	4.5253	8.43942	9.26138	complement(2397237..2397635)	10.7097	0.524492	1.43843	0.169661	0.719432	1
CCNA_02250	6.63814	2.97004	4.60719	3.22036	4.41127	4.73693	6.37082	2.75663	4.06993	4.79542	complement(2397843..2399807)	4.54594	-0.125929	-1.09121	0.68741	0.935624	1
CCNA_02251	29.2924	2.97762	4.50697	4.10909	5.62866	3.13614	3.90321	3.43923	1.00218	1.5397	complement(2399868..2400707)	9.30295	1.66538	3.17198	0.001278	0.0948954	1
CCNA_02252	16.0044	6.93469	8.26628	7.22251	12.3668	8.48903	8.04565	7.59415	7.00206	7.887	complement(2400729..2402321)	10.1589	0.267016	1.20332	0.361455	0.809952	1
CCNA_02253	6.8438	9.62361	7.87793	9.71745	4.58491	5.73546	6.88096	8.43831	7.82107	9.88324	2402492..2404267	7.75181	-0.0686491	-1.04873	0.819418	0.977035	1
CCNA_02254	41.8763	52.4225	44.2342	54.0093	62.4437	51.8854	49.5488	51.0108	49.125	52.3579	complement(2404518..2405678)	50.9972	-0.0664323	-1.04712	0.843366	0.987031	1
CCNA_02256	4.43672	4.11195	4.14305	6.52237	5.00326	5.25677	5.67739	3.07074	4.29506	4.52485	complement(2407281..2408750)	4.84347	0.05033	1.0355	0.870657	0.991045	1
CCNA_02257	111.17	6.68056	8.96872	10.4483	80.8218	9.56924	18.1513	9.25946	2.69818	5.92194	complement(2409069..2409380)	43.6179	2.12233	4.35395	0.0002702	0.0357862	1
CCNA_02258	10.2084	14.0678	15.1906	13.7347	12.3014	9.91815	13.1378	13.43	11.8854	10.9434	2409393..2410118	13.1006	0.11729	1.0847	0.710518	0.943056	1
CCNA_02259	16.2082	11.0282	18.5794	11.1605	9.72855	6.19484	5.25685	11.7825	26.3536	12.0569	2410154..2410720	13.341	0.0249808	1.01747	0.949013	0.998993	1
CCNA_02260	29.2793	16.9835	3.65783	12.7839	14.9171	10.4073	9.56746	11.1456	6.23579	8.21176	complement(2410926..2411330)	15.5243	0.623767	1.54089	0.114162	0.670993	1
CCNA_02261	32.8901	15.0362	12.9389	17.0769	15.1591	14.4169	16.7568	13.7441	14.3446	19.9472	complement(2411414..2413423)	18.6203	0.125224	1.09068	0.695274	0.937808	1
CCNA_02262	1.66717	3.40995	3.45025	4.16652	2.61865	3.59149	2.51434	2.44623	3.44308	4.0618	2413447..2417358	3.21139	-0.111372	-1.08025	0.728491	0.94683	1
CCNA_02263	10.2433	2.96551	1.67279	2.72826	5.33884	5.71134	2.42328	5.13787	2.1388	2.62876	2417355..2417846	4.58974	0.132831	1.09644	0.794304	0.967526	1
CCNA_02264	1.54403	1.80932	1.42884	4.66078	0.456026	2.43922	0	2.1943	4.74992	1.60386	complement(2418025..2418600)	2.19746	-0.240189	-1.18115	0.688127	0.935624	1
CCNA_02265	0	4.34236	3.08629	7.98991	1.64169	4.02471	6.83062	6.39482	7.89217	7.3136	2418653..2419132	6.49118	-0.914922	-1.88547	0.0589654	0.56751	1
CCNA_02266	31.733	10.177	5.10035	7.38222	9.86557	7.25582	9.7955	4.7471	5.73078	5.37812	2419189..2420253	12.8516	0.839949	1.78999	0.0349277	0.477189	1
CCNA_02267	0.475085	2.00417	3.16543	2.15113	0.841894	1.40724	1.433	1.15743	2.69818	2.66487	2420364..2420987	1.87214	-0.0426338	-1.02999	0.937487	0.998993	1
CCNA_02268	0.914979	2.89491	3.30221	1.77553	2.43214	3.52332	0.919948	3.06505	4.22215	3.42157	complement(2420938..2421585)	3.03041	-0.4701	-1.38521	0.328481	0.794141	1
CCNA_02269	2.98543	6.92679	6.13322	5.9864	3.17427	6.89761	4.50247	8.00062	11.021	5.76808	2421986..2422978	7.23795	-0.566748	-1.48118	0.118832	0.676136	1
CCNA_02270	4.06897	20.0259	14.201	25.9437	16.9964	17.5624	19.8709	18.0559	19.3951	15.2159	complement(2423096..2423605)	18.0201	-0.193263	-1.14335	0.582494	0.90397	1
CCNA_02272	0	6.00425	6.09638	7.10214	1.08095	7.22732	2.4532	8.91652	3.46433	6.84313	complement(2424687..2424929)	5.7809	-0.496289	-1.41058	0.38196	0.826433	1
CCNA_02273	25.0021	4.18541	5.94948	0	2.10981	7.05316	2.39408	1.45028	0.845213	2.22608	complement(2424964..2425212)	7.44936	1.23038	2.3463	0.0951144	0.636703	1
CCNA_02274	3.04993	0.85775	3.72557	0.789127	1.62143	1.0841	2.4532	0.743043	0.866082	3.04139	complement(2425338..2425823)	2.00876	0.27726	1.21189	0.668152	0.927415	1
CCNA_02275	3.01734	3.71255	3.14127	1.95173	1.00256	2.68128	2.27529	2.52691	3.74862	2.35069	complement(2425820..2426605)	2.71656	-0.116544	-1.08413	0.78531	0.964828	1
CCNA_02277	2.2887	5.01679	4.63458	6.70543	3.22076	6.54003	7.58017	5.65786	7.07261	6.46089	2426768..2428969	6.66231	-0.633136	-1.55093	0.0488485	0.527654	1
CCNA_02278	7.78859	5.47608	6.21651	8.1867	10.7829	4.32571	9.29918	6.22619	4.83811	7.58475	2429076..2429684	7.69015	0.195278	1.14494	0.562773	0.89859	1
CCNA_02279	1.88224	2.64677	3.9191	5.47879	3.3355	3.06645	1.41935	3.15263	1.00218	3.51932	2429681..2430310	3.45248	0.423005	1.34072	0.375572	0.819221	1
CCNA_02280	5.28437	7.05924	5.28136	5.12721	4.21397	5.00888	4.78176	6.43706	3.00118	7.57502	2430307..2430867	5.39323	-0.0721938	-1.05131	0.840907	0.98613	1
CCNA_02281	2.82812	3.62594	4.80321	5.05758	2.50584	4.13928	5.68695	4.66091	4.25168	3.11051	2430959..2432740	4.36987	-0.226889	-1.17031	0.487109	0.875743	1
CCNA_02282	7.95086	12.3782	9.77523	16.8982	19.1216	16.4858	17.1301	11.0688	15.3207	12.3884	2432848..2433369	14.4787	-0.18218	-1.1346	0.588016	0.905748	1
CCNA_02283	0.525627	3.69563	2.62663	5.43994	1.39719	3.42529	1.58544	3.20141	0.373152	1.96558	complement(2433397..2433960)	2.737	0.323022	1.25095	0.575307	0.902508	1
CCNA_02284	6.46471	2.27264	2.05112	3.88295	2.45487	2.18846	4.64273	4.49992	5.57288	4.89252	complement(2434123..2434764)	4.3593	-0.475884	-1.39077	0.267008	0.779053	1
CCNA_02286	0	7.51111	5.93161	3.45509	4.73281	3.16439	0	1.62666	5.68805	1.66455	complement(2435476..2435586)	4.32613	0.7526	1.68483	0.35474	0.806898	1
CCNA_02287	1.41168	1.65423	1.82891	1.52189	0.833876	0.836304	3.31181	0.286602	1.00218	1.17311	2435754..2436383	1.45012	0.305053	1.23546	0.623177	0.920775	1
CCNA_02288	2.82337	0.744405	0.783821	1.14142	2.18892	1.67261	1.77419	0.644855	0.751636	0.659873	2436380..2437219	1.53639	0.315978	1.24486	0.566783	0.899609	1
CCNA_02289	1.90034	5.34444	2.63786	6.76069	10.1027	7.88055	6.68732	2.31487	4.72181	2.96097	complement(2437366..2437677)	5.34921	0.0730938	1.05197	0.889477	0.995494	1
CCNA_02290	13.7247	18.3344	8.38252	14.2043	7.70177	10.5699	13.3392	5.85146	7.79474	3.99183	complement(2437686..2438333)	12.4695	0.539098	1.45306	0.130382	0.691702	1
CCNA_02291	8.61366	8.57958	9.29957	9.44086	7.84409	8.07954	10.1038	10.784	8.66292	7.90357	complement(2438351..2439589)	9.10678	-0.0996777	-1.07153	0.725243	0.946643	1
CCNA_02292	0.406658	0.571834	1.12896	0.263042	1.44127	0.722732	0.408866	0.990724	0.866082	0	complement(2439791..2440519)	0.762352	0.254179	1.19266	0.731408	0.948208	1
CCNA_02293	17.3282	224.239	267.576	120.568	18.6733	123.186	28.2524	347.712	283.935	353.183	complement(2440516..2441148)	227.254	-0.847581	-1.79948	0.179595	0.727631	1
CCNA_02294	7.72993	89.6014	191.514	54.8651	8.32994	60.274	28.9871	130.934	112.422	188.801	2441149..2442567	104.284	-0.579178	-1.494	0.360609	0.809098	1
CCNA_02295	24.0118	60.3872	32.8179	55.556	13.0926	61.8239	47.3558	37.1244	38.0267	63.315	2442546..2442866	49.5292	-0.458691	-1.37429	0.192241	0.727631	1
CCNA_02296	7.49329	15.6407	13.1318	18.782	4.97954	16.9242	16.2452	11.2671	14.629	14.5944	2442876..2444141	14.732	-0.337984	-1.26399	0.312336	0.790776	1
CCNA_02297	1.52811	2.50693	2.5454	0.988442	4.06192	3.31935	0	5.58431	0.361612	3.49211	complement(2444280..2444861)	2.55148	-0.250369	-1.18951	0.690443	0.93593	1
CCNA_02298	4.63208	2.60542	2.22899	3.79521	6.01954	3.29295	3.41531	2.06891	4.38454	1.73217	complement(2444803..2445762)	3.85625	0.266842	1.20317	0.472506	0.862187	1
CCNA_02301	0.959396	3.03544	4.26155	5.58518	3.40027	1.4209	2.41151	3.79818	5.1082	3.88663	2447415..2448032	3.44837	0.0272511	1.01907	0.953005	0.998993	1
CCNA_02302	5.00343	8.79466	8.33429	6.20313	9.23597	5.92823	7.12669	6.09483	6.21606	5.71705	2448029..2448739	7.5143	0.245622	1.1856	0.469497	0.858119	1
CCNA_02303	416.989	64.1333	68.4336	79.7235	256.417	81.3788	91.7118	67.7925	78.6327	74.7856	complement(2448736..2449281)	177.139	1.03942	2.05539	0.0167304	0.371511	1
CCNA_02304	3.46729	6.704	9.14457	7.47594	1.7921	6.33341	7.55326	6.68739	9.84599	8.28379	2449310..2450335	7.74077	-0.457254	-1.37293	0.215585	0.741039	1
CCNA_02305	0	2.34195	3.28794	3.35157	0.983786	3.28883	3.72114	2.02876	2.10195	2.99868	2450438..2451238	2.82787	-0.419172	-1.33716	0.398791	0.8325	1
CCNA_02306	5.54859	18.0196	17.7512	14.8689	6.08685	22.3834	13.2827	15.6099	23.4467	20.0903	2451284..2452405	18.9626	-0.638697	-1.55692	0.0769067	0.604673	1
CCNA_02307	5.3671	6.65921	2.80473	6.73909	2.23788	4.86285	10.1576	3.07663	4.25847	2.95151	2452412..2453350	5.06142	-0.121542	-1.0879	0.758911	0.954365	1
CCNA_02308	10.4019	6.82589	11.166	7.62545	10.4454	11.7083	8.36669	10.559	10.0921	10.8049	complement(2453477..2454331)	10.3062	-0.243391	-1.18377	0.389473	0.830374	1
CCNA_02309	18.5283	8.68472	10.2876	16.5505	3.12703	4.18152	7.09674	6.44855	10.0218	10.9979	2454519..2454854	11.4357	0.465173	1.38048	0.244546	0.765054	1
CCNA_02310	5.20924	10.2108	7.71299	7.45384	6.0143	7.10725	5.87238	8.74916	8.51694	9.0513	2455008..2456885	7.8594	-0.163419	-1.11994	0.579373	0.90397	1
CCNA_02311	64.7125	223.19	231.123	229.091	84.4576	137.805	152.109	165.646	176.313	138.982	2457093..2457431	166.515	0.0607312	1.04299	0.874505	0.99177	1
CCNA_02312	14.9724	18.7146	19.5823	14.8499	14.7402	14.9803	13.7156	12.5642	11.3378	22.1883	complement(2457494..2458384)	16.5719	0.092691	1.06636	0.75496	0.953285	1
CCNA_02313	7.57708	23.5292	23.8402	28.1817	27.9735	33.2918	33.0123	23.6516	32.0506	28.1377	complement(2458478..2459416)	30.0288	-0.475092	-1.39001	0.142963	0.701621	1
CCNA_02314	5.27028	4.01427	3.90168	4.82945	10.896	5.20367	7.94835	1.87247	1.24716	3.55843	complement(2459534..2460208)	5.78233	0.504583	1.41871	0.234145	0.75798	1
CCNA_02315	200.676	69.4778	37.9851	67.8527	284.223	72.0508	77.955	62.9643	56.1221	48.323	complement(2460236..2460430)	132.043	0.950284	1.93225	0.0223551	0.413215	1
CCNA_02316	2.29809	5.65517	7.97492	10.0338	3.56337	4.08427	7.50934	4.54898	5.30224	8.23563	complement(2460427..2460942)	5.93609	0.009142	1.00636	0.981365	0.998993	1
CCNA_02317	9.47568	9.5175	12.0257	9.63167	14.3929	7.21742	8.16612	11.9549	6.72697	10.1241	complement(2460852..2461289)	11.0087	0.231419	1.17399	0.496298	0.878033	1
CCNA_02318	0	10.2638	7.48192	2.90542	3.97986	6.65242	16.9354	8.20725	11.9578	11.1979	complement(2461318..2461581)	10.9902	-1.08387	-2.11971	0.0287802	0.445543	1
CCNA_02319	116.525	20.8835	26.0065	28.4496	73.892	31.1318	66.6191	26.4403	27.5745	30.6161	complement(2461698..2462216)	53.1513	0.430028	1.34726	0.271849	0.779053	1
CCNA_02320	4.33411	1.62521	3.04819	4.85936	3.5842	3.93699	2.03357	1.93582	3.48712	4.1419	complement(2462335..2463360)	3.49022	0.0493405	1.03479	0.893163	0.99606	1
CCNA_02321	8.75601	8.61876	4.86167	8.57651	4.65493	11.4118	8.30049	7.77091	7.28167	10.2907	2463535..2464719	9.01112	-0.437204	-1.35398	0.170419	0.719432	1
CCNA_02322	4.46274	4.03419	3.89382	3.29906	2.82442	2.6438	3.20498	1.1649	1.81039	6.35749	2464700..2465164	3.70285	0.218281	1.16335	0.667034	0.927415	1
CCNA_02325	17.1031	13.3611	12.31	10.2435	11.7865	14.8229	10.1902	12.153	12.1418	10.8569	complement(2466949..2467884)	12.9608	-0.007919	-1.0055	0.977212	0.998993	1
CCNA_02326	18.2545	10.781	12.433	11.3354	11.2142	11.9678	8.32032	10.377	10.3674	13.1975	complement(2468002..2469219)	12.8036	0.117968	1.0852	0.6711	0.927593	1
CCNA_02327	200.521	68.4635	51.4633	67.4185	191.731	92.7259	147.944	43.7121	52.7425	45.1796	complement(2469374..2470195)	115.919	0.513051	1.42706	0.240819	0.761413	1
CCNA_02329	1.36704	1.92231	1.73494	1.26323	0.865187	1.15694	0.392705	1.90313	1.52506	1.70402	2471231..2472748	1.43054	-0.001713	-1.00119	0.996808	0.998993	1
CCNA_02330	6.86235	3.85988	3.81024	1.77553	3.64821	3.25229	0	0.835924	0.974343	0	2472776..2472991	3.99124	1.59227	3.01524	0.0412482	0.504488	1
CCNA_02331	4.1754	3.18032	3.67071	4.72642	0.924898	3.71036	4.19807	2.75502	2.71718	4.98778	2472976..2473827	3.67368	-0.154945	-1.11338	0.681439	0.93414	1
CCNA_02332	9.71042	34.9397	46.6215	46.5539	20.7505	54.4806	51.113	32.7025	51.4994	40.2281	2473963..2474481	46.0047	-0.563093	-1.47743	0.120697	0.676136	1
CCNA_02333	5.64673	13.4544	7.48984	13.3926	11.6743	12.2658	16.7168	11.082	7.57203	8.79831	complement(2474478..2475422)	11.287	-0.170754	-1.12565	0.60563	0.914264	1
CCNA_02335	3.89604	3.98439	2.16323	4.81113	5.96266	2.72773	3.56109	1.51006	1.00577	2.20746	2475998..2476834	4.16349	0.847977	1.79998	0.0414548	0.50473	1
CCNA_02336	4.23073	2.97458	3.69139	5.66868	7.76499	6.98198	6.68439	5.33764	4.93429	5.27361	complement(2476809..2477789)	5.84238	-0.355052	-1.27903	0.268886	0.779053	1
CCNA_02337	199.554	40.4725	17.0462	39.7168	73.1058	45.4689	58.841	23.9577	19.0706	34.0828	complement(2477793..2478101)	73.9791	0.898035	1.86353	0.0401682	0.495731	1
CCNA_02338	2.62348	7.6856	7.52606	4.52526	5.03646	4.66258	3.95659	4.5273	6.2082	4.90525	complement(2478190..2478867)	5.47937	0.157389	1.11527	0.674002	0.928775	1
CCNA_02339	3.30494	6.97101	8.80815	10.9026	6.14949	8.22319	1.66144	5.23361	9.38497	9.88707	complement(2478864..2479760)	7.22724	0.0137509	1.00958	0.97219	0.998993	1
CCNA_02340	17.5832	2.22527	2.92887	4.09447	7.78977	4.79163	4.59647	3.42699	2.99584	2.19175	complement(2479805..2480647)	6.92432	0.790019	1.7291	0.0727976	0.599932	1
CCNA_02341	87.1922	27.7003	38.3713	43.4484	43.4924	34.0534	31.17	25.9628	28.8864	25.3598	2480879..2481337	48.0409	0.612028	1.52841	0.0516585	0.538329	1
CCNA_02342	4.44914	3.29279	3.38046	5.45283	2.28229	1.66468	1.8835	3.28031	2.82606	3.3567	complement(2481416..2482681)	3.7715	0.44258	1.35903	0.198232	0.729152	1
CCNA_02343	2.11752	11.0834	9.53648	17.5017	3.3355	12.8233	11.1182	9.88778	16.703	12.9042	complement(2482784..2484043)	12.6873	-0.588161	-1.50333	0.135703	0.699217	1
CCNA_02344	14.1168	7.59001	6.22446	6.44564	9.19716	7.62512	4.17455	4.04615	9.43229	7.50444	complement(2484136..2484849)	8.71482	0.269974	1.20579	0.420116	0.841024	1
CCNA_02345	0	0	0.762048	4.43884	0	4.06537	0	0	3.89737	0.855391	2485010..2485225	1.76363	-0.701634	-1.62635	0.507285	0.881341	1
CCNA_02346	6.50525	9.36534	6.70793	7.41383	10.1555	9.72629	4.67184	6.22619	10.1161	6.95039	2485222..2486178	8.02957	-0.003233	-1.00224	0.991785	0.998993	1
CCNA_02347	32.4772	7.51864	9.45611	12.2971	16.1428	10.0893	8.5616	8.32238	8.43519	8.26935	2486278..2487774	15.5784	0.706147	1.63144	0.0357991	0.477291	1
CCNA_02348	14.2135	4.75875	1.12741	3.06462	15.5923	1.2029	2.04153	2.88565	2.88299	2.53102	2487854..2488291	7.75133	1.56744	2.96379	0.007738	0.274866	1
CCNA_02349	6.58785	3.70548	3.47494	2.34371	4.37785	4.6833	3.97418	1.40435	1.6369	2.66882	2488425..2489324	4.09797	0.417681	1.33578	0.286735	0.781233	1
CCNA_02350	5.94393	20.8956	9.90089	12.9761	7.89988	14.5253	13.4465	9.50313	8.96688	8.33524	2489366..2489764	11.5233	0.0512032	1.03613	0.891699	0.99606	1
CCNA_02351	54.1145	69.4778	47.0292	61.1799	78.8013	68.2981	49.2041	63.9123	75.1636	43.1117	complement(2489936..2490565)	62.1205	-0.030791	-1.02157	0.926925	0.998993	1
CCNA_02352	30.2587	4.79157	4.99483	6.25968	4.83073	6.62122	5.7557	5.47905	4.45107	6.37119	complement(2490617..2492791)	10.2271	0.681163	1.60343	0.0925728	0.633173	1
CCNA_02353	20.4011	31.3771	32.5665	29.6915	27.6793	29.0818	26.2808	33.3938	44.3546	42.5157	complement(2492794..2493258)	35.1253	-0.366526	-1.28924	0.213526	0.738106	1
CCNA_02354	3.15376	8.13038	15.1761	9.85988	8.38311	11.21	13.212	5.4424	10.0751	8.84511	2493653..2494216	9.75693	-0.112155	-1.08084	0.754015	0.953285	1
CCNA_02355	6.12507	6.89036	2.7207	3.43368	9.40695	3.14478	4.51611	3.48186	1.44944	2.29047	2494298..2495023	5.71535	0.849019	1.80128	0.039014	0.493685	1
CCNA_02356	5.81281	3.01142	1.52881	4.35363	1.35537	1.44994	2.46079	0.745344	1.73753	1.90675	complement(2495393..2496361)	3.21241	0.866608	1.82337	0.0533195	0.53989	1
CCNA_02357	15.8425	13.7842	12.4249	14.4747	5.96581	16.1898	10.5527	10.7347	10.2628	12.4657	complement(2496500..2497996)	12.4984	-0.0223188	-1.01559	0.942399	0.998993	1
CCNA_02358	4.51738	0	2.82175	1.82626	3.50228	2.00713	0	2.40746	3.20698	2.11159	complement(2498072..2498596)	2.53354	0.183932	1.13598	0.758472	0.954365	1
CCNA_02359	16.3264	18.9302	17.9711	24.2708	15.9887	23.0771	19.5829	14.4796	19.7241	13.0317	complement(2498636..2499670)	18.6974	0.003814	1.00265	0.989987	0.998993	1
CCNA_02360	6.43764	4.75255	2.5021	5.82977	5.98924	2.47895	2.91267	4.50909	3.42765	3.41042	complement(2499556..2500476)	5.10226	0.464522	1.37986	0.189985	0.727631	1
CCNA_02361	3.86007	3.79957	3.14345	3.99495	2.96417	5.03089	3.6223	3.60492	5.1153	2.56617	complement(2500476..2501627)	3.98792	-0.236638	-1.17824	0.473152	0.862484	1
CCNA_02362	1.79669	1.68431	4.65542	3.87389	4.24519	3.90275	3.01074	1.0943	4.25168	3.73262	complement(2501722..2502216)	3.2511	0.0212265	1.01482	0.96599	0.998993	1
CCNA_02363	32.3404	30.3176	21.4482	26.7299	37.4107	19.159	19.8709	26.8103	20.408	25.7551	2502410..2502739	29.6493	0.282508	1.21631	0.328458	0.794141	1
CCNA_02364	9.22468	9.32886	10.1736	13.3233	10.4128	12.1275	9.52888	8.23524	11.7519	7.32443	complement(2502736..2505081)	10.4927	0.0356112	1.02499	0.892977	0.99606	1
CCNA_02365	6.01611	5.48982	4.40645	3.97425	4.3098	4.54984	4.50441	3.50828	7.08796	5.82375	complement(2505205..2507520)	5.09485	-0.155428	-1.11375	0.585127	0.90397	1
CCNA_02367	10.889	7.65595	2.87185	7.74779	7.47732	9.83751	8.75852	4.14508	9.46964	7.12591	2509312..2510400	7.86733	-0.204269	-1.1521	0.53134	0.881341	1
CCNA_02368	10.0982	3.54996	2.40295	3.26595	6.23124	4.91405	3.98868	3.29488	2.68833	2.92207	complement(2510397..2512040)	5.10965	0.388193	1.30875	0.291732	0.782733	1
CCNA_02369	11.5968	23.7717	22.6725	21.3416	19.6822	17.6108	22.3342	24.0746	19.4804	21.1741	complement(2512016..2513830)	20.9348	-0.134496	-1.09771	0.69362	0.937005	1
CCNA_02371	19.1765	8.8051	7.27944	11.3915	20.979	10.0853	13.9686	7.98514	7.50147	10.6102	2517092..2518606	13.5263	0.338008	1.26401	0.297438	0.784317	1
CCNA_02372	84.4069	24.6067	20.5753	23.9697	93.0293	31.7098	33.1181	25.0777	26.3072	29.511	complement(2518633..2518776)	49.3176	0.634485	1.55238	0.110255	0.661366	1
CCNA_02373	20.4671	15.2896	17.934	24.823	26.0687	23.3028	20.2567	17.3353	16.3463	19.3335	complement(2518748..2519674)	20.9165	0.0332452	1.02331	0.91189	0.998993	1
CCNA_02374	7.77219	4.6839	5.54839	5.74555	1.96757	5.26214	2.23268	4.05752	3.15293	10.38	complement(2519668..2519934)	5.14352	-0.0941502	-1.06744	0.855304	0.987462	1
CCNA_02375	26.9503	21.317	16.2108	19.6116	41.7886	17.9615	30.4837	15.0466	8.76908	16.7968	complement(2519993..2520256)	25.1757	0.433411	1.35042	0.202703	0.731855	1
CCNA_02376	40.3772	108.326	88.4959	103.096	45.1907	129.672	80.1245	76.3657	85.9936	72.184	2520245..2520523	88.868	-0.246605	-1.18641	0.438979	0.847876	1
CCNA_02377	904.941	281.371	230.853	334.714	768.394	295.135	402.777	263.472	249.464	311.008	complement(2520520..2521242)	504.055	0.62231	1.53934	0.156488	0.715952	1
CCNA_02378	0.793717	3.90638	5.50878	4.36396	1.75817	4.93721	3.19211	6.76796	4.22606	5.19418	2521693..2522439	4.86351	-0.576764	-1.4915	0.155477	0.715952	1
CCNA_02379	3.08806	23.883	14.4027	18.3768	9.30293	21.2212	7.45158	18.4321	19.7304	19.6312	complement(2522509..2522988)	17.2933	-0.367811	-1.29039	0.343951	0.803495	1
CCNA_02380	9.96482	8.7577	4.61071	12.3541	5.88618	10.8228	2.50473	7.58653	3.53711	5.17548	complement(2522992..2523348)	8.31471	0.336191	1.26242	0.433806	0.846869	1
CCNA_02381	0	1.2807	3.28699	3.53471	2.01744	2.1582	3.20498	1.9415	1.29314	2.27053	2523526..2524176	2.17367	-0.0170002	-1.01185	0.975017	0.998993	1
CCNA_02382	22.8041	23.0043	19.8183	17.9572	24.5979	29.7601	23.9248	21.337	27.9203	22.2459	2524178..2525074	25.0376	-0.29442	-1.22639	0.307601	0.789289	1
CCNA_02383	4.08901	7.66651	7.56792	7.71439	5.43457	6.66159	5.82422	3.52817	3.62859	4.88458	complement(2525071..2525940)	6.49448	0.396636	1.31643	0.244357	0.765054	1
CCNA_02384	11.7522	9.0775	6.70908	10.0643	7.6264	10.1981	8.98683	7.76275	7.28554	9.18149	complement(2526023..2527813)	9.0459	-0.0423649	-1.0298	0.880153	0.992477	1
CCNA_02385	42.9643	12.5362	13.1205	13.3397	10.4688	13.8717	9.50346	8.89713	8.23531	13.6565	complement(2528009..2529388)	18.4859	0.649241	1.56834	0.0671421	0.586216	1
CCNA_02386	18.4072	18.5615	13.1789	18.9564	19.0994	21.2356	22.8905	15.1941	18.054	16.6047	complement(2529502..2530725)	18.7958	-0.159281	-1.11673	0.561179	0.898314	1
CCNA_02387	8.25245	15.6213	10.9265	15.0559	11.0618	19.3048	17.4455	12.1146	14.1207	10.0229	complement(2530722..2532122)	14.6017	-0.307046	-1.23717	0.333354	0.794141	1
CCNA_02388	22.104	81.3621	66.1778	81.0205	44.5465	106.555	80.6165	70.4816	75.0757	62.6687	complement(2532165..2532848)	79.0796	-0.463606	-1.37898	0.219267	0.741695	1
CCNA_02389	8.53717	3.30132	4.85867	2.76109	3.59305	4.5518	5.36471	4.67973	4.39401	5.45381	complement(2532845..2534233)	4.88881	-0.19406	-1.14398	0.564738	0.899047	1
CCNA_02390	4.56721	1.75154	1.38321	0.805705	2.20732	2.95166	2.92219	1.26442	0.884277	4.14038	2534303..2535016	2.43259	-0.332328	-1.25904	0.535884	0.882162	1
CCNA_02391	0	1.06889	0.422057	1.7209	1.34703	0.675476	2.29279	1.62041	2.69818	2.1319	2535329..2536108	1.88375	-1.01395	-2.01944	0.0793088	0.605414	1
CCNA_02392	16.8526	10.7717	13.6105	12.3875	24.4345	18.1523	16.9442	8.39812	22.2966	10.026	2536118..2536504	15.6114	-0.0344137	-1.02414	0.921896	0.998993	1
CCNA_02394	4.02425	13.8327	20.8546	21.9813	6.33897	19.8669	22.4784	17.4296	21.268	15.0487	complement(2537390..2538052)	19.2183	-0.545263	-1.45929	0.141243	0.699217	1
CCNA_02395	7.18675	7.57939	12.4699	5.81084	4.77583	3.72535	12.6451	3.2829	3.82651	6.15882	complement(2538160..2538489)	7.56454	0.410087	1.32877	0.367357	0.812531	1
CCNA_02396	29.686	6.57609	5.87059	4.9978	15.4936	6.74549	11.4482	3.9629	6.63996	5.82933	complement(2538661..2539389)	12.5248	0.737826	1.66766	0.080995	0.611579	1
CCNA_02397	4.52915	1.73694	0.228614	1.33165	1.09446	1.46353	0	1.25389	1.16921	1.79632	2539482..2540201	1.78416	0.371879	1.29404	0.550588	0.891106	1
CCNA_02398	28.8715	10.045	11.7337	12.7068	27.6912	14.1063	17.9556	11.4209	14.3686	11.3159	complement(2540198..2541193)	18.2096	0.294865	1.22677	0.369333	0.813767	1
CCNA_02399	0	2.58282	4.07936	4.03951	0.325491	2.39388	2.95478	1.11871	3.39028	2.74743	complement(2541255..2542061)	2.52101	-0.156966	-1.11494	0.778888	0.963277	1
CCNA_02400	44.81	20.5614	24.2255	25.0185	36.3602	31.2965	29.8775	15.2262	26.7886	23.5182	complement(2542088..2543344)	30.1951	0.168593	1.12396	0.603655	0.914153	1
CCNA_02401	3.65992	9.30329	9.69168	10.9264	4.4901	12.1752	7.92571	8.23063	4.5969	11.4052	2543511..2544563	8.86674	-0.251084	-1.1901	0.475042	0.864783	1
CCNA_02402	4.22134	8.36432	5.85963	6.82633	1.53012	4.54689	3.47258	6.77828	7.35581	8.01244	complement(2544607..2546151)	6.0332	-0.236839	-1.17841	0.532926	0.881341	1
CCNA_02403	24.7044	20.7313	15.4868	15.2925	15.5343	20.1432	22.4349	18.4442	16.9724	17.0526	2546366..2547481	19.0095	-0.134016	-1.09734	0.640285	0.922711	1
CCNA_02404	7.08371	4.23341	4.32646	3.43652	5.02119	2.5179	1.78054	4.31444	2.51443	3.09045	2547478..2548314	4.82026	0.582255	1.49719	0.102635	0.652481	1
CCNA_02405	8.52422	5.1054	4.90827	5.30959	5.59469	5.04988	4.76139	3.4612	2.68956	3.14828	2548314..2549252	5.88843	0.517458	1.43143	0.121199	0.676136	1
CCNA_02406	5.91996	10.5657	13.4008	8.24765	4.03488	11.0608	12.8199	9.98486	17.1341	9.36594	2549249..2549899	12.0731	-0.530401	-1.44433	0.134499	0.699217	1
CCNA_02407	13.1757	17.71	20.656	23.3117	26.4388	18.5955	13.6369	18.174	18.4323	19.5633	complement(2549896..2550660)	20.2584	0.124748	1.09032	0.657322	0.925741	1
CCNA_02408	3.3985	7.90356	6.09638	7.60943	5.32754	4.18152	7.09674	6.52816	5.75326	8.96124	complement(2550731..2551864)	6.50419	-0.136462	-1.09921	0.694531	0.937594	1
CCNA_02409	17.3509	37.6435	37.2511	39.1211	20.7911	42.878	28.9091	28.9861	39.8861	47.2725	2552018..2553811	37.5864	-0.350969	-1.27542	0.319786	0.79382	1
CCNA_02410	2.73802	5.60022	5.11359	9.17732	4.19038	4.57123	6.50684	4.24489	4.06426	5.73996	2553957..2555147	5.36391	0.0740368	1.05266	0.832164	0.983012	1
[truncated: 2,086 more rows]
