# Supplementary material for: Gene network analysis identifies a central post-transcriptional regulator of cellular stress survival
Source: eLife journal article supplement (doi:10.7554/elife.33684), 2018-03-14
Supplement: supp [file elife-33684-supp-v1.zip › elife_poa_e33684_Figure_8_source_data_3.xlsx]

## Sheet: MQ_delta_oe_test.csv
Name	Significance	Pvalue	Mean1	Mean2	Log2Fold
CCNA_01923		0.441844	3714717000	3528417000	0.0742312
CCNA_02190		0.397073	257465000	231115000	0.155765
CCNA_01927		0.514869	167316700	174200000	-0.0581632
edd		0.717286	2366800000	2294867000	0.0445273
CCNA_01925		0.251599	770718300	678681700	0.183469
CCNA_02198		0.886657	1242682000	1222867000	0.0231897
CCNA_02203		0.706399	1341233000	1260010000	0.0901247
CCNA_02207		0.998762	3765983000	3766533000	-0.000210682
phoH		0.446477	854718300	919065000	-0.104718
CCNA_02754		0.141184	1451200000	1223600000	0.246114
fljM		0.839999	13622000000	13961830000	-0.0355495
CCNA_02756		0.779809	660353300	631333300	0.0648362
CCNA_01446		0.679186	1839917000	1921250000	-0.0624046
CCNA_02619		0.896012	5107517000	5040900000	0.0189408
CCNA_02753		0.575647	293708400	279386000	0.0721248
CCNA_01367		0.08277	177460000	123483200	0.523179
CCNA_03228		0.691807	227881700	239386700	-0.0710579
CCNA_00220		0.8404	529620000	551690000	-0.0589002
CCNA_03347		0.466874	199301100	265085000	-0.411505
CCNA_01368		0.870784	3970067000	4030183000	-0.021682
CCNA_01369		0.764942	2156267000	2225200000	-0.0453992
CCNA_00224		0.24003	656961700	552768300	0.249134
ileS		0.9971	6261200000	6259433000	0.000407207
CCNA_01956		0.397865	680623400	601925000	0.177273
CCNA_01955		0.0399137	673591700	469920000	0.519459
CCNA_02662		0.87112	2330433000	2301317000	0.0181383
CCNA_01818		0.411351	1095623000	1004085000	0.12587
CCNA_01817		0.730578	1058632000	1037678000	0.0288423
CCNA_01815		0.0889248	879038300	733015000	0.262083
katG	*	9.36973e-06	868633300	2274100000	-1.38848
ftsZ		0.490654	5869750000	5299950000	0.14732
CCNA_01089		0.756575	488710000	478276700	0.0311331
ccoP		0.105402	360871700	537035000	-0.57353
CCNA_01084		0.0817586	244965000	213488300	0.198419
CCNA_01087		0.265629	1543733000	1365367000	0.177134
CCNA_01083		0.117171	1252797000	1051885000	0.252176
CCNA_03810		0.784619	290008800	311735000	-0.104223
CCNA_00764		0.863581	13819000000	13593830000	0.0237012
CCNA_00763		0.481397	12231300000	10428620000	0.230029
CCNA_03816		0.658036	4488916000	4281433000	0.0682734
ccoO		0.0374356	632960000	923070000	-0.544326
atpA		0.973102	91558330000	91324830000	0.00368399
acnA		0.637391	34549500000	33282170000	0.0539153
atpG		0.82705	11943370000	11764500000	0.02177
atpF		0.525215	2004433000	1858233000	0.109263
atpD		0.471499	105147000000	99209670000	0.0838509
hemH		0.45372	853180000	923490000	-0.114246
glmU		0.855367	2254267000	2224317000	0.019296
glmS		0.857573	1689950000	1652717000	0.0321409
CCNA_00167		0.191426	499571600	579500000	-0.214117
CCNA_02614		0.500512	1430383000	1538733000	-0.105341
hemC		0.647143	420400000	428911700	-0.028918
CCNA_02293		0.987696	624150000	622675000	0.00341343
hemF		0.0512935	200760000	228400000	-0.186091
stpX		0.280309	1243378000	1045560000	0.249989
hemE		0.951283	1486333000	1492617000	-0.00608665
CCNA_00601		0.304665	1990183000	1793083000	0.150459
glmM		0.556568	2247567000	2154750000	0.0608436
CCNA_03774		0.368168	2636533000	2409567000	0.129868
CCNA_03322		0.394511	71722000000	66627670000	0.106294
CCNA_03323		0.689529	44695670000	43037500000	0.0545408
acpP		0.316686	1010428000	881603300	0.196765
CCNA_03777		0.54156	1777250000	1675767000	0.0848251
tipN		0.596696	1032725000	1000555000	0.0456557
CCNA_03752		0.974	5544850000	5532450000	0.00322992
CCNA_03751		0.564462	381863300	362111700	0.0766215
CCNA_03750		0.578351	2930467000	2819333000	0.0557767
CCNA_03284		0.656687	659860000	686321700	-0.056725
CCNA_03281		0.727895	1697750000	1762050000	-0.0536308
CCNA_01444		0.978628	1204982000	1202060000	0.00350269
CCNA_01030		0.352483	184976700	236277500	-0.353139
tolB		0.348717	2954867000	3162617000	-0.0980257
tolA		0.236373	155245000	173058000	-0.156709
CCNA_01034		0.0124979	1198520000	752998300	0.670535
CCNA_01447		0.208647	6409517000	5786300000	0.147575
CCNA_01036		0.139218	148838300	118884200	0.324189
chvG		0.560638	414675000	439285000	-0.0831762
CCNA_00909		0.662492	173296000	185210000	-0.0959236
kup		0.470302	750005000	697376600	0.104962
folE		0.716099	476698300	505815000	-0.0855333
folD		0.726602	1607417000	1655550000	-0.0425663
cheD		0.3474	183793300	208051700	-0.178858
trmB		0.453417	84773250	93424170	-0.140187
CCNA_03353		0.489111	261405000	280970000	-0.104129
CCNA_03352		0.606728	1218037000	1139567000	0.0960722
CCNA_01546		0.434435	296371700	276140000	0.102008
fljK		0.681174	2700333000	2411033000	0.163486
trmL		0.971538	115016800	115791700	-0.00968724
CCNA_03358		0.541642	36749830000	34912500000	0.0739939
CCNA_02405		0.204943	489490000	528701700	-0.111175
cysI		0.239016	8420583000	7326783000	0.20074
cysH		0.522869	277835000	224847500	0.305282
clpX		0.917339	8580917000	8646134000	-0.0109234
CCNA_03137		0.452691	158775000	176728000	-0.154547
cysD		0.456145	2017633000	1881383000	0.10087
CCNA_00290		0.705592	11793150000	12136170000	-0.0413641
cysA		0.3169	1747200000	1630183000	0.100011
CCNA_03524		0.590179	330300000	301415000	0.132026
rpoB		0.539792	75895830000	72008660000	0.0758502
rpoA		0.919376	37482830000	37197000000	0.0110436
CCNA_02964		0.97602	1320833000	1317100000	0.00408318
CCNA_03032		0.364777	820098300	883585000	-0.107572
CCNA_00869		0.782929	377926700	363063300	0.0578853
CCNA_02961		0.362749	781033300	728153300	0.101142
rpoD		0.879068	8615517000	8511833000	0.0174675
ispG		0.519442	1403317000	1335217000	0.0717667
rpoH		0.537392	448656700	479395000	-0.0956029
CCNA_01964		0.332781	869148300	982640000	-0.177061
cysS		0.760928	1908350000	1961483000	-0.039619
gltX		0.568596	4888016000	4705550000	0.0548856
glk		0.772849	770476700	799720000	-0.0537436
CCNA_01108		0.76082	169203300	164186700	0.0434204
CCNA_01109		0.920324	2764033000	2785983000	-0.0114116
ribH		0.947037	1293515000	1278245000	0.0171324
lepA		0.877709	2667950000	2708183000	-0.0215936
CCNA_00545		0.922538	6044266000	5941217000	0.0248087
CCNA_00544		0.458973	31109330000	28449830000	0.128927
CCNA_01100	*	0.000118214	873306700	350206700	1.31828
CCNA_01103		0.913431	583941600	589630000	-0.0139858
gpsA		0.264836	933225000	864728300	0.109978
CCNA_02716		0.730613	336498300	351388300	-0.0624669
CCNA_01960		0.684249	2262533000	2391950000	-0.0802484
valS		0.619835	7448817000	7197083000	0.049599
CCNA_02539		0.645085	303115000	321758300	-0.0861121
gltB		0.892558	21099830000	20828170000	0.0186953
qor		0.504123	511870000	547038300	-0.0958644
CCNA_01285		0.401226	81853760	115904000	-0.50181
CCNA_02720		0.510255	91693540	108935700	-0.248585
rpsG		0.215124	12018920000	13432170000	-0.160385
rpsF		0.452348	12205900000	13030500000	-0.0943138
CCNA_01843		0.0721274	1135137000	388475000	1.54697
fbp		0.46145	980580000	1050012000	-0.0986986
rpsC		0.705092	34660670000	33315330000	0.0571134
rpsB		0.733193	30020670000	29268330000	0.0366157
CCNA_03240		0.796283	209871700	203555000	0.044089
rpsO		0.382461	2627367000	2381717000	0.141616
rpsN		0.836255	2963800000	3020533000	-0.0273551
CCNA_02244		0.841221	652105000	667913300	-0.0345566
CCNA_01183		0.84533	2530683000	2484850000	0.026368
astD		0.0723242	392218300	340017500	0.206048
purQ		0.824366	785453300	798085000	-0.0230169
CCNA_02240		0.556041	310336700	279957500	0.148626
CCNA_02241		0.860667	513271700	533558300	-0.0559232
CCNA_02321		0.82327	2493100000	2531967000	-0.0223179
CCNA_02320		0.557915	835651600	750496700	0.155056
rpsU		0.832176	1034875000	1074453000	-0.0541459
rpsT		0.451264	1216612000	1112080000	0.129609
CCNA_03627		0.630712	1259833000	1217117000	0.0497646
rpsR		0.619422	2567767000	2744760000	-0.0961657
rpsQ		0.533064	8427567000	8903033000	-0.0791807
rpsP		0.182049	10742200000	12183830000	-0.181678
CCNA_01242		0.368839	969101600	1053012000	-0.119802
CCNA_01240		0.582115	122180000	135819800	-0.152686
CCNA_03146		0.0433638	569446700	499288300	0.189688
thrS		0.432531	7062483000	6634734000	0.0901369
CCNA_01245		0.489149	323650000	338078000	-0.0629216
CCNA_02087		0.705405	1870183000	1812117000	0.0455033
CCNA_02912		0.44278	244516700	277250000	-0.181254
CCNA_00267		0.377395	840218400	783090000	0.101586
CCNA_00264		0.343062	275490000	260551700	0.0804303
CCNA_03970		0.195573	2412123	4847800	-1.00703
CCNA_00262		0.766041	169278300	166516700	0.0237302
purU		0.849621	1126790000	1151998000	-0.0319195
CCNA_02914		0.477557	1735400000	1633483000	0.0873168
CCNA_00261		0.845393	934660000	916053400	0.02901
rsaD		0.813522	1613633000	1657450000	-0.0386529
rsaE		0.222406	3465017000	3718200000	-0.101742
rsaA		0.13933	111883000000	94129500000	0.249269
CCNA_02725		0.408494	459581700	487930000	-0.0863528
CCNA_00539		0.967581	1937650000	1945117000	-0.00554894
ybgF		0.526819	618121700	560348400	0.141567
CCNA_00439		0.519748	3402783000	3058950000	0.153679
CCNA_00534		0.565222	363768300	337705000	0.107256
tpiA		0.51025	404393300	376658300	0.102503
phoR		0.267199	303352500	334306700	-0.140177
CCNA_01604		0.252641	2287483000	2055683000	0.154143
CCNA_00358		0.593989	717628400	678203300	0.0815192
CCNA_01562		0.42598	8234817000	9063083000	-0.138265
CCNA_00210		0.369518	46271330000	41658670000	0.151502
CCNA_02669		0.583325	2021900000	2116083000	-0.0656846
thiL		0.397256	459643300	421884000	0.123668
thiC		0.426135	8170600000	7597433000	0.10493
CCNA_00124		0.281133	2234967000	2635483000	-0.237814
cckA		0.198273	626880000	546698300	0.197444
dksA		0.472363	743636700	796801700	-0.0996228
thiG		0.612942	1521250000	1477383000	0.0422134
CCNA_02661		0.911196	38426170000	38773000000	-0.0129632
thiE		0.237725	296105000	260390000	0.185435
CCNA_01430		0.653759	224975000	213551700	0.0751793
CCNA_01252		0.733145	848648300	868928300	-0.0340703
CCNA_03371		0.89152	2051750000	2012900000	0.0275795
der		0.952241	488795000	485998300	0.00827826
corC		0.947999	194353300	192093300	0.0168744
CCNA_01439		0.936655	304361700	306651700	-0.0108141
CCNA_01650		0.745012	535931700	505658300	0.0838863
CCNA_03740		0.812287	13476330000	13763330000	-0.0304019
era		0.908038	1170200000	1177667000	-0.00917653
CCNA_01969		0.838439	8114517000	8238900000	-0.0219465
CCNA_01966		0.733774	214711700	199655000	0.104892
CCNA_03641		0.856814	4744717000	4627917000	0.035959
CCNA_02983		0.012334	153092500	125305000	0.28896
odhB		0.887305	45700830000	45209500000	0.0155944
CCNA_00088		0.381201	826793300	688715000	0.26362
def		0.399131	249386700	272353300	-0.127095
CCNA_02986		0.120675	229306700	170151000	0.430463
CCNA_03717		0.336958	736957500	673785000	0.129293
mnmG		0.503223	196295000	177602500	0.144372
CCNA_03715		0.666048	730103300	771313300	-0.0792164
mnmE		0.584967	191425000	206944000	-0.112461
CCNA_03245		0.903764	112692500	114294200	-0.0203607
CCNA_00784		0.109541	950466700	1402192000	-0.560976
CCNA_03247		0.93954	573901700	583955000	-0.0250536
CCNA_03248		0.538876	23970830000	22763000000	0.0745892
CCNA_00690		0.395463	2335200000	2588250000	-0.148431
dxs		0.824967	1960333000	1926983000	0.0247549
dxr		0.179094	182134000	163268000	0.157758
CCNA_03718		0.994927	4843450000	4840333000	0.000928745
purC		0.413492	617361700	641458300	-0.0552395
tal		0.852366	1638233000	1595067000	0.0385235
purA		0.740078	7988533000	7748150000	0.0440787
CCNA_03848		0.523661	365765000	343955000	0.0886972
purF		0.559487	3951350000	3766633000	0.0690702
purD		0.608216	1949800000	1881650000	0.0513278
purK		0.923195	1292083000	1302700000	-0.0118061
CCNA_02426		0.146623	287206700	329625000	-0.198736
purH		0.506528	13005870000	12274000000	0.0835574
CCNA_00752		0.353266	6092184000	5592183000	0.123548
gatA		0.632031	7408866000	7140733000	0.0531806
gatB		0.864052	9669250000	9788017000	-0.0176126
purL		0.865259	6078367000	5999500000	0.0188415
gcvPA		0.41076	479496700	535231700	-0.158643
CCNA_01509		0.190058	478576700	400400000	0.257308
CCNA_00055		0.627083	1441933000	1532967000	-0.0883225
CCNA_00059		0.955943	1017317000	1011087000	0.00886216
CCNA_03649		0.836085	1150430000	1174520000	-0.0298981
CCNA_00192		0.168834	190370000	218522000	-0.198972
CCNA_02357		0.27444	1578200000	1484133000	0.0886597
eno		0.66332	50561000000	52320500000	-0.0493513
fabZ		0.630526	1606733000	1659000000	-0.0461837
purM		0.730758	1673667000	1625333000	0.0422772
fixJ		0.156348	232723300	281375000	-0.273878
secA		0.939943	14654500000	14578500000	0.00750146
map		0.604078	556505000	534953300	0.0569817
CCNA_03408		0.214996	645000000	571605000	0.174281
tsaD		0.26431	143218300	115895000	0.305398
coaX		0.997889	217276700	217201700	0.000498078
CCNA_00398		0.675743	24710830000	25484170000	-0.0444579
CCNA_00399		0.0520303	346801700	402535000	-0.215003
CCNA_00397		0.724597	2358067000	2425950000	-0.0409451
CCNA_03401		0.624333	4086767000	4285716000	-0.0685763
dprA		0.232612	735418400	816586600	-0.151041
CCNA_03407		0.286538	634941700	664786700	-0.0662674
CCNA_00390		0.368343	210863300	190071700	0.149764
carB		0.487636	11933020000	11191170000	0.0925983
CCNA_00589		0.536065	809475000	889230000	-0.13557
CCNA_03761		0.462137	92531950	110483700	-0.25581
CCNA_03764		0.461876	334262800	405046700	-0.277105
CCNA_01493		0.172241	840355000	736320000	0.190666
secY		0.549709	595955000	647041700	-0.118655
CCNA_00582		0.287245	597935000	675933300	-0.176892
CCNA_03769		0.95173	542546700	548056600	-0.0145776
argB		0.700397	3066683000	2968667000	0.0468638
ilvC		0.757245	62688170000	61199000000	0.0346851
CCNA_00338		0.594566	2444233000	2259917000	0.113112
CCNA_01491		0.862502	431218300	439613300	-0.0278166
CCNA_01066		0.917952	268015000	262776000	0.0284802
groL		0.912896	138968000000	140382000000	-0.0145991
CCNA_01064		0.520927	1921950000	1839700000	0.0631003
CCNA_01069		0.211078	3160283000	2771883000	0.189187
CCNA_02933		0.559168	14517830000	13680500000	0.0857049
spoT		0.526079	427083300	395016700	0.112604
sucC		0.928879	86020330000	85458830000	0.0094481
atpH		0.691655	826270000	885746700	-0.100281
CCNA_01618		0.558142	201657500	214888300	-0.0916799
sucD		0.603082	41120500000	39209500000	0.0686546
hslU		0.125382	1039132000	870721700	0.255095
CCNA_01752		0.498287	659676700	599371600	0.138308
CCNA_00895		0.747557	378715000	409803300	-0.113819
groS		0.830261	17445000000	17787670000	-0.0280639
argG		0.257384	9873750000	9013383000	0.131529
CCNA_01759		0.843771	7515233000	7407433000	0.0208442
CCNA_00369		0.92543	187025000	189203300	-0.0167061
CCNA_03360		0.094106	19304000000	16754670000	0.204337
CCNA_00892		0.447561	1411267000	1337900000	0.0770207
ppc		0.663483	720375000	684835000	0.0729917
tonB1		0.517407	11662250000	12371000000	-0.085116
cpaB		0.420296	181023300	199613300	-0.141032
CCNA_03665		0.915383	180047500	183573300	-0.0279787
creS		0.910704	5208316000	5150583000	0.0160812
CCNA_03663		0.142195	23529330000	21164330000	0.152825
CCNA_02362		0.968932	243173300	241490000	0.0100214
CCNA_02897		0.265323	245400000	216201700	0.182757
CCNA_00006		0.93529	2449667000	2425367000	0.0143826
CCNA_02895		0.89423	28071500000	28651670000	-0.0295131
CCNA_02894		0.999683	427785000	427815000	-0.000101171
CCNA_02893		0.630474	628593300	673190000	-0.0988869
CCNA_01202		0.0708117	1939467000	1701633000	0.18874
CCNA_02891		0.867434	568276700	559731600	0.0218584
CCNA_02944		0.911574	681328300	690368300	-0.0190161
fadJ		0.688579	377780000	398040000	-0.0753671
CCNA_03063		0.25813	75316000	60226670	0.322554
uvrD		0.983883	435833300	436496700	-0.00219432
CCNA_02048		0.571793	27553330000	25442830000	0.114968
uvrB		0.0721628	96722000	77413500	0.321259
CCNA_03108		0.59403	38870330000	36308670000	0.0983553
ompW		0.00403137	1842325000	3879950000	-1.07451
cpaC		0.548272	189774000	220743300	-0.218087
flbD		0.768	905181600	876043300	0.0472051
CCNA_03050		0.601545	147580600	172692500	-0.226702
flbA		0.437143	260483300	241846700	0.107098
panC		0.0470127	792450000	581008300	0.447761
mutS		0.0973435	463821700	433023300	0.0991257
CCNA_02569		0.474966	387911700	431523300	-0.15371
CCNA_02443		0.841658	939910000	954183300	-0.0217438
CCNA_02446		0.936292	324060000	326698300	-0.011698
CCNA_02447		0.674825	1450033000	1528617000	-0.0761412
CCNA_02563		0.0836838	122854500	162720000	-0.405441
cgtA		0.492539	1282833000	1356367000	-0.0804142
pgl		0.598601	593980000	647790000	-0.125112
CCNA_02564		0.0433034	182198300	306660000	-0.75113
CCNA_00858		0.824783	1205312000	1177355000	0.0338572
CCNA_02180		0.811925	607525000	617308400	-0.0230476
CCNA_02182		0.949951	1079013000	1082890000	-0.00517445
CCNA_02185		0.556903	7740784000	8115683000	-0.0682328
CCNA_02186		0.256375	1707033000	1922950000	-0.17183
CCNA_02622		0.474112	1854583000	1742667000	0.0897979
gcvT		0.0643597	204810000	277650000	-0.438981
CCNA_00163	*	0.000222695	8048750000	12291330000	-0.610804
CCNA_02627		0.946653	6592367000	6556883000	0.00778641
CCNA_02743		0.607198	351846700	305276700	0.20483
CCNA_02213		0.359482	2142517000	1962800000	0.126393
CCNA_01378		0.934849	1570233000	1590783000	-0.0187584
CCNA_02747		0.930814	1569717000	1554717000	0.0138525
CCNA_02219		0.800943	1015407000	1048225000	-0.0458903
CCNA_01479		0.0152058	901690000	667296600	0.434303
CCNA_01376		0.752433	112540300	132195000	-0.232226
CCNA_01375		0.856207	531031700	518066700	0.0356601
CCNA_00164		0.0013515	254288000	365553300	-0.523618
CCNA_01212		0.056127	681283300	773143400	-0.182481
CCNA_01274		0.647848	473796700	450373300	0.0731468
CCNA_02658		0.930887	2696583000	2724367000	-0.0147886
CCNA_03582		0.485093	793981700	722013300	0.13708
ftsN		0.251595	811285000	974388400	-0.264288
nadA		0.222386	755411600	677575000	0.156882
nadE		0.884365	881373300	893010000	-0.0189231
ftsH		0.686918	6387133000	6194917000	0.0440835
CCNA_00199		0.309624	283898300	254070000	0.160148
glyA		0.22887	15867500000	14374330000	0.14258
CCNA_02698		0.841039	215567100	225873300	-0.0673767
CCNA_00168		0.0950198	996068400	1204893000	-0.274588
CCNA_01805		0.436722	17421000000	16541170000	0.0747662
CCNA_01804		0.876721	771966700	755726700	0.030674
CCNA_01807		0.62739	216557500	227635000	-0.0719723
CCNA_00401		0.176571	233405000	277550000	-0.249912
CCNA_01800		0.764389	20207830000	19721170000	0.0351693
ftsY		0.756879	529130000	516210000	0.0356641
ftsX		0.0428501	636825000	494175000	0.365875
dapA		0.85765	3111633000	3071983000	0.0185017
mdh		0.746685	53408830000	51896330000	0.0414458
dapB		0.568806	730986600	682393300	0.0992415
dapE		0.950053	2420750000	2435067000	-0.00850737
dapD		0.799389	6379017000	6252217000	0.0289663
rplX		0.998926	4198933000	4199933000	-0.000343545
lolD		0.893877	78776830	80697500	-0.0347526
rplV		0.984453	4200717000	4192783000	0.00272743
rplW		0.405277	5190433000	5643150000	-0.120646
rplT		0.430715	2893533000	3092133000	-0.0957703
rplU		0.290779	10430180000	11370220000	-0.124496
rplR		0.849374	2636150000	2592867000	0.0238843
rplS		0.455109	11144320000	11878450000	-0.092038
rplP		0.893519	2346467000	2390483000	-0.026812
rplQ		0.312181	5231267000	5788017000	-0.145909
CCNA_03807		0.781081	543163300	568801700	-0.0665398
rplO		0.564146	4801967000	5138950000	-0.0978481
chvI		0.562409	3441433000	3686250000	-0.0991445
secB		0.674128	4094033000	4296684000	-0.0697009
CCNA_03803		0.889432	262430000	258675000	0.020792
rplK		0.429707	2528950000	2717367000	-0.103671
CCNA_03801		0.268549	275762000	301536000	-0.128907
rplI		0.388229	16236170000	17623670000	-0.118303
rplF		0.305162	7813116000	8604917000	-0.139263
rplD		0.6268	13585000000	14281500000	-0.0721329
rplE		0.123509	10590300000	11957330000	-0.175152
rplB		0.991342	20818170000	20798500000	0.00136377
rplC		0.696222	21485830000	20790830000	0.0474382
CCNA_01983		0.974452	35568000000	35472170000	0.00389226
CCNA_00565		0.824032	1282120000	1248792000	0.0379981
CCNA_00878		0.249229	577338300	508996700	0.181761
ligA		0.856497	407460000	412871700	-0.0190351
secF		0.290916	1072738000	1183033000	-0.141193
CCNA_01387		0.522603	278568300	269308300	0.0487724
CCNA_01384		0.245029	2505300000	2746617000	-0.132672
CCNA_01382		0.633325	1356733000	1414417000	-0.0600707
CCNA_03382		0.430192	1028797000	970548400	0.0840863
CCNA_03009		0.830356	511281700	521960000	-0.0298209
metE		0.649763	103708000000	99552170000	0.0589983
metK		0.599329	34349000000	32882500000	0.0629481
smc		0.908277	272836000	269626700	0.0170706
cpaD		0.183273	479505000	333622000	0.523331
CCNA_03444		0.443112	19466500000	22083830000	-0.181997
prfA		0.550353	496293300	538698400	-0.118285
prfB		0.922482	1308267000	1319067000	-0.0118608
prfC		0.373757	1584917000	1473467000	0.105193
CCNA_03726		0.921144	531101700	536255000	-0.013931
CCNA_00392		0.801327	11120550000	10907630000	0.0278905
spdR		0.566228	401193300	437058300	-0.123528
zapA		0.531801	52831170	48806500	0.114316
CCNA_01180		0.00945271	770375000	482043300	0.676398
asd		0.195933	2364400000	2022267000	0.225501
CCNA_01026		0.885244	1351788000	1328167000	0.0254324
fzlC		0.0587319	137698300	122141700	0.172955
CCNA_01974		0.481035	293838400	354463300	-0.270613
CCNA_01020		0.670331	63742170	67467000	-0.0819339
CCNA_00700		0.899845	1542733000	1567183000	-0.0226853
CCNA_00001		0.835856	297615000	306628000	-0.0430422
guaA		0.396709	7798017000	7321133000	0.0910404
CCNA_03874		0.806965	1743017000	1687133000	0.0470129
CCNA_00106		0.253132	169554000	272280000	-0.683346
CCNA_01799		0.728367	13814830000	14222330000	-0.04194
CCNA_00708		0.0104838	308976700	234511700	0.397838
argS		0.836705	3665450000	3727783000	-0.0243276
recF		0.209854	180128300	152963300	0.235839
CCNA_01655		0.797437	4200967000	4381250000	-0.0606211
argH		0.796213	2456633000	2398933000	0.0342895
argJ		0.799565	1747000000	1691817000	0.0463061
pleD		0.367893	289938300	320278300	-0.14358
ispH		0.450302	1055252000	977335000	0.110663
CCNA_00995		0.90313	544686700	539981700	0.0125161
hfaB		0.635703	145706000	132198300	0.140357
CCNA_01492		0.140048	1106627000	1245002000	-0.169979
CCNA_03204		0.918465	417725000	421135000	-0.0117293
CCNA_03207		0.488028	478471700	446043300	0.10125
argC		0.742754	926401700	962396700	-0.0549938
argD		0.982536	16515000000	16484170000	0.00269572
CCNA_01497		0.893708	751925000	742075000	0.0190238
CCNA_03203		0.356087	187610600	244487500	-0.382019
CCNA_03202		0.936813	234093300	231670000	0.0150124
hisA		0.474546	1191643000	1271383000	-0.0934466
glyS		0.593982	7377850000	6980317000	0.0799079
glyQ		0.940952	2841050000	2862850000	-0.0110279
CCNA_01056		0.925333	1011383000	1000333000	0.0158491
CCNA_02558		0.453203	504713300	476598300	0.0826903
CCNA_00100		0.595412	268997500	298052500	-0.147974
tatA		0.739686	993721700	931518300	0.0932578
moaB		0.3171	265426000	239053300	0.150977
pgi		0.359498	4059233000	3709866000	0.12984
CCNA_03432		0.381205	758200000	694535000	0.126531
CCNA_03024		0.729549	4451033000	4350967000	0.0328041
CCNA_03431		0.281019	477133300	434648300	0.134544
CCNA_03023		0.465035	36517170000	39699830000	-0.120558
CCNA_03022		0.16735	178316700	234474000	-0.394986
CCNA_00973		0.968208	631371600	626956700	0.0101236
CCNA_00970		0.711686	3212967000	3293067000	-0.0355257
CCNA_00971		0.883467	886835000	898373300	-0.0186493
CCNA_03029		0.867132	462840000	450841700	0.0378926
CCNA_03028		0.80763	1115295000	1091153000	0.031572
CCNA_00974		0.448347	136367000000	123560000000	0.142274
CCNA_03383		0.993144	255868300	256158300	-0.00163422
CCNA_01110		0.647299	510542500	482565000	0.0813078
prmA		0.593941	1582167000	1659633000	-0.0689624
prmC		0.608155	724645000	679213300	0.0934097
bamD		0.872301	2459567000	2508733000	-0.0285546
bamE		0.790118	917905000	881055000	0.0591128
CCNA_01050		0.843704	406210000	396365000	0.0353962
CCNA_01051		0.923724	6313350000	6399084000	-0.0194597
accA		0.911237	3178067000	3148534000	0.0134693
bamA		0.986628	13705000000	13721670000	-0.00175375
bamB		0.887977	6550100000	6618083000	-0.0148965
CCNA_01055		0.681653	342990000	364166700	-0.0864325
CCNA_00635		0.0368486	511950000	370316000	0.467246
CCNA_00637		0.0199178	126090000	103620000	0.283151
exbB		0.356562	41784830000	44756830000	-0.0991286
CCNA_01728		0.987043	857150000	858376600	-0.00206305
CCNA_00585		0.655122	87336860	105624200	-0.274278
CCNA_01724		0.446293	1436267000	1562133000	-0.121193
ndk		0.544129	4337683000	4878467000	-0.169503
exbD		0.406633	1508167000	1669417000	-0.146548
xylX		0.839096	46763670000	47590830000	-0.0252955
serS		0.622579	5304350000	5080567000	0.0621865
CCNA_02709		0.481086	862726700	927620000	-0.10463
CCNA_02254		0.0515334	344900000	252710000	0.448695
CCNA_02704		0.815723	12199000000	11973330000	0.0269384
CCNA_02251		0.929044	860166700	847378400	0.0216099
CCNA_02250		0.488612	311465000	287835000	0.113828
msrA		0.757985	773120000	742145000	0.0589913
CCNA_03159		0.341939	921640000	1092572000	-0.245453
CCNA_01335		0.582664	250744300	294407500	-0.231598
divL		0.308553	513751700	431338300	0.252251
hup		0.421039	808791700	719360000	0.169054
CCNA_03653		0.745418	695068400	645013300	0.107826
CCNA_02312		0.0986898	10299220000	8768383000	0.232152
CCNA_02098		0.923963	1948417000	1933517000	0.011075
CCNA_03151		0.735581	3914633000	3757617000	0.059059
CCNA_00636		0.0433088	9901583000	8445250000	0.229519
CCNA_02095		0.307466	295450000	331326700	-0.16534
CCNA_02094		0.871889	874335000	861810000	0.0208163
CCNA_03155		0.187544	416688300	493205000	-0.243219
xylD		0.751032	54753170000	55958000000	-0.0314019
CCNA_03157		0.655307	27148000000	28934500000	-0.0919448
CCNA_03156		0.137878	2728033000	3299667000	-0.274459
CCNA_02900		0.0899445	273745000	231810000	0.23989
parE		0.451155	1241150000	1172665000	0.0818866
CCNA_00162	*	4.79295e-07	19672830000	49825500000	-1.34068
parC		0.763286	2063217000	2018383000	0.0316956
CCNA_00379		0.742074	1005512000	944701600	0.0899997
parA		0.675938	404848300	395822000	0.0325296
CCNA_00272		0.460741	157250000	165920000	-0.0774278
dnaX		0.876487	329180000	323150000	0.0266727
CCNA_02734		0.69207	582353300	620740000	-0.0920944
dnaA		0.12014	733588400	559906700	0.389784
alaS		0.54881	15396670000	14667330000	0.0700121
CCNA_02413		0.857419	2233617000	2275483000	-0.026791
dnaK		0.988067	29048000000	29087670000	-0.0019689
dnaJ		0.823492	212162000	208861700	0.0226183
ppx1		0.61801	410250000	440331600	-0.102087
ahcY		0.894447	41431670000	40891670000	0.018927
CCNA_02221		0.356303	1417383000	1277685000	0.149697
CCNA_02178		0.616116	1391200000	1319867000	0.0759373
CCNA_02179		0.118054	93492250	117582500	-0.330755
miaA		0.486196	142961700	152895000	-0.0969125
miaB		0.971969	547845000	544920000	0.00772333
CCNA_02223		0.1965	2627100000	2368500000	0.149497
CCNA_02174		0.0358975	5255517000	4343534000	0.274963
CCNA_03702		0.921493	70003000000	70524500000	-0.0107078
CCNA_00111		0.735437	520481700	551756700	-0.0841848
CCNA_01583		0.208681	8396967000	9440300000	-0.168964
CCNA_01584		0.747935	254216700	242330000	0.0690858
CCNA_00115		0.0344494	3702100000	2940300000	0.332381
prs		0.851488	4501634000	4426950000	0.0241357
CCNA_01031		0.522943	2087517000	2210517000	-0.0825959
CCNA_01588		0.688659	3366067000	3280817000	0.0370088
CCNA_01297		0.345103	330783300	364010000	-0.138092
ptrB		0.391575	6962584000	6461850000	0.107676
CCNA_01425		0.996512	1302050000	1302733000	-0.000756578
CCNA_01341		0.783627	1840633000	1902967000	-0.0480485
CCNA_02387		0.40143	1943500000	1786417000	0.121588
CCNA_01347		0.0918611	109034800	139683300	-0.357371
CCNA_02385		0.841091	6841350000	6745767000	0.0202986
CCNA_02384		0.739235	1351783000	1385283000	-0.0353172
efp		0.579082	2287367000	2424867000	-0.0842178
trpC		0.202498	485808300	423243300	0.1989
secD		0.701081	2466633000	2537833000	-0.0410541
trpA		0.779587	1657967000	1701850000	-0.0376886
CCNA_01961		0.296492	9559783000	8655333000	0.143389
CCNA_02831		0.465042	2409033000	2176100000	0.146709
CCNA_02738		0.819256	229628300	222403300	0.0461223
pnp		0.923882	40879000000	41217170000	-0.0118855
CCNA_01751		0.0825905	967180000	1084767000	-0.165529
CCNA_00109		0.859245	1699567000	1746617000	-0.0393961
CCNA_01971		0.826931	11046150000	10841750000	0.026946
grpE		0.547787	705573300	778458300	-0.141824
CCNA_00898		0.411401	500275000	443765000	0.172925
xylR		0.641605	762831700	800963300	-0.0703713
gyrB		0.851358	5145733000	5029967000	0.0328277
arcB		0.828255	3299533000	3229800000	0.030817
gyrA		0.501283	8074500000	8487483000	-0.0719639
CCNA_03279		0.152499	235845000	187185000	0.333374
rfaE		0.540107	369706700	393008300	-0.0881786
CCNA_00749		0.582085	1515133000	1629450000	-0.104941
rho		0.903278	5361717000	5288350000	0.0198774
CCNA_03839		0.00472736	3495950000	2269150000	0.623533
CCNA_00078		0.638287	1151000000	1106845000	0.0564346
CCNA_02252		0.482347	286321700	311956700	-0.123709
CCNA_00740		0.736764	596630000	572561700	0.0594054
CCNA_03830		0.9959	388855000	388570000	0.00105777
CCNA_03938		0.765537	3525450000	3809883000	-0.111939
CCNA_03030		0.526149	5847267000	6175133000	-0.0787077
CCNA_00065		0.458156	538563300	491316700	0.132463
surE		0.648013	401983300	380820000	0.0780263
CCNA_01691		0.226484	759831700	675156700	0.170458
CCNA_01519		0.376237	853866700	1067403000	-0.322022
CCNA_01653		0.542146	2776167000	2585850000	0.102456
gloB		0.430197	380015000	352776700	0.107301
CCNA_03714		0.557403	1476717000	1567850000	-0.0863942
CCNA_03205		0.754253	6441100000	6299467000	0.0320773
CCNA_03849		0.920013	498588300	491875000	0.0195573
CCNA_00893		0.422896	336152500	288430000	0.220895
thyA		0.266422	288031700	265756700	0.116122
CCNA_03617		0.615822	414424700	483266000	-0.221708
greA		0.268126	4942900000	5594583000	-0.178673
queA		0.0151589	270186000	352391700	-0.383227
CCNA_03575		0.441782	1437017000	1272723000	0.175159
CCNA_03574		0.341346	5283450000	6214317000	-0.234116
CCNA_01654		0.447533	681256600	597075000	0.190286
CCNA_00839		0.51684	1655617000	1568833000	0.0776772
queF		0.533225	515463300	575035000	-0.15778
cicA		0.576689	207698300	224138300	-0.1099
acrB3		0.422686	147036300	161566700	-0.135958
CCNA_03206		0.817746	232306700	224083300	0.0519956
CCNA_00831		0.609844	4895733000	5147617000	-0.0723798
CCNA_00830		0.959058	462951700	465188300	-0.00695313
CCNA_03771		0.00798347	790878300	587003300	0.430087
pstB		0.943221	1349517000	1341467000	0.00863159
rsmA		0.618173	277978300	261003300	0.0909042
CCNA_00933		0.601639	1563600000	1491133000	0.0684625
CCNA_00930		0.974775	1989083000	1997133000	-0.00582694
CCNA_00931		0.461811	3579667000	3240567000	0.143579
CCNA_01155		0.807288	13785500000	13448830000	0.0356709
xylC		0.862223	18058500000	17801000000	0.0207198
CCNA_00938		0.150478	229328300	291190000	-0.344546
CCNA_01769		0.0264796	148724000	113782400	0.38636
popA		0.244013	728661700	669106700	0.123013
xylB		0.8542	16100000000	16353170000	-0.0225096
ctaA		0.461635	231547500	194968800	0.248065
gshB		0.348078	2768733000	2573033000	0.105756
clpP		0.744697	5495550000	5783967000	-0.0737954
CCNA_01762		0.771415	107567300	122182500	-0.183798
sspB		0.413306	589040000	655253400	-0.153687
CCNA_03355		0.344597	10318270000	9422500000	0.131019
CCNA_01766		0.877666	1762100000	1726950000	0.0290695
CCNA_01019		0.0854457	262445000	320196700	-0.286943
CCNA_01603		0.527344	24004330000	23003000000	0.0614726
CCNA_01601		0.338888	44922000	62127330	-0.467806
CCNA_03378		0.86681	4139017000	4086500000	0.0184224
nagA		0.578237	481710000	410668000	0.230192
clpA		0.192723	3641517000	3264083000	0.157862
CCNA_01563		0.860754	13966500000	14162330000	-0.0200881
clpB		0.761363	1325382000	1275610000	0.0552209
odhA		0.913828	35526830000	35215670000	0.0126914
CCNA_01567		0.558113	574036700	542225000	0.0822513
CCNA_01549		0.249407	7430067000	6711333000	0.146776
CCNA_03693		0.720555	211141700	231641700	-0.133683
CCNA_02059		0.683395	1008167000	971670000	0.0531963
leuB		0.871405	9233533000	9115283000	0.0185953
leuC		0.53213	6251783000	5954284000	0.0703397
CCNA_03711		0.748985	4703500000	4945683000	-0.0724351
leuA		0.718788	9390083000	9681900000	-0.0441523
plsY		0.101398	343925000	391216700	-0.185874
plsX		0.266194	848721700	918328300	-0.113718
CCNA_02051	*	0.000356439	808453300	424558300	0.929202
CCNA_02050	*	2.6558e-05	1171772000	474421700	1.30445
CCNA_02054		0.92284	3149050000	3129833000	0.00883098
CCNA_03502		0.278643	266580000	313718300	-0.234901
CCNA_03503		0.33269	4315167000	4813600000	-0.1577
CCNA_03500		0.528545	582338300	551061700	0.0796436
CCNA_02902		0.955089	547638300	550556700	-0.0076678
rpiA		0.295314	1584200000	1804083000	-0.187511
leuS		0.43098	8821767000	8294650000	0.0888865
CCNA_03504		0.897166	533611700	523843400	0.0266547
CCNA_03505		0.746292	7481750000	7767534000	-0.0540809
CCNA_00331		0.35853	172354100	220253300	-0.353788
CCNA_00840		0.552234	275146700	258353300	0.0908557
CCNA_00846		0.924521	949291600	961036700	-0.0177402
CCNA_02588		0.716043	466616700	484416700	-0.0540107
parB		0.62542	1644717000	1711450000	-0.0573798
CCNA_00483		0.385554	1094540000	1012102000	0.11297
hetN		0.0719754	935265000	467545000	1.00027
dhmA		0.134557	157733300	136188500	0.211882
CCNA_02896		0.893332	214360000	211113300	0.0220183
CCNA_01122		0.405642	2535067000	2297450000	0.14199
phyR		0.758397	6481350000	6755067000	-0.0596757
CCNA_02457		0.506908	847006700	772596700	0.132658
nuoI		0.68592	583696600	550485000	0.0845154
CCNA_01204		0.678317	505085000	483506700	0.0629903
CCNA_00562		0.0578416	839353300	1171513000	-0.481023
CCNA_02516		0.717743	404344200	463113300	-0.195781
CCNA_03102		0.913841	1820500000	1841367000	-0.0164425
CCNA_03184	*	0.000375776	829900000	563583400	0.558308
CCNA_03185		0.69499	301948600	333700000	-0.144249
CCNA_03183		0.187854	387250000	308048400	0.330108
CCNA_02459		0.0192995	1095253000	880838300	0.314315
CCNA_03181		0.143738	512352500	331003300	0.630291
tyrS		0.845486	2243617000	2200317000	0.028115
hisF		0.969051	328453300	326325000	0.00937874
hisG		0.316836	1085218000	980621700	0.146216
CCNA_02590		0.498152	652793300	706185000	-0.11342
hisC		0.287157	2941417000	2711883000	0.117216
CCNA_00256		0.618543	434183300	463585000	-0.0945297
hrcA		0.226713	186175000	158591700	0.231342
CCNA_03609		0.158087	128783000000	146107000000	-0.182077
aroA		0.986988	1412783000	1410450000	0.00238436
aroB		0.96058	1327617000	1333667000	-0.00655948
aroC		0.436799	1516133000	1580433000	-0.0599236
CCNA_01463		0.782516	316897500	303266700	0.0634292
CCNA_02733		0.513288	87690140	102744300	-0.228572
CCNA_02222		0.600773	1052630000	1001817000	0.0713794
hisS		0.765836	3973433000	3852767000	0.0444911
CCNA_03603		0.586648	2020383000	1935267000	0.0620962
CCNA_01303		0.234945	1052113000	922558300	0.189578
CCNA_03607		0.607988	1771600000	1695467000	0.0633702
CCNA_02401		0.379091	556428400	613648300	-0.141216
CCNA_01261		0.116277	483895000	539515000	-0.156969
CCNA_03227		0.0519362	3842083000	2781300000	0.466129
CCNA_00849		0.641631	263821700	275870000	-0.0644253
ruvB		0.0539129	196101700	160276700	0.291037
CCNA_01268		0.595225	204288300	222655000	-0.124203
CCNA_00206		0.724578	581088300	563720000	0.0437787
CCNA_00200		0.840324	3174117000	3226250000	-0.0235029
CCNA_00201		0.335788	1933550000	2338417000	-0.27428
CCNA_01830		0.990267	141645000	141440000	0.0020895
cspC		0.232187	7111350000	8423900000	-0.244365
uvrA		0.310754	459566700	539601700	-0.231621
rpoZ		0.307634	528396700	433821700	0.284519
CCNA_00413		0.485625	1267050000	1344617000	-0.0857218
metG		0.621297	3649167000	3522000000	0.0511723
gmk		0.805293	518618300	545882500	-0.0739173
CCNA_00669		0.584662	232073300	241220000	-0.055769
murA		0.647805	4399033000	4212233000	0.0626012
CCNA_02458		0.68433	1528533000	1491867000	0.0350288
CCNA_02243		0.791575	267000000	243220000	0.134578
rpsH		0.59499	5142667000	5520900000	-0.102387
CCNA_02047		0.409544	64777500000	61149170000	0.0831599
CCNA_00021		0.403853	773590000	701663400	0.14079
CCNA_01991		0.820197	7811267000	7537683000	0.0514355
CCNA_00024		0.901314	414228300	422188400	-0.0274608
CCNA_00025		0.0165918	1080245000	941613300	0.198152
CCNA_00027		0.184914	1800183000	2101083000	-0.22299
CCNA_00028		0.458391	56790840000	63209330000	-0.154479
CCNA_01998		0.626905	1724083000	1823833000	-0.0811444
CCNA_00523		0.2164	455063300	531066700	-0.222826
tuf		0.921676	306240000000	304155000000	0.00985601
CCNA_01412		0.179115	147695000	170953300	-0.210981
rpoC		0.960679	67953160000	67655500000	0.00633342
CCNA_01416		0.620886	795006700	842188400	-0.083176
CCNA_01417		0.776668	523995000	498096700	0.0731272
CCNA_01414		0.11709	202191700	137895000	0.552154
CCNA_01415		0.642674	1710483000	1621233000	0.0773123
hutU		0.569592	41972170	45882250	-0.128503
lpxA		0.0281304	1000095000	853848300	0.228085
CCNA_01418		0.0583352	338681700	456193300	-0.429715
lpxD		0.3025	419868000	373558300	0.168602
hisD		0.117007	1299283000	1202400000	0.111799
CCNA_02416		0.696375	4173583000	3967033000	0.0732261
tsf		0.937299	46528670000	46864830000	-0.0103857
CCNA_03527		0.167977	866645000	756190000	0.196692
xseA		0.274041	98154000	133875000	-0.447768
mreC		0.571723	443146700	415283300	0.0936885
CCNA_02845		0.887802	1885783000	1915233000	-0.0223562
CCNA_02846		0.77484	18772330000	19207170000	-0.0330372
dnaN		0.717715	10350670000	10649470000	-0.0410575
CCNA_02224		0.643949	1404317000	1353567000	0.0531023
CCNA_02842		0.483609	325761700	299466700	0.121421
CCNA_03521		0.333521	113343000	95500250	0.247119
chlI		0.78766	226511700	218982500	0.04877
CCNA_01199		0.802668	935650000	953796700	-0.0277128
CCNA_03300		0.87965	2087533000	2061333000	0.0182214
CCNA_03522		0.579879	2049550000	1948733000	0.0727707
CCNA_03735		0.983106	9356784000	9342800000	0.00215776
CCNA_00138		0.669081	4997683000	5239683000	-0.0682201
CCNA_01196		0.336749	142974200	178133300	-0.317202
CCNA_03733	*	8.82589e-07	225720000	523891600	-1.21473
CCNA_01194		0.459471	333861700	371233300	-0.153076
acrB		0.20553	556916700	500756700	0.153352
ccmE		0.0695616	189121700	254620000	-0.429031
CCNA_02923		0.792416	1727900000	1794450000	-0.054522
CCNA_00998		0.742622	579056600	548650000	0.0778183
CCNA_03909		0.342855	2927783000	3252067000	-0.151548
rph		0.728887	2346367000	2410617000	-0.0389738
fumC		0.893549	11256280000	11117650000	0.0178783
CCNA_00734		0.443478	280786000	308740000	-0.136921
CCNA_03402		0.187184	1389367000	1191265000	0.221933
CCNA_02641		0.12898	1205183000	1040163000	0.212443
sppA		0.857993	5128133000	5059150000	0.0195387
CCNA_03864		0.701461	729648300	680933300	0.0996877
CCNA_00732		0.256732	791523300	699885000	0.177514
panB		0.279642	253191700	223666000	0.178884
CCNA_02093		0.0223043	912415000	655481700	0.477135
CCNA_00733		0.233285	417765000	366511700	0.188832
CCNA_01645		0.722078	272774000	261401700	0.0614376
CCNA_02573		0.495804	416628300	465150000	-0.158935
CCNA_01640		0.854127	165840000	164540000	0.0113537
frr		0.648111	4149067000	4392033000	-0.0821019
CCNA_03233		0.909033	2371867000	2424183000	-0.0314755
CCNA_01522		0.870416	348285000	341616700	0.0278898
CCNA_00145		0.161134	186506700	218731700	-0.229935
CCNA_01520		0.0238215	417945000	608657500	-0.542318
CCNA_01521		0.119421	497116700	400728300	0.31096
CCNA_01480		0.453067	413905000	458398300	-0.147302
dut		0.80044	384727500	372991700	0.0446934
CCNA_00968		0.835929	977906700	989623300	-0.0171826
CCNA_01203		0.474007	237755000	218141700	0.12421
CCNA_02540		0.00901441	5573000000	4337916000	0.361452
CCNA_02173		0.0547737	479375000	362703300	0.402365
CCNA_02545		0.892253	1221100000	1205897000	0.0180747
CCNA_02012		0.434242	2239800000	2095783000	0.0958806
CCNA_02011		0.778761	719828400	692643300	0.0555404
lpxI		0.408691	218558300	196905000	0.150518
CCNA_02549		0.73602	150656500	166092500	-0.140724
CCNA_03012		0.650141	8373750000	8880884000	-0.0848294
panD		0.720642	665250000	704613300	-0.0829351
ppk1		0.357577	609236700	531400000	0.197205
CCNA_03541		0.330576	664841700	740670000	-0.15582
CCNA_03421		0.333926	121205500	106811500	0.182388
CCNA_02448		0.96681	2257933000	2270017000	-0.00770042
rpmJ		0.527417	426851600	389330000	0.132741
CCNA_00803		0.321198	279536700	246761700	0.179919
CCNA_00843		0.0663431	517388400	585581700	-0.178623
CCNA_03780		0.512139	576001700	657955000	-0.191916
rpmC		0.198056	858351700	697393300	0.299596
rpmB		0.728237	1055910000	1007967000	0.0670385
rpmE		0.536269	436125000	384248300	0.182703
rpmD		0.36771	995061600	1116200000	-0.165738
lgt		0.998725	282176700	282105000	0.00036663
xylA		0.969585	59105830000	58944500000	0.00394324
CCNA_03455		0.40058	791616600	814045000	-0.0403067
CCNA_03414		0.667652	11811220000	11446000000	0.0453145
CCNA_01164		0.175247	546001700	451208400	0.275112
CCNA_01165		0.177201	524988300	463440000	0.179903
CCNA_01162		0.693774	295753300	273840000	0.111061
nusG		0.147394	6468817000	7286050000	-0.171635
CCNA_01042		0.874513	19947170000	19578330000	0.0269264
nusB		0.633766	164925000	147490000	0.161193
nusA		0.729298	14117000000	13748330000	0.0381771
CCNA_01733		0.481716	290101700	317781700	-0.131477
CCNA_00185		0.155131	244653300	216830000	0.174174
CCNA_02779		0.466862	990888300	931213400	0.0896106
CCNA_01737		0.549365	198870000	181455000	0.132214
coxB		0.704339	18442500000	17900830000	0.0430078
coxA		0.801971	2976000000	3044717000	-0.0329336
CCNA_01636		0.601263	3535483000	3392950000	0.0593672
murG		0.236398	1064712000	928373400	0.197686
CCNA_01143		0.509541	167623300	146675000	0.1926
CCNA_01585		0.661769	70319670000	73760500000	-0.0689201
dgcB		0.311343	3402333000	3669417000	-0.109027
CCNA_02261		0.378416	5413900000	5049967000	0.100394
CCNA_02090		0.363243	431800000	476228400	-0.14129
CCNA_01586		0.574569	11588650000	12241920000	-0.0791173
pepA		0.932527	12889500000	12791670000	0.0109917
CCNA_01587		0.953376	5998800000	5967417000	0.00756734
CCNA_02307		0.550133	641963300	603105000	0.0900816
CCNA_02305		0.995933	1222597000	1223527000	-0.00109701
CCNA_02304		0.149184	381018300	441183300	-0.211518
CCNA_02062		0.287207	272165000	247266700	0.138414
CCNA_02225		0.149617	447035000	535378300	-0.260171
CCNA_01556		0.984287	1147753000	1151047000	-0.00413454
fabA		0.42924	1442033000	1552867000	-0.10683
CCNA_03640		0.140737	1511983000	1317947000	0.19815
CCNA_03643		0.120559	1026270000	840395000	0.288271
CCNA_02065		0.356237	1950283000	2104050000	-0.109486
CCNA_01226		0.157045	258650000	303586700	-0.231107
fabI		0.777523	3436067000	3333767000	0.0436049
CCNA_01220		0.159828	2518833000	2159883000	0.221802
CCNA_01223		0.811561	3386666000	3281550000	0.0454883
CCNA_03163		0.97658	1089427000	1092158000	-0.00361205
yidC		0.729878	3644683000	3531300000	0.045594
CCNA_00361		0.128984	139850000	119707500	0.224367
gpmA		0.898206	6499983000	6577917000	-0.0171949
CCNA_00367		0.191405	1712133000	1882433000	-0.136804
CCNA_00364		0.692957	5004950000	4860583000	0.0422263
CCNA_03495		0.190974	1053480000	802845000	0.39197
engB		0.289433	492345000	537520000	-0.126649
CCNA_01936		0.310184	446506700	415691700	0.103168
glnE		0.763955	213423300	208098300	0.0364525
glnD		0.814232	993855000	1019503000	-0.0367587
CCNA_00457		0.526684	96025340	88872000	0.111686
CCNA_01396		0.488826	572526700	595338400	-0.056367
CCNA_00451		0.894293	982991700	999676700	-0.0242824
CCNA_00519		0.032735	516282500	385862500	0.420074
thrB		0.859352	740280000	750553300	-0.0198835
CCNA_03531		0.128531	373406700	298536700	0.32284
CCNA_02464		0.939695	162483300	164686700	-0.0194326
CCNA_02465		0.0148379	2516183000	3208450000	-0.35064
pal		0.800394	7928667000	7578383000	0.0651883
CCNA_00511		0.529879	1632667000	1505350000	0.117132
CCNA_00103		0.34548	172691700	192753300	-0.158557
CCNA_00720		0.34494	558103400	628040000	-0.170324
CCNA_00403		0.147511	701551600	579253300	0.276355
CCNA_01746		0.521507	11919150000	11178780000	0.0925186
CCNA_02161		0.819494	1101592000	1129180000	-0.0356855
CCNA_02342		0.761165	327045000	346901700	-0.0850378
CCNA_02607		0.900542	51628500000	51100160000	0.0148399
CCNA_02604		0.329065	390708400	574723300	-0.556775
CCNA_02605		0.61604	476363300	506000000	-0.0870751
CCNA_01593		0.804933	2925833000	2848083000	0.0388562
CCNA_02600		0.58851	467176700	504023300	-0.109522
CCNA_02601		0.631957	1981017000	2079367000	-0.0699031
rnd		0.819039	3720534000	3656933000	0.0248755
CCNA_01453		0.712928	819351700	864806700	-0.0778949
CCNA_01898		0.466203	182462400	217821700	-0.255548
CCNA_01353		0.0812908	3171017000	2551667000	0.313506
CCNA_01352		0.090744	467148300	494558300	-0.08226
coaE		0.303676	275358300	303475000	-0.140268
CCNA_01344		0.321035	163800000	193657500	-0.241572
CCNA_01172		0.684701	6673700000	6334500000	0.0752561
CCNA_02741		0.127796	3820133000	2978800000	0.358892
gltD		0.390074	6303867000	5876917000	0.101178
mipZ		0.491382	846570000	794030000	0.0924358
trpB		0.760957	6013317000	5907917000	0.0255115
CCNA_03619		0.738995	13485330000	13927000000	-0.0464937
flgE		0.832483	1221135000	1130698000	0.111009
fusA		0.944952	113167000000	112566000000	0.00768218
lptD		0.350394	2294067000	2094450000	0.131336
CCNA_00579		0.85359	673551700	684761700	-0.0238133
CCNA_03695		0.0588675	1022698000	1349183000	-0.399706
topA		0.657909	3567817000	3433783000	0.0552427
rsmB		0.528885	226876700	248135000	-0.129217
kduI		0.939252	1014142000	1020678000	-0.00926813
mfd		0.150837	984143300	835886700	0.235561
chpT		0.74715	906196700	939690000	-0.0523607
rsmH		0.14411	241105000	151569500	0.669682
rpsE		0.424753	9082900000	10151750000	-0.160504
CCNA_01090		0.28807	6409150000	5741200000	0.158781
CCNA_03435		0.168574	108222200	93041830	0.218045
CCNA_03548		0.663935	1487133000	1568467000	-0.0768215
CCNA_01689		0.913879	7056016000	7003367000	0.0108051
CCNA_00773		0.14294	984336700	881540000	0.159126
CCNA_01372		0.677787	226335000	217376000	0.058267
CCNA_00778		0.986691	9491283000	9479516000	0.00178972
CCNA_00072		0.749678	422323300	398530000	0.0836595
CCNA_03827		0.823793	715515000	687180000	0.058294
CCNA_03821		0.562151	349626700	367648300	-0.072511
CCNA_03820		0.377622	332496700	367541700	-0.144568
CCNA_00075		0.281964	5351750000	4440550000	0.269272
CCNA_00074		0.559991	15439000000	14604170000	0.0801989
sufB		0.605881	233548300	213763300	0.127707
sufC		0.700378	563773300	589510000	-0.0644011
CCNA_03748		0.48302	287268300	314518300	-0.130745
cheB		0.740528	8283533000	8035017000	0.0439451
sufD		0.480124	248413300	219785000	0.176649
mreB		0.0844248	5724917000	6387050000	-0.157895
CCNA_01559		0.437634	379431700	347756700	0.125762
divJ		0.231732	296028300	269225000	0.136923
accD		0.21893	1121952000	915233300	0.2938
carA		0.310525	1782650000	1556500000	0.195718
gmd		0.756922	1183017000	1159767000	0.0286358
cenR		0.507107	250783300	271682500	-0.11548
adk		0.625202	1760850000	1638483000	0.103911
rpmA		0.545396	1276270000	1193167000	0.0971376
rpsL		0.913197	5203267000	5297617000	-0.0259258
CCNA_02112		0.755237	548393300	536566700	0.0314534
amn		0.876769	1558717000	1577400000	-0.0171895
CCNA_02242		0.114747	928080000	682238300	0.443973
CCNA_03467		0.698312	3574000000	3357350000	0.0902167
CCNA_02832		0.965219	848263300	845206700	0.00520794
rsfS		0.0514346	536401700	641896600	-0.259027
rne		0.79543	8175617000	8361333000	-0.0324053
CCNA_03309		0.567312	778536600	747295000	0.059087
CCNA_03744		0.269568	208740000	164175000	0.346473
CCNA_03098		0.22601	728868400	625573300	0.220479
ychF		0.819248	5344133000	5237917000	0.0289627
CCNA_00921		0.220911	96734000	134655000	-0.477173
CCNA_00920		0.449652	3377783000	2892617000	0.223701
trpS		0.759983	3592333000	3673950000	-0.0324109
rnr		0.39782	399275000	378718300	0.0762576
CCNA_03732		0.588979	1477733000	1418650000	0.0588669
CCNA_00929		0.913953	944210000	928538300	0.0241463
CCNA_03311		0.45988	113632800	103315700	0.13732
CCNA_03299		0.150222	439263300	372580000	0.237536
stpA		0.117442	679658400	558848300	0.282353
CCNA_02088		0.248021	88607360	127235000	-0.521997
stpC		0.593218	249997500	273002500	-0.127
stpB		0.612224	1331117000	1263183000	0.0755737
pgk		0.420548	11405930000	10692050000	0.0932456
stpD		0.055246	440291700	339743300	0.374015
CCNA_03148		0.588105	2062667000	1972000000	0.0648514
nuoB		0.638892	1195267000	1269617000	-0.0870604
nuoC		0.83633	4810700000	4951433000	-0.0415993
CCNA_03699		0.402183	14616330000	13632500000	0.100531
CCNA_03149		0.125786	250725000000	219848000000	0.189597
nuoF		0.961547	5636233000	5616050000	0.00517547
nuoG		0.428729	15968500000	15069000000	0.0836451
nuoD		0.596044	11710500000	11298930000	0.0516165
CCNA_00230		0.379874	243321700	215146700	0.177544
nuoJ		0.961497	648268400	650746700	-0.00550484
rpsS		0.480003	1391567000	1249945000	0.154846
CCNA_01972		0.645482	2143483000	2060067000	0.0572657
nuoN		0.68553	412190000	426305000	-0.0485765
CCNA_00233		0.267996	1514133000	1392600000	0.120711
CCNA_03265		0.822549	243602700	227718300	0.0972799
CCNA_02347		0.938877	1989100000	2004550000	-0.0111626
CCNA_03680		0.293952	873983400	761181600	0.199365
CCNA_01943		0.34746	3127817000	3462717000	-0.146748
CCNA_03682		0.522627	294506800	349255000	-0.24598
CCNA_03684		0.986578	186678700	187538300	-0.00662793
CCNA_02340		0.763783	17166830000	16526170000	0.0548712
CCNA_03577		0.202138	1806883000	1579100000	0.194401
proS		0.84671	8147950000	8292333000	-0.0253409
CCNA_03127		0.67978	2172933000	2087917000	0.0575793
CCNA_00859		0.851446	1118758000	1090078000	0.0374666
CCNA_03510		0.825125	7263384000	7388300000	-0.0246006
CCNA_02972		0.451711	80498170	90222500	-0.164531
zwf		0.580193	2654717000	2512217000	0.079597
CCNA_03412		0.699331	1279367000	1210653000	0.0796448
CCNA_00851		0.996274	448838300	448616700	0.000712462
CCNA_00326		0.752677	930731600	898678300	0.0505604
CCNA_00324		0.732802	6533050000	6830567000	-0.0642487
CCNA_00288		0.92872	5595333000	5542017000	0.0138129
proA		0.798822	523028300	513516700	0.0264778
CCNA_01139		0.62677	5495667000	5707933000	-0.0546738
CCNA_01579		0.336254	612538300	539565000	0.183003
bacB		0.664259	570578300	606856600	-0.0889308
CCNA_01677		0.131128	225653300	133440000	0.757917
CCNA_01490		0.311962	137305200	172043300	-0.325385
murB		0.117479	655668400	606956700	0.111373
murC		0.556036	2839200000	2692700000	0.076431
murD		0.331844	920110000	835403300	0.139334
CCNA_02085		0.739928	1735883000	1682300000	0.0452347
fzeB		0.0299116	5679700000	4608517000	0.301512
fzeA		0.367288	9377150000	8749850000	0.0998912
CCNA_00656		0.18032	1395400000	1205060000	0.211574
ddl		0.659662	966171600	1003528000	-0.0547295
cydA		0.355107	1006537000	836111700	0.267633
CCNA_00658		0.99318	904875000	905745000	-0.00138642
CCNA_01706		0.194724	215690000	254702500	-0.239854
CCNA_00083		0.106903	777791700	880945000	-0.179668
bamF		0.373417	380462500	325588300	0.224705
CCNA_02913		0.397858	254830000	299441700	-0.23274
CCNA_00073		0.551242	598673300	635823400	-0.0868572
CCNA_02231		0.732076	4743466000	4600083000	0.0442817
nuoE		0.895487	3522967000	3469000000	0.0222711
CCNA_02237		0.532902	3394500000	3192667000	0.088437
CCNA_02236		0.993912	1912350000	1914350000	-0.00150803
CCNA_02235		0.281754	1468033000	1611667000	-0.134669
kdsA		0.398857	1741467000	1881100000	-0.111273
CCNA_02332		0.440076	111646500	135465000	-0.278982
CCNA_03263		0.145689	370336700	505353300	-0.448455
CCNA_02721		0.858219	5446350000	5377250000	0.0184212
CCNA_02337		0.778125	747935000	720861700	0.0531904
CCNA_02335		0.229525	453307500	403228400	0.168893
CCNA_02338		0.589536	623546700	665305000	-0.0935183
CCNA_03637		0.841347	142280000	137820700	0.0459403
CCNA_00095		0.790605	668893300	654705000	0.0309311
CCNA_03496		0.0834391	527261700	451496700	0.223804
rsaFa		0.668975	1966883000	2030633000	-0.0460184
CCNA_00212		0.958071	1783733000	1775350000	0.00679621
CCNA_00211		0.893743	1682950000	1700317000	-0.0148114
rsaFb		0.901834	8319483000	8240767000	0.0137153
CCNA_00217		0.32451	421226700	394383300	0.0949984
CCNA_00215		0.652081	14552500000	14052170000	0.0504741
CCNA_00214		0.785736	97141500000	99398840000	-0.0331413
CCNA_00352		0.409935	163920500	131951600	0.312987
CCNA_01575		0.249289	2403500000	2125150000	0.177572
CCNA_02915		0.378929	1216783000	1126780000	0.110866
CCNA_01259		0.100291	1566333000	1728033000	-0.14174
pbpX		0.577522	1821033000	1927617000	-0.0820614
pbpY		0.0180926	298680000	190725000	0.647107
pheS		0.649587	1937400000	1848117000	0.0680658
CCNA_01826		0.747496	297728000000	290113000000	0.0373799
srp		0.360213	2888267000	2644933000	0.126973
rpmG		0.557504	1076470000	1136582000	-0.0783937
CCNA_01803		0.78537	19907670000	19571170000	0.0245944
pheT		0.312244	6794217000	6310633000	0.106523
CCNA_00424		0.967538	4388400000	4372133000	0.00535774
rpsM		0.806093	7295767000	7510900000	-0.0419261
CCNA_00405		0.9325	610686700	616775000	-0.0143119
lovK		0.940992	932618400	937871700	-0.00810368
CCNA_00422		0.501504	72148660	63615000	0.181606
bioB		0.90512	867701700	856170000	0.0193019
CCNA_03681		0.388932	2015350000	1845650000	0.126901
ppa		0.681822	1260743000	1326050000	-0.072861
CCNA_03838		0.395241	406295000	360473300	0.172635
CCNA_02346		0.506839	389162500	347597500	0.162955
rpsD		0.917223	25841670000	26083670000	-0.0134476
CCNA_03683		0.9598	755730000	749365000	0.0122023
CCNA_01218		0.107316	241223300	281648300	-0.223525
rpmF		0.908553	835950000	844020000	-0.0138605
CCNA_01750		0.331963	10643350000	9909250000	0.103105
lexA		0.487168	524301700	552283300	-0.0750113
CCNA_02150		0.952992	1086503000	1093162000	-0.00881506
CCNA_02889		0.637821	370988000	326565000	0.184002
CCNA_03808		0.456047	298212800	376642500	-0.336854
CCNA_00346		0.88757	41814840000	42209670000	-0.0135585
CCNA_00255		0.819067	565215000	576755000	-0.0291589
CCNA_02434		0.837845	281070500	297988000	-0.0843222
cheAI		0.146528	1052178000	850091600	0.307689
CCNA_01400		0.407318	450093300	396698300	0.182182
CCNA_00123		0.998957	1550733000	1550933000	-0.000186054
CCNA_03835	*	0.000221758	11608700000	7403633000	0.648901
CCNA_03642		0.261764	21639170000	19583000000	0.144043
CCNA_01409		0.302815	544076700	619111700	-0.18639
acsA		0.604017	1378933000	1459850000	-0.0822678
CCNA_03686		0.748113	921080000	943875000	-0.0352693
lon		0.775098	7804917000	7621334000	0.0343397
tig		0.824383	38109170000	38900000000	-0.029632
CCNA_00695		0.954158	2720317000	2706867000	0.00715078
CCNA_03689		0.240331	10424450000	13756330000	-0.400124
CCNA_01919		0.852618	145407000	149701000	-0.0419871
CCNA_00086		0.665447	8616116000	8321017000	0.0502778
rpsK		0.579338	5804850000	6106516000	-0.0730907
CCNA_02854		0.891243	673730000	659546700	0.0306957
CCNA_03396		0.398382	513291600	468233300	0.132551
CCNA_00742		0.604176	662673300	624276700	0.0861122
CCNA_01917		0.720095	364365000	355905000	0.0338922
hflX		0.604808	241378300	257701700	-0.0944061
CCNA_01914		0.908699	289252500	282857500	0.032254
CCNA_03483		0.123489	238978300	193496700	0.304571
CCNA_00323		0.196779	2171250000	1915133000	0.181081
rlmN		0.816414	179998000	172275000	0.0632675
CCNA_03705		0.644607	619470000	584048300	0.0849467
CCNA_03706		0.343186	170028300	144038200	0.239323
CCNA_01695		0.596325	87840250	76062000	0.207706
rlmE		0.521444	159863000	130520200	0.292563
CCNA_01065		0.24296	362743300	406015000	-0.162584
fmt		0.712464	347641700	358716700	-0.0452438
infC		0.446886	2901917000	3133167000	-0.110615
infB		0.797305	15688830000	15996000000	-0.0279734
infA		0.745866	318038300	298196000	0.0929396
cheYI		0.529843	384632500	323037500	0.251779
fabH		0.960884	1841817000	1849083000	-0.00568026
fliL		0.461549	339026700	309911600	0.129542
rpsJ		0.0675804	3603900000	4236317000	-0.233252
CCNA_03239		0.599792	1046142000	996318300	0.0704001
CCNA_02693		0.837681	465293300	507308400	-0.124723
ihfB		0.553046	126035800	145120000	-0.203413
CCNA_00671		0.765323	86481250	89781250	-0.0540268
CCNA_00726		0.403968	404642500	356320000	0.183474
CCNA_01648		0.944023	333323300	331705000	0.00702141
rplN		0.929541	4764517000	4717817000	0.0142105
CCNA_03856		0.304544	51859000	45401330	0.19186
CCNA_03485		0.278149	3506900000	3186483000	0.138231
CCNA_01678		0.563472	371968300	341696700	0.122463
CCNA_03806		0.495162	256877500	281823300	-0.13371
CCNA_00188		0.885187	529480000	520561700	0.024507
rplL		0.825386	13996880000	13549000000	0.0469189
CCNA_01535		0.28898	3208917000	3557983000	-0.148973
CCNA_01534		0.509083	404535000	438806700	-0.117321
rpsI		0.41028	9054284000	9758349000	-0.108037
rplM		0.892693	11134520000	11317100000	-0.0234649
dipM		0.730821	13686170000	13271830000	0.0443515
CCNA_00989		0.0191992	824090000	499803300	0.721441
CCNA_01533		0.238375	37873000	57851670	-0.611189
rplJ		0.650425	9355934000	8875783000	0.0760073
truB		0.443388	242126700	220505000	0.134951
CCNA_01539		0.786641	218495000	225328300	-0.0444283
CCNA_01538		0.25757	35071160000	31559670000	0.152203
phnC		0.500316	221265000	238291700	-0.106953
sciP		0.705512	221560000	201420000	0.137491
CCNA_01738		0.0378223	43208000000	35226500000	0.294637
ctaG		0.416367	550433300	637546700	-0.211963
CCNA_02572		0.993906	10355430000	10349900000	0.000770633
CCNA_00359		0.428751	1761350000	1949067000	-0.146102
CCNA_03115		0.800994	1709117000	1750700000	-0.0346807
CCNA_01698		0.753189	878525000	858601700	0.0330943
CCNA_03557		0.412266	18944500000	17562170000	0.109308
CCNA_03002		0.224309	149708300	164063300	-0.132098
recA		0.914857	2205567000	2186317000	0.012647
CCNA_00817		0.336301	254890000	226298300	0.171649
CCNA_03802		0.706342	2412283000	2508667000	-0.0565218
CCNA_00810		0.768321	1919583000	1978150000	-0.0433589
fljL		0.274553	1413655000	1753333000	-0.31067
CCNA_00594		0.661603	12739170000	12280170000	0.0529408
CCNA_01174		0.36728	708713300	652211600	0.119862
CCNA_01176		0.442875	399351700	463251600	-0.214136
CCNA_00591		0.00512382	12054730000	15137000000	-0.32848
CCNA_00592	*	5.94215e-05	1088860000	1673117000	-0.61972
CCNA_00593		0.288682	1174500000	1256850000	-0.0977658
CCNA_02130		0.584477	3449433000	3288533000	0.0689151
CCNA_00687		0.660326	151850200	180416700	-0.248684
CCNA_00487		0.0174824	417775000	323396700	0.369421
rplY		0.320527	33478670000	36528170000	-0.125767
CCNA_01178		0.818932	1125852000	1088750000	0.0483445
CCNA_00611		0.320684	335606700	373928400	-0.155991
CCNA_00610		0.725319	274448100	299366700	-0.12538
CCNA_01629		0.69729	1200372000	1248552000	-0.0567743
CCNA_01747		0.751674	6337867000	6066467000	0.0631408
CCNA_01745		0.462332	1243168000	1103947000	0.17135
CCNA_03094		0.339769	2460850000	2154317000	0.191926
CCNA_00857		0.685134	2985767000	2890783000	0.0466413
ispDF		0.847991	324124000	330215000	-0.0268598
CCNA_03097		0.347845	1655000000	1471750000	0.169299
CCNA_00886		0.836509	19803000000	20123000000	-0.0231264
CCNA_02566		0.306928	1638200000	1465450000	0.160768
rplA		0.461146	27075830000	28911500000	-0.0946379
CCNA_03316		0.265406	512866700	440186700	0.220468
ctrA		0.584618	1612483000	1494933000	0.109203
CCNA_03314		0.227648	5214750000	4820550000	0.1134
CCNA_02277		0.196737	34783500000	49670830000	-0.513996
lipA		0.288957	480951700	416751700	0.206704
CCNA_02275		0.294272	13659450000	17883670000	-0.388743
CCNA_02273		0.688948	194470000	209190000	-0.105266
CCNA_02378		0.410446	199501700	230855000	-0.210586
murI		0.543449	773131600	822321700	-0.0889889
lysA		0.410174	733005000	689030000	0.0892562
CCNA_03672		0.835922	3605733000	3463133000	0.0582148
CCNA_03674		0.821014	1191420000	1228270000	-0.0439456
CCNA_03675		0.469376	1332500000	1242105000	0.101348
CCNA_01210		0.361258	388504000	420855000	-0.115394
CCNA_02881		0.178898	3051683000	2690150000	0.181918
fljN		0.988275	487225000	486146700	0.00319643
CCNA_03177		0.102887	687043300	562650000	0.288163
CCNA_00889		0.369763	921233300	1058842000	-0.200849
CCNA_01217		0.914943	636838300	643121700	-0.0141647
pyrG		0.491438	2998800000	2794700000	0.101692
pyrF		0.550244	333495000	362785000	-0.12145
pyrE		0.995261	789680000	789041700	0.00116661
lysS		0.599031	5856233000	5615433000	0.0605757
pyrC		0.899468	2117017000	2094467000	0.0154497
pyrB		0.381209	717841700	651683300	0.139495
CCNA_02642		0.119013	2740000000	2358833000	0.216103
pdxH		0.177841	182015000	204091700	-0.16516
pdxJ		0.520326	531086700	560076700	-0.076677
CCNA_00315		0.980527	860630000	858711700	0.00321928
CCNA_02352		0.712585	3143417000	3069650000	0.0342595
CCNA_00313		0.389642	4240817000	3936933000	0.10727
CCNA_03294		0.93978	1625567000	1611250000	0.0127627
CCNA_00311		0.907459	2696667000	2669983000	0.0143468
pdxA		0.901289	173092500	170645000	0.0205451
CCNA_01672		0.114035	65040890	166421200	-1.35542
bacA		0.620976	482970000	458835000	0.0739581
CCNA_00357		0.426706	393656700	413641700	-0.0714436
glpX		0.455162	2482367000	2628100000	-0.0823037
hlyD		0.491874	1462850000	1556450000	-0.0894774
CCNA_00502		0.148054	148692500	171635000	-0.207012
CCNA_03422		0.630611	1677683000	1746450000	-0.0579552
CCNA_00507		0.564409	9018784000	9713800000	-0.107103
CCNA_00506		0.0986907	4375733000	4019083000	0.122658
CCNA_00505		0.424312	12818500000	14706830000	-0.198259
CCNA_00146		0.291703	310426700	349722500	-0.171958
glpK		0.978493	667516700	665505000	0.00435443
leuD		0.374168	935030000	1018625000	-0.123538
