# Supplementary material for: Gene network analysis identifies a central post-transcriptional regulator of cellular stress survival
Source: eLife journal article supplement (doi:10.7554/elife.33684), 2018-03-14
Supplement: supp [file elife-33684-supp-v1.zip › elife_poa_e33684_Supplementary_File_1.xlsx]

## Sheet: Strains
Identifier	Genotype	Source
FC#19	CB15	Poindexter, 1964, PMC441226
FC#674	CB15 ΔsigT	Herrou et al., 2010, PMC2959141
FC#2838	CB15 ΔCCNA_R0081( ΔgsrN )	This work
FC#799	CB15 ΔphyR	Herrou et al., 2010, PMC2959141
FC#1688	CB15 ΔphyK	Foreman et al., 2012, 3370868
FC#2394	CB15 ΔlovR	This work
FC#1188	CB15 ΔlovK	Purcell et al., 2007, PMC2084327
FC#672	CB15 ΔsigU	This work
FC#2839	CB15 ΔCCNA_00535	This work
FC#2840	CB15 ΔCCNA_03669	This work
FC#2841	CB15 ΔCCNA_00201	This work
FC#2842	CB15 ΔCCNA_00987	This work
FC#2843	CB15 ΔCCNA_03668	This work
FC#700	CB15 ΔCCNA_01418	This work
FC#670	CB15 ΔCCNA_00282	This work
FC#671	CB15 ΔCCNA_01601	This work
FC#2844	CB15 ΔCCNA_03587	This work
FC#675	CB15 ΔCCNA_01237	This work
FC#2845	CB15 /pRKlac290- PgsrN	This work
FC#2846	CB15 ΔsigT /pRKlac290- PgsrN	This work
FC#642	CB15 /pRKlac290-PsigU	Foreman et al., 2012, 3370868
FC#820	CB15 ΔsigT /pRKlac290-PsigU	Foreman et al., 2012, 3370868
FC#2847	CB15 ΔgsrN/pRKlac290-PsigU	This work
FC#814	CB15 ΔphyR/pRKlac290-PsigU	Foreman et al., 2012, 3370868
FC#1701	CB15 ΔphyK/pRKlac290-PsigU	Foreman et al., 2012, 3370868
FC#2848	CB15 vanA::pMT552-3gsrN /pRKlac290-PsigU	This work
FC#647	CB15 vanA::pMT552-EV	This work
FC#2849	CB15 ΔgsrN vanA::pMT552-EV	This work
FC#2850	CB15 ΔgsrN vanA::pMT552-PgsrN-gsrN	This work
FC#2851	CB15 vanA::pMT552-gsrN	This work
FC#2852	CB15 ΔgsrN vanA::pMT552-3gsrN	This work
FC#2853	CB15 vanA::pMT552-3gsrN (gsrN++)	This work
FC#2854	CB15 ΔsigT vanA::pMT552-PvanA-gsrN	This work
FC#2855	CB15 ΔsigT xylX::pMT585-PxylX-gsrN	This work
FC#451	CB15 xylX::pMT674-EV
FC#2856	CB15 ΔgsrN xylX::pMT674-EV	This work
FC#2857	CB15 ΔgsrN xylX::pMT674-gsrN	This work
FC#2858	CB15 ΔgsrN xylX::pMT674-gsrNΔ(1-58) (gsrNΔ3')	This work
FC#2859	CB15 ΔgsrN xylX::[pMT674-2gsrNΔ(1-58)	This work
FC#2860	CB15 gsrNΔ(10-50) (gsrNΔ5')	This work
FC#2861	CB15 gsrNΔ(10-50) xylX::pMT674-gsrN	This work
FC#2862	CB15 gsrNΔ(10-50) xylX::pMT674-gsrN(1-58)	This work
FC#2863	CB15 ΔgsrN vanA::pMT552-5'PP7hp-gsrN	This work
FC#2864	CB15 ΔgsrN vanA::pMT552-gsrN(37)PP7hp	This work
FC#2865	CB15 ΔgsrN vanA::pMT552-PgsrN-gsrN(54)PP7hp	This work
FC#2866	CB15 ΔgsrN vanA::pMT552-PgsrN-gsrN(59)PP7hp	This work
FC#2867	CB15 ΔgsrN vanA::pMT552-PgsrN-gsrN(67)PP7hp	This work
FC#2868	CB15 ΔgsrN vanA::pMT552-PgsrN-gsrN(93)PP7hp	This work
FC#2869	CB15 ΔgsrN vanA::pMT552-PgsrN-gsrN(1-5)-PP7hp-gsrN(56-112)	This work
FC#2870	CB15 /pRKlac290-promoter katG	This work
FC#2871	CB15 ΔgsrN /pRKlac290-promoter katG	This work
FC#2872	CB15 vanA::pMT552-3gsrN /pRKlac290-promoter katG	This work
FC#2873	CB15 /pPR9TT-PrpoD(vanA)-katG(1-190)	This work
FC#2874	CB15 ΔgsrN /pPR9TT-PrpoD(vanA)-katG(1-190)	This work
FC#2875	CB15 vanA::pMT552-3gsrN /pPR9TT-PrpoD(vanA)-katG(1-190)	This work
FC#2876	CB15 vanA::pMT552-EV/pPR9TT-PrpoD(vanA)-katG(RS)(1-190)	This work
FC#2877	CB15 ΔgsrN vanA::pMT552-EV/pPR9TT-PrpoD(vanA)-katG(RS)(1-190)	This work
FC#2878	CB15 vanA::pMT552-3gsrN /pPR9TT-PrpoD(vanA)-katG(RS)(1-190)	This work
FC#2879	CB15 ΔgsrN vanA::pMT552-gsrN(RS)	This work
FC#2880	CB15 ΔgsrN vanA::pMT552-3gsrN(RS)	This work
FC#2881	CB15 ΔgsrN vanA::pMT552-3gsrN(RS) xylX::pMT680-3gsrN(RS)	This work
FC#2882	CB15 ΔgsrN vanA::pMT552-3gsrN /pPR9TT-PrpoD(vanA)-katG(1-190)	This work
FC#2883	CB15 ΔgsrN vanA::pMT552-3gsrN /pPR9TT-PrpoD(vanA)-katG(RS)(1-190)	This work
FC#2884	CB15 ΔgsrN vanA::pMT552-3gsrN(RS) /pPR9TT-PrpoD(vanA)-katG(1-190)	This work
FC#2885	CB15 ΔgsrN vanA::pMT552-3gsrN(RS) /pPR9TT-PrpoD(vanA)-katG(RS)(1-190)	This work
FC#2886	CB15 katG(RS) ΔgsrN vanA::pMT552-3gsrN	This work
FC#2887	CB15 katG(RS) ΔgsrN vanA::pMT552-3gsrN(RS)	This work
FC#2888	CB15 ΔkatG /pRKlac290- gsrN promoter	This work
FC#2889	CB15 katG(RS) /pRKlac290- gsrN promoter	This work
FC#2890	CB15 katG-M2	This work
FC#2891	CB15 katG-M2 ΔgsrN	This work
FC#2892	CB15 katG-M2 vanA::pMT552-3gsrN	This work
FC#2893	Rosetta (DE3) pLysS / pMal-MBP-PP7cp-HIS	This work
FC#2931	CB15 ΔkatG	This work
FC#2932	CB15 katG(RS)	This work
FC#2933	CB15 ΔkatG ΔgsrN	This work
FC#2965	CB15 xylX::pMT680-katG	This work
FC#2966	CB15 ΔkatG xylX::pMT680-katG	This work
FC#2967	CB15 ΔkatG vanA::pMT552-3gsrN	This work
FC#2972	CB15 Δhfq	This work
FC#2973	CB15 xylX::pMT612-hfq	This work
FC#2974	CB15 Δhfq pMT552-3gsrN	This work
FC#2975	CB15 Δhfq pMT552-EV	This work

## Sheet: Plasmids
Identifier	Genotype	Source
FC#2894	Top10 /pNPTS138-CCNA_R0081(10-95)	This work
FC#2383	Top10 /pNPTS138-lovR	This work
FC#1209	Top10 /pNPTS138-sigU	This work
FC#2895	Top10 /pNPTS138-CCNA_00535	This work
FC#2896	Top10 /pNPTS138-CCNA_03669	This work
FC#2897	Top10 /pNPTS138-CCNA_00201	This work
FC#2898	Top10 /pNPTS138-CCNA_00987	This work
FC#2899	Top10 /pNPTS138-CCNA_03668	This work
FC#2900	Top10 /pNPTS138-CCNA_03587	This work
FC#2901	Top10 /pNPTS138-CCNA_01418	This work
FC#2902	Top10 /pNPTS138-CCNA_00282	This work
FC#2903	Top10 /pNPTS138-CCNA_01601	This work
FC#2904	Top10 /pNPTS138-CCNA_01237	This work
FC#2905	Top10 /pRKlac290-PgsrN promoter	This work
FC#634	Top10 /pRKlac290-PsigU promoter	Foreman et al., 2012, 3370868
FC#2906	Top10 /pMT552-PgsrN-gsrN	This work
FC#2907	Top10 /pMT552-(PgsrN-gsrN)x3	This work
FC#2908	Top10 /pMT552-PrpoD(vanA)-gsrN	This work
FC#2909	Top10 /pMT585-PrpoD(xylX)-gsrN	This work
FC#2910	Top10 /pMT674-PgsrN-gsrN(1-58)	This work
FC#2911	Top10 /pMT674-PgsrN-gsrN	This work
FC#2912	Top10 /pNPTS138-CCNA_R0081(10-50)	This work
FC#2913	Top10 /pMT552-PgsrN-5'PP7hp-gsrN	This work
FC#2914	Top10 /pMT552-PgsrN-gsrN(37)PP7hp	This work
FC#2915	Top10 /pMT552-PgsrN-gsrN(54)PP7hp	This work
FC#2916	Top10 /pMT552-PgsrN-gsrN(59)PP7hp	This work
FC#2917	Top10 /pMT552-PgsrN-gsrN(67)PP7hp	This work
FC#2918	Top10 /pMT552-PgsrN-gsrN(93)PP7hp	This work
FC#2919	Top10 /pMT552-PgsrN-gsrN(1-5)-PP7hp-gsrN(56-112)	This work
FC#2920	Top10/ pMal-MBP-PP7cp-HIS	This work
FC#2921	Top10/ pET28_3xFLAG_PP7CP_His	Gift from Alex Ruthenburg, originally from Kathleen Collins (Addgene Plasmid #21339)
FC#2922	Top10 /pRKlac290-promoter katG	This work
FC#2923	Top10 /pPR9TT-PrpoD(vanA)-katG(1-190)	This work
FC#2924	Top10 /pPR9TT-PrpoD(vanA)-katG(RS)(1-190)	This work
FC#2925	Top10 /pMT552-PgsrN-gsrN(RS)	This work
FC#2926	Top10 /pMT552-(PgsrN-gsrN(RS))x3	This work
FC#2927	Top10 /pMT680-(PgsrN-gsrN(RS))x3	This work
FC#2928	Top10 /pNPTS138-CCNA_03138 (katG)	This work
FC#2929	Top10 /pNPTS138-CCNA_03138 (katG(RS))	This work
FC#2930	Top10 /pNPTS138-CCNA_03138 (katG::M2)	This work
MTLS# 4266	Top10/pMT552-EV	Thanbichler et al., 2007, PMC2175322
MTLS# 4396	Top10/pMT585-EV	Thanbichler et al., 2007, PMC2175322
MTLS# 4259	Top10/pMT674-EV	Thanbichler et al., 2007, PMC2175322
MTLS# 4389	Top10/pMT680-EV	Thanbichler et al., 2007, PMC2175322
FC#55	DH10B/pNPTS138	Ried and Collmer, 1987, PMC2013925
FC#54	S17-1:E.coli 294::RP4-2(Tc::Mu)(Km::T7)/pRKlac290	Ely, 1991, 1658564
FC#1101	Top10/pPR9TT	Santos et al., 2001, 11167001
FC#118	Top10/pMal	New England Biolabs (E8200S)
FC#2968	Top10/ pMT680-katG	This work
FC#2976	Top10/ pNPTS138-CCNA_01819(hfq)	This work
FC#2977	Top10/ pMT612-hfq	This work

## Sheet: Oligos
Identifier	Name	Sequence	Source	Plasmid	Restriction Enzyme Sites
Primers
1016	R0081 KO A Up-F	ATCGACTAGTAAGCAAGGAGGACCGACATG	This work	FC#2894	SpeI
1017	R0081 KO B Up-R	GTCCGGCGCCTTCGCACTCACAAAA	This work	FC#2894
1018	R0081 KO C Down-F	AAGGCGCCGGACCGCCTTTCCTTATG	This work	FC#2894
1019	R0081 KO D Down-R	ATCGAAGCTTAACATCGATGCGCTTCATGC	This work	FC#2894	HindIII
1082	R0081 (10-50) KO B Up-R	GAAGGCCGCCTTCGCACTCACAAAA	This work	FC#2915
1083	R0081 (10-50) KO C Down-F	AAGGCGGCCTTCGCACCCCTTTGTTG	This work	FC#2915
1022	PgsrN F	CATAGAATTCGGCAACGCCTCTTCAAAAA	This work	FC#2905
1023	PgsrN R	CATAAAGCTTCCGCCTTCGCACTCACAA	This work	FC#2905
1044	03668_KO A Up-F	ATCGACTAGTCTAAGCAAGGAGGACCGACA	This work	FC#2899	SpeI
1045	03668_KO B Up-R	ATGATGATGTGGACGCCATAGCCACG	This work	FC#2899
1046	03668_KO C Down-F	CCACATCATCATGACGTCGCTCCCCT	This work	FC#2899
1047	03668_KO D Down-R	ATCGAAGCTTGTCGCCGAAGTTCTGCACGA	This work	FC#2899	HindIII
1048	00987_KO A Up-F	ATCGACTAGTCTCCTATCCGCTGACGCCGT	This work	FC#2898	SpeI
1049	00987_KO B Up-R	TAGCCTGCTCATGGCCAAATCCTCTG	This work	FC#2898
1050	00987_KO C Down-F	ATGAGCAGGCTATGACTGACAAGGCG	This work	FC#2898
1051	00987_KO D Down-R	ATCGAAGCTTGAGCTGGCGAATGTCGAGAT	This work	FC#2898	HindIII
1052	03587_KO A Up-F	ATCGACTAGTCGATCCGCATGCTGATCAAG	This work	FC#2900	SpeI
1053	03587_KO B Up-R	ATGCGTTAAGTCTTAGGCCAAGGTCC	This work	FC#2900
1054	03587_KO C Down-F	GACTTAACGCATCATTTTCTCCGCTG	This work	FC#2900
1055	03587_KO D Down-R	ATCGAAGCTTTCATTGATCCGGATCGCTTG	This work	FC#2900	HindIII
1056	03669_KO A Up-F	ATCGACTAGTATCATGACGTCGCTCCCCTG	This work	FC#2896	SpeI
1057	03669_KO B Up-R	ACGACCTATTACTGGGAAGACGGCGC	This work	FC#2896
1058	03669_KO C Down-F	GTAATAGGTCGTCTTCATCTTGGCTC	This work	FC#2896
1059	03669_KO D Down-R	ATCGAAGCTTTGCGGTAGCATGTTCATGGT	This work	FC#2896	HindIII
1060	00201_KO A Up-F	ATCGACTAGTCCTTCAGGTCGTAGTGGTCT	This work	FC#2897	SpeI
1061	00201_KO B Up-R	GGTCAGGAATTTCGGCATGGTCGCAA	This work	FC#2898
1062	00201_KO C Down-F	AAATTCCTGACCTGATGGCTCTACGG	This work	FC#2899
1063	00201_KO D Down-R	ATCGAAGCTTTGTGCACGCCCTCGTACATC	This work	FC#2900	HindIII
1009	00535 KO A Up-F	CATACTAGTGCTCACCTTCGTCGATGACA	This work	FC#2895	SpeI
1010	00535 KO B Up-R	GCGTAGGACGCCGGCGAGCTTAAG	This work	FC#2895
1011	00535 KO C Down-F	GGCGTCCTACGCAACGGCTGATCG	This work	FC#2895
1012	00535 KO D Down-R	CATAAAGCTTCTTGGGCTCTTCGAACTCGT	This work	FC#2895	HindIII
	lovR KO A Up-F	AAAAGAATTCGTCGCTGAGAGGTATGCTGG	This work	FC#2383	EcoRI
	lovR KO B Up-R	CAGGGTGTCAATCAGAACATCGAGCGCTGG	This work	FC#2383
	lovR KO C Down-F	ATGTTCTGATTGACACCCTGACCTGATACGC	This work	FC#2383
	lovR KO D Down-R	AAAAGGATCCATTTCCTTGTTGATCGCGCC	This work	FC#2383	BamI
	sigU KO A Up-F	GAATTCCGGGATGACATGGGATTTT	This work	FC#1209	EcoRI
	sigU KO B Up-R	CTCGAGTTCGAAGCTCTTCTGAGTCTG	This work	FC#1209	XhoI
	sigU KO C Down-F	CTCGAGATGCTGCGCGATCTGGAAC	This work	FC#1209	XhoI
	sigU KO D Down-R	AAGCTTCCCAGACACACCAGTGACAG	This work	FC#1209	HindIII
	01418 KO A Up-F	AAGCTTAAATCGGCTTGAACCACTTG	This work	FC#2901	HindIII
	01418 KO B Up-R	CTCGAGTGTTATTGTCGTCATCGTTCG	This work	FC#2901	XhoI
	01418 KO C Down-F	CTCGAGCGAGGCAGCTGAGCCATCAT	This work	FC#2901	XhoI
	01418 KO D Down-R	GAATTCGACATCATCGAAGGCACGTT	This work	FC#2901	EcoRI
	00282 KO A Up-F	GAATTCATCCGCATGACCTGGAC	This work	FC#2902	EcoRI
	00282 KO B Up-R	GGATCCGATCAGCATCAGCGTGGAACG	This work	FC#2902	BamI
	00282 KO C Down-F	GGATCCCACGAGGCGACAAAGTAA	This work	FC#2902	BamI
	00282 KO D Down-R	AAGCTTCAAGAACGTGATCCTGATGC	This work	FC#2902	HindIII
	01237 KO A Up-F	GAATTCTCGATGCTTTCGAGGTCTCT	This work	FC#2904	EcoRI
	01237 KO B Up-R	CTCGAGAAGCCGCTTTCGGTTCAC	This work	FC#2904	XhoI
	01237 KO C Down-F	CTCGAGTTCCGCCTGTGACCAGTC	This work	FC#2904	XhoI
	01237 KO D Down-R	AAGCTTCGAGGTTCTGCGCCATAG	This work	FC#2904	HindIII
	01601 KO A Up-F	GAATTCACCGTCACCTTGGTGGTTT	This work	FC#2903	EcoRI
	01601 KO B Up-R	TCTAGAATGTTCCAACTTCGTTTGAGG	This work	FC#2903	XbaI
	01601 KO C Down-F	TCTAGAGACGACGCCAAGTCCAAGT	This work	FC#2903	XbaI
	01601 KO D Down-R	AAGCTTGCTCGTGCGAATAGAACCA	This work	FC#2903	HindIII
1090	gsrN F	CCTCGAGCTCCTCTTCAAAAAAATCGCGGTG	This work	FC#2906	SacI
1091	gsrN R	CATCGGTACCTCGCCGAAGTTCTGCACGAA	This work	FC#2906	KpnI
1069	pET28_3xFLAG_PP7CP_HIS F	CAATGAATTCATGGCCAAAACCATCGTTCT	This work	FC#2927	EcoRI
1070	pET28_3xFLAG_PP7CP_HIS R	CAATGTCGACTCAGTGGTGGTGGTGGTGGT	This work	FC#2927	SalI
1191	PkatG F	CATAGAATTCGAGCCTTGGTCAAGGCCGG	This work	FC#2922	EcoRI
1192	PkatG R	CATACTGCAGGCGCCTAGAAGCCGCTCTT	This work	FC#2922	PstI
1194	tandem mutant A F	GTTCGAATTCTCCGGAGCTCCTCTTCAAAAAAATCGCGGTG	This work	FC#2930	SacI
1195	tandem mutant A R	ACTGGCCGTCGTTTTACTCGCCGAAGTTCTGCACGAA	This work	FC#2930
1196	tandem mutant B F	CGAGTAAAACGACGGCCAGTCTCTTCAAAAAAATCGCGGTG	This work	FC#2930
1197	tandem mutant B R	GTCATAGCTGTTTCCTGTCGCCGAAGTTCTGCACGAA	This work	FC#2930
1198	tandem mutant C F	CGACAGGAAACAGCTATGACCTCTTCAAAAAAATCGCGGTG	This work	FC#2930
1199	tandem mutant C R	TTAATTAATATGCATGGTACCTGATCGCCGAAGTTCTGCACGAA	This work	FC#2930	KpnI
1138	katG_KO A	ATCGACTAGTGCAGCGGTTCGCCTTCAC	This work	FC#2928	SpeI
1139	katG_KO B	GTCCGCGTTGGCGGGACCACGACC	This work	FC#2928
1140	katG_KO C	GCCAACGCGGACTCGCAGGAGAAG	This work	FC#2928
1141	katG_KO D	ATCGAAGCTTGATCGGCCACGTCTCGCC	This work	FC#2928	HindIII
1204	katG KI B	CATCAGGGGCACGCGCCTAGAAGCCGCTCTTT	This work	FC#2929
1205	katG KI C	GCGTGCCCCTGATGGAAACACCTGCGCGGAG	This work	FC#2929
1173	katG_Cterm_M2 A	TACGTAATACGACTCACTAGGGCCGACTTGATCGTGCTG	This work	FC#2930
1174	katG_Cterm_M2 B	CAGGTCGACGCGGGTTGC	This work	FC#2930
1175	katG_Cterm_M2 C	CGAGGCTTCCGGGATGACAC	This work	FC#2930
1176	katG_Cterm_M2 D	AGATATCCTGCAGAGAAGCTGTCGATCGGCCACGTCTCG	This work	FC#2930
1179	katG_Cterm_M2 E	GACGACGACGACAAGTGATAGGATCTGGCGGCTTAGGATCTG	This work	FC#2930
1178	katG_Cterm_M2 F	GTGTCATCCCGGAAGCCTCG	This work	FC#2930
1142	katG_OE F	CATCCATATGATGGAAACACCTGCGCGG	This work	FC#2968	NdeI
1143	katG_OE R	CATCGGTACCGTGTCATCCCGGAAGCCTC	This work	FC#2968	KpnI
1037	hfq_KO A Up-F	ATCGACTAGTGGTTTGTCGACGACATGGGC	This work	FC#2976	SpeI
1038	hfq_KO B Up-R	GTCGTCCTTCTTTTCGGCGGACATACG	This work	FC#2976
1039	hfq_KO C Down-F	AAGAAGGACGACTGACCCTAGAGCCGT	This work	FC#2976
1040	hfq_KO D Down-R	ATCGAAGCTTTCAGCCGATTGAACAGCGT	This work	FC#2976	HindIII
1041	hfq Xyl F	CATCCATATGTCCGCCGAAAAGAAGCAAAAT	This work	FC#2977	NdeI
1042	hfq Xyl R	CATCGGTACCCTCTAGGGTCAGTCGTCGGC	This work	FC#2977	KpnI
Northern Blot probes
NB02	Landt Probe (62-89)	CCGGTCCGCCTGAGTTCGCATCAACAAA	Landt et al., 2008, 10.1111/j.1365-2958.2008.06172.x
NB05	R0081 Probe (10-57)	TGCGAAGGCGGCGGACTGGCTTTCGCCAGTCTCAAGTCGGGGGGCGTC	This work
NB13	5S rRNA Probe	CTTGAGACGAAGTACCATTGGCCCAGGGGGACTTAACGAC	This work
NB24	tRNA-Tyr probe	CCTTTGCCACTCGGGACATTCC	This work
NB21	katG probe	TCAGGCCCTCCAGGCGCAGGCTCTGGGGCCACCAGTCCCG	This work
1077	T7 PP7hp Template Strand	GGAGCGACGCCATATCGTCTGCTCCTATAGTGAGTCGTATTAGTGATC	This work
Primers for Reverse Transcription Reactions
1186	anti-sense to GsrN 18-36	CGCCAGTCTCAAGTCGGGG	This work
1189	anti-sense to GsrN 72-89	GGTCCGCCTGAGTTCGCA	This work
NB12	anti-sense to GsrN 81-105	AAGGCGGTCCGGTCACCCGGTCCGC	This work

## Sheet: Gene Blocks
Identifier	Name	Sequence	Plasmid(s)
G003	R0081 tandem A	GTTCGAATTCTCCGGAGCTCCGCGCGGCAACGCCTCTTCAAAAAAATCGCGGTGCGCGGGAACCAAGGGACGGGGCGGTCGTTTTGTGAGTGCGAAGGCGGCGACGCCCCCCGACTTGAGACTGGCGAAAGCCAGTCCGCCGCCTTCGCACCCCTTTGTTGATGCGAACTCAGGCGGACCGGGTGACCGGACCGCCTTTCCTTATGCGCCGAGGCCAACCGCCGCGACCTGCACCGTTCAAGCCTCTGGGCTCGCAAGGCTCGCATGGCAAGCCCTGCTTCTGCGATCGCAGACACACCAAAGGCGACCGGCCGGCCCTATCGCCTTCGTGCAGAACTTCGGCGAGTAAAACGACGGCCAGT	FC#2907
G004	R0081 tandem B	CGAGTAAAACGACGGCCAGTCTCTTCAAAAAAATCGCGGTGCGCGGGAACCAAGGGACGGGGCGGTCGTTTTGTGAGTGCGAAGGCGGCGACGCCCCCCGACTTGAGACTGGCGAAAGCCAGTCCGCCGCCTTCGCACCCCTTTGTTGATGCGAACTCAGGCGGACCGGGTGACCGGACCGCCTTTCCTTATGCGCCGAGGCCAACCGCCGCGACCTGCACCGTTCAAGCCTCTGGGCTCGCAAGGCTCGCATGGCAAGCCCTGCTTCTGCGATCGCAGACACACCAAAGGCGACCGGCCGGCCCTATCGCCTTCGTGCAGAACTTCGGCGACAGGAAACAGCTATGAC	FC#2907
G005	R0081 tandem C	CGACAGGAAACAGCTATGACCTCTTCAAAAAAATCGCGGTGCGCGGGAACCAAGGGACGGGGCGGTCGTTTTGTGAGTGCGAAGGCGGCGACGCCCCCCGACTTGAGACTGGCGAAAGCCAGTCCGCCGCCTTCGCACCCCTTTGTTGATGCGAACTCAGGCGGACCGGGTGACCGGACCGCCTTTCCTTATGCGCCGAGGCCAACCGCCGCGACCTGCACCGTTCAAGCCTCTGGGCTCGCAAGGCTCGCATGGCAAGCCCTGCTTCTGCGATCGCAGACACACCAAAGGCGACCGGCCGGCCCTATCGCCTTCGTGCAGAACTTCGGCGACGCGCTCAGGAGCGGGTACCATGCATATTAATTAA	FC#2907
G006	Pvan(rpoD)::R0081 complementation	CCTCGAGCTCCTCTTCAAAAAAATCGCGGTGCGCGTTGACGTCCGTTTGATTACGATCAAGATTGTGAGTGCGAAGGCGGCGACGCCCCCCGACTTGAGACTGGCGAAAGCCAGTCCGCCGCCTTCGCACCCCTTTGTTGATGCGAACTCAGGCGGACCGGGTGACCGGACCGCCTTTCCTTATGCGCCGAGGCCAACCGCCGCGACCTGCACCGTTCAAGCCTCTGGGCTCGCAAGGCTCGCATGGCAAGCCCTGCTTCTGCGATCGCAGACACACCAAAGGCGACCGGCCGGCCCTATCGCCTTCGTGCAGAACTTCGGCGAGGTACCGATG	FC#2908
G007	Pxyl(rpoD)::R0081 complementation	CCTCGAGCTCCTCTTCAAAAAAATCGCGGTGCGCGTTGCCGTCCCCACATGTTAGCGCTACCAATGTGAGTGCGAAGGCGGCGACGCCCCCCGACTTGAGACTGGCGAAAGCCAGTCCGCCGCCTTCGCACCCCTTTGTTGATGCGAACTCAGGCGGACCGGGTGACCGGACCGCCTTTCCTTATGCGCCGAGGCCAACCGCCGCGACCTGCACCGTTCAAGCCTCTGGGCTCGCAAGGCTCGCATGGCAAGCCCTGCTTCTGCGATCGCAGACACACCAAAGGCGACCGGCCGGCCCTATCGCCTTCGTGCAGAACTTCGGCGAGGTACCGATG	FC#2909
G002	R0081 1-58nt complementation	CATCGGTACCCTCTTCAAAAAAATCGCGGTGCGCGGGAACCAAGGGACGGGGCGGTCGTTTTGTGAGTGCGAAGGCGGCGACGCCCCCCGACTTGAGACTGGCGAAAGCCAGTCCGCCGCCTTCGCGCCTTTCCTTATGCGCCGAGGCCAACCGCCGCGACCTGCACCGTTCAAGCCTCTGGGCTCGCAAGGCTCGCATGGCAAGCCCTGCTTCTGCGATCGCAGACACACCAAAGGCGACCGGCCGGCCCTATCGCCTTCGTGCAGAACTTCGGCGACATATGGATG	FC#2912
G009	5'PP7hp R0081	CCTCGAGCTCCTCTTCAAAAAAATCGCGGTGCGCGGGAACCAAGGGACGGGGCGGTCGTTTTGTGAGTGCGAACTAGAAAGGAGCAGACGATATGGCGTCGCTCCCTGCAGGGCGAAGGCGGCGACGCCCCCCGACTTGAGACTGGCGAAAGCCAGTCCGCCGCCTTCGCACCCCTTTGTTGATGCGAACTCAGGCGGACCGGGTGACCGGACCGCCTTTCCTTATGCGCCGAGGCCAACCGCCGCGACCTGCACCGTTCAAGCCTCTGGGCTCGCAAGGCTCGCATGGCAAGCCCTGCTTCTGCGATCGCAGACACACCAAAGGCGACCGGCCGGCCCTATCGCCTTCGTGCAGAACTTCGGCGAGGTACCGATG	FC#2917
G012	R0081-PP7hp@37nt	CCTCGAGCTCCTCTTCAAAAAAATCGCGGTGCGCGGGAACCAAGGGACGGGGCGGTCGTTTTGTGAGTGCGAAGGCGGCGACGCCCCCCGACTTGAGACTGGCGAGGAGCAGACGATATGGCGTCGCTCCAAGCCAGTCCGCCGCCTTCGCACCCCTTTGTTGATGCGAACTCAGGCGGACCGGGTGACCGGACCGCCTTTCCTTATGCGCCGAGGCCAACCGCCGCGACCTGCACCGTTCAAGCCTCTGGGCTCGCAAGGCTCGCATGGCAAGCCCTGCTTCTGCGATCGCAGACACACCAAAGGCGACCGGCCGGCCCTATCGCCTTCGTGCAGAACTTCGGCGAGGTACCGATG	FC#2918
G013	R0081-PP7hp@54nt	CCTCGAGCTCCTCTTCAAAAAAATCGCGGTGCGCGGGAACCAAGGGACGGGGCGGTCGTTTTGTGAGTGCGAAGGCGGCGACGCCCCCCGACTTGAGACTGGCGAAAGCCAGTCCGCCGCCTGGAGCAGACGATATGGCGTCGCTCCTCGCACCCCTTTGTTGATGCGAACTCAGGCGGACCGGGTGACCGGACCGCCTTTCCTTATGCGCCGAGGCCAACCGCCGCGACCTGCACCGTTCAAGCCTCTGGGCTCGCAAGGCTCGCATGGCAAGCCCTGCTTCTGCGATCGCAGACACACCAAAGGCGACCGGCCGGCCCTATCGCCTTCGTGCAGAACTTCGGCGAGGTACCGATG	FC#2919
G014	R0081-PP7hp@59nt	CCTCGAGCTCCTCTTCAAAAAAATCGCGGTGCGCGGGAACCAAGGGACGGGGCGGTCGTTTTGTGAGTGCGAAGGCGGCGACGCCCCCCGACTTGAGACTGGCGAAAGCCAGTCCGCCGCCTTCGCGGAGCAGACGATATGGCGTCGCTCCACCCCTTTGTTGATGCGAACTCAGGCGGACCGGGTGACCGGACCGCCTTTCCTTATGCGCCGAGGCCAACCGCCGCGACCTGCACCGTTCAAGCCTCTGGGCTCGCAAGGCTCGCATGGCAAGCCCTGCTTCTGCGATCGCAGACACACCAAAGGCGACCGGCCGGCCCTATCGCCTTCGTGCAGAACTTCGGCGAGGTACCGATG	FC#2920
G015	R0081-PP7hp@67nt	CCTCGAGCTCCTCTTCAAAAAAATCGCGGTGCGCGGGAACCAAGGGACGGGGCGGTCGTTTTGTGAGTGCGAAGGCGGCGACGCCCCCCGACTTGAGACTGGCGAAAGCCAGTCCGCCGCCTTCGCACCCCTTTGGAGCAGACGATATGGCGTCGCTCCTTGATGCGAACTCAGGCGGACCGGGTGACCGGACCGCCTTTCCTTATGCGCCGAGGCCAACCGCCGCGACCTGCACCGTTCAAGCCTCTGGGCTCGCAAGGCTCGCATGGCAAGCCCTGCTTCTGCGATCGCAGACACACCAAAGGCGACCGGCCGGCCCTATCGCCTTCGTGCAGAACTTCGGCGAGGTACCGATG	FC#2921
G016	R0081-PP7hp@93nt	CCTCGAGCTCCTCTTCAAAAAAATCGCGGTGCGCGGGAACCAAGGGACGGGGCGGTCGTTTTGTGAGTGCGAAGGCGGCGACGCCCCCCGACTTGAGACTGGCGAAAGCCAGTCCGCCGCCTTCGCACCCCTTTGTTGATGCGAACTCAGGCGGACCGGGTGGAGCAGACGATATGGCGTCGCTCCGACCGGACCGCCTTTCCTTATGCGCCGAGGCCAACCGCCGCGACCTGCACCGTTCAAGCCTCTGGGCTCGCAAGGCTCGCATGGCAAGCCCTGCTTCTGCGATCGCAGACACACCAAAGGCGACCGGCCGGCCCTATCGCCTTCGTGCAGAACTTCGGCGAGGTACCGATG	FC#2923
G017	PP7hp+R0081(TERMhp)	CCTCGAGCTCCTCTTCAAAAAAATCGCGGTGCGCGGGAACCAAGGGACGGGGCGGTCGTTTTGTGAGTGCGAACTAGAAAGGAGCAGACGATATGGCGTCGCTCCCTGCAGGGAGGCGGACCGGGTGACCGGACCGCCTTTCCTTATGCGCCGAGGCCAACCGCCGCGACCTGCACCGTTCAAGCCTCTGGGCTCGCAAGGCTCGCATGGCAAGCCCTGCTTCTGCGATCGCAGACACACCAAAGGCGACCGGCCGGCCCTATCGCCTTCGTGCAGAACTTCGGCGAGGTACCGATG	FC#2924
G020	rpoD-katG-5'UTR	ATCGGGTACCCAATCAATTTGACGTCCGTTTGATTACGATCAAGATTAGGCGCGTCGGGGTGATGGAAACACCTGCGCGGAGGAACACGCCAATGGACGCCAAGGTCGAAGACAATATCGCGGGCAAATGCCCCATGGGCCACGGTCGTGGTCCCGCCAACCGGGACTGGTGGCCCCAGAGCCTGCGCCTGGAGGGCCTGAACCAGCACGCCCCGCGCTCCAATCCGATGGGCGAGGCGTTCGAAAGCTTATTG	FC#2923
G024	rpoD-katG-5'UTR (RS)	ATCGGGTACCCAATCAATTTGACGTCCGTTTGATTACGATCAAGATTAGGCGCGTGCCCCTGATGGAAACACCTGCGCGGAGGAACACGCCAATGGACGCCAAGGTCGAAGACAATATCGCGGGCAAATGCCCCATGGGCCACGGTCGTGGTCCCGCCAACCGGGACTGGTGGCCCCAGAGCCTGCGCCTGGAGGGCCTGAACCAGCACGCCCCGCGCTCCAATCCGATGGGCGAGGCGTTCGAAAGCTTATTG	FC#2924
G023	R0081 binding site swap katG	CCTCGAGCTCCTCTTCAAAAAAATCGCGGTGCGCGGGAACCAAGGGACGGGGCGGTCGTTTTGTGAGTGCGAAGGCGGCGACGCCGGGGCACTTGAGACTGGCGAAAGCCAGTCCGCCGCCTTCGCACCCCTTTGTTGATGCGAACTCAGGCGGACCGGGTGACCGGACCGCCTTTCCTTATGCGCCGAGGCCAACCGCCGCGACCTGCACCGTTCAAGCCTCTGGGCTCGCAAGGCTCGCATGGCAAGCCCTGCTTCTGCGATCGCAGACACACCAAAGGCGACCGGCCGGCCCTATCGCCTTCGTGCAGAACTTCGGCGAGGTACCGATG	FC#2925
G019	katG Cterm M2	GCAACCCGCGTCGACCTGATCTTCGGCTCCCACGCCGAACTGCGGGCCTTCGCCGAGGTCTATGCCTGCGCGGACTCGCAGGAGAAGTTCGTCTGCGACTTCGTCACCGCCTGGAACAAGGTGATGAACGCCGACCGCCTGGATCTGGCGGCTGGATCGGGGAGCATGGACTATAAGGACCATGACGGGGATTATAAGGACCACGACATCGACTATAAGGACGACGACGACAAGTGA	FC#2930
